# Supplementary material for: Prospecting for natural products by genome mining and microcrystal electron diffraction
Source: Springer Nature journal article supplement (doi:10.1038/s41589-021-00834-2), 2021-07-26
Supplement: 41589_2021_834_MOESM3_ESM.cif [file 41589_2021_834_MOESM3_ESM.cif]

data_fischerin_final

_audit_update_record
;
2021-03-08 # Formatted by publCIF

;

# publcif _publ_body_element loop start
loop_
_publ_body_element
_publ_body_title
_publ_body_contents

 section 
;
Introduction
; 
;

;
 section 
;
Experimental
; 
;

;
 subsection 
;
Synthesis and crystallization
; 
;

;
 subsection 
;
Refinement
;
;
Crystal data, data collection and structure refinement details are summarized
in Table 1.
;

 section 
;
Results and discussion
; 
;

;
# publcif _publ_body_element loop end
# start Validation Reply Form
_vrf_THETM01_fischerin_final
;
PROBLEM: The value of sine(theta_max)/wavelength is less than 0.550
RESPONSE: Data was truncated to a resolution of 1.05 angstrom due to poor
 diffraction data quality above this threshold. Of the four diffraction data
 sets merged, only one diffracted with reasonable R-meas values to 1.05
 angstrom, with the other three diffracting up to ranges 1.1-1.15.
;
_vrf_RINTA01_fischerin_final
;
PROBLEM: The value of Rint is greater than 0.12
RESPONSE: Electron diffraction data has higher R-factors compared to X-ray data.
 Four diffraction data sets were merged.
;
_vrf_PLAT029_fischerin_final
;
PROBLEM: _diffrn_measured_fraction_theta_full value Low . 0.865 Why?
RESPONSE: Full sampling of reciprocal space was hindered by the limited stage
 tilt of the electron microscope. The crystals also suffered from preferred
 orientation due to flat, plate-like morphology, as well as low symmetry (C2).
;
_vrf_PLAT089_fischerin_final
;
PROBLEM: Poor Data / Parameter Ratio (Zmax < 18) ........ 3.95 Note
RESPONSE: The structure has low symmetry and a very large number of non-hydrogen
 atoms to refine (191 atoms). The completeness of the data set is low due to
 limitations in stage rotation in MicroED and preferred orientation of the
 crystals due to their morphology.
;
_vrf_PLAT375_fischerin_final
;
PROBLEM: Strange C-O-H Geometry (C-O > 1.45 Ang) ..... O19# Check
RESPONSE: Diffraction data from four crystals were merged to obtain a desirable
 completeness, resulting in some structural disordering.
;
_vrf_PLAT410_fischerin_final
;
PROBLEM: Short Intra H...H Contact H17_2 ..H28A_2 . 1.79 Ang.
RESPONSE: Diffraction data from four crystals were merged to obtain a desirable
 completeness, resulting in some structural disordering. In addition, these
 hydrogens were placed using the riding model.
;
_vrf_PLAT414_fischerin_final
;
PROBLEM: Short Intra D-H..H-X H17_4 ..H29_4 1.76 Ang.
RESPONSE: Diffraction data from four crystals were merged to obtain a desirable
 completeness, resulting in some structural disordering. In addition, these
 hydrogens were placed using the riding model.
;
_vrf_PLAT415_fischerin_final
;
PROBLEM: Short Inter D-H..H-X H31_3 ..H27B_6 . 1.69 Ang.
RESPONSE: Diffraction data from four crystals were merged to obtain a desirable
 completeness, resulting in some structural disordering. In addition, these
 hydrogens were placed using the riding model.
;
_vrf_PLAT601_fischerin_final
;
PROBLEM: Unit Cell Contains Solvent Accessible VOIDS of . 214 Ang**3
RESPONSE: Diffraction data from four crystals were merged to obtain a desirable
 completeness, and we observed a high level of solvent disorder, whose atoms we
 could not unambiguously identify and place.
;
_vrf_PLAT084_fischerin_final
;
PROBLEM: High wR2 Value (i.e. > 0.25) ................... 0.36 Report
RESPONSE: Electron diffraction data has higher R-factors compared to X-ray data.
 Four diffraction data sets were merged.
;
_vrf_PLAT149_fischerin_final
;
PROBLEM: s.u. on the beta Angle is Too Large ....... 0.20 Degree
RESPONSE: Diffraction data from four crystals were merged to obtain a desirable
 completeness, and high levels of disorder was expected due to multiple
 rotatable bonds within a big unit cell consisting of multiple molecules.
;
_vrf_PLAT220_fischerin_final
;
PROBLEM: NonSolvent Resd 1 O Ueq(max)/Ueq(min) Range 7.0 Ratio 
RESPONSE: Diffraction data from four crystals were merged to obtain a desirable
 completeness, and high levels of disorder was expected due to multiple
 rotatable bonds within a big unit cell consisting of multiple molecules.
;
_vrf_PLAT241_fischerin_final
;
PROBLEM: High ?MainMol? Ueq as Compared to Neighbors of C27_6 Check
RESPONSE: Diffraction data from four crystals were merged to obtain a desirable
 completeness, resulting in some structural disordering.
;
_vrf_PLAT260_fischerin_final
;
PROBLEM: Large Average Ueq of Residue Including O05 0.559 Check
RESPONSE: Diffraction data from four crystals were merged to obtain a desirable
 completeness, and we observed a high level of solvent disorder, whose atoms we
 could not unambiguously identify and place. O05 is an oxygen we put in lieu of
 a solvent molecule.
;
_vrf_PLAT306_fischerin_final
;
PROBLEM: Isolated Oxygen Atom (H-atoms Missing ?) ....... O05 Check
RESPONSE: Diffraction data from four crystals were merged to obtain a desirable
 completeness, and we observed a high level of solvent disorder, whose atoms we
 could not unambiguously identify and place. O05 is an oxygen we put in lieu of
 a solvent molecule.
;
_vrf_PLAT340_fischerin_final
;
PROBLEM: Low Bond Precision on C-C Bonds ............... 0.04507 Ang.
RESPONSE: Diffraction data from four crystals were merged to obtain a desirable
 completeness, resulting in some structural disordering.
;
_vrf_PLAT363_fischerin_final
;
PROBLEM: Long C(sp3)-C(sp2) Bond C18_2 - C23_2 . 1.75 Ang.
RESPONSE: Diffraction data from four crystals were merged to obtain a desirable
 completeness, resulting in some structural disordering.
;
_vrf_PLAT369_fischerin_final
;
PROBLEM: Long C(sp2)-C(sp2) Bond C12_2 - C14_2 . 1.60 Ang.
RESPONSE: Diffraction data from four crystals were merged to obtain a desirable
 completeness, resulting in some structural disordering.
;
_vrf_PLAT417_fischerin_final
;
PROBLEM: Short Inter D-H..H-D H31_3 ..H31_4 . 1.90 Ang.
RESPONSE: Diffraction data from four crystals were merged to obtain a desirable
 completeness, resulting in some structural disordering. In addition, these
 hydrogens were placed using the riding model.
;
_vrf_PLAT420_fischerin_final
;
PROBLEM: D-H Without Acceptor O29_2 --H29_2 . Please Check
RESPONSE: Diffraction data from four crystals were merged to obtain a desirable
 completeness, and we observed a high level of solvent disorder. Presence of
 nearby solvent molecules was not observed.
;
_vrf_PLAT020_fischerin_final
;
PROBLEM: The Value of Rint is Greater Than 0.12 ......... 0.179 Report
RESPONSE: Electron diffraction data has higher R-factors compared to X-ray data.
 Four diffraction data sets were merged.
;
_vrf_PLAT036_fischerin_final
;
PROBLEM: No s.u. Given for Flack Parameter .............. Please Do !
RESPONSE: No reasonable Flack Parameter could be obtained from electron
 diffraction data.
;
_vrf_PLAT082_fischerin_final
;
PROBLEM: High R1 Value .................................. 0.14 Report
RESPONSE: Electron diffraction data has higher R-factors compared to X-ray data.
 Four diffraction data sets were merged.
;
_vrf_PLAT148_fischerin_final
;
PROBLEM: s.u. on the c - Axis is (Too) Large .... 0.200 Ang.
RESPONSE: Diffraction data from four crystals were merged to obtain a desirable
 completeness, resulting in some structural disordering.
;
_vrf_PLAT222_fischerin_final
;
PROBLEM: NonSolvent Resd 1 H Uiso(max)/Uiso(min) Range 5.8 Ratio
RESPONSE: Diffraction data from four crystals were merged to obtain a desirable
 completeness, and high levels of disorder was expected due to multiple
 rotatable bonds within a big unit cell consisting of multiple molecules.
;
_vrf_PLAT242_fischerin_final
;
PROBLEM: Low ?MainMol? Ueq as Compared to Neighbors of C23_1 Check
RESPONSE: Diffraction data from four crystals were merged to obtain a desirable
 completeness, resulting in some structural disordering.
;
_vrf_PLAT250_fischerin_final
;
PROBLEM: Large U3/U1 Ratio for Average U(i,j) Tensor .... 2.3 Note
RESPONSE: Diffraction data from four crystals were merged to obtain a desirable
 completeness, resulting in some structural disordering.
;
_vrf_PLAT303_fischerin_final
;
PROBLEM: Full Occupancy Atom H22_1 with # Connections 2.00 Check
RESPONSE: Diffraction data from four crystals were merged to obtain a desirable
 completeness, and we observed a high level of solvent disorder.
;
_vrf_PLAT309_fischerin_final
;
PROBLEM: Single Bonded Oxygen (C-O > 1.3 Ang) ........... O21_2 Check
RESPONSE: Diffraction data from four crystals were merged to obtain a desirable
 completeness, resulting in some structural disordering.
;
_vrf_PLAT313_fischerin_final
;
PROBLEM: Oxygen with Three Covalent Bonds (rare) ........ O01 Check
RESPONSE: Diffraction data from four crystals were merged to obtain a desirable
 completeness, and we observed a high level of solvent disorder.
;
_vrf_PLAT338_fischerin_final
;
PROBLEM: Small Aver Tau in Cyclohexane C23_3 -C28_3 34.40 Degree
RESPONSE: Diffraction data from four crystals were merged to obtain a desirable
 completeness, resulting in some structural disordering.
;
_vrf_PLAT360_fischerin_final
;
PROBLEM: Short C(sp3)-C(sp3) Bond C7_6 - C8_6 . 1.37 Ang.
RESPONSE: Diffraction data from four crystals were merged to obtain a desirable
 completeness, resulting in some structural disordering.
;
_vrf_PLAT362_fischerin_final
;
PROBLEM: Short C(sp3)-C(sp2) Bond C4_1 - C5_1 . 1.39 Ang.
RESPONSE: Diffraction data from four crystals were merged to obtain a desirable
 completeness, resulting in some structural disordering.
;
_vrf_PLAT413_fischerin_final
;
PROBLEM: Short Inter XH3 .. XHn H11B_6 ..H11B_6 . 2.10 Ang.
RESPONSE: Diffraction data from four crystals were merged to obtain a desirable
 completeness, resulting in some structural disordering.
;
_vrf_PLAT430_fischerin_final
;
PROBLEM: Short Inter D...A Contact O13_1 ..O13_3 . 2.85 Ang.
RESPONSE: Diffraction data from four crystals were merged to obtain a desirable
 completeness, resulting in some structural disordering.
;
_vrf_PLAT790_fischerin_final
;
PROBLEM: Centre of Gravity not Within Unit Cell: Resd. # 1 Note
RESPONSE: Center of gravity was not able to be moved due to crashing of 
 the GUI when attempted.
;
# end Validation Reply Form
 
_audit_creation_method            'SHELXL-2018/3'
_shelx_SHELXL_version_number      '2018/3'
_chemical_name_systematic         ?
_chemical_name_common             'fischerin'
_chemical_melting_point           ?
_chemical_formula_moiety          '4(C69 H87 N3 O22), 5(O)'
_chemical_formula_sum
 'C276 H348 N12 O93'  
_chemical_formula_weight          5321.81

loop_
 _atom_type_symbol
 _atom_type_description
 _atom_type_scat_dispersion_real
 _atom_type_scat_dispersion_imag
 _atom_type_scat_source
 'C'  'C'   0.0000   0.0000
 'International Tables Vol C Tables 4.2.6.8 and 6.1.1.4'
 'N'  'N'   0.0000   0.0000
 'International Tables Vol C Tables 4.2.6.8 and 6.1.1.4'
 'O'  'O'   0.0000   0.0000
 'International Tables Vol C Tables 4.2.6.8 and 6.1.1.4'
 'H'  'H'   0.0000   0.0000
 'International Tables Vol C Tables 4.2.6.8 and 6.1.1.4'
 
_space_group_crystal_system       monoclinic
_space_group_IT_number            5
_space_group_name_H-M_alt         'C 2'
_space_group_name_Hall            'C 2y'
 
_shelx_space_group_comment
;
The symmetry employed for this shelxl refinement is uniquely defined
by the following loop, which should always be used as a source of
symmetry information in preference to the above space-group names.
They are only intended as comments.
;
 
loop_
 _space_group_symop_operation_xyz
 'x, y, z'
 '-x, y, -z'
 'x+1/2, y+1/2, z'
 '-x+1/2, y+1/2, -z'
 
_cell_length_a                    36.59(2)
_cell_length_b                    20.800(9)
_cell_length_c                    18.9(2)
_cell_angle_alpha                 90
_cell_angle_beta                  96.3(2)
_cell_angle_gamma                 90
_cell_volume                      14266(3)
_cell_formula_units_Z             2
_cell_measurement_temperature     100(2)
_cell_measurement_reflns_used     11188
_cell_measurement_theta_min       0.040
_cell_measurement_theta_max       0.685
 
_exptl_crystal_description        'nano crystals'
_exptl_crystal_colour             'pale yellow'
_exptl_crystal_density_meas       ?
_exptl_crystal_density_method     ?
_exptl_crystal_density_diffrn     1.239          
_exptl_crystal_F_000              5664
_exptl_transmission_factor_min    ?
_exptl_transmission_factor_max    ?
_exptl_crystal_size_max           0.001
_exptl_crystal_size_mid           0.0007
_exptl_crystal_size_min           0.0005
_exptl_absorpt_coefficient_mu     0.000
_shelx_estimated_absorpt_T_min    ?
_shelx_estimated_absorpt_T_max    ?
_exptl_absorpt_correction_type    ?
_exptl_absorpt_correction_T_min   ?
_exptl_absorpt_correction_T_max   ?
_exptl_absorpt_process_details    ?
_exptl_absorpt_special_details    ?
_diffrn_ambient_temperature       100(2)
_diffrn_radiation_wavelength      0.0251
_diffrn_radiation_type            '200 keV electrons'
_diffrn_source                    'electron microscope FEG'
_diffrn_measurement_device_type   'Talos F200C'
_diffrn_measurement_method        'continuous rotation'
_diffrn_detector_area_resol_mean  32
_diffrn_reflns_number             52478
_diffrn_reflns_av_unetI/netI      0.1504
_diffrn_reflns_av_R_equivalents   0.1795
_diffrn_reflns_limit_h_min        -34
_diffrn_reflns_limit_h_max        34
_diffrn_reflns_limit_k_min        -19
_diffrn_reflns_limit_k_max        19
_diffrn_reflns_limit_l_min        -16
_diffrn_reflns_limit_l_max        16
_diffrn_reflns_theta_min          0.040
_diffrn_reflns_theta_max          0.685
_diffrn_reflns_theta_full         0.685
_diffrn_measured_fraction_theta_max   0.865
_diffrn_measured_fraction_theta_full  0.865
_diffrn_reflns_Laue_measured_fraction_max    0.865
_diffrn_reflns_Laue_measured_fraction_full   0.865
_diffrn_reflns_point_group_measured_fraction_max   0.868
_diffrn_reflns_point_group_measured_fraction_full  0.868
_reflns_number_total              11188
_reflns_number_gt                 5871
_reflns_threshold_expression      'I > 2\s(I)'
_reflns_Friedel_coverage          0.933
_reflns_Friedel_fraction_max      0.870
_reflns_Friedel_fraction_full     0.870
 
_reflns_special_details
;
 Reflections were merged by SHELXL according to the crystal
 class for the calculation of statistics and refinement.
 
 _reflns_Friedel_fraction is defined as the number of unique
 Friedel pairs measured divided by the number that would be
 possible theoretically, ignoring centric projections and
 systematic absences.
;
 
_computing_data_collection        Ceta-D
_computing_cell_refinement        'XSCALE XDS'
_computing_data_reduction         XDSCONV
_computing_structure_solution     'SHELXD 2013/2 (Sheldrick, 2013)'
_computing_structure_refinement 'SHELXL-2018/3 (Sheldrick, 2018)'
_computing_molecular_graphics     ShelxLe
_computing_publication_material   ?
_refine_special_details           ?
_refine_ls_structure_factor_coef  Fsqd
_refine_ls_matrix_type            full
_refine_ls_weighting_scheme       calc
_refine_ls_weighting_details
'w=1/[\s^2^(Fo^2^)+(0.2000P)^2^] where P=(Fo^2^+2Fc^2^)/3'
_atom_sites_solution_primary      direct
_atom_sites_solution_secondary    difmap
_atom_sites_solution_hydrogens    geom
_refine_ls_hydrogen_treatment     constr
_refine_ls_extinction_method      'SHELXL-2018/3 (Sheldrick 2018)'
_refine_ls_extinction_coef        29(4)
_refine_ls_extinction_expression
 'Fc^*^=kFc[1+0.001xFc^2^\l^3^/sin(2\q)]^-1/4^'
_refine_ls_abs_structure_details
;
 All f" are zero, so absolute structure could not be determined
;
_refine_ls_abs_structure_Flack    0
_chemical_absolute_configuration  syn
_refine_ls_number_reflns          11188
_refine_ls_number_parameters      1699
_refine_ls_number_restraints      4212
_refine_ls_R_factor_all           0.2006
_refine_ls_R_factor_gt            0.1373
_refine_ls_wR_factor_ref          0.3631
_refine_ls_wR_factor_gt           0.3098
_refine_ls_goodness_of_fit_ref    1.128
_refine_ls_restrained_S_all       1.007
_refine_ls_shift/su_max           0.001
_refine_ls_shift/su_mean          0.000
 
loop_
 _atom_site_label
 _atom_site_type_symbol
 _atom_site_fract_x
 _atom_site_fract_y
 _atom_site_fract_z
 _atom_site_U_iso_or_equiv
 _atom_site_adp_type
 _atom_site_occupancy
 _atom_site_site_symmetry_order  
 _atom_site_calc_flag
 _atom_site_refinement_flags_posn
 _atom_site_refinement_flags_adp
 _atom_site_refinement_flags_occupancy
 _atom_site_disorder_assembly
 _atom_site_disorder_group
O01 O 1.3223(3) 0.6526(6) 0.8174(11) 0.072(6) Uani 1 1 d . U . . .
O05 O 1.3494(16) 0.653(3) 1.259(9) 0.55(8) Uani 1 1 d . U . . .
O04 O 0.8027(11) 0.4956(15) 0.511(3) 0.24(3) Uani 1 1 d . U . . .
O03 O 1.000000 0.519(2) 0.500000 0.24(4) Uani 1 2 d S TU P . .
O02 O 0.9776(3) 0.6518(6) 0.6454(12) 0.072(6) Uani 1 1 d . U . . .
C1_1 C 1.2335(5) 0.6819(9) 0.9855(18) 0.111(7) Uani 1 1 d D U . . .
H1_1 H 1.252657 0.661208 0.961062 0.133 Uiso 1 1 calc R U . . .
C2_1 C 1.2473(5) 0.6885(10) 1.0654(18) 0.123(8) Uani 1 1 d D U . . .
H2_1 H 1.229963 0.717326 1.085616 0.148 Uiso 1 1 calc R U . . .
C3_1 C 1.2475(6) 0.6263(10) 1.1081(19) 0.130(8) Uani 1 1 d D U . . .
H3_1 H 1.259788 0.624222 1.153985 0.156 Uiso 1 1 calc R U . . .
C4_1 C 1.2292(6) 0.5728(12) 1.078(2) 0.134(8) Uani 1 1 d . U . . .
H4_1 H 1.232512 0.534197 1.102652 0.160 Uiso 1 1 calc R U . . .
C5_1 C 1.2067(6) 0.5719(10) 1.014(2) 0.127(8) Uani 1 1 d . U . . .
H5_1 H 1.183370 0.552106 1.023647 0.152 Uiso 1 1 calc R U . . .
C6_1 C 1.1972(5) 0.6380(10) 0.976(2) 0.122(8) Uani 1 1 d . U . . .
H6_1 H 1.179967 0.659062 1.005133 0.146 Uiso 1 1 calc R U . . .
C7_1 C 1.1770(6) 0.6351(11) 0.901(2) 0.129(8) Uani 1 1 d . U . . .
H7A_1 H 1.152407 0.619054 0.904124 0.155 Uiso 1 1 calc R U . . .
H7AB_1 H 1.174580 0.678773 0.882653 0.155 Uiso 1 1 calc R U . . .
C8_1 C 1.1940(7) 0.5947(12) 0.846(2) 0.151(9) Uani 1 1 d . U . . .
H8A_1 H 1.216486 0.614564 0.833450 0.182 Uiso 1 1 calc R U . . .
H8AB_1 H 1.177075 0.590639 0.802611 0.182 Uiso 1 1 calc R U . . .
C9_1 C 1.2028(8) 0.5253(15) 0.881(3) 0.160(10) Uani 1 1 d . U . . .
H9A_1 H 1.179673 0.503081 0.883420 0.192 Uiso 1 1 calc R U . . .
H9AB_1 H 1.216666 0.500735 0.849075 0.192 Uiso 1 1 calc R U . . .
C10_1 C 1.2248(7) 0.5262(12) 0.957(2) 0.148(9) Uani 1 1 d . U . . .
H10A_1 H 1.249592 0.540987 0.952722 0.177 Uiso 1 1 calc R U . . .
H10B_1 H 1.226398 0.482643 0.975169 0.177 Uiso 1 1 calc R U . . .
C11_1 C 1.2856(6) 0.7221(11) 1.077(2) 0.157(14) Uani 1 1 d D U . . .
H11A_1 H 1.296758 0.713652 1.124664 0.236 Uiso 1 1 calc R U . . .
H11B_1 H 1.282565 0.767572 1.070396 0.236 Uiso 1 1 calc R U . . .
H11C_1 H 1.301085 0.705587 1.043370 0.236 Uiso 1 1 calc R U . . .
C12_1 C 1.2254(5) 0.7462(10) 0.953(2) 0.120(7) Uani 1 1 d . U . . .
O13_1 O 1.2059(5) 0.7819(8) 0.9845(18) 0.125(10) Uani 1 1 d . U . . .
C14_1 C 1.2388(5) 0.7642(9) 0.8800(19) 0.108(7) Uani 1 1 d . U . . .
C15_1 C 1.2667(5) 0.7332(9) 0.853(2) 0.099(7) Uani 1 1 d . U . . .
N16_1 N 1.2752(5) 0.7524(9) 0.784(2) 0.110(7) Uani 1 1 d . U . . .
C17_1 C 1.2574(5) 0.8024(9) 0.7473(19) 0.113(8) Uani 1 1 d . U . . .
H17_1 H 1.265083 0.815459 0.704197 0.136 Uiso 1 1 calc R U . . .
C18_1 C 1.2281(6) 0.8335(11) 0.774(2) 0.114(7) Uani 1 1 d . U . . .
C19_1 C 1.2205(6) 0.8235(11) 0.845(2) 0.116(8) Uani 1 1 d . U . . .
O20_1 O 1.1966(5) 0.8560(8) 0.8706(18) 0.129(10) Uani 1 1 d . U . . .
H20_1 H 1.194381 0.843762 0.911230 0.193 Uiso 1 1 calc R U . . .
O21_1 O 1.2871(4) 0.6876(8) 0.8808(15) 0.102(7) Uani 1 1 d . U . . .
O22_1 O 1.3037(5) 0.7252(9) 0.7553(17) 0.117(9) Uani 1 1 d . U . . .
H22_1 H 1.312598 0.696528 0.781548 0.176 Uiso 1 1 calc R U . . .
C23_1 C 1.2055(5) 0.8893(10) 0.7331(18) 0.136(9) Uani 1 1 d D U . . .
C24_1 C 1.2207(6) 0.9545(10) 0.7625(18) 0.162(10) Uani 1 1 d D U . . .
H24_1 H 1.211541 0.968277 0.806964 0.194 Uiso 1 1 calc R U . . .
C25_1 C 1.2313(8) 1.0078(11) 0.7160(17) 0.173(11) Uani 1 1 d D U . . .
H25_1 H 1.228024 1.052090 0.731834 0.207 Uiso 1 1 calc R U . . .
C26_1 C 1.2342(8) 0.9959(12) 0.6358(18) 0.185(12) Uani 1 1 d D U . . .
H26_1 H 1.210168 1.005467 0.609717 0.222 Uiso 1 1 calc R U . . .
C27_1 C 1.2417(8) 0.9230(12) 0.627(2) 0.187(12) Uani 1 1 d D U . . .
H27A_1 H 1.264475 0.911096 0.655089 0.224 Uiso 1 1 calc R U . . .
H27B_1 H 1.244221 0.913571 0.577126 0.224 Uiso 1 1 calc R U . . .
C28_1 C 1.2085(7) 0.8834(12) 0.6520(18) 0.160(10) Uani 1 1 d D U . . .
H28A_1 H 1.185800 0.898427 0.625913 0.192 Uiso 1 1 calc R U . . .
H28B_1 H 1.211485 0.838464 0.640137 0.192 Uiso 1 1 calc R U . . .
O29_1 O 1.1675(5) 0.8861(17) 0.748(2) 0.205(15) Uani 1 1 d D U . . .
H29_1 H 1.158016 0.853030 0.730803 0.307 Uiso 1 1 calc R U . . .
O30_1 O 1.2583(6) 0.9673(12) 0.758(2) 0.172(11) Uani 1 1 d D U . . .
O31_1 O 1.2600(8) 1.0382(14) 0.611(2) 0.205(16) Uani 1 1 d D U . . .
H31_1 H 1.260482 1.032664 0.567664 0.307 Uiso 1 1 calc R U . . .
C1_2 C 1.3979(5) 0.7880(9) 0.9810(18) 0.114(7) Uani 1 1 d D U . . .
H1_2 H 1.376043 0.765498 0.958727 0.137 Uiso 1 1 calc R U . . .
C2_2 C 1.4046(7) 0.7716(9) 1.0606(19) 0.133(8) Uani 1 1 d D U . . .
H2_2 H 1.429456 0.786335 1.077851 0.159 Uiso 1 1 calc R U . . .
C3_2 C 1.3782(6) 0.8029(11) 1.107(2) 0.140(8) Uani 1 1 d D U . . .
H3_2 H 1.376412 0.787429 1.152860 0.168 Uiso 1 1 calc R U . . .
C4_2 C 1.3560(6) 0.8566(12) 1.080(2) 0.137(8) Uani 1 1 d . U . . .
H4_2 H 1.340606 0.876636 1.109275 0.164 Uiso 1 1 calc R U . . .
C5_2 C 1.3572(4) 0.8816(9) 1.0035(17) 0.113(7) Uani 1 1 d D U . . .
H5_2 H 1.359218 0.928289 1.009371 0.135 Uiso 1 1 calc R U . . .
C6_2 C 1.3929(5) 0.8627(9) 0.9728(17) 0.118(7) Uani 1 1 d D U . . .
H6_2 H 1.413275 0.883028 1.002748 0.142 Uiso 1 1 calc R U . . .
C7_2 C 1.3948(5) 0.8860(11) 0.8954(17) 0.135(8) Uani 1 1 d D U . . .
H7A_2 H 1.415106 0.864982 0.875722 0.162 Uiso 1 1 calc R U . . .
H7AB_2 H 1.399065 0.931994 0.895193 0.162 Uiso 1 1 calc R U . . .
C8_2 C 1.3577(5) 0.8698(11) 0.8486(18) 0.144(9) Uani 1 1 d D U . . .
H8A_2 H 1.358942 0.886239 0.800812 0.173 Uiso 1 1 calc R U . . .
H8AB_2 H 1.355193 0.823405 0.845157 0.173 Uiso 1 1 calc R U . . .
C9_2 C 1.3236(6) 0.8973(10) 0.8774(18) 0.134(9) Uani 1 1 d D U . . .
H9A_2 H 1.301775 0.884238 0.846954 0.161 Uiso 1 1 calc R U . . .
H9AB_2 H 1.324792 0.943859 0.877446 0.161 Uiso 1 1 calc R U . . .
C10_2 C 1.3217(5) 0.8727(11) 0.9533(17) 0.130(8) Uani 1 1 d D U . . .
H10A_2 H 1.315524 0.827323 0.951087 0.156 Uiso 1 1 calc R U . . .
H10B_2 H 1.301885 0.894966 0.973315 0.156 Uiso 1 1 calc R U . . .
C11_2 C 1.4034(7) 0.6971(9) 1.074(2) 0.144(12) Uani 1 1 d D U . . .
H11A_2 H 1.404547 0.688879 1.124144 0.216 Uiso 1 1 calc R U . . .
H11B_2 H 1.423931 0.676973 1.055225 0.216 Uiso 1 1 calc R U . . .
H11C_2 H 1.380910 0.679812 1.050288 0.216 Uiso 1 1 calc R U . . .
C12_2 C 1.4318(5) 0.7638(10) 0.952(2) 0.121(7) Uani 1 1 d . U . . .
O13_2 O 1.4617(5) 0.7818(10) 0.973(2) 0.154(13) Uani 1 1 d . U . . .
C14_2 C 1.4278(4) 0.7273(7) 0.8768(10) 0.112(7) Uani 1 1 d G U . . .
C15_2 C 1.3948(3) 0.6996(7) 0.8483(11) 0.108(7) Uani 1 1 d G U . . .
N16_2 N 1.3927(3) 0.6679(7) 0.7831(11) 0.130(8) Uani 1 1 d G U . . .
C17_2 C 1.4235(4) 0.6639(8) 0.7464(11) 0.145(9) Uani 1 1 d G U . . .
H17_2 H 1.422084 0.642676 0.702797 0.173 Uiso 1 1 calc R U . . .
C18_2 C 1.4565(3) 0.6916(8) 0.7749(12) 0.146(8) Uani 1 1 d G U . . .
C19_2 C 1.4586(3) 0.7233(7) 0.8401(12) 0.127(8) Uani 1 1 d G U . . .
O20_2 O 1.4914(5) 0.7409(10) 0.8710(19) 0.146(11) Uani 1 1 d . U . . .
H20_2 H 1.489078 0.758914 0.908937 0.219 Uiso 1 1 calc R U . . .
O21_2 O 1.3624(4) 0.6966(7) 0.8778(15) 0.104(8) Uani 1 1 d . U . . .
O22_2 O 1.3608(5) 0.6412(9) 0.7490(17) 0.129(9) Uani 1 1 d . U . . .
H22_2 H 1.343854 0.646642 0.773448 0.194 Uiso 1 1 calc R U . . .
C23_2 C 1.4926(7) 0.6912(12) 0.721(2) 0.204(11) Uani 1 1 d D U . . .
C24_2 C 1.5194(8) 0.6448(13) 0.768(2) 0.241(14) Uani 1 1 d D U . . .
H24_2 H 1.528682 0.658663 0.815881 0.289 Uiso 1 1 calc R U . . .
C25_2 C 1.5435(10) 0.6026(19) 0.728(3) 0.313(18) Uani 1 1 d D U . . .
H25_2 H 1.567120 0.590012 0.754024 0.376 Uiso 1 1 calc R U . . .
C26_2 C 1.5364(14) 0.582(2) 0.649(3) 0.39(2) Uani 1 1 d D U . . .
H26_2 H 1.557825 0.596594 0.625862 0.468 Uiso 1 1 calc R U . . .
C27_2 C 1.5021(14) 0.616(3) 0.608(3) 0.35(2) Uani 1 1 d D U . . .
H27A_2 H 1.510439 0.649943 0.577767 0.424 Uiso 1 1 calc R U . . .
H27B_2 H 1.488155 0.585530 0.577553 0.424 Uiso 1 1 calc R U . . .
C28_2 C 1.4772(10) 0.646(2) 0.659(3) 0.301(17) Uani 1 1 d D U . . .
H28A_2 H 1.464853 0.610884 0.680194 0.361 Uiso 1 1 calc R U . . .
H28B_2 H 1.458310 0.670160 0.630017 0.361 Uiso 1 1 calc R U . . .
O29_2 O 1.5067(9) 0.7559(11) 0.721(3) 0.24(2) Uani 1 1 d D U . . .
H29_2 H 1.490782 0.780055 0.702613 0.364 Uiso 1 1 calc R U . . .
O30_2 O 1.5098(13) 0.5776(13) 0.757(3) 0.295(18) Uani 1 1 d D U . . .
O31_2 O 1.536(2) 0.510(2) 0.643(4) 0.50(4) Uani 1 1 d D U . . .
H31_2 H 1.533320 0.499885 0.600525 0.755 Uiso 1 1 calc R U . . .
C1_3 C 1.3701(5) 0.4883(10) 0.984(2) 0.109(7) Uani 1 1 d . U . . .
H1_3 H 1.369027 0.530788 0.961903 0.131 Uiso 1 1 calc R U . . .
C2_3 C 1.3656(5) 0.4960(11) 1.062(2) 0.115(8) Uani 1 1 d . U . . .
H2_3 H 1.363394 0.452385 1.080496 0.139 Uiso 1 1 calc R U . . .
C3_3 C 1.3998(6) 0.5238(10) 1.102(2) 0.133(8) Uani 1 1 d . U . . .
H3_3 H 1.397712 0.541383 1.146491 0.159 Uiso 1 1 calc R U . . .
C4_3 C 1.4327(6) 0.5255(10) 1.079(2) 0.120(8) Uani 1 1 d . U . . .
H4_3 H 1.452673 0.541769 1.108045 0.144 Uiso 1 1 calc R U . . .
C5_3 C 1.4382(5) 0.5009(10) 1.0044(18) 0.120(7) Uani 1 1 d D U . . .
H5_3 H 1.460679 0.474840 1.010426 0.144 Uiso 1 1 calc R U . . .
C6_3 C 1.4073(5) 0.4553(9) 0.9719(18) 0.116(7) Uani 1 1 d D U . . .
H6_3 H 1.409078 0.416455 1.001524 0.140 Uiso 1 1 calc R U . . .
C7_3 C 1.4106(6) 0.4330(12) 0.8960(17) 0.129(8) Uani 1 1 d D U . . .
H7A_3 H 1.388474 0.409980 0.878019 0.155 Uiso 1 1 calc R U . . .
H7AB_3 H 1.431172 0.403485 0.896377 0.155 Uiso 1 1 calc R U . . .
C8_3 C 1.4164(5) 0.4897(9) 0.8455(17) 0.129(8) Uani 1 1 d D U . . .
H8A_3 H 1.394504 0.516178 0.840354 0.155 Uiso 1 1 calc R U . . .
H8AB_3 H 1.420014 0.472886 0.798801 0.155 Uiso 1 1 calc R U . . .
C9_3 C 1.4503(5) 0.5323(11) 0.8733(18) 0.130(9) Uani 1 1 d D U . . .
H9A_3 H 1.472916 0.508124 0.872784 0.157 Uiso 1 1 calc R U . . .
H9AB_3 H 1.451513 0.569903 0.843135 0.157 Uiso 1 1 calc R U . . .
C10_3 C 1.4450(5) 0.5528(10) 0.9501(16) 0.121(8) Uani 1 1 d D U . . .
H10A_3 H 1.466747 0.576592 0.968988 0.145 Uiso 1 1 calc R U . . .
H10B_3 H 1.424475 0.582473 0.947449 0.145 Uiso 1 1 calc R U . . .
C11_3 C 1.3322(6) 0.5325(11) 1.082(2) 0.149(13) Uani 1 1 d . U . . .
H11A_3 H 1.335974 0.577787 1.076687 0.223 Uiso 1 1 calc R U . . .
H11B_3 H 1.328690 0.523160 1.130646 0.223 Uiso 1 1 calc R U . . .
H11C_3 H 1.310757 0.519396 1.051328 0.223 Uiso 1 1 calc R U . . .
C12_3 C 1.3362(5) 0.4445(10) 0.947(2) 0.121(7) Uani 1 1 d . U . . .
O13_3 O 1.3337(5) 0.3930(11) 0.9790(19) 0.140(11) Uani 1 1 d . U . . .
C14_3 C 1.3125(5) 0.4601(9) 0.880(2) 0.118(7) Uani 1 1 d . U . . .
C15_3 C 1.3133(5) 0.5290(10) 0.848(2) 0.108(7) Uani 1 1 d . U . . .
N16_3 N 1.2911(5) 0.5332(10) 0.787(2) 0.119(7) Uani 1 1 d . U . . .
C17_3 C 1.2685(6) 0.4911(10) 0.751(2) 0.140(9) Uani 1 1 d . U . . .
H17_3 H 1.253921 0.502945 0.709429 0.168 Uiso 1 1 calc R U . . .
C18_3 C 1.2676(6) 0.4231(11) 0.780(2) 0.133(8) Uani 1 1 d . U . . .
C19_3 C 1.2901(6) 0.4130(11) 0.842(2) 0.131(8) Uani 1 1 d . U . . .
O20_3 O 1.2889(4) 0.3539(8) 0.8759(19) 0.138(11) Uani 1 1 d . U . . .
H20_3 H 1.303437 0.354020 0.912306 0.208 Uiso 1 1 calc R U . . .
O21_3 O 1.3308(4) 0.5763(8) 0.8734(15) 0.105(8) Uani 1 1 d . U . . .
O22_3 O 1.2894(4) 0.5967(9) 0.7540(17) 0.122(9) Uani 1 1 d . U . . .
H22_3 H 1.303551 0.620949 0.777605 0.183 Uiso 1 1 calc R U . . .
C23_3 C 1.2410(6) 0.3751(11) 0.7429(16) 0.158(8) Uani 1 1 d D U . . .
C24_3 C 1.2110(9) 0.4064(17) 0.6893(19) 0.204(12) Uani 1 1 d D U . . .
H24_3 H 1.193687 0.435536 0.709056 0.244 Uiso 1 1 calc R U . . .
C25_3 C 1.1986(9) 0.3761(15) 0.619(2) 0.238(14) Uani 1 1 d D U . . .
H25_3 H 1.173895 0.387025 0.596943 0.285 Uiso 1 1 calc R U . . .
C26_3 C 1.2142(11) 0.3085(16) 0.601(2) 0.256(17) Uani 1 1 d D U . . .
H26_3 H 1.192882 0.280525 0.588845 0.308 Uiso 1 1 calc R U . . .
C27_3 C 1.2380(9) 0.2755(15) 0.664(2) 0.228(15) Uani 1 1 d D U . . .
H27A_3 H 1.253344 0.243073 0.644688 0.274 Uiso 1 1 calc R U . . .
H27B_3 H 1.222032 0.253979 0.693861 0.274 Uiso 1 1 calc R U . . .
C28_3 C 1.2629(6) 0.3239(14) 0.709(2) 0.178(12) Uani 1 1 d D U . . .
H28A_3 H 1.277761 0.300728 0.746508 0.213 Uiso 1 1 calc R U . . .
H28B_3 H 1.279333 0.344463 0.679214 0.213 Uiso 1 1 calc R U . . .
O29_3 O 1.2165(7) 0.3496(12) 0.7927(19) 0.193(12) Uani 1 1 d D U . . .
H29_3 H 1.228866 0.332459 0.826439 0.290 Uiso 1 1 calc R U . . .
O30_3 O 1.2259(11) 0.4270(17) 0.625(2) 0.234(14) Uani 1 1 d D U . . .
O31_3 O 1.2324(19) 0.315(4) 0.537(3) 0.36(3) Uani 1 1 d D U . . .
H31_3 H 1.218126 0.330876 0.505291 0.541 Uiso 1 1 calc R U . . .
C1_4 C 1.0598(6) 0.7881(9) 0.807(2) 0.122(8) Uani 1 1 d D U . . .
H1_4 H 1.036255 0.772730 0.783456 0.146 Uiso 1 1 calc R U . . .
C2_4 C 1.0603(7) 0.7681(13) 0.886(2) 0.138(9) Uani 1 1 d D U . . .
H2_4 H 1.084564 0.779619 0.910181 0.166 Uiso 1 1 calc R U . . .
C3_4 C 1.0348(7) 0.8088(15) 0.912(2) 0.154(10) Uani 1 1 d . U . . .
H3_4 H 1.027997 0.796558 0.956122 0.185 Uiso 1 1 calc R U . . .
C4_4 C 1.0183(7) 0.8617(15) 0.886(3) 0.148(9) Uani 1 1 d . U . . .
H4_4 H 1.001350 0.881206 0.912422 0.177 Uiso 1 1 calc R U . . .
C5_4 C 1.0246(5) 0.8906(13) 0.8204(19) 0.135(8) Uani 1 1 d D U . . .
H5_4 H 1.028462 0.936704 0.828674 0.162 Uiso 1 1 calc R U . . .
C6_4 C 1.0598(5) 0.8626(9) 0.7949(18) 0.126(8) Uani 1 1 d D U . . .
H6_4 H 1.080501 0.880043 0.826429 0.151 Uiso 1 1 calc R U . . .
C7_4 C 1.0646(7) 0.8859(15) 0.7186(18) 0.156(10) Uani 1 1 d D U . . .
H7A_4 H 1.071821 0.930723 0.720501 0.187 Uiso 1 1 calc R U . . .
H7AB_4 H 1.084185 0.861474 0.700680 0.187 Uiso 1 1 calc R U . . .
C8_4 C 1.0301(7) 0.8787(13) 0.6676(19) 0.154(9) Uani 1 1 d D U . . .
H8A_4 H 1.034189 0.899294 0.623057 0.185 Uiso 1 1 calc R U . . .
H8AB_4 H 1.026333 0.833225 0.657720 0.185 Uiso 1 1 calc R U . . .
C9_4 C 0.9956(7) 0.9049(13) 0.691(2) 0.160(10) Uani 1 1 d D U . . .
H9A_4 H 0.974862 0.891129 0.657654 0.191 Uiso 1 1 calc R U . . .
H9AB_4 H 0.996465 0.951535 0.689820 0.191 Uiso 1 1 calc R U . . .
C10_4 C 0.9904(6) 0.8819(14) 0.7661(18) 0.149(9) Uani 1 1 d D U . . .
H10A_4 H 0.983737 0.836760 0.764096 0.178 Uiso 1 1 calc R U . . .
H10B_4 H 0.970098 0.905429 0.782807 0.178 Uiso 1 1 calc R U . . .
C11_4 C 1.0554(9) 0.6977(13) 0.896(2) 0.169(14) Uani 1 1 d . U . . .
H11A_4 H 1.048359 0.677767 0.850804 0.253 Uiso 1 1 calc R U . . .
H11B_4 H 1.036475 0.690648 0.926884 0.253 Uiso 1 1 calc R U . . .
H11C_4 H 1.078014 0.679250 0.917466 0.253 Uiso 1 1 calc R U . . .
C12_4 C 1.0909(6) 0.7538(12) 0.766(2) 0.129(8) Uani 1 1 d . U . . .
O13_4 O 1.1235(6) 0.7687(12) 0.794(2) 0.157(12) Uani 1 1 d . U . . .
C14_4 C 1.0855(4) 0.7144(8) 0.7019(11) 0.132(8) Uani 1 1 d G U . . .
C15_4 C 1.0516(4) 0.6886(8) 0.6763(12) 0.127(8) Uani 1 1 d G U . . .
N16_4 N 1.0480(3) 0.6523(8) 0.6140(12) 0.127(8) Uani 1 1 d G U . . .
C17_4 C 1.0784(5) 0.6419(9) 0.5773(11) 0.146(10) Uani 1 1 d G U . . .
H17_4 H 1.075987 0.617675 0.535615 0.175 Uiso 1 1 calc R U . . .
C18_4 C 1.1123(4) 0.6678(10) 0.6029(13) 0.165(10) Uani 1 1 d G U . . .
C19_4 C 1.1159(3) 0.7040(9) 0.6652(13) 0.144(9) Uani 1 1 d G U . . .
O20_4 O 1.1516(6) 0.7211(13) 0.693(2) 0.172(13) Uani 1 1 d . U . . .
H20_4 H 1.150830 0.741530 0.730081 0.258 Uiso 1 1 calc R U . . .
O21_4 O 1.0192(5) 0.6907(7) 0.7068(16) 0.112(8) Uani 1 1 d . U . . .
O22_4 O 1.0154(6) 0.6263(10) 0.5833(18) 0.129(9) Uani 1 1 d . U . . .
H22_4 H 0.998749 0.636082 0.606946 0.193 Uiso 1 1 calc R U . . .
C23_4 C 1.1480(6) 0.6434(12) 0.5605(16) 0.154(8) Uani 1 1 d D U . . .
C24_4 C 1.1526(7) 0.6986(12) 0.509(2) 0.170(10) Uani 1 1 d D U . . .
H24_4 H 1.134083 0.701574 0.467825 0.204 Uiso 1 1 calc R U . . .
C25_4 C 1.1915(6) 0.7172(14) 0.4967(19) 0.186(11) Uani 1 1 d D U . . .
H25_4 H 1.195754 0.730811 0.448575 0.223 Uiso 1 1 calc R U . . .
C26_4 C 1.2239(7) 0.6914(18) 0.545(2) 0.216(14) Uani 1 1 d D U . . .
H26_4 H 1.231634 0.652509 0.521062 0.259 Uiso 1 1 calc R U . . .
C27_4 C 1.2152(7) 0.6692(18) 0.621(2) 0.212(14) Uani 1 1 d D U . . .
H27A_4 H 1.236684 0.649055 0.646363 0.254 Uiso 1 1 calc R U . . .
H27B_4 H 1.208410 0.705894 0.648294 0.254 Uiso 1 1 calc R U . . .
C28_4 C 1.1831(6) 0.6208(13) 0.611(2) 0.191(12) Uani 1 1 d D U . . .
H28A_4 H 1.175653 0.610758 0.657213 0.229 Uiso 1 1 calc R U . . .
H28B_4 H 1.192109 0.581321 0.591374 0.229 Uiso 1 1 calc R U . . .
O29_4 O 1.1356(7) 0.5875(13) 0.516(2) 0.207(16) Uani 1 1 d D U . . .
H29_4 H 1.115258 0.594774 0.495332 0.310 Uiso 1 1 calc R U . . .
O30_4 O 1.1676(8) 0.7574(12) 0.536(2) 0.187(12) Uani 1 1 d D U . . .
O31_4 O 1.2560(8) 0.734(2) 0.552(3) 0.27(3) Uani 1 1 d D U . . .
H31_4 H 1.251551 0.766202 0.528095 0.410 Uiso 1 1 calc R U . . .
C1_5 C 0.8851(5) 0.6936(10) 0.807(2) 0.124(8) Uani 1 1 d . U . . .
H1_5 H 0.903212 0.669312 0.782948 0.149 Uiso 1 1 calc R U . . .
C2_5 C 0.8995(7) 0.7033(16) 0.891(3) 0.174(11) Uani 1 1 d D U . . .
H2_5 H 0.883905 0.734167 0.912946 0.209 Uiso 1 1 calc R U . . .
C3_5 C 0.8982(7) 0.6392(15) 0.926(3) 0.169(10) Uani 1 1 d . U . . .
H3_5 H 0.911776 0.633521 0.970755 0.203 Uiso 1 1 calc R U . . .
C4_5 C 0.8775(7) 0.5869(15) 0.896(2) 0.147(9) Uani 1 1 d . U . . .
H4_5 H 0.879497 0.548456 0.921360 0.176 Uiso 1 1 calc R U . . .
C5_5 C 0.8549(6) 0.5869(10) 0.8332(19) 0.139(8) Uani 1 1 d D U . . .
H5_5 H 0.831485 0.567318 0.842292 0.166 Uiso 1 1 calc R U . . .
C6_5 C 0.8463(6) 0.6557(10) 0.8003(18) 0.140(8) Uani 1 1 d D U . . .
H6_5 H 0.831197 0.677585 0.832652 0.168 Uiso 1 1 calc R U . . .
C7_5 C 0.8238(6) 0.6567(12) 0.7263(17) 0.146(9) Uani 1 1 d D U . . .
H7A_5 H 0.823553 0.699765 0.706595 0.175 Uiso 1 1 calc R U . . .
H7AB_5 H 0.798675 0.643774 0.730323 0.175 Uiso 1 1 calc R U . . .
C8_5 C 0.8419(7) 0.6095(11) 0.677(2) 0.160(9) Uani 1 1 d D U . . .
H8A_5 H 0.826476 0.606456 0.631935 0.193 Uiso 1 1 calc R U . . .
H8AB_5 H 0.865475 0.626773 0.667587 0.193 Uiso 1 1 calc R U . . .
C9_5 C 0.8477(8) 0.5414(12) 0.709(2) 0.166(10) Uani 1 1 d D U . . .
H9A_5 H 0.824069 0.523262 0.716975 0.199 Uiso 1 1 calc R U . . .
H9AB_5 H 0.858551 0.514099 0.675381 0.199 Uiso 1 1 calc R U . . .
C10_5 C 0.8729(6) 0.5427(12) 0.7801(18) 0.147(9) Uani 1 1 d D U . . .
H10A_5 H 0.896956 0.559190 0.772508 0.176 Uiso 1 1 calc R U . . .
H10B_5 H 0.875894 0.499595 0.799462 0.176 Uiso 1 1 calc R U . . .
C11_5 C 0.9413(7) 0.7272(18) 0.900(3) 0.200(18) Uani 1 1 d D U . . .
H11A_5 H 0.950414 0.728856 0.949348 0.301 Uiso 1 1 calc R U . . .
H11B_5 H 0.942643 0.769284 0.879150 0.301 Uiso 1 1 calc R U . . .
H11C_5 H 0.956002 0.697866 0.875546 0.301 Uiso 1 1 calc R U . . .
O13_5 O 0.8602(5) 0.7969(8) 0.8018(18) 0.120(9) Uani 1 1 d . U . . .
C14_5 C 0.8951(5) 0.7777(9) 0.706(2) 0.108(7) Uani 1 1 d . U . . .
C15_5 C 0.9251(6) 0.7408(11) 0.680(2) 0.106(7) Uani 1 1 d . U . . .
N16_5 N 0.9354(6) 0.7586(11) 0.614(2) 0.118(7) Uani 1 1 d . U . . .
C17_5 C 0.9217(6) 0.8107(11) 0.579(2) 0.135(9) Uani 1 1 d . U . . .
H17_5 H 0.931562 0.821802 0.537703 0.162 Uiso 1 1 calc R U . . .
C18_5 C 0.8934(7) 0.8512(12) 0.601(2) 0.144(8) Uani 1 1 d D U . . .
C19_5 C 0.8815(7) 0.8335(13) 0.670(2) 0.137(8) Uani 1 1 d . U . . .
O20_5 O 0.8576(5) 0.8714(10) 0.701(2) 0.151(11) Uani 1 1 d . U . . .
H20_5 H 0.852920 0.855255 0.738229 0.227 Uiso 1 1 calc R U . . .
C20_5 C 0.8798(6) 0.7594(11) 0.774(2) 0.129(8) Uani 1 1 d . U . . .
O21_5 O 0.9412(5) 0.6933(9) 0.7054(15) 0.099(7) Uani 1 1 d . U . . .
O22_5 O 0.9625(5) 0.7220(10) 0.5841(18) 0.131(10) Uani 1 1 d . U . . .
H22_5 H 0.967171 0.689773 0.608405 0.197 Uiso 1 1 calc R U . . .
C23_5 C 0.8770(7) 0.9115(11) 0.5569(18) 0.172(9) Uani 1 1 d D U . . .
C24_5 C 0.8837(9) 0.9699(12) 0.607(2) 0.198(12) Uani 1 1 d D U . . .
H24_5 H 0.868448 0.971740 0.646370 0.238 Uiso 1 1 calc R U . . .
C25_5 C 0.8911(11) 1.0323(13) 0.574(2) 0.224(14) Uani 1 1 d D U . . .
H25_5 H 0.880769 1.070006 0.595566 0.268 Uiso 1 1 calc R U . . .
C27_5 C 0.8865(12) 0.9789(15) 0.445(2) 0.243(15) Uani 1 1 d D U . . .
H27A_5 H 0.860432 0.978173 0.428507 0.291 Uiso 1 1 calc R U . . .
H27B_5 H 0.899988 0.980231 0.403116 0.291 Uiso 1 1 calc R U . . .
C26_5 C 0.8961(11) 1.0386(15) 0.493(2) 0.247(16) Uani 1 1 d D U . . .
H26_5 H 0.879723 1.073316 0.473697 0.296 Uiso 1 1 calc R U . . .
O29_5 O 0.8391(6) 0.9041(14) 0.531(2) 0.209(17) Uani 1 1 d D U . . .
H29_5 H 0.836279 0.871048 0.507754 0.314 Uiso 1 1 calc R U . . .
O30_5 O 0.9189(10) 0.9962(19) 0.621(3) 0.244(15) Uani 1 1 d D U . . .
C28_5 C 0.8972(10) 0.9199(15) 0.489(2) 0.201(12) Uani 1 1 d D U . . .
H28A_5 H 0.923475 0.921447 0.503415 0.241 Uiso 1 1 calc R U . . .
H28B_5 H 0.892428 0.882203 0.459050 0.241 Uiso 1 1 calc R U . . .
O31_5 O 0.9331(13) 1.061(2) 0.488(4) 0.33(3) Uani 1 1 d D U . . .
H31_5 H 0.936939 1.093305 0.511687 0.492 Uiso 1 1 calc R U . . .
C1_6 C 1.0194(5) 0.4762(12) 0.801(2) 0.132(9) Uani 1 1 d . U . . .
H1_6 H 1.020045 0.516937 0.774759 0.159 Uiso 1 1 calc R U . . .
C2_6 C 1.0159(6) 0.4876(14) 0.881(3) 0.157(10) Uani 1 1 d D U . . .
H2_6 H 1.011362 0.446125 0.902449 0.188 Uiso 1 1 calc R U . . .
C3_6 C 1.0522(7) 0.5134(14) 0.915(2) 0.171(11) Uani 1 1 d D U . . .
H3_6 H 1.051867 0.533521 0.959333 0.205 Uiso 1 1 calc R U . . .
C4_6 C 1.0850(9) 0.5104(17) 0.889(3) 0.175(11) Uani 1 1 d D U . . .
H4_6 H 1.105382 0.530138 0.913897 0.210 Uiso 1 1 calc R U . . .
C5_6 C 1.0888(7) 0.4770(14) 0.824(3) 0.155(9) Uani 1 1 d . U . . .
H5_6 H 1.109915 0.448001 0.832664 0.187 Uiso 1 1 calc R U . . .
C6_6 C 1.0546(6) 0.4356(13) 0.795(2) 0.141(9) Uani 1 1 d . U . . .
H6_6 H 1.053654 0.398085 0.825650 0.170 Uiso 1 1 calc R U . . .
C7_6 C 1.0584(7) 0.4110(13) 0.719(2) 0.148(10) Uani 1 1 d . U . . .
H7A_6 H 1.077671 0.378883 0.722437 0.178 Uiso 1 1 calc R U . . .
H7AB_6 H 1.035599 0.389672 0.701457 0.178 Uiso 1 1 calc R U . . .
C8_6 C 1.0660(6) 0.4560(14) 0.670(2) 0.156(10) Uani 1 1 d . U . . .
H8A_6 H 1.044636 0.483490 0.660474 0.188 Uiso 1 1 calc R U . . .
H8AB_6 H 1.069221 0.433637 0.625937 0.188 Uiso 1 1 calc R U . . .
C9_6 C 1.1001(8) 0.4997(16) 0.689(3) 0.175(11) Uani 1 1 d . U . . .
H9A_6 H 1.122582 0.474838 0.689397 0.210 Uiso 1 1 calc R U . . .
H9AB_6 H 1.100616 0.533904 0.654103 0.210 Uiso 1 1 calc R U . . .
C10_6 C 1.0971(6) 0.5272(15) 0.761(3) 0.157(10) Uani 1 1 d . U . . .
H10A_6 H 1.077600 0.559142 0.756578 0.188 Uiso 1 1 calc R U . . .
H10B_6 H 1.119814 0.549555 0.776688 0.188 Uiso 1 1 calc R U . . .
C11_6 C 0.9846(8) 0.5362(18) 0.898(3) 0.213(18) Uani 1 1 d D U . . .
H11A_6 H 0.987736 0.576419 0.874268 0.319 Uiso 1 1 calc R U . . .
H11B_6 H 0.986142 0.543019 0.948377 0.319 Uiso 1 1 calc R U . . .
H11C_6 H 0.960976 0.518451 0.881173 0.319 Uiso 1 1 calc R U . . .
C12_6 C 0.9852(6) 0.4356(11) 0.773(2) 0.125(8) Uani 1 1 d . U . . .
O13_6 O 0.9790(6) 0.3854(11) 0.800(2) 0.147(11) Uani 1 1 d . U . . .
C14_6 C 0.9588(5) 0.4588(10) 0.7127(19) 0.111(7) Uani 1 1 d . U . . .
C15_6 C 0.9624(5) 0.5241(11) 0.681(2) 0.106(7) Uani 1 1 d . U . . .
N16_6 N 0.9398(5) 0.5336(11) 0.620(2) 0.120(7) Uani 1 1 d . U . . .
C17_6 C 0.9168(6) 0.4925(11) 0.580(2) 0.132(9) Uani 1 1 d . U . . .
H17_6 H 0.904690 0.504233 0.536469 0.159 Uiso 1 1 calc R U . . .
C18_6 C 0.9120(6) 0.4268(12) 0.612(2) 0.139(8) Uani 1 1 d D U . . .
C19_6 C 0.9350(5) 0.4129(11) 0.675(2) 0.116(7) Uani 1 1 d . U . . .
O20_6 O 0.9306(6) 0.3571(9) 0.708(2) 0.152(12) Uani 1 1 d . U . . .
H20_6 H 0.913539 0.337123 0.686777 0.228 Uiso 1 1 calc R U . . .
O21_6 O 0.9804(4) 0.5713(8) 0.7087(16) 0.113(9) Uani 1 1 d . U . . .
O22_6 O 0.9415(5) 0.5937(10) 0.5894(17) 0.127(10) Uani 1 1 d . U . . .
H22_6 H 0.955120 0.616851 0.615816 0.191 Uiso 1 1 calc R U . . .
C23_6 C 0.8841(6) 0.3858(11) 0.5603(16) 0.164(9) Uani 1 1 d D U . . .
C24_6 C 0.9080(9) 0.3380(12) 0.522(2) 0.233(14) Uani 1 1 d D U . . .
H24_6 H 0.921446 0.355962 0.484783 0.280 Uiso 1 1 calc R U . . .
C25_6 C 0.8950(10) 0.2697(14) 0.512(2) 0.268(16) Uani 1 1 d D U . . .
H25_6 H 0.900921 0.247393 0.468792 0.321 Uiso 1 1 calc R U . . .
C26_6 C 0.8640(11) 0.2412(16) 0.551(3) 0.32(2) Uani 1 1 d D U . . .
H26_6 H 0.847797 0.220856 0.512603 0.380 Uiso 1 1 calc R U . . .
C27_6 C 0.8388(11) 0.2907(17) 0.582(3) 0.32(2) Uani 1 1 d D U . . .
H27A_6 H 0.827399 0.270634 0.620340 0.380 Uiso 1 1 calc R U . . .
H27B_6 H 0.819324 0.302370 0.544997 0.380 Uiso 1 1 calc R U . . .
C28_6 C 0.8587(7) 0.3540(13) 0.6112(18) 0.206(13) Uani 1 1 d D U . . .
H28A_6 H 0.840207 0.384985 0.621419 0.247 Uiso 1 1 calc R U . . .
H28B_6 H 0.873401 0.344075 0.655916 0.247 Uiso 1 1 calc R U . . .
O29_6 O 0.8614(9) 0.4173(14) 0.501(2) 0.213(15) Uani 1 1 d D U . . .
H29_6 H 0.850964 0.448406 0.516458 0.320 Uiso 1 1 calc R U . . .
O30_6 O 0.9260(10) 0.2893(18) 0.564(3) 0.268(17) Uani 1 1 d D U . . .
O31_6 O 0.8771(15) 0.188(2) 0.594(4) 0.38(3) Uani 1 1 d D U . . .
H31_6 H 0.860643 0.161878 0.595103 0.563 Uiso 1 1 calc R U . . .
 
loop_
 _atom_site_aniso_label
 _atom_site_aniso_U_11
 _atom_site_aniso_U_22
 _atom_site_aniso_U_33
 _atom_site_aniso_U_23
 _atom_site_aniso_U_13
 _atom_site_aniso_U_12
O01 0.031(6) 0.038(6) 0.15(2) 0.015(10) 0.032(8) 0.010(5)
O05 0.21(4) 0.24(5) 1.2(3) -0.06(10) -0.04(9) 0.06(4)
O04 0.23(3) 0.14(2) 0.33(8) 0.04(3) -0.05(4) -0.02(2)
O03 0.09(2) 0.19(4) 0.46(11) 0.000 0.05(4) 0.000
O02 0.045(7) 0.049(7) 0.13(2) -0.011(10) 0.030(9) 0.011(6)
C1_1 0.060(9) 0.077(10) 0.20(2) 0.009(13) 0.023(12) 0.015(8)
C2_1 0.089(12) 0.083(11) 0.20(2) -0.008(15) 0.031(13) -0.002(10)
C3_1 0.081(12) 0.115(13) 0.19(3) 0.024(14) 0.022(14) 0.006(10)
C4_1 0.061(12) 0.107(13) 0.24(2) 0.023(15) 0.029(13) 0.012(10)
C5_1 0.055(12) 0.094(11) 0.24(2) -0.010(13) 0.034(11) -0.012(10)
C6_1 0.066(11) 0.092(11) 0.21(2) -0.009(14) 0.030(12) 0.003(9)
C7_1 0.075(13) 0.094(13) 0.22(3) -0.012(16) 0.025(12) 0.000(11)
C8_1 0.091(14) 0.123(14) 0.25(3) -0.040(18) 0.041(16) -0.005(12)
C9_1 0.120(18) 0.129(15) 0.24(3) -0.02(2) 0.080(17) -0.012(15)
C10_1 0.091(15) 0.100(13) 0.26(3) -0.007(18) 0.071(15) -0.011(12)
C11_1 0.112(15) 0.093(14) 0.26(4) 0.01(2) 0.005(18) -0.043(12)
C12_1 0.069(11) 0.072(10) 0.22(2) 0.017(13) 0.043(13) 0.024(9)
O13_1 0.099(12) 0.058(9) 0.23(3) 0.010(13) 0.060(15) 0.006(8)
C14_1 0.063(10) 0.073(10) 0.19(2) -0.007(12) 0.018(12) 0.002(8)
C15_1 0.062(11) 0.058(10) 0.18(2) -0.009(12) 0.019(12) -0.010(7)
N16_1 0.073(10) 0.073(11) 0.19(2) 0.000(13) 0.025(12) 0.000(8)
C17_1 0.088(12) 0.083(12) 0.17(2) -0.005(13) 0.011(13) 0.002(8)
C18_1 0.074(11) 0.084(11) 0.18(2) -0.011(14) 0.003(13) -0.002(8)
C19_1 0.068(11) 0.080(12) 0.21(2) 0.008(14) 0.032(15) 0.000(8)
O20_1 0.084(11) 0.071(10) 0.24(3) 0.007(14) 0.038(15) 0.014(8)
O21_1 0.078(10) 0.075(10) 0.16(2) -0.012(12) 0.029(12) -0.001(7)
O22_1 0.097(12) 0.087(11) 0.17(3) 0.038(14) 0.033(14) 0.019(9)
C23_1 0.081(10) 0.118(12) 0.20(2) 0.010(16) -0.003(15) 0.010(9)
C24_1 0.153(15) 0.116(13) 0.22(3) 0.005(16) 0.033(19) -0.005(12)
C25_1 0.157(19) 0.126(17) 0.23(3) 0.019(17) 0.00(2) -0.030(14)
C26_1 0.16(2) 0.168(17) 0.23(3) 0.03(2) 0.01(2) -0.029(17)
C27_1 0.17(2) 0.181(17) 0.21(3) 0.01(2) 0.01(2) -0.025(18)
C28_1 0.144(17) 0.120(16) 0.21(2) 0.026(19) 0.00(2) 0.024(13)
O29_1 0.068(10) 0.24(3) 0.29(4) 0.03(3) -0.016(15) 0.003(13)
O30_1 0.143(14) 0.131(16) 0.23(3) -0.003(19) -0.014(18) -0.029(12)
O31_1 0.18(2) 0.18(2) 0.25(5) 0.06(3) 0.01(3) -0.030(19)
C1_2 0.062(10) 0.060(9) 0.22(2) -0.001(12) 0.012(14) -0.011(8)
C2_2 0.102(14) 0.088(11) 0.21(2) -0.004(16) 0.011(16) -0.001(11)
C3_2 0.113(15) 0.100(14) 0.20(2) -0.010(15) 0.016(16) -0.010(10)
C4_2 0.076(12) 0.118(16) 0.22(2) -0.004(18) 0.017(15) -0.010(10)
C5_2 0.066(9) 0.059(10) 0.21(2) -0.026(14) 0.022(11) -0.022(8)
C6_2 0.080(10) 0.057(9) 0.22(2) -0.006(13) 0.032(13) -0.006(8)
C7_2 0.085(10) 0.087(13) 0.24(3) 0.017(15) 0.054(14) -0.002(11)
C8_2 0.124(13) 0.078(12) 0.23(3) -0.007(17) 0.026(14) 0.012(11)
C9_2 0.100(12) 0.070(13) 0.23(3) 0.005(17) 0.015(15) 0.002(10)
C10_2 0.081(10) 0.084(14) 0.22(2) -0.012(17) 0.012(13) -0.013(11)
C11_2 0.101(14) 0.096(11) 0.24(4) 0.004(17) 0.029(18) 0.008(12)
C12_2 0.065(10) 0.094(13) 0.20(2) -0.002(14) 0.003(12) 0.006(9)
O13_2 0.080(10) 0.093(12) 0.28(4) -0.048(18) -0.031(15) 0.014(9)
C14_2 0.055(8) 0.103(13) 0.18(2) 0.022(13) 0.014(10) -0.003(9)
C15_2 0.058(8) 0.081(12) 0.18(2) 0.029(13) -0.015(10) 0.005(8)
N16_2 0.069(9) 0.110(14) 0.21(2) -0.007(14) 0.009(11) -0.011(9)
C17_2 0.088(11) 0.102(14) 0.25(3) -0.012(17) 0.035(13) -0.004(10)
C18_2 0.073(10) 0.130(17) 0.24(2) -0.011(16) 0.043(12) -0.001(10)
C19_2 0.069(9) 0.083(13) 0.23(2) 0.003(14) 0.043(11) -0.004(9)
O20_2 0.068(9) 0.126(15) 0.25(3) -0.033(18) 0.042(12) 0.008(9)
O21_2 0.082(9) 0.057(9) 0.17(3) 0.002(12) -0.003(11) -0.003(7)
O22_2 0.065(9) 0.113(13) 0.22(3) -0.046(17) 0.052(12) -0.011(9)
C23_2 0.131(17) 0.177(18) 0.32(3) -0.02(2) 0.102(19) 0.028(14)
C24_2 0.18(2) 0.172(18) 0.39(4) 0.02(2) 0.15(2) 0.095(18)
C25_2 0.29(3) 0.26(3) 0.42(4) -0.02(3) 0.18(3) 0.12(2)
C26_2 0.38(4) 0.39(4) 0.43(4) -0.05(4) 0.16(3) 0.09(4)
C27_2 0.29(4) 0.41(4) 0.40(4) -0.11(4) 0.17(3) 0.05(3)
C28_2 0.21(3) 0.37(4) 0.36(4) -0.11(3) 0.17(2) -0.04(3)
O29_2 0.19(2) 0.173(19) 0.40(6) 0.07(3) 0.19(3) 0.027(16)
O30_2 0.29(3) 0.19(2) 0.43(5) -0.03(3) 0.14(3) 0.07(2)
O31_2 0.62(10) 0.40(5) 0.51(10) -0.12(6) 0.17(8) 0.11(6)
C1_3 0.059(9) 0.062(10) 0.20(2) 0.009(15) 0.006(11) 0.005(7)
C2_3 0.062(9) 0.081(12) 0.20(2) 0.020(16) 0.009(12) -0.002(8)
C3_3 0.095(11) 0.097(14) 0.20(3) 0.005(17) 0.003(13) -0.013(11)
C4_3 0.078(10) 0.074(12) 0.20(2) 0.003(15) -0.009(14) 0.001(10)
C5_3 0.081(11) 0.072(12) 0.21(2) 0.011(12) 0.009(14) 0.008(9)
C6_3 0.065(9) 0.077(12) 0.21(2) 0.006(13) 0.013(12) 0.010(7)
C7_3 0.071(11) 0.104(15) 0.21(3) 0.001(15) 0.013(14) 0.018(10)
C8_3 0.089(12) 0.090(13) 0.21(3) 0.000(14) 0.017(14) 0.030(9)
C9_3 0.070(11) 0.107(15) 0.22(3) 0.032(17) 0.029(16) 0.018(9)
C10_3 0.066(11) 0.079(13) 0.21(2) 0.016(14) -0.002(14) 0.003(9)
C11_3 0.094(12) 0.099(15) 0.26(4) 0.00(2) 0.039(18) -0.006(11)
C12_3 0.062(10) 0.068(11) 0.23(2) 0.014(12) 0.012(11) -0.018(9)
O13_3 0.077(10) 0.103(13) 0.24(3) 0.040(16) 0.001(14) -0.012(10)
C14_3 0.051(10) 0.072(9) 0.23(2) 0.007(12) 0.016(11) 0.005(8)
C15_3 0.054(11) 0.082(9) 0.19(2) 0.004(12) 0.033(11) 0.001(9)
N16_3 0.055(10) 0.087(10) 0.21(2) -0.005(12) 0.008(11) 0.000(8)
C17_3 0.083(13) 0.090(11) 0.24(3) -0.003(14) 0.000(14) -0.017(10)
C18_3 0.062(12) 0.096(11) 0.24(2) 0.012(13) 0.021(12) -0.004(9)
C19_3 0.065(12) 0.085(11) 0.24(2) 0.010(13) 0.019(12) -0.014(10)
O20_3 0.074(10) 0.066(9) 0.28(3) 0.016(14) 0.034(14) 0.005(8)
O21_3 0.052(8) 0.071(9) 0.19(3) 0.026(12) 0.002(10) -0.007(7)
O22_3 0.055(9) 0.100(10) 0.21(3) 0.003(14) -0.001(12) 0.000(8)
C23_3 0.087(13) 0.119(14) 0.27(3) -0.016(15) 0.009(12) -0.012(9)
C24_3 0.14(2) 0.18(2) 0.28(3) -0.043(19) -0.035(19) 0.025(17)
C25_3 0.19(2) 0.19(2) 0.32(4) -0.07(2) -0.05(2) 0.023(17)
C26_3 0.21(3) 0.23(2) 0.32(4) -0.09(3) -0.03(2) 0.06(2)
C27_3 0.15(2) 0.20(3) 0.33(4) -0.06(2) 0.00(2) 0.018(18)
C28_3 0.103(16) 0.154(19) 0.28(3) -0.02(2) 0.012(17) 0.017(13)
O29_3 0.129(17) 0.140(19) 0.32(4) -0.03(2) 0.051(19) -0.059(14)
O30_3 0.21(3) 0.20(2) 0.28(4) -0.03(3) -0.02(3) 0.001(19)
O31_3 0.33(6) 0.42(7) 0.33(6) -0.07(5) 0.02(5) 0.10(5)
C1_4 0.089(11) 0.093(10) 0.19(2) -0.033(14) 0.036(16) -0.007(10)
C2_4 0.109(15) 0.128(13) 0.18(3) -0.033(17) 0.021(18) -0.008(12)
C3_4 0.122(17) 0.16(2) 0.18(3) -0.020(19) 0.044(18) 0.012(14)
C4_4 0.108(16) 0.136(19) 0.20(3) -0.045(18) 0.038(16) 0.000(13)
C5_4 0.090(12) 0.098(14) 0.22(3) -0.031(17) 0.015(13) 0.009(11)
C6_4 0.074(10) 0.104(11) 0.20(2) -0.020(15) 0.022(13) -0.009(10)
C7_4 0.126(15) 0.133(18) 0.21(3) -0.003(19) 0.036(16) -0.029(15)
C8_4 0.160(16) 0.108(16) 0.19(3) -0.01(2) 0.025(17) -0.003(15)
C9_4 0.131(15) 0.105(16) 0.24(3) 0.00(2) -0.007(19) 0.013(14)
C10_4 0.090(12) 0.122(18) 0.23(3) -0.03(2) 0.009(15) 0.024(13)
C11_4 0.17(2) 0.143(15) 0.20(5) 0.00(2) 0.03(2) 0.003(18)
C12_4 0.067(10) 0.124(15) 0.20(2) -0.020(15) 0.026(12) 0.007(10)
O13_4 0.078(10) 0.148(18) 0.24(4) -0.04(2) 0.002(14) 0.002(11)
C14_4 0.092(10) 0.094(13) 0.21(2) -0.027(14) 0.033(12) -0.007(10)
C15_4 0.087(10) 0.112(15) 0.19(2) -0.015(15) 0.025(12) 0.005(10)
N16_4 0.090(10) 0.101(13) 0.19(2) -0.017(14) 0.017(11) 0.018(10)
C17_4 0.114(12) 0.110(15) 0.22(3) -0.038(18) 0.034(14) 0.014(12)
C18_4 0.114(12) 0.143(19) 0.24(3) -0.053(17) 0.047(14) -0.009(12)
C19_4 0.112(11) 0.097(14) 0.23(3) -0.033(16) 0.045(13) -0.007(12)
O20_4 0.111(12) 0.142(18) 0.27(4) -0.04(2) 0.040(16) -0.017(13)
O21_4 0.089(10) 0.062(9) 0.19(3) -0.029(13) 0.029(12) 0.007(8)
O22_4 0.101(11) 0.123(15) 0.17(3) -0.034(16) 0.035(13) 0.015(10)
C23_4 0.109(12) 0.136(15) 0.22(3) -0.036(14) 0.032(13) 0.000(12)
C24_4 0.129(14) 0.146(16) 0.24(3) -0.016(17) 0.030(17) 0.007(14)
C25_4 0.135(14) 0.18(2) 0.24(3) 0.00(2) 0.043(16) 0.014(15)
C26_4 0.119(15) 0.25(3) 0.27(4) 0.01(3) 0.01(2) -0.018(15)
C27_4 0.107(16) 0.23(3) 0.30(4) 0.04(3) 0.04(2) 0.001(15)
C28_4 0.128(15) 0.15(2) 0.30(3) 0.00(2) 0.022(18) 0.035(13)
O29_4 0.138(18) 0.149(18) 0.34(5) -0.10(2) 0.06(2) -0.035(15)
O30_4 0.155(18) 0.149(16) 0.26(4) -0.02(2) 0.037(19) -0.001(13)
O31_4 0.13(2) 0.34(5) 0.35(7) 0.11(5) 0.01(3) -0.06(2)
C1_5 0.075(11) 0.081(10) 0.22(2) -0.010(14) 0.040(12) -0.004(9)
C2_5 0.130(15) 0.147(18) 0.24(3) 0.02(2) -0.017(19) -0.020(15)
C3_5 0.107(16) 0.164(18) 0.24(3) 0.038(18) 0.019(17) -0.005(14)
C4_5 0.083(15) 0.139(16) 0.23(3) 0.033(17) 0.069(14) 0.002(12)
C5_5 0.061(12) 0.105(12) 0.26(3) 0.005(15) 0.051(13) -0.008(10)
C6_5 0.080(12) 0.093(11) 0.25(3) -0.003(15) 0.025(13) -0.018(10)
C7_5 0.082(14) 0.111(14) 0.25(3) -0.016(17) 0.036(13) -0.037(12)
C8_5 0.092(14) 0.128(15) 0.27(3) -0.009(17) 0.042(16) -0.017(13)
C9_5 0.119(17) 0.120(14) 0.26(3) -0.007(19) 0.047(17) -0.023(15)
C10_5 0.077(13) 0.108(14) 0.26(3) 0.002(16) 0.059(14) -0.025(11)
C11_5 0.18(2) 0.19(3) 0.22(5) 0.03(3) -0.02(3) -0.08(2)
O13_5 0.105(13) 0.067(10) 0.20(3) -0.006(13) 0.044(15) -0.009(8)
C14_5 0.079(11) 0.066(10) 0.18(2) -0.026(11) 0.012(12) -0.009(8)
C15_5 0.067(11) 0.084(12) 0.17(2) -0.011(14) 0.015(13) -0.014(8)
N16_5 0.099(13) 0.094(12) 0.16(2) -0.004(14) 0.018(14) -0.008(9)
C17_5 0.122(16) 0.086(13) 0.20(3) 0.003(15) 0.003(16) -0.019(9)
C18_5 0.106(15) 0.108(13) 0.21(3) 0.012(16) -0.005(15) 0.000(11)
C19_5 0.093(14) 0.112(15) 0.20(3) 0.002(15) -0.005(15) 0.022(11)
O20_5 0.083(12) 0.111(14) 0.26(4) 0.037(18) 0.032(16) 0.030(10)
C20_5 0.089(14) 0.091(12) 0.21(2) 0.001(14) 0.044(14) 0.011(10)
O21_5 0.080(10) 0.090(11) 0.13(2) -0.016(12) 0.044(12) 0.004(8)
O22_5 0.097(12) 0.113(13) 0.19(3) 0.012(16) 0.037(15) -0.019(9)
C23_5 0.136(14) 0.108(12) 0.27(3) 0.043(15) 0.032(16) -0.002(12)
C24_5 0.20(2) 0.110(13) 0.29(3) 0.028(17) 0.06(2) -0.012(16)
C25_5 0.24(3) 0.118(16) 0.31(4) 0.04(2) 0.03(3) -0.028(18)
C27_5 0.27(3) 0.16(2) 0.29(4) 0.05(2) 0.03(3) -0.04(2)
C26_5 0.29(3) 0.134(18) 0.32(4) 0.05(2) 0.04(3) -0.05(2)
O29_5 0.136(15) 0.15(2) 0.33(5) 0.05(2) -0.015(19) 0.028(14)
O30_5 0.23(3) 0.19(3) 0.31(4) 0.02(3) 0.00(3) -0.024(19)
C28_5 0.21(2) 0.139(18) 0.26(3) 0.02(2) 0.05(2) 0.00(2)
O31_5 0.33(4) 0.24(4) 0.43(8) 0.03(5) 0.11(5) -0.10(4)
C1_6 0.068(9) 0.106(14) 0.22(3) -0.018(18) 0.006(13) -0.011(8)
C2_6 0.117(13) 0.124(17) 0.22(3) -0.03(2) -0.003(16) 0.006(12)
C3_6 0.118(13) 0.138(18) 0.24(3) -0.01(2) -0.029(17) 0.001(15)
C4_6 0.125(15) 0.15(2) 0.25(3) 0.009(19) -0.03(2) 0.008(17)
C5_6 0.098(12) 0.109(17) 0.25(3) 0.017(15) -0.026(17) 0.024(11)
C6_6 0.086(11) 0.108(15) 0.23(3) 0.025(16) 0.006(15) 0.017(9)
C7_6 0.085(13) 0.105(17) 0.26(3) -0.009(16) 0.034(17) 0.001(12)
C8_6 0.098(14) 0.136(19) 0.24(3) -0.006(18) 0.032(18) -0.001(13)
C9_6 0.117(16) 0.14(2) 0.27(3) 0.01(2) 0.01(2) -0.005(13)
C10_6 0.066(12) 0.14(2) 0.25(3) 0.012(17) -0.021(18) -0.006(12)
C11_6 0.122(18) 0.26(4) 0.26(5) -0.01(3) 0.03(2) 0.07(2)
C12_6 0.071(11) 0.092(13) 0.21(2) 0.003(14) 0.004(12) -0.004(10)
O13_6 0.100(13) 0.103(13) 0.24(4) 0.015(17) 0.026(15) -0.009(11)
C14_6 0.069(11) 0.081(10) 0.18(2) -0.014(11) 0.014(11) -0.007(9)
C15_6 0.056(11) 0.093(10) 0.17(2) -0.002(12) 0.028(11) 0.000(9)
N16_6 0.058(11) 0.103(11) 0.20(2) 0.001(13) 0.011(11) -0.004(9)
C17_6 0.086(13) 0.111(13) 0.20(3) 0.003(14) 0.016(14) -0.028(11)
C18_6 0.094(14) 0.107(12) 0.21(2) -0.002(14) 0.002(13) -0.022(11)
C19_6 0.062(11) 0.087(11) 0.20(2) -0.002(12) 0.019(11) -0.018(9)
O20_6 0.104(13) 0.079(11) 0.28(4) 0.014(15) 0.037(17) -0.017(10)
O21_6 0.063(10) 0.082(10) 0.20(3) 0.014(13) 0.025(11) 0.002(7)
O22_6 0.076(10) 0.108(11) 0.19(3) -0.003(15) -0.026(13) -0.006(10)
C23_6 0.114(16) 0.121(15) 0.25(3) -0.007(16) 0.003(13) -0.030(10)
C24_6 0.21(3) 0.16(2) 0.33(4) -0.07(2) 0.03(2) -0.008(15)
C25_6 0.25(3) 0.16(2) 0.38(4) -0.04(3) -0.01(3) -0.02(2)
C26_6 0.32(4) 0.21(3) 0.41(5) -0.01(3) 0.01(3) -0.05(3)
C27_6 0.33(4) 0.23(3) 0.40(5) -0.03(3) 0.07(3) -0.12(2)
C28_6 0.104(16) 0.20(2) 0.31(4) 0.03(2) -0.012(18) -0.073(16)
O29_6 0.20(3) 0.16(2) 0.27(4) 0.01(3) -0.05(2) -0.038(18)
O30_6 0.26(3) 0.18(3) 0.35(5) -0.09(3) -0.01(3) 0.03(2)
O31_6 0.33(5) 0.29(5) 0.48(9) 0.07(5) -0.08(5) -0.09(4)
 
_geom_special_details
;
 All esds (except the esd in the dihedral angle between two l.s. planes)
 are estimated using the full covariance matrix.  The cell esds are taken
 into account individually in the estimation of esds in distances, angles
 and torsion angles; correlations between esds in cell parameters are only
 used when they are defined by crystal symmetry.  An approximate (isotropic)
 treatment of cell esds is used for estimating esds involving l.s. planes.
;
 
loop_
 _geom_bond_atom_site_label_1
 _geom_bond_atom_site_label_2
 _geom_bond_distance
 _geom_bond_site_symmetry_2
 _geom_bond_publ_flag
C1_1 C12_1 1.48(3) . ?
C1_1 C2_1 1.54(3) . ?
C1_1 C6_1 1.61(3) . ?
C2_1 C3_1 1.52(2) . ?
C2_1 C11_1 1.56(2) . ?
C3_1 C4_1 1.39(4) . ?
C4_1 C5_1 1.38(5) . ?
C5_1 C6_1 1.57(4) . ?
C5_1 C10_1 1.64(4) . ?
C6_1 C7_1 1.53(5) . ?
C7_1 C8_1 1.52(4) . ?
C8_1 C9_1 1.60(4) . ?
C9_1 C10_1 1.57(5) . ?
C12_1 O13_1 1.22(3) . ?
C12_1 C14_1 1.56(4) . ?
C14_1 C15_1 1.36(3) . ?
C14_1 C19_1 1.52(4) . ?
C15_1 O21_1 1.29(3) . ?
C15_1 N16_1 1.42(4) . ?
N16_1 O22_1 1.35(3) . ?
N16_1 C17_1 1.38(3) . ?
C17_1 C18_1 1.39(3) . ?
C18_1 C19_1 1.43(5) . ?
C18_1 C23_1 1.57(4) . ?
C19_1 O20_1 1.24(3) . ?
C23_1 O29_1 1.45(2) . ?
C23_1 C24_1 1.55(2) . ?
C23_1 C28_1 1.55(2) . ?
C24_1 O30_1 1.41(2) . ?
C24_1 C25_1 1.49(2) . ?
C25_1 O30_1 1.47(2) . ?
C25_1 C26_1 1.55(2) . ?
C26_1 O31_1 1.41(2) . ?
C26_1 C27_1 1.55(2) . ?
C27_1 C28_1 1.58(2) . ?
C1_2 C12_2 1.50(3) . ?
C1_2 C2_2 1.53(3) . ?
C1_2 C6_2 1.57(3) . ?
C2_2 C3_2 1.52(3) . ?
C2_2 C11_2 1.57(2) . ?
C3_2 C4_2 1.44(4) . ?
C4_2 C5_2 1.54(4) . ?
C5_2 C10_2 1.53(2) . ?
C5_2 C6_2 1.54(2) . ?
C6_2 C7_2 1.55(3) . ?
C7_2 C8_2 1.57(3) . ?
C8_2 C9_2 1.53(2) . ?
C9_2 C10_2 1.53(3) . ?
C12_2 O13_2 1.19(3) . ?
C12_2 C14_2 1.59(4) . ?
C14_2 C15_2 1.3900 . ?
C14_2 C19_2 1.3900 . ?
C15_2 O21_2 1.37(2) . ?
C15_2 N16_2 1.3900 . ?
N16_2 O22_2 1.38(2) . ?
N16_2 C17_2 1.3900 . ?
C17_2 C18_2 1.3900 . ?
C18_2 C19_2 1.3900 . ?
C18_2 C23_2 1.75(3) . ?
C19_2 O20_2 1.33(3) . ?
C23_2 O29_2 1.44(2) . ?
C23_2 C28_2 1.56(3) . ?
C23_2 C24_2 1.57(3) . ?
C24_2 O30_2 1.45(3) . ?
C24_2 C25_2 1.50(3) . ?
C25_2 O30_2 1.49(3) . ?
C25_2 C26_2 1.56(3) . ?
C26_2 O31_2 1.50(3) . ?
C26_2 C27_2 1.57(3) . ?
C27_2 C28_2 1.53(3) . ?
C1_3 C2_3 1.50(4) . ?
C1_3 C6_3 1.57(3) . ?
C1_3 C12_3 1.63(3) . ?
C2_3 C3_3 1.50(4) . ?
C2_3 C11_3 1.52(3) . ?
C3_3 C4_3 1.33(3) . ?
C4_3 C5_3 1.53(4) . ?
C5_3 C10_3 1.53(3) . ?
C5_3 C6_3 1.55(2) . ?
C6_3 C7_3 1.52(3) . ?
C7_3 C8_3 1.54(2) . ?
C8_3 C9_3 1.57(2) . ?
C9_3 C10_3 1.54(3) . ?
C12_3 O13_3 1.24(3) . ?
C12_3 C14_3 1.50(5) . ?
C14_3 C19_3 1.42(4) . ?
C14_3 C15_3 1.55(3) . ?
C15_3 O21_3 1.24(3) . ?
C15_3 N16_3 1.34(4) . ?
N16_3 C17_3 1.33(3) . ?
N16_3 O22_3 1.46(3) . ?
C17_3 C18_3 1.52(4) . ?
C18_3 C19_3 1.36(5) . ?
C18_3 C23_3 1.51(4) . ?
C19_3 O20_3 1.39(3) . ?
C23_3 O29_3 1.47(3) . ?
C23_3 C28_3 1.51(2) . ?
C23_3 C24_3 1.55(3) . ?
C24_3 O30_3 1.45(3) . ?
C24_3 C25_3 1.49(3) . ?
C25_3 O30_3 1.45(3) . ?
C25_3 C26_3 1.57(3) . ?
C26_3 O31_3 1.45(3) . ?
C26_3 C27_3 1.55(3) . ?
C27_3 C28_3 1.55(3) . ?
C1_4 C2_4 1.54(3) . ?
C1_4 C6_4 1.57(2) . ?
C1_4 C12_4 1.61(4) . ?
C2_4 C3_4 1.39(4) . ?
C2_4 C11_4 1.49(4) . ?
C3_4 C4_4 1.32(4) . ?
C4_4 C5_4 1.42(5) . ?
C5_4 C6_4 1.54(2) . ?
C5_4 C10_4 1.54(3) . ?
C6_4 C7_4 1.55(3) . ?
C7_4 C8_4 1.51(3) . ?
C8_4 C9_4 1.48(2) . ?
C9_4 C10_4 1.53(3) . ?
C12_4 O13_4 1.29(3) . ?
C12_4 C14_4 1.46(4) . ?
C14_4 C15_4 1.3900 . ?
C14_4 C19_4 1.3900 . ?
C15_4 O21_4 1.37(2) . ?
C15_4 N16_4 1.3900 . ?
N16_4 O22_4 1.38(3) . ?
N16_4 C17_4 1.3900 . ?
C17_4 C18_4 1.3900 . ?
C18_4 C19_4 1.3900 . ?
C18_4 C23_4 1.68(3) . ?
C19_4 O20_4 1.40(3) . ?
C23_4 O29_4 1.47(3) . ?
C23_4 C24_4 1.52(3) . ?
C23_4 C28_4 1.58(3) . ?
C24_4 O30_4 1.41(3) . ?
C24_4 C25_4 1.52(2) . ?
C25_4 O30_4 1.47(3) . ?
C25_4 C26_4 1.51(3) . ?
C26_4 O31_4 1.46(3) . ?
C26_4 C27_4 1.58(3) . ?
C27_4 C28_4 1.54(3) . ?
C1_5 C20_5 1.51(4) . ?
C1_5 C6_5 1.62(3) . ?
C1_5 C2_5 1.63(5) . ?
C2_5 C3_5 1.49(4) . ?
C2_5 C11_5 1.60(3) . ?
C3_5 C4_5 1.41(4) . ?
C4_5 C5_5 1.37(5) . ?
C5_5 C10_5 1.56(3) . ?
C5_5 C6_5 1.58(2) . ?
C6_5 C7_5 1.54(3) . ?
C7_5 C8_5 1.55(3) . ?
C8_5 C9_5 1.54(3) . ?
C9_5 C10_5 1.54(3) . ?
O13_5 C20_5 1.21(3) . ?
C14_5 C19_5 1.40(4) . ?
C14_5 C15_5 1.46(3) . ?
C14_5 C20_5 1.51(5) . ?
C15_5 O21_5 1.22(3) . ?
C15_5 N16_5 1.40(4) . ?
N16_5 C17_5 1.33(4) . ?
N16_5 O22_5 1.41(3) . ?
C17_5 C18_5 1.43(4) . ?
C18_5 C19_5 1.47(5) . ?
C18_5 C23_5 1.58(3) . ?
C19_5 O20_5 1.35(4) . ?
C23_5 O29_5 1.43(2) . ?
C23_5 C24_5 1.54(3) . ?
C23_5 C28_5 1.56(3) . ?
C24_5 O30_5 1.40(3) . ?
C24_5 C25_5 1.48(3) . ?
C25_5 O30_5 1.48(3) . ?
C25_5 C26_5 1.57(3) . ?
C27_5 C28_5 1.51(3) . ?
C27_5 C26_5 1.55(3) . ?
C26_5 O31_5 1.44(3) . ?
C1_6 C2_6 1.54(5) . ?
C1_6 C12_6 1.55(3) . ?
C1_6 C6_6 1.56(3) . ?
C2_6 C3_6 1.51(3) . ?
C2_6 C11_6 1.59(3) . ?
C3_6 C4_6 1.35(3) . ?
C4_6 C5_6 1.43(6) . ?
C5_6 C6_6 1.57(4) . ?
C5_6 C10_6 1.64(6) . ?
C6_6 C7_6 1.53(5) . ?
C7_6 C8_6 1.37(5) . ?
C8_6 C9_6 1.56(4) . ?
C9_6 C10_6 1.49(5) . ?
C12_6 O13_6 1.19(3) . ?
C12_6 C14_6 1.49(4) . ?
C14_6 C19_6 1.43(3) . ?
C14_6 C15_6 1.49(4) . ?
C15_6 O21_6 1.26(3) . ?
C15_6 N16_6 1.37(4) . ?
N16_6 C17_6 1.36(4) . ?
N16_6 O22_6 1.38(3) . ?
C17_6 C18_6 1.51(4) . ?
C18_6 C19_6 1.41(4) . ?
C18_6 C23_6 1.58(3) . ?
C19_6 O20_6 1.33(3) . ?
C23_6 O29_6 1.47(2) . ?
C23_6 C24_6 1.55(2) . ?
C23_6 C28_6 1.55(2) . ?
C24_6 O30_6 1.40(2) . ?
C24_6 C25_6 1.51(2) . ?
C25_6 O30_6 1.48(2) . ?
C25_6 C26_6 1.54(2) . ?
C26_6 O31_6 1.41(2) . ?
C26_6 C27_6 1.54(2) . ?
C27_6 C28_6 1.58(2) . ?
 
loop_
 _geom_angle_atom_site_label_1
 _geom_angle_atom_site_label_2
 _geom_angle_atom_site_label_3
 _geom_angle
 _geom_angle_site_symmetry_1
 _geom_angle_site_symmetry_3
 _geom_angle_publ_flag
C12_1 C1_1 C2_1 110(2) . . ?
C12_1 C1_1 C6_1 110.1(18) . . ?
C2_1 C1_1 C6_1 109(2) . . ?
C3_1 C2_1 C1_1 115(2) . . ?
C3_1 C2_1 C11_1 111(2) . . ?
C1_1 C2_1 C11_1 112(2) . . ?
C4_1 C3_1 C2_1 119(3) . . ?
C5_1 C4_1 C3_1 126(3) . . ?
C4_1 C5_1 C6_1 118(2) . . ?
C4_1 C5_1 C10_1 110(2) . . ?
C6_1 C5_1 C10_1 107(3) . . ?
C7_1 C6_1 C5_1 117(2) . . ?
C7_1 C6_1 C1_1 115(3) . . ?
C5_1 C6_1 C1_1 108.1(18) . . ?
C8_1 C7_1 C6_1 118(2) . . ?
C7_1 C8_1 C9_1 107(3) . . ?
C10_1 C9_1 C8_1 115(3) . . ?
C9_1 C10_1 C5_1 114(2) . . ?
O13_1 C12_1 C1_1 117(3) . . ?
O13_1 C12_1 C14_1 122(2) . . ?
C1_1 C12_1 C14_1 121(2) . . ?
C15_1 C14_1 C19_1 123(3) . . ?
C15_1 C14_1 C12_1 123(2) . . ?
C19_1 C14_1 C12_1 114(2) . . ?
O21_1 C15_1 C14_1 128(3) . . ?
O21_1 C15_1 N16_1 114(2) . . ?
C14_1 C15_1 N16_1 118(2) . . ?
O22_1 N16_1 C17_1 117(3) . . ?
O22_1 N16_1 C15_1 120(2) . . ?
C17_1 N16_1 C15_1 122(2) . . ?
N16_1 C17_1 C18_1 121(3) . . ?
C17_1 C18_1 C19_1 121(3) . . ?
C17_1 C18_1 C23_1 124(3) . . ?
C19_1 C18_1 C23_1 115(2) . . ?
O20_1 C19_1 C18_1 120(3) . . ?
O20_1 C19_1 C14_1 125(3) . . ?
C18_1 C19_1 C14_1 114(2) . . ?
O29_1 C23_1 C24_1 107(2) . . ?
O29_1 C23_1 C28_1 111(2) . . ?
C24_1 C23_1 C28_1 111(2) . . ?
O29_1 C23_1 C18_1 110(2) . . ?
C24_1 C23_1 C18_1 109(2) . . ?
C28_1 C23_1 C18_1 109(2) . . ?
O30_1 C24_1 C25_1 60.6(12) . . ?
O30_1 C24_1 C23_1 117(2) . . ?
C25_1 C24_1 C23_1 123(2) . . ?
O30_1 C25_1 C24_1 57.1(11) . . ?
O30_1 C25_1 C26_1 109(2) . . ?
C24_1 C25_1 C26_1 120(2) . . ?
O31_1 C26_1 C25_1 111(3) . . ?
O31_1 C26_1 C27_1 116(2) . . ?
C25_1 C26_1 C27_1 107(2) . . ?
C26_1 C27_1 C28_1 108.9(19) . . ?
C23_1 C28_1 C27_1 113(2) . . ?
C24_1 O30_1 C25_1 62.4(12) . . ?
C12_2 C1_2 C2_2 104(2) . . ?
C12_2 C1_2 C6_2 112.7(18) . . ?
C2_2 C1_2 C6_2 109(2) . . ?
C3_2 C2_2 C1_2 115(2) . . ?
C3_2 C2_2 C11_2 107(2) . . ?
C1_2 C2_2 C11_2 112(2) . . ?
C4_2 C3_2 C2_2 120(3) . . ?
C3_2 C4_2 C5_2 121(3) . . ?
C10_2 C5_2 C4_2 115.4(19) . . ?
C10_2 C5_2 C6_2 116(2) . . ?
C4_2 C5_2 C6_2 112(2) . . ?
C5_2 C6_2 C7_2 114(2) . . ?
C5_2 C6_2 C1_2 108.1(16) . . ?
C7_2 C6_2 C1_2 113(2) . . ?
C6_2 C7_2 C8_2 110(2) . . ?
C9_2 C8_2 C7_2 114(2) . . ?
C8_2 C9_2 C10_2 109(2) . . ?
C9_2 C10_2 C5_2 114(2) . . ?
O13_2 C12_2 C1_2 122(3) . . ?
O13_2 C12_2 C14_2 117(3) . . ?
C1_2 C12_2 C14_2 119(2) . . ?
C15_2 C14_2 C19_2 120.0 . . ?
C15_2 C14_2 C12_2 122.1(12) . . ?
C19_2 C14_2 C12_2 117.9(12) . . ?
O21_2 C15_2 N16_2 111.8(15) . . ?
O21_2 C15_2 C14_2 128.1(15) . . ?
N16_2 C15_2 C14_2 120.0 . . ?
O22_2 N16_2 C15_2 124.3(15) . . ?
O22_2 N16_2 C17_2 115.7(15) . . ?
C15_2 N16_2 C17_2 120.0 . . ?
C18_2 C17_2 N16_2 120.0 . . ?
C17_2 C18_2 C19_2 120.0 . . ?
C17_2 C18_2 C23_2 116.9(16) . . ?
C19_2 C18_2 C23_2 122.8(16) . . ?
O20_2 C19_2 C18_2 118.6(17) . . ?
O20_2 C19_2 C14_2 120.6(17) . . ?
C18_2 C19_2 C14_2 120.0 . . ?
O29_2 C23_2 C28_2 132(3) . . ?
O29_2 C23_2 C24_2 112(2) . . ?
C28_2 C23_2 C24_2 102(2) . . ?
O29_2 C23_2 C18_2 106.7(17) . . ?
C28_2 C23_2 C18_2 102(2) . . ?
C24_2 C23_2 C18_2 98(2) . . ?
O30_2 C24_2 C25_2 60.7(15) . . ?
O30_2 C24_2 C23_2 113(3) . . ?
C25_2 C24_2 C23_2 117(3) . . ?
O30_2 C25_2 C24_2 58.1(14) . . ?
O30_2 C25_2 C26_2 101(3) . . ?
C24_2 C25_2 C26_2 127(3) . . ?
O31_2 C26_2 C25_2 110(3) . . ?
O31_2 C26_2 C27_2 114(4) . . ?
C25_2 C26_2 C27_2 113(2) . . ?
C28_2 C27_2 C26_2 112(3) . . ?
C27_2 C28_2 C23_2 122(3) . . ?
C24_2 O30_2 C25_2 61.2(15) . . ?
C2_3 C1_3 C6_3 113(2) . . ?
C2_3 C1_3 C12_3 109(2) . . ?
C6_3 C1_3 C12_3 108.7(19) . . ?
C1_3 C2_3 C3_3 111(2) . . ?
C1_3 C2_3 C11_3 118(3) . . ?
C3_3 C2_3 C11_3 109(3) . . ?
C4_3 C3_3 C2_3 126(3) . . ?
C3_3 C4_3 C5_3 121(3) . . ?
C4_3 C5_3 C10_3 115(2) . . ?
C4_3 C5_3 C6_3 114(2) . . ?
C10_3 C5_3 C6_3 109(2) . . ?
C7_3 C6_3 C5_3 115(2) . . ?
C7_3 C6_3 C1_3 116(2) . . ?
C5_3 C6_3 C1_3 106.3(18) . . ?
C6_3 C7_3 C8_3 112(2) . . ?
C7_3 C8_3 C9_3 113(2) . . ?
C10_3 C9_3 C8_3 107(2) . . ?
C5_3 C10_3 C9_3 119(2) . . ?
O13_3 C12_3 C14_3 122(2) . . ?
O13_3 C12_3 C1_3 112(3) . . ?
C14_3 C12_3 C1_3 126(2) . . ?
C19_3 C14_3 C12_3 122(2) . . ?
C19_3 C14_3 C15_3 118(3) . . ?
C12_3 C14_3 C15_3 120(2) . . ?
O21_3 C15_3 N16_3 121(2) . . ?
O21_3 C15_3 C14_3 128(3) . . ?
N16_3 C15_3 C14_3 111(2) . . ?
C17_3 N16_3 C15_3 133(3) . . ?
C17_3 N16_3 O22_3 113(3) . . ?
C15_3 N16_3 O22_3 115(2) . . ?
N16_3 C17_3 C18_3 118(3) . . ?
C19_3 C18_3 C23_3 126(2) . . ?
C19_3 C18_3 C17_3 115(2) . . ?
C23_3 C18_3 C17_3 119(3) . . ?
C18_3 C19_3 O20_3 119(2) . . ?
C18_3 C19_3 C14_3 126(2) . . ?
O20_3 C19_3 C14_3 115(3) . . ?
O29_3 C23_3 C18_3 110(2) . . ?
O29_3 C23_3 C28_3 114(2) . . ?
C18_3 C23_3 C28_3 108.4(19) . . ?
O29_3 C23_3 C24_3 98(2) . . ?
C18_3 C23_3 C24_3 114(2) . . ?
C28_3 C23_3 C24_3 113(2) . . ?
O30_3 C24_3 C25_3 59.1(16) . . ?
O30_3 C24_3 C23_3 111(3) . . ?
C25_3 C24_3 C23_3 122(3) . . ?
O30_3 C25_3 C24_3 59.1(15) . . ?
O30_3 C25_3 C26_3 114(3) . . ?
C24_3 C25_3 C26_3 119(3) . . ?
O31_3 C26_3 C27_3 114(3) . . ?
O31_3 C26_3 C25_3 108(3) . . ?
C27_3 C26_3 C25_3 115(3) . . ?
C26_3 C27_3 C28_3 112(3) . . ?
C23_3 C28_3 C27_3 113(2) . . ?
C24_3 O30_3 C25_3 61.8(15) . . ?
C2_4 C1_4 C6_4 114(2) . . ?
C2_4 C1_4 C12_4 114(2) . . ?
C6_4 C1_4 C12_4 111(2) . . ?
C3_4 C2_4 C11_4 117(3) . . ?
C3_4 C2_4 C1_4 104(3) . . ?
C11_4 C2_4 C1_4 114(3) . . ?
C4_4 C3_4 C2_4 132(4) . . ?
C3_4 C4_4 C5_4 124(3) . . ?
C4_4 C5_4 C6_4 110(2) . . ?
C4_4 C5_4 C10_4 109(3) . . ?
C6_4 C5_4 C10_4 113(2) . . ?
C5_4 C6_4 C7_4 111(2) . . ?
C5_4 C6_4 C1_4 108.4(18) . . ?
C7_4 C6_4 C1_4 117(2) . . ?
C8_4 C7_4 C6_4 113(3) . . ?
C9_4 C8_4 C7_4 117(3) . . ?
C8_4 C9_4 C10_4 111(3) . . ?
C9_4 C10_4 C5_4 114(3) . . ?
O13_4 C12_4 C14_4 121(2) . . ?
O13_4 C12_4 C1_4 112(3) . . ?
C14_4 C12_4 C1_4 127(2) . . ?
C15_4 C14_4 C19_4 120.0 . . ?
C15_4 C14_4 C12_4 122.6(14) . . ?
C19_4 C14_4 C12_4 117.4(14) . . ?
O21_4 C15_4 N16_4 111.5(16) . . ?
O21_4 C15_4 C14_4 128.4(16) . . ?
N16_4 C15_4 C14_4 120.0 . . ?
O22_4 N16_4 C15_4 124.4(16) . . ?
O22_4 N16_4 C17_4 115.6(16) . . ?
C15_4 N16_4 C17_4 120.0 . . ?
C18_4 C17_4 N16_4 120.0 . . ?
C17_4 C18_4 C19_4 120.0 . . ?
C17_4 C18_4 C23_4 115.4(14) . . ?
C19_4 C18_4 C23_4 124.0(14) . . ?
C18_4 C19_4 C14_4 120.0 . . ?
C18_4 C19_4 O20_4 116.9(19) . . ?
C14_4 C19_4 O20_4 123(2) . . ?
O29_4 C23_4 C24_4 107(2) . . ?
O29_4 C23_4 C28_4 106(2) . . ?
C24_4 C23_4 C28_4 118(2) . . ?
O29_4 C23_4 C18_4 107.5(18) . . ?
C24_4 C23_4 C18_4 102.8(18) . . ?
C28_4 C23_4 C18_4 115(2) . . ?
O30_4 C24_4 C25_4 60.1(14) . . ?
O30_4 C24_4 C23_4 120(3) . . ?
C25_4 C24_4 C23_4 118(2) . . ?
O30_4 C25_4 C26_4 112(3) . . ?
O30_4 C25_4 C24_4 56.2(13) . . ?
C26_4 C25_4 C24_4 120(2) . . ?
O31_4 C26_4 C25_4 114(3) . . ?
O31_4 C26_4 C27_4 109(3) . . ?
C25_4 C26_4 C27_4 115(2) . . ?
C28_4 C27_4 C26_4 108(3) . . ?
C27_4 C28_4 C23_4 116(2) . . ?
C24_4 O30_4 C25_4 63.7(14) . . ?
C20_5 C1_5 C6_5 109.9(19) . . ?
C20_5 C1_5 C2_5 108(2) . . ?
C6_5 C1_5 C2_5 109(2) . . ?
C3_5 C2_5 C11_5 108(3) . . ?
C3_5 C2_5 C1_5 108(3) . . ?
C11_5 C2_5 C1_5 110(3) . . ?
C4_5 C3_5 C2_5 123(4) . . ?
C5_5 C4_5 C3_5 127(3) . . ?
C4_5 C5_5 C10_5 107(2) . . ?
C4_5 C5_5 C6_5 115(2) . . ?
C10_5 C5_5 C6_5 111(2) . . ?
C7_5 C6_5 C5_5 116(2) . . ?
C7_5 C6_5 C1_5 116(2) . . ?
C5_5 C6_5 C1_5 106.2(18) . . ?
C6_5 C7_5 C8_5 108(3) . . ?
C9_5 C8_5 C7_5 113(3) . . ?
C10_5 C9_5 C8_5 112(3) . . ?
C9_5 C10_5 C5_5 108(2) . . ?
C19_5 C14_5 C15_5 121(3) . . ?
C19_5 C14_5 C20_5 118(2) . . ?
C15_5 C14_5 C20_5 121(2) . . ?
O21_5 C15_5 N16_5 114(3) . . ?
O21_5 C15_5 C14_5 130(3) . . ?
N16_5 C15_5 C14_5 116(3) . . ?
C17_5 N16_5 C15_5 122(3) . . ?
C17_5 N16_5 O22_5 119(3) . . ?
C15_5 N16_5 O22_5 119(3) . . ?
N16_5 C17_5 C18_5 126(3) . . ?
C17_5 C18_5 C19_5 114(3) . . ?
C17_5 C18_5 C23_5 124(3) . . ?
C19_5 C18_5 C23_5 122(3) . . ?
O20_5 C19_5 C14_5 120(4) . . ?
O20_5 C19_5 C18_5 120(3) . . ?
C14_5 C19_5 C18_5 120(3) . . ?
O13_5 C20_5 C1_5 117(3) . . ?
O13_5 C20_5 C14_5 120(3) . . ?
C1_5 C20_5 C14_5 122(2) . . ?
O29_5 C23_5 C24_5 112(2) . . ?
O29_5 C23_5 C28_5 105(3) . . ?
C24_5 C23_5 C28_5 111(2) . . ?
O29_5 C23_5 C18_5 113(2) . . ?
C24_5 C23_5 C18_5 106(2) . . ?
C28_5 C23_5 C18_5 109(3) . . ?
O30_5 C24_5 C25_5 61.7(15) . . ?
O30_5 C24_5 C23_5 120(3) . . ?
C25_5 C24_5 C23_5 117(3) . . ?
O30_5 C25_5 C24_5 56.6(14) . . ?
O30_5 C25_5 C26_5 119(3) . . ?
C24_5 C25_5 C26_5 122(3) . . ?
C28_5 C27_5 C26_5 107(3) . . ?
O31_5 C26_5 C27_5 112(3) . . ?
O31_5 C26_5 C25_5 107(3) . . ?
C27_5 C26_5 C25_5 117(2) . . ?
C24_5 O30_5 C25_5 61.8(15) . . ?
C27_5 C28_5 C23_5 115(3) . . ?
C2_6 C1_6 C12_6 105(2) . . ?
C2_6 C1_6 C6_6 108(3) . . ?
C12_6 C1_6 C6_6 109(2) . . ?
C3_6 C2_6 C1_6 108(3) . . ?
C3_6 C2_6 C11_6 108(2) . . ?
C1_6 C2_6 C11_6 116(3) . . ?
C4_6 C3_6 C2_6 127(4) . . ?
C3_6 C4_6 C5_6 121(4) . . ?
C4_6 C5_6 C6_6 115(3) . . ?
C4_6 C5_6 C10_6 111(3) . . ?
C6_6 C5_6 C10_6 107(3) . . ?
C7_6 C6_6 C1_6 114(3) . . ?
C7_6 C6_6 C5_6 111(3) . . ?
C1_6 C6_6 C5_6 108(2) . . ?
C8_6 C7_6 C6_6 117(3) . . ?
C7_6 C8_6 C9_6 118(4) . . ?
C10_6 C9_6 C8_6 107(3) . . ?
C9_6 C10_6 C5_6 117(3) . . ?
O13_6 C12_6 C14_6 118(2) . . ?
O13_6 C12_6 C1_6 121(3) . . ?
C14_6 C12_6 C1_6 121(2) . . ?
C19_6 C14_6 C12_6 118(2) . . ?
C19_6 C14_6 C15_6 119(3) . . ?
C12_6 C14_6 C15_6 121(2) . . ?
O21_6 C15_6 N16_6 118(3) . . ?
O21_6 C15_6 C14_6 128(3) . . ?
N16_6 C15_6 C14_6 113(2) . . ?
C17_6 N16_6 C15_6 131(3) . . ?
C17_6 N16_6 O22_6 114(3) . . ?
C15_6 N16_6 O22_6 116(2) . . ?
N16_6 C17_6 C18_6 117(3) . . ?
C19_6 C18_6 C17_6 116(2) . . ?
C19_6 C18_6 C23_6 134(2) . . ?
C17_6 C18_6 C23_6 110(3) . . ?
O20_6 C19_6 C18_6 119(2) . . ?
O20_6 C19_6 C14_6 117(3) . . ?
C18_6 C19_6 C14_6 124(2) . . ?
O29_6 C23_6 C24_6 104(2) . . ?
O29_6 C23_6 C28_6 109(2) . . ?
C24_6 C23_6 C28_6 115(2) . . ?
O29_6 C23_6 C18_6 120(2) . . ?
C24_6 C23_6 C18_6 106(2) . . ?
C28_6 C23_6 C18_6 104(2) . . ?
O30_6 C24_6 C25_6 60.9(13) . . ?
O30_6 C24_6 C23_6 117(3) . . ?
C25_6 C24_6 C23_6 119(2) . . ?
O30_6 C25_6 C24_6 56.0(12) . . ?
O30_6 C25_6 C26_6 110(3) . . ?
C24_6 C25_6 C26_6 123(2) . . ?
O31_6 C26_6 C25_6 111(3) . . ?
O31_6 C26_6 C27_6 119(4) . . ?
C25_6 C26_6 C27_6 115(2) . . ?
C26_6 C27_6 C28_6 115(2) . . ?
C23_6 C28_6 C27_6 115(2) . . ?
C24_6 O30_6 C25_6 63.1(13) . . ?
 
_refine_diff_density_max    0.176
_refine_diff_density_min   -0.146
_refine_diff_density_rms    0.039

_shelx_res_file
;
REM Best SHELXD solution   FINAL CC 71.54
REM Fragments: 62 52 8 5 4 2 2 1 1 1 1 1 1 1 1 1 1 1 1 1 1
REM TITL Tang_Fis_merged           in space group C2   .
CELL 0.025100000 36.59    20.80    18.86  90.000  96.343  90.000
ZERR    4.00   0.0010   0.0020   0.0041   0.000   0.000   0.000
LATT -7
SYMM -X,Y,-Z
SFAC C 0.1361 0.3731 0.5482 3.2814 1.2266 13.0456 =
 0.5971 41.0202 0 0 0 0 0.68 12.011
SFAC N 0.1372 0.3287 0.5344 2.6733 1.0862 10.3165 =
 0.4547 32.7631 0 0 0 0 0.68 14.007
SFAC O 0.1433 0.3055 0.5103 2.2683 0.937 8.2625 =
 0.3923 25.6645 0 0 0 0 0.68 15.999
SFAC H 0.0367 0.5608 0.1269 3.7913 0.236 13.5557 =
 0.129 37.7229 0 0 0 0 0.23 1.008
UNIT 552 24 186 696
ACTA
L.S. 1
LIST 4
FMAP 2
PLAN 20
ISOR
SIMU
RIGU
REM DECALIN
DFIX_1 1.54 C1 C2
DFIX_1 1.54 C2 C3
DFIX_1 1.54 C2 C11
REM EPOXIDE CYCLOHEX
DFIX_1 1.54 C23 C24
DFIX_1 1.43 C26 O31
DFIX_1 1.51 C24 C25
DFIX_1 1.43 C24 O30
DFIX_1 1.43 C25 O30
DFIX_1 1.54 C25 C26
DFIX_1 1.54 C26 C27
DFIX_1 1.54 C27 C28
DFIX_1 1.54 C23 C28
DANG_1 2.66 C23 C25
DANG_1 2.66 C24 C26
DANG_1 2.66 C25 C27
DANG_1 2.66 C26 C28
DANG_1 2.66 C27 C23
DANG_1 2.50 C24 O29
DANG_1 2.50 C28 O29
DANG_1 2.50 C25 O31
DANG_1 2.50 C27 O31
DANG_1 2.56 C23 O30
DANG_1 2.56 C26 O30
REM DECALIN
DFIX_2 1.54 C1 C2
DFIX_2 1.54 C2 C3
DFIX_2 1.54 C2 C11
DFIX_2 1.54 C5 C6
DFIX_2 1.54 C6 C7
DFIX_2 1.54 C7 C8
DFIX_2 1.54 C8 C9
DFIX_2 1.54 C9 C10
DFIX_2 1.54 C10 C5
REM EPOXIDE CYCLOHEX
DFIX_2 3.110 C23 C26
DFIX_2 2.764 O30 O31
DFIX_2 5.531 O29 O31
DFIX_2 4.452 C23 O31
DFIX_2 3.802 O29 O30
DFIX_2 1.54 C23 C24
DFIX_2 1.43 C23 O29
DFIX_2 1.51 C24 C25
DFIX_2 1.43 C24 O30
DFIX_2 1.43 C25 O30
DFIX_2 1.54 C25 C26
DFIX_2 1.54 C26 C27
DFIX_2 1.54 C27 C28
DFIX_2 1.54 C23 C28
DFIX_2 1.43 C26 O31
DANG_2 2.66 C23 C25
DANG_2 2.66 C24 C26
DANG_2 2.66 C25 C27
DANG_2 2.66 C26 C28
DANG_2 2.66 C27 C23
DANG_2 2.50 C24 O29
DANG_2 2.50 C24 C28
DANG_2 2.50 C28 O29
DANG_2 2.50 C25 O31
DANG_2 2.50 C27 O31
DANG_2 2.56 C23 O30
DANG_2 2.56 C26 O30
REM DECALIN
DFIX_3 1.54 C5 C6
DFIX_3 1.54 C6 C7
DFIX_3 1.54 C7 C8
DFIX_3 1.54 C8 C9
DFIX_3 1.54 C9 C10
DFIX_3 1.54 C10 C5
REM EPOXIDE CYCLOHEX
DFIX_3 1.54 C23 C24
DFIX_3 1.43 C26 O31
DFIX_3 1.43 C23 O29
DFIX_3 1.51 C24 C25
DFIX_3 1.43 C24 O30
DFIX_3 1.43 C25 O30
DFIX_3 1.54 C25 C26
DFIX_3 1.54 C26 C27
DFIX_3 1.54 C27 C28
DFIX_3 1.54 C23 C28
DANG_3 2.66 C23 C25
DANG_3 2.66 C24 C26
DANG_3 2.66 C25 C27
DANG_3 2.66 C26 C28
DANG_3 2.66 C27 C23
DANG_3 2.50 C24 O29
DANG_3 2.50 C28 O29
DANG_3 2.50 C25 O31
DANG_3 2.50 C27 O31
DANG_3 2.56 C23 O30
DANG_3 2.56 C26 O30
REM DECALIN
DFIX_4 1.54 C1 C2
DFIX_4 1.54 C1 C6
DFIX_4 1.54 C5 C6
DFIX_4 1.54 C6 C7
DFIX_4 1.54 C7 C8
DFIX_4 1.54 C8 C9
DFIX_4 1.54 C9 C10
DFIX_4 1.54 C10 C5
REM EPOXIDE CYCLOHEX
DFIX_4 1.54 C23 C24
DFIX_4 1.43 C26 O31
DFIX_4 1.43 C23 O29
DFIX_4 1.51 C24 C25
DFIX_4 1.43 C24 O30
DFIX_4 1.43 C25 O30
DFIX_4 1.54 C25 C26
DFIX_4 1.54 C26 C27
DFIX_4 1.54 C27 C28
DFIX_4 1.54 C23 C28
DANG_4 2.66 C23 C25
DANG_4 2.66 C24 C26
DANG_4 2.66 C25 C27
DANG_4 2.66 C26 C28
DANG_4 2.66 C27 C23
DANG_4 2.50 C24 O29
DANG_4 2.50 C28 O29
DANG_4 2.50 C25 O31
DANG_4 2.50 C27 O31
DANG_4 2.56 C23 O30
DANG_4 2.56 C26 O30
REM DECALIN
DFIX_5 1.54 C2 C11
DFIX_5 1.54 C5 C6
DFIX_5 1.54 C6 C7
DFIX_5 1.54 C7 C8
DFIX_5 1.54 C8 C9
DFIX_5 1.54 C9 C10
DFIX_5 1.54 C10 C5
REM OTHER
DFIX_5 1.54 C18 C23
REM EPOXIDE CYCLOHEX
DFIX_5 1.54 C23 C24
DFIX_5 1.43 C26 O31
DFIX_5 1.43 C23 O29
DFIX_5 1.51 C24 C25
DFIX_5 1.43 C24 O30
DFIX_5 1.43 C25 O30
DFIX_5 1.54 C25 C26
DFIX_5 1.54 C26 C27
DFIX_5 1.54 C27 C28
DFIX_5 1.54 C23 C28
DANG_5 2.66 C23 C25
DANG_5 2.66 C24 C26
DANG_5 2.66 C25 C27
DANG_5 2.66 C26 C28
DANG_5 2.66 C27 C23
DANG_5 2.50 C24 O29
DANG_5 2.50 C28 O29
DANG_5 2.50 C25 O31
DANG_5 2.50 C27 O31
DANG_5 2.56 C23 O30
DANG_5 2.56 C26 O30
REM DECALIN
DFIX_6 1.54 C2 C11
DFIX_6 1.54 C2 C3
DFIX_6 1.34 C3 C4
REM OTHER
DFIX_6 1.54 C18 C23
REM EPOXIDE CYCLOHEX
DFIX_6 1.54 C23 C24
DFIX_6 1.43 C26 O31
DFIX_6 1.43 C23 O29
DFIX_6 1.51 C24 C25
DFIX_6 1.43 C24 O30
DFIX_6 1.43 C25 O30
DFIX_6 1.54 C25 C26
DFIX_6 1.54 C26 C27
DFIX_6 1.54 C27 C28
DFIX_6 1.54 C23 C28
DANG_6 2.66 C23 C25
DANG_6 2.66 C24 C26
DANG_6 2.66 C25 C27
DANG_6 2.66 C26 C28
DANG_6 2.66 C27 C23
DANG_6 2.50 C24 O29
DANG_6 2.50 C28 O29
DANG_6 2.50 C25 O31
DANG_6 2.50 C27 O31
DANG_6 2.56 C23 O30
DANG_6 2.56 C26 O30
WGHT    0.200000
EXTI   29.226528
FVAR       4.37014
O01   3    1.322311    0.652594    0.817401    11.00000    0.03136    0.03814 =
         0.15030    0.01499    0.03250    0.00985
O05   3    1.349367    0.653037    1.259136    11.00000    0.20976    0.24391 =
         1.17902   -0.06033   -0.03734    0.05781
O04   3    0.802728    0.495609    0.510567    11.00000    0.22895    0.13510 =
         0.33183    0.04001   -0.05300   -0.02072
O03   3    1.000000    0.518526    0.500000    10.50000    0.09140    0.18612 =
         0.45713    0.00000    0.05268    0.00000
O02   3    0.977584    0.651835    0.645446    11.00000    0.04483    0.04909 =
         0.12636   -0.01094    0.03020    0.01062
RESI 1
C1    1    1.233506    0.681930    0.985490    11.00000    0.05956    0.07667 =
         0.19942    0.00917    0.02335    0.01513
AFIX  13
H1    4    1.252657    0.661208    0.961062    11.00000   -1.20000
AFIX   0
C2    1    1.247263    0.688468    1.065359    11.00000    0.08885    0.08291 =
         0.20068   -0.00783    0.03104   -0.00203
AFIX  13
H2    4    1.229963    0.717326    1.085616    11.00000   -1.20000
AFIX   0
C3    1    1.247525    0.626299    1.108145    11.00000    0.08139    0.11544 =
         0.19484    0.02395    0.02168    0.00607
AFIX  43
H3    4    1.259788    0.624222    1.153985    11.00000   -1.20000
AFIX   0
C4    1    1.229247    0.572809    1.077900    11.00000    0.06084    0.10721 =
         0.23599    0.02275    0.02916    0.01195
AFIX  43
H4    4    1.232512    0.534197    1.102652    11.00000   -1.20000
AFIX   0
C5    1    1.206653    0.571950    1.014296    11.00000    0.05548    0.09440 =
         0.23521   -0.01050    0.03431   -0.01172
AFIX  13
H5    4    1.183370    0.552106    1.023647    11.00000   -1.20000
AFIX   0
C6    1    1.197187    0.637999    0.976298    11.00000    0.06557    0.09220 =
         0.21018   -0.00924    0.02972    0.00342
AFIX  13
H6    4    1.179967    0.659062    1.005133    11.00000   -1.20000
AFIX   0
C7    1    1.177034    0.635145    0.900722    11.00000    0.07453    0.09399 =
         0.22147   -0.01165    0.02474   -0.00021
AFIX  23
H7A   4    1.152407    0.619054    0.904124    11.00000   -1.20000
H7AB  4    1.174580    0.678773    0.882653    11.00000   -1.20000
AFIX   0
C8    1    1.194044    0.594653    0.845682    11.00000    0.09085    0.12253 =
         0.24550   -0.03953    0.04067   -0.00514
AFIX  23
H8A   4    1.216486    0.614564    0.833450    11.00000   -1.20000
H8AB  4    1.177075    0.590639    0.802611    11.00000   -1.20000
AFIX   0
C9    1    1.202760    0.525343    0.880588    11.00000    0.12028    0.12884 =
         0.24429   -0.01650    0.07977   -0.01203
AFIX  23
H9A   4    1.179673    0.503081    0.883420    11.00000   -1.20000
H9AB  4    1.216666    0.500735    0.849075    11.00000   -1.20000
AFIX   0
C10   1    1.224765    0.526241    0.956838    11.00000    0.09149    0.09951 =
         0.26408   -0.00704    0.07114   -0.01116
AFIX  23
H10A  4    1.249592    0.540987    0.952722    11.00000   -1.20000
H10B  4    1.226398    0.482643    0.975169    11.00000   -1.20000
AFIX   0
C11   1    1.285609    0.722053    1.077075    11.00000    0.11211    0.09252 =
         0.26410    0.00552    0.00492   -0.04269
AFIX 137
H11A  4    1.296758    0.713652    1.124664    11.00000   -1.50000
H11B  4    1.282565    0.767572    1.070396    11.00000   -1.50000
H11C  4    1.301085    0.705587    1.043370    11.00000   -1.50000
AFIX   0
C12   1    1.225412    0.746239    0.953360    11.00000    0.06851    0.07160 =
         0.22500    0.01695    0.04305    0.02394
O13   3    1.205885    0.781864    0.984501    11.00000    0.09860    0.05773 =
         0.22879    0.00987    0.06000    0.00582
C14   1    1.238842    0.764250    0.880038    11.00000    0.06289    0.07254 =
         0.19036   -0.00749    0.01753    0.00182
C15   1    1.266701    0.733181    0.852679    11.00000    0.06233    0.05822 =
         0.17744   -0.00874    0.01880   -0.00951
N16   2    1.275229    0.752399    0.784363    11.00000    0.07297    0.07292 =
         0.18632    0.00033    0.02510   -0.00012
C17   1    1.257437    0.802358    0.747341    11.00000    0.08785    0.08306 =
         0.16819   -0.00476    0.01077    0.00153
AFIX  43
H17   4    1.265083    0.815459    0.704197    11.00000   -1.20000
AFIX   0
C18   1    1.228107    0.833547    0.773716    11.00000    0.07350    0.08434 =
         0.18046   -0.01074    0.00344   -0.00210
C19   1    1.220494    0.823470    0.845483    11.00000    0.06759    0.07999 =
         0.20528    0.00843    0.03154    0.00010
O20   3    1.196584    0.856021    0.870599    11.00000    0.08440    0.07083 =
         0.23602    0.00668    0.03792    0.01410
AFIX  83
H20   4    1.194381    0.843762    0.911230    11.00000   -1.50000
AFIX   0
O21   3    1.287102    0.687565    0.880848    11.00000    0.07796    0.07498 =
         0.15618   -0.01201    0.02878   -0.00086
O22   3    1.303665    0.725242    0.755325    11.00000    0.09673    0.08717 =
         0.17144    0.03811    0.03318    0.01913
AFIX  83
H22   4    1.312598    0.696528    0.781548    11.00000   -1.50000
AFIX   0
C23   1    1.205538    0.889258    0.733072    11.00000    0.08117    0.11812 =
         0.20474    0.00963   -0.00300    0.01007
C24   1    1.220714    0.954474    0.762502    11.00000    0.15330    0.11590 =
         0.21864    0.00542    0.03251   -0.00511
AFIX  13
H24   4    1.211541    0.968277    0.806964    11.00000   -1.20000
AFIX   0
C25   1    1.231281    1.007790    0.715991    11.00000    0.15717    0.12649 =
         0.22943    0.01918    0.00121   -0.02969
AFIX  13
H25   4    1.228024    1.052090    0.731834    11.00000   -1.20000
AFIX   0
C26   1    1.234224    0.995929    0.635797    11.00000    0.15634    0.16755 =
         0.22843    0.03096    0.01303   -0.02890
AFIX  13
H26   4    1.210168    1.005467    0.609717    11.00000   -1.20000
AFIX   0
C27   1    1.241748    0.923030    0.626732    11.00000    0.17201    0.18081 =
         0.20535    0.00781    0.01402   -0.02524
AFIX  23
H27A  4    1.264475    0.911096    0.655089    11.00000   -1.20000
H27B  4    1.244221    0.913571    0.577126    11.00000   -1.20000
AFIX   0
C28   1    1.208542    0.883418    0.651959    11.00000    0.14394    0.11975 =
         0.21172    0.02594   -0.00131    0.02439
AFIX  23
H28A  4    1.185800    0.898427    0.625913    11.00000   -1.20000
H28B  4    1.211485    0.838464    0.640137    11.00000   -1.20000
AFIX   0
O29   3    1.167457    0.886116    0.747909    11.00000    0.06809    0.24444 =
         0.29435    0.02898   -0.01588    0.00252
AFIX  83
H29   4    1.158016    0.853030    0.730803    11.00000   -1.50000
AFIX   0
O30   3    1.258324    0.967322    0.758244    11.00000    0.14322    0.13087 =
         0.23393   -0.00318   -0.01416   -0.02937
O31   3    1.260028    1.038160    0.610611    11.00000    0.17551    0.18371 =
         0.25173    0.06395    0.00929   -0.03014
AFIX  83
H31   4    1.260482    1.032664    0.567664    11.00000   -1.50000
AFIX   0
RESI 2
C1    1    1.397888    0.787984    0.981037    11.00000    0.06245    0.05994 =
         0.21923   -0.00129    0.01192   -0.01092
AFIX  13
H1    4    1.376043    0.765498    0.958727    11.00000   -1.20000
AFIX   0
C2    1    1.404629    0.771557    1.060583    11.00000    0.10224    0.08771 =
         0.20654   -0.00407    0.01077   -0.00053
AFIX  13
H2    4    1.429456    0.786335    1.077851    11.00000   -1.20000
AFIX   0
C3    1    1.378220    0.802870    1.107102    11.00000    0.11341    0.10049 =
         0.20490   -0.01048    0.01593   -0.01045
AFIX  43
H3    4    1.376412    0.787429    1.152860    11.00000   -1.20000
AFIX   0
C4    1    1.355982    0.856645    1.079915    11.00000    0.07619    0.11811 =
         0.21681   -0.00384    0.01687   -0.00953
AFIX  43
H4    4    1.340606    0.876636    1.109275    11.00000   -1.20000
AFIX   0
C5    1    1.357173    0.881569    1.003496    11.00000    0.06630    0.05901 =
         0.21436   -0.02610    0.02184   -0.02246
AFIX  13
H5    4    1.359218    0.928289    1.009371    11.00000   -1.20000
AFIX   0
C6    1    1.392897    0.862697    0.972818    11.00000    0.07969    0.05715 =
         0.22050   -0.00570    0.03191   -0.00574
AFIX  13
H6    4    1.413275    0.883028    1.002748    11.00000   -1.20000
AFIX   0
C7    1    1.394821    0.885966    0.895450    11.00000    0.08530    0.08661 =
         0.24044    0.01713    0.05406   -0.00214
AFIX  23
H7A   4    1.415106    0.864982    0.875722    11.00000   -1.20000
H7AB  4    1.399065    0.931994    0.895193    11.00000   -1.20000
AFIX   0
C8    1    1.357725    0.869754    0.848605    11.00000    0.12444    0.07806 =
         0.23150   -0.00730    0.02561    0.01227
AFIX  23
H8A   4    1.358942    0.886239    0.800812    11.00000   -1.20000
H8AB  4    1.355193    0.823405    0.845157    11.00000   -1.20000
AFIX   0
C9    1    1.323642    0.897268    0.877351    11.00000    0.10008    0.06967 =
         0.23124    0.00548    0.01464    0.00243
AFIX  23
H9A   4    1.301775    0.884238    0.846954    11.00000   -1.20000
H9AB  4    1.324792    0.943859    0.877446    11.00000   -1.20000
AFIX   0
C10   1    1.321655    0.872702    0.953279    11.00000    0.08135    0.08377 =
         0.22308   -0.01227    0.01240   -0.01275
AFIX  23
H10A  4    1.315524    0.827323    0.951087    11.00000   -1.20000
H10B  4    1.301885    0.894966    0.973315    11.00000   -1.20000
AFIX   0
C11   1    1.403383    0.697061    1.073850    11.00000    0.10077    0.09628 =
         0.23805    0.00423    0.02946    0.00784
AFIX 137
H11A  4    1.404547    0.688879    1.124144    11.00000   -1.50000
H11B  4    1.423931    0.676973    1.055225    11.00000   -1.50000
H11C  4    1.380910    0.679812    1.050288    11.00000   -1.50000
AFIX   0
C12   1    1.431797    0.763840    0.951533    11.00000    0.06452    0.09442 =
         0.20139   -0.00232    0.00326    0.00583
O13   3    1.461742    0.781832    0.973454    11.00000    0.07951    0.09254 =
         0.27734   -0.04776   -0.03112    0.01380
AFIX  66
C14   1    1.427750    0.727325    0.876815    11.00000    0.05471    0.10307 =
         0.17904    0.02240    0.01410   -0.00316
C15   1    1.394792    0.699605    0.848336    11.00000    0.05787    0.08115 =
         0.17839    0.02895   -0.01467    0.00526
N16   2    1.392670    0.667890    0.783138    11.00000    0.06925    0.11037 =
         0.20944   -0.00671    0.00919   -0.01125
C17   1    1.423505    0.663896    0.746419    11.00000    0.08773    0.10234 =
         0.24721   -0.01214    0.03514   -0.00396
AFIX  43
H17   4    1.422084    0.642676    0.702797    11.00000   -1.20000
AFIX  65
C18   1    1.456463    0.691616    0.774898    11.00000    0.07296    0.13014 =
         0.24035   -0.01115    0.04288   -0.00143
C19   1    1.458586    0.723331    0.840096    11.00000    0.06916    0.08343 =
         0.23481    0.00292    0.04304   -0.00412
AFIX   0
O20   3    1.491399    0.740891    0.871026    11.00000    0.06831    0.12557 =
         0.25013   -0.03305    0.04208    0.00803
AFIX  83
H20   4    1.489078    0.758914    0.908937    11.00000   -1.50000
AFIX   0
O21   3    1.362363    0.696611    0.877791    11.00000    0.08237    0.05712 =
         0.16767    0.00196   -0.00255   -0.00292
O22   3    1.360794    0.641159    0.749027    11.00000    0.06464    0.11298 =
         0.21789   -0.04626    0.05154   -0.01148
AFIX  83
H22   4    1.343854    0.646642    0.773448    11.00000   -1.50000
AFIX   0

C23   1    1.492647    0.691188    0.721164    11.00000    0.13063    0.17652 =
         0.32069   -0.02375    0.10209    0.02765
C24   1    1.519369    0.644816    0.767578    11.00000    0.18389    0.17212 =
         0.39335    0.01845    0.15004    0.09526
AFIX  13
H24   4    1.528682    0.658663    0.815881    11.00000   -1.20000
AFIX   0
C25   1    1.543474    0.602636    0.728285    11.00000    0.29122    0.26467 =
         0.41604   -0.02276    0.18389    0.12252
AFIX  13
H25   4    1.567120    0.590012    0.754024    11.00000   -1.20000
AFIX   0
C26   1    1.536426    0.582137    0.648541    11.00000    0.37821    0.39083 =
         0.42762   -0.05144    0.16284    0.09375
AFIX  13
H26   4    1.557825    0.596594    0.625862    11.00000   -1.20000
AFIX   0
C27   1    1.502135    0.616468    0.608016    11.00000    0.28703    0.40551 =
         0.39792   -0.11055    0.17192    0.05450
AFIX  23
H27A  4    1.510439    0.649943    0.577767    11.00000   -1.20000
H27B  4    1.488155    0.585530    0.577553    11.00000   -1.20000
AFIX   0
C28   1    1.477170    0.646149    0.658989    11.00000    0.21062    0.36665 =
         0.35625   -0.11015    0.16639   -0.03626
AFIX  23
H28A  4    1.464853    0.610884    0.680194    11.00000   -1.20000
H28B  4    1.458310    0.670160    0.630017    11.00000   -1.20000
AFIX   0
O29   3    1.506749    0.755907    0.721306    11.00000    0.18607    0.17329 =
         0.40442    0.06989    0.18876    0.02656
AFIX  83
H29   4    1.490782    0.780055    0.702613    11.00000   -1.50000
AFIX   0
O30   3    1.509832    0.577618    0.756647    11.00000    0.28593    0.19256 =
         0.42796   -0.02601    0.14095    0.06514
O31   3    1.535705    0.510286    0.642721    11.00000    0.62318    0.39952 =
         0.51190   -0.11659    0.17077    0.10550
AFIX  83
H31   4    1.533320    0.499885    0.600525    11.00000   -1.50000
AFIX   0
RESI 3
C1    1    1.370101    0.488295    0.984483    11.00000    0.05929    0.06213 =
         0.20366    0.00929    0.00567    0.00473
AFIX  13
H1    4    1.369027    0.530788    0.961903    11.00000   -1.20000
AFIX   0
C2    1    1.365564    0.496033    1.061849    11.00000    0.06239    0.08123 =
         0.20166    0.02005    0.00942   -0.00185
AFIX  13
H2    4    1.363394    0.452385    1.080496    11.00000   -1.20000
AFIX   0
C3    1    1.399811    0.523836    1.101767    11.00000    0.09537    0.09698 =
         0.20242    0.00472    0.00307   -0.01296
AFIX  43
H3    4    1.397712    0.541383    1.146491    11.00000   -1.20000
AFIX   0
C4    1    1.432735    0.525474    1.078661    11.00000    0.07769    0.07420 =
         0.20381    0.00347   -0.00906    0.00050
AFIX  43
H4    4    1.452673    0.541769    1.108045    11.00000   -1.20000
AFIX   0
C5    1    1.438241    0.500909    1.004396    11.00000    0.08125    0.07154 =
         0.20525    0.01089    0.00917    0.00779
AFIX  13
H5    4    1.460679    0.474840    1.010426    11.00000   -1.20000
AFIX   0
C6    1    1.407296    0.455261    0.971875    11.00000    0.06470    0.07680 =
         0.20686    0.00601    0.01298    0.01006
AFIX  13
H6    4    1.409078    0.416455    1.001524    11.00000   -1.20000
AFIX   0
C7    1    1.410630    0.433009    0.895998    11.00000    0.07066    0.10433 =
         0.21149    0.00085    0.01274    0.01794
AFIX  23
H7A   4    1.388474    0.409980    0.878019    11.00000   -1.20000
H7AB  4    1.431172    0.403485    0.896377    11.00000   -1.20000
AFIX   0
C8    1    1.416449    0.489672    0.845526    11.00000    0.08899    0.09040 =
         0.20916    0.00047    0.01710    0.02962
AFIX  23
H8A   4    1.394504    0.516178    0.840354    11.00000   -1.20000
H8AB  4    1.420014    0.472886    0.798801    11.00000   -1.20000
AFIX   0
C9    1    1.450288    0.532338    0.873258    11.00000    0.07026    0.10724 =
         0.21688    0.03164    0.02898    0.01771
AFIX  23
H9A   4    1.472916    0.508124    0.872784    11.00000   -1.20000
H9AB  4    1.451513    0.569903    0.843135    11.00000   -1.20000
AFIX   0
C10   1    1.445025    0.552783    0.950142    11.00000    0.06599    0.07919 =
         0.21337    0.01578   -0.00228    0.00320
AFIX  23
H10A  4    1.466747    0.576592    0.968988    11.00000   -1.20000
H10B  4    1.424475    0.582473    0.947449    11.00000   -1.20000
AFIX   0
C11   1    1.332166    0.532453    1.081985    11.00000    0.09422    0.09883 =
         0.25686   -0.00462    0.03896   -0.00607
AFIX 137
H11A  4    1.335974    0.577787    1.076687    11.00000   -1.50000
H11B  4    1.328690    0.523160    1.130646    11.00000   -1.50000
H11C  4    1.310757    0.519396    1.051328    11.00000   -1.50000
AFIX   0
C12   1    1.336243    0.444535    0.947190    11.00000    0.06238    0.06844 =
         0.23214    0.01400    0.01234   -0.01752
O13   3    1.333723    0.392963    0.979022    11.00000    0.07691    0.10346 =
         0.23633    0.04045    0.00124   -0.01172
C14   1    1.312546    0.460141    0.879648    11.00000    0.05140    0.07165 =
         0.23053    0.00663    0.01647    0.00476
C15   1    1.313334    0.528978    0.847772    11.00000    0.05379    0.08177 =
         0.19154    0.00368    0.03286    0.00056
N16   2    1.291086    0.533185    0.786675    11.00000    0.05473    0.08729 =
         0.21354   -0.00453    0.00803   -0.00035
C17   1    1.268546    0.491125    0.750857    11.00000    0.08344    0.09035 =
         0.24200   -0.00316    0.00046   -0.01734
AFIX  43
H17   4    1.253921    0.502945    0.709429    11.00000   -1.20000
AFIX   0
C18   1    1.267636    0.423087    0.780261    11.00000    0.06243    0.09621 =
         0.24089    0.01164    0.02124   -0.00391
C19   1    1.290099    0.412979    0.841887    11.00000    0.06520    0.08481 =
         0.24299    0.00952    0.01918   -0.01392
O20   3    1.288928    0.353882    0.875914    11.00000    0.07368    0.06602 =
         0.27869    0.01626    0.03408    0.00532
AFIX  83
H20   4    1.303437    0.354020    0.912306    11.00000   -1.50000
AFIX   0
O21   3    1.330793    0.576266    0.873355    11.00000    0.05222    0.07138 =
         0.18978    0.02649    0.00248   -0.00704
O22   3    1.289369    0.596653    0.753961    11.00000    0.05540    0.10016 =
         0.20641    0.00263   -0.00149    0.00038
AFIX  83
H22   4    1.303551    0.620949    0.777605    11.00000   -1.50000
AFIX   0
C23   1    1.240978    0.375146    0.742895    11.00000    0.08735    0.11877 =
         0.26578   -0.01585    0.00902   -0.01183
C24   1    1.211002    0.406352    0.689328    11.00000    0.14095    0.17790 =
         0.27906   -0.04260   -0.03548    0.02450
AFIX  13
H24   4    1.193687    0.435536    0.709056    11.00000   -1.20000
AFIX   0
C25   1    1.198602    0.376077    0.619110    11.00000    0.19025    0.18930 =
         0.31576   -0.07469   -0.05338    0.02261
AFIX  13
H25   4    1.173895    0.387025    0.596943    11.00000   -1.20000
AFIX   0
C26   1    1.214209    0.308469    0.601102    11.00000    0.20600    0.22516 =
         0.32496   -0.08580   -0.02992    0.06490
AFIX  13
H26   4    1.192882    0.280525    0.588845    11.00000   -1.20000
AFIX   0
C27   1    1.238007    0.275481    0.663610    11.00000    0.15268    0.19526 =
         0.32955   -0.06268   -0.00370    0.01770
AFIX  23
H27A  4    1.253344    0.243073    0.644688    11.00000   -1.20000
H27B  4    1.222032    0.253979    0.693861    11.00000   -1.20000
AFIX   0
C28   1    1.262855    0.323938    0.709198    11.00000    0.10253    0.15400 =
         0.27526   -0.01723    0.01238    0.01704
AFIX  23
H28A  4    1.277761    0.300728    0.746508    11.00000   -1.20000
H28B  4    1.279333    0.344463    0.679214    11.00000   -1.20000
AFIX   0
O29   3    1.216548    0.349598    0.792670    11.00000    0.12879    0.14038 =
         0.31626   -0.03128    0.05062   -0.05899
AFIX  83
H29   4    1.228866    0.332459    0.826439    11.00000   -1.50000
AFIX   0
O30   3    1.225876    0.427012    0.624868    11.00000    0.20980    0.19792 =
         0.28426   -0.02532   -0.01976    0.00067
O31   3    1.232352    0.314759    0.537009    11.00000    0.33128    0.41532 =
         0.33192   -0.06981    0.02357    0.10071
AFIX  83
H31   4    1.218126    0.330876    0.505291    11.00000   -1.50000
AFIX   0
RESI 4
C1    1    1.059807    0.788128    0.807195    11.00000    0.08897    0.09322 =
         0.18784   -0.03285    0.03589   -0.00745
AFIX  13
H1    4    1.036255    0.772730    0.783456    11.00000   -1.20000
AFIX   0
C2    1    1.060347    0.768138    0.886038    11.00000    0.10915    0.12772 =
         0.17947   -0.03251    0.02074   -0.00796
AFIX  13
H2    4    1.084564    0.779619    0.910181    11.00000   -1.20000
AFIX   0
C3    1    1.034783    0.808842    0.912005    11.00000    0.12249    0.16205 =
         0.18337   -0.01994    0.04415    0.01152
AFIX  43
H3    4    1.027997    0.796558    0.956122    11.00000   -1.20000
AFIX   0
C4    1    1.018265    0.861705    0.885962    11.00000    0.10838    0.13582 =
         0.20330   -0.04452    0.03772   -0.00004
AFIX  43
H4    4    1.001350    0.881206    0.912422    11.00000   -1.20000
AFIX   0

C5    1    1.024647    0.890551    0.820438    11.00000    0.09012    0.09842 =
         0.21621   -0.03119    0.01471    0.00923
AFIX  13
H5    4    1.028462    0.936704    0.828674    11.00000   -1.20000
AFIX   0
C6    1    1.059768    0.862602    0.794933    11.00000    0.07364    0.10361 =
         0.20247   -0.01973    0.02187   -0.00921
AFIX  13
H6    4    1.080501    0.880043    0.826429    11.00000   -1.20000
AFIX   0
C7    1    1.064559    0.885851    0.718616    11.00000    0.12605    0.13337 =
         0.21257   -0.00308    0.03642   -0.02879
AFIX  23
H7A   4    1.071821    0.930723    0.720501    11.00000   -1.20000
H7AB  4    1.084185    0.861474    0.700680    11.00000   -1.20000
AFIX   0
C8    1    1.030062    0.878661    0.667605    11.00000    0.16045    0.10817 =
         0.19418   -0.00865    0.02517   -0.00276
AFIX  23
H8A   4    1.034189    0.899294    0.623057    11.00000   -1.20000
H8AB  4    1.026333    0.833225    0.657720    11.00000   -1.20000
AFIX   0
C9    1    0.995607    0.904933    0.690620    11.00000    0.13119    0.10465 =
         0.23658    0.00091   -0.00721    0.01345
AFIX  23
H9A   4    0.974862    0.891129    0.657654    11.00000   -1.20000
H9AB  4    0.996465    0.951535    0.689820    11.00000   -1.20000
AFIX   0
C10   1    0.990390    0.881917    0.766135    11.00000    0.09044    0.12217 =
         0.23112   -0.02778    0.00881    0.02356
AFIX  23
H10A  4    0.983737    0.836760    0.764096    11.00000   -1.20000
H10B  4    0.970098    0.905429    0.782807    11.00000   -1.20000
AFIX   0
C11   1    1.055354    0.697668    0.896204    11.00000    0.16899    0.14327 =
         0.19585    0.00482    0.02924    0.00300
AFIX 137
H11A  4    1.048359    0.677767    0.850804    11.00000   -1.50000
H11B  4    1.036475    0.690648    0.926884    11.00000   -1.50000
H11C  4    1.078014    0.679250    0.917466    11.00000   -1.50000
AFIX   0
C12   1    1.090939    0.753831    0.766339    11.00000    0.06727    0.12378 =
         0.19832   -0.01952    0.02635    0.00748
O13   3    1.123524    0.768701    0.794075    11.00000    0.07808    0.14815 =
         0.24147   -0.03646    0.00239    0.00200
AFIX  66
C14   1    1.085532    0.714423    0.701893    11.00000    0.09187    0.09410 =
         0.21217   -0.02696    0.03280   -0.00694
C15   1    1.051581    0.688595    0.676320    11.00000    0.08678    0.11157 =
         0.18631   -0.01544    0.02520    0.00483
N16   2    1.048005    0.652347    0.614022    11.00000    0.08997    0.10070 =
         0.19148   -0.01681    0.01712    0.01791
C17   1    1.078380    0.641927    0.577297    11.00000    0.11358    0.10978 =
         0.21861   -0.03797    0.03426    0.01370
AFIX  43
H17   4    1.075987    0.617675    0.535615    11.00000   -1.20000
AFIX  65
C18   1    1.112331    0.667755    0.602869    11.00000    0.11413    0.14341 =
         0.24223   -0.05318    0.04729   -0.00911
C19   1    1.115908    0.704003    0.665167    11.00000    0.11228    0.09680 =
         0.22986   -0.03293    0.04528   -0.00690
AFIX   0
O20   3    1.151605    0.721113    0.693083    11.00000    0.11051    0.14204 =
         0.26816   -0.04026    0.04033   -0.01670
AFIX  83
H20   4    1.150830    0.741530    0.730081    11.00000   -1.50000
AFIX   0
O21   3    1.019232    0.690733    0.706750    11.00000    0.08914    0.06203 =
         0.18650   -0.02948    0.02897    0.00691
O22   3    1.015399    0.626264    0.583269    11.00000    0.10111    0.12293 =
         0.16596   -0.03358    0.03465    0.01486
AFIX  83
H22   4    0.998749    0.636082    0.606946    11.00000   -1.50000
AFIX   0
C23   1    1.147971    0.643395    0.560478    11.00000    0.10883    0.13600 =
         0.22146   -0.03603    0.03216    0.00026
C24   1    1.152635    0.698627    0.509349    11.00000    0.12941    0.14573 =
         0.23814   -0.01620    0.02975    0.00673
AFIX  13
H24   4    1.134083    0.701574    0.467825    11.00000   -1.20000
AFIX   0
C25   1    1.191532    0.717171    0.496736    11.00000    0.13537    0.18224 =
         0.24485    0.00321    0.04278    0.01384
AFIX  13
H25   4    1.195754    0.730811    0.448575    11.00000   -1.20000
AFIX   0
C26   1    1.223875    0.691396    0.544637    11.00000    0.11942    0.25166 =
         0.27372    0.01367    0.00811   -0.01778
AFIX  13
H26   4    1.231634    0.652509    0.521062    11.00000   -1.20000
AFIX   0
C27   1    1.215192    0.669165    0.620879    11.00000    0.10749    0.23099 =
         0.29893    0.04071    0.03529    0.00072
AFIX  23
H27A  4    1.236684    0.649055    0.646363    11.00000   -1.20000
H27B  4    1.208410    0.705894    0.648294    11.00000   -1.20000
AFIX   0
C28   1    1.183115    0.620775    0.610687    11.00000    0.12820    0.14644 =
         0.29725    0.00149    0.02242    0.03495
AFIX  23
H28A  4    1.175653    0.610758    0.657213    11.00000   -1.20000
H28B  4    1.192109    0.581321    0.591374    11.00000   -1.20000
AFIX   0
O29   3    1.135634    0.587453    0.516476    11.00000    0.13810    0.14870 =
         0.34232   -0.09921    0.06328   -0.03464
AFIX  83
H29   4    1.115258    0.594774    0.495332    11.00000   -1.50000
AFIX   0
O30   3    1.167586    0.757402    0.535906    11.00000    0.15509    0.14906 =
         0.26136   -0.01939    0.03729   -0.00072
O31   3    1.256030    0.733687    0.552075    11.00000    0.12783    0.33841 =
         0.35082    0.10679    0.01467   -0.05987
AFIX  83
H31   4    1.251551    0.766202    0.528095    11.00000   -1.50000
AFIX   0
RESI 5
C1    1    0.885102    0.693641    0.806648    11.00000    0.07533    0.08096 =
         0.22194   -0.01013    0.04033   -0.00397
AFIX  13
H1    4    0.903212    0.669312    0.782948    11.00000   -1.20000
AFIX   0
C2    1    0.899521    0.703278    0.891136    11.00000    0.12952    0.14695 =
         0.23657    0.02289   -0.01689   -0.01970
AFIX  13
H2    4    0.883905    0.734167    0.912946    11.00000   -1.20000
AFIX   0
C3    1    0.898247    0.639226    0.926486    11.00000    0.10725    0.16391 =
         0.23519    0.03821    0.01885   -0.00535
AFIX  43
H3    4    0.911776    0.633521    0.970755    11.00000   -1.20000
AFIX   0

C4    1    0.877550    0.586927    0.896098    11.00000    0.08327    0.13950 =
         0.22988    0.03274    0.06922    0.00179
AFIX  43
H4    4    0.879497    0.548456    0.921360    11.00000   -1.20000
AFIX   0
C5    1    0.854878    0.586922    0.833236    11.00000    0.06101    0.10520 =
         0.25691    0.00498    0.05097   -0.00751
AFIX  13
H5    4    0.831485    0.567318    0.842292    11.00000   -1.20000
AFIX   0
C6    1    0.846294    0.655679    0.800265    11.00000    0.08013    0.09285 =
         0.24957   -0.00301    0.02473   -0.01836
AFIX  13
H6    4    0.831197    0.677585    0.832652    11.00000   -1.20000
AFIX   0
C7    1    0.823840    0.656682    0.726334    11.00000    0.08233    0.11109 =
         0.24743   -0.01615    0.03561   -0.03676
AFIX  23
H7A   4    0.823553    0.699765    0.706595    11.00000   -1.20000
H7AB  4    0.798675    0.643774    0.730323    11.00000   -1.20000
AFIX   0
C8    1    0.841871    0.609531    0.677097    11.00000    0.09230    0.12792 =
         0.26608   -0.00885    0.04160   -0.01690
AFIX  23
H8A   4    0.826476    0.606456    0.631935    11.00000   -1.20000
H8AB  4    0.865475    0.626773    0.667587    11.00000   -1.20000
AFIX   0
C9    1    0.847692    0.541448    0.709067    11.00000    0.11936    0.12020 =
         0.26444   -0.00749    0.04715   -0.02310
AFIX  23
H9A   4    0.824069    0.523262    0.716975    11.00000   -1.20000
H9AB  4    0.858551    0.514099    0.675381    11.00000   -1.20000
AFIX   0
C10   1    0.872898    0.542731    0.780147    11.00000    0.07744    0.10834 =
         0.26365    0.00201    0.05863   -0.02529
AFIX  23
H10A  4    0.896956    0.559190    0.772508    11.00000   -1.20000
H10B  4    0.875894    0.499595    0.799462    11.00000   -1.20000
AFIX   0
C11   1    0.941324    0.727214    0.899646    11.00000    0.18389    0.18616 =
         0.22271    0.02570   -0.01650   -0.08113
AFIX 137
H11A  4    0.950414    0.728856    0.949348    11.00000   -1.50000
H11B  4    0.942643    0.769284    0.879150    11.00000   -1.50000
H11C  4    0.956002    0.697866    0.875546    11.00000   -1.50000
AFIX   0
O13   3    0.860237    0.796880    0.801754    11.00000    0.10502    0.06669 =
         0.19547   -0.00613    0.04393   -0.00920
C14   1    0.895105    0.777675    0.705676    11.00000    0.07930    0.06612 =
         0.17716   -0.02619    0.01226   -0.00930
C15   1    0.925064    0.740790    0.679999    11.00000    0.06698    0.08408 =
         0.16830   -0.01071    0.01524   -0.01357
N16   2    0.935358    0.758637    0.613569    11.00000    0.09857    0.09359 =
         0.16315   -0.00425    0.01764   -0.00763
C17   1    0.921735    0.810703    0.579445    11.00000    0.12152    0.08567 =
         0.19502    0.00341    0.00316   -0.01930
AFIX  43
H17   4    0.931562    0.821802    0.537703    11.00000   -1.20000
AFIX   0

C18   1    0.893430    0.851217    0.600827    11.00000    0.10615    0.10808 =
         0.21328    0.01221   -0.00514    0.00033
C19   1    0.881470    0.833490    0.670391    11.00000    0.09250    0.11236 =
         0.20023    0.00160   -0.00478    0.02196
O20   3    0.857623    0.871414    0.700630    11.00000    0.08320    0.11117 =
         0.26167    0.03670    0.03227    0.02979
AFIX  83
H20   4    0.852920    0.855255    0.738229    11.00000   -1.50000
AFIX   0
C20   1    0.879760    0.759447    0.773923    11.00000    0.08897    0.09136 =
         0.21410    0.00111    0.04449    0.01138
O21   3    0.941221    0.693336    0.705397    11.00000    0.08022    0.09002 =
         0.13287   -0.01650    0.04402    0.00401
O22   3    0.962495    0.722036    0.584099    11.00000    0.09683    0.11262 =
         0.18968    0.01170    0.03669   -0.01892
AFIX  83
H22   4    0.967171    0.689773    0.608405    11.00000   -1.50000
AFIX   0
C23   1    0.877046    0.911540    0.556910    11.00000    0.13595    0.10762 =
         0.27437    0.04312    0.03213   -0.00241
C24   1    0.883681    0.969888    0.606819    11.00000    0.20134    0.10960 =
         0.29043    0.02778    0.05776   -0.01248
AFIX  13
H24   4    0.868448    0.971740    0.646370    11.00000   -1.20000
AFIX   0
C25   1    0.891129    1.032270    0.573933    11.00000    0.24310    0.11846 =
         0.30788    0.03672    0.02542   -0.02785
AFIX  13
H25   4    0.880769    1.070006    0.595566    11.00000   -1.20000
AFIX   0
C27   1    0.886538    0.978907    0.444622    11.00000    0.27450    0.16373 =
         0.28873    0.04671    0.02758   -0.03857
AFIX  23
H27A  4    0.860432    0.978173    0.428507    11.00000   -1.20000
H27B  4    0.899988    0.980231    0.403116    11.00000   -1.20000
AFIX   0
C26   1    0.896111    1.038637    0.492658    11.00000    0.28854    0.13392 =
         0.31968    0.05290    0.03806   -0.05351
AFIX  13
H26   4    0.879723    1.073316    0.473697    11.00000   -1.20000
AFIX   0
O29   3    0.839101    0.904149    0.531340    11.00000    0.13595    0.14980 =
         0.33347    0.05336   -0.01526    0.02756
AFIX  83
H29   4    0.836279    0.871048    0.507754    11.00000   -1.50000
AFIX   0
O30   3    0.918921    0.996184    0.620717    11.00000    0.22558    0.18743 =
         0.31176    0.01692    0.00078   -0.02448
C28   1    0.897216    0.919894    0.488920    11.00000    0.20606    0.13896 =
         0.26205    0.01730    0.05015    0.00089
AFIX  23
H28A  4    0.923475    0.921447    0.503415    11.00000   -1.20000
H28B  4    0.892428    0.882203    0.459050    11.00000   -1.20000
AFIX   0
O31   3    0.933113    1.060512    0.487889    11.00000    0.33279    0.23800 =
         0.42752    0.02906    0.10607   -0.09904
AFIX  83
H31   4    0.936939    1.093305    0.511687    11.00000   -1.50000
AFIX   0
RESI 6
C1    1    1.019388    0.476240    0.800770    11.00000    0.06773    0.10591 =
         0.22140   -0.01798    0.00621   -0.01055
AFIX  13
H1    4    1.020045    0.516937    0.774759    11.00000   -1.20000
AFIX   0
C2    1    1.015950    0.487646    0.880523    11.00000    0.11682    0.12354 =
         0.22468   -0.02509   -0.00338    0.00582
AFIX  13
H2    4    1.011362    0.446125    0.902449    11.00000   -1.20000
AFIX   0
C3    1    1.052232    0.513447    0.915356    11.00000    0.11825    0.13810 =
         0.24480   -0.01058   -0.02890    0.00144
AFIX  43
H3    4    1.051867    0.533521    0.959333    11.00000   -1.20000
AFIX   0
C4    1    1.084984    0.510363    0.889302    11.00000    0.12452    0.14501 =
         0.24586    0.00924   -0.02766    0.00817
AFIX  43
H4    4    1.105382    0.530138    0.913897    11.00000   -1.20000
AFIX   0

C5    1    1.088756    0.476950    0.824102    11.00000    0.09757    0.10890 =
         0.24973    0.01709   -0.02600    0.02409
AFIX  13
H5    4    1.109915    0.448001    0.832664    11.00000   -1.20000
AFIX   0
C6    1    1.054596    0.435624    0.794503    11.00000    0.08649    0.10766 =
         0.22771    0.02496    0.00587    0.01687
AFIX  13
H6    4    1.053654    0.398085    0.825650    11.00000   -1.20000
AFIX   0
C7    1    1.058354    0.411031    0.719188    11.00000    0.08471    0.10528 =
         0.25752   -0.00894    0.03420    0.00099
AFIX  23
H7A   4    1.077671    0.378883    0.722437    11.00000   -1.20000
H7AB  4    1.035599    0.389672    0.701457    11.00000   -1.20000
AFIX   0
C8    1    1.066011    0.455954    0.669983    11.00000    0.09825    0.13587 =
         0.23772   -0.00569    0.03212   -0.00132
AFIX  23
H8A   4    1.044636    0.483490    0.660474    11.00000   -1.20000
H8AB  4    1.069221    0.433637    0.625937    11.00000   -1.20000
AFIX   0
C9    1    1.100143    0.499733    0.688989    11.00000    0.11665    0.13952 =
         0.26589    0.00911    0.00761   -0.00488
AFIX  23
H9A   4    1.122582    0.474838    0.689397    11.00000   -1.20000
H9AB  4    1.100616    0.533904    0.654103    11.00000   -1.20000
AFIX   0
C10   1    1.097052    0.527236    0.761181    11.00000    0.06561    0.14271 =
         0.25418    0.01184   -0.02096   -0.00647
AFIX  23
H10A  4    1.077600    0.559142    0.756578    11.00000   -1.20000
H10B  4    1.119814    0.549555    0.776688    11.00000   -1.20000
AFIX   0
C11   1    0.984600    0.536186    0.897794    11.00000    0.12243    0.25861 =
         0.25941   -0.00602    0.03001    0.06862
AFIX 137
H11A  4    0.987736    0.576419    0.874268    11.00000   -1.50000
H11B  4    0.986142    0.543019    0.948377    11.00000   -1.50000
H11C  4    0.960976    0.518451    0.881173    11.00000   -1.50000
AFIX   0
C12   1    0.985183    0.435583    0.772951    11.00000    0.07067    0.09163 =
         0.21003    0.00322    0.00351   -0.00424
O13   3    0.978953    0.385370    0.799640    11.00000    0.10042    0.10274 =
         0.23842    0.01476    0.02577   -0.00895
C14   1    0.958849    0.458837    0.712744    11.00000    0.06948    0.08139 =
         0.18333   -0.01364    0.01387   -0.00680
C15   1    0.962449    0.524143    0.681418    11.00000    0.05569    0.09263 =
         0.17420   -0.00200    0.02833    0.00027
N16   2    0.939785    0.533587    0.619600    11.00000    0.05762    0.10270 =
         0.19886    0.00144    0.01119   -0.00396
C17   1    0.916835    0.492460    0.580480    11.00000    0.08581    0.11094 =
         0.20049    0.00276    0.01559   -0.02784
AFIX  43
H17   4    0.904690    0.504233    0.536469    11.00000   -1.20000
AFIX   0

C18   1    0.912022    0.426762    0.611944    11.00000    0.09418    0.10672 =
         0.21315   -0.00154    0.00183   -0.02171
C19   1    0.935003    0.412860    0.675331    11.00000    0.06220    0.08693 =
         0.19991   -0.00201    0.01871   -0.01771
O20   3    0.930621    0.357095    0.708336    11.00000    0.10367    0.07927 =
         0.27579    0.01430    0.03655   -0.01738
AFIX  83
H20   4    0.913539    0.337123    0.686777    11.00000   -1.50000
AFIX   0
O21   3    0.980378    0.571314    0.708685    11.00000    0.06258    0.08169 =
         0.19775    0.01369    0.02504    0.00203
O22   3    0.941539    0.593724    0.589367    11.00000    0.07599    0.10849 =
         0.18762   -0.00278   -0.02573   -0.00559
AFIX  83
H22   4    0.955120    0.616851    0.615816    11.00000   -1.50000
AFIX   0
SAME_1 C23 > C28 O29 > O31
C23   1    0.884073    0.385840    0.560332    11.00000    0.11364    0.12138 =
         0.25201   -0.00665    0.00330   -0.02979
C24   1    0.908043    0.337972    0.522387    11.00000    0.21399    0.15617 =
         0.32914   -0.07194    0.02976   -0.00759
AFIX  13
H24   4    0.921446    0.355962    0.484783    11.00000   -1.20000
AFIX   0

C25   1    0.894959    0.269663    0.511839    11.00000    0.25312    0.16196 =
         0.37708   -0.04401   -0.01459   -0.01552
AFIX  13
H25   4    0.900921    0.247393    0.468792    11.00000   -1.20000
AFIX   0
C26   1    0.864018    0.241151    0.551021    11.00000    0.32430    0.20743 =
         0.41044   -0.00635    0.00885   -0.05400
AFIX  13
H26   4    0.847797    0.220856    0.512603    11.00000   -1.20000
AFIX   0
C27   1    0.838792    0.290742    0.581907    11.00000    0.33024    0.22879 =
         0.39787   -0.03444    0.07381   -0.11663
AFIX  23
H27A  4    0.827399    0.270634    0.620340    11.00000   -1.20000
H27B  4    0.819324    0.302370    0.544997    11.00000   -1.20000
AFIX   0

C28   1    0.858745    0.354013    0.611225    11.00000    0.10404    0.19619 =
         0.30940    0.02989   -0.01236   -0.07310
AFIX  23
H28A  4    0.840207    0.384985    0.621419    11.00000   -1.20000
H28B  4    0.873401    0.344075    0.655916    11.00000   -1.20000
AFIX   0
O29   3    0.861418    0.417251    0.501281    11.00000    0.19614    0.15747 =
         0.26975    0.00641   -0.04650   -0.03766
AFIX  83
H29   4    0.850964    0.448406    0.516458    11.00000   -1.50000
AFIX   0
O30   3    0.925958    0.289293    0.564078    11.00000    0.25512    0.18351 =
         0.35377   -0.08564   -0.01266    0.02807
O31   3    0.877126    0.188442    0.593960    11.00000    0.32606    0.29192 =
         0.48172    0.06684   -0.07523   -0.08605
AFIX  83
H31   4    0.860643    0.161878    0.595103    11.00000   -1.50000
RESI 0

AFIX   0
HKLF 4


REM
REM wR2 = 0.3631, GooF = S = 1.128, Restrained GooF = 1.007 for all data
REM R1 = 0.1373 for 5871 Fo > 4sig(Fo) and 0.2006 for all 11188 data
REM 1699 parameters refined using 4212 restraints

END

WGHT      0.2000      0.0000

REM Highest difference peak  0.176,  deepest hole -0.146,  1-sigma level  0.039
Q1    1   1.0000  0.8062  0.5000  10.50000  0.05    0.18
Q2    1   1.3253  0.4414  0.9211  11.00000  0.05    0.15
Q3    1   1.3964  0.7760  1.0428  11.00000  0.05    0.14
Q4    1   0.8059  0.1278  0.6095  11.00000  0.05    0.14
Q5    1   1.3017  0.5033  0.8529  11.00000  0.05    0.14
Q6    1   0.9773  0.6538  0.6763  11.00000  0.05    0.14
Q7    1   0.9494  0.5150  0.6706  11.00000  0.05    0.14
Q8    1   1.1859  0.3105  0.6967  11.00000  0.05    0.14
Q9    1   1.2383  0.6875  1.0277  11.00000  0.05    0.13
Q10   1   1.5000  0.7556  0.5000  10.50000  0.05    0.13
Q11   1   1.3978  0.6673  0.7996  11.00000  0.05    0.13
Q12   1   1.5239  0.7179  0.5927  11.00000  0.05    0.13
Q13   1   1.2820  0.4428  0.8172  11.00000  0.05    0.13
Q14   1   1.2909  0.6436  0.4381  11.00000  0.05    0.13
Q15   1   1.2001  0.7822  0.9457  11.00000  0.05    0.12
Q16   1   1.2322  0.7875  0.8852  11.00000  0.05    0.12
Q17   1   0.9682  0.4365  0.7253  11.00000  0.05    0.12
Q18   1   1.2011  0.5926  0.9549  11.00000  0.05    0.12
Q19   1   1.2853  0.8735  0.8414  11.00000  0.05    0.12
Q20   1   0.9804  0.3811  0.5123  11.00000  0.05    0.11
;
_shelx_res_checksum   47827

_shelx_hkl_file
;
   0  -2   0  81519.  14621.   1
   0  -2   0  55902.  18710.   1
   0  -2   0  80013.  16895.   1
   0   2   0  75540.  25267.   1
   0   2   0  58870.  12431.   1
   0   2   0  81715.  14656.   1
   0  -2   1  12701. 4289.76   1
   0  -2   1 8662.44 1615.32   1
   0  -2  -1  15239. 5121.09   1
   0  -2  -1 7918.39 1466.51   1
   0   2   1  11047. 3722.45   1
   0   2  -1  14096. 4745.79   1
   0   2  -1  11678. 2140.52   1
   0  -2   2  28038. 5943.70   1
   0  -2  -2  13397. 2598.73   1
   0   2   2  19956. 3755.18   1
   0   2  -2  27820. 5895.70   1
   0  -4   0 331878.  59481.   1
   0  -4   0 305695. 102291.   1
   0  -4   0 315295.  66572.   1
   0  -4   0 260528.  35283.   1
   0   4   0 361117. 120838.   1
   0   4   0 277765.  37595.   1
   0   4   0 261837.  55291.   1
   0   4   0 328387.  58848.   1
   0  -4   1 258564.  86537.   1
   0  -4   1 245254.  43945.   1
   0  -4   1 197665.  41741.   1
   0  -4  -1 267510.  47960.   1
   0  -4  -1 235871.  49793.   1
   0  -4  -1 281257.  94087.   1
   0   4   1 310931. 104058.   1
   0   4   1 264455.  55859.   1
   0   4   1 234999.  42134.   1
   0   4  -1 271219.  90770.   1
   0   4  -1 214226.  38403.   1
   0   4  -1 219943.  46432.   1
   0  -4   2 136832.  24547.   1
   0  -4   2  70020.  23456.   1
   0  -4   2 135130.  28540.   1
   0  -4  -2  87061.  29129.   1
   0  -4  -2 127864.  22933.   1
   0   4   2  90094.  30155.   1
   0   4   2 124482.  22322.   1
   0   4  -2  88981.  29784.   1
   0   4  -2 117216.  21032.   1
   0   4  -2 129762.  27406.   1
   0  -4   3  28278. 5991.70   1
   0  -4  -3  11425. 3877.37   1
   0  -4  -3  22387. 4093.38   1
   0   4   3  12662. 4311.58   1
   0   4   3  16007. 2998.03   1
   0   4  -3  29500. 6244.81   1
   0  -4   4 -837.22 652.629   1
   0  -4  -4 2188.52 1120.66   1
   0   4   4 3233.69 1504.47   1
   0   4  -4  723.32 579.096   1
   0  -6   0 457996.  82108.   1
   0  -6   0 371808. 124394.   1
   0  -6   0 328169.  69300.   1
   0  -6   0 306786.  41545.   1
   0   6   0 364390. 121929.   1
   0   6   0 296749.  40170.   1
   0   6   0 302422.  63866.   1
   0   6   0 473925.  84944.   1
   0  -6   1  59153.  10628.   1
   0  -6   1  44970.  15073.   1
   0  -6   1  38686. 8178.04   1
   0  -6  -1  43901. 7890.02   1
   0  -6  -1  47436.  10028.   1
   0  -6  -1  33035.  11067.   1
   0   6   1  32555.  10914.   1
   0   6   1  42352. 8952.64   1
   0   6   1  47916. 8610.07   1
   0   6  -1  35217.  11813.   1
   0   6  -1  49662.  10495.   1
   0   6  -1  52782. 9489.41   1
   0  -6   2 7427.44 1440.98   1
   0  -6   2 4651.97 1769.80   1
   0  -6   2 4403.22 961.378   1
   0  -6  -2 2738.38 1033.82   1
   0  -6  -2 7028.14 1326.64   1
   0   6   2 3421.34 1271.65   1
   0   6   2 7887.84 1485.71   1
   0   6  -2 3545.71 1424.39   1
   0   6  -2 7261.61 1551.82   1
   0   6  -2 4771.98 1064.37   1
   0  -6   3 7964.21 1593.06   1
   0  -6   3  14661. 5009.81   1
   0  -6   3 7593.27 1641.72   1
   0  -6  -3  22387. 7521.27   1
   0  -6  -3 5897.88 1167.14   1
   0   6   3  22998. 7735.10   1
   0   6   3 8005.67 1541.35   1
   0   6  -3  19799. 6694.30   1
   0   6  -3  11957. 2548.55   1
   0  -6   4  23085. 4374.86   1
   0  -6   4  31115.  10491.   1
   0  -6   4  38075. 8062.40   1
   0  -6  -4  27275. 4968.36   1
   0  -6  -4  32817.  11019.   1
   0   6   4  30657.  10299.   1
   0   6   4  22889. 4235.21   1
   0   6  -4  28213. 9519.96   1
   0   6  -4  36635. 7754.74   1
   0   6  -4  21543. 4368.31   1
   0  -6   5 154746.  32686.   1
   0  -6  -5 116408.  38970.   1
   0  -6  -5 118743.  21344.   1
   0   6   5 131595.  23696.   1
   0   6  -5 167008.  35283.   1
   0  -6   6 3589.35 1039.27   1
   0  -6  -6 6030.98 1865.15   1
   0   6   6 1759.76 2411.08   1
   0   6  -6 4237.39 1135.50   1
   0  -6   7 8778.08 1962.25   1
   0  -6  -7 8647.17 2264.89   1
   0   6   7 2958.76 2306.35   1
   0   6  -7 8433.33 1927.34   1
   0  -8   0 228889.  30984.   1
   0  -8   0 267946.  89636.   1
   0  -8   0 232380.  41676.   1
   0  -8   0 288457.  60921.   1
   0   8   0 352389. 117914.   1
   0   8   0 256818.  34781.   1
   0   8   0 289766.  51931.   1
   0   8   0 230635.  48702.   1
   0  -8   1 7523.45 2609.64   1
   0  -8   1 2152.08 508.836   1
   0  -8   1 4579.96 1009.16   1
   0  -8  -1 2243.07 486.144   1
   0  -8  -1 7124.15 2428.54   1
   0   8   1 3305.69 667.248   1
   0   8   1 5280.38 1216.67   1
   0   8  -1 5745.14 2050.84   1
   0   8  -1 3227.14 746.454   1
   0  -8   2 2389.26 1109.97   1
   0  -8   2  677.28 432.249   1
   0  -8   2 1797.73 454.287   1
   0  -8  -2 2336.89 544.184   1
   0  -8  -2 2555.09 959.196   1
   0  -8  -2 1417.85 476.980   1
   0   8   2 1695.61 598.734   1
   0   8   2 1465.20 708.051   1
   0   8   2  900.94 415.884   1
   0   8  -2  177.13 775.474   1
   0   8  -2  897.23 510.146   1
   0   8  -2 2334.71 575.605   1
   0  -8   3  16710. 3107.13   1
   0  -8   3  13059. 4547.24   1
   0  -8   3  19756. 4187.21   1
   0  -8  -3  18562. 3375.51   1
   0  -8  -3  15514. 5228.01   1
   0   8   3  13808. 4673.79   1
   0   8   3  18857. 3436.61   1
   0   8  -3  17067. 5817.14   1
   0   8  -3  19188. 4065.02   1
   0   8  -3  13131. 2524.54   1
   0  -8   4 8164.95 1678.81   1
   0  -8   4  12487. 4377.04   1
   0  -8   4 9725.06 2094.26   1
   0  -8  -4  10916. 3720.27   1
   0   8   4 9866.89 3390.79   1
   0   8   4  10611. 2015.05   1
   0   8  -4  13777. 4737.07   1
   0   8  -4 8885.00 1911.63   1
   0   8  -4  13173. 2653.28   1
   0  -8   5  11728. 2668.55   1
   0  -8   5  15787. 5500.76   1
   0  -8   5  20943. 4444.68   1
   0  -8  -5  17521. 3253.32   1
   0  -8  -5  16792. 5679.68   1
   0   8   5  17371. 5884.79   1
   0   8   5  13973. 2666.37   1
   0   8  -5  13441. 4719.61   1
   0   8  -5  27013. 5725.50   1
   0  -8   6 3467.16 863.189   1
   0  -8  -6 4863.62 1788.35   1
   0  -8  -6 2998.03 1000.00   1
   0   8   6 4065.02 1568.40   1
   0   8   6  335.37 1120.01   1
   0   8  -6 3307.87 845.515   1
   0  -8   7 5081.82 1205.98   1
   0   8  -7 3822.82 981.670   1
   0  -8   8  -39.84 582.369   1
   0  -8  -8 -256.38 1071.13   1
   0   8   8  987.78 1538.51   1
   0   8  -8  354.13 760.855   1
   0  -8   9 1520.84 721.361   1
   0  -8  -9  138.36 1300.24   1
   0   8   9 -453.20 1754.74   1
   0   8  -9  757.58 810.167   1
   0  -8 -10   73.45 877.590   1
   0   8  10  795.98 1280.16   1
   0 -10   1  41698. 7510.36   1
   0 -10   1  42461.  14253.   1
   0 -10   1  36264. 7674.00   1
   0 -10  -1  44360. 6013.52   1
   0 -10  -1  41959.  14063.   1
   0 -10  -1  42658. 7674.00   1
   0 -10  -1  43269. 9155.57   1
   0  10   1  38534. 8164.95   1
   0  10   1  47196.  15819.   1
   0  10   1  47676. 6463.01   1
   0  10   1  47196. 8487.88   1
   0  10  -1  39297.  13203.   1
   0  10  -1  50164. 9029.01   1
   0  10  -1  40410. 8548.98   1
   0 -10   2 2716.56 697.577   1
   0 -10   2  478.51 949.814   1
   0 -10  -2 4822.16 976.870   1
   0 -10  -2 1756.93 548.767   1
   0 -10  -2 1674.45 773.074   1
   0  10   2 3406.06 1316.17   1
   0  10   2 1670.08 648.919   1
   0  10   2 2509.27 607.680   1
   0  10  -2 3196.59 1428.32   1
   0  10  -2 3698.45 855.989   1
   0  10  -2 1611.39 482.653   1
   0 -10   3 6340.82 2487.45   1
   0 -10   3 4966.17 1149.46   1
   0 -10   3 5540.03 1221.69   1
   0 -10  -3 7185.24 2478.72   1
   0 -10  -3 3024.22 731.834   1
   0 -10  -3 9781.79 2121.32   1
   0  10   3 6417.19 2247.43   1
   0  10   3 4961.81 1012.22   1
   0  10  -3 8647.17 3098.40   1
   0  10  -3 5775.69 1326.20   1
   0  10  -3 6220.81 1373.12   1
   0 -10   4  32686. 5937.15   1
   0 -10   4  26249. 8972.28   1
   0 -10   4  25507. 5404.75   1
   0 -10  -4  23784. 7988.21   1
   0 -10  -4  29457. 5324.02   1
   0  10   4  20526. 6914.68   1
   0  10   4  19398. 3532.62   1
   0  10  -4  20674. 7045.60   1
   0  10  -4  28147. 5965.52   1
   0  10  -4  25115. 4632.33   1
   0 -10   5  31835. 5834.60  -1
   0 -10   5  26882. 9159.93  -1
   0 -10   5  26227. 5559.67  -1
   0 -10  -5  34432.  11549.  -1
   0 -10  -5  30548. 5531.31  -1
   0  10   5  30133.  10120.  -1
   0  10   5  33450. 6059.34  -1
   0  10  -5  29108. 9842.89  -1
   0  10  -5  38708. 8193.31  -1
   0  10  -5  37465. 6925.59  -1
   0 -10   6 9404.31 2544.18   1
   0 -10   6  15688. 5472.39   1
   0 -10   6  12071. 2594.37   1
   0 -10  -6 9212.30 1840.93   1
   0 -10  -6  12354. 4191.57   1
   0  10   6  17275. 5836.78   1
   0  10   6 8361.33 1712.63   1
   0  10  -6  16450. 5670.95   1
   0  10  -6  11215. 2419.81   1
   0  10  -6 7359.80 2976.21   1
   0 -10   7 7392.53 2106.70   1
   0 -10   7 8950.46 3334.06   1
   0 -10   7  10044. 2192.88   1
   0 -10  -7  11602. 2258.34   1
   0 -10  -7  10388. 3545.71   1
   0  10   7 9543.96 3268.60   1
   0  10   7 7922.75 1791.84   1
   0  10  -7 5380.75 2264.89   1
   0  10  -7  15904. 3414.79   1
   0  10  -7 4161.03 2624.92   1
   0 -10   8  340.17 459.742   1
   0 -10  -8 -351.95 564.040   1
   0 -10  -8 -678.59 760.636   1
   0  10   8  717.43 627.754   1
   0  10   8  965.31 1103.42   1
   0  10  -8  884.35 517.128   1
   0 -10   9  624.48 539.820   1
   0 -10  -9 -203.60 761.946   1
   0  10   9 -310.06 1104.08   1
   0  10  -9 -162.30 612.698   1
   0 -10  10 -634.52 561.204   1
   0 -10 -10 -895.92 918.611   1
   0  10  10 -1071.1 1193.32   1
   0  10 -10 -788.13 812.131   1
   0 -10  11 3050.40 898.319   1
   0 -10 -11 1101.90 934.322   1
   0  10  11 -551.82 1172.59   1
   0  10 -11 2142.48 1035.57   1
   0 -10  12  -50.25 544.403   1
   0 -10 -12 1479.38 904.428   1
   0  10  12 1238.93 1125.68   1
   0 -10 -13  154.75 638.664   1
   0 -12   0  13070. 2382.72   1
   0 -12   0  15363. 5193.10   1
   0 -12   0  20993. 4464.32   1
   0  12   0  18383. 6214.26   1
   0  12   0  17421. 3711.54   1
   0  12   0  19079. 3449.70   1
   0 -12   1  23282. 4233.03  -1
   0 -12   1  18811. 2640.19  -1
   0 -12   1  22693. 7667.46  -1
   0 -12   1  20628. 4377.04  -1
   0 -12  -1  24133. 5129.82  -1
   0 -12  -1  20148. 6775.03  -1
   0 -12  -1  21327. 3859.91  -1
   0  12   1  22343. 4765.43  -1
   0  12   1  19236. 6489.19  -1
   0  12   1  22758. 4113.02  -1
   0  12  -1  18728. 6349.55  -1
   0  12  -1  25224. 4573.42  -1
   0  12  -1  21994. 3035.13  -1
   0  12  -1  21698. 4606.15  -1
   0 -12   2 1437.05 1012.44   1
   0 -12   2  824.35 607.898   1
   0 -12   2 1491.16 463.015   1
   0 -12  -2  949.81 414.575   1
   0 -12  -2 1868.42 807.331   1
   0 -12  -2  902.46 456.905   1
   0  12   2  674.88 587.824   1
   0  12   2  469.12 591.752   1
   0  12   2 1186.56 428.758   1
   0  12  -2 1257.25 1017.89   1
   0  12  -2  219.51 378.791   1
   0  12  -2   32.77 497.490   1
   0 -12   3  927.99 1073.97   1
   0 -12   3 2240.89 712.415   1
   0 -12   3 2221.25 549.421   1
   0 -12  -3 1781.15 518.874   1
   0 -12  -3  347.15 502.291   1
   0 -12  -3 1734.67 595.025   1
   0  12   3 2384.90 940.649   1
   0  12   3  419.16 572.768   1
   0  12   3 3122.41 713.069   1
   0  12  -3  -82.30 854.025   1
   0  12  -3  952.87 441.632   1
   0  12  -3 3198.77 820.422   1
   0 -12   4 2171.94 997.381   1
   0 -12   4 -2059.1 1426.57   1
   0 -12   4  792.93 360.680   1
   0 -12  -4  815.19 528.474   1
   0 -12  -4  773.07 489.199   1
   0  12   4  570.80 563.604   1
   0  12   4 2518.00 651.101   1
   0  12  -4 1232.16 1169.54   1
   0  12  -4  455.81 1012.65   1
   0  12  -4  590.66 381.191   1
   0 -12   5 2297.62 1041.67   1
   0 -12   5 8987.55 3375.51   1
   0 -12   5 5553.13 1235.87   1
   0 -12  -5 2834.39 718.306   1
   0 -12  -5 5258.56 1814.53   1
   0  12   5 4128.30 1488.32   1
   0  12   5 3838.09 862.098   1
   0  12  -5 4267.94 1809.08   1
   0  12  -5 3702.81 875.408   1
   0  12  -5 5097.09 1379.66   1
   0 -12   6 1909.88 1227.14   1
   0 -12   6 -289.77 1221.91   1
   0 -12   6  570.15 396.247   1
   0 -12  -6  519.53 518.655   1
   0 -12  -6  576.91 569.932   1
   0  12   6  819.77 596.988   1
   0  12   6 1196.81 641.937   1
   0  12  -6 1600.26 1106.04   1
   0  12  -6 1562.29 519.310   1
   0  12  -6 2871.48 1561.64   1
   0 -12   7  323.81 1212.74  -1
   0 -12   7 1000.22 1136.81  -1
   0 -12   7 2133.10 619.463  -1
   0 -12  -7 2312.89 866.680  -1
   0 -12  -7 1877.15 807.331  -1
   0  12   7 1522.58 742.744  -1
   0  12   7  591.53 821.950  -1
   0  12  -7 2437.27 1217.32  -1
   0  12  -7 2066.11 664.630  -1
   0  12  -7   12.40 1573.86  -1
   0 -12   8  487.02 1002.84   1
   0 -12   8   77.42 892.646   1
   0 -12   8    5.48 500.763   1
   0 -12  -8 1136.81 805.803   1
   0 -12  -8  155.60 544.839   1
   0  12   8   52.85 584.551   1
   0  12   8  560.77 996.071   1
   0  12  -8 1240.89 974.252   1
   0  12  -8  233.47 606.371   1
   0  12  -8  546.15 1271.00   1
   0 -12   9  232.60 514.510   1
   0 -12  -9    7.26 531.311   1
   0 -12  -9 1132.23 830.241   1
   0  12   9  572.33 573.641   1
   0  12   9  463.45 1031.64   1
   0  12  -9 -396.03 558.149   1
   0 -12  10  550.08 605.716  -1
   0 -12 -10  253.33 545.275  -1
   0 -12 -10   78.97 749.072  -1
   0  12  10 1254.85 1041.89  -1
   0  12 -10  617.94 746.017  -1
   0 -12  11  -49.57 588.915   1
   0 -12 -11  307.44 694.523   1
   0  12  11 -614.23 945.231   1
   0  12 -11  336.24 843.988   1
   0 -12  12  543.75 577.351   1
   0 -12 -12 1181.76 753.218   1
   0  12  12  -81.43 905.083   1
   0  12 -12  158.85 770.892   1
   0 -12  13  598.52 611.607   1
   0  12 -13  449.49 761.291   1
   0 -14   0 2592.19 1051.06   1
   0 -14   0 1639.10 538.511   1
   0  14   0 2419.81 1086.19   1
   0  14   0 3098.40 788.347   1
   0 -14   1 3966.83 1536.76   1
   0 -14   1 1427.45 497.927   1
   0 -14   1 1819.55 517.783   1
   0 -14  -1 1248.31 197.709   1
   0 -14  -1 1911.41 797.294   1
   0 -14  -1 1090.33 482.653   1
   0 -14  -1 1034.69 530.438   1
   0  14   1 1650.66 673.139   1
   0  14   1 2456.90 1011.35   1
   0  14   1 1550.07 226.271   1
   0  14   1 1415.88 443.595   1
   0  14  -1 3209.68 1347.15   1
   0  14  -1 1357.41 502.727   1
   0  14  -1 1166.48 432.249   1
   0 -14   2 3161.68 1325.99   1
   0 -14   2 3508.62 871.917   1
   0 -14   2 1980.58 545.057   1
   0 -14  -2 2932.57 709.578   1
   0 -14  -2 2038.62 838.969   1
   0 -14  -2 2360.90 693.868   1
   0  14   2 3200.96 1239.80   1
   0  14   2 1083.13 711.760   1
   0  14   2 3587.17 747.326   1
   0  14  -2 2221.25 1046.69   1
   0  14  -2 2840.93 739.253   1
   0 -14   3  510.15 850.534   1
   0 -14   3  705.87 654.374   1
   0 -14   3 -185.23 305.258   1
   0 -14  -3  794.68 453.414   1
   0 -14  -3 1300.89 664.193   1
   0 -14  -3  538.95 497.927   1
   0  14   3  238.93 773.074   1
   0  14   3 1508.62 820.641   1
   0  14   3  951.78 427.012   1
   0  14  -3  353.48 782.238   1
   0  14  -3  551.60 462.797   1
   0  14  -3  380.32 605.280   1
   0 -14   4 -1872.8 834.169   1
   0 -14   4 -1001.1 913.593   1
   0 -14   4  387.74 333.842   1
   0 -14  -4  624.70 504.691   1
   0 -14  -4 -108.31 420.903   1
   0 -14  -4  693.21 547.239   1
   0  14   4  490.07 571.023   1
   0  14   4  554.88 757.363   1
   0  14   4  411.08 439.886   1
   0  14  -4 -572.99 774.383   1
   0  14  -4  113.51 425.267   1
   0  14  -4  -52.85 740.562   1
   0 -14   5  159.94 773.510   1
   0 -14   5  733.80 1065.68   1
   0 -14   5  871.48 420.248   1
   0 -14  -5  589.35 509.491   1
   0 -14  -5 1104.95 581.496   1
   0  14   5 -282.35 558.804   1
   0  14   5  220.60 507.964   1
   0  14  -5 1758.67  999.56   1
   0  14  -5  424.18 422.648   1
   0  14  -5 -487.67 832.642   1
   0 -14   6 -1029.5 866.680   1
   0 -14   6 -1095.6 1165.39   1
   0 -14   6  822.39 461.051   1
   0 -14  -6  567.10 458.433   1
   0 -14  -6  500.33 577.351   1
   0  14   6  193.04 546.585   1
   0  14   6   88.00 570.368   1
   0  14  -6 -110.34 957.669   1
   0  14  -6 -632.55 882.827   1
   0  14  -6 1515.16 557.713   1
   0 -14   7 -152.26 890.246   1
   0 -14   7   31.64 1013.09   1
   0 -14   7  582.81 437.922   1
   0 -14  -7 1157.10 612.698   1
   0 -14  -7 -464.32 645.646   1
   0  14   7 -399.74 581.060   1
   0  14   7  -58.72 604.189   1
   0  14  -7 -322.50 793.584   1
   0  14  -7 -951.56 1007.85   1
   0  14  -7  335.81 459.960   1
   0 -14   8 -486.36 887.627   1
   0 -14   8  578.44 912.284   1
   0 -14   8 1052.58 539.166   1
   0 -14  -8  486.14 492.908   1
   0 -14  -8  524.33 721.797   1
   0  14   8  412.61 711.542   1
   0  14   8   56.88 571.677   1
   0  14  -8  145.93 874.317   1
   0  14  -8 -261.18 1058.48   1
   0  14  -8 -172.18 562.731   1
   0 -14   9  641.28 805.367   1
   0 -14   9  771.55 809.949   1
   0 -14   9  103.62 540.257   1
   0 -14  -9 -612.26 727.034   1
   0 -14  -9  357.84 426.358   1
   0  14   9 -408.47 542.875   1
   0  14   9 -1585.6 910.102   1
   0  14  -9  137.99 655.902   1
   0  14  -9 -427.89 633.645   1
   0  14  -9   62.12 982.761   1
   0 -14  10 -103.75 584.551   1
   0 -14 -10  447.09 714.597   1
   0 -14 -10  990.62 615.535   1
   0  14  10  -36.98 593.934   1
   0  14  10  948.94 891.991   1
   0  14 -10 -638.23 701.068   1
   0  14 -10  210.50 662.884   1
   0  14 -10  183.02 949.377   1
   0 -14  11  846.17 654.156   1
   0 -14 -11  346.28 613.353   1
   0  14  11  608.33 676.630   1
   0  14 -11 1572.77 713.942   1
   0 -16   0 2125.24 505.127   1
   0 -16   0 2093.17 897.446   1
   0 -16   0 1351.52 563.604   1
   0  16   0 4686.88 1748.85   1
   0  16   0 1012.44 523.019   1
   0  16   0 3550.07 717.433   1
   0 -16   1 1356.75 759.982   1
   0 -16   1 1714.38 566.441   1
   0 -16   1 1389.48 487.235   1
   0 -16   1  582.81 354.134   1
   0 -16  -1  704.34 405.847   1
   0 -16  -1  428.54 571.023   1
   0 -16  -1  609.64 113.354   1
   0 -16  -1 1778.09 784.638   1
   0  16   1 2349.99 1028.15   1
   0  16   1  719.18 129.522   1
   0  16   1  542.22 598.952   1
   0  16   1 1337.77 432.467   1
   0  16  -1 1733.14 896.573   1
   0  16  -1  544.18 408.902   1
   0  16  -1  428.10 432.249   1
   0 -16   2 -159.37 773.292   1
   0 -16   2  349.99 526.074   1
   0 -16   2  637.14 396.465   1
   0 -16  -2  706.52 668.339   1
   0 -16  -2  578.88 520.619   1
   0 -16  -2  696.27 494.654   1
   0 -16  -2  357.41 671.394   1
   0  16   2 1192.45 897.883   1
   0  16   2  827.84 665.066   1
   0  16   2  217.46 172.878   1
   0  16   2 -406.50 386.864   1
   0  16  -2 -612.26 710.887   1
   0  16  -2 -310.93 432.686   1
   0  16  -2 1073.97 548.767   1
   0 -16   3  560.33 779.401   1
   0 -16   3 -157.17 888.500   1
   0 -16   3 -157.04 404.320   1
   0 -16  -3  571.02 507.745   1
   0 -16  -3  595.24 494.217   1
   0 -16  -3  760.20 565.786   1
   0  16   3  442.07 773.292   1
   0  16   3  552.69 578.441   1
   0  16   3  171.57 413.266   1
   0  16  -3 -829.37 778.747   1
   0  16  -3  -91.34 511.455   1
   0  16  -3   30.50 759.545   1
   0 -16   4  473.71 748.854   1
   0 -16   4 -233.69 967.706   1
   0 -16   4  321.40 453.851   1
   0 -16  -4 -372.46 441.413   1
   0 -16  -4 -723.11 593.279   1
   0 -16  -4  -30.74 440.759   1
   0  16   4  474.36 600.698   1
   0  16   4  389.70 879.990   1
   0  16   4  190.42 467.161   1
   0  16  -4 -469.34 846.388   1
   0  16  -4 -158.35 577.132   1
   0  16  -4 -1414.4 765.000   1
   0 -16   5  583.24 853.807   1
   0 -16   5  -69.58 814.749   1
   0 -16   5 2012.65 696.268   1
   0 -16  -5 1417.19 666.593   1
   0 -16  -5 1074.19 570.368   1
   0  16   5 1811.91 863.407   1
   0  16   5 1037.09 558.586   1
   0  16  -5 1284.09 789.657   1
   0  16  -5 2271.44 684.485   1
   0  16  -5 1341.91 868.208   1
   0 -16   6  176.70 826.968  -1
   0 -16   6  116.67 783.983  -1
   0 -16   6  570.37 496.181  -1
   0 -16  -6  436.39 404.756  -1
   0 -16  -6  726.82 581.278  -1
   0  16   6   26.10 549.639  -1
   0  16   6  554.44 557.276  -1
   0  16  -6  807.77 694.086  -1
   0  16  -6 -237.40 462.797  -1
   0  16  -6  702.81 796.639  -1
   0 -16   7   94.33 747.981   1
   0 -16   7 -773.73 810.822   1
   0 -16   7 -206.17 535.020   1
   0 -16  -7  467.60 410.866   1
   0 -16  -7  453.63 644.337   1
   0  16   7  621.43 607.680   1
   0  16   7 -333.84 681.431   1
   0  16  -7  520.84 668.775   1
   0  16  -7  817.37 829.150   1
   0  16  -7  511.02 524.110   1
   0 -16   8 -1350.6 859.480   1
   0 -16   8 -573.86 517.783   1
   0 -16  -8 -482.43 490.508   1
   0  16   8  -30.66 586.297   1
   0  16  -8  187.80 652.192   1
   0  16  -8 -225.83 523.456   1
   0 -16   9  255.73 706.523   1
   0 -16   9 -428.76 536.766   1
   0 -16  -9  822.39 564.259   1
   0  16   9  169.84 606.807   1
   0  16  -9  472.18 650.883   1
   0  16  -9  666.16 558.367   1
   0 -18   0 2659.83 386.210   1
   0 -18   0 5468.03 1944.36   1
   0 -18   0 1034.91 623.827   1
   0  18   0 2895.48 1215.80   1
   0  18   0 2849.66 756.054   1
   0  18   0 3142.04 449.050   1
   0 -18   1  384.46 501.636   1
   0 -18   1 -105.04 190.486   1
   0 -18   1 1114.99 790.529   1
   0 -18   1 2260.53 668.993   1
   0 -18  -1  696.27 632.991   1
   0 -18  -1  294.35  72.289   1
   0 -18  -1  900.06 589.351   1
   0 -18  -1  243.29 484.398   1
   0  18   1  483.31 664.193   1
   0  18   1 1185.03 611.826   1
   0  18   1  192.95  88.806   1
   0  18   1  215.21 430.067   1
   0  18  -1  354.35 726.161   1
   0  18  -1 -317.70 406.720   1
   0  18  -1  244.60 221.034   1
   0  18  -1  912.07 480.689   1
   0 -18   2  -12.94 733.362   1
   0 -18   2  227.80 434.868   1
   0 -18  -2  109.99 166.725   1
   0 -18  -2  176.39 497.272   1
   0 -18  -2 -473.49 660.920   1
   0  18   2  665.94 712.851   1
   0  18   2 -121.45 676.412   1
   0  18   2  209.27 120.925   1
   0  18  -2  -44.73 723.543   1
   0  18  -2 -302.86 305.476   1
   0  18  -2  131.83 442.723   1
   0 -18   3    8.84 689.068   1
   0 -18   3  466.07 436.613   1
   0 -18  -3 -616.84 386.646   1
   0 -18  -3  761.73 515.601   1
   0 -18  -3  627.75 628.409   1
   0  18   3  789.22 678.812   1
   0  18   3 1195.50 794.893   1
   0  18  -3  529.13 651.319   1
   0  18  -3  411.74 507.964   1
   0 -18   4  241.33 704.560   1
   0 -18   4 1040.15 528.692   1
   0 -18  -4  180.56 451.451   1
   0 -18  -4 1074.84 681.431   1
   0  18   4  100.09 553.131   1
   0  18   4 1840.93 879.554   1
   0  18  -4  410.87 669.212   1
   0  18  -4  554.44 574.078   1
   0 -18   5  -34.65 598.734   1
   0 -18   5 1181.10 573.205   1
   0 -18  -5  982.11 571.896   1
   0 -18  -5  610.73 622.954   1
   0  18   5  743.84 659.393   1
   0  18   5 1320.53 874.099   1
   0  18  -5   39.08 535.020   1
   0  18  -5  161.14 523.019   1
  -1  -1   2 128867.  27209.   1
   1   1  -2 129129.  27275.   1
  -1  -1   1 132446.  17901.   1
  -1  -1   1 182173.  38468.   1
   1   1  -1 147196.  19893.   1
   1   1  -1 260746.  87257.   1
   1   1  -1 170369.  35981.   1
   1   1  -1 186581.  33450.   1
   1  -1   0  17035. 3059.13  -1
   1  -1   0  19324. 2616.19  -1
   1  -1   0  16747. 3541.34  -1
  -1  -1   0  18632. 2524.54  -1
   1   1   0  22278. 3015.49  -1
   1   1   0  20319. 4294.13  -1
  -1   1   0  16587. 2247.43  -1
  -1   1   0  21521. 3862.10  -1
   1   1   1 1595.68 683.394   1
   1   1   1  909.01 519.310   1
   1   1   2 -222.34 933.012   1
  -1  -3   4 2995.85 906.174   1
   1   3  -4 1315.73 642.373   1
  -1  -3   3  45341. 9589.78   1
   1   3  -3  43138. 9125.02   1
   1  -3  -2 804712. 144207.   1
   1  -3  -2 692122. 231508.   1
  -1  -3   2 969015. 324241.   1
  -1  -3   2 870608. 156055.   1
  -1  -3   2 627972. 132577.   1
   1   3  -2 898755. 300676.   1
   1   3  -2 657429. 138795.   1
   1   3  -2 870826. 156077.   1
  -1   3   2 733362. 245472.   1
  -1   3   2 999999. 179249.   1
   1  -3  -1  75496.  13544.   1
   1  -3  -1  64979.  21750.   1
  -1  -3   1  70478. 9535.23   1
  -1  -3   1  64477.  21597.   1
  -1  -3   1  90246.  16190.   1
  -1  -3   1  67728.  14305.   1
   1   3  -1  70347.  14859.   1
   1   3  -1  64717.  21676.   1
   1   3  -1  94283.  16915.   1
   1   3  -1  70565. 9541.78   1
  -1   3   1  62688.  20980.   1
  -1   3   1  94938.  17024.   1
   1  -3   0 7988.21 1456.69   1
   1  -3   0  18540. 6216.45   1
   1  -3   0 9458.86 2005.89   1
   1  -3   0 6249.18 852.497   1
  -1  -3   0 7837.65 1670.52   1
  -1  -3   0  22627. 7591.09   1
   1   3   0 6622.29 905.738   1
   1   3   0  12241. 2596.55   1
   1   3   0 4944.35 936.285   1
  -1   3   0  14877. 4992.36   1
  -1   3   0 5084.00 940.213   1
  -1   3   0  10600. 2245.25   1
   1  -3   1  10297. 1884.14   1
   1  -3   1  11676. 3960.28   1
   1  -3   1  15435. 3270.78   1
  -1  -3  -1  13288. 2415.45   1
  -1  -3  -1  10297. 2197.25   1
  -1  -3  -1  16339. 5494.21   1
   1   3   1  13192. 4442.50   1
   1   3   1 9063.92 1939.56   1
   1   3   1  17571. 3179.14   1
  -1   3  -1  12675. 4291.94   1
  -1   3  -1  12069. 2199.43   1
  -1   3  -1 8376.60 1784.64   1
   1  -3   2  81933.  17314.   1
  -1  -3  -2  81322.  27231.   1
  -1  -3  -2  97098.  17421.   1
   1   3   2  74907.  25093.   1
   1   3   2  89134.  16000.   1
  -1   3  -2 120685.  25485.   1
  -1  -3  -3  38905. 7036.87   1
   1   3   3  37966. 6888.49   1
  -1  -3  -4 9286.48 2073.09  -1
   1   3   4 5016.36 1765.22  -1
  -1  -5   7  117.52 677.285   1
   1   5  -7  550.95 605.716   1
  -1  -5   6  19468. 4191.57   1
   1   5  -6  23849. 5108.00   1
   1  -5  -5 2655.46 1298.49   1
  -1   5   5  958.32 1755.84   1
   1  -5  -4  41479. 7538.72   1
  -1  -5   4  43792. 7992.57   1
  -1  -5   4  53786.  11375.   1
  -1  -5   4  32053.  10796.   1
   1   5  -4  44927.  15086.   1
   1   5  -4  60703.  12830.   1
   1   5  -4  35719. 6633.20   1
  -1   5   4  41916. 7693.64   1
   1  -5  -3  33493.  11231.  -1
  -1  -5   3  39712.  13341.  -1
  -1  -5   3  29217. 5310.93  -1
  -1  -5   3  28169. 5965.52  -1
   1   5  -3  42330.  14209.  -1
   1   5  -3  28344. 6000.43  -1
   1   5  -3  19686. 3648.26  -1
  -1   5   3  32424.  10879.  -1
  -1   5   3  26249. 4798.16  -1
   1  -5  -2  23914. 8020.94   1
   1  -5  -2  18058. 3279.51   1
  -1  -5   2  38119.  12806.   1
  -1  -5   2  12474. 2312.89   1
  -1   5   2  28235. 9471.95   1
  -1   5   2  14621. 2672.92   1
   1  -5  -1 113506.  37988.   1
   1  -5  -1 133122.  23871.   1
   1  -5  -1 127842.  26991.   1
  -1  -5   1 127711.  17264.   1
  -1  -5   1  97098.  32511.   1
  -1  -5   1 149291.  26773.   1
  -1  -5   1 136286.  28780.   1
   1   5  -1 115056.  24307.   1
   1   5  -1 145647.  48745.   1
   1   5  -1 126424.  17087.   1
   1   5  -1 149989.  26904.   1
  -1   5   1 151778.  50796.   1
  -1   5   1 135522.  28628.   1
  -1   5   1 108531.  19468.   1
   1  -5   0  13343. 4488.32   1
   1  -5   0  17537. 3170.41   1
   1  -5   0  13823. 2934.76   1
  -1  -5   0  14835. 2014.18   1
  -1  -5   0  17722. 5958.97   1
  -1  -5   0  10796. 2301.98   1
   1   5   0  14744. 2000.87   1
   1   5   0  13578. 2882.39   1
   1   5   0  10864. 3685.36   1
   1   5   0  11580. 2114.99   1
  -1   5   0  12566. 4237.39   1
  -1   5   0  14569. 3087.49   1
  -1   5   0  12852. 2334.71   1
   1  -5   1 5214.92 991.053  -1
   1  -5   1 8047.12 2742.74  -1
   1  -5   1 3582.80 793.584  -1
  -1  -5  -1  10131. 3432.25  -1
  -1  -5  -1 5897.88 1112.37  -1
  -1  -5  -1 2463.45 590.006  -1
   1   5   1  15470. 5228.01  -1
   1   5   1 3864.28 757.145  -1
  -1   5  -1 9766.52 3318.78  -1
  -1   5  -1 4370.50 864.280  -1
  -1   5  -1 3696.27 811.258  -1
   1  -5   2  19426. 3545.71   1
   1  -5   2  23129. 7800.56   1
   1  -5   2  17833. 3783.54   1
  -1  -5  -2  18276. 6144.44   1
  -1  -5  -2  22976. 4161.03   1
   1   5   2  21530. 7239.79   1
   1   5   2  16936. 3078.77   1
  -1   5  -2  19321. 4093.38   1
  -1   5  -2  16437. 3043.85   1
   1  -5   3  34650. 6338.64   1
   1  -5   3  49640.  16648.   1
   1  -5   3  48440.  10244.   1
  -1  -5  -3  44098. 7944.57   1
  -1  -5  -3  65787.  22038.   1
   1   5   3  51058.  17107.   1
   1   5   3  44447. 8007.85   1
  -1   5  -3  47436.  10031.   1
   1  -5   4  16823. 3626.44  -1
  -1  -5  -4  23042. 7752.56  -1
  -1  -5  -4  14261. 2675.10  -1
   1   5   4  29697. 9978.17  -1
   1   5   4  15621. 2947.85  -1
  -1   5  -4  22125. 4717.43  -1
  -1  -5  -7 -783.11 1595.24   1
   1   5   7 -1129.8 2069.17   1
  -1  -7   9  943.70 668.557  -1
   1   7  -9  280.17 724.416  -1
   1  -7  -8  143.53 1039.06  -1
  -1  -7   8 1015.93 663.102  -1
   1   7  -8  356.53 737.944  -1
   1  -7  -7 1326.20 1432.25   1
  -1  -7   7 1968.36 657.429   1
   1   7  -7 1920.57 688.413   1
  -1   7   7 1665.50 2068.51   1
   1  -7  -6  15468. 3113.68   1
  -1  -7   6  15021. 3220.59   1
   1   7  -6  17427. 3724.63   1
  -1   7   6 9487.23 2771.11   1
   1  -7  -5 2369.62 955.050   1
   1  -7  -5 4926.90 1818.24   1
  -1  -7   5 2424.17 1508.40   1
  -1  -7   5 4065.02 958.978   1
  -1  -7   5 -931.70 1263.15   1
   1   7  -5 3822.82 1785.51   1
   1   7  -5 4429.41 1015.93   1
   1   7  -5 4440.32 2181.97   1
  -1   7   5 5937.15 2149.90   1
  -1   7   5 1457.56 1205.32   1
   1  -7  -4 9605.05 3290.42   1
  -1  -7   4  12466. 4361.77   1
  -1  -7   4  19932. 3702.81   1
   1   7  -4  11207. 3910.10   1
   1   7  -4  15324. 2995.85   1
  -1   7   4  11704. 4003.92   1
  -1   7   4  13035. 2500.54   1
   1  -7  -3  72180.  12961.   1
   1  -7  -3  82675.  27689.   1
  -1  -7   3  76325.  16123.   1
  -1  -7   3  67488.  12138.   1
  -1  -7   3  97120.  32555.   1
   1   7  -3  65699.  22038.   1
   1   7  -3  71656.  15141.   1
   1   7  -3  83373.  14997.   1
  -1   7   3 112066.  37508.   1
  -1   7   3  73947.  13284.   1
   1  -7  -2  26227. 8795.54   1
   1  -7  -2  38359. 6897.22   1
  -1  -7   2  25049. 8448.61   1
  -1  -7   2  35653. 6430.28   1
   1   7  -2  26184. 8826.09   1
   1   7  -2  25922. 4699.97   1
  -1   7   2  27275. 9153.38   1
  -1   7   2  24264. 4379.22   1
   1  -7  -1  16747. 3030.76   1
   1  -7  -1  18235. 6120.44   1
   1  -7  -1 9539.59 2043.42   1
  -1  -7   1  10559. 1465.85   1
  -1  -7   1  11730. 2498.36   1
  -1  -7   1  20628. 6947.41   1
   1   7  -1  21516. 7246.34   1
   1   7  -1  12357. 1698.45   1
   1   7  -1 8924.28 1910.76   1
   1   7  -1  15710. 2864.93   1
  -1   7   1  17277. 5808.42   1
  -1   7   1  12328. 2245.25   1
  -1   7   1 8967.92 1925.16   1
   1  -7   0 7813.65 2655.46   1
   1  -7   0 1876.06 428.540   1
   1  -7   0 1436.18 416.103   1
  -1  -7   0 9229.75 3135.50   1
  -1  -7   0  673.14 153.327   1
  -1  -7   0 1213.61 410.866   1
  -1  -7   0 2504.91 540.257   1
   1   7   0 5199.65 1833.73   1
   1   7   0  739.03 151.276   1
   1   7   0 1885.01 466.943   1
  -1   7   0 6002.61 2082.91   1
  -1   7   0 2655.46 613.135   1
  -1   7   0 1525.85 387.082   1
   1  -7   1 3037.31 653.720   1
   1  -7   1 3626.44 1331.66   1
   1  -7   1 2148.37 517.128   1
  -1  -7  -1 2886.75 454.069   1
  -1  -7  -1 2387.08 522.365   1
  -1  -7  -1 3670.08 1294.35   1
   1   7   1 3593.71 518.874   1
   1   7   1 1674.88 519.092   1
   1   7   1 2579.09 982.543   1
  -1   7  -1 3737.72 1390.79   1
  -1   7  -1 2232.16 536.984   1
  -1   7  -1 3283.87 689.286   1
   1  -7   2  25224. 4571.24   1
   1  -7   2  18045. 6120.44   1
   1  -7   2  31988. 6761.94   1
  -1  -7  -2  28824. 5199.65   1
  -1  -7  -2  27951. 5926.24   1
  -1  -7  -2  17840. 6000.43   1
   1   7   2  21746. 7311.80   1
   1   7   2  25224. 5365.48   1
   1   7   2  33253. 5991.70   1
  -1   7  -2  16535. 5607.67   1
  -1   7  -2  24940. 5276.01   1
  -1   7  -2  24525. 4464.32   1
   1  -7   3  20635. 3785.73   1
   1  -7   3  21108. 7187.42   1
   1  -7   3  24482. 5186.55   1
  -1  -7  -3  27711. 9303.94   1
  -1  -7  -3  17606. 3209.68   1
   1   7   3  16210. 5472.39   1
   1   7   3  14853. 2723.10   1
  -1   7  -3  19821. 4202.48   1
  -1   7  -3  13644. 2629.28   1
   1  -7   4 4374.86 1567.53   1
   1  -7   4 5830.24 2210.34   1
   1  -7   4 5328.38 1202.05   1
  -1  -7  -4 5974.25 2123.28   1
  -1  -7  -4 7329.25 1448.39   1
   1   7   4 6596.11 2345.62   1
   1   7   4 7497.27 1494.43   1
  -1   7  -4 9495.95 3349.33   1
  -1   7  -4 5247.65 1170.63   1
   1  -7   5 8010.03 1790.53   1
  -1  -7  -5 8092.94 2832.20   1
  -1  -7  -5 7025.96 1511.89   1
   1   7   5 6349.55 2315.08   1
   1   7   5 6847.04 1502.51   1
  -1   7  -5 7676.19 1682.74   1
   1  -7   6 6755.39 1557.06  -1
  -1  -7  -6 5847.69 2125.24  -1
  -1  -7  -6 5633.86 1408.46  -1
   1   7   6 4774.16 1802.09  -1
   1   7   6 2343.44 1362.86  -1
  -1   7  -6 3853.37 1067.86  -1
   1  -7   7 1127.64 634.955   1
  -1  -7  -7 1210.34 1023.78   1
   1   7   7 -341.70 1631.24   1
  -1   7  -7 1221.69 701.068   1
  -1  -7  -8  449.27 1135.50   1
   1   7   8  947.41 1838.53   1
  -1  -7  -9  652.85 1188.96   1
   1   7   9 -1835.9 1889.59   1
  -1  -7 -10  -16.81 1051.28   1
  -1  -9  12 -375.95 599.170   1
  -1  -9  11  380.54 593.715   1
   1   9 -11  227.58 919.921   1
   1  -9 -10 1013.31 808.422   1
  -1  -9  10 1337.99 692.559   1
   1   9 -10 1589.13 925.594   1
  -1   9  10  541.78 1075.28   1
   1  -9  -9 3406.06 1314.64   1
  -1  -9   9 2675.10 795.112   1
   1   9  -9 2312.89 812.786   1
  -1   9   9 1002.62 1597.21   1
   1  -9  -8 6183.72 1608.77   1
  -1  -9   8 7796.20 1739.25   1
   1   9  -8 4182.85 1051.49   1
  -1   9   8 2156.01 1856.64   1
   1  -9  -7 4835.26 1290.86   1
   1  -9  -7 5027.27 1812.78   1
  -1  -9   7 5590.22 1272.53   1
   1   9  -7 3593.71 1744.27   1
   1   9  -7 7689.28 1711.54   1
   1   9  -7 2387.08 2806.02   1
  -1   9   7 2321.62 1336.24   1
   1  -9  -6  14842. 2819.11   1
   1  -9  -6  15887. 5376.39   1
  -1  -9   6  11438. 2456.90   1
  -1  -9   6  12086. 4366.13   1
   1   9  -6  14093. 4955.26   1
   1   9  -6  11039. 2380.53   1
   1   9  -6  20336. 4510.14   1
  -1   9   6  14488. 4918.17   1
   1  -9  -5 2129.83 885.882  -1
   1  -9  -5 1029.24 662.229  -1
  -1  -9   5 1279.95 1474.58  -1
  -1  -9   5 -628.19 862.316  -1
   1   9  -5 1625.79 1272.75  -1
   1   9  -5  334.93 1209.47  -1
  -1   9   5   21.29 552.912  -1
  -1   9   5 1521.93 762.164  -1
   1  -9  -4 1161.68 548.330   1
   1  -9  -4 1709.80 822.823   1
  -1  -9   4 1358.50 393.192   1
  -1  -9   4 -377.70 1510.36   1
  -1  -9   4 1862.10 802.748   1
   1   9  -4 1310.93 423.521   1
   1   9  -4 3107.13 1576.91   1
   1   9  -4 2087.28 952.432   1
  -1   9   4  928.65 713.287   1
  -1   9   4 1034.47 564.477   1
   1  -9  -3  15276. 5153.82   1
   1  -9  -3  20281. 3687.54   1
  -1  -9   3  14715. 5108.00   1
  -1  -9   3  22802. 4187.21   1
  -1  -9   3  18324. 3886.10   1
   1   9  -3  22125. 4097.75   1
   1   9  -3  22147. 7508.17   1
   1   9  -3  18475. 3921.01   1
  -1   9   3  22605. 7604.18   1
  -1   9   3  25027. 4531.96   1
   1  -9  -2  79511.  26620.   1
   1  -9  -2  50775.  10735.   1
  -1  -9   2  44010. 9306.12   1
  -1  -9   2  82195.  27537.   1
  -1  -9   2  74842.  13452.   1
   1   9  -2  59699.  12623.   1
   1   9  -2  67598.  22649.   1
   1   9  -2  72594.  13050.   1
  -1   9   2  77395.  25922.   1
  -1   9   2  52847.  11183.   1
  -1   9   2  78027.  14015.   1
   1  -9  -1  12841. 4329.04   1
   1  -9  -1  10375. 1903.12   1
  -1  -9   1  11180. 1545.06   1
  -1  -9   1  11108. 3814.09   1
  -1  -9   1 9561.41 1788.56   1
  -1  -9   1 9279.94 1994.11   1
   1   9  -1 9609.42 1331.22   1
   1   9  -1 9255.94 1991.71   1
   1   9  -1  19297. 6535.01   1
   1   9  -1  13135. 2428.54   1
  -1   9   1  14176. 4787.25   1
  -1   9   1  10044. 2190.70   1
  -1   9   1 9978.17 1831.99   1
   1  -9   0 1101.46 674.885   1
   1  -9   0  666.59 273.401   1
   1  -9   0 1098.41 408.247   1
  -1  -9   0  621.86 146.869   1
  -1  -9   0 2249.62 976.652   1
  -1  -9   0  555.75 292.166   1
  -1  -9   0 1644.55 502.291   1
   1   9   0 1746.89 480.907   1
   1   9   0 1775.04 938.904   1
   1   9   0  663.54 143.007   1
  -1   9   0 1801.22 903.774   1
  -1   9   0  631.90 217.259   1
  -1   9   0 1434.65 424.394   1
   1  -9   1 1522.80 439.450   1
   1  -9   1  536.55 674.448   1
   1  -9   1 1329.91 414.575   1
  -1  -9  -1 1477.63 663.539   1
  -1  -9  -1 2008.07 311.150   1
  -1  -9  -1 2020.51 492.690   1
  -1  -9  -1 1891.99 572.332   1
   1   9   1 1507.31 737.289   1
   1   9   1 1059.79 483.307   1
   1   9   1 2328.17 341.915   1
   1   9   1 2631.46 587.606   1
  -1   9  -1 1824.57 962.687   1
  -1   9  -1 1527.16 463.670   1
  -1   9  -1 2707.83 637.137   1
   1  -9   2  49356.  16559.   1
   1  -9   2  45276. 8154.04   1
   1  -9   2  34192. 7231.06   1
  -1  -9  -2  40868. 7361.98   1
  -1  -9  -2  50622.  16956.   1
  -1  -9  -2  48854.  10334.   1
   1   9   2  41283. 8745.35   1
   1   9   2  47196.  15817.   1
   1   9   2  43683. 7868.20   1
  -1   9  -2  43334.  14541.   1
  -1   9  -2  48920. 8810.81   1
  -1   9  -2  44469. 9402.13   1
   1  -9   3  47327. 8542.43   1
   1  -9   3  66594.  22365.   1
   1  -9   3  41327. 8736.63   1
  -1  -9  -3  51080.  17120.   1
  -1  -9  -3  38708. 6980.14   1
   1   9   3  50818.  17030.   1
   1   9   3  43639. 7861.65   1
  -1   9  -3  50447.  16947.   1
  -1   9  -3  37966. 8027.48   1
   1  -9   4  22322. 4121.75  -1
   1  -9   4  30919.  10467.  -1
   1  -9   4  14901. 3174.77  -1
  -1  -9  -4  32381.  10866.  -1
   1   9   4  23631. 7962.03  -1
   1   9   4  18254. 3342.79  -1
  -1   9  -4  32162.  10849.  -1
  -1   9  -4  23391. 4401.04  -1
  -1   9  -4  11713. 2504.91  -1
   1  -9   5  19808. 3931.92   1
   1  -9   5  37814.  12782.   1
   1  -9   5  27755. 5882.60   1
  -1  -9  -5  26686. 4854.89   1
  -1  -9  -5  31050.  10419.   1
   1   9   5  31159.  10463.   1
   1   9   5  24591. 4483.96   1
  -1   9  -5  39210.  13218.   1
  -1   9  -5  26816. 5686.23   1
  -1   9  -5  32708. 6417.19   1
   1  -9   6 2982.76 1717.00  -1
   1  -9   6 3796.64 925.375  -1
  -1  -9  -6 3397.33 1307.00  -1
  -1  -9  -6 4291.94 1049.75  -1
   1   9   6 4147.93 1564.69  -1
   1   9   6 3043.85 949.595  -1
  -1   9  -6 9430.49 3447.52  -1
  -1   9  -6 3432.25 878.463  -1
  -1   9  -6 3214.05 2847.48  -1
   1  -9   7  606.15 483.526   1
  -1  -9  -7  640.19 720.270   1
   1   9   7  377.92 737.289   1
  -1   9  -7  813.22 527.820   1
   1  -9   8 3222.78 934.103   1
  -1   9  -8 3279.51 1091.86   1
   1  -9   9  668.56 617.717   1
  -1  -9  -9  850.97 843.770   1
   1   9   9 -2507.1 1333.62   1
  -1   9  -9 1010.47 762.164   1
  -1  -9 -10 1286.06 842.460   1
   1   9  10 -1678.6 1173.68   1
  -1  -9 -11  943.92 945.231  -1
   1   9  11  147.94 1227.14  -1
  -1  -9 -12 -521.49 834.823   1
   1   9  12    3.55 1101.46   1
  -1 -11  13 -213.35 544.621   1
   1  11 -13  636.48 831.114   1
   1 -11 -12  874.10 824.350  -1
  -1 -11  12  721.14 572.768  -1
   1  11 -12 1002.40 866.898  -1
  -1  11  12  224.31 958.105  -1
   1 -11 -11  229.11 850.097   1
  -1 -11  11 1488.11 698.014   1
   1  11 -11 1340.82 953.086   1
  -1  11  11 1236.53 1032.51   1
   1 -11 -10  -48.16 887.845   1
  -1 -11  10 -345.41 513.637   1
   1  11 -10  268.82 612.917   1
  -1  11  10 -732.05 1120.66   1
   1 -11  -9 1847.04 920.793   1
  -1 -11   9 1075.28 601.789   1
   1  11  -9 1227.14 663.975   1
  -1  11   9 1427.23 1168.67   1
   1 -11  -8 -364.17 777.219   1
   1 -11  -8  144.29 519.528   1
  -1 -11   8  711.54 1171.50   1
  -1 -11   8  307.22 498.799   1
  -1 -11   8  -99.67 1262.05   1
   1  11  -8 2258.34 1359.15   1
   1  11  -8  430.07 562.077   1
   1  11  -8  648.26 1535.46   1
  -1  11   8  865.37 620.772   1
  -1  11   8 -1737.3 1056.08   1
   1 -11  -7  650.66 676.194   1
   1 -11  -7  646.30 579.751   1
  -1 -11   7 1258.56 1434.65   1
  -1 -11   7 1013.75 1494.65   1
  -1 -11   7 1034.47 472.179   1
   1  11  -7 1193.10 1258.34   1
   1  11  -7  156.91 469.997   1
   1  11  -7 1182.63 1844.20   1
  -1  11   7  443.38 583.678   1
  -1  11   7 1993.89 875.626   1
   1 -11  -6 2079.20 893.737   1
   1 -11  -6 1412.39 653.720   1
  -1 -11   6 4575.60 2229.98   1
  -1 -11   6 3244.60 1135.50   1
   1  11  -6 3320.97 1710.45   1
   1  11  -6 4137.02 1564.48   1
  -1  11   6 2869.30 1145.10   1
  -1  11   6 1456.25 704.123   1
   1 -11  -5 3567.53 842.242   1
   1 -11  -5 3015.49 1136.15   1
  -1 -11   5 3862.10 2046.91   1
  -1 -11   5 3698.45 854.461   1
  -1 -11   5 2485.27 904.210   1
   1  11  -5 2380.53 1463.01   1
   1  11  -5 2439.45 635.391   1
   1  11  -5 1718.09 1012.44   1
  -1  11   5 1831.33 876.063   1
  -1  11   5 2598.73 719.615   1
   1 -11  -4 3111.50 1152.30  -1
  -1 -11   4 2027.05 1414.57  -1
  -1 -11   4 2644.55 891.337  -1
  -1 -11   4 2618.37 624.918  -1
   1  11  -4 2760.20 1455.60  -1
   1  11  -4 3921.01 905.956  -1
   1  11  -4  866.24 941.740  -1
  -1  11   4 4089.02 1492.47  -1
  -1  11   4 2188.52 579.314  -1
   1 -11  -3  14442. 2638.01   1
   1 -11  -3  14244. 4809.07   1
   1 -11  -3  14078. 3015.49   1
  -1 -11   3  11881. 4176.30   1
  -1 -11   3  12767. 2384.90   1
  -1 -11   3  10497. 2245.25   1
   1  11  -3  11525. 4025.74   1
   1  11  -3 7962.03 1746.02   1
   1  11  -3  13764. 2574.73   1
  -1  11   3  14543. 4920.35   1
  -1  11   3  18436. 3344.97   1
   1 -11  -2  12350. 2264.89   1
   1 -11  -2  20133. 6775.03   1
   1 -11  -2  14899. 3185.68   1
  -1 -11   2  17894. 3283.87   1
  -1 -11   2  15769. 5393.84   1
  -1 -11   2  10622. 2280.16   1
   1  11  -2  13637. 2921.66   1
   1  11  -2  18121. 6177.17   1
   1  11  -2  15143. 2158.85   1
   1  11  -2  14045. 2598.73   1
  -1  11   2  21807. 7348.89   1
  -1  11   2  15368. 3314.42   1
  -1  11   2  15586. 2838.75   1
   1 -11  -1 9293.03 1715.47   1
   1 -11  -1 8743.17 1348.02   1
   1 -11  -1  14139. 4774.16   1
   1 -11  -1 8559.89 1859.04   1
  -1 -11   1  13203. 4516.69   1
  -1 -11   1 8479.15 1186.99   1
  -1 -11   1 8167.13 1544.62   1
  -1 -11   1 8228.23 1782.46   1
   1  11  -1  10301. 2216.89   1
   1  11  -1  11807. 4054.11   1
   1  11  -1 7802.74 1092.95   1
   1  11  -1 8391.87 1592.41   1
  -1  11   1 9149.02 3142.04   1
  -1  11   1 8653.71 1894.39   1
  -1  11   1 7848.56 1457.12   1
   1 -11   0 2006.98 459.306   1
   1 -11   0  12093. 4097.75   1
   1 -11   0 2439.45 620.990   1
  -1 -11   0 1522.36 393.846   1
  -1 -11   0 1093.82 205.891   1
  -1 -11   0  11722. 3982.10   1
  -1 -11   0 2670.74 677.940   1
   1  11   0  10796. 3702.81   1
   1  11   0 4459.96 1012.22   1
   1  11   0 2038.62 487.890   1
  -1  11   0  10135. 3469.34   1
  -1  11   0 3598.08 825.877   1
  -1  11   0 2203.79 501.854   1
  -1  11   0 1556.62 256.164   1
   1 -11   1 1318.13 436.831   1
   1 -11   1 1830.02 910.320   1
   1 -11   1  971.42 379.445   1
  -1 -11  -1  828.28 344.970   1
  -1 -11  -1 1653.50 252.891   1
  -1 -11  -1 3028.58 1154.05   1
  -1 -11  -1  822.39 446.868   1
   1  11   1 1420.25 220.598   1
   1  11   1 1959.63 633.209   1
   1  11   1 1121.97 389.046   1
   1  11   1 1483.09 842.024   1
  -1  11  -1 1490.07 943.049   1
  -1  11  -1  777.44 375.300   1
  -1  11  -1  866.68 425.703   1
   1 -11   2 6096.44 2291.07   1
   1 -11   2 7717.64 1492.69   1
   1 -11   2 7309.62 1579.10   1
  -1 -11  -2 8898.09 1660.70   1
  -1 -11  -2 3755.18 1363.52   1
  -1 -11  -2 8038.39 1765.65   1
   1  11   2 7331.44 1673.79   1
   1  11   2 4497.05 1677.07   1
   1  11   2 6244.81 1209.25   1
  -1  11  -2 3838.09 1625.35   1
  -1  11  -2 6371.37 1400.61   1
  -1  11  -2 7580.18 1476.54   1
   1 -11   3  13011. 4529.78  -1
   1 -11   3 8819.54 1776.78  -1
   1 -11   3 9692.33 2078.55  -1
  -1 -11  -3  18453. 6216.45  -1
  -1 -11  -3 9308.30 1736.63  -1
  -1 -11  -3  14582. 3128.95  -1
   1  11   3  12223. 4150.12  -1
   1  11   3  10388. 1927.12  -1
  -1  11  -3  13766. 4737.07  -1
  -1  11  -3  15675. 3340.60  -1
  -1  11  -3 7340.16 1543.53  -1
   1 -11   4  13659. 2609.64   1
   1 -11   4 6305.91 2465.63   1
   1 -11   4  10775. 2301.98   1
  -1 -11  -4 7442.72 2563.82   1
  -1 -11  -4  12998. 2395.81   1
   1  11   4  11167. 3803.18   1
   1  11   4  13009. 2402.35   1
  -1  11  -4 8756.26 3157.32   1
  -1  11  -4  12618. 2694.74   1
   1 -11   5 3606.80 1127.64   1
   1 -11   5 7495.08 2910.75   1
   1 -11   5 3515.16 830.678   1
  -1 -11  -5 5415.66 1883.92   1
  -1 -11  -5 3475.89 815.840   1
   1  11   5 5450.57 1923.85   1
   1  11   5 2858.39 728.343   1
  -1  11  -5 8114.76 3015.49   1
  -1  11  -5 3196.59 1351.30   1
  -1  11  -5 3766.09 896.355   1
   1 -11   6  149.90 1461.70   1
   1 -11   6 1156.23 1320.97   1
   1 -11   6  253.55 401.047   1
  -1 -11  -6   93.15 543.094   1
  -1 -11  -6  776.78 540.475   1
   1  11   6 1285.62 616.190   1
   1  11   6 1357.41 741.435   1
  -1  11  -6 -1824.6 1390.79   1
  -1  11  -6 1163.21 1884.79   1
  -1  11  -6 1221.03 530.656   1
   1 -11   7 2498.36 1372.68   1
   1 -11   7  736.20 1145.32   1
   1 -11   7 -310.49 422.430   1
  -1 -11  -7  668.34 706.087   1
  -1 -11  -7  980.80 619.463   1
   1  11   7 -107.81 543.094   1
   1  11   7    8.51 746.672   1
  -1  11  -7 -641.06 1182.85   1
  -1  11  -7  329.91 469.997   1
  -1  11  -7 3757.36 2103.86   1
   1 -11   8  376.17 469.125   1
  -1 -11  -8 -603.32 572.550   1
  -1 -11  -8 -1228.0 749.727   1
   1  11   8   33.14 547.457   1
   1  11   8  262.71 947.195   1
  -1  11  -8  286.28 504.254   1
   1 -11   9  -93.13 556.622   1
  -1 -11  -9 -389.92 823.477   1
  -1 -11  -9 1959.41 850.097   1
   1  11   9 -625.79 1231.72   1
   1  11   9    8.94 522.365   1
  -1  11  -9 -507.75 631.027   1
   1 -11  10 1244.16 648.046   1
  -1 -11 -10 1275.58 838.096   1
   1  11  10 -851.41 1257.91   1
  -1  11 -10  574.95 845.733   1
   1 -11  11 1398.86 692.341   1
  -1 -11 -11  987.56 835.042   1
   1  11  11 1863.19 1174.56   1
  -1  11 -11  862.75 904.428   1
   1 -11  12  284.75 504.691   1
  -1 -11 -12 -743.84 789.220   1
   1  11  12 -519.75 1042.33   1
  -1  11 -12 -716.12 830.460   1
  -1 -13  12  291.73 624.699   1
   1  13 -12 1148.81 739.035   1
   1 -13 -11 1178.48 729.652   1
  -1 -13  11  532.40 603.752   1
   1  13 -11 -317.91 746.672   1
  -1  13  11 -679.47 914.466   1
   1 -13 -10  530.22 696.486   1
   1 -13 -10   25.51 428.540   1
  -1 -13  10  609.86 544.403   1
   1  13 -10  220.82 703.250   1
   1  13 -10   49.40 703.469   1
   1  13 -10 -268.82 844.424   1
  -1  13  10  157.60 583.242   1
  -1  13  10 -536.11 955.487   1
   1 -13  -9  -19.57 516.255   1
   1 -13  -9 -104.32 734.671   1
  -1 -13   9  430.50 1039.49   1
  -1 -13   9  133.73 946.322   1
  -1 -13   9  576.04 531.311   1
   1  13  -9  565.79 1000.44   1
   1  13  -9 1490.51 1079.20   1
   1  13  -9  511.45 662.448   1
  -1  13   9 1137.68 729.434   1
  -1  13   9 -480.25 943.049   1
   1 -13  -8 2299.80 912.065   1
   1 -13  -8  277.77 503.600   1
  -1 -13   8  513.86 461.051   1
  -1 -13   8  130.15 1039.71   1
  -1 -13   8  179.90 1037.97   1
   1  13  -8   35.50 895.919   1
   1  13  -8 1286.06 620.117   1
   1  13  -8  829.15 1106.26   1
  -1  13   8  429.85 608.771   1
  -1  13   8  920.58 887.627   1
   1 -13  -7  700.41 526.510   1
   1 -13  -7  343.01 757.800   1
  -1 -13   7 -294.57 991.271   1
  -1 -13   7 -701.07 816.059   1
   1  13  -7 -238.71 770.455   1
   1  13  -7 -1627.8 1058.04   1
  -1  13   7  717.43 610.953   1
  -1  13   7  832.21 845.297   1
   1 -13  -6 1054.98 593.061   1
   1 -13  -6  729.22 608.771   1
  -1 -13   6  713.94 1128.74   1
  -1 -13   6 -459.31 825.441   1
  -1 -13   6   -0.99 372.681   1
   1  13  -6 -201.88 961.378   1
   1  13  -6  634.95 468.252   1
   1  13  -6 -397.77 929.085   1
  -1  13   6  241.76 542.657   1
  -1  13   6   -7.56 584.987   1
   1 -13  -5 -299.59 479.162   1
   1 -13  -5  142.48 416.103   1
  -1 -13   5  120.86 1133.97   1
  -1 -13   5 1063.49 427.667   1
  -1 -13   5   62.93 819.113   1
   1  13  -5  -89.50 926.466   1
   1  13  -5   37.70 395.810   1
   1  13  -5 -361.34 759.982   1
  -1  13   5  950.69 614.008   1
  -1  13   5  518.44 474.579   1
   1 -13  -4  404.10 493.126   1
   1 -13  -4 1264.89 610.080   1
  -1 -13   4  153.39 325.769   1
  -1 -13   4  583.46 712.197   1
  -1 -13   4  868.86 1069.17   1
   1  13  -4 2891.12 1362.86   1
   1  13  -4  417.41 423.958   1
   1  13  -4  165.87 665.720   1
  -1  13   4 1829.80 807.112   1
  -1  13   4  760.42 459.524   1
   1 -13  -3 8228.23 2808.20   1
   1 -13  -3 3960.28 857.734   1
  -1 -13   3 2768.93 671.394   1
  -1 -13   3 4425.04 1027.93   1
   1  13  -3 6024.43 2232.16   1
   1  13  -3 5500.76 1160.81   1
   1  13  -3 5003.27 1166.05   1
  -1  13   3 5734.23 2019.20   1
  -1  13   3 6153.17 1217.54   1
  -1  13   3 1830.02 909.665   1
   1 -13  -2 4080.29 1469.12  -1
   1 -13  -2 2144.23 600.698  -1
   1 -13  -2 4041.02 970.324  -1
  -1 -13   2 2118.26 627.099  -1
  -1 -13   2 1900.72 1020.07  -1
  -1 -13   2 4309.40 974.688  -1
  -1 -13   2 2489.63 637.355  -1
   1  13  -2 3183.50 794.893  -1
   1  13  -2 4381.41 1690.59  -1
   1  13  -2  309.19 550.076  -1
  -1  13   2 4305.04 1572.11  -1
  -1  13   2 2044.51 761.291  -1
  -1  13   2 4065.02 840.278  -1
   1 -13  -1 6526.29 1257.69  -1
   1 -13  -1 6521.92 899.192  -1
   1 -13  -1 5262.92 1841.59  -1
   1 -13  -1 5084.00 1181.10  -1
  -1 -13   1 6332.09 910.974  -1
  -1 -13   1 4985.81 1127.64  -1
  -1 -13   1 2795.11 1179.79  -1
  -1 -13   1 5507.30 1123.72  -1
   1  13  -1 5173.46 1902.25  -1
   1  13  -1 6109.53 867.553  -1
   1  13  -1 8304.60 1577.57  -1
   1  13  -1 4235.21 994.544  -1
  -1  13   1 6314.63 2221.25  -1
  -1  13   1 4841.80 1177.83  -1
  -1  13   1 8058.03 1496.18  -1
  -1  13   1 6122.62 842.242  -1
   1 -13   0 1252.67 393.410   1
   1 -13   0  162.69 223.434   1
   1 -13   0  482.87 547.021   1
   1 -13   0  970.32 432.904   1
  -1 -13   0 1272.96 483.307   1
  -1 -13   0 1057.82 393.410   1
  -1 -13   0  448.40 566.004   1
   1  13   0  727.25 705.432   1
   1  13   0  190.77 107.419   1
   1  13   0 1550.29 521.056   1
   1  13   0  860.13 341.043   1
  -1  13   0 1638.23 825.223   1
  -1  13   0  984.29 430.722   1
  -1  13   0  825.88 317.041   1
   1 -13   1 1978.61 943.704   1
   1 -13   1 1816.28 577.351   1
   1 -13   1 1337.33 452.760   1
  -1 -13  -1  455.60 374.427   1
  -1 -13  -1  938.69 174.863   1
  -1 -13  -1  946.98 521.274   1
  -1 -13  -1   82.96 466.070   1
   1  13   1  833.73 147.414   1
   1  13   1   49.95 662.229   1
   1  13   1 2662.01 813.877   1
   1  13   1 1190.05 379.227   1
  -1  13  -1 1614.01 876.717   1
  -1  13  -1 1114.55 481.998   1
  -1  13  -1 1277.98 481.125   1
   1 -13   2  15806. 2941.30   1
   1 -13   2 5607.67 2062.84   1
   1 -13   2 7715.46 1669.43   1
  -1 -13  -2  14805. 2718.74   1
  -1 -13  -2 7089.24 1577.13   1
  -1 -13  -2  10892. 3698.45   1
   1  13   2 7499.45 2609.64   1
   1  13   2  11146. 2459.09   1
   1  13   2  10295. 1916.43   1
  -1  13  -2 7492.90 2648.92   1
  -1  13  -2  10467. 1977.96   1
  -1  13  -2  11752. 2533.27   1
   1 -13   3  662.23 612.262   1
   1 -13   3 1282.78 1046.04   1
   1 -13   3 1426.57 420.685   1
  -1 -13  -3 1629.94 544.839   1
  -1 -13  -3 1805.37 656.338   1
  -1 -13  -3 1751.91 773.946   1
   1  13   3 1227.36 746.454   1
   1  13   3 1615.32 901.156   1
   1  13   3 1257.04 454.287   1
  -1  13  -3 2188.52 1115.21   1
  -1  13  -3 1381.63 577.132   1
  -1  13  -3 1368.10 513.855   1
   1 -13   4 1609.42 1241.11   1
   1 -13   4 -548.33 762.382   1
   1 -13   4  838.10 373.554   1
  -1 -13  -4 -209.12 506.873   1
  -1 -13  -4  287.58 458.215   1
  -1 -13  -4  713.72 494.435   1
   1  13   4  108.40 831.332   1
   1  13   4   15.64 529.129   1
   1  13   4 -168.49 479.162   1
  -1  13  -4  497.93 930.612   1
  -1  13  -4  853.37 420.248   1
  -1  13  -4  720.05 787.038   1
   1 -13   5 1857.08 864.935   1
   1 -13   5 1892.43 1386.43   1
   1 -13   5  789.87 415.448   1
  -1 -13  -5 1551.82 676.849   1
  -1 -13  -5  516.69 536.984   1
   1  13   5 3102.77 1192.23   1
   1  13   5 2073.53 639.100   1
  -1  13  -5 1567.53 993.453   1
  -1  13  -5 1673.79 901.374   1
  -1  13  -5 1213.40 469.561   1
   1 -13   6  237.40 811.258   1
   1 -13   6 -469.34 965.087   1
   1 -13   6 2060.22 597.643   1
  -1 -13  -6  788.78 513.637   1
  -1 -13  -6  644.34 617.281   1
   1  13   6 1593.93 799.257   1
   1  13   6  495.53 618.153   1
  -1  13  -6 1222.12 939.122   1
  -1  13  -6  174.58 1014.18   1
  -1  13  -6 2049.53 612.698   1
   1 -13   7  879.77 942.613   1
   1 -13   7  836.57 982.980   1
   1 -13   7  319.44 413.266   1
  -1 -13  -7 2476.54 979.488   1
  -1 -13  -7  783.11 650.228   1
   1  13   7  552.48 694.523   1
   1  13   7 2411.08 988.871   1
  -1  13  -7 1807.11 1043.86   1
  -1  13  -7 -289.98 1120.66   1
  -1  13  -7  209.67 523.238   1
   1 -13   8 -1402.8 1042.98   1
   1 -13   8 -496.62 1004.80   1
   1 -13   8 -508.40 507.309   1
  -1 -13  -8 -189.09 498.363   1
  -1 -13  -8  452.54 764.128   1
   1  13   8  142.07 579.532   1
   1  13   8  140.37 870.390   1
  -1  13  -8 1208.60 988.653   1
  -1  13  -8 1051.28 638.664   1
  -1  13  -8 2419.81 1323.15   1
   1 -13   9 1109.97 608.335   1
  -1 -13  -9  673.58 756.709   1
  -1 -13  -9  837.88 576.696   1
   1  13   9  242.64 636.264   1
   1  13   9 -644.34 856.425   1
  -1  13  -9  505.56 852.279   1
  -1  13  -9  -69.93 668.339   1
  -1  13  -9  560.11 1200.09   1
   1 -13  10  310.93 584.333   1
  -1 -13 -10  769.15 551.385   1
  -1 -13 -10  880.86 751.472   1
   1  13  10 1590.66 770.673   1
   1  13  10  160.44 931.267   1
  -1  13 -10 -208.42 714.378   1
   1 -13  11 -695.61 608.553   1
  -1 -13 -11  338.42 662.011   1
  -1 -13 -11  833.73 570.150   1
   1  13  11 -258.78 927.121   1
  -1  13 -11  692.34 791.184   1
   1 -13  12 1024.00 649.574   1
  -1  13 -12 -504.25 778.310   1
   1 -15 -10 -372.24 574.732   1
  -1 -15  10  890.25 788.784   1
  -1 -15  10  551.39 619.026   1
   1  15 -10   46.32 596.115   1
   1  15 -10  360.68 596.552   1
  -1  15  10 -440.98 691.250   1
   1 -15  -9  416.98 480.253   1
   1 -15  -9  -35.04 767.837   1
  -1 -15   9 -164.28 731.616   1
  -1 -15   9 -309.84 786.384   1
  -1 -15   9  229.98 529.129   1
   1  15  -9  748.64 706.523   1
   1  15  -9  -62.21 561.204   1
   1  15  -9   99.65 918.611   1
  -1  15   9  592.84 609.862   1
  -1  15   9  -42.02 790.966   1
   1 -15  -8  709.58 740.999   1
   1 -15  -8 1100.59 567.750   1
  -1 -15   8  369.41 775.256   1
  -1 -15   8   81.02 524.547   1
  -1 -15   8 1269.91 815.404   1
   1  15  -8 -360.46 700.414   1
   1  15  -8 1543.75 665.939   1
   1  15  -8  118.04 906.392   1
  -1  15   8 -142.26 487.890   1
  -1  15   8  346.06 755.836   1
   1 -15  -7  845.08 630.591   1
   1 -15  -7  973.16 537.857   1
  -1 -15   7 1415.88 595.461   1
  -1 -15   7 1240.89 873.226   1
  -1 -15   7 -216.63 845.515   1
   1  15  -7 1343.22 841.151   1
   1  15  -7 1849.88 650.447   1
   1  15  -7  540.48 862.098   1
  -1  15   7 2091.64 883.700   1
  -1  15   7 1495.53 686.231   1
   1 -15  -6  506.65 445.341   1
   1 -15  -6  404.10 552.694   1
  -1 -15   6  397.77 958.105   1
  -1 -15   6  121.82 836.351   1
  -1 -15   6  352.39 461.488   1
   1  15  -6 -184.70 740.126   1
   1  15  -6  428.32 479.162   1
   1  15  -6  238.71 788.129   1
  -1  15   6  201.35 548.985   1
  -1  15   6  485.71 559.240   1
   1 -15  -5 1006.98 560.113   1
   1 -15  -5  822.82 559.895   1
  -1 -15   5 1352.61 1150.99   1
  -1 -15   5  -29.26 859.698   1
  -1 -15   5 -813.66 471.743   1
   1  15  -5 -303.95 863.626   1
   1  15  -5   28.87 484.398   1
   1  15  -5 -1529.6 969.015   1
  -1  15   5  426.36 562.295   1
  -1  15   5 -793.15 549.858   1
   1 -15  -4  851.19 532.184   1
   1 -15  -4 1046.91 555.531   1
   1 -15  -4  431.81 461.051   1
  -1 -15   4 1368.10 878.899   1
  -1 -15   4  884.57 919.921   1
  -1 -15   4 1037.97 401.483   1
   1  15  -4  309.19 505.782   1
   1  15  -4  926.68 878.463   1
   1  15  -4  509.05 797.948   1
  -1  15   4 -193.76 511.455   1
  -1  15   4  582.37 730.089   1
  -1  15   4  809.29 484.835   1
   1 -15  -3  407.59 443.377   1
   1 -15  -3 -182.24 508.618   1
   1 -15  -3  819.99 551.167   1
  -1 -15   3  140.02 650.883   1
  -1 -15   3  470.87 361.553   1
  -1 -15   3  843.77 919.484   1
   1  15  -3 1152.30 901.156   1
   1  15  -3  304.17 499.454   1
   1  15  -3  456.91 620.772   1
  -1  15   3 -273.84 647.174   1
  -1  15   3  837.44 790.093   1
  -1  15   3  583.90 371.808   1
   1 -15  -2 2747.11 1072.22   1
   1 -15  -2 1638.01 571.459   1
   1 -15  -2 2044.95 680.776   1
  -1 -15   2  948.29 477.198   1
  -1 -15   2 1705.21 911.193   1
  -1 -15   2 1225.40 548.548   1
  -1 -15   2 2535.45 646.301   1
   1  15  -2 1622.30 569.059   1
   1  15  -2 2631.46 1185.03   1
   1  15  -2  853.59 437.268   1
   1  15  -2 1259.44 515.164   1
  -1  15   2 1161.90 755.618   1
  -1  15   2 1571.89 759.982   1
  -1  15   2 2034.04 535.457   1
   1 -15  -1   52.69 454.069  -1
   1 -15  -1  321.19  86.690  -1
   1 -15  -1  114.25 464.979  -1
   1 -15  -1 -435.52 488.544  -1
  -1 -15   1 1319.66 816.277  -1
  -1 -15   1   67.60 264.019  -1
  -1 -15   1  103.95 444.686  -1
  -1 -15   1  994.98 418.939  -1
   1  15  -1  380.10 431.595  -1
   1  15  -1  987.34 782.020  -1
   1  15  -1  534.37 219.288  -1
   1  15  -1  162.56 398.647  -1
  -1  15   1  250.49  76.827  -1
  -1  15   1 1476.76 783.983  -1
  -1  15   1  314.20 554.440  -1
  -1  15   1  124.98 375.736  -1
   1 -15   0 1950.90 486.580   1
   1 -15   0 1182.19 240.235   1
   1 -15   0 1200.74 685.140   1
   1 -15   0 1072.44 498.363   1
  -1 -15   0 1570.15 560.986   1
  -1 -15   0 2391.44 567.968   1
  -1 -15   0 1380.32 737.289   1
   1  15   0 1258.78 798.821   1
   1  15   0 1108.88 516.692   1
   1  15   0  996.07 373.118   1
  -1  15   0  766.31 749.727   1
  -1  15   0 1184.16 485.926   1
  -1  15   0 1449.92 394.501   1
  -1  15   0 1012.44 178.769   1
   1 -15   1  937.38 465.633   1
   1 -15   1 1164.52 780.274   1
   1 -15   1 1336.46 447.959   1
  -1 -15  -1 1079.20 502.727   1
  -1 -15  -1 1716.78 605.498   1
  -1 -15  -1 1248.53 199.694   1
  -1 -15  -1  -23.28 471.743   1
   1  15   1 1060.22 175.562   1
   1  15   1  225.18 613.571   1
   1  15   1 1241.33 644.555   1
   1  15   1 1136.37 453.851   1
  -1  15  -1  -93.58 614.226   1
  -1  15  -1 1013.31 436.831   1
  -1  15  -1  795.11 435.959   1
   1 -15   2 -719.62 750.818   1
   1 -15   2  789.66 535.238   1
   1 -15   2  466.72 345.625   1
  -1 -15  -2    5.46 495.526   1
  -1 -15  -2  523.24 316.605   1
  -1 -15  -2  537.42 616.844   1
  -1 -15  -2  225.40 502.727   1
   1  15   2  -41.92 139.734   1
   1  15   2 -106.04 713.287   1
   1  15   2 -1480.7 863.407   1
   1  15   2  308.09 393.410   1
  -1  15  -2 -308.75 734.889   1
  -1  15  -2 -411.74 432.686   1
  -1  15  -2  644.34 418.503   1
   1 -15   3 1939.78 1090.55   1
   1 -15   3 -403.88 673.576   1
   1 -15   3  407.16 334.497   1
  -1 -15  -3 -179.29 711.760   1
  -1 -15  -3 1671.61 753.872   1
  -1 -15  -3  205.52 511.891   1
  -1 -15  -3  849.22 569.059   1
   1  15   3 -312.24 858.607   1
   1  15   3 1293.26 798.821   1
   1  15   3  452.76 426.140   1
  -1  15  -3 1173.25 958.105   1
  -1  15  -3 -399.30 432.686   1
  -1  15  -3  403.67 620.554   1
   1 -15   4  327.51 948.723   1
   1 -15   4 -1093.4 797.512   1
   1 -15   4 -177.48 396.683   1
  -1 -15  -4  569.93 508.836   1
  -1 -15  -4  316.17 495.308   1
  -1 -15  -4  305.26 502.291   1
   1  15   4  950.47 858.389   1
   1  15   4 -262.27 523.892   1
   1  15   4  551.39 517.346   1
  -1  15  -4  588.48 849.006   1
  -1  15  -4  -52.56 483.307   1
  -1  15  -4  475.67 760.636   1
   1 -15   5 -847.04 780.056   1
   1 -15   5 -763.47 1025.53   1
   1 -15   5 -745.58 464.324   1
  -1 -15  -5  684.92 575.823   1
  -1 -15  -5  213.62 445.341   1
   1  15   5  624.70 571.023   1
   1  15   5  340.82 540.257   1
  -1  15  -5 1832.64 1061.31   1
  -1  15  -5    7.30 418.939   1
  -1  15  -5 1824.79 902.465   1
   1 -15   6 -271.00 872.353   1
   1 -15   6  803.40 1109.53   1
   1 -15   6  279.73 450.578   1
  -1 -15  -6  -23.13 393.846   1
  -1 -15  -6  741.00 582.805   1
   1  15   6   51.65 561.422   1
   1  15   6 -286.49 512.546   1
  -1  15  -6 -180.27 789.002   1
  -1  15  -6  322.06 422.430   1
  -1  15  -6  270.56 908.356   1
   1 -15   7 1289.11 827.623   1
   1 -15   7  408.68 849.225   1
   1 -15   7  104.43 498.145   1
  -1 -15  -7  -98.45 409.993   1
  -1 -15  -7  451.89 571.677   1
   1  15   7 -414.58 536.329   1
   1  15   7  523.24 561.640   1
  -1  15  -7  367.23 649.356   1
  -1  15  -7  575.82 517.346   1
  -1  15  -7  775.69 987.344   1
   1 -15   8  636.48 789.002   1
   1 -15   8 -409.77 691.686   1
   1 -15   8  655.90 510.800   1
  -1 -15  -8  493.78 455.378   1
  -1 -15  -8 1047.78 769.146   1
   1  15   8 -425.27 533.275   1
   1  15   8  380.75 728.998   1
  -1  15  -8  -37.12 657.865   1
  -1  15  -8    0.80 552.476   1
  -1  15  -8 2041.46 1015.71   1
   1 -15   9   80.49 810.167   1
   1 -15   9  241.33 719.179   1
   1 -15   9  215.14 525.419   1
  -1 -15  -9 -520.18 777.874   1
  -1 -15  -9   45.82 471.307   1
   1  15   9 1303.73 743.617   1
   1  15   9  226.49 783.547   1
  -1  15  -9  841.37 681.431   1
  -1  15  -9 -540.91 609.207   1
  -1  15  -9 -251.80 993.889   1
   1 -15  10 -322.06 642.155   1
   1 -15  10   22.21 598.952   1
  -1 -15 -10    4.25 566.441   1
   1  15  10 -329.48 684.922   1
  -1  15 -10  958.32 726.598   1
  -1  15 -10   49.57 581.933   1
   1 -17  -7  436.18 458.869   1
  -1 -17   7 -878.46 816.495   1
  -1 -17   7 -136.55 538.075   1
   1  17  -7  -91.34 551.603   1
   1  17  -7 -169.21 482.871   1
  -1  17   7 1170.63 730.961   1
   1 -17  -6  354.13 476.107   1
  -1 -17   6 -329.70 674.230   1
  -1 -17   6   15.81 519.965   1
   1  17  -6 -154.79 591.315   1
   1  17  -6 1005.45 543.966   1
  -1  17   6 -190.79 582.151   1
   1 -17  -5  814.31 605.716   1
   1 -17  -5   -2.88 454.069   1
  -1 -17   5 -594.81 783.547   1
  -1 -17   5 -684.49 754.309   1
  -1 -17   5   87.67 522.365   1
   1  17  -5 -399.74 682.740   1
   1  17  -5   71.05 593.934   1
   1  17  -5 -305.91 674.012   1
  -1  17   5  248.09 584.769   1
  -1  17   5 -945.89 587.169   1
   1 -17  -4  272.97 468.034  -1
   1 -17  -4  405.41 444.686  -1
   1 -17  -4 1169.54 715.688  -1
  -1 -17   4 -525.20 690.813  -1
  -1 -17   4 -607.24 817.804  -1
  -1 -17   4  722.89 509.927  -1
   1  17  -4  790.31 634.300  -1
   1  17  -4 1563.60 926.685  -1
   1  17  -4  284.97 679.249  -1
  -1  17   4 1036.44 688.195  -1
  -1  17   4  610.95 843.333  -1
  -1  17   4  270.78 537.420  -1
   1 -17  -3 1151.65 622.517   1
   1 -17  -3  654.37 439.886   1
   1 -17  -3 1477.20 751.472   1
  -1 -17   3 1913.81 845.515   1
  -1 -17   3   58.76 762.600   1
  -1 -17   3 1059.13 488.326   1
   1  17  -3  531.53 530.656   1
   1  17  -3  782.89 840.933   1
   1  17  -3  489.42 696.486   1
  -1  17   3  279.07 597.206   1
  -1  17   3  113.68 802.312   1
  -1  17   3 1797.73 582.369   1
   1 -17  -2  628.41 561.640   1
   1 -17  -2 -255.51 369.190   1
   1 -17  -2  972.29 523.456   1
   1 -17  -2  168.56 721.143   1
  -1 -17   2    9.80 344.316   1
  -1 -17   2 1744.93 563.604   1
  -1 -17   2  860.35 807.112   1
  -1 -17   2  226.49 575.605   1
   1  17  -2   84.57 340.606   1
   1  17  -2  617.28 487.017   1
   1  17  -2  595.24 586.733   1
   1  17  -2  274.06 703.905   1
  -1  17   2  -24.61 553.567   1
  -1  17   2 1268.16 857.734   1
  -1  17   2 1760.64 545.712   1
   1 -17  -1  811.26 464.542   1
   1 -17  -1  902.90 137.857   1
   1 -17  -1 1366.35 651.756   1
   1 -17  -1  874.32 651.101   1
  -1 -17   1  738.82 263.801   1
  -1 -17   1 1185.90 502.072   1
  -1 -17   1  836.35 758.454   1
  -1 -17   1 1795.33 613.353   1
   1  17  -1  615.97 463.451   1
   1  17  -1 1188.52 477.198   1
   1  17  -1 1499.67 897.664   1
  -1  17   1  889.37 648.265   1
  -1  17   1  228.89 585.206   1
  -1  17   1 1357.41 462.360   1
  -1  17   1  868.64 140.999   1
   1 -17   0  419.81 332.097   1
   1 -17   0  836.79 653.720   1
   1 -17   0 -193.96 168.558   1
   1 -17   0  449.05 545.275   1
  -1 -17   0   -0.17 147.414   1
  -1 -17   0 1254.64 406.502   1
  -1 -17   0  903.34 639.755   1
  -1 -17   0 -165.61 545.494   1
   1  17   0   25.33 631.245   1
   1  17   0  538.29 334.279   1
   1  17   0    4.80 473.270   1
  -1  17   0 2195.07 1049.53   1
  -1  17   0  912.07 457.778   1
  -1  17   0   -6.89 293.257   1
  -1  17   0  -11.83 120.860   1
   1 -17   1  237.40 547.457   1
   1 -17   1  166.48 602.661   1
   1 -17   1  587.61 417.412   1
  -1 -17  -1  535.24 416.757   1
  -1 -17  -1  156.75  78.769   1
  -1 -17  -1  594.37 480.034   1
  -1 -17  -1  253.55 639.973   1
   1  17   1  223.22 102.138   1
   1  17   1  521.06 648.701   1
   1  17   1  310.49 381.409   1
   1  17   1 -404.32 576.696   1
  -1  17  -1   75.39 672.485   1
  -1  17  -1  281.04 383.373   1
  -1  17  -1  694.09 454.069   1
  -1  17  -1  105.50 283.875   1
   1 -17   2 -284.75 713.287   1
   1 -17   2 1324.68 678.594   1
   1 -17   2  821.08 439.232   1
  -1 -17  -2  -44.84 197.927   1
  -1 -17  -2 -280.17 445.123   1
  -1 -17  -2  155.44 525.638   1
  -1 -17  -2   58.54 672.485   1
   1  17   2   41.28 771.764   1
   1  17   2  480.47 629.718   1
   1  17   2   34.10 130.766   1
   1  17   2  478.51 429.194   1
  -1  17  -2  106.81 780.274   1
  -1  17  -2  285.84 407.156   1
  -1  17  -2  636.26 565.568   1
   1 -17   3 2930.39 941.958   1
   1 -17   3 2788.56 1272.96   1
   1 -17   3 1261.40 537.639   1
  -1 -17  -3  880.43 584.769   1
  -1 -17  -3 3224.96 1162.77   1
  -1 -17  -3  946.32 697.141   1
   1  17   3   21.84 829.369   1
   1  17   3 4667.24 1697.14   1
   1  17   3 3240.23 778.310   1
  -1  17  -3 3801.00 1537.86   1
  -1  17  -3 1853.81 679.467   1
  -1  17  -3 1505.56 783.111   1
   1 -17   4  -65.28 723.761   1
   1 -17   4 1439.45 900.283   1
   1 -17   4 -558.80 499.018   1
  -1 -17  -4  630.37 522.365   1
  -1 -17  -4 -967.27 669.212   1
  -1 -17  -4  602.88 484.617   1
   1  17   4 1799.91 865.153   1
   1  17   4  -43.55 896.792   1
   1  17   4  -72.79 419.812   1
  -1  17  -4  341.70 724.634   1
  -1  17  -4   59.02 543.312   1
  -1  17  -4  441.85 681.431   1
   1 -17   5 1036.22 831.987   1
   1 -17   5  241.11 740.780   1
   1 -17   5 1331.44 611.171   1
  -1 -17  -5 1046.69 606.807   1
  -1 -17  -5 1223.21 613.789   1
  -1 -17  -5  118.61 560.331   1
   1  17   5  493.56 903.774   1
   1  17   5  962.25 692.122   1
   1  17   5  967.49 574.514   1
  -1  17  -5  311.80 662.666   1
  -1  17  -5  523.46 488.326   1
  -1  17  -5  452.54 789.220   1
   1 -17   6 -418.50 668.775   1
   1 -17   6  151.76 563.604   1
  -1 -17  -6 -663.76 506.436   1
   1  17   6 -485.93 610.953   1
  -1  17  -6   92.95 523.019   1
  -1  17  -6  -89.50 467.597   1
   1 -17   7 -687.10 803.621   1
   1 -17   7   60.22 517.783   1
  -1 -17  -7  397.56 461.488   1
   1  17   7 -946.76 667.248   1
  -1  17  -7  525.42 623.608   1
  -1  17  -7 -493.34 462.360   1
   1  19  -3  130.94 301.985   1
   1 -19  -2    1.11 307.222   1
  -1 -19   2   86.95 234.344   1
   1  19  -2 -478.73 252.018   1
   1 -19  -1   37.40  60.375   1
  -1 -19   1 -242.64 152.367   1
   1  19  -1  -78.77 160.899   1
  -1  19   1   -2.98  65.917   1
   1 -19   0  248.96 125.442   1
  -1 -19   0  183.00 113.070   1
   1  19   0  255.73 137.966   1
  -1  19   0   94.83 103.076   1
  -1 -19  -1  568.40 113.070   1
   1  19   1  418.72 125.638   1
  -1  19  -1   66.35 229.980   1
  -1 -19  -2  -20.03 117.172   1
   1  19   2   99.72 103.622   1
  -1 -19  -3  -54.61 453.633   1
   1  19   3  233.91 134.781   1
  -1 -19  -4 -105.41 351.734   1
   2   0  -1  23107. 4224.30   1
   2   0  -1  25355. 3449.70   1
   2   0  -1  29915. 6323.36   1
  -2   0   1  34410. 7270.34   1
  -2   0   1  21885. 4001.74   1
   2   0   0  526.07 183.024   1
   2   0   0 1639.54 400.829   1
  -2   0   0 1161.25 338.424   1
   2   0   1 299803.  40519.   1
   2   0   1 193628.  34715.   1
  -2   0  -1 253327.  45429.   1
  -2  -2   4  67008.  14183.   1
   2   2  -4  75169.  15896.   1
  -2  -2   3 104277.  22038.   1
   2   2  -3 105084.  22191.   1
  -2  -2   2  29806. 5385.11   1
  -2  -2   2  33973. 7187.42   1
   2   2  -2  20377. 3715.90   1
   2   2  -2  50425.  10657.   1
   2  -2  -1  21132. 2869.30   1
  -2  -2   1  17340. 5836.78   1
  -2  -2   1  23173. 3150.77   1
  -2  -2   1  24700. 5225.83   1
  -2  -2   1  18337. 3316.60   1
   2   2  -1  19219. 6473.92   1
   2   2  -1  21333. 2895.48   1
   2   2  -1  25289. 5345.84   1
   2   2  -1  21519. 3888.28   1
  -2   2   1  26075. 3539.16   1
   2  -2   0  35392. 6349.55  -1
   2  -2   0  30308.  10142.  -1
   2  -2   0  33275. 7036.87  -1
  -2  -2   0  34366. 4651.97  -1
  -2  -2   0  33297. 5989.52  -1
  -2  -2   0  31595. 6679.02  -1
   2   2   0  37595. 5088.36  -1
   2   2   0  39341.  13173.  -1
   2   2   0  36068. 6487.01  -1
   2   2   0  26860. 5681.86  -1
  -2   2   0  49291.  16494.  -1
  -2   2   0  39625. 5358.93  -1
  -2   2   0  32751. 5878.24  -1
  -2  -2  -1 143312.  25704.   1
  -2  -2  -1 162099.  34235.   1
   2   2   1 139581.  25027.   1
   2   2   1 179380.  37879.   1
  -2  -2  -2 366790.  65743.  -1
   2   2   2 317477.  56928.  -1
  -2  -2  -4  961.81 762.164   1
   2   2   4  685.58 1320.53   1
  -2  -4   7  569.50 663.757   1
   2   4  -7 1368.10 662.666   1
  -2  -4   6 2443.81 874.099   1
   2   4  -6 3990.83 1074.84   1
  -2  -4   5 7822.38 1744.49   1
   2   4  -5 6083.35 1367.01   1
  -2  -4   4  94349.  17004.   1
  -2  -4   4 170019.  35915.   1
   2   4  -4 111957.  20177.   1
   2   4  -4 161073.  34017.   1
   2  -4  -3 8383.15 1830.02   1
  -2  -4   3  26533. 8941.73   1
  -2  -4   3  43989. 9303.94   1
   2   4  -3  40017. 8463.88   1
   2   4  -3  33057.  11117.   1
   2   4  -3  11608. 2214.70   1
  -2   4   3  10013. 2186.34   1
   2  -4  -2  12538. 2328.17  -1
  -2  -4   2  18451. 3360.24  -1
  -2  -4   2  20565. 2825.66  -1
  -2  -4   2  36657. 7748.19  -1
   2   4  -2  19513. 2681.65  -1
   2   4  -2 7405.62 2627.10  -1
   2   4  -2  29697. 6277.54  -1
   2   4  -2  22409. 4069.38  -1
  -2   4   2 9081.38 3089.68  -1
  -2   4   2  16400. 3028.58  -1
   2  -4  -1  33712. 6057.16   1
   2  -4  -1  34977.  11711.   1
   2  -4  -1  32337. 4379.22   1
  -2  -4   1  31770. 4305.04   1
  -2  -4   1  25027. 8404.97   1
  -2  -4   1  35239. 6347.36   1
  -2  -4   1  46105. 9746.88   1
   2   4  -1  32184.  10803.   1
   2   4  -1  41916. 8863.18   1
   2   4  -1  40192. 7231.06   1
   2   4  -1  32206. 4363.95   1
  -2   4   1  35239.  11802.   1
  -2   4   1  28933. 5199.65   1
  -2   4   1  31399. 4252.67   1
   2  -4   0 138512.  24831.   1
   2  -4   0 125289.  16932.   1
   2  -4   0 127384.  42614.   1
   2  -4   0 163277.  34475.   1
  -2  -4   0 143988.  19454.   1
  -2  -4   0 151189.  31922.   1
  -2  -4   0 114510.  38337.   1
  -2  -4   0 184028.  32991.   1
   2   4   0 150993.  20401.   1
   2   4   0 129937.  27427.   1
   2   4   0 178115.  31944.   1
   2   4   0 162753.  54462.   1
  -2   4   0 140432.  47000.   1
  -2   4   0 131006.  27667.   1
  -2   4   0 166834.  29915.   1
  -2   4   0 134977.  18241.   1
   2  -4   1 188959.  33886.   1
   2  -4   1 229980.  77002.   1
   2  -4   1 151931.  32075.   1
  -2  -4  -1 193105.  34628.   1
  -2  -4  -1 183984.  24853.   1
  -2  -4  -1 215055.  71962.   1
  -2  -4  -1 131813.  27842.   1
   2   4   1 154877.  20930.   1
   2   4   1 153022.  32315.   1
   2   4   1 152716.  27384.   1
   2   4   1 220379.  73773.   1
  -2   4  -1 237617.  79468.   1
  -2   4  -1 183897.  38839.   1
  -2   4  -1 183831.  32970.   1
   2  -4   2 787693. 263583.   1
   2  -4   2 551603. 116452.   1
  -2  -4  -2 818022. 273620.   1
  -2  -4  -2 733798. 131486.   1
   2   4   2 968360. 324023.   1
   2   4   2 716779. 128496.   1
  -2   4  -2 682304. 228235.   1
  -2   4  -2 727907. 153698.   1
  -2  -4  -3  28562. 9596.32   1
  -2  -4  -3 3600.26 864.498   1
   2   4   3  29653. 9956.35   1
   2   4   3 4881.08 1098.62   1
  -2  -4  -4 2528.91 1116.52   1
  -2  -4  -4 2638.01 828.278   1
   2   4   4 2738.38 1159.72   1
   2   4   4 3264.23 1061.75   1
  -2  -4  -5  258.56 946.322   1
   2   4   5 -809.73 1284.75   1
  -2  -4  -6 4374.86 1703.25  -1
   2   4   6 -904.21 1878.68  -1
  -2  -4  -7  15564. 3277.33   1
  -2  -6   9 5526.94 1363.30   1
   2   6  -9 6436.83 1566.22   1
  -2  -6   8 3999.56 1102.55   1
   2   6  -8 4577.78 1249.40   1
  -2  -6   7 1321.19 661.575   1
   2   6  -7 2018.98 701.505   1
  -2  -6   6 4108.66 1031.42   1
   2   6  -6 5304.38 1219.51   1
   2  -6  -5  29435. 5529.12   1
  -2  -6   5  45429. 8370.05   1
  -2  -6   5  42243. 8937.37   1
   2   6  -5  38446. 7366.35   1
   2   6  -5  41981. 8885.00   1
  -2   6   5  30089. 5893.51   1
   2   6  -4  58804.  19727.   1
   2   6  -4  39363. 7174.33   1
  -2   6   4  48483.  16256.   1
  -2   6   4  59699.  10838.   1
   2  -6  -3  96552.  32315.   1
   2  -6  -3 103447.  18573.   1
  -2  -6   3 117499.  39363.   1
  -2  -6   3 131333.  23565.   1
  -2  -6   3 119289.  25202.   1
   2   6  -3 109033.  36526.   1
   2   6  -3 103273.  21811.   1
   2   6  -3 127318.  22867.   1
  -2   6   3 115296.  38599.   1
  -2   6   3 126555.  22714.   1
   2  -6  -2  13528. 4547.24   1
   2  -6  -2  11274. 2064.15   1
  -2  -6   2  12391. 1764.78   1
  -2  -6   2  16736. 5684.04   1
  -2  -6   2  21126. 4475.23   1
  -2  -6   2  11855. 2190.70   1
   2   6  -2  18488. 6262.27   1
   2   6  -2  13116. 2788.56   1
   2   6  -2  16341. 2989.31   1
   2   6  -2  15610. 2177.17   1
  -2   6   2  19784. 6641.93   1
   2  -6  -1 8649.35 1584.33   1
   2  -6  -1 7536.54 1045.38   1
   2  -6  -1  16598. 5577.13   1
   2  -6  -1 7848.56 1685.36   1
  -2  -6   1  12106. 4108.66   1
  -2  -6   1 8568.61 1185.90   1
  -2  -6   1 6068.07 1169.32   1
  -2  -6   1 8719.17 1864.28   1
   2   6  -1 7523.45 1613.13   1
   2   6  -1  17179. 5806.23   1
   2   6  -1 7920.57 1090.99   1
   2   6  -1 8435.51 1571.68   1
  -2   6   1 8020.94 1106.48   1
  -2   6   1  19256. 6473.92   1
  -2   6   1 8826.09 1890.03   1
  -2   6   1 6901.59 1277.55   1
   2  -6   0 2467.81 519.310   1
   2  -6   0 3187.86 454.287   1
   2  -6   0 3155.14 1116.95   1
   2  -6   0 6689.93 1436.18   1
  -2  -6   0 5454.94 1200.52   1
  -2  -6   0 4298.49 608.116   1
  -2  -6   0 4841.80 1698.23   1
  -2  -6   0 1595.24 447.305   1
   2   6   0 2768.93 1059.79   1
   2   6   0 4339.95 958.760   1
   2   6   0 3510.80 502.945   1
  -2   6   0 2854.02 1045.60   1
  -2   6   0 4593.06 993.017   1
   2  -6   1 4741.43 915.775  -1
   2  -6   1  11780. 3984.29  -1
   2  -6   1 5607.67 1204.45  -1
  -2  -6  -1 4669.43 898.319  -1
  -2  -6  -1 9443.59 3196.59  -1
  -2  -6  -1 3227.14 489.417  -1
   2   6   1  14920. 5027.27  -1
   2   6   1 4241.76 607.025  -1
   2   6   1 5675.32 1245.25  -1
  -2   6  -1  13773. 4656.33  -1
  -2   6  -1 4455.59 881.518  -1
  -2   6  -1 4222.12 916.211  -1
   2  -6   2 165786.  29740.   1
   2  -6   2 162012.  54244.   1
   2  -6   2 172463.  36417.   1
  -2  -6  -2 151342.  27144.   1
  -2  -6  -2 194436.  65066.   1
  -2  -6  -2 145385.  30700.   1
   2   6   2 166245.  35108.   1
   2   6   2 157233.  52629.   1
   2   6   2 153589.  27558.   1
  -2   6  -2 178616.  59786.   1
  -2   6  -2 151713.  32031.   1
  -2   6  -2 155466.  27907.   1
   2  -6   3 166834.  29959.   1
   2  -6   3 148025.  49553.   1
   2  -6   3 150229.  31726.   1
  -2  -6  -3 143159.  47916.   1
  -2  -6  -3 134257.  24089.   1
   2   6   3 146803.  49138.   1
   2   6   3 138883.  24918.   1
  -2   6  -3 141741.  47458.   1
  -2   6  -3 109186.  19708.   1
  -2   6  -3 133428.  28169.   1
   2  -6   4  39297. 8335.14   1
  -2  -6  -4  55662.  18658.   1
  -2  -6  -4  32730. 5921.88   1
   2   6   4  62186.  20840.   1
   2   6   4  38817. 7017.23   1
  -2   6  -4  37290. 7905.29   1
  -2  -6  -5 2830.02 1320.09   1
  -2  -6  -5 2223.43 835.042   1
   2   6   5 2352.17 1221.69   1
   2   6   5 1211.65 895.482   1
  -2   6  -5 2288.89 767.837   1
  -2  -6  -6 1251.14 1018.98   1
   2   6   6 3019.85 1421.99   1
  -2  -6  -7  10936. 2330.35   1
   2   6   7 5725.50 2236.52   1
  -2  -6  -8 2208.16 1411.08   1
   2   6   8 2247.43 2245.25   1
  -2  -6  -9  960.72 1053.68   1
   2   6   9 -545.71 1861.88   1
  -2  -8  12 -473.92 584.333   1
  -2  -8  11  443.16 574.078   1
   2   8 -11 1001.53 899.628   1
  -2  -8  10 2810.38 903.338   1
   2   8 -10 1104.08 893.737   1
  -2  -8   9 3316.60 918.393   1
   2   8  -9 4294.13 1156.23   1
   2  -8  -8  989.09 1119.35   1
  -2  -8   8  435.30 500.763   1
   2   8  -8  352.83 495.526   1
  -2   8   8  220.82 1355.44   1
   2  -8  -7  919.70 1212.96   1
  -2  -8   7  459.31 409.775   1
   2   8  -7 5725.50 2500.54   1
   2   8  -7 -154.37 435.959   1
  -2   8   7 1157.10 1837.00   1
   2  -8  -6 2825.66 1126.77   1
  -2  -8   6 5249.83 1900.50   1
  -2  -8   6 4121.75 2025.09   1
  -2  -8   6 2380.53 631.900   1
   2   8  -6   17.25 1387.95   1
   2   8  -6 4154.48 980.143   1
   2   8  -6 2716.56 2474.36   1
  -2   8   6 4555.96 1897.23   1
   2  -8  -5 4850.53 1767.18   1
   2  -8  -5 3131.13 982.543   1
  -2  -8   5 2727.47 1534.80   1
  -2  -8   5 3737.72 1176.52   1
   2   8  -5 2775.47 1401.70   1
   2   8  -5 4300.67 1547.67   1
  -2   8   5 3536.98 1400.83   1
  -2   8   5 4067.20 1367.66   1
   2  -8  -4 1280.16 735.325   1
   2  -8  -4 5841.15 1245.69   1
  -2  -8   4 -937.81 1426.57   1
  -2  -8   4 3316.60 919.484   1
  -2  -8   4 5956.79 1301.77   1
   2   8  -4 -353.48 1204.45   1
   2   8  -4 3842.46 876.063   1
   2   8  -4 5182.19 1237.83   1
  -2   8   4 2954.39 1188.09   1
  -2   8   4 4350.86 1085.97   1
   2  -8  -3  59110.  19797.   1
   2  -8  -3  49313. 8869.73   1
  -2  -8   3  53589.  18001.   1
  -2  -8   3  40476. 7327.07   1
  -2  -8   3  53589.  11329.   1
   2   8  -3  46651. 8450.79   1
   2   8  -3  60637.  20345.   1
   2   8  -3  49618.  10489.   1
  -2   8   3  69081.  23129.   1
  -2   8   3  50142. 9024.65   1
   2  -8  -2 8079.85 1504.47   1
   2  -8  -2 4425.04 1544.40   1
  -2  -8   2 7333.62 1091.64   1
  -2  -8   2 8553.34 1840.28   1
  -2  -8   2 5849.87 2167.57   1
  -2  -8   2 7608.55 1458.21   1
   2   8  -2 7752.56 1679.90   1
   2   8  -2 5142.91 1920.79   1
   2   8  -2 7222.34 1410.21   1
   2   8  -2 7650.00 1118.92   1
  -2   8   2 5996.07 2073.53   1
  -2   8   2 6901.59 1295.00   1
   2  -8  -1 5258.56 990.398   1
   2  -8  -1 6410.64 2186.34   1
   2  -8  -1 8077.67 1739.03   1
  -2  -8   1 5413.48 763.255   1
  -2  -8   1 8518.43 2941.30   1
  -2  -8   1 5568.40 1228.23   1
   2   8  -1 6905.95 2441.63   1
   2   8  -1 4835.26 981.452   1
   2   8  -1 5788.78 808.640   1
  -2   8   1 5646.95 1955.05   1
  -2   8   1 5278.20 1168.45   1
   2  -8   0  10788. 3665.72   1
   2  -8   0  10002. 1821.51   1
   2  -8   0  10908. 2325.98   1
  -2  -8   0  10072. 1376.39   1
  -2  -8   0  12734. 4331.22   1
  -2  -8   0  10406. 1905.74   1
  -2  -8   0  10251. 2205.98   1
   2   8   0  14274. 3039.49   1
   2   8   0 7844.20 2749.29   1
   2   8   0 9975.99 1363.30   1
   2   8   0  10517. 1931.05   1
  -2   8   0 7032.50 2452.54   1
  -2   8   0  11449. 2437.27   1
  -2   8   0 9445.77 1723.32   1
   2  -8   1  15067. 5097.09  -1
   2  -8   1  23718. 4285.40  -1
   2  -8   1  12736. 2705.65  -1
  -2  -8  -1  15708. 2134.84  -1
  -2  -8  -1  16624. 5592.40  -1
  -2  -8  -1  18898. 3419.15  -1
  -2  -8  -1  13764. 2943.48  -1
   2   8   1  14534. 1977.09  -1
   2   8   1  14253. 3052.58  -1
   2   8   1  16764. 5651.31  -1
   2   8   1  17936. 3251.14  -1
  -2   8  -1  18833. 6356.09  -1
  -2   8  -1  17235. 3656.99  -1
  -2   8  -1  18776. 3401.70  -1
   2  -8   2  30700. 5557.49   1
   2  -8   2  37443.  12586.   1
   2  -8   2  28126. 5948.06   1
  -2  -8  -2  32271. 5821.51   1
  -2  -8  -2  29108. 9759.97   1
  -2  -8  -2  32970. 6984.50   1
   2   8   2  26227. 5574.95   1
   2   8   2  26206. 8799.90   1
   2   8   2  29653. 5354.57   1
  -2   8  -2  33973.  11423.   1
  -2   8  -2  30046. 6351.73   1
  -2   8  -2  30897. 5607.67   1
   2  -8   3  34519.  11656.   1
   2  -8   3  16203. 3004.58   1
  -2  -8  -3  28060. 9419.58   1
  -2  -8  -3  12603. 2328.17   1
   2   8   3  31639.  10622.   1
   2   8   3  17414. 3185.68   1
  -2   8  -3  35348.  11905.   1
  -2   8  -3  18108. 3388.61   1
   2  -8   4  15350. 3070.04   1
   2  -8   4  19049. 6519.74   1
   2  -8   4  12210. 2616.19   1
  -2  -8  -4  15492. 2854.02   1
  -2  -8  -4  11235. 3835.91   1
   2   8   4  13146. 4483.96   1
   2   8   4  11122. 2102.11   1
  -2   8  -4  15389. 5280.38   1
  -2   8  -4  14039. 2993.67   1
  -2   8  -4  15409. 3443.16   1
   2  -8   5  17611. 3761.72   1
  -2  -8  -5  15782. 5352.38   1
  -2  -8  -5  13090. 2474.36   1
   2   8   5  16522. 5601.13   1
   2   8   5  14152. 2668.55   1
  -2   8  -5  14000. 4865.80   1
  -2   8  -5  16411. 3502.07   1
   2  -8   6 8313.32 1865.81   1
  -2  -8  -6 7294.34 2557.27   1
   2   8   6  10312. 3558.80   1
  -2   8  -6 5991.70 1460.83   1
   2  -8   7  41785. 8865.36   1
  -2  -8  -7  30569.  10268.   1
   2   8   7  21407. 7220.15   1
  -2   8  -7  35413. 7538.72   1
  -2  -8  -9 1063.06 974.470   1
   2   8   9 -1753.9 1796.42   1
  -2  -8 -10 -117.70 804.930   1
   2   8  10   80.06 1255.51   1
  -2  -8 -11 -775.47 803.621   1
   2   8  11  828.71 1282.13   1
  -2  -8 -12  473.92 815.840   1
  -2 -10  14  418.07 497.708   1
   2  10 -14  320.31 1026.18   1
  -2 -10  13  -45.23 500.109   1
   2  10 -13  229.54 990.617   1
  -2 -10  12  304.60 573.859   1
   2  10 -12 -937.81 998.253   1
   2 -10 -11 1103.64 873.444  -1
  -2 -10  11  965.52 544.403  -1
   2  10 -11 1148.81 910.974  -1
   2 -10 -10 1081.17 920.357   1
  -2 -10  10 2142.70 739.689   1
   2  10 -10 1167.14 744.926   1
  -2  10  10  624.26 1144.45   1
   2 -10  -9  894.17 891.773   1
  -2 -10   9 1651.97 651.756   1
   2  10  -9 1600.04 662.011   1
  -2  10   9  299.15 1133.32   1
   2 -10  -8 2461.27 1036.00   1
  -2 -10   8 -945.23 1546.15   1
  -2 -10   8 2915.12 1757.36   1
  -2 -10   8 3301.33 871.262   1
   2  10  -8 3753.00 986.471   1
   2  10  -8 2677.28 1469.78   1
   2  10  -8 1001.53 2269.25   1
  -2  10   8 1066.33 1421.99   1
   2 -10  -7 1216.67 699.105   1
   2 -10  -7   81.34 822.823   1
  -2 -10   7 4675.97 2234.34   1
  -2 -10   7 -251.15 1702.81   1
  -2 -10   7  676.41 454.069   1
   2  10  -7  694.09 1321.84   1
   2  10  -7  181.80 483.962   1
   2  10  -7 3728.99 2435.08   1
  -2  10   7 1620.55 807.985   1
  -2  10   7 1810.82 1224.09   1
   2 -10  -6 1164.30 751.036   1
   2 -10  -6  351.73 721.143   1
  -2 -10   6 1177.18 1578.66   1
  -2 -10   6 1691.03 1131.35   1
   2  10  -6 3674.45 1746.23   1
   2  10  -6 3056.95 1602.66   1
  -2  10   6 1778.75 901.374   1
  -2  10   6   21.70 960.287   1
   2 -10  -5 2356.53 949.159   1
   2 -10  -5 7796.20 1544.84   1
  -2 -10   5 4571.24 2240.89   1
  -2 -10   5 4553.78 1216.67   1
  -2 -10   5 3397.33 799.257   1
   2  10  -5 3787.91 1830.68   1
   2  10  -5 3299.15 794.021   1
   2  10  -5 4062.84 1261.62   1
  -2  10   5 1344.10 712.851   1
   2 -10  -4  27166. 4911.62   1
   2 -10  -4  39668.  13297.   1
  -2 -10   4  29086. 9890.89   1
  -2 -10   4  26904. 4944.35   1
  -2 -10   4  33035. 6993.23   1
   2  10  -4  31726. 5830.24   1
   2  10  -4  30177.  10201.   1
   2  10  -4  28977. 6137.89   1
  -2  10   4  38272.  12834.   1
  -2  10   4  31660. 5718.96   1
   2 -10  -3  -19.88 523.456   1
   2 -10  -3  226.49 401.483   1
  -2 -10   3 -752.78 1188.52   1
  -2 -10   3 -350.86 562.513   1
   2  10  -3 1027.06 1068.95   1
   2  10  -3   40.69 542.221   1
   2  10  -3  530.00 648.919   1
  -2  10   3  507.53 584.551   1
  -2  10   3  500.54 404.756   1
   2 -10  -2  977.52 577.569   1
   2 -10  -2  982.33 380.536   1
   2 -10  -2 2528.91 649.574   1
  -2 -10   2 2295.44 701.287   1
  -2 -10   2 1046.69 909.011   1
  -2 -10   2 1550.73 475.889   1
   2  10  -2 2181.97 606.807   1
   2  10  -2 3113.68 1358.06   1
   2  10  -2 3392.97 817.586   1
  -2  10   2 1954.83 893.737   1
  -2  10   2 1709.36 468.470   1
  -2  10   2  461.71 512.546   1
   2 -10  -1 1372.46 619.026   1
   2 -10  -1 2915.12 615.317   1
   2 -10  -1 2875.84 719.615   1
  -2 -10   1 4723.98 967.269   1
  -2 -10   1 3104.95 466.724   1
  -2 -10   1 3458.43 816.931   1
  -2 -10   1 2312.89 1125.03   1
   2  10  -1 3403.88 502.291   1
   2  10  -1 3216.23 757.582   1
   2  10  -1 3488.98 781.802   1
   2  10  -1 1577.79 974.252   1
  -2  10   1  790.09 639.973   1
  -2  10   1 3827.18 953.741   1
  -2  10   1 3534.80 716.124   1
   2 -10   0  13131. 4449.05   1
   2 -10   0  10393. 1899.41   1
   2 -10   0 7030.32 1531.31   1
  -2 -10   0  12178. 2229.98   1
  -2 -10   0 9895.25 1353.48   1
  -2 -10   0 5930.61 1320.97   1
  -2 -10   0  13465. 4573.42   1
   2  10   0  10668. 1456.69   1
   2  10   0 9007.19 3115.86   1
   2  10   0 8625.35 1862.97   1
   2  10   0 8178.04 1530.00   1
  -2  10   0  10188. 3499.89   1
  -2  10   0 7674.00 1424.17   1
  -2  10   0  10399. 2223.43   1
   2 -10   1  31966.  10740.   1
   2 -10   1  24264. 4390.13   1
   2 -10   1  31442. 6652.84   1
  -2 -10  -1  32533. 4405.41   1
  -2 -10  -1  33602.  11270.   1
  -2 -10  -1  31442. 5670.95   1
  -2 -10  -1  31246. 6624.48   1
   2  10   1  32511. 6899.40   1
   2  10   1  35937.  12062.   1
   2  10   1  26969. 3654.81   1
   2  10   1  30831. 5561.85   1
  -2  10  -1  39886.  13400.   1
  -2  10  -1  37443. 7922.75   1
  -2  10  -1  26598. 4809.07   1
   2 -10   2  43138. 7770.01   1
   2 -10   2  49378.  16581.   1
   2 -10   2  37508. 7929.30   1
  -2 -10  -2  36875. 5526.94   1
  -2 -10  -2  46716.  15656.   1
  -2 -10  -2  51626. 9290.85   1
  -2 -10  -2  40148. 8505.34   1
   2  10   2  48483.  16260.   1
   2  10   2  41174. 8732.26   1
   2  10   2  37268. 5057.82   1
   2  10   2  43290. 7802.74   1
  -2  10  -2  46891.  15756.   1
  -2  10  -2  46651. 8402.78   1
  -2  10  -2  39014. 8250.05   1
   2 -10   3  16710. 3096.22   1
   2 -10   3  20668. 7076.14   1
   2 -10   3  17801. 3774.82   1
  -2 -10  -3  18536. 6242.63   1
  -2 -10  -3  23391. 4243.94   1
  -2 -10  -3  12771. 2747.11   1
   2  10   3  13391. 4547.24   1
   2  10   3  12588. 2782.02   1
   2  10   3  17465. 3192.23   1
  -2  10  -3  14213. 4907.26   1
   2 -10   4  19230. 3571.89  -1
   2 -10   4  27122. 9223.21  -1
   2 -10   4  21453. 4551.60  -1
  -2 -10  -4  28824. 9674.88  -1
  -2 -10  -4  23173. 4211.21  -1
   2  10   4  24089. 8108.22  -1
   2  10   4  23303. 4233.03  -1
  -2  10  -4  30220.  10231.  -1
  -2  10  -4  21231. 3995.20  -1
  -2  10  -4  20633. 4379.22  -1
   2 -10   5 1722.89 1490.07   1
   2 -10   5 2288.89 1481.56   1
   2 -10   5 1070.69 403.229   1
  -2 -10  -5 2912.94 1120.88   1
  -2 -10  -5 1676.19 579.314   1
   2  10   5 1433.34 775.910   1
   2  10   5 1381.19 593.061   1
  -2  10  -5 5625.13 2212.52   1
  -2  10  -5  227.58 1955.70   1
  -2  10  -5 2120.88 597.643   1
   2 -10   6 1835.70 1365.92  -1
   2 -10   6  679.69 449.269  -1
  -2 -10  -6  279.95 587.824  -1
  -2 -10  -6  799.91 587.824  -1
   2  10   6  837.01 684.922  -1
   2  10   6  869.30 657.429  -1
  -2  10  -6 2171.50 1428.10  -1
  -2  10  -6 -419.81 2459.09  -1
  -2  10  -6 1501.20 570.368  -1
   2 -10   7  826.97 500.327   1
  -2 -10  -7    0.01 596.334   1
  -2 -10  -7  197.49 649.574   1
   2  10   7 -450.14 626.227   1
   2  10   7  177.11 747.981   1
  -2  10  -7 1776.56 623.390   1
   2 -10   8 5461.48 1283.22   1
  -2 -10  -8 5297.83 1885.66   1
   2  10   8 5007.63 1781.80   1
  -2  10  -8 5784.42 1434.65   1
   2 -10   9 1346.71 647.174   1
  -2 -10  -9   46.21 525.638   1
  -2 -10  -9  832.64 754.309   1
   2  10   9  358.93 1116.30   1
  -2  10  -9 1789.87 805.367   1
  -2 -10 -10 1009.82 870.171   1
   2  10  10  899.63 1284.75   1
  -2 -10 -11  989.53 887.845   1
   2  10  11 -955.27 1185.69   1
  -2 -10 -12 1343.66 883.482   1
   2  10  12 -207.44 1164.74   1
  -2 -10 -13   95.51 701.287   1
   2  10  13 -218.85 975.343   1
  -2 -12  13  501.64 591.970   1
   2  12 -13  251.15 760.418   1
   2 -12 -12  508.18 763.909   1
  -2 -12  12  639.10 592.624   1
   2  12 -12  -60.18 731.180   1
  -2  12  12  570.37 878.463   1
   2 -12 -11 -317.48 847.479   1
  -2 -12  11  871.92 619.681   1
   2  12 -11 1691.90 855.552   1
  -2  12  11  881.30 1002.62   1
   2 -12 -10  104.06 806.676   1
  -2 -12  10  403.23 580.842   1
   2  12 -10 1204.23 1018.33   1
   2  12 -10  -36.66 734.453   1
  -2  12  10 -137.46 1100.15   1
   2 -12  -9  943.92 838.096   1
   2 -12  -9  758.24 540.911   1
  -2 -12   9  826.97 1147.28   1
  -2 -12   9 1193.54 1024.66   1
  -2 -12   9  926.90 552.258   1
   2  12  -9  644.77 991.271   1
   2  12  -9  766.96 614.008   1
   2  12  -9 2188.52 1310.71   1
  -2  12   9  867.99 1043.86   1
   2 -12  -8 3109.31 1187.87   1
   2 -12  -8  904.21 870.171   1
  -2 -12   8 1824.57 1165.39   1
  -2 -12   8 1710.23 1011.56   1
  -2 -12   8 2352.17 669.648   1
   2  12  -8  431.16 1176.52   1
   2  12  -8 1651.54 636.482   1
  -2  12   8 4006.11 1493.34   1
  -2  12   8   85.82 1141.39   1
   2 -12  -7  -82.57 682.304  -1
   2 -12  -7  825.66 553.567  -1
  -2 -12   7 -835.91 1209.03  -1
  -2 -12   7 -1072.4 1222.34  -1
  -2 -12   7  271.22 433.777  -1
   2  12  -7  678.16 908.792  -1
   2  12  -7   81.89 430.504  -1
   2  12  -7 -227.80 1403.66  -1
  -2  12   7  184.01 535.893  -1
  -2  12   7   -8.55 834.169  -1
   2 -12  -6 2132.66 727.470   1
   2 -12  -6  704.12 522.365   1
  -2 -12   6 1740.12 1496.62   1
  -2 -12   6 2058.26 1055.20   1
  -2 -12   6  598.73 384.464   1
   2  12  -6 1980.58 1293.69   1
   2  12  -6 1333.62 489.417   1
   2  12  -6  990.40 920.357   1
  -2  12   6  346.72 543.748   1
  -2  12   6  732.05 659.175   1
   2 -12  -5 2956.58 761.509   1
   2 -12  -5 4859.26 1692.99   1
  -2 -12   5 2947.85 1053.24   1
  -2 -12   5 2982.76 734.016   1
   2  12  -5 9367.22 3338.42   1
   2  12  -5 3399.52 826.532   1
   2  12  -5  536.55 924.066   1
  -2  12   5 5926.24 2065.02   1
  -2  12   5 2550.73 670.521   1
   2 -12  -4 3556.62 831.769   1
   2 -12  -4 6118.26 2103.64   1
  -2 -12   4 3779.18 1874.75   1
  -2 -12   4 6085.53 1339.51   1
  -2 -12   4 5919.70 1421.34   1
   2  12  -4 7289.98 2701.28   1
   2  12  -4 7433.99 1637.14   1
   2  12  -4 4281.03 1215.80   1
  -2  12   4 5919.70 2055.42   1
  -2  12   4 6674.66 1291.07   1
   2 -12  -3 1011.78 466.943   1
   2 -12  -3 1926.25 796.421   1
   2 -12  -3 1954.39 596.770   1
  -2 -12   3 2238.71 683.394   1
  -2 -12   3 1054.55 375.954   1
  -2 -12   3 2107.57 1240.45   1
   2  12  -3 1709.58 854.243   1
   2  12  -3 4377.04 1795.55   1
   2  12  -3 2273.62 637.355   1
   2  12  -3 1260.09 607.244   1
  -2  12   3 1797.95 814.095   1
  -2  12   3 2875.84 665.502   1
  -2  12   3  767.40 737.944   1
   2 -12  -2  12339. 4167.57   1
   2 -12  -2  20788. 3772.63   1
   2 -12  -2  12570. 2701.28   1
  -2 -12   2  17502. 2421.99   1
  -2 -12   2  10751. 3733.36   1
  -2 -12   2  16862. 3109.31   1
  -2 -12   2  14329. 3054.76   1
   2  12  -2  17663. 3768.27   1
   2  12  -2  10910. 3811.91   1
   2  12  -2  16352. 2275.80   1
   2  12  -2  12871. 2404.54   1
  -2  12   2  16230. 5496.39   1
  -2  12   2  16062. 3464.98   1
  -2  12   2  13476. 2465.63   1
   2 -12  -1  692.56 331.442   1
   2 -12  -1 1047.78 563.822   1
   2 -12  -1  340.61 387.301   1
  -2 -12   1  535.46 195.876   1
  -2 -12   1 2321.62 1110.19   1
  -2 -12   1  105.06 424.176   1
  -2 -12   1 1144.88 422.430   1
   2  12  -1 2382.72 1130.92   1
   2  12  -1  436.18 365.044   1
   2  12  -1    0.23 178.093   1
   2  12  -1  564.70 420.030   1
  -2  12   1 2043.20 926.248   1
  -2  12   1  190.18 289.112   1
  -2  12   1  354.57 472.179   1
   2 -12   0 2749.29 585.424   1
   2 -12   0 3109.31 1190.05   1
   2 -12   0 1205.10 449.050   1
  -2 -12   0 3303.51 674.667   1
  -2 -12   0 2304.17 647.392   1
  -2 -12   0 3288.24 469.561   1
  -2 -12   0 1841.80 836.133   1
   2  12   0 3877.37 1495.31   1
   2  12   0 2655.46 391.228   1
   2  12   0 3408.24 836.569   1
  -2  12   0 2021.38 936.504   1
  -2  12   0 5005.45 954.177   1
  -2  12   0 2301.98 598.734   1
   2 -12   1 2544.18 1143.57   1
   2 -12   1 2179.14 591.315   1
   2 -12   1 1181.76 392.319   1
  -2 -12  -1 1527.82 246.563   1
  -2 -12  -1 2692.56 1049.97   1
  -2 -12  -1 2267.07 545.494   1
  -2 -12  -1 2249.62 651.101   1
   2  12   1 1546.37 628.845   1
   2  12   1 2548.55 1083.35   1
   2  12   1 1988.00 293.476   1
   2  12   1 1463.23 428.540   1
  -2  12  -1 2585.64 1176.08   1
  -2  12  -1 3216.23 762.600   1
  -2  12  -1 1364.39 497.708   1
   2 -12   2 6692.12 2430.72   1
   2 -12   2 7425.26 1469.34   1
   2 -12   2 8684.26 1864.50   1
  -2 -12  -2 6015.70 921.230   1
  -2 -12  -2 6652.84 2301.98   1
  -2 -12  -2 5825.87 1133.97   1
  -2 -12  -2 6255.72 1400.39   1
   2  12   2 5786.60 814.749   1
   2  12   2 5793.14 1383.59   1
   2  12   2 7554.00 2631.46   1
   2  12   2 6792.49 1299.80   1
  -2  12  -2 8773.72 3087.49   1
  -2  12  -2 4800.34 1092.95   1
  -2  12  -2 7759.10 1520.18   1
   2 -12   3 4723.98 1258.78   1
   2 -12   3 7196.15 2664.19   1
   2 -12   3 6818.67 1482.22   1
  -2 -12  -3 4215.58 880.863   1
  -2 -12  -3 8692.99 2976.21   1
  -2 -12  -3 5256.38 1227.36   1
   2  12   3 9692.33 3329.69   1
   2  12   3 3211.87 708.487   1
  -2  12  -3 7104.51 2572.55   1
  -2  12  -3 5974.25 1323.37   1
  -2  12  -3 3781.36 1028.58   1
   2 -12   4 6401.91 1533.27   1
   2 -12   4 4682.52 2004.58   1
   2 -12   4 6002.61 1317.48   1
  -2 -12  -4 6391.00 2208.16   1
  -2 -12  -4 5468.03 1129.61   1
  -2 -12  -4  10094. 2201.61   1
   2  12   4 4586.51 1645.86   1
   2  12   4 6731.39 1325.77   1
  -2  12  -4 6227.36 2328.17   1
  -2  12  -4 6022.25 1328.39   1
   2 -12   5 -130.29 1029.67   1
   2 -12   5 1662.88 1437.70   1
   2 -12   5  365.70 361.335   1
  -2 -12  -5  901.81 519.092   1
  -2 -12  -5  307.66 509.273   1
   2  12   5  458.65 536.329   1
   2  12   5 1439.01 569.495   1
  -2  12  -5 1581.28 1219.51   1
  -2  12  -5  305.04 376.391   1
  -2  12  -5 -405.63 1153.17   1
   2 -12   6 1818.02 1190.49   1
   2 -12   6 -1594.4 1254.85   1
   2 -12   6  783.77 415.012   1
  -2 -12  -6  568.84 549.203   1
  -2 -12  -6  660.27 549.858   1
   2  12   6  440.10 588.042   1
   2  12   6  805.37 602.007   1
  -2  12  -6 1671.83 1128.08   1
  -2  12  -6  936.29 508.836   1
  -2  12  -6 -2345.6 1530.87   1
   2 -12   7 -264.67 1045.82   1
   2 -12   7 1420.47 1077.90   1
   2 -12   7  205.91 475.889   1
  -2 -12  -7  773.73 567.095   1
  -2 -12  -7 -709.80 625.354   1
   2  12   7   73.86 517.346   1
   2  12   7  931.27 699.323   1
  -2  12  -7  638.45 912.938   1
  -2  12  -7 -251.58 535.457   1
  -2  12  -7 1120.44 1336.90   1
   2 -12   8 3733.36 954.832   1
  -2 -12  -8 5295.65 1860.57   1
  -2 -12  -8 4743.61 1211.00   1
   2  12   8 4595.24 1642.81   1
   2  12   8 3253.32 1097.10   1
  -2  12  -8 4675.97 1162.12   1
   2 -12   9  414.14 492.472   1
  -2 -12  -9 -600.92 584.115   1
  -2 -12  -9 -618.37 758.236   1
   2  12   9  349.99 610.953   1
   2  12   9  492.47 965.524   1
  -2  12  -9  943.70 670.303   1
   2 -12  10 -741.87 609.207   1
  -2 -12 -10   81.45 565.568   1
  -2 -12 -10 -393.41 737.507   1
   2  12  10 -768.93 671.612   1
   2  12  10  201.94 968.360   1
  -2  12 -10 -121.32 886.754   1
   2 -12  11  343.88 565.131   1
  -2 -12 -11 -354.57 663.102   1
   2  12  11  120.99 997.381   1
  -2  12 -11 1080.95 876.717   1
   2 -12  12  333.62 526.292   1
  -2 -12 -12  207.00 668.993   1
   2  12  12 -683.83 970.760   1
  -2  12 -12  -14.59 762.382   1
   2 -14 -11  -34.52 624.699   1
  -2 -14  11  -73.36 583.460   1
   2  14 -11 -194.06 623.608   1
   2  14 -11  505.56 679.467   1
   2 -14 -10  479.60 710.015   1
   2 -14 -10  663.10 523.019   1
  -2 -14  10  521.06 552.912   1
  -2 -14  10  921.88 841.806   1
  -2 -14  10  311.15 795.112   1
   2  14 -10  554.88 697.359   1
   2  14 -10 -290.86 656.774   1
   2  14 -10   26.25 842.897   1
  -2  14  10  -54.31 558.149   1
  -2  14  10  452.11 857.734   1
   2 -14  -9  969.67 548.330   1
   2 -14  -9 1025.09 783.547   1
  -2 -14   9  -81.32 713.287   1
  -2 -14   9 -125.77 851.843   1
  -2 -14   9 -466.07 494.654   1
   2  14  -9  -66.33 711.978   1
   2  14  -9 -751.47 639.755   1
   2  14  -9 -161.25 938.249   1
  -2  14   9  139.08 539.602   1
  -2  14   9  493.13 826.314   1
   2 -14  -8 1119.79 754.309   1
   2 -14  -8   -3.30 469.561   1
  -2 -14   8 1773.29 1236.74   1
  -2 -14   8  504.69 468.906   1
  -2 -14   8  728.56 901.810   1
   2  14  -8  938.47 1017.02   1
   2  14  -8 1120.01 589.133   1
   2  14  -8 -672.92 991.053   1
  -2  14   8 1050.62 716.560   1
  -2  14   8  264.89 776.565   1
   2 -14  -7  523.02 718.524   1
   2 -14  -7  419.38 491.163   1
  -2 -14   7  812.57 1006.33   1
  -2 -14   7  528.47 841.588   1
  -2 -14   7  426.14 440.322   1
   2  14  -7 -615.10 894.828   1
   2  14  -7  -12.54 461.924   1
   2  14  -7 -243.73 892.428   1
  -2  14   7  -50.32 542.003   1
  -2  14   7 1454.72 820.422   1
   2 -14  -6   88.02 437.486   1
   2 -14  -6 -314.86 568.186   1
  -2 -14   6 -292.38 1164.08   1
  -2 -14   6 -1199.9 885.227   1
  -2 -14   6 -138.14 426.358   1
   2  14  -6  262.49 841.369   1
   2  14  -6  531.53 501.200   1
   2  14  -6 -1317.3 864.062   1
  -2  14   6  184.31 558.804   1
  -2  14   6 -108.03 574.514   1
   2 -14  -5 1176.74 542.439   1
   2 -14  -5  734.02 499.672   1
  -2 -14   5  763.69 969.233   1
  -2 -14   5 1108.44 421.557   1
  -2 -14   5  -63.06 829.587   1
   2  14  -5  627.75 803.621   1
   2  14  -5  239.58 449.050   1
   2  14  -5 -939.78 884.354   1
  -2  14   5  513.64 552.040   1
  -2  14   5  809.95 479.816   1
   2 -14  -4  822.82 506.000   1
   2 -14  -4 1966.61 819.113   1
  -2 -14   4 2061.31 542.439   1
  -2 -14   4 1923.41 872.572   1
  -2 -14   4  356.75 917.739   1
   2  14  -4 1607.46 906.174   1
   2  14  -4  679.90 487.453   1
   2  14  -4 1165.39 754.527   1
  -2  14   4 1186.99 703.469   1
  -2  14   4 1643.68 532.620   1
   2 -14  -3  505.35 402.356  -1
   2 -14  -3  535.67 500.327  -1
   2 -14  -3 1953.09 619.681  -1
  -2 -14   3 1251.58 998.253  -1
  -2 -14   3  425.49 576.478  -1
  -2 -14   3 1005.89 421.776  -1
  -2 -14   3 1689.50 739.689  -1
   2  14  -3 1909.45 1003.93  -1
   2  14  -3 1224.09 541.566  -1
   2  14  -3  163.78 602.661  -1
   2  14  -3 -120.03 508.400  -1
  -2  14   3 3445.34 1315.73  -1
   2 -14  -2 3253.32 758.018   1
   2 -14  -2 3318.78 1210.12   1
   2 -14  -2 2751.47 748.635   1
  -2 -14   2 1616.41 600.043   1
  -2 -14   2 1987.78 473.925   1
  -2 -14   2 1094.70 850.534   1
  -2 -14   2 3844.64 895.701   1
   2  14  -2 1572.99 440.322   1
   2  14  -2 2864.93 763.691   1
   2  14  -2 2021.16 578.878   1
   2  14  -2 3855.55 1554.00   1
  -2  14   2 3443.16 1313.99   1
  -2  14   2 3491.16 998.472   1
  -2  14   2 2934.76 637.137   1
   2 -14  -1   63.82 431.376   1
   2 -14  -1 1025.96 558.367   1
   2 -14  -1  384.68 467.379   1
  -2 -14   1  208.95 413.048   1
  -2 -14   1  462.58 212.175   1
  -2 -14   1  299.59 785.074   1
  -2 -14   1   53.09 358.935   1
   2  14  -1  124.87 178.093   1
   2  14  -1  541.13 439.450   1
   2  14  -1   98.78 373.118   1
   2  14  -1 -346.06 796.857   1
  -2  14   1  371.37 591.097   1
  -2  14   1  117.28 559.677   1
  -2  14   1  337.12 322.714   1
   2 -14   0  910.32 672.048   1
   2 -14   0  764.13 327.951   1
   2 -14   0 1186.78 474.798   1
  -2 -14   0  563.17 156.448   1
  -2 -14   0  779.18 644.773   1
  -2 -14   0 1308.31 387.301   1
  -2 -14   0  119.31 427.885   1
   2  14   0 1655.03 581.496   1
   2  14   0  -61.66 639.755   1
   2  14   0  477.20 139.908   1
   2  14   0 1747.33 446.868   1
  -2  14   0  102.55 615.317   1
  -2  14   0 1175.87 458.215   1
  -2  14   0  866.24 312.022   1
   2 -14   1  687.54 737.726   1
   2 -14   1 -769.80 421.121   1
   2 -14   1 1359.15 434.431   1
  -2 -14  -1  964.21 177.198   1
  -2 -14  -1  739.91 556.622   1
  -2 -14  -1  538.07 427.012   1
  -2 -14  -1 1053.02 518.655   1
   2  14   1  921.23 614.008   1
   2  14   1  783.33 639.755   1
   2  14   1  971.20 175.933   1
   2  14   1  641.50 391.664   1
  -2  14  -1  640.41 761.073   1
  -2  14  -1  179.51 377.045   1
  -2  14  -1  725.72 417.194   1
   2 -14   2  586.08 760.636   1
   2 -14   2 1173.25 675.321   1
   2 -14   2  346.72 317.696   1
  -2 -14  -2  269.04 287.584   1
  -2 -14  -2   55.62 493.999   1
  -2 -14  -2  551.39 454.069   1
  -2 -14  -2  734.23 572.768   1
   2  14   2  315.30 741.871   1
   2  14   2  360.24 653.065   1
   2  14   2  317.26 173.511   1
   2  14   2  735.33 401.047   1
  -2  14  -2  176.78 738.598   1
  -2  14  -2  932.14 464.542   1
  -2  14  -2  696.92 559.458   1
   2 -14   3   22.10 784.856  -1
   2 -14   3  372.46 660.920  -1
   2 -14   3 1726.16 480.253  -1
  -2 -14  -3 -374.43 888.936  -1
  -2 -14  -3 1315.73 711.542  -1
  -2 -14  -3  159.35 486.144  -1
  -2 -14  -3 -109.47 476.980  -1
   2  14   3  483.74 212.917  -1
   2  14   3  346.28 765.437  -1
   2  14   3 1092.51 770.455  -1
   2  14   3  635.61 430.940  -1
  -2  14  -3 1057.38 810.822  -1
  -2  14  -3  902.46 445.559  -1
  -2  14  -3 -298.49 579.751  -1
   2 -14   4 1322.93 968.797   1
   2 -14   4 -184.75 762.600   1
   2 -14   4 -454.07 349.116   1
  -2 -14  -4  181.32 509.491   1
  -2 -14  -4  788.35 500.981   1
  -2 -14  -4  648.92 588.479   1
   2  14   4  450.14 652.629   1
   2  14   4  919.48 903.556   1
   2  14   4  376.17 473.925   1
  -2  14  -4 -225.18 709.360   1
  -2  14  -4  -12.97 773.946   1
  -2  14  -4  -73.05 367.008   1
   2 -14   5  221.25 802.312   1
   2 -14   5 1483.96 1234.56   1
   2 -14   5  658.30 401.265   1
  -2 -14  -5  986.91 597.643   1
  -2 -14  -5 1747.33 627.318   1
   2  14   5  946.54 670.521   1
   2  14   5  480.69 538.511   1
  -2  14  -5  628.63 825.659   1
  -2  14  -5 1308.53 892.864   1
  -2  14  -5 1305.04 488.544   1
   2 -14   6  500.98 774.819  -1
   2 -14   6 1612.70 1108.44  -1
   2 -14   6  571.90 431.158  -1
  -2 -14  -6  179.31 392.755  -1
  -2 -14  -6  -55.05 546.366  -1
   2  14   6  762.16 612.698  -1
   2  14   6  122.30 536.111  -1
  -2  14  -6  599.61 878.899  -1
  -2  14  -6 1012.22 950.686  -1
  -2  14  -6  241.98 433.995  -1
   2 -14   7 -817.15 922.539   1
   2 -14   7 1027.49 1092.51   1
   2 -14   7 1011.13 499.672   1
  -2 -14  -7 1278.20 652.410   1
  -2 -14  -7  918.83 642.155   1
   2  14   7  731.83 596.988   1
   2  14   7 1103.86 722.015   1
  -2  14  -7  619.24 934.758   1
  -2  14  -7   19.21 1158.19   1
  -2  14  -7 1112.59 566.441   1
   2 -14   8 -636.70 845.733   1
   2 -14   8  663.54 928.430   1
   2 -14   8 -424.39 507.745   1
  -2 -14  -8   -4.99 656.338   1
  -2 -14  -8  723.32 527.383   1
   2  14   8 1195.72 698.014   1
   2  14   8  707.83 671.394   1
  -2  14  -8 1378.35 951.123   1
  -2  14  -8  522.15 588.915   1
  -2  14  -8  423.52 1180.67   1
   2 -14   9  182.09 712.633   1
   2 -14   9  513.64 551.821   1
  -2 -14  -9 1244.38 601.570   1
  -2 -14  -9   96.49 723.979   1
   2  14   9 1777.00 805.803   1
   2  14   9 1501.42 923.848   1
  -2  14  -9  212.37 721.143   1
  -2  14  -9 1200.96 653.283   1
  -2  14  -9 1433.12 992.580   1
   2 -14  10  112.57 607.898   1
  -2 -14 -10  195.11 498.799   1
  -2 -14 -10 -756.05 722.888   1
   2  14  10 -1190.5 720.488   1
   2  14  10 -220.82 883.263   1
  -2  14 -10   74.06 638.228   1
   2 -14  11  -29.24 607.462   1
  -2 -14 -11  383.59 662.884   1
   2  14  11  -26.84 674.667   1
  -2  14 -11 -336.46 677.503   1
   2 -16  -9  562.29 509.491   1
  -2 -16   9 -472.83 760.636   1
  -2 -16   9  132.38 552.694   1
   2  16  -9  269.91 620.117   1
   2  16  -9 -150.32 551.385   1
  -2  16   9  637.14 642.155   1
   2 -16  -8  -69.39 466.506   1
  -2 -16   8 -557.93 764.346   1
  -2 -16   8  -10.34 549.203   1
   2  16  -8 -386.86 631.900   1
   2  16  -8  707.83 568.841   1
  -2  16   8 -698.67 612.698   1
   2 -16  -7  661.36 683.394   1
   2 -16  -7  492.69 484.617   1
  -2 -16   7  -24.18 775.037   1
  -2 -16   7  422.87 798.821   1
  -2 -16   7 -668.34 567.313   1
   2  16  -7  -48.31 571.459   1
   2  16  -7 -148.20 525.856   1
   2  16  -7 1626.44 890.246   1
  -2  16   7 -219.94 558.149   1
  -2  16   7 1286.71 754.090   1
   2 -16  -6  741.22 578.878   1
   2 -16  -6   56.86 399.738   1
  -2 -16   6 -509.49 503.163   1
  -2 -16   6 1045.82 862.971   1
  -2 -16   6 1118.92 790.748   1
   2  16  -6  833.95 519.965   1
   2  16  -6 -288.89 581.060   1
   2  16  -6  342.13 758.454   1
  -2  16   6 1535.67 730.743   1
  -2  16   6  272.09 568.623   1
   2 -16  -5  265.33 459.742   1
   2 -16  -5  614.88 562.731   1
  -2 -16   5 -178.31 839.842   1
  -2 -16   5 1098.41 842.024   1
  -2 -16   5  399.30 527.165   1
   2  16  -5  574.73 697.795   1
   2  16  -5  230.85 651.101   1
   2  16  -5  552.04 801.657   1
  -2  16   5  588.70 604.407   1
  -2  16   5 -243.94 512.546   1
   2 -16  -4  354.13 475.016   1
   2 -16  -4  436.39 456.905   1
   2 -16  -4  861.01 583.242   1
  -2 -16   4 -327.51 699.105   1
  -2 -16   4 1466.07 1091.21   1
  -2 -16   4 -420.47 440.759   1
   2  16  -4  834.39 667.030   1
   2  16  -4  953.74 839.624   1
   2  16  -4 1128.74 748.854   1
  -2  16   4  408.47 611.171   1
  -2  16   4  502.07 742.962   1
  -2  16   4  194.22 463.451   1
   2 -16  -3  385.99 499.236  -1
   2 -16  -3  864.28 537.420  -1
   2 -16  -3 -538.95 569.277  -1
  -2 -16   3  956.36 878.463  -1
  -2 -16   3    5.67 425.049  -1
  -2 -16   3 -202.14 873.226  -1
  -2 -16   3  606.37 413.921  -1
   2  16  -3  838.53 865.589  -1
   2  16  -3 -304.60 478.071  -1
   2  16  -3 -313.55 513.855  -1
   2  16  -3  805.37 815.404  -1
  -2  16   3 -490.07 614.662  -1
  -2  16   3  510.80 416.539  -1
  -2  16   3  552.48 725.725  -1
   2 -16  -2  461.05 445.559   1
   2 -16  -2  375.52 469.343   1
   2 -16  -2 1033.82 630.809   1
  -2 -16   2  489.42 572.332   1
  -2 -16   2  313.99 344.752   1
  -2 -16   2 -135.76 393.846   1
  -2 -16   2  580.41 824.786   1
   2  16  -2 -163.63 315.732   1
   2  16  -2  182.85 701.505   1
   2  16  -2   55.29 488.544   1
   2  16  -2  612.04 565.131   1
  -2  16   2 -1111.9 728.125   1
  -2  16   2  788.35 406.502   1
  -2  16   2 -331.22 717.651   1
   2 -16  -1  782.67 537.639   1
   2 -16  -1  990.18 445.559   1
   2 -16  -1  313.99 574.950   1
  -2 -16   1 2367.44 660.047   1
  -2 -16   1  694.96 634.518   1
  -2 -16   1  -61.99 416.103   1
   2  16  -1  886.54 722.234   1
   2  16  -1  651.32 466.506   1
   2  16  -1  539.82 426.576   1
  -2  16   1  251.80 629.063   1
  -2  16   1  881.74 593.715   1
  -2  16   1 1316.60 412.393   1
   2 -16   0 1228.23 683.831   1
   2 -16   0  190.62 311.586   1
   2 -16   0  689.72 494.217   1
  -2 -16   0  484.83 337.988   1
  -2 -16   0  313.99 160.397   1
  -2 -16   0   -7.59 479.816   1
  -2 -16   0 2158.63 920.575   1
   2  16   0   59.26 118.219   1
   2  16   0 1102.55 752.345   1
   2  16   0 -132.75 513.855   1
   2  16   0 -266.20 320.096   1
  -2  16   0  275.15 697.795   1
  -2  16   0  325.33 257.691   1
  -2  16   0  337.33 410.866   1
   2 -16   1 1055.42 727.470   1
   2 -16   1  243.51 492.690   1
   2 -16   1 1280.60 456.687   1
  -2 -16  -1  240.02 385.555   1
  -2 -16  -1 1046.91 592.624   1
  -2 -16  -1  347.81 576.260   1
   2  16   1  706.31 650.010   1
   2  16   1  815.62 645.210   1
   2  16   1  559.24 378.354   1
  -2  16  -1   -3.84 667.902   1
  -2  16  -1  699.98 415.884   1
  -2  16  -1 1079.20 455.596   1
   2 -16   2 5256.38 1187.65   1
   2 -16   2 4562.51 1717.87   1
   2 -16   2 3768.27 884.573   1
  -2 -16  -2 4907.26 1037.09   1
  -2 -16  -2 3648.26 1008.07   1
  -2 -16  -2 2921.66 464.106   1
  -2 -16  -2 4089.02 1460.61   1
   2  16   2 4182.85 1555.75   1
   2  16   2 3576.26 511.455   1
   2  16   2 3401.70 1132.01   1
   2  16   2 4396.68 928.430   1
  -2  16  -2 3384.24 1415.23   1
  -2  16  -2 3986.47 940.431   1
   2 -16   3  653.28 858.171   1
   2 -16   3 1342.57 774.601   1
   2 -16   3  636.26 421.557   1
  -2 -16  -3  349.33 1006.11   1
  -2 -16  -3 1468.25 651.538   1
  -2 -16  -3  573.64 515.382   1
  -2 -16  -3  587.17 571.023   1
   2  16   3 1102.12 248.963   1
   2  16   3  598.95 847.697   1
   2  16   3  759.11 493.563   1
   2  16   3  700.41 711.106   1
  -2  16  -3  478.94 875.626   1
  -2  16  -3 1447.09 810.385   1
  -2  16  -3  936.72 516.473   1
   2 -16   4 -1056.7 802.967   1
   2 -16   4 -671.83 909.883   1
   2 -16   4  262.27 514.073   1
  -2 -16  -4  426.79 474.579   1
  -2 -16  -4 -683.61 627.318   1
  -2 -16  -4 -265.11 696.268   1
  -2 -16  -4  376.39 460.397   1
   2  16   4  972.51 686.667   1
   2  16   4 1032.07 977.743   1
   2  16   4  258.13 396.247   1
  -2  16  -4  185.71 857.734   1
  -2  16  -4  402.36 727.034   1
  -2  16  -4 -447.96 539.384   1
   2 -16   5  145.49 756.272   1
   2 -16   5  930.18 821.295   1
   2 -16   5  665.72 497.708   1
  -2 -16  -5  667.47 530.220   1
  -2 -16  -5  351.73 465.852   1
  -2 -16  -5 -284.31 608.116   1
   2  16   5 1059.35 670.084   1
   2  16   5 -713.51 1026.84   1
   2  16   5 1238.93 540.257   1
  -2  16  -5  157.87 699.977   1
  -2  16  -5  407.59 423.739   1
  -2  16  -5 2005.67 921.012   1
   2 -16   6   -6.74 775.692   1
   2 -16   6   -7.40 826.532   1
   2 -16   6  211.91 509.055   1
  -2 -16  -6  653.07 598.079   1
  -2 -16  -6 -247.00 448.614   1
   2  16   6 -587.82 607.680   1
   2  16   6 1287.58 612.044   1
  -2  16  -6  520.18 593.497   1
  -2  16  -6  142.55 448.832   1
  -2  16  -6  358.93 893.737   1
   2 -16   7 -986.91 743.399   1
   2 -16   7 -1240.9 868.644   1
   2 -16   7   86.43 527.602   1
  -2 -16  -7   32.16 401.920   1
  -2 -16  -7 -944.58 647.828   1
   2  16   7 1428.98 753.218   1
   2  16   7 -320.10 610.298   1
  -2  16  -7 -147.94 643.901   1
  -2  16  -7 1228.67 958.978   1
  -2  16  -7  793.15 507.091   1
   2 -16   8  179.79 697.359   1
   2 -16   8  286.71 515.164   1
  -2 -16  -8  581.71 545.057   1
   2  16   8  971.42 732.271   1
  -2  16  -8  -35.85 609.207   1
  -2  16  -8  240.45 532.838   1
   2 -18  -5 1047.78 592.624  -1
  -2 -18   5  530.00 715.688  -1
  -2 -18   5 1277.55 536.984  -1
   2  18  -5  295.88 618.372  -1
   2  18  -5 1027.27 624.699  -1
  -2  18   5 1735.11 843.551  -1
   2 -18  -4 1041.02 565.350   1
   2 -18  -4 -643.46 667.902   1
  -2 -18   4  177.18 728.998   1
  -2 -18   4   80.03 445.996   1
   2  18  -4  568.19 710.451   1
   2  18  -4  780.06 597.425   1
   2  18  -4  141.37 401.702   1
  -2  18   4 1124.59 710.233   1
  -2  18   4  316.39 752.127   1
   2 -18  -3  635.39 498.581   1
   2 -18  -3  137.38 637.573   1
  -2 -18   3  177.31 309.622   1
  -2 -18   3  462.14 720.706   1
  -2 -18   3 1068.08 481.344   1
   2  18  -3  493.56 648.701   1
   2  18  -3   36.61 493.126   1
   2  18  -3   89.70 334.933   1
  -2  18   3  529.13 670.303   1
  -2  18   3 -178.57 704.996   1
   2 -18  -2 1013.96 611.607   1
   2 -18  -2   66.68 709.796   1
  -2 -18   2  554.44 219.507   1
  -2 -18   2 1710.45 959.414   1
  -2 -18   2 1455.38 533.493   1
   2  18  -2  -34.98 679.249   1
   2  18  -2 1500.11 593.279   1
   2  18  -2  254.64 283.220   1
  -2  18   2 2008.94 986.253   1
  -2  18   2  574.08 736.416   1
   2 -18  -1  705.21 486.580   1
   2 -18  -1 1472.18 692.341   1
   2 -18  -1 -660.70 597.861   1
  -2 -18   1  684.05 176.805   1
  -2 -18   1  763.04 718.306   1
  -2 -18   1   32.60 450.360   1
  -2 -18   1 1458.21 554.876   1
   2  18  -1  827.19 721.361   1
   2  18  -1  116.80 477.198   1
   2  18  -1  343.01 200.829   1
   2  18  -1 -189.16 365.699   1
  -2  18   1  153.68 631.245   1
  -2  18   1   79.16 416.757   1
  -2  18   1  516.47 512.546   1
   2 -18   0  -86.47 332.969   1
   2 -18   0  869.08 659.393   1
   2 -18   0  319.66 529.783   1
  -2 -18   0   44.51 346.061   1
  -2 -18   0  154.44 131.966   1
  -2 -18   0 1348.46 744.490   1
  -2 -18   0  603.32 572.768   1
   2  18   0 -165.85 694.304   1
   2  18   0  -94.59 128.627   1
   2  18   0 -727.91 364.608   1
   2  18   0 -244.82 475.016   1
  -2  18   0 -483.53 761.727   1
  -2  18   0  104.49 361.335   1
  -2  18   0   21.97 310.277   1
  -2  18   0  -32.93 124.263   1
   2 -18   1 1208.38 542.221   1
   2 -18   1 2068.29 914.247   1
   2 -18   1  904.43 475.234   1
  -2 -18  -1 1983.20 284.311   1
  -2 -18  -1 3170.41 1187.43   1
  -2 -18  -1 1837.88 605.280   1
  -2 -18  -1 1419.37 664.630   1
   2  18   1 1626.44 868.426   1
   2  18   1 1656.12 702.159   1
   2  18   1 1806.89 273.183   1
   2  18   1 1392.10 506.436   1
  -2  18  -1 1351.95 794.893   1
  -2  18  -1 1654.81 527.165   1
  -2  18  -1 1097.53 469.125   1
   2 -18   2   83.11 664.411   1
   2 -18   2 1053.89 466.943   1
  -2 -18  -2  212.63 141.152   1
  -2 -18  -2  883.26 566.222   1
  -2 -18  -2  234.34 580.405   1
   2  18   2 -147.98 667.466   1
   2  18   2  350.64 689.722   1
   2  18   2  248.96 129.238   1
  -2  18  -2  716.12 755.400   1
  -2  18  -2 1250.27 490.508   1
   2 -18   3  307.66 648.919   1
   2 -18   3 1063.93 488.981   1
  -2 -18  -3  522.58 747.108   1
  -2 -18  -3  647.39 485.926   1
  -2 -18  -3  791.62 600.916   1
   2  18   3 1155.36 715.688   1
   2  18   3  561.42 794.021   1
   2  18   3  562.73 177.613   1
  -2  18  -3  293.48 666.157   1
  -2  18  -3 1095.13 559.895   1
   2 -18   4 -399.96 643.682   1
   2 -18   4 -161.60 470.434   1
  -2 -18  -4 -163.32 601.789   1
  -2 -18  -4  950.47 547.239   1
  -2 -18  -4  989.31 644.773   1
   2  18   4 1088.37 722.452   1
   2  18   4  170.96 786.602   1
   2  18   4  147.55 166.550   1
  -2  18  -4  694.30 666.593   1
  -2  18  -4  693.65 515.601   1
   3   1  -3 8343.87 1819.98   1
   3  -1  -2  51538. 6988.86   1
   3  -1  -2  55357.  11702.   1
  -3  -1   2  56993. 7719.83   1
   3   1  -2  52760. 7154.69   1
   3   1  -2  70085.  14807.   1
  -3   1   2  55706. 7556.18   1
  -3   1   2  50862.  10757.   1
   3  -1  -1 1522.15 304.167   1
   3  -1  -1  -18.33 576.914   1
   3  -1  -1  11940. 2533.27   1
  -3  -1   1 5718.96 1993.89   1
  -3  -1   1 1913.37 349.771   1
   3   1  -1 3320.97 1235.22   1
   3   1  -1  949.81 272.747   1
  -3   1   1  608.55 547.676   1
   3  -1   0  50382. 9039.92   1
   3  -1   0  49967. 6759.76   1
   3  -1   0  60986.  20404.   1
   3  -1   0  38905. 8217.32   1
  -3  -1   0  49924. 6755.39   1
  -3  -1   0  46040.  15413.   1
   3   1   0  37726.  12636.   1
   3   1   0  44643. 9430.49   1
   3   1   0  38926. 5271.65   1
   3   1   0  44840. 8060.21   1
  -3   1   0  49574.  16587.   1
  -3   1   0  41981. 7534.36   1
  -3   1   0  43116. 5841.15   1
  -3   1   0  48200.  10179.   1
   3  -1   1  15680. 2884.57   1
  -3  -1  -1  16053. 2205.98   1
  -3  -1  -1  19577. 3539.16   1
   3   1   1  17006. 2328.17   1
   3   1   1  13146. 2795.11   1
   3   1   1  14554. 2651.10   1
  -3   1  -1  13945. 2020.51   1
  -3  -1  -2  15920. 5358.93   1
  -3  -1  -2 1274.27 1431.16   1
   3   1   2  13587. 4586.51   1
  -3   1  -2 -629.94 1455.38   1
  -3  -1  -3 1856.64 954.614   1
   3   1   3 3829.37 1351.95   1
  -3  -1  -4  84050.  15171.   1
   3   1   4  67161.  12184.   1
  -3  -3   5  12703. 2744.92   1
   3   3  -5  15029. 3222.78   1
  -3  -3   4 9227.57 2015.93   1
   3   3  -4 8926.46 1938.03   1
  -3  -3   3 7379.44 1611.82   1
   3   3  -3 9142.47 1969.89   1
   3  -3  -2 7591.09 1087.50   1
  -3  -3   2 7514.72 2672.92   1
  -3  -3   2 6838.31 1339.73   1
  -3  -3   2  16024. 3397.33   1
  -3  -3   2 5817.14 862.535   1
   3   3  -2  13607. 4654.15   1
   3   3  -2  12832. 2725.29   1
   3   3  -2 6873.22 1330.79   1
  -3   3   2 6877.58 998.472   1
   3  -3  -1  10748. 3613.35   1
   3  -3  -1 8620.98 1191.79   1
  -3  -3   1  13899. 4689.06   1
  -3  -3   1 9397.76 1304.60   1
   3   3  -1 8640.62 1200.52   1
  -3   3   1  15422. 5175.64   1
  -3   3   1 8134.40 1127.21   1
   3  -3   0 341697.  61270.   1
   3  -3   0 372899. 124722.   1
   3  -3   0 280602.  37901.   1
  -3  -3   0 519746. 173903.   1
  -3  -3   0 343225.  72463.   1
  -3  -3   0 277329.  37486.   1
  -3  -3   0 337988.  60593.   1
   3   3   0 455814. 152498.   1
   3   3   0 301767.  40759.   1
   3   3   0 386864.  69343.   1
   3   3   0 301112.  63561.   1
  -3   3   0 466724. 156186.   1
  -3   3   0 301985.  40803.   1
  -3   3   0 371154.  66594.   1
  -3  -3  -1  31442. 5660.04  -1
  -3  -3  -1  41981.  14061.  -1
  -3  -3  -1  32402. 6853.58  -1
  -3  -3  -1  34410. 4665.06  -1
   3   3   1  52586.  17619.  -1
   3   3   1  26446. 3589.35  -1
   3   3   1  30875. 6532.83  -1
   3   3   1  32926. 5924.06  -1
  -3  -3  -2  41414. 7451.44   1
   3   3   2  46694. 8396.24   1
  -3  -3  -3 2893.30 835.478   1
   3   3   3  995.64 637.355   1
  -3  -3  -4  921.88 815.186   1
   3   3   4 1115.86 982.980   1
  -3  -3  -5 2537.64 1163.65   1
   3   3   5 1607.68 1431.16   1
  -3  -5   9 1266.20 709.142   1
   3   5  -9 2243.07 864.498   1
  -3  -5   8 1444.25 758.018   1
   3   5  -8 2598.73 920.139   1
  -3  -5   7 4121.75 1095.57   1
   3   5  -7 2941.30 828.496   1
  -3  -5   6 2061.53 665.720   1
   3   5  -6 3231.50 820.204   1
  -3  -5   5  18017. 3626.44   1
  -3  -5   5  36112. 7650.00   1
   3   5  -5  22802. 4571.24   1
   3   5  -5  27209. 5773.50   1
  -3  -5   4  43618. 7916.20   1
  -3  -5   4  26729. 9055.19   1
  -3  -5   4  41087. 8692.99   1
   3   5  -4  20096. 6812.12   1
   3   5  -4  56295.  11898.   1
   3   5  -4  38315. 6973.59   1
   3  -5  -3  28147. 5190.92   1
  -3  -5   3  21484. 7298.71   1
  -3  -5   3  34977. 4795.98   1
  -3  -5   3  40977. 7401.26   1
  -3  -5   3  32861. 6949.59   1
   3   5  -3  32140.  10825.   1
   3   5  -3  38097. 5219.28   1
   3   5  -3  32271. 6825.22   1
   3   5  -3  43050. 7772.19   1
  -3   5   3  37683. 6945.23   1
   3  -5  -2 1378.35 558.804   1
   3  -5  -2 1162.56 553.131   1
  -3  -5   2 1101.02 348.025   1
  -3  -5   2 6982.32 1503.60   1
  -3  -5   2 1595.90 1024.22   1
  -3  -5   2 1773.07 550.076   1
   3   5  -2 7401.26 1593.71   1
   3   5  -2 2668.55 1208.16   1
   3   5  -2 1346.28 457.342   1
   3   5  -2 2065.24 415.884   1
  -3   5   2 2472.18 966.397   1
  -3   5   2 2622.73 789.438   1
  -3   5   2 1379.88 445.996   1
   3  -5  -1  54244. 9735.97   1
   3  -5  -1  49487. 6696.48   1
   3  -5  -1  42832.  14340.   1
  -3  -5   1  56950.  19084.   1
  -3  -5   1  48593. 6576.47   1
  -3  -5   1  46760. 9884.34   1
   3   5  -1  32577. 6888.49   1
   3   5  -1  42003.  14091.   1
   3   5  -1  61706.  11087.   1
   3   5  -1  53960. 7303.07   1
  -3   5   1  36679.  12285.   1
  -3   5   1  55051. 9884.34   1
  -3   5   1  53240. 7202.70   1
   3  -5   0 276893.  49640.  -1
   3  -5   0 217325.  29369.  -1
   3  -5   0 265764.  88959.  -1
   3  -5   0 250054.  52826.  -1
  -3  -5   0 228889.  30940.  -1
  -3  -5   0 291730.  52280.  -1
  -3  -5   0 240672.  80559.  -1
  -3  -5   0 214837.  45363.  -1
   3   5   0 241545.  32621.  -1
   3   5   0 208291.  43989.  -1
   3   5   0 288457.  51713.  -1
   3   5   0 273183.  91447.  -1
  -3   5   0 265110.  88719.  -1
  -3   5   0 203491.  42963.  -1
  -3   5   0 278420.  49924.  -1
  -3   5   0 215710.  29151.  -1
   3  -5   1 571677. 191272.   1
   3  -5   1 672048. 120489.   1
   3  -5   1 416103.  87890.   1
  -3  -5  -1 385119.  52018.   1
  -3  -5  -1 528911. 176980.   1
  -3  -5  -1 508182.  91076.   1
  -3  -5  -1 456251.  96334.   1
   3   5   1 478507. 101025.   1
   3   5   1 568623. 190246.   1
   3   5   1 328169.  44338.   1
   3   5   1 504036.  90356.   1
  -3   5  -1 622954. 208422.   1
  -3   5  -1 504691. 106568.   1
  -3   5  -1 676630. 121296.   1
   3  -5   2 4377.04 1595.68   1
   3  -5   2 1292.82 479.380   1
  -3  -5  -2 5810.60 1137.25   1
  -3  -5  -2 2415.45 1036.66   1
  -3  -5  -2 2262.71 606.589   1
   3   5   2 2264.89 965.306   1
   3   5   2 1127.64 476.980   1
   3   5   2 4713.07 949.377   1
  -3   5  -2 2677.28 1137.46   1
  -3   5  -2 1372.46 465.852   1
  -3  -5  -3  113.31 3942.83   1
  -3  -5  -3 9941.08 3392.97   1
  -3  -5  -3 4084.66 862.971   1
   3   5   3  14067. 4765.43   1
   3   5   3 4065.02 857.298   1
   3   5   3 3185.68 1572.11   1
  -3  -5  -4  16672. 5651.31   1
  -3  -5  -4  32642. 5921.88   1
   3   5   4  15494. 5258.56   1
   3   5   4  31180. 5670.95   1
  -3  -5  -5  32555.  10960.   1
   3   5   5  45691.  15339.   1
  -3  -5  -6 1869.95 1112.15   1
   3   5   6 -497.93 1213.18   1
  -3  -5  -7 7628.18 1955.49   1
   3   5   7 4113.02 2163.21   1
  -3  -5  -8 1545.06 1336.02   1
   3   5   8 2086.62 2354.35   1
  -3  -5  -9  882.83 1058.91   1
   3   5   9  624.48 1773.95   1
  -3  -7  11 1069.82 620.990   1
   3   7 -11  639.97 869.735   1
  -3  -7  10 1465.63 722.015   1
   3   7 -10 1022.69 864.062   1
  -3  -7   9   71.92 547.021   1
   3   7  -9  434.65 666.375   1
  -3  -7   8 3715.90 973.161   1
   3   7  -8 5081.82 1219.51   1
  -3  -7   7 3314.42 833.514   1
   3   7  -7 2048.00 630.591   1
   3  -7  -6 9936.71 2236.52   1
  -3  -7   6  14375. 3131.13   1
  -3  -7   6  19452. 4139.21   1
   3   7  -6  18968. 4038.83   1
   3  -7  -5  33166. 6174.99   1
  -3  -7   5  29369. 5400.39   1
  -3  -7   5  33821.  11451.   1
  -3  -7   5  42003. 8887.18   1
   3   7  -5  40868.  13766.   1
   3   7  -5  34584. 7322.71   1
  -3   7   5  23893. 4918.17   1
   3  -7  -4  10142. 3473.70   1
   3  -7  -4  11318. 2201.61   1
  -3  -7   4 8983.19 3310.06   1
  -3  -7   4  13155. 2524.54   1
  -3  -7   4  14200. 3022.03   1
   3   7  -4  12119. 2585.64   1
  -3   7   4  12062. 4130.48   1
  -3   7   4 8435.51 1962.47   1
   3  -7  -3  410.21 554.440   1
   3  -7  -3 1452.76 733.798   1
  -3  -7   3 1045.38 1159.50   1
  -3  -7   3  942.61 610.516   1
  -3  -7   3 1018.98 353.916   1
  -3  -7   3 1206.63 572.332   1
   3   7  -3  890.25 955.050   1
   3   7  -3 1930.39 649.356   1
   3   7  -3  674.01 326.642   1
   3   7  -3 1173.90 747.108   1
  -3   7   3  188.09 574.296   1
  -3   7   3 1284.31 639.319   1
   3  -7  -2  32686. 5882.60   1
   3  -7  -2  51996.  17408.   1
   3  -7  -2  30809. 4211.21   1
  -3  -7   2  43923.  14752.   1
  -3  -7   2  28344. 6002.61   1
  -3  -7   2  27515. 3746.45   1
  -3  -7   2  33930. 6126.98   1
   3   7  -2  34432.  11578.   1
   3   7  -2  26555. 3613.35   1
   3   7  -2  32490. 5878.24   1
   3   7  -2  37246. 7883.47   1
  -3   7   2  41436.  13882.   1
  -3   7   2  22496. 3083.13   1
  -3   7   2  25267. 4555.96   1
   3  -7  -1  27187. 9107.56   1
   3  -7  -1  21021. 3792.27   1
   3  -7  -1  18270. 3873.00   1
   3  -7  -1  20447. 2773.29   1
  -3  -7   1  26991. 4881.08   1
  -3  -7   1  21379. 4534.14   1
  -3  -7   1  19852. 2699.10   1
  -3  -7   1  31770.  10672.   1
   3   7  -1  22671. 7639.09   1
   3   7  -1  22845. 3102.77   1
   3   7  -1  22693. 4115.20   1
   3   7  -1  24918. 5276.01   1
  -3   7   1  32424.  10868.   1
  -3   7   1  20556. 4357.40   1
  -3   7   1  27253. 4902.90   1
  -3   7   1  22627. 3065.67   1
   3  -7   0 1912.72 408.029   1
   3  -7   0 1163.21 548.767   1
   3  -7   0 2459.09 570.368   1
  -3  -7   0 3883.91 895.264   1
  -3  -7   0 2332.53 968.797   1
   3   7   0 2236.52 346.061   1
   3   7   0 3519.53 1328.39   1
   3   7   0 3709.36 842.242   1
   3   7   0 1969.67 477.852   1
  -3   7   0 2771.11 1035.13   1
  -3   7   0 2524.54 573.423   1
  -3   7   0 2705.65 543.312   1
  -3   7   0 2489.63 353.916   1
   3  -7   1  31290.  10506.   1
   3  -7   1  28322. 5101.46   1
   3  -7   1  29348. 4272.31   1
   3  -7   1  17761. 3759.54   1
  -3  -7  -1  23042. 3124.59   1
  -3  -7  -1  26882. 4850.53   1
  -3  -7  -1  23631. 5014.18   1
  -3  -7  -1  29478. 9888.71   1
   3   7   1  27929. 9371.58   1
   3   7   1  19721. 2677.28   1
   3   7   1  22343. 4750.16   1
   3   7   1  23085. 4169.75   1
  -3   7  -1  36526.  12256.   1
  -3   7  -1  23609. 4261.40   1
  -3   7  -1  24264. 5134.19   1
   3  -7   2  43487. 7837.65   1
   3  -7   2  36526.  12276.   1
   3  -7   2  37770. 7983.85   1
  -3  -7  -2  44425. 7996.94   1
  -3  -7  -2  28518. 9574.50   1
  -3  -7  -2  41741. 8832.63   1
   3   7   2  38599. 8175.86   1
   3   7   2  24198. 8130.04   1
   3   7   2  34017. 6129.17   1
  -3   7  -2  25136. 8466.06   1
  -3   7  -2  38337. 8103.85   1
  -3   7  -2  38381. 6925.59   1
   3  -7   3  811.04 1109.10   1
   3  -7   3 4132.66 1673.14   1
   3  -7   3  405.19 378.354   1
  -3  -7  -3 3523.89 4953.08   1
  -3  -7  -3 4381.41 1589.35   1
  -3  -7  -3 1085.97 449.705   1
   3   7   3 1322.93 975.779   1
   3   7   3 3349.33 1269.04   1
   3   7   3 1628.41 530.874   1
  -3   7  -3 3619.90 1492.25   1
  -3   7  -3  687.32 346.934   1
  -3   7  -3 -1901.8 1782.46   1
   3  -7   4  23325. 4961.81  -1
  -3  -7  -4  33231.  11161.  -1
   3   7   4  31988.  10746.  -1
  -3   7  -4  31770. 6740.12  -1
   3  -7   5  13319. 2910.75   1
  -3  -7  -5  16201. 3028.58   1
   3   7   5  11379. 2221.25   1
  -3   7  -5  12328. 2670.74   1
  -3  -7  -6  16864. 5716.77   1
   3   7   6  19365. 6548.11   1
  -3  -7  -7 7885.66 2751.47   1
  -3  -7  -7 4813.44 1241.76   1
   3   7   7 2051.49 1454.07   1
  -3  -7  -8 4765.43 1245.47   1
   3   7   8 5358.93 1894.39   1
  -3  -7  -9  489.20 1048.44   1
   3   7   9  639.97 2025.09   1
  -3  -7 -10 2076.15 1169.76  -1
   3   7  10 -526.51 1710.67  -1
  -3  -7 -11 1127.86 833.078   1
   3   7  11 -194.94 1191.36   1
  -3  -7 -12   49.79 794.021   1
  -3  -9  14 -239.36 486.362   1
   3   9 -14  920.58 1028.36   1
  -3  -9  13  593.93 598.734   1
   3   9 -13 -290.42 1013.96   1
  -3  -9  12 -506.00 617.499   1
   3   9 -12  132.07 974.906   1
  -3  -9  11 2295.44 733.580   1
   3   9 -11 1097.97 910.320   1
  -3  -9  10 3144.23 895.701  -1
   3   9 -10 2915.12 952.868  -1
  -3  -9   9  443.60 546.148   1
   3   9  -9  637.35 543.748   1
   3  -9  -8 3094.04 1486.80   1
  -3  -9   8 -1249.0 1605.72   1
  -3  -9   8 2886.75 799.039   1
   3   9  -8 4795.98 2640.19   1
   3   9  -8 1943.70 711.106   1
  -3   9   8 4030.11 1912.06   1
   3  -9  -7  898.97 1121.75   1
  -3  -9   7 1509.71 1864.93   1
  -3  -9   7 -144.21 1361.12   1
  -3  -9   7  192.06 388.173   1
   3   9  -7  221.03 416.539   1
   3   9  -7 1031.20 1322.49   1
   3   9  -7 1138.55 2528.91   1
  -3   9   7 -1118.9 1691.90   1
   3  -9  -6  18479. 6229.54   1
   3  -9  -6  13554. 2618.37   1
  -3  -9   6  15235. 5356.75   1
  -3  -9   6 8258.77 1855.77   1
  -3  -9   6  21226. 4510.14   1
   3   9  -6  27297. 5788.78   1
   3  -9  -5  31268.  10493.   1
   3  -9  -5  32271. 5862.97   1
  -3  -9   5  26795. 9142.47   1
  -3  -9   5  34541. 6288.45   1
  -3  -9   5  36701. 7767.83   1
   3   9  -5  32381.  10958.   1
   3   9  -5  34213. 7248.52   1
   3   9  -5  39079. 7113.24   1
  -3   9   5  29937.  10055.   1
  -3   9   5  49945. 9066.10   1
   3  -9  -4  23456. 4272.31   1
   3  -9  -4  28977. 9725.06   1
  -3  -9   4  23238. 7959.84   1
  -3  -9   4  20587. 4366.13   1
  -3  -9   4  19564. 3648.26   1
   3   9  -4  28453. 9633.42   1
   3   9  -4  27537. 5836.78   1
   3   9  -4  18556. 3523.89   1
  -3   9   4  25420. 8544.61   1
  -3   9   4  19793. 3632.99   1
   3  -9  -3 5865.15 1147.94   1
   3  -9  -3 2190.70 879.336   1
  -3  -9   3 5524.76 1205.54   1
  -3  -9   3 5361.11 961.814   1
  -3  -9   3 2345.62 1343.66   1
  -3  -9   3 3859.91 929.085   1
   3   9  -3 3916.64 1673.79   1
   3   9  -3 4425.04 841.369   1
   3   9  -3 4322.49 984.725   1
   3   9  -3 3462.79 878.463   1
  -3   9   3 2083.13 915.557   1
  -3   9   3 2860.57 701.068   1
   3  -9  -2 9650.87 3266.42   1
   3  -9  -2 1656.12 494.654   1
  -3  -9   2 6046.25 2201.61   1
  -3  -9   2 4660.70 1043.42   1
   3   9  -2 5771.32 2105.82   1
   3   9  -2 1793.58 648.483   1
  -3   9   2 6288.45 2181.32   1
  -3   9   2 2291.07 582.369   1
   3  -9  -1 9127.20 1674.67   1
   3  -9  -1 4662.88 1612.92   1
   3  -9  -1 5300.02 729.652   1
  -3  -9   1 6548.11 2330.35   1
  -3  -9   1 4671.61 663.102   1
  -3  -9   1 4451.23 1003.93   1
  -3  -9   1 7453.63 1437.48   1
   3   9  -1 5033.82 1114.99   1
   3   9  -1 4082.47 1604.62   1
   3   9  -1 5352.38 756.272   1
  -3   9   1 8164.95 1506.87   1
  -3   9   1 5913.15 2054.98   1
  -3   9   1 4654.15 641.719   1
  -3   9   1 8926.46 1928.43   1
   3  -9   0  13162. 2387.08   1
   3  -9   0  15889. 2160.81   1
   3  -9   0  16869. 5688.41   1
   3  -9   0  14597. 3102.77   1
  -3  -9   0  14652. 4972.72   1
  -3  -9   0  15876. 2162.34   1
  -3  -9   0  15990. 2906.39   1
  -3  -9   0  15490. 3307.87   1
   3   9   0  15086. 3216.23   1
   3   9   0  13740. 2509.27   1
   3   9   0  16212. 5502.94   1
   3   9   0  17275. 2352.17   1
  -3   9   0  14955. 2707.83   1
  -3   9   0  17587. 5941.52   1
  -3   9   0  14475. 1964.65   1
  -3   9   0  14805. 3144.23   1
   3  -9   1  17262. 5825.87   1
   3  -9   1  14722. 2692.56   1
   3  -9   1  13140. 2795.11   1
  -3  -9  -1  11196. 1533.93   1
  -3  -9  -1  17131. 5769.14   1
  -3  -9  -1  16428. 2993.67   1
  -3  -9  -1 9618.14 2087.06   1
   3   9   1  15139. 3244.60   1
   3   9   1  16339. 5518.21   1
   3   9   1  11975. 1634.95   1
   3   9   1 9781.79 1808.42   1
  -3   9  -1  19156. 6473.92   1
  -3   9  -1  13552. 2884.57   1
  -3   9  -1  14796. 2703.47   1
   3  -9   2  14560. 4992.36   1
   3  -9   2 3368.97 847.697   1
   3  -9   2 3017.67 686.013   1
  -3  -9  -2 2192.88 578.878   1
  -3  -9  -2  14469. 4889.81   1
  -3  -9  -2 3615.53 788.784   1
  -3  -9  -2 4200.30 1000.87   1
   3   9   2 2609.64 452.105   1
   3   9   2 3347.15 887.627   1
   3   9   2  11658. 3973.38   1
   3   9   2 3735.54 803.185   1
  -3   9  -2  14015. 4789.43   1
  -3   9  -2 4093.38 901.374   1
  -3   9  -2 3399.52 921.230   1
   3  -9   3 5703.68 1240.89   1
   3  -9   3 2559.46 1562.29   1
   3  -9   3 6574.29 1433.34   1
  -3  -9  -3  646.74 3868.64   1
  -3  -9  -3 2029.45 904.210   1
  -3  -9  -3 5985.16 1208.16   1
  -3  -9  -3 6371.37 1415.88   1
   3   9   3 2195.07 977.525   1
   3   9   3 4302.85 1141.83   1
   3   9   3 5664.41 973.815   1
   3   9   3 7180.88 1417.63   1
  -3   9  -3 3488.98 1646.74   1
  -3   9  -3 6539.38 1448.39   1
  -3   9  -3 3888.28 882.391   1
   3  -9   4  58281.  10604.   1
   3  -9   4  22911. 7802.74   1
   3  -9   4  32773. 6938.68   1
  -3  -9  -4  34912. 6308.09   1
  -3  -9  -4  20661. 6956.14   1
   3   9   4  20805. 7017.23   1
   3   9   4  40759. 7355.44   1
  -3   9  -4  20873. 7091.42   1
  -3   9  -4  30940. 6554.65   1
  -3   9  -4  34082. 6532.83   1
   3  -9   5  44752.  15071.   1
   3  -9   5  47698.  10098.   1
  -3  -9  -5  47218.  15826.   1
  -3  -9  -5  39625. 7154.69   1
   3   9   5  43029.  14432.   1
   3   9   5  40083. 7244.16   1
  -3   9  -5  51691.  17382.   1
  -3   9  -5  51516.  10899.   1
   3  -9   6  20449. 4377.04   1
  -3  -9  -6  25224. 8479.15   1
  -3  -9  -6  18697. 3447.52   1
   3   9   6  23129. 7789.65   1
   3   9   6  17770. 3301.33   1
  -3   9  -6  22889. 4907.26   1
   3  -9   7  15211. 3294.78   1
  -3  -9  -7  18339. 6198.99   1
  -3  -9  -7  12734. 2437.27   1
   3   9   7  22213. 7492.90   1
   3   9   7 9740.33 2016.80   1
  -3   9  -7  12175. 2688.19   1
  -3  -9  -8 -251.15 608.335   1
  -3  -9  -8 -944.14 694.523   1
   3   9   8 1048.00 738.162   1
   3   9   8 -158.32 1095.35   1
  -3  -9  -9  -40.98 714.815   1
   3   9   9  797.73 1172.59   1
  -3  -9 -10 1527.60 886.318   1
   3   9  10 1521.71 1257.91   1
  -3  -9 -11 2406.72 976.652   1
   3   9  11 -140.41 1317.48   1
  -3  -9 -12 2734.01 988.435   1
   3   9  12 1051.71 1330.79   1
  -3  -9 -13  515.60 797.075   1
   3   9  13 -1019.6 1223.87   1
  -3 -11  13  175.78 575.605   1
   3  11 -13 -514.73 981.670   1
  -3 -11  12   80.06 541.130   1
   3  11 -12  465.85 875.408   1
   3 -11 -11  494.22 853.370   1
  -3 -11  11  588.48 609.862   1
   3  11 -11 -634.08 836.351   1
   3 -11 -10  773.73 954.396   1
  -3 -11  10  319.88 520.837   1
   3  11 -10  740.56 719.179   1
  -3  11  10 -482.22 1084.44   1
   3 -11  -9  -85.25 939.776   1
  -3 -11   9 -335.37 936.067   1
  -3 -11   9  415.67 942.395   1
  -3 -11   9 1360.90 617.062   1
   3  11  -9  490.51 661.138   1
   3  11  -9 1803.18 1100.81   1
   3  11  -9 -497.05 1190.92   1
  -3  11   9 -486.14 1277.76   1
   3 -11  -8  381.19 572.550   1
   3 -11  -8 1006.54 809.513   1
  -3 -11   8  225.83 1216.45   1
  -3 -11   8 -377.26 1247.65   1
  -3 -11   8  378.35 450.578   1
   3  11  -8 -305.91 535.457   1
   3  11  -8 -1895.3 1611.39   1
   3  11  -8 1850.31 1248.31   1
  -3  11   8 -1141.8 1158.63   1
   3 -11  -7 2439.45 990.617   1
   3 -11  -7  109.75 698.232   1
  -3 -11   7 1801.22 1589.57   1
  -3 -11   7 1295.00 1207.29   1
  -3 -11   7  450.58 406.938   1
   3  11  -7 1360.02 1150.34   1
   3  11  -7  588.48 448.832   1
   3  11  -7  993.45 1621.43   1
  -3  11   7  642.37 595.243   1
  -3  11   7  455.16 998.253   1
   3 -11  -6  479.60 575.387   1
   3 -11  -6  166.81 597.861   1
  -3 -11   6 1226.71 1736.63   1
  -3 -11   6 -598.30 1021.38   1
  -3 -11   6  312.02 382.937   1
   3  11  -6  211.39 1134.63   1
   3  11  -6  544.84 407.593   1
   3  11  -6 1567.75 1192.23   1
  -3  11   6  615.75 612.262   1
  -3  11   6  145.01 752.563   1
   3 -11  -5  159.37 489.635   1
   3 -11  -5 -1015.7 609.862   1
  -3 -11   5 1827.40 1632.99   1
  -3 -11   5  921.01 885.445   1
  -3 -11   5   49.66 313.768   1
   3  11  -5  688.85 1063.93   1
   3  11  -5  548.98 370.063   1
   3  11  -5 1013.53 946.977   1
  -3  11   5  305.69 584.987   1
  -3  11   5  693.65 592.406   1
   3 -11  -4 1639.54 709.796   1
   3 -11  -4 1832.20 573.423   1
  -3 -11   4 -960.29 1414.57   1
  -3 -11   4  658.96 796.421   1
  -3 -11   4 1622.52 476.543   1
   3  11  -4 1739.03 940.213   1
   3  11  -4 1166.05 1046.26   1
   3  11  -4 2323.80 639.100   1
   3  11  -4 1073.10 768.492   1
  -3  11   4  332.31 518.655   1
  -3  11   4 2694.74 677.285   1
   3 -11  -3 3475.89 742.090   1
   3 -11  -3 6469.55 2223.43   1
  -3 -11   3 5201.83 1151.21   1
  -3 -11   3 4874.53 919.702   1
  -3 -11   3 4675.97 2000.65   1
  -3 -11   3 3137.68 818.459   1
   3  11  -3 8385.33 3032.94   1
   3  11  -3 4673.79 795.330   1
   3  11  -3 4418.50 1032.73   1
   3  11  -3 4189.39 994.980   1
  -3  11   3 5712.41 2002.83   1
  -3  11   3 3109.31 671.175   1
   3 -11  -2  751.04 347.807   1
   3 -11  -2 1289.77 629.718   1
   3 -11  -2  746.02 394.283   1
  -3 -11   2 -331.66 468.252   1
  -3 -11   2  267.73 292.166   1
  -3 -11   2 -283.00 886.973   1
  -3 -11   2  603.75 377.700   1
   3  11  -2 1075.50 341.479   1
   3  11  -2  277.55 436.177   1
   3  11  -2  506.65 503.600   1
   3  11  -2  938.90 930.612   1
  -3  11   2 -161.34 608.335   1
  -3  11   2  167.64 531.747   1
  -3  11   2  572.11 285.402   1
   3 -11  -1 7108.87 1330.57   1
   3 -11  -1 6934.32 948.941   1
   3 -11  -1 5537.85 1915.77   1
   3 -11  -1 6940.86 1521.27   1
  -3 -11   1 6319.00 1398.43   1
  -3 -11   1 6805.58 944.359   1
  -3 -11   1 6556.83 2356.53   1
  -3 -11   1 9799.25 1839.40   1
   3  11  -1 3362.42 1377.04   1
   3  11  -1 7719.83 1687.76   1
   3  11  -1 7080.51 983.852   1
   3  11  -1 8533.70 1625.35   1
  -3  11   1 6593.93 2317.26   1
  -3  11   1 4569.05 1095.57   1
  -3  11   1 9362.85 1719.18   1
  -3  11   1 7560.54 1037.75   1
   3 -11   0 9402.13 3198.77   1
   3 -11   0 7128.51 1322.93   1
   3 -11   0 8917.73 1916.21   1
  -3 -11   0 7172.15 1351.73   1
  -3 -11   0 8690.80 1193.76   1
  -3 -11   0 9454.50 3244.60   1
  -3 -11   0  13334. 2860.57   1
   3  11   0  17323. 5860.78   1
   3  11   0 7890.02 1721.14   1
   3  11   0 7521.27 1038.84   1
  -3  11   0  15287. 5177.83   1
  -3  11   0 6552.47 898.755   1
  -3  11   0 7512.54 1618.59   1
   3 -11   1  17179. 5812.78   1
   3 -11   1 9779.61 1813.00   1
   3 -11   1  11626. 2478.72   1
  -3 -11  -1  11370. 1551.82   1
  -3 -11  -1  16134. 5444.03   1
  -3 -11  -1  14918. 2723.10   1
  -3 -11  -1  12463. 2679.46   1
   3  11   1 9777.43 2151.21   1
   3  11   1  16600. 5616.40   1
   3  11   1  13343. 1816.49   1
   3  11   1  14875. 2720.92   1
  -3  11  -1  13904. 4761.07   1
  -3  11  -1  12304. 2627.10   1
  -3  11  -1  10609. 1964.00   1
   3 -11   2 2880.21 1332.75  -1
   3 -11   2 2581.28 682.958  -1
   3 -11   2 3270.78 738.817  -1
  -3 -11  -2 2168.23 417.848  -1
  -3 -11  -2 2136.37 903.556  -1
  -3 -11  -2 1951.34 538.730  -1
  -3 -11  -2 3310.06 826.096  -1
   3  11   2 2118.26 774.383  -1
   3  11   2 1453.63 769.364  -1
   3  11   2 1691.47 293.039  -1
   3  11   2 3709.36 802.748  -1
  -3  11  -2 4488.32 1853.59  -1
  -3  11  -2 3419.15 795.766  -1
  -3  11  -2 2557.27 705.651  -1
   3 -11   3 2978.40 1494.65   1
   3 -11   3   -5.42 721.797   1
   3 -11   3 1294.13 376.172   1
  -3 -11  -3 -2967.5 2616.19   1
  -3 -11  -3 2095.57 919.266   1
  -3 -11  -3   30.18 353.262   1
  -3 -11  -3  642.59 478.725   1
   3  11   3 -227.80 707.396   1
   3  11   3 1362.43 809.731   1
   3  11   3  810.60 357.189   1
   3  11   3   15.01 318.786   1
  -3  11  -3 2179.36 1221.25   1
  -3  11  -3  464.98 291.075   1
  -3  11  -3 2076.80 897.446   1
   3 -11   4  404.54 1387.30   1
   3 -11   4 -641.94 834.605   1
   3 -11   4 2373.99 601.134   1
  -3 -11  -4 -1918.6 2413.26   1
  -3 -11  -4  -60.09 540.475   1
  -3 -11  -4 1208.60 494.435   1
  -3 -11  -4  668.34 490.726   1
   3  11   4  993.67 406.065   1
   3  11   4  126.60 859.480   1
   3  11   4  504.47 581.714   1
   3  11   4  555.09 460.397   1
  -3  11  -4  291.51 1086.19   1
  -3  11  -4  926.25 382.500   1
  -3  11  -4 -1044.3 1020.95   1
   3 -11   5 -396.68 1504.25   1
   3 -11   5 3475.89 1852.50   1
   3 -11   5 1725.07 531.747   1
  -3 -11  -5 1408.90 668.339   1
  -3 -11  -5 1916.21 621.645   1
   3  11   5 1078.99 646.737   1
   3  11   5 1422.87 594.806   1
  -3  11  -5 4008.29 1771.33   1
  -3  11  -5 1474.58 540.475   1
  -3  11  -5 -395.16 1579.97   1
   3 -11   6 4660.70 2053.67   1
  -3 -11  -6 2520.18  999.34   1
  -3 -11  -6 4019.20 930.176   1
   3  11   6 4425.04 1604.41   1
   3  11   6 3822.82 928.867   1
  -3  11  -6 3382.06 1680.78   1
  -3  11  -6  827.19 2116.52   1
   3 -11   7 1170.41 499.890   1
  -3 -11  -7 3235.87 1200.30   1
  -3 -11  -7 1725.94 675.539   1
   3  11   7 2790.75 1097.10   1
   3  11   7 1926.47 828.932   1
  -3  11  -7 1864.50 616.408   1
   3 -11   8  363.08 507.527   1
  -3 -11  -8  507.31 533.493   1
  -3 -11  -8 -425.05 695.177   1
   3  11   8  850.53 654.374   1
   3  11   8 -167.62 832.205   1
  -3  11  -8 -236.96 696.486   1
   3 -11   9 1257.91 609.207   1
  -3 -11  -9  685.14 795.112   1
  -3 -11  -9  428.54 605.716   1
   3  11   9  924.50 1138.77   1
   3  11   9  139.80 618.153   1
  -3  11  -9 -244.60 716.997   1
   3 -11  10 -313.55 620.772   1
  -3 -11 -10 -190.97 584.115   1
  -3 -11 -10  -59.31 801.221   1
   3  11  10 -159.15 621.426   1
   3  11  10  -21.61 1209.25   1
  -3 -11 -11  955.05 722.015   1
   3  11  11 1432.68 1148.81   1
  -3 -11 -12  290.42 665.720   1
   3  11  12 -578.01 1072.44   1
  -3 -13  12  -61.36 591.097   1
   3  13 -12   54.35 659.393   1
   3 -13 -11  -62.01 746.672   1
  -3 -13  11 -509.49 578.878   1
   3  13 -11  454.29 725.070   1
   3  13 -11 -1170.4 834.823   1
   3  13 -11 -387.74 711.542   1
  -3  13  11 -647.17 938.031   1
   3 -13 -10 -461.71 765.873   1
  -3 -13  10 -209.38 869.735   1
  -3 -13  10  906.17 903.774   1
  -3 -13  10  853.59 550.512   1
   3  13 -10 1147.06 727.907   1
   3  13 -10  778.31 754.527   1
   3  13 -10 -680.12 936.722   1
  -3  13  10 -357.41 954.832   1
   3 -13  -9 1117.17 771.983   1
   3 -13  -9 1012.87 618.808   1
  -3 -13   9  837.22 1043.86   1
  -3 -13   9  155.68 472.179   1
  -3 -13   9 -126.88 903.556   1
   3  13  -9  313.11 966.397   1
   3  13  -9  869.30 607.898   1
   3  13  -9 -766.96 982.543   1
  -3  13   9  808.64 627.754   1
  -3  13   9 1176.30 951.341   1
   3 -13  -8 1652.85 892.209   1
   3 -13  -8  -96.38 539.166   1
  -3 -13   8 -439.23 952.868   1
  -3 -13   8   -9.51 859.262   1
  -3 -13   8  255.07 494.654   1
   3  13  -8 1261.84 957.450   1
   3  13  -8  -58.74 505.782   1
   3  13  -8  492.04 944.795   1
  -3  13   8 -131.09 574.296   1
  -3  13   8  538.73 1066.33   1
   3 -13  -7  543.09 513.855   1
   3 -13  -7 -348.68 765.873   1
  -3 -13   7 -1027.7 1151.86   1
  -3 -13   7 -1146.4 907.920   1
  -3 -13   7   83.24 428.758   1
   3  13  -7  303.51 877.590   1
   3  13  -7  884.35 504.254   1
   3  13  -7 1664.85 1009.38   1
  -3  13   7  836.13 607.680   1
  -3  13   7  601.35 835.478   1
   3 -13  -6  728.78 611.389   1
   3 -13  -6  664.41 520.183   1
  -3 -13   6 1424.17 1360.02   1
  -3 -13   6  934.32 407.593   1
  -3 -13   6  647.39 1003.27   1
   3  13  -6  837.88 894.828   1
   3  13  -6  986.25 498.799   1
   3  13  -6  523.46 903.338   1
  -3  13   6  620.77 520.401   1
  -3  13   6 1335.15 719.615   1
   3 -13  -5 1057.38 555.313  -1
   3 -13  -5 1329.91 567.095  -1
  -3 -13   5 -403.88 1260.31  -1
  -3 -13   5  339.08 828.278  -1
  -3 -13   5 2330.35 602.880  -1
   3  13  -5 1012.44 927.776  -1
   3  13  -5 2912.94 757.582  -1
   3  13  -5  583.90 849.443  -1
  -3  13   5 1289.77 675.103  -1
  -3  13   5 1955.27 591.752  -1
   3 -13  -4 1524.55 571.023   1
   3 -13  -4   38.80 401.483   1
  -3 -13   4 1660.48 1184.81   1
  -3 -13   4  823.91 360.680   1
  -3 -13   4  157.91 641.282   1
   3  13  -4 -248.96 912.065   1
   3  13  -4  198.19 616.408   1
   3  13  -4  246.34 422.867   1
   3  13  -4   66.88 620.117   1
  -3  13   4  420.68 499.672   1
  -3  13   4  658.30 433.340   1
   3 -13  -3  990.83 561.422   1
   3 -13  -3 2677.28 692.995   1
   3 -13  -3 2139.21 629.063   1
  -3 -13   3 1960.29 621.426   1
  -3 -13   3 2384.90 1317.48   1
  -3 -13   3 2430.72 770.019   1
  -3 -13   3 1869.73 547.239   1
   3  13  -3 2823.48 621.426   1
   3  13  -3 1488.54 568.841   1
   3  13  -3 1020.73 956.141   1
   3  13  -3 3571.89 931.921   1
  -3  13   3 1618.37 747.763   1
  -3  13   3 2958.76 960.069   1
  -3  13   3 3663.54 813.004   1
   3 -13  -2 2286.71 893.082  -1
   3 -13  -2  255.07 417.630  -1
   3 -13  -2 1107.13 512.328  -1
  -3 -13   2  659.83 329.478  -1
  -3 -13   2  671.39 786.165  -1
  -3 -13   2 -275.80 428.103  -1
  -3 -13   2 1898.97 541.784  -1
   3  13  -2  475.45 436.177  -1
   3  13  -2 1276.46 864.062  -1
   3  13  -2 -488.11 462.579  -1
   3  13  -2  -73.55 281.693  -1
  -3  13   2 1311.15 714.160  -1
  -3  13   2  427.67 351.080  -1
   3 -13  -1 8511.88 1589.79   1
   3 -13  -1 8937.37 3037.31   1
   3 -13  -1 9522.14 2073.09   1
  -3 -13   1 8476.97 2960.94   1
  -3 -13   1  10349. 1418.28   1
  -3 -13   1  10325. 1941.74   1
  -3 -13   1 5627.31 1262.49   1
   3  13  -1 8520.61 2978.40   1
   3  13  -1 7741.65 1707.61   1
   3  13  -1 8332.96 1157.97   1
   3  13  -1  10092. 1884.35   1
  -3  13   1 8402.78 2888.93   1
  -3  13   1 5967.70 1392.10   1
  -3  13   1 9325.76 1717.87   1
   3 -13   0 2417.63 976.434   1
   3 -13   0 1986.03 474.798   1
   3 -13   0 1737.29 520.401   1
  -3 -13   0 2019.20 317.477   1
  -3 -13   0 3430.06 1316.60   1
  -3 -13   0 1957.89 487.671   1
  -3 -13   0 1285.84 505.345   1
   3  13   0 1850.75 298.494   1
   3  13   0 1928.65 584.115   1
   3  13   0 1687.32 466.506   1
   3  13   0 2969.67 1223.21   1
  -3  13   0 2166.48 931.921   1
  -3  13   0 1690.81 428.976   1
  -3  13   0 2950.03 721.579   1
  -3  13   0 2629.28 387.955   1
   3 -13   1 7471.08 1429.63   1
   3 -13   1 8474.79 2928.21   1
   3 -13   1 7440.53 1611.82   1
  -3 -13  -1 8409.33 1577.35   1
  -3 -13  -1 9282.12 2035.35   1
  -3 -13  -1 8234.77 1129.17   1
  -3 -13  -1 8797.72 3006.76   1
   3  13   1 9168.66 1253.98   1
   3  13   1 9351.94 3218.41   1
   3  13   1 7924.93 1787.69   1
   3  13   1 9018.10 1679.47   1
  -3  13  -1 8175.86 2838.75   1
  -3  13  -1 9149.02 1727.91   1
  -3  13  -1 7333.62 1602.88   1
   3 -13   2  673.79 783.329   1
   3 -13   2 1606.59 615.535   1
   3 -13   2 1956.14 529.565   1
  -3 -13  -2  811.26 434.431   1
  -3 -13  -2 1351.95 296.749   1
  -3 -13  -2 1564.04 614.880   1
  -3 -13  -2 1578.00 757.800   1
   3  13   2 1612.26 275.365   1
   3  13   2 1698.89 868.426   1
   3  13   2  555.97 676.194   1
   3  13   2 1198.34 443.159   1
  -3  13  -2  992.58 813.222   1
  -3  13  -2  535.24 565.350   1
  -3  13  -2 1644.55 540.693   1
   3 -13   3 1236.31 1009.16   1
   3 -13   3  639.54 749.290   1
   3 -13   3 2180.88 564.477   1
  -3 -13  -3 1047.13 1357.19   1
  -3 -13  -3  202.53 526.292   1
  -3 -13  -3 2662.01 668.775   1
  -3 -13  -3 1562.29 636.482   1
   3  13   3 2236.52 970.324   1
   3  13   3   25.16 623.608   1
   3  13   3 3052.58 472.179   1
   3  13   3 3427.88 778.092   1
  -3  13  -3  483.09 815.840   1
  -3  13  -3 1791.62 543.530   1
  -3  13  -3 1536.55 691.686   1
   3 -13   4 1356.32 878.899   1
   3 -13   4  271.00 1122.63   1
   3 -13   4   94.46 329.915   1
  -3 -13  -4  -82.59 469.779   1
  -3 -13  -4 -1720.3 1008.29   1
  -3 -13  -4 1188.52 601.570   1
  -3 -13  -4 1058.26 541.784   1
   3  13   4 1118.70 670.957   1
   3  13   4   95.02 209.644   1
   3  13   4 1038.40 935.194   1
   3  13   4  851.41 523.674   1
  -3  13  -4 -607.90 898.974   1
  -3  13  -4  208.23 775.692   1
  -3  13  -4  748.20 390.137   1
   3 -13   5  812.35 1018.55   1
   3 -13   5 -718.09 1149.46   1
   3 -13   5  -69.08 366.354   1
  -3 -13  -5  837.44 555.094   1
  -3 -13  -5  636.70 551.385   1
   3  13   5 -421.56 590.224   1
   3  13   5    9.14 500.763   1
  -3  13  -5   17.14 956.359   1
  -3  13  -5  991.93 446.868   1
  -3  13  -5 -1140.7 995.635   1
   3 -13   6 -589.79 777.001   1
   3 -13   6 1447.09 1047.57   1
   3 -13   6  663.76 403.884   1
  -3 -13  -6  409.99 567.750   1
  -3 -13  -6 1305.91 628.627   1
   3  13   6  763.69 632.118   1
   3  13   6  914.03 567.095   1
  -3  13  -6  891.77 890.246   1
  -3  13  -6  900.94 524.110   1
  -3  13  -6 -1624.9 1011.35   1
   3 -13   7 -169.41 876.499   1
   3 -13   7  207.55 958.323   1
   3 -13   7 1766.96 612.044   1
  -3 -13  -7 1405.85 708.051   1
  -3 -13  -7  839.84 619.026   1
   3  13   7 1774.16 850.752   1
   3  13   7  868.64 665.284   1
  -3  13  -7 1935.19 1151.86   1
  -3  13  -7 1467.60 618.372   1
  -3  13  -7 -664.85 1243.94   1
   3 -13   8  254.85 868.862  -1
   3 -13   8  985.38 561.640  -1
  -3 -13  -8 1668.56 773.292  -1
  -3 -13  -8  586.73 662.666  -1
   3  13   8  296.97 605.062  -1
   3  13   8  658.08 797.948  -1
  -3  13  -8  663.97 907.701  -1
  -3  13  -8  315.08 544.403  -1
   3 -13   9   26.88 592.624   1
  -3 -13  -9  411.96 555.749   1
  -3 -13  -9 -276.67 761.509   1
   3  13   9 -482.87 624.263   1
   3  13   9 -276.46 860.353   1
  -3  13  -9 -121.45 695.832   1
   3 -13  10  612.04 607.025   1
  -3 -13 -10  564.48 515.819   1
  -3 -13 -10 1654.15 775.910   1
   3  13  10  768.27 615.317   1
   3  13  10 1598.08 1009.16   1
  -3  13 -10 1213.18 827.623   1
   3 -13  11  162.67 569.714   1
  -3 -13 -11 -446.65 671.830   1
  -3 -13 -11 1125.24 662.884   1
   3  13  11 -320.97 982.107   1
   3  13  11  108.86 609.862   1
  -3  13 -11  217.78 740.344   1
   3 -13  12  113.20 575.169   1
  -3 -13 -12  270.13 610.298   1
  -3  13 -12 -217.37 694.523   1
   3 -15 -10 1476.32 745.144   1
  -3 -15  10  559.24 794.239   1
  -3 -15  10  149.23 566.004   1
   3  15 -10 -367.23 677.940   1
   3  15 -10  757.80 604.407   1
  -3  15  10  713.72 692.341   1
   3 -15  -9  398.21 739.253   1
   3 -15  -9    7.79 454.942   1
  -3 -15   9  -34.85 730.089   1
  -3 -15   9  -63.23 554.440   1
  -3 -15   9 -1018.8 776.783   1
   3  15  -9  330.79 672.485   1
   3  15  -9  538.51 601.570   1
   3  15  -9 -617.06 837.005   1
  -3  15   9  636.70 629.936   1
  -3  15   9  420.68 875.845   1
   3 -15  -8  756.71 744.272   1
   3 -15  -8  331.44 438.577   1
  -3 -15   8   11.96 741.435   1
  -3 -15   8  375.30 779.183   1
  -3 -15   8  -21.48 536.548   1
   3  15  -8 -460.40 691.250   1
   3  15  -8  336.02 607.680   1
   3  15  -8  212.00 773.292   1
  -3  15   8  650.01 534.147   1
  -3  15   8  952.65 825.223   1
   3 -15  -7  883.48 541.566   1
   3 -15  -7 1169.97 690.159   1
  -3 -15   7 -132.77 876.063   1
  -3 -15   7 1607.46 901.810   1
  -3 -15   7   24.85 428.976   1
   3  15  -7 1240.02 775.256   1
   3  15  -7  562.73 530.438   1
   3  15  -7  373.12 807.767   1
  -3  15   7  731.18 536.329   1
  -3  15   7 1511.67 761.073   1
   3 -15  -6 1247.43 643.464  -1
   3 -15  -6  517.56 446.868  -1
  -3 -15   6 -262.27 904.428  -1
  -3 -15   6 -155.05 453.851  -1
  -3 -15   6 -764.78 771.983  -1
   3  15  -6 -1210.6 904.865  -1
   3  15  -6  504.69 515.382  -1
   3  15  -6  151.01 812.567  -1
  -3  15   6  983.63 649.792  -1
  -3  15   6 -260.09 586.078  -1
   3 -15  -5  364.39 512.982   1
   3 -15  -5  -16.44 427.885   1
  -3 -15   5  475.23 463.233   1
  -3 -15   5 -236.74 866.026   1
  -3 -15   5  727.91 1109.75   1
   3  15  -5 -1241.8 989.744   1
   3  15  -5 1898.75 759.764   1
   3  15  -5  236.74 811.913   1
  -3  15   5  486.36 556.404   1
  -3  15   5  158.59 485.489   1
   3 -15  -4 1836.13 591.752   1
   3 -15  -4 1433.99 633.209   1
  -3 -15   4 1382.50 465.633   1
  -3 -15   4  371.15 544.403   1
  -3 -15   4 1540.04 1063.49   1
  -3 -15   4  566.88 829.369   1
   3  15  -4 1483.52 991.707   1
   3  15  -4 -545.49 522.801   1
   3  15  -4  639.76 575.605   1
   3  15  -4 1268.38 853.370   1
  -3  15   4 1461.92 703.687   1
  -3  15   4 1155.79 505.127   1
   3 -15  -3  566.66 501.200   1
   3 -15  -3 1136.81 486.799   1
   3 -15  -3 1785.73 616.190   1
  -3 -15   3  454.07 449.487   1
  -3 -15   3  518.66 929.958   1
  -3 -15   3  947.63 752.563   1
  -3 -15   3  887.19 390.792   1
   3  15  -3  287.37 399.738   1
   3  15  -3  687.76 532.184   1
   3  15  -3 1816.49 767.182   1
   3  15  -3  699.54 778.310   1
  -3  15   3  145.80 641.501   1
  -3  15   3  866.46 400.829   1
  -3  15   3  841.15 743.617   1
   3 -15  -2 1851.19 794.675   1
   3 -15  -2 1485.05 578.660   1
   3 -15  -2 2864.93 790.093   1
  -3 -15   2 1485.92 631.027   1
  -3 -15   2 1909.23 569.059   1
  -3 -15   2 2223.43 1063.06   1
   3  15  -2 1625.79 965.087   1
   3  15  -2 2882.39 794.893   1
   3  15  -2  955.92 578.223   1
  -3  15   2  583.24 685.140   1
  -3  15   2 1989.31 517.564   1
  -3  15   2 1298.49 729.434   1
   3 -15  -1 1945.23 804.930   1
   3 -15  -1 1547.24 578.223   1
   3 -15  -1  822.17 527.383   1
  -3 -15   1 2240.89 659.611   1
  -3 -15   1 2126.12 352.825   1
  -3 -15   1 1244.82 486.144   1
  -3 -15   1  923.19 719.397   1
   3  15  -1 1788.78 329.478   1
   3  15  -1 1284.75 844.206   1
   3  15  -1 2201.61 682.958   1
   3  15  -1 1360.68 486.580   1
  -3  15   1  948.50 679.249   1
  -3  15   1 2552.91 602.007   1
  -3  15   1 2336.89 744.053   1
   3 -15   0 1214.71 687.322   1
   3 -15   0 2511.45 568.841   1
   3 -15   0  234.56 428.103   1
  -3 -15   0 1170.19 214.532   1
  -3 -15   0 2513.63 1047.13   1
  -3 -15   0 1668.77 482.216   1
  -3 -15   0   44.05 455.596   1
   3  15   0 1326.42 583.024   1
   3  15   0 1123.28 786.820   1
   3  15   0 1460.40 247.218   1
   3  15   0 1536.55 454.505   1
  -3  15   0 2168.23 320.532   1
  -3  15   0 1435.74 810.385   1
  -3  15   0  959.85 431.376   1
  -3  15   0 1208.38 364.826   1
   3 -15   1 -223.22 444.468  -1
   3 -15   1 -597.21 642.592  -1
   3 -15   1   57.93 327.514  -1
  -3 -15  -1   56.73 500.327  -1
  -3 -15  -1   77.59 112.786  -1
  -3 -15  -1  731.62 528.911  -1
  -3 -15  -1 -497.93 494.435  -1
   3  15   1 1270.13 817.804  -1
   3  15   1  114.73 617.062  -1
   3  15   1  223.87 115.361  -1
   3  15   1  341.48 442.504  -1
  -3  15  -1 1087.28 786.820  -1
  -3  15  -1  844.42 428.103  -1
  -3  15  -1  -55.51 422.648  -1
   3 -15   2  901.37 747.108   1
   3 -15   2 1770.45 727.689   1
   3 -15   2 1096.22 389.919   1
  -3 -15  -2 1206.63 261.401   1
  -3 -15  -2 1202.05 672.485   1
  -3 -15  -2 1470.87 620.772   1
  -3 -15  -2  373.99 587.169   1
   3  15   2 1277.33 901.810   1
   3  15   2  831.33 754.963   1
   3  15   2 1488.32 257.909   1
   3  15   2 1332.31 509.709   1
  -3  15  -2  891.55 794.893   1
  -3  15  -2 1883.48 567.750   1
  -3  15  -2 1330.79 596.552   1
   3 -15   3 1642.15 976.434   1
   3 -15   3  558.37 755.836   1
   3 -15   3  650.66 357.407   1
  -3 -15  -3 -193.82 1193.76   1
  -3 -15  -3  527.17 564.695   1
  -3 -15  -3 1329.04 580.405   1
  -3 -15  -3  187.24 550.512   1
   3  15   3 -599.61 892.646   1
   3  15   3  715.91 759.764   1
   3  15   3  646.08 212.044   1
   3  15   3  142.61 427.667   1
  -3  15  -3 -163.67 779.401   1
  -3  15  -3 -388.39 429.631   1
  -3  15  -3  838.53 702.596   1
   3 -15   4  806.89 921.012   1
   3 -15   4 -700.20 835.914   1
   3 -15   4 -147.35 423.085   1
  -3 -15  -4 -1074.4 1080.30   1
  -3 -15  -4   18.91 520.401   1
  -3 -15  -4  252.02 466.943   1
  -3 -15  -4  787.04 544.184   1
   3  15   4  126.31 267.728   1
   3  15   4 -852.93 922.975   1
   3  15   4  269.47 648.919   1
   3  15   4  221.03 452.542   1
  -3  15  -4  320.31 830.678   1
  -3  15  -4  -92.60 377.482   1
  -3  15  -4 -595.68 787.911   1
   3 -15   5 1946.32 883.700   1
   3 -15   5 2400.17 1236.09   1
   3 -15   5 1729.43 582.587   1
  -3 -15  -5 1896.14 678.158   1
  -3 -15  -5 -425.92 1068.08   1
  -3 -15  -5 3172.59 1161.03   1
  -3 -15  -5 2129.61 684.267   1
   3  15   5 2740.56 1126.99   1
   3  15   5 1379.44 994.326   1
   3  15   5 1942.39 605.934   1
  -3  15  -5 2249.62 1108.01   1
  -3  15  -5 2133.32 597.425   1
   3 -15   6   77.55 831.332  -1
   3 -15   6  235.44 989.307  -1
   3 -15   6 -550.29 448.614  -1
  -3 -15  -6 1119.35 584.115  -1
  -3 -15  -6  355.88 485.708  -1
   3  15   6 -159.33 552.912  -1
   3  15   6  550.95 538.511  -1
  -3  15  -6 1415.01 985.598  -1
  -3  15  -6   73.97 430.285  -1
  -3  15  -6   26.71 1006.33  -1
   3 -15   7  922.76 806.021  -1
   3 -15   7 1091.42 847.261  -1
   3 -15   7  456.91 509.055  -1
  -3 -15  -7  516.26 439.668  -1
  -3 -15  -7 1286.27 625.790  -1
   3  15   7 2454.72 1020.07  -1
   3  15   7  187.10 529.129  -1
  -3  15  -7  565.13 737.289  -1
  -3  15  -7 1233.69 590.006  -1
  -3  15  -7  284.53 1012.87  -1
   3 -15   8  637.35 787.256   1
   3 -15   8  -41.00 707.833   1
   3 -15   8  371.59 539.602   1
  -3 -15  -8  327.51 485.926   1
  -3 -15  -8 -229.54 664.411   1
   3  15   8 -378.14 552.040   1
   3  15   8 -803.84 719.615   1
  -3  15  -8  921.45 758.018   1
  -3  15  -8  593.93 1036.00   1
  -3  15  -8  562.08 572.768   1
   3 -15   9  823.04 760.855   1
   3 -15   9  435.09 550.730   1
  -3 -15  -9  261.40 539.602   1
   3  15   9  562.73 638.882   1
  -3  15  -9  152.13 673.357   1
  -3  15  -9  256.16 556.404   1
   3 -15  10  487.67 602.007  -1
  -3 -15 -10  183.63 514.291  -1
   3  15  10  700.20 670.303  -1
  -3  15 -10  138.56 634.300  -1
  -3  15 -10 1107.57 604.189  -1
   3 -17  -7  324.46 471.743   1
  -3 -17   7  116.56 751.254   1
  -3 -17   7 1150.99 624.699   1
   3  17  -7  347.59 564.040   1
   3  17  -7 -338.64 545.275   1
  -3  17   7 1040.37 714.597   1
   3 -17  -6   -4.97 452.978   1
  -3 -17   6  997.60 752.999   1
  -3 -17   6  702.81 541.348   1
   3  17  -6  452.11 602.880   1
   3  17  -6 1374.64 647.610   1
  -3  17   6   35.81 552.912   1
   3 -17  -5  237.40 586.078   1
   3 -17  -5 2184.16 870.390   1
  -3 -17   5  875.63 841.369   1
  -3 -17   5 1191.14 721.143   1
  -3 -17   5  449.92 471.743   1
   3  17  -5  191.99 625.572   1
   3  17  -5  268.38 653.283   1
   3  17  -5  281.04 651.756   1
  -3  17   5 1576.48 793.802   1
  -3  17   5 1531.53 680.340   1
   3 -17  -4  -12.51 522.147   1
   3 -17  -4  317.26 420.903   1
   3 -17  -4  513.42 629.936   1
  -3 -17   4 -451.67 694.959   1
  -3 -17   4 -105.91 378.573   1
  -3 -17   4  305.04 449.705   1
  -3 -17   4 -391.23 825.441   1
   3  17  -4  492.47 460.178   1
   3  17  -4 1399.30 702.596   1
   3  17  -4 -170.91 657.865   1
   3  17  -4  290.20 754.963   1
  -3  17   4 -723.54 619.899   1
  -3  17   4 -815.40 719.179   1
  -3  17   4 -556.62 499.890   1
   3 -17  -3  381.41 403.884  -1
   3 -17  -3  817.37 540.475  -1
   3 -17  -3  628.19 694.523  -1
  -3 -17   3 -362.21 301.549  -1
  -3 -17   3 1344.53 867.771  -1
  -3 -17   3  948.94 688.413  -1
  -3 -17   3  674.45 451.014  -1
   3  17  -3  847.04 565.350  -1
   3  17  -3 -222.13 694.959  -1
   3  17  -3  274.06 372.463  -1
   3  17  -3 1270.35 605.498  -1
  -3  17   3  243.73 545.275  -1
  -3  17   3  476.54 719.179  -1
  -3  17   3  158.70 403.884  -1
   3 -17  -2   95.02 392.319   1
   3 -17  -2  -96.73 520.837   1
   3 -17  -2  296.09 663.539   1
  -3 -17   2 -504.91 276.893   1
  -3 -17   2  197.53 761.509   1
  -3 -17   2 -116.71 512.109   1
  -3 -17   2  528.26 415.230   1
   3  17  -2 -245.69 252.018   1
   3  17  -2  590.44 534.584   1
   3  17  -2  306.79 703.687   1
   3  17  -2  357.41 505.345   1
  -3  17   2  763.25 636.264   1
  -3  17   2 -606.81 670.521   1
  -3  17   2  639.54 418.721   1
   3 -17  -1  627.32 445.559  -1
   3 -17  -1  710.89 488.326  -1
   3 -17  -1  702.38 629.281  -1
  -3 -17   1  494.44 454.724  -1
  -3 -17   1  514.95 206.371  -1
  -3 -17   1 1123.50 782.238  -1
  -3 -17   1  307.22 442.504  -1
   3  17  -1 -315.51 679.903  -1
   3  17  -1  221.91 231.944  -1
   3  17  -1  700.63 492.908  -1
   3  17  -1  459.96 362.426  -1
  -3  17   1 -320.53 604.407  -1
  -3  17   1  541.35 366.572  -1
  -3  17   1  245.91 542.657  -1
   3 -17   0 1290.64 683.613   1
   3 -17   0 1043.42 379.664   1
   3 -17   0  474.36 528.474   1
  -3 -17   0 1759.54 464.324   1
  -3 -17   0 1111.28 214.074   1
  -3 -17   0  272.31 562.295   1
  -3 -17   0 1941.96 858.825   1
   3  17   0 1028.80 199.978   1
   3  17   0 1096.01 751.472   1
   3  17   0  780.93 571.896   1
   3  17   0 1130.70 370.936   1
  -3  17   0 1119.35 821.077   1
  -3  17   0  691.47 299.367   1
  -3  17   0  942.39 420.685   1
   3 -17   1  131.51 629.281   1
   3 -17   1 -208.05 497.054   1
   3 -17   1  179.84 367.445   1
  -3 -17  -1  251.36 107.113   1
  -3 -17  -1    5.25 426.794   1
  -3 -17  -1  234.34 393.846   1
  -3 -17  -1 -165.35 620.772   1
   3  17   1  593.50 708.487   1
   3  17   1 -104.32 583.242   1
   3  17   1  304.82 114.772   1
   3  17   1  271.87 370.499   1
  -3  17  -1   33.80 749.727   1
  -3  17  -1  727.25 385.991   1
  -3  17  -1  486.36 448.396   1
   3 -17   2  213.96 632.118   1
   3 -17   2  945.89 736.635   1
   3 -17   2  750.60 418.066   1
  -3 -17  -2  480.91 521.928   1
  -3 -17  -2  901.59 209.906   1
  -3 -17  -2  937.16 523.892   1
  -3 -17  -2 -278.20 585.642   1
   3  17   2  658.30 623.608   1
   3  17   2  751.91 182.522   1
   3  17   2  837.88 807.767   1
   3  17   2 1073.75 504.254   1
  -3  17  -2 2679.46 1199.21   1
  -3  17  -2 -768.93 553.785   1
  -3  17  -2  516.69 389.264   1
   3 -17   3  293.26 793.584   1
   3 -17   3 1378.79 709.360   1
   3 -17   3 -128.54 455.814   1
  -3 -17  -3 -483.74 554.876   1
  -3 -17  -3  593.50 417.194   1
  -3 -17  -3 -650.45 606.153   1
  -3 -17  -3 -185.25 406.938   1
   3  17   3  101.40 156.928   1
   3  17   3   68.36 526.729   1
   3  17   3  449.27 873.444   1
   3  17   3   84.92 461.706   1
  -3  17  -3 -250.93 833.078   1
  -3  17  -3 -166.11 622.954   1
  -3  17  -3  473.05 500.327   1
   3 -17   4 1286.27 810.167   1
   3 -17   4 -166.55 738.162   1
   3 -17   4  821.73 567.095   1
  -3 -17  -4  123.52 901.592   1
  -3 -17  -4 1988.87 797.948   1
  -3 -17  -4 1842.90 687.104   1
  -3 -17  -4 -598.95 665.066   1
   3  17   4 -175.76 963.124   1
   3  17   4   21.68 627.099   1
   3  17   4  943.27 272.965   1
   3  17   4 1004.36 516.910   1
  -3  17  -4  851.84 765.437   1
  -3  17  -4 1529.78 588.915   1
  -3  17  -4  601.13 672.703   1
   3 -17   5 1278.86 776.128   1
   3 -17   5  147.52 686.231   1
   3 -17   5   22.76 580.842   1
  -3 -17  -5    7.85 447.087   1
  -3 -17  -5 1446.21 764.346   1
  -3 -17  -5 -303.95 576.914   1
  -3 -17  -5  227.36 609.207   1
   3  17   5  235.65 566.441   1
   3  17   5  403.67 994.108   1
   3  17   5   23.17 541.784   1
  -3  17  -5 -221.69 639.755   1
  -3  17  -5 -224.09 454.069   1
  -3  17  -5  563.60 756.272   1
   3 -17   6  594.81 746.235   1
   3 -17   6 -866.90 573.859   1
  -3 -17  -6  187.65 485.271   1
   3  17   6  881.08 706.305   1
  -3  17  -6  502.73 585.206   1
  -3  17  -6  651.32 447.741   1
   3 -17   7 -360.24 698.668   1
   3 -17   7   -8.13 508.836   1
  -3 -17  -7  162.01 480.253   1
   3  17   7   76.46 625.354   1
  -3  17  -7 -677.07 685.576   1
  -3  17  -7 -629.28 478.071   1
  -3 -19   4  -65.79 303.513   1
   3  19  -4  -46.67 336.679   1
  -3 -19   3   24.59 224.525   1
   3  19  -3  132.01 259.655   1
  -3 -19   2 -238.05 190.814   1
   3  19  -2  -78.01 193.301   1
  -3 -19   1  375.74 145.320   1
   3  19  -1   62.47 205.520   1
  -3 -19   0    8.27 118.525   1
   3  19   0  -43.79 146.454   1
  -3 -19  -1  713.07 140.214   1
   3  19   1  832.64 165.590   1
  -3 -19  -2  142.83 129.326   1
   3  19   2  194.52 135.544   1
  -3 -19  -3 -133.82 193.454   1
   3  19   3   -6.72 119.376   1
  -3 -19  -4 -140.39 689.504   1
   3  19   4  128.95 147.632   1
   4   0  -4  53087.  11246.   1
  -4   0   4  48876.  10364.   1
   4   0  -3 195636.  26446.   1
   4   0  -3 285184.  60222.   1
  -4   0   3 203207.  27471.   1
  -4   0   3 336242.  70980.   1
   4   0  -2 838096. 150251.  -1
   4   0  -2 567095.  76587.  -1
   4   0  -2 587169. 123958.  -1
  -4   0   2 538511.  72725.  -1
  -4   0   2 567313. 119769.  -1
  -4   0   2 811913. 145494.  -1
   4   0  -1  19585. 6576.47   1
   4   0  -1  15125. 2067.64   1
   4   0  -1  15167. 2766.74   1
   4   0  -1  21381. 4523.23   1
  -4   0   1  19959. 6707.39   1
  -4   0   1  13592. 1863.41   1
  -4   0   1  13046. 2766.74   1
  -4   0   1  12817. 2354.35   1
   4   0   0 2297.62 520.619   1
   4   0   0 2036.66 729.216   1
   4   0   0 4996.72 1074.40   1
  -4   0   0 1483.31 565.786   1
  -4   0   0 4187.21 907.701   1
  -4   0   0 2371.81 539.166   1
   4   0   1  13029. 4379.22   1
  -4   0  -1  12869. 4326.86   1
   4   0   2  15793. 2912.94   1
  -4   0  -2  17417. 3200.96   1
  -4  -2   6 2186.34 990.398   1
   4   2  -6 5566.22 1408.90   1
  -4  -2   5 1010.04 611.607  -1
   4   2  -5 1830.46 633.864  -1
  -4  -2   4  13443. 2886.75   1
   4   2  -4  13980. 2004.58   1
   4   2  -4  11578. 2491.81   1
   4  -2  -3 255291.  34519.   1
  -4  -2   3 252673.  34148.   1
  -4  -2   3 243945.  51495.   1
   4   2  -3 246781.  33362.   1
   4   2  -3 154789.  32686.   1
  -4   2   3 234999.  31748.   1
   4  -2  -2 545712.  73707.   1
  -4  -2   2 508618.  68710.   1
  -4  -2   2 457778.  96661.   1
   4   2  -2 531747.  71809.   1
   4   2  -2 474143. 100087.   1
  -4   2   2 453196.  61226.   1
   4  -2  -1  75322.  10188.   1
   4  -2  -1  63626.  13441.   1
  -4  -2   1  69932. 9463.22   1
  -4  -2   1  57691.  12186.   1
   4   2  -1  81890.  11074.   1
   4   2  -1  85402.  15328.   1
   4   2  -1  58041.  12265.   1
  -4   2   1  94720.  12808.   1
   4  -2   0 1203.58 279.293   1
   4  -2   0  740.56 200.305   1
   4  -2   0 2087.06 460.178   1
  -4  -2   0  918.39 237.181   1
   4   2   0 1521.05 284.311   1
   4   2   0 2161.90 512.764   1
   4   2   0 2555.09 567.095   1
  -4   2   0  956.80 233.035   1
  -4   2   0 1581.28 354.134   1
  -4   2   0 1465.85 316.605   1
   4  -2   1 7859.47 1109.32   1
   4  -2   1 6596.11 1430.72   1
  -4  -2  -1 8651.53 1203.58   1
  -4  -2  -1  10303. 3480.25   1
   4   2   1 9596.32 1326.86   1
   4   2   1 7063.05 1315.51   1
   4   2   1 8053.67 2740.56   1
  -4   2  -1 7717.64 1597.64   1
  -4  -2  -2 145865.  48811.   1
   4   2   2 127515.  42679.   1
  -4  -2  -3  19064. 6428.10   1
   4   2   3  13338. 4525.42   1
  -4  -2  -6 4610.51 1568.62   1
   4   2   6 1399.52 1680.12   1
  -4  -4   9  878.03 727.907   1
   4   4  -9 1146.41 755.181   1
  -4  -4   8  26424. 5651.31   1
   4   4  -8  29435. 6288.45   1
  -4  -4   7  41327. 8771.54   1
   4   4  -7  43989. 9325.76   1
  -4  -4   6 4176.30 1040.37   1
   4   4  -6 2214.70 661.357   1
  -4  -4   5  11416. 2526.73   1
  -4  -4   5  27297. 5797.51   1
   4   4  -5  14650. 3128.95   1
   4   4  -5  22933. 4870.17   1
  -4  -4   4 5642.59 2210.34   1
  -4  -4   4 4067.20 1185.25   1
   4   4  -4 3929.74 1605.28   1
   4   4  -4 2795.11 1120.44   1
   4  -4  -3 5978.61 998.690   1
  -4  -4   3 6838.31 1041.02   1
  -4  -4   3 7289.98 2664.19   1
  -4  -4   3  10661. 2273.62   1
   4   4  -3  13011. 2768.93   1
   4   4  -3  11582. 3988.65   1
   4   4  -3 8564.25 1256.60   1
  -4   4   3 7021.59 1090.11   1
   4  -4  -2  86864.  11748.   1
  -4  -4   2  58150.  19507.   1
  -4  -4   2  85446.  11560.   1
  -4  -4   2  61292.  12952.   1
  -4  -4   2  75715.  13598.   1
   4   4  -2  73925.  24765.   1
   4   4  -2  77656.  10504.   1
   4   4  -2  76740.  16212.   1
   4   4  -2  76609.  13764.   1
  -4   4   2  79118.  10703.   1
   4  -4  -1  20524. 2790.75   1
   4  -4  -1  55029.  18420.   1
  -4  -4   1  17757. 2426.36   1
  -4  -4   1  26249. 5561.85   1
  -4  -4   1  53327.  17873.   1
  -4  -4   1  18863. 3421.34   1
   4   4  -1  50425.  16899.   1
   4   4  -1  21290. 3851.19   1
   4   4  -1  25202. 5339.29   1
  -4   4   1  52258.  17495.   1
  -4   4   1  22605. 4117.39   1
   4  -4   0 3362.42 620.772   1
   4  -4   0 1459.96 318.568   1
  -4  -4   0 4010.47 801.221   1
  -4  -4   0 1361.99 415.448   1
   4   4   0 1180.01 658.302   1
  -4   4   0  833.95 383.809   1
   4  -4   1  14351. 1983.20   1
  -4  -4  -1 7320.52 2524.54   1
  -4  -4  -1 9849.43 1809.08   1
  -4  -4  -1  17329. 3680.99   1
  -4  -4  -1  12232. 1677.28   1
   4   4   1 4315.95 1572.55   1
   4   4   1  13736. 1877.81   1
   4   4   1  12963. 2762.38   1
   4   4   1  10489. 1924.07   1
  -4   4  -1  14041. 1941.08   1
   4  -4   2  99411.  13544.   1
  -4  -4  -2  71962.  15208.   1
  -4  -4  -2 145472.  48680.   1
  -4  -4  -2  78966.  14183.   1
   4   4   2 119594.  25267.   1
   4   4   2 136723.  45756.   1
   4   4   2  75256.  13520.   1
   4   4   2  81039.  10999.   1
  -4  -4  -3 147283.  49291.   1
   4   4   3 138468.  46345.   1
  -4  -4  -5  947.85 816.059   1
   4   4   5  218.85 1009.60   1
  -4  -4  -7 3030.76 1705.43   1
   4   4   7 1457.34 1896.35   1
  -4  -4  -8  14521. 3115.86   1
   4   4   8 7964.21 2666.37   1
  -4  -4  -9 -856.64 1109.32   1
  -4  -6  11 -340.39 555.094   1
   4   6 -11  855.12 781.583   1
  -4  -6  10  284.31 678.158   1
   4   6 -10 1110.63 915.338   1
  -4  -6   9 4014.83 1051.49   1
   4   6  -9 5958.97 1468.25   1
  -4  -6   8  18150. 3894.82   1
   4   6  -8  16000. 3443.16   1
  -4  -6   7 7730.74 1731.18   1
   4   6  -7  10092. 2192.88   1
  -4  -6   6 1525.42 1534.36   1
  -4  -6   6 1785.73 584.115   1
   4   6  -6  889.15 1211.87   1
   4   6  -6 1630.81 1938.68   1
   4   6  -6  413.92 391.446   1
  -4  -6   5 5016.36 2082.04   1
  -4  -6   5 8300.23 1797.51   1
   4   6  -5 4641.06 1912.72   1
   4   6  -5 5057.82 1127.86   1
  -4  -6   4  10209. 3753.00   1
  -4  -6   4 3576.26 771.546   1
  -4  -6   4 3809.73 989.307   1
  -4  -6   4 3233.69 749.290   1
   4   6  -4 8082.03 2921.66   1
   4   6  -4 2670.74 802.312   1
   4   6  -4 3907.92 884.136   1
   4   6  -4 4156.66 1059.35   1
   4  -6  -3  29849. 5454.94   1
   4  -6  -3  28300. 3901.37   1
   4  -6  -3  39276.  13162.   1
  -4  -6   3  33842. 4612.69   1
  -4  -6   3  33079. 5991.70   1
  -4  -6   3  36068. 7626.00   1
   4   6  -3  31137. 5657.86   1
   4   6  -3  31050.  10460.   1
   4   6  -3  29740. 4065.02   1
   4   6  -3  35719. 7558.36   1
  -4   6   3  43247.  14490.   1
  -4   6   3  38948. 7167.79   1
  -4   6   3  28453. 3901.37   1
   4  -6  -2  14421. 1977.74   1
   4  -6  -2  16177. 5433.12   1
  -4  -6   2  10753. 3720.27   1
  -4  -6   2  15047. 2067.42   1
  -4  -6   2  15309. 2801.66   1
   4   6  -2  20264. 3685.36   1
   4   6  -2  14109. 4791.62   1
   4   6  -2  17022. 2323.80   1
  -4   6   2  13766. 4636.70   1
  -4   6   2  15739. 2151.21   1
  -4   6   2  23042. 4182.85   1
   4  -6  -1  41043. 5557.49   1
   4  -6  -1  29129. 9757.79   1
   4  -6  -1  32293. 5801.87   1
  -4  -6   1  35217. 4776.34   1
  -4  -6   1  35064. 7416.53   1
  -4  -6   1  31879.  10711.   1
  -4  -6   1  33493. 6046.25   1
   4   6  -1  35239.  11833.   1
   4   6  -1  33537. 6048.43   1
   4   6  -1  33581. 7104.51   1
   4   6  -1  32228. 4374.86   1
  -4   6   1  39363.  13181.   1
  -4   6   1  31726. 5699.32   1
  -4   6   1  37465. 5073.09   1
   4  -6   0  16166. 2917.30   1
   4  -6   0  11630. 1588.26   1
   4  -6   0  35959.  12044.   1
   4  -6   0  12086. 2559.46   1
  -4  -6   0  29151. 9786.16   1
  -4  -6   0  12295. 1685.14   1
  -4  -6   0  16293. 2971.85   1
  -4  -6   0  11669. 2496.18   1
   4   6   0  10908. 1497.27   1
   4   6   0  11272. 2406.72   1
   4   6   0  37050.  12422.   1
   4   6   0  14224. 2600.91   1
  -4   6   0  32948.  11036.   1
  -4   6   0  11279. 2389.26   1
  -4   6   0  14848. 2683.83   1
  -4   6   0  10319. 1408.25   1
   4  -6   1 6369.18 1216.45   1
   4  -6   1 8164.95 1261.84   1
   4  -6   1 6201.17 2154.70   1
   4  -6   1  10199. 2165.17   1
  -4  -6  -1 5910.97 2048.87   1
  -4  -6  -1 6785.94 1485.71   1
  -4  -6  -1 6212.08 1174.34   1
   4   6   1 5439.66 764.782   1
   4   6   1 5976.43 2072.00   1
   4   6   1 4950.90 956.796   1
   4   6   1 6969.23 1532.62   1
  -4   6  -1 5245.47 1848.79   1
  -4   6  -1 3936.28 834.387   1
  -4   6  -1 6842.67 1263.58   1
  -4   6  -1 8092.94 1721.80   1
   4  -6   2  14855. 5029.45  -1
   4  -6   2 7451.44 1906.17  -1
   4  -6   2  13840. 2950.03  -1
  -4  -6  -2 9306.12 1368.53  -1
  -4  -6  -2  12682. 4298.49  -1
  -4  -6  -2  11407. 2452.54  -1
  -4  -6  -2 6884.13 1300.89  -1
   4   6   2  10609. 2295.44  -1
   4   6   2  19485. 6565.56  -1
   4   6   2 8769.36 1623.17  -1
   4   6   2 9327.94 1303.95  -1
  -4   6  -2  12520. 4248.30  -1
  -4   6  -2  11307. 2417.63  -1
  -4  -6  -3  17779. 5996.07   1
  -4  -6  -3  22540. 4089.02   1
   4   6   3  21460. 7222.34   1
   4   6   3  21122. 3838.09   1
  -4  -6  -4  54724.  18350.   1
  -4  -6  -4  35261. 6373.55   1
   4   6   4  56491.  18935.   1
   4   6   4  33930. 6133.53   1
  -4  -6  -5  48483.  16267.   1
  -4  -6  -5  14408. 2742.74   1
   4   6   5  47829.  16046.   1
   4   6   5  14488. 2764.56   1
  -4  -6  -6 9216.66 3205.32   1
  -4  -6  -6  -15.61 820.859   1
   4   6   6 8642.80 3002.40   1
   4   6   6 1573.20 1059.35   1
  -4  -6  -7 -317.26 859.262   1
   4   6   7 -2376.2 1511.02   1
  -4  -6  -8 2000.65 982.325   1
   4   6   8 5448.39 2031.64   1
  -4  -6  -9 1224.09 1102.12   1
   4   6   9  717.65 1954.83   1
  -4  -6 -10 1236.31 1243.73   1
   4   6  10 -1610.1 2070.91   1
  -4  -6 -11 -221.69 825.005  -1
   4   6  11  298.49 1131.57  -1
  -4  -8  14 -266.86 523.238   1
  -4  -8  13 1215.80 629.718   1
   4   8 -13 2576.91 1176.74   1
  -4  -8  12 -344.75 550.512   1
   4   8 -12 -433.12 869.735   1
  -4  -8  11 1047.13 624.699   1
   4   8 -11  182.91 837.224   1
  -4  -8  10  578.88 521.710   1
   4   8 -10 1129.61 667.248   1
  -4  -8   9 1218.63 610.516   1
   4   8  -9  290.20 542.657   1
  -4  -8   8  406.07 1902.46   1
  -4  -8   8 1361.33 532.838   1
   4   8  -8  245.25 2812.57   1
   4   8  -8 2119.57 688.849   1
  -4  -8   7 4265.76 1842.24  -1
  -4  -8   7 4027.93 2064.80  -1
  -4  -8   7  915.99 431.595  -1
   4   8  -7  491.82 1560.33  -1
   4   8  -7  718.09 429.849  -1
   4   8  -7 3368.97 2487.45  -1
   4  -8  -6  11591. 2509.27   1
  -4  -8   6  13727. 2771.11   1
  -4  -8   6  17070. 5978.61   1
  -4  -8   6  11719. 2515.82   1
   4   8  -6 8341.69 1814.75   1
   4   8  -6  17705. 6120.44   1
  -4   8   6  10971. 2734.01   1
   4  -8  -5 6054.98 1626.01  -1
   4  -8  -5  10722. 3665.72  -1
  -4  -8   5 9893.07 3615.53  -1
  -4  -8   5 8442.06 1825.88  -1
  -4  -8   5 6548.11 1484.62  -1
   4   8  -5  14877. 5138.55  -1
   4   8  -5  12034. 2583.46  -1
   4   8  -5 8099.49 1796.42  -1
  -4   8   5 4156.66 2054.33  -1
   4  -8  -4 2869.30 910.974   1
   4  -8  -4 5513.85 1958.76   1
  -4  -8   4 2317.26 1575.17   1
  -4  -8   4 3214.05 959.414   1
  -4  -8   4 4453.41 989.744   1
  -4  -8   4 4464.32 880.863   1
   4   8  -4 7355.44 2727.47   1
   4   8  -4 3907.92 888.936   1
   4   8  -4 3862.10 885.445   1
   4   8  -4 4311.58 1138.55   1
  -4   8   4 5644.77 2031.85   1
  -4   8   4 4078.11 1252.02   1
   4  -8  -3  29173. 4032.29   1
   4  -8  -3  61684.  20655.   1
   4  -8  -3  37639. 6796.85   1
  -4  -8   3  32315. 4409.77   1
  -4  -8   3  40585. 8581.71   1
  -4  -8   3  51211.  17209.   1
  -4  -8   3  35872. 6493.56   1
   4   8  -3  32206. 5838.96   1
   4   8  -3  48134.  16164.   1
   4   8  -3  39036. 8263.14   1
   4   8  -3  37312. 5084.00   1
  -4   8   3  71241.  23849.   1
  -4   8   3  45145. 8140.95   1
   4  -8  -2 6253.54 891.773   1
   4  -8  -2  12470. 4200.30   1
  -4  -8   2 9203.57 3244.60   1
  -4  -8   2 6227.36 900.937   1
  -4  -8   2 6729.21 1334.50   1
  -4  -8   2  10155. 2181.97   1
   4   8  -2 8743.17 1893.74   1
   4   8  -2 9050.83 3152.95   1
   4   8  -2 7879.11 1530.00   1
   4   8  -2 5210.56 752.345   1
  -4   8   2 8479.15 2888.93   1
  -4   8   2 8516.25 1579.75   1
   4  -8  -1  20367. 3674.45   1
   4  -8  -1  26206. 3552.25   1
   4  -8  -1  27166. 9103.20   1
   4  -8  -1  27231. 5762.60   1
  -4  -8   1  24656. 3351.51   1
  -4  -8   1  21842. 4636.70   1
  -4  -8   1  27144. 9138.11   1
  -4  -8   1  28431. 5142.91   1
   4   8  -1  22038. 7438.35   1
   4   8  -1  24373. 4420.68   1
   4   8  -1  28649. 6068.07   1
  -4   8   1  22496. 7545.27   1
  -4   8   1  22583. 4782.89   1
  -4   8   1  26969. 4852.71   1
  -4   8   1  22103. 3000.22   1
   4  -8   0 1419.37 651.319   1
  -4  -8   0 6991.05 1308.53   1
  -4  -8   0 1417.41 821.732   1
  -4  -8   0 2675.10 681.431   1
   4   8   0 4329.04 619.681   1
   4   8   0 2047.78 1037.09   1
   4   8   0 4852.71 1085.97   1
   4   8   0 3886.10 778.747   1
  -4   8   0 2059.78 886.536   1
  -4   8   0 3539.16 779.620   1
  -4   8   0 4368.31 821.513   1
  -4   8   0 3556.62 500.327   1
   4  -8   1 3580.62 742.308   1
   4  -8   1 4750.16 865.371   1
   4  -8   1 6249.18 1336.02   1
  -4  -8  -1 4093.38 825.005   1
  -4  -8  -1 5895.70 827.187   1
  -4  -8  -1 2051.27 827.187   1
  -4  -8  -1 3814.09 907.701   1
   4   8   1 4706.52 667.030   1
   4   8   1 6129.17 1375.95   1
   4   8   1 3050.40 655.029   1
   4   8   1 2155.79 917.084   1
  -4   8  -1 1133.32 783.547   1
  -4   8  -1 3689.72 810.385   1
  -4   8  -1 3397.33 718.524   1
  -4   8  -1 7992.57 1398.65   1
   4  -8   2  34170. 6172.81   1
   4  -8   2  53175.  17844.   1
   4  -8   2  43705. 9238.48   1
  -4  -8  -2  35217. 6351.73   1
  -4  -8  -2  39385. 5356.75   1
  -4  -8  -2  51211.  17155.   1
  -4  -8  -2  51626.  10925.   1
   4   8   2  38708. 5247.65   1
   4   8   2  39057. 8280.59   1
   4   8   2  47174. 8490.06   1
   4   8   2  73620.  24656.   1
  -4   8  -2  64826.  21726.   1
  -4   8  -2  39297. 8304.60   1
  -4   8  -2  37072. 6698.66   1
   4  -8   3 108553.  36352.   1
   4  -8   3 143705.  25813.   1
   4  -8   3  92276.  19492.   1
  -4  -8  -3 127100.  22823.   1
  -4  -8  -3 103731.  34715.   1
  -4  -8  -3  82850.  17508.   1
   4   8   3 106546.  22518.   1
   4   8   3 103273.  34584.   1
   4   8   3 123522.  22169.   1
  -4   8  -3  95963.  32140.   1
  -4   8  -3  97687.  20635.   1
  -4   8  -3 119703.  21586.   1
   4  -8   4 113135.  37901.   1
   4  -8   4 163408.  34519.   1
  -4  -8  -4  91665.  30700.   1
  -4   8  -4 124940.  26402.   1
   4  -8   5  854.46 557.495   1
  -4  -8  -5 4189.39 1552.47   1
  -4  -8  -5  905.74 598.734   1
   4   8   5 6729.21 2380.53   1
   4   8   5  648.92 662.448   1
  -4   8  -5 1794.24 665.284   1
  -4  -8  -6  16531. 5581.49   1
  -4  -8  -6 7756.92 1577.35   1
   4   8   6  13618. 4614.88   1
   4   8   6 8869.73 1828.71   1
  -4  -8  -7 1288.46 817.368   1
  -4  -8  -7  717.22 683.176   1
   4   8   7 3283.87 1360.90   1
   4   8   7 -1110.6 982.980   1
  -4  -8  -8 1993.45 950.905  -1
  -4  -8  -8 2032.95 878.899  -1
   4   8   8 2782.02 1165.39  -1
   4   8   8  931.05 1503.82  -1
  -4  -8  -9 3447.52 1027.71   1
   4   8   9  158.61 1447.30   1
  -4  -8 -10  543.09 741.217   1
   4   8  10 -286.49 1253.98   1
  -4  -8 -11 1091.42 881.518  -1
   4   8  11    2.90 1302.20  -1
  -4  -8 -12  328.39 843.988  -1
   4   8  12 1068.29 1341.26  -1
  -4  -8 -13 1014.84 845.515   1
   4   8  13 -1065.7 1317.91   1
  -4  -8 -14  242.20 723.325   1
  -4 -10  14 -286.71 574.732   1
   4  10 -14  236.96 1027.49   1
  -4 -10  13 -367.66 571.459   1
   4  10 -13  -32.95 981.016   1
  -4 -10  12  785.51 659.611   1
   4  10 -12  616.19 955.923   1
  -4 -10  11  773.29 535.675   1
   4  10 -11  733.14 726.379   1
  -4 -10  10  182.72 549.421   1
   4  10 -10  530.22 780.711   1
   4 -10  -9 2504.91 934.540   1
  -4 -10   9  905.52 1188.74   1
  -4 -10   9 3735.54 987.562   1
   4  10  -9 1491.82 1190.27   1
   4  10  -9 2919.48 1709.80   1
   4  10  -9 5302.20 1328.17   1
   4 -10  -8 -793.58 1099.93   1
  -4 -10   8 1871.92 1585.42   1
  -4 -10   8  438.80 1384.46   1
  -4 -10   8 1427.67 555.094   1
   4  10  -8 2638.01 783.329   1
   4  10  -8 1254.20 1267.29   1
   4  10  -8 2070.69 2212.52   1
  -4  10   8 1097.53 1397.99   1
   4 -10  -7  688.41 1126.34   1
  -4 -10   7 -484.18 1105.39   1
  -4 -10   7 1067.86 1663.54   1
  -4 -10   7 1957.23 595.025   1
   4  10  -7 1534.36 555.094   1
   4  10  -7 1315.08 1461.92   1
   4  10  -7  998.04 1427.88   1
  -4  10   7 -1322.3 1845.51   1
   4 -10  -6 1114.33 691.468   1
   4 -10  -6 1527.38 854.025   1
  -4 -10   6 1797.07 1704.78   1
  -4 -10   6  770.67 927.557   1
  -4 -10   6  775.26 377.263   1
   4  10  -6  910.32 1066.33   1
   4  10  -6  406.94 1317.69   1
   4  10  -6  874.10 422.867   1
  -4  10   6  839.62 704.341   1
  -4  10   6  617.50 1168.67   1
   4 -10  -5 -126.42 617.062   1
   4 -10  -5  479.38 541.348   1
  -4 -10   5  415.23 301.985   1
  -4 -10   5 2930.39 1940.21   1
  -4 -10   5  275.15 855.989   1
   4  10  -5  608.33 361.553   1
   4  10  -5  614.88 1223.43   1
   4  10  -5   36.85 916.211   1
  -4  10   5 2461.27 1030.55   1
  -4  10   5 -163.98 806.021   1
   4 -10  -4 5858.60 2035.13   1
   4 -10  -4 3862.10 871.481   1
  -4 -10   4 1176.30 665.720   1
  -4 -10   4 9971.62 3663.54   1
  -4 -10   4 1215.36 847.915   1
  -4 -10   4 3521.71 828.714   1
   4  10  -4 1150.99 834.823   1
   4  10  -4 7156.88 2675.10   1
   4  10  -4 3606.80 883.045   1
   4  10  -4  729.22 634.082   1
  -4  10   4 8751.90 2995.85   1
  -4  10   4 1607.46 619.244   1
   4 -10  -3 6100.80 2099.06   1
   4 -10  -3 8086.40 1516.04   1
  -4 -10   3 5900.06 911.193   1
  -4 -10   3 4294.13 1912.72   1
  -4 -10   3 6013.52 1313.77   1
  -4 -10   3 5681.86 1192.67   1
   4  10  -3 5723.32 1214.05   1
   4  10  -3 9493.77 3414.79   1
   4  10  -3 6061.53 922.757   1
   4  10  -3 5878.24 1316.82   1
  -4  10   3 6159.71 2163.43   1
   4 -10  -2  27253. 4915.99   1
   4 -10  -2  26926. 9035.56   1
   4 -10  -2  22845. 3115.86   1
   4 -10  -2  30984. 6559.02   1
  -4 -10   2  21586. 2947.85   1
  -4 -10   2  22802. 4837.44   1
  -4 -10   2  23129. 7846.38   1
  -4 -10   2  23631. 4309.40   1
   4  10  -2  26184. 8869.73   1
   4  10  -2  22562. 3074.40   1
   4  10  -2  27144. 5762.60   1
   4  10  -2  19921. 3643.90   1
  -4  10   2  31791.  10674.   1
  -4  10   2  27471. 4957.45   1
  -4  10   2  23827. 3246.78   1
   4 -10  -1  19640. 6593.93   1
   4 -10  -1  16943. 3070.04   1
   4 -10  -1  20703. 4396.68   1
   4 -10  -1  18023. 2448.18   1
  -4 -10   1  23129. 7820.20   1
  -4 -10   1  14632. 2000.00   1
  -4 -10   1  19435. 3543.53   1
  -4 -10   1  17043. 3628.62   1
   4  10  -1  16317. 3475.89   1
   4  10  -1  19963. 3641.72   1
   4  10  -1  21366. 7235.43   1
   4  10  -1  18108. 2470.00   1
  -4  10   1  18296. 3312.24   1
  -4  10   1  22387. 7532.18   1
  -4  10   1  18804. 2552.91   1
  -4  10   1  16018. 3419.15   1
   4 -10   0  20100. 3626.44   1
   4 -10   0  17497. 2376.17   1
   4 -10   0  18964. 6377.91   1
   4 -10   0  17408. 3691.90   1
  -4 -10   0  20864. 7036.87   1
  -4 -10   0  19439. 2644.55   1
  -4 -10   0  21108. 3825.00   1
  -4 -10   0  15712. 3353.70   1
   4  10   0  22213. 4719.61   1
   4  10   0  16077. 2930.39   1
   4  10   0  15324. 5210.56   1
   4  10   0  18861. 2566.00   1
  -4  10   0  15523. 2810.38   1
  -4  10   0  15237. 5156.01   1
  -4  10   0  17218. 2336.89   1
  -4  10   0  21623. 4577.78   1
   4 -10   1 4843.98 979.270   1
   4 -10   1 4793.80 855.989   1
   4 -10   1 4643.24 1702.59   1
   4 -10   1 4835.26 1056.29   1
  -4 -10  -1 5356.75 1892.43   1
  -4 -10  -1 5180.01 728.343   1
  -4 -10  -1 4944.35 995.199   1
  -4 -10  -1 4505.78 1049.97   1
   4  10   1 3061.31 825.877   1
   4  10   1 4955.26 1822.60   1
   4  10   1 3360.24 492.035   1
   4  10   1 6589.56 1261.62   1
  -4  10  -1 2435.08 1132.01   1
  -4  10  -1 3923.19 884.573   1
  -4  10  -1 4165.39 864.498   1
   4 -10   2 8998.46 1751.47   1
   4 -10   2 4224.30 1704.78   1
   4 -10   2 5422.21 1181.76   1
  -4 -10  -2 6888.49 1330.57   1
  -4 -10  -2 4130.48 1513.42   1
  -4 -10  -2 6393.19 918.175   1
   4  10   2 4865.80 1828.71   1
   4  10   2 6587.38 925.594   1
   4  10   2 3936.28 1043.64   1
   4  10   2  11237. 2087.28   1
  -4  10  -2 3032.94 1375.08   1
  -4  10  -2 5686.23 1234.78   1
   4 -10   3  43770. 7911.84   1
   4 -10   3  45494.  15322.   1
   4 -10   3  33013. 6982.32   1
  -4 -10  -3  45254. 8151.86   1
  -4 -10  -3  61139.  20487.   1
  -4 -10  -3  44447. 9410.86   1
   4  10   3  39603. 8420.24   1
   4  10   3  55968.  18765.   1
   4  10   3  34912. 6299.36   1
  -4  10  -3  60419.  20288.   1
  -4  10  -3  45734. 9666.15   1
  -4  10  -3  53262. 9618.14   1
   4 -10   4  62688.  11383.   1
   4 -10   4  43509.  14648.   1
   4 -10   4  43749. 9253.75   1
  -4 -10  -4  47152. 8490.06   1
  -4 -10  -4  40999.  13753.   1
  -4 -10  -4  35108. 7447.08   1
   4  10   4  42483.  14253.   1
   4  10   4  45189. 8140.95   1
  -4  10  -4  40868.  13753.   1
  -4  10  -4  42461. 8985.37   1
  -4  10  -4  41283. 7693.64   1
   4 -10   5  48418.  16291.   1
   4 -10   5  38774. 8212.95   1
  -4 -10  -5  41916.  14050.   1
  -4 -10  -5  33319. 6015.70   1
   4  10   5  45734.  15339.   1
   4  10   5  32228. 5825.87   1
  -4  10  -5  41065.  13825.   1
  -4  10  -5  40803. 8638.44   1
   4 -10   6  13548. 2919.48   1
  -4 -10  -6  11420. 3886.10   1
  -4 -10  -6 4780.71 1052.37   1
   4  10   6  12745. 4333.40   1
   4  10   6 6362.64 1329.91   1
  -4  10  -6 8727.90 1985.60   1
   4 -10   7 -530.44 526.947   1
  -4 -10  -7 -536.33 613.353   1
  -4 -10  -7  837.44 575.823   1
   4  10   7  781.15 699.105   1
   4  10   7  746.89 714.815   1
  -4  10  -7  623.39 646.956   1
  -4 -10  -8 2208.16 948.504   1
  -4 -10  -8  992.80 692.559   1
   4  10   8  941.30 689.722   1
   4  10   8 1155.57 924.066   1
  -4 -10  -9  504.25 636.918   1
  -4 -10  -9  672.05 769.582   1
   4  10   9  181.91 585.860   1
   4  10   9  859.26 1131.14   1
  -4 -10 -10  732.05 623.390   1
  -4 -10 -10 1293.91 853.370   1
   4  10  10 -1457.3 1298.27   1
  -4 -10 -11 -474.80 714.597   1
   4  10  11  162.36 1352.39   1
  -4 -10 -12  -49.81 712.197   1
   4  10  12  656.56 1157.97   1
  -4 -10 -13 -196.05 727.252  -1
   4  10  13  564.91 1045.17  -1
  -4 -12  13  447.74 621.426   1
   4  12 -13 -1299.1 820.859   1
   4 -12 -12  677.28 761.727  -1
  -4 -12  12 1798.82 730.743  -1
   4  12 -12  909.23 817.586  -1
   4 -12 -11  535.24 868.862   1
  -4 -12  11  476.98 550.730   1
   4  12 -11  701.72 881.081   1
   4  12 -11  808.64 752.127   1
  -4  12  11 -1296.7 904.210   1
   4 -12 -10  576.26 885.227   1
  -4 -12  10  549.20 913.156   1
  -4 -12  10  798.60 549.858   1
  -4 -12  10  133.17 1073.97   1
   4  12 -10  799.48 974.688   1
   4  12 -10 1724.20 800.566   1
   4  12 -10 -419.16 1016.80   1
  -4  12  10  370.72 1058.26   1
   4 -12  -9 2766.74 1087.71   1
  -4 -12   9 1064.37 1076.59   1
  -4 -12   9 1820.86 1256.82   1
  -4 -12   9 1862.10 607.680   1
   4  12  -9 2494.00 803.403   1
   4  12  -9 1957.45 1201.61   1
   4  12  -9 -861.88 1213.61   1
  -4  12   9   95.20 1141.17   1
   4 -12  -8 3462.79 1273.62   1
   4 -12  -8 1225.18 912.502   1
  -4 -12   8 2435.08 1346.06   1
  -4 -12   8 1140.52 878.027   1
  -4 -12   8 3268.60 847.043   1
   4  12  -8 2773.29 1297.84   1
   4  12  -8 1953.74 659.175   1
   4  12  -8 2400.17 1147.94   1
  -4  12   8 3102.77 1214.49   1
  -4  12   8 -911.63 1199.43   1
   4 -12  -7 4078.11 1063.06   1
   4 -12  -7 2417.63 950.250   1
  -4 -12   7 1682.30 1377.04   1
  -4 -12   7 2622.73 727.907   1
  -4 -12   7 1538.51 1145.75   1
   4  12  -7 2906.39 1366.35   1
   4  12  -7 2915.12 788.784   1
   4  12  -7 2686.01 1159.50   1
  -4  12   7 2668.55 1055.64   1
  -4  12   7 1688.41 911.193   1
   4 -12  -6  962.69 547.894   1
   4 -12  -6  470.43 646.301   1
  -4 -12   6  989.53 1600.04   1
  -4 -12   6  284.53 878.463   1
  -4 -12   6  746.45 389.264   1
   4  12  -6  115.32 1000.22   1
   4  12  -6  480.03 440.977   1
   4  12  -6 1034.47 945.231   1
  -4  12   6 1191.36 655.247   1
  -4  12   6  825.88 687.322   1
   4 -12  -5 2210.34 882.391   1
   4 -12  -5 1906.83 655.683   1
  -4 -12   5 1757.58 1487.23   1
  -4 -12   5  318.13 912.938   1
  -4 -12   5 2205.98 591.315   1
   4  12  -5  543.31 1018.98   1
   4  12  -5 1801.44 1136.37   1
   4  12  -5 2598.73 712.197   1
   4  12  -5  876.06 656.338   1
  -4  12   5 1986.25 859.480   1
  -4  12   5 1258.78 561.858   1
   4 -12  -4  354.79 457.124   1
   4 -12  -4  437.49 385.773   1
  -4 -12   4  606.15 350.862   1
  -4 -12   4 -699.98 743.617   1
  -4 -12   4 -1480.0 1400.17   1
  -4 -12   4  664.85 675.321   1
   4  12  -4 -507.53 920.139   1
   4  12  -4  -84.99 594.370   1
   4  12  -4  781.80 465.633   1
   4  12  -4  317.48 632.554   1
  -4  12   4  728.78 521.928   1
  -4  12   4  526.29 435.959   1
   4 -12  -3 2518.00 640.191   1
   4 -12  -3 3859.91 1370.28   1
  -4 -12   3 3342.79 642.155   1
  -4 -12   3 2646.74 662.666   1
  -4 -12   3 2668.55 1392.97   1
  -4 -12   3 2989.31 842.242   1
   4  12  -3 2596.55 733.798   1
   4  12  -3 2557.27 1257.47   1
   4  12  -3 2792.93 828.059   1
   4  12  -3 2655.46 518.001   1
  -4  12   3 2513.63 975.561   1
  -4  12   3 3427.88 756.927   1
   4 -12  -2 4671.61 931.703   1
   4 -12  -2 5751.69 843.115   1
   4 -12  -2 7316.16 2500.54   1
   4 -12  -2 5147.28 1174.34   1
  -4 -12   2 5509.49 803.621   1
  -4 -12   2 5732.05 1272.96   1
  -4 -12   2 7898.75 2851.84   1
  -4 -12   2 4233.03 926.903   1
   4  12  -2 9430.49 3296.96   1
   4  12  -2 5406.93 783.111   1
   4  12  -2 4841.80 1048.00   1
   4  12  -2 5092.73 1179.36   1
  -4  12   2  11680. 3971.19   1
  -4  12   2 3002.40 879.990   1
  -4  12   2 4411.95 875.190   1
  -4  12   2 6028.80 894.391   1
   4 -12  -1  11650. 1586.08   1
   4 -12  -1  12697. 4283.22   1
   4 -12  -1  12241. 2631.46   1
   4 -12  -1  10980. 2017.02   1
  -4 -12   1  11728. 1607.90   1
  -4 -12   1  12099. 2249.62   1
  -4 -12   1 9790.52 2114.55   1
  -4 -12   1  13709. 4689.06   1
   4  12  -1  12948. 4429.41   1
   4  12  -1  12933. 1773.95   1
   4  12  -1  13205. 2439.45   1
   4  12  -1  10511. 2267.07   1
  -4  12   1  13740. 4665.06   1
  -4  12   1  12625. 2729.65   1
  -4  12   1 9799.25 1800.78   1
  -4  12   1  10799. 1471.09   1
   4 -12   0  11549. 3914.46   1
   4 -12   0 8134.40 1500.11   1
   4 -12   0 7279.07 1586.30   1
   4 -12   0 7826.74 1078.55   1
  -4 -12   0 9530.87 3279.51   1
  -4 -12   0 8149.68 1124.37   1
  -4 -12   0 9201.39 1706.74   1
  -4 -12   0 6875.40 1532.84   1
   4  12   0 8725.72 1204.23   1
   4  12   0 7089.24 1575.39   1
   4  12   0 7916.20 1477.20   1
   4  12   0 9155.57 3170.41   1
  -4  12   0 6471.74 2284.53   1
  -4  12   0 8018.76 1480.69   1
  -4  12   0 7591.09 1641.28   1
  -4  12   0 7191.79 982.325   1
   4 -12   1 1584.11 507.091   1
   4 -12   1  774.60 709.578   1
   4 -12   1 1788.56 469.343   1
  -4 -12  -1 2280.16 343.225   1
  -4 -12  -1 1728.12 769.364   1
  -4 -12  -1 2437.27 578.441   1
  -4 -12  -1 1209.90 515.164   1
   4  12   1 1638.88 852.934   1
   4  12   1 1820.64 684.922   1
   4  12   1 1701.50 270.128   1
   4  12   1 1991.71 520.837   1
  -4  12  -1 1843.11 1067.20   1
  -4  12  -1 2056.51 576.696   1
  -4  12  -1 2705.65 586.951   1
  -4  12  -1 1873.23 507.309   1
   4 -12   2 2552.91 699.323   1
   4 -12   2 3870.82 1567.97   1
   4 -12   2 1874.10 479.816   1
  -4 -12  -2 1331.66 479.162   1
  -4 -12  -2 1239.80 537.202   1
  -4 -12  -2 1577.79 313.986   1
  -4 -12  -2 2594.37 1039.71   1
   4  12   2 1433.34 281.038   1
   4  12   2 2662.01 1112.81   1
   4  12   2 2624.92 874.317   1
   4  12   2 1357.19 438.795   1
  -4  12  -2 2720.92 1258.56   1
  -4  12  -2 3043.85 817.150   1
  -4  12  -2 2574.73 648.701   1
   4 -12   3 1507.53 898.974   1
   4 -12   3 2249.62 1296.97   1
   4 -12   3 3689.72 845.515   1
  -4 -12  -3 3617.71 814.095   1
  -4 -12  -3 3294.78 873.881   1
  -4 -12  -3 5873.88 2063.93   1
   4  12   3 4104.29 1536.33   1
   4  12   3 2845.29 985.162   1
  -4  12  -3 3925.37 1667.68   1
  -4  12  -3 1522.36 1039.71   1
  -4  12  -3 5243.29 1162.99   1
   4 -12   4 3043.85 1118.48   1
   4 -12   4 6133.53 2463.45   1
   4 -12   4 5033.82 1122.84   1
  -4 -12  -4 5616.40 1163.65   1
  -4 -12  -4 6995.41 2404.54   1
  -4 -12  -4 3951.56 996.944   1
   4  12   4 4486.14 1354.35   1
   4  12   4 3907.92 1439.89   1
   4  12   4 2411.08 684.922   1
  -4  12  -4 3037.31 1446.65   1
  -4  12  -4 4992.36 1119.35   1
  -4  12  -4 2930.39 1218.41   1
   4 -12   5  664.41 1207.94   1
   4 -12   5 -1223.9 1207.72   1
   4 -12   5  269.91 365.917   1
  -4 -12  -5 -500.98 1236.96   1
  -4 -12  -5   26.95 485.708   1
  -4 -12  -5  443.60 516.473   1
   4  12   5  639.76 586.515   1
   4  12   5  -46.89 233.253   1
   4  12   5 1003.05 576.260   1
  -4  12  -5 1994.54 1221.91   1
  -4  12  -5  702.16 488.326   1
  -4  12  -5  495.09 1466.07   1
   4 -12   6 -297.18 963.124  -1
   4 -12   6  406.50 1048.88  -1
   4 -12   6  189.44 427.449  -1
  -4 -12  -6  101.16 501.854  -1
  -4 -12  -6  534.58 518.874  -1
   4  12   6  695.61 609.425  -1
   4  12   6  227.14 537.857  -1
  -4  12  -6  192.82 1042.98  -1
  -4  12  -6  -29.87 449.487  -1
  -4  12  -6 1257.04 1427.45  -1
   4 -12   7  626.88 488.326   1
  -4 -12  -7  141.35 524.547   1
  -4 -12  -7  892.86 635.391   1
   4  12   7 -368.10 544.403   1
   4  12   7  202.60 660.702   1
  -4  12  -7 -323.81 818.459   1
  -4  12  -7  353.70 525.638   1
   4 -12   8 2048.22 673.794   1
  -4 -12  -8 1311.80 702.159   1
  -4 -12  -8  785.07 704.996   1
   4  12   8 2036.44 904.865   1
   4  12   8   75.61 838.096   1
  -4  12  -8 1177.61 786.165   1
   4 -12   9 1163.21 637.355   1
  -4 -12  -9  972.94 788.566   1
  -4 -12  -9  657.43 579.532   1
   4  12   9  838.10 710.233   1
   4  12   9 -595.02 1079.64   1
  -4  12  -9  360.68 786.384   1
   4 -12  10 -220.16 543.312   1
  -4 -12 -10  794.02 666.157   1
  -4 -12 -10  206.74 684.704   1
   4  12  10  480.25 646.301   1
   4  12  10 1151.43 1007.42   1
  -4 -12 -11 1172.81 665.502   1
  -4 -12 -11 -183.44 660.484   1
   4  12  11  303.73 559.022   1
   4  12  11  386.65 1058.48   1
  -4 -14  11 -1125.0 874.972   1
  -4 -14  11 -295.88 613.135   1
   4  14 -11  181.65 619.026   1
   4  14 -11  558.80 648.265   1
   4 -14 -10  579.97 731.180   1
   4 -14 -10   13.00 432.249   1
  -4 -14  10  852.72 826.096   1
  -4 -14  10   50.71 510.364   1
  -4 -14  10  -12.50 852.279   1
   4  14 -10  510.58 736.853   1
   4  14 -10  710.45 648.046   1
   4  14 -10 1034.47 858.607   1
  -4  14  10 -1872.8 972.724   1
   4 -14  -9  305.04 700.196   1
   4 -14  -9 1718.52 726.816   1
  -4 -14   9  -86.67 862.316   1
  -4 -14   9  653.07 563.168   1
  -4 -14   9  576.04 809.949   1
   4  14  -9  885.66 729.871   1
   4  14  -9  527.82 636.046   1
   4  14  -9 -815.62 919.702   1
  -4  14   9 1340.82 715.469   1
  -4  14   9  837.44 908.792   1
   4 -14  -8 1684.05 795.112  -1
   4 -14  -8  -35.22 484.835  -1
  -4 -14   8  531.09 1050.40  -1
  -4 -14   8 -437.49 863.844  -1
  -4 -14   8  249.40 492.472  -1
   4  14  -8 1090.55 984.507  -1
   4  14  -8 -283.00 535.893  -1
   4  14  -8 -1490.3 936.940  -1
  -4  14   8  615.32 622.299  -1
  -4  14   8  794.02 815.840  -1
   4 -14  -7 1048.00 787.038   1
   4 -14  -7 1156.66 621.208   1
  -4 -14   7 1110.63 1210.34   1
  -4 -14   7 2895.48 1077.90   1
  -4 -14   7 1346.50 532.838   1
   4  14  -7 2051.49 1042.33   1
   4  14  -7 1055.42 567.313   1
   4  14  -7 -204.43 812.786   1
  -4  14   7 1872.13 869.081   1
  -4  14   7 1702.38 838.969   1
   4 -14  -6 1002.18 612.262   1
   4 -14  -6  608.12 521.492   1
  -4 -14   6 1412.39 516.037   1
  -4 -14   6  602.66 776.128   1
  -4 -14   6 -173.42 1222.78   1
   4  14  -6  963.56 921.666   1
   4  14  -6 1028.15 550.949   1
   4  14  -6  644.34 802.748   1
  -4  14   6  933.01 624.263   1
  -4  14   6  546.37 609.207   1
   4 -14  -5 -442.07 529.129  -1
   4 -14  -5 -186.28 391.010  -1
  -4 -14   5 -274.27 972.070  -1
  -4 -14   5 -612.04 384.246  -1
  -4 -14   5  177.33 839.842  -1
   4  14  -5   21.41 820.859  -1
   4  14  -5  877.37 627.318  -1
   4  14  -5  731.83 505.564  -1
   4  14  -5 -759.76 817.368  -1
  -4  14   5 1442.07 697.359  -1
  -4  14   5  111.50 481.125  -1
   4 -14  -4  765.00 509.273   1
   4 -14  -4 1481.56 679.249   1
  -4 -14   4  604.63 626.227   1
  -4 -14   4  168.19 1009.16   1
  -4 -14   4  289.55 794.021   1
  -4 -14   4  512.98 339.952   1
   4  14  -4  242.20 497.490   1
   4  14  -4 1679.47 944.140   1
   4  14  -4  966.18 749.727   1
   4  14  -4 1363.52 501.636   1
  -4  14   4 1799.04 818.677   1
  -4  14   4  763.47 455.160   1
   4 -14  -3  471.52 497.272   1
   4 -14  -3  882.83 497.708   1
   4 -14  -3  -72.38 405.193   1
  -4 -14   3 1151.65 454.069   1
  -4 -14   3  406.94 859.480   1
  -4 -14   3  114.95 701.941   1
  -4 -14   3  976.43 417.412   1
   4  14  -3  561.86 530.002   1
   4  14  -3  990.83 682.740   1
   4  14  -3  733.80 861.225   1
   4  14  -3   77.59 337.551   1
  -4  14   3  754.74 632.773   1
  -4  14   3  617.28 409.557   1
  -4  14   3  366.35 621.863   1
   4 -14  -2  714.60 448.614  -1
   4 -14  -2 1719.83 361.990  -1
   4 -14  -2 3432.25 1243.73  -1
   4 -14  -2 3462.79 872.790  -1
  -4 -14   2 1679.90 360.462  -1
  -4 -14   2 2174.56 596.115  -1
  -4 -14   2 1962.69 1066.99  -1
  -4 -14   2  906.83 519.310  -1
   4  14  -2 1525.64 979.270  -1
   4  14  -2  983.20 274.711  -1
   4  14  -2  626.66 520.183  -1
   4  14  -2 1478.94 570.805  -1
  -4  14   2 2860.57 1118.70  -1
  -4  14   2 1395.37 708.705  -1
  -4  14   2 1553.78 461.269  -1
  -4  14   2  925.38 299.585  -1
   4 -14  -1 4870.17 669.430   1
   4 -14  -1 5760.41 1986.25   1
   4 -14  -1 6179.35 1389.05   1
   4 -14  -1 4560.33 958.323   1
  -4 -14   1 5651.31 802.312   1
  -4 -14   1 5694.95 1150.12   1
  -4 -14   1 4025.74 954.396   1
  -4 -14   1 4726.16 1773.29   1
   4  14  -1 8647.17 3037.31   1
   4  14  -1 5762.60 821.513   1
   4  14  -1 5568.40 1098.84   1
   4  14  -1 4446.86 1064.80   1
  -4  14   1 5786.60 2039.27   1
  -4  14   1 4357.40 1075.28   1
  -4  14   1 5238.92 1009.60   1
  -4  14   1 5134.19 705.214   1
   4 -14   0 3445.34 1279.07   1
   4 -14   0 3397.33 690.595   1
   4 -14   0 3292.60 804.930   1
  -4 -14   0 2404.54 562.295   1
  -4 -14   0 2963.12 439.886   1
  -4 -14   0 1405.41 803.621   1
  -4 -14   0 2681.65 733.362   1
   4  14   0 3277.33 477.416   1
   4  14   0 3478.07 890.900   1
   4  14   0 4045.38 816.931   1
   4  14   0 3931.92 1500.11   1
  -4  14   0 2581.28 1090.77   1
  -4  14   0 3270.78 790.311   1
  -4  14   0 2662.01 554.003   1
  -4  14   0 2561.64 361.990   1
   4 -14   1 2535.45 1110.19   1
   4 -14   1 1563.60 491.381   1
   4 -14   1 1325.11 402.793   1
  -4 -14  -1 1094.26 203.229   1
  -4 -14  -1 1408.68 698.014   1
  -4 -14  -1 1500.76 540.039   1
  -4 -14  -1 1125.68 535.457   1
   4  14   1 1528.04 680.558   1
   4  14   1 1349.55 465.197   1
   4  14   1  752.78 665.939   1
   4  14   1 1524.76 246.127   1
  -4  14  -1 1175.21 472.616   1
  -4  14  -1 -179.97 758.236   1
  -4  14  -1 2163.43 370.936   1
  -4  14  -1 1679.25 506.655   1
   4 -14   2 -507.09 723.979   1
   4 -14   2  605.06 620.554   1
   4 -14   2    0.81 308.968   1
  -4 -14  -2  235.00 185.206   1
  -4 -14  -2 -141.11 536.984   1
  -4 -14  -2  385.55 511.455   1
  -4 -14  -2  643.25 543.966   1
   4  14   2   53.94 776.783   1
   4  14   2 1108.22 774.383   1
   4  14   2  343.22 159.873   1
   4  14   2  340.82 407.375   1
  -4  14  -2 -208.25 763.909   1
  -4  14  -2  248.53 393.410   1
  -4  14  -2 -360.24 571.459   1
   4 -14   3 1605.06 907.483   1
   4 -14   3  347.15 728.780   1
   4 -14   3  614.66 344.097   1
  -4 -14  -3  469.78 568.841   1
  -4 -14  -3  649.36 598.516   1
  -4 -14  -3 1734.45 613.571   1
  -4 -14  -3 1240.45 563.604   1
   4  14   3 1359.15 835.260   1
   4  14   3 1404.10 856.207   1
   4  14   3  931.70 232.380   1
   4  14   3 1560.77 563.386   1
  -4  14  -3 1740.56 939.558   1
  -4  14  -3 1253.98 461.269   1
  -4  14  -3  710.45 698.014   1
   4 -14   4 1492.25 1021.60  -1
   4 -14   4 -158.76 862.098  -1
   4 -14   4 1097.97 438.359  -1
  -4 -14  -4 -1764.8 1296.09  -1
  -4 -14  -4  661.79 586.515  -1
  -4 -14  -4  824.35 501.418  -1
  -4 -14  -4 1010.69 545.494  -1
   4  14   4  436.39 209.579  -1
   4  14   4  588.91 896.792  -1
   4  14   4 1187.43 778.310  -1
   4  14   4  685.14 462.797  -1
  -4  14  -4 -111.02 752.127  -1
  -4  14  -4 1023.56 424.394  -1
  -4  14  -4 1006.76 761.509  -1
   4 -14   5  -76.85 1040.58   1
   4 -14   5  356.32 730.307   1
   4 -14   5  533.93 415.012   1
  -4 -14  -5  126.95 543.312   1
  -4 -14  -5  218.20 1002.18   1
  -4 -14  -5  339.30 486.362   1
  -4 -14  -5  349.99 437.050   1
   4  14   5  311.80 243.290   1
   4  14   5  792.49 633.864   1
   4  14   5  118.48 871.044   1
   4  14   5  801.44 527.820   1
  -4  14  -5  642.59 961.596   1
  -4  14  -5  152.37 811.040   1
  -4  14  -5   25.97 382.064   1
   4 -14   6 -1152.1 842.679  -1
   4 -14   6 -104.36 881.954  -1
   4 -14   6  929.08 480.689  -1
  -4 -14  -6 1709.58 735.107  -1
  -4 -14  -6  900.94 614.880  -1
   4  14   6 1478.72 617.717  -1
   4  14   6  889.15 619.899  -1
  -4  14  -6 2205.98 1112.15  -1
  -4  14  -6 -635.83 1015.71  -1
  -4  14  -6 1065.24 531.311  -1
   4 -14   7  648.92 845.952   1
   4 -14   7  954.40 976.652   1
   4 -14   7  933.89 539.384   1
  -4 -14  -7  462.36 480.907   1
  -4 -14  -7   31.81 534.802   1
   4  14   7  607.90 670.739   1
   4  14   7  342.57 558.804   1
  -4  14  -7  437.70 956.359   1
  -4  14  -7 -578.22 1161.25   1
  -4  14  -7   37.46 535.675   1
   4 -14   8 -298.06 778.747   1
   4 -14   8 -309.40 562.077   1
  -4 -14  -8  505.56 494.435   1
  -4 -14  -8 -424.61 624.699   1
   4  14   8  -69.19 488.544   1
   4  14   8  381.19 677.721   1
  -4  14  -8  352.39 753.218   1
  -4  14  -8  486.58 1217.98   1
  -4  14  -8  -83.74 584.333   1
   4 -14   9  265.76 571.677   1
  -4 -14  -9  265.98 693.868   1
  -4 -14  -9 -208.49 443.814   1
   4  14   9  717.22 820.204   1
   4  14   9  422.21 565.568   1
  -4  14  -9  382.06 631.027   1
   4 -14  10 1727.25 701.287   1
  -4 -14 -10 1873.66 832.423   1
   4  14  10 1841.80 892.209   1
  -4  14 -10  759.98 739.035   1
   4 -14  11  289.33 567.313   1
  -4 -14 -11   40.50 581.278   1
   4  14  11 -695.18 707.833   1
  -4  14 -11  723.54 721.361   1
   4 -16  -9  -65.61 494.872   1
  -4 -16   9 -314.64 753.218   1
  -4 -16   9  170.61 573.641   1
   4  16  -9  -54.22 642.155   1
   4  16  -9   87.32 508.836   1
  -4  16   9 -814.53 667.684   1
   4 -16  -8 1132.01 620.554   1
  -4 -16   8  767.62 852.716   1
  -4 -16   8   30.07 551.167   1
   4  16  -8  502.29 641.719   1
   4  16  -8  435.74 551.821   1
  -4  16   8  716.78 620.117   1
   4 -16  -7  269.04 747.763   1
   4 -16  -7  177.44 445.123   1
  -4 -16   7 -584.99 749.508   1
  -4 -16   7  185.53 774.601   1
  -4 -16   7  929.30 629.936   1
   4  16  -7  311.15 606.371   1
   4  16  -7 -165.76 601.134   1
   4  16  -7 1307.44 756.054   1
  -4  16   7 1208.38 679.467   1
  -4  16   7 -130.85 715.906   1
   4 -16  -6  -65.68 365.481   1
   4 -16  -6 1039.27 680.122   1
  -4 -16   6  889.37 874.317   1
  -4 -16   6 -275.58 764.128   1
  -4 -16   6  241.76 550.294   1
   4  16  -6  218.20 738.598   1
   4  16  -6  -45.89 604.407   1
   4  16  -6  653.50 641.719   1
  -4  16   6 -345.19 519.965   1
  -4  16   6 -357.19 617.499   1
   4 -16  -5  635.39 562.949  -1
   4 -16  -5  101.44 425.703  -1
  -4 -16   5 -261.62 481.344  -1
  -4 -16   5   60.44 475.234  -1
  -4 -16   5  776.35 830.023  -1
  -4 -16   5  747.76 784.202  -1
   4  16  -5   45.23 687.977  -1
   4  16  -5 -128.52 751.036  -1
   4  16  -5  -47.81 703.687  -1
   4  16  -5  363.74 539.602  -1
  -4  16   5  127.25 523.456  -1
  -4  16   5  743.84 534.366  -1
   4 -16  -4  562.95 490.944   1
   4 -16  -4  104.39 406.720   1
  -4 -16   4   88.33 426.358   1
  -4 -16   4  307.00 439.668   1
  -4 -16   4 -674.23 1004.36   1
  -4 -16   4 -673.79 793.584   1
   4  16  -4  313.33 876.063   1
   4  16  -4   62.23 459.742   1
   4  16  -4  348.02 678.376   1
   4  16  -4  -63.23 723.761   1
  -4  16   4  -16.50 566.222   1
  -4  16   4  686.89 475.670   1
   4 -16  -3  564.48 472.834  -1
   4 -16  -3  226.71 471.525  -1
   4 -16  -3 -195.09 542.003  -1
  -4 -16   3 -522.58 339.079  -1
  -4 -16   3 -790.75 829.150  -1
  -4 -16   3  268.82 785.074  -1
  -4 -16   3  435.52 433.777  -1
   4  16  -3  167.97 361.771  -1
   4  16  -3 -473.05 547.676  -1
   4  16  -3  347.37 819.113  -1
   4  16  -3  770.46 662.229  -1
  -4  16   3 -205.21 582.587  -1
  -4  16   3  126.25 674.448  -1
  -4  16   3  379.88 384.464  -1
   4 -16  -2 1404.76 634.736   1
   4 -16  -2  589.57 526.292   1
   4 -16  -2 1387.52 581.714   1
   4 -16  -2  217.22 203.469   1
  -4 -16   2  488.54 755.836   1
  -4 -16   2  292.17 235.653   1
  -4 -16   2 -358.28 521.492   1
  -4 -16   2 1504.69 515.164   1
   4  16  -2  743.18 276.238   1
   4  16  -2  605.06 552.912   1
   4  16  -2 1458.65 876.063   1
   4  16  -2  742.53 526.947   1
  -4  16   2 2097.31 948.504   1
  -4  16   2 -162.25 634.518   1
  -4  16   2 1502.07 459.087   1
   4 -16  -1  520.62 463.670   1
   4 -16  -1  801.66 126.380   1
   4 -16  -1  595.68 468.252   1
   4 -16  -1  478.94 565.131   1
  -4 -16   1 1491.38 294.785   1
  -4 -16   1 1394.72 535.457   1
  -4 -16   1 2243.07  999.34   1
  -4 -16   1  418.07 440.541   1
   4  16  -1  695.18 240.672   1
   4  16  -1  749.94 519.965   1
   4  16  -1  300.02 373.554   1
   4  16  -1 2489.63 1054.33   1
  -4  16   1 1291.29 772.637   1
  -4  16   1  622.74 550.294   1
  -4  16   1  326.64 335.806   1
   4 -16   0  703.47 345.843   1
   4 -16   0  472.83 478.289   1
   4 -16   0 -452.54 455.160   1
  -4 -16   0  741.22 353.916   1
  -4 -16   0  645.86 181.780   1
  -4 -16   0 1338.21 680.776   1
  -4 -16   0 1193.54 581.060   1
   4  16   0  199.54 149.007   1
   4  16   0 1182.85 607.680   1
   4  16   0  676.41 334.715   1
   4  16   0 1929.52 943.922   1
  -4  16   0  847.92 707.833   1
  -4  16   0  934.10 435.522   1
  -4  16   0  558.80 283.002   1
  -4  16   0  451.67 103.011   1
   4 -16   1 1042.33 693.650   1
   4 -16   1 2190.70 659.829   1
   4 -16   1 1507.31 463.451   1
  -4 -16  -1 1842.68 281.475   1
  -4 -16  -1 1475.89 691.468   1
  -4 -16  -1 1466.94 483.089   1
  -4 -16  -1 1735.32 700.196   1
   4  16   1 1262.05 725.725   1
   4  16   1  400.83 634.300   1
   4  16   1 1847.70 280.602   1
   4  16   1 2133.97 538.293   1
  -4  16  -1  702.60 735.107   1
  -4  16  -1 1453.85 481.998   1
  -4  16  -1 2051.27 623.390   1
   4 -16   2  783.55 721.143   1
   4 -16   2  615.32 798.821   1
   4 -16   2  154.55 344.097   1
  -4 -16  -2  482.43 192.188   1
  -4 -16  -2  124.46 447.741   1
  -4 -16  -2  149.38 469.343   1
  -4 -16  -2  279.07 569.059   1
   4  16   2  138.86 154.266   1
   4  16   2  203.95 787.256   1
   4  16   2 1475.89 813.440   1
   4  16   2 1008.07 420.903   1
  -4  16  -2  272.09 803.185   1
  -4  16  -2  555.31 426.358   1
  -4  16  -2  298.06 639.537   1
   4 -16   3 2126.77 1068.29   1
   4 -16   3 1068.95 788.347   1
   4 -16   3 2017.02 614.008   1
  -4 -16  -3 2747.11 744.490   1
  -4 -16  -3 3816.27 1363.30   1
  -4 -16  -3 2293.26 765.219   1
   4  16   3 3720.27 1425.48   1
   4  16   3 1030.11 916.866   1
   4  16   3 3502.07 791.620   1
  -4  16  -3 2518.00 1265.76   1
  -4  16  -3 1223.00 564.477   1
   4 -16   4 1572.77 925.594   1
   4 -16   4 1519.75 602.225   1
  -4 -16  -4 2838.75 753.218   1
  -4 -16  -4 -241.33 1238.49   1
  -4 -16  -4 1844.86 769.146   1
  -4 -16  -4 2703.47 1019.20   1
   4  16   4 1919.48 382.282   1
   4  16   4 1842.24 874.317   1
   4  16   4 1796.64 1083.13   1
   4  16   4 2080.08 549.203   1
  -4  16  -4 2814.75 1262.49   1
  -4  16  -4 1022.69 797.294   1
  -4  16  -4 1997.82 565.350   1
   4 -16   5 1056.29 780.929   1
   4 -16   5  913.16 808.203   1
   4 -16   5  360.03 472.398   1
  -4 -16  -5  -75.34 492.035   1
  -4 -16  -5 -432.25 922.539   1
  -4 -16  -5  -75.52 639.537   1
  -4 -16  -5  729.65 516.692   1
   4  16   5  308.09 267.074   1
   4  16   5  129.72 627.754   1
   4  16   5 -966.40 1173.90   1
   4  16   5  785.95 515.601   1
  -4  16  -5   94.35 643.028   1
  -4  16  -5 -221.91 816.713   1
  -4  16  -5  922.32 427.449   1
   4 -16   6  689.94 734.234   1
   4 -16   6  -33.47 724.197   1
   4 -16   6 -280.38 537.857   1
  -4 -16  -6 -919.27 947.850   1
  -4 -16  -6  361.55 495.526   1
  -4 -16  -6   72.83 595.679   1
   4  16   6 1044.73 682.304   1
   4  16   6  307.22 585.860   1
  -4  16  -6 -1152.7 756.272   1
  -4  16  -6  575.60 918.393   1
  -4  16  -6  760.20 464.324   1
   4 -16   7 -272.31 742.090   1
   4 -16   7 1231.51 832.860   1
   4 -16   7 1094.70 564.259   1
  -4 -16  -7  843.99 538.948   1
  -4 -16  -7 -555.75 629.063   1
   4  16   7  830.68 622.954   1
   4  16   7 -251.36 611.826   1
  -4  16  -7  224.09 663.320   1
  -4  16  -7  399.30 972.724   1
  -4  16  -7  134.89 500.109   1
   4 -16   8  542.44 698.668  -1
   4 -16   8  288.02 517.783  -1
  -4 -16  -8  215.38 469.997  -1
   4  16   8  389.92 696.050  -1
  -4  16  -8 -184.38 620.554  -1
  -4  16  -8  704.56 544.839  -1
   4  18  -6  138.90 464.106   1
   4 -18  -5 -339.30 459.960   1
  -4 -18   5  382.50 661.357   1
  -4 -18   5 -109.73 391.664   1
  -4 -18   5  900.94 516.692   1
   4  18  -5  729.87 632.773   1
   4  18  -5  169.32 623.827   1
   4  18  -5 -438.58 475.452   1
  -4  18   5  260.31 607.680   1
   4 -18  -4 1495.31 661.793   1
   4 -18  -4  312.90 610.080   1
  -4 -18   4  574.95 346.061   1
  -4 -18   4  236.31 755.181   1
  -4 -18   4  417.19 460.178   1
   4  18  -4  596.55 682.740   1
   4  18  -4 1012.65 642.810   1
   4  18  -4 -151.32 339.952   1
  -4  18   4 2345.62 1007.42   1
  -4  18   4 1862.75 789.875   1
   4 -18  -3 2441.63 918.393   1
   4 -18  -3  855.33 623.608   1
  -4 -18   3  760.85 276.238   1
  -4 -18   3 1104.73 812.349   1
  -4 -18   3 1502.07 510.146   1
   4  18  -3 1001.53 728.561   1
   4  18  -3  114.90 540.693   1
   4  18  -3  180.62 329.260   1
  -4  18   3 1922.32 900.719   1
  -4  18   3  379.88 644.773   1
   4 -18  -2  270.13 141.697   1
   4 -18  -2 1514.73 693.432   1
   4 -18  -2 -825.44 638.664   1
  -4 -18   2   29.33 186.493   1
  -4 -18   2 1185.90 488.544   1
  -4 -18   2  643.03 691.468   1
   4  18  -2 1228.45 761.291   1
   4  18  -2  -94.24 543.094   1
   4  18  -2  269.69 243.945   1
  -4  18   2 1629.50 874.099   1
  -4  18   2 1202.70 731.616   1
   4 -18  -1  350.43 477.852   1
   4 -18  -1  286.49 541.130   1
  -4 -18   1  756.93 628.409   1
  -4 -18   1  544.18 457.560   1
   4  18  -1  740.78 723.979   1
   4  18  -1  705.00 555.313   1
  -4  18   1 -344.97 654.156   1
  -4  18   1  -84.66 465.852   1
   4 -18   0 1216.23 659.175   1
   4 -18   0  780.93 503.382   1
  -4 -18   0  931.05 182.740   1
  -4 -18   0  185.01 532.402   1
  -4 -18   0 1307.66 720.706   1
   4  18   0  354.13 680.122   1
   4  18   0  755.62 559.022   1
   4  18   0 1063.71 213.834   1
  -4  18   0  446.43 735.107   1
  -4  18   0  335.15 356.535   1
  -4  18   0  794.02 139.734   1
   4 -18   1  710.89 626.663   1
   4 -18   1  956.80 422.648   1
  -4 -18  -1  480.25 120.074   1
  -4 -18  -1 1105.17 598.297   1
  -4 -18  -1  -41.52 476.107   1
   4  18   1  253.76 115.077   1
   4  18   1  344.75 630.591   1
   4  18   1  129.19 645.646   1
  -4  18  -1 -284.53 650.010   1
  -4  18  -1  602.44 403.011   1
   4 -18   2  502.51 620.990   1
   4 -18   2  284.53 361.990   1
  -4 -18  -2  285.40 158.542   1
  -4 -18  -2   78.83 459.306   1
  -4 -18  -2  -82.39 568.404   1
   4  18   2 -825.66 693.650   1
   4  18   2  274.27 737.289   1
   4  18   2 -117.50 153.196   1
  -4  18  -2  124.57 668.993   1
  -4  18  -2  302.20 394.065   1
   4 -18   3  663.32 706.087   1
   4 -18   3  720.05 447.959   1
  -4 -18  -3 1785.07 756.709   1
  -4 -18  -3 1315.29 658.302   1
   4  18   3 1829.59 903.338   1
   4  18   3 1682.52 830.241   1
  -4  18  -3  977.96 714.815   1
  -4  18  -3 1560.77 575.169   1
   4 -18   4  -64.02 579.314   1
   4 -18   4 -737.94 479.816   1
  -4 -18  -4  -38.62 911.629   1
  -4 -18  -4 -148.79 465.852   1
  -4 -18  -4 -222.34 596.770   1
   4  18   4  163.32 615.317   1
   4  18   4 -261.18 846.388   1
   4  18   4   86.32 168.361   1
  -4  18  -4  514.95 597.643   1
  -4  18  -4 -216.98 428.976   1
  -4 -18  -5  583.90 803.839   1
   4  18   5  561.64 206.829   1
  -4 -18  -6  238.71 572.987   1
   5  -1  -4  12581. 1842.24   1
   5  -1  -4 7475.45 1729.00   1
   5   1  -4  13912. 2000.87   1
   5   1  -4 5897.88 1334.50   1
  -5   1   4  11759. 1709.80   1
  -5   1   4 6449.92 1551.38   1
   5  -1  -3 111433.  15080.   1
   5  -1  -3  95156.  20107.   1
  -5  -1   3  98429.  17698.   1
  -5  -1   3 112306.  23718.   1
   5   1  -3 106197.  14370.   1
   5   1  -3  98713.  17750.   1
   5   1  -3  92254.  19489.   1
  -5   1   3 106262.  14379.   1
  -5   1   3  94239.  19917.   1
   5  -1  -2  77133.  13875.   1
   5  -1  -2  67139. 9085.74   1
   5  -1  -2  41479. 8769.36   1
  -5  -1   2  78333.  14078.   1
  -5  -1   2  55968.  18756.   1
  -5  -1   2  49989.  10561.   1
   5   1  -2  47633.  10068.   1
   5   1  -2  66201. 8961.37   1
   5   1  -2  57168.  10290.   1
   5   1  -2  56600.  18964.   1
  -5   1   2  59502. 8055.85   1
  -5   1   2  77395.  16350.   1
  -5   1   2  61619.  11104.   1
   5  -1  -1 8457.33 2856.20   1
   5  -1  -1 1282.56 447.523   1
   5  -1  -1 5140.73 1107.13   1
  -5  -1   1 6626.66 2277.98   1
  -5  -1   1 2162.77 568.404   1
  -5  -1   1 3811.91 851.407   1
   5   1  -1 8457.33 2867.11   1
   5   1  -1 1756.93 310.495   1
   5   1  -1 1807.33 522.801   1
  -5   1   1 3593.71 785.729   1
  -5   1   1 7401.26 2507.09   1
  -5   1   1 2365.26 390.137   1
  -5   1   1 1347.81 467.815   1
   5  -1   0  35457.  11868.   1
   5  -1   0  26140. 4708.70   1
   5  -1   0  25267. 5343.66   1
   5  -1   0  26838. 3646.08   1
  -5  -1   0  23849. 4311.58   1
  -5  -1   0  23522. 4977.08   1
  -5  -1   0  22169. 3015.49   1
  -5  -1   0  34933.  11704.   1
   5   1   0  29871.  10007.   1
   5   1   0  25420. 3456.25   1
   5   1   0  23609. 4267.94   1
   5   1   0  23980. 5073.09   1
  -5   1   0  36744.  12298.   1
  -5   1   0  23958. 5064.36   1
  -5   1   0  26293. 4734.88   1
  -5   1   0  24940. 3392.97   1
   5  -1   1 188850.  25507.   1
   5  -1   1 223434.  74754.   1
   5  -1   1 170412.  30548.   1
  -5  -1  -1 187323.  25311.   1
  -5  -1  -1 199389.  42112.   1
  -5  -1  -1 300458. 100524.   1
  -5  -1  -1 165852.  29740.   1
   5   1   1 194850.  34933.   1
   5   1   1 240454.  80428.   1
   5   1   1 233471.  49291.   1
   5   1   1 155618.  21030.   1
  -5   1  -1 180973.  60550.   1
  -5   1  -1 168885.  22823.   1
  -5   1  -1 162819.  29195.   1
   5  -1   2 724197.  97840.   1
   5  -1   2 948286. 169998.   1
  -5  -1  -2 998690. 334060.   1
  -5  -1  -2 797512. 142963.   1
   5   1   2 871044. 291512.   1
   5   1   2 620554.  83853.   1
   5   1   2 625136. 112044.   1
  -5   1  -2 762382. 136635.   1
   5  -1   3  15756. 3126.77   1
  -5  -1  -3  16467. 3048.22   1
   5   1   3  15854. 2956.58   1
  -5   1  -3  21333. 4054.11   1
  -5  -1  -4 9705.42 2010.69   1
   5   1   4 7497.27 1758.45   1
  -5  -1  -5 6602.66 1744.49   1
   5   1   5 4603.97 1847.48   1
  -5  -3   8  30919. 6607.02   1
   5   3  -8  37137. 7918.39   1
  -5  -3   7 1376.17 751.908   1
   5   3  -7 1463.89 697.141   1
  -5  -3   6 2387.08 780.492   1
   5   3  -6 1704.78 589.570   1
  -5  -3   5  57975. 7944.57   1
  -5  -3   5  54528.  11538.   1
   5   3  -5  46258. 6343.00   1
   5   3  -5  52433.  11093.   1
   5  -3  -4  68099. 9282.12   1
  -5  -3   4  71176. 9681.42   1
  -5  -3   4  67227.  12117.   1
   5   3  -4  73140. 9936.71   1
   5   3  -4  62688.  11342.   1
  -5   3   4  66790. 9083.56   1
   5  -3  -3  38119. 5195.28   1
  -5  -3   3  35283. 4806.89   1
  -5  -3   3  28060. 5941.52   1
  -5  -3   3  26162. 4750.16   1
   5   3  -3  39145. 5326.20   1
   5   3  -3  24809. 5254.19   1
   5   3  -3  36875. 6672.48   1
  -5   3   3  36657. 4992.36   1
   5  -3  -2  17148. 2343.44   1
  -5  -3   2  19869. 2714.38   1
  -5  -3   2  26969. 5712.41   1
   5   3  -2  23500. 3200.96   1
   5   3  -2  17342. 3680.99   1
   5  -3  -1  59590. 8062.40  -1
   5  -3  -1  58062.  12265.  -1
  -5  -3   1  55269. 7486.35  -1
  -5  -3   1  47436.  10026.  -1
   5   3  -1  51233. 6936.50  -1
   5   3  -1  61248.  12943.  -1
  -5   3   1  54353. 7357.62  -1
   5  -3   0 184377.  33079.   1
   5  -3   0 206393.  27886.   1
   5  -3   0 303949. 101789.   1
   5  -3   0 215906.  45581.   1
  -5  -3   0 201942.  27297.   1
  -5  -3   0 164957.  34824.   1
   5   3   0 175125.  23674.   1
   5   3   0 183460.  38730.   1
   5   3   0 175016.  31399.   1
   5   3   0 189614.  63452.   1
  -5   3   0 320532. 107288.   1
  -5   3   0 197163.  41632.   1
  -5   3   0 180624.  32402.   1
  -5   3   0 192865.  26053.   1
   5  -3   1 131311.  17750.   1
  -5  -3  -1 133384.  18025.   1
  -5  -3  -1 164172.  34672.   1
   5   3   1 132773.  17945.   1
   5   3   1 140977.  29762.   1
  -5   3  -1 150971.  20404.   1
  -5  -3  -2 599170. 200502.  -1
  -5  -3  -2 970324. 204866.  -1
   5   3   2 890682. 298058.  -1
   5   3   2 889155. 187693.  -1
   5  -3   3  17089. 2795.11   1
  -5  -3  -3  47196.  15817.   1
   5   3   3  49182.  16487.   1
   5   3   3  16786. 2487.45   1
  -5  -3  -4 1411.74 936.940  -1
  -5  -3  -4 -7506.0 7015.05  -1
   5   3   4  991.05 772.855  -1
   5   3   4 9725.06 2286.71  -1
  -5  -3  -6 -1697.6 909.011  -1
   5   3   6 1801.87 1289.77  -1
  -5  -3  -8 2345.62 1503.60   1
   5   3   8 2115.21 1975.34   1
  -5  -5  11  384.46 575.169   1
   5   5 -11  329.26 764.782   1
  -5  -5  10    7.76 711.106   1
   5   5 -10 -394.28 742.962   1
  -5  -5   9  20511. 4409.77   1
   5   5  -9  25355. 5422.21   1
  -5  -5   8  32795. 6971.41   1
   5   5  -8  26620. 5670.95   1
  -5  -5   7 3484.61 922.975   1
   5   5  -7 4235.21 1014.84   1
  -5  -5   6 -758.67 1586.51   1
  -5  -5   6 2011.13 610.080   1
   5   5  -6 2899.84 1958.54   1
   5   5  -6 1053.24 432.031   1
  -5  -5   5 2428.54 750.818   1
  -5  -5   5 1690.81 1338.86   1
  -5  -5   5 2827.84 1247.87   1
   5   5  -5 3464.98 1528.69   1
   5   5  -5 3325.33 1321.84   1
   5   5  -5 5092.73 1031.64   1
   5  -5  -4 4226.48 912.065   1
  -5  -5   4 3700.63 1705.43   1
  -5  -5   4 2297.62 812.349   1
  -5  -5   4 3571.89 821.513   1
  -5  -5   4 1522.36 545.275   1
   5   5  -4 4113.02 1646.52   1
   5   5  -4 2367.44 591.097   1
   5   5  -4 2426.36 594.152   1
   5   5  -4 3133.32 907.701   1
  -5   5   4 2428.54 632.336   1
   5  -5  -3 4507.96 735.107   1
  -5  -5   3 5018.54 778.747   1
   5   5  -3 3966.83 638.009   1
  -5   5   3 4929.08 768.928   1
   5  -5  -2 9797.07 3305.69   1
   5  -5  -2 5380.75 772.637   1
  -5  -5   2 8068.94 2856.20   1
  -5  -5   2 5806.23 840.497   1
  -5  -5   2 6910.31 1351.95   1
   5   5  -2 7126.33 2502.72   1
   5   5  -2 7772.19 1090.99   1
   5   5  -2 6814.31 1328.82   1
  -5   5   2 9480.68 3216.23   1
   5  -5  -1  27733. 3766.09   1
   5  -5  -1  17748. 5948.06   1
  -5  -5   1  18189. 6153.17   1
  -5  -5   1  22758. 3102.77   1
  -5  -5   1  25005. 4529.78   1
  -5  -5   1  21660. 4593.06   1
   5   5  -1  17214. 5814.96   1
   5   5  -1  25398. 5378.57   1
   5   5  -1  21774. 3955.92   1
   5   5  -1  25573. 3475.89   1
  -5   5   1  22605. 7575.82   1
  -5   5   1  28758. 5184.37   1
  -5   5   1  26271. 3567.53   1
   5  -5   0  80188.  14386.   1
   5  -5   0  77286.  10454.   1
   5  -5   0 134453.  44992.   1
   5  -5   0  68885.  14582.   1
  -5  -5   0  78704.  16631.   1
  -5  -5   0  73729. 9973.81   1
  -5  -5   0  67139.  12069.   1
  -5  -5   0 130177.  43574.   1
   5   5   0 100109.  33515.   1
   5   5   0  71525. 9677.06   1
   5   5   0  87846.  15784.   1
   5   5   0  67445.  14253.   1
  -5   5   0 125224.  41916.   1
  -5   5   0  74405.  10065.   1
  -5   5   0  77460.  13897.   1
   5  -5   1  34104. 4630.15   1
   5  -5   1  24525. 8226.04   1
  -5  -5  -1  41741. 5657.86   1
  -5  -5  -1  36243. 7671.82   1
  -5  -5  -1  27667. 9284.30   1
  -5  -5  -1  36854. 6637.57   1
   5   5   1  39057. 7034.69   1
   5   5   1  27820. 9334.49   1
   5   5   1  26751. 5670.95   1
   5   5   1  38381. 5201.83   1
  -5   5  -1  27122. 9101.02   1
  -5   5  -1  45145. 6118.26   1
  -5  -5  -2 462142. 154615.   1
  -5  -5  -2 397774.  53742.   1
  -5  -5  -2 357189.  64041.   1
  -5  -5  -2 317041.  66965.   1
   5   5   2 365917. 122409.   1
   5   5   2 284966.  38490.   1
   5   5   2 341479.  72092.   1
   5   5   2 317914.  56993.   1
  -5   5  -2 347152.  47131.   1
  -5  -5  -3 -7128.5 4010.47   1
  -5  -5  -3 6246.99 1236.96   1
   5   5   3 5280.38 1076.37   1
  -5   5  -3 -7407.8 4963.99   1
  -5  -5  -4  17875. 6048.43  -1
  -5  -5  -4  10469. 1974.25  -1
   5   5   4  13646. 4651.97  -1
   5   5   4 9620.33 1834.82  -1
  -5  -5  -5  22431. 7582.36  -1
  -5  -5  -5  16347. 3083.13  -1
   5   5   5  26926. 9087.92  -1
   5   5   5  14403. 2768.93  -1
  -5  -5  -6 -104.08 744.926   1
   5   5   6  816.06 843.770   1
  -5  -5  -7 -408.03 927.339  -1
   5   5   7 1797.95 1461.27  -1
  -5  -5  -8  542.00 1002.40   1
   5   5   8 -574.73 1897.23   1
  -5  -5  -9 -1752.8 1135.06   1
   5   5   9 -3903.6 2107.79   1
  -5  -5 -10  161.36 1329.26   1
   5   5  10 1772.20 2227.80   1
  -5  -5 -11 -231.07 961.378   1
   5   5  11   85.95 1560.98   1
  -5  -7  14 -156.19 538.948   1
  -5  -7  13 -364.61 544.621   1
   5   7 -13  303.08 938.467   1
  -5  -7  12  888.06 583.896   1
   5   7 -12 -756.27 918.611   1
  -5  -7  11  -37.29 516.255  -1
   5   7 -11  619.46 838.969  -1
  -5  -7  10  137.22 473.707   1
   5   7 -10   60.09 604.625   1
  -5  -7   9  -49.18 519.310   1
   5   7  -9 -163.58 513.200   1
  -5  -7   8 3471.52 867.335   1
   5   7  -8  542.44 2435.08   1
   5   7  -8 2212.52 668.993   1
  -5  -7   7 3355.88 1934.98   1
  -5  -7   7 3595.89 1868.42   1
  -5  -7   7 3137.68 791.620   1
   5   7  -7 4228.67 1996.07   1
   5   7  -7 3397.33 836.787   1
   5   7  -7 3643.90 2570.37   1
  -5  -7   6 1528.26 1208.16   1
  -5  -7   6 3170.41 1929.08   1
  -5  -7   6 1135.72 476.325   1
   5   7  -6 2343.44 1580.40   1
   5   7  -6 1077.46 437.922   1
   5   7  -6 -814.31 1430.07   1
  -5  -7   5  42134.  14218.  -1
  -5  -7   5  38075. 5238.92  -1
  -5  -7   5  38839. 7069.60  -1
  -5  -7   5  50273.  10631.  -1
   5   7  -5  55269.  18560.  -1
   5   7  -5  48265. 6631.02  -1
   5   7  -5  50011.  10580.  -1
   5   7  -5  58957.  10668.  -1
   5  -7  -4 1482.87 1122.41   1
   5  -7  -4  579.53 613.135   1
  -5  -7   4 3702.81 837.005   1
  -5  -7   4 1315.08 688.849   1
  -5  -7   4 2799.47 584.987   1
   5   7  -4 1854.68 532.184   1
   5   7  -4 2452.54 611.607   1
   5   7  -4 1230.85 809.731   1
  -5   7   4  179.42 1633.43   1
   5  -7  -3  557.49 375.300   1
   5  -7  -3 2154.26 921.448   1
   5  -7  -3 2020.51 781.583   1
  -5  -7   3  866.03 317.477   1
  -5  -7   3 3460.61 1568.19   1
  -5  -7   3  174.34 557.931   1
   5   7  -3  219.07 498.363   1
   5   7  -3 4121.75 1616.84   1
   5   7  -3 1130.04 340.606   1
  -5   7   3 3410.43 1348.02   1
  -5   7   3  873.01 1144.66   1
  -5   7   3 1088.59 366.790   1
   5  -7  -2 3960.28 1382.72   1
   5  -7  -2 7030.32 983.634   1
   5  -7  -2 5086.18 1030.76   1
  -5  -7   2 7150.33 1009.38   1
  -5  -7   2 5993.88 1310.93   1
  -5  -7   2 7617.27 1482.65   1
  -5  -7   2 3360.24 1467.81   1
   5   7  -2 6500.10 2341.26   1
   5   7  -2 7333.62 1030.98   1
   5   7  -2 9345.40 2018.33   1
   5   7  -2 6148.80 1223.21   1
  -5   7   2 5926.24 2043.20   1
  -5   7   2 6338.64 1255.07   1
  -5   7   2 5836.78 816.931   1
   5  -7  -1 2923.85 439.013   1
   5  -7  -1  17046. 5721.14   1
  -5  -7   1 3576.26 548.330   1
  -5  -7   1  13391. 4569.05   1
  -5  -7   1 4678.15 1048.66   1
  -5  -7   1 2840.93 644.337   1
   5   7  -1  16055. 5441.84   1
   5   7  -1 3419.15 516.037   1
   5   7  -1 4324.67 891.118   1
   5   7  -1 4045.38 917.957   1
  -5   7   1  16164. 5430.94   1
  -5   7   1 3750.81 536.766   1
  -5   7   1 2288.89 472.179   1
   5   7   0 8791.18 1626.44   1
   5   7   0  26904. 9059.56   1
   5   7   0 3054.76 728.125   1
   5   7   0 7316.16 1016.36   1
  -5   7   0  19022. 6393.19   1
  -5   7   0 5819.33 805.585   1
  -5   7   0 4595.24 984.725   1
  -5   7   0 7523.45 1369.19   1
   5  -7   1  51080.  17118.   1
   5  -7   1  33188. 5976.43   1
   5  -7   1  21783. 4606.15   1
  -5  -7  -1  27733. 3761.72   1
  -5  -7  -1  37115.  12444.   1
  -5  -7  -1  27580. 4977.08   1
  -5  -7  -1  27253. 5780.05   1
   5   7   1  23565. 5007.63   1
   5   7   1  35893.  12042.   1
   5   7   1  27558. 3739.90   1
   5   7   1  29086. 5245.47   1
  -5   7  -1  30657. 4161.03   1
  -5   7  -1  34082.  11434.   1
  -5   7  -1  21636. 4575.60   1
  -5   7  -1  30024. 5417.84   1
   5  -7   2 1568.62 964.215   1
   5  -7   2 1443.16 722.234   1
   5  -7   2 3478.07 1444.25   1
   5  -7   2 1823.26 512.982   1
  -5  -7  -2 4281.03 1536.76   1
  -5  -7  -2 1228.67 348.025   1
  -5  -7  -2 1151.21 424.176   1
  -5  -7  -2 1029.89 453.633   1
   5   7   2 2081.17 651.974   1
   5   7   2 4429.41 1602.22   1
   5   7   2  910.76 256.164   1
   5   7   2   68.45 369.408   1
  -5   7  -2 5302.20 1971.41   1
  -5   7  -2  485.49 1428.32   1
  -5   7  -2  288.24 2585.64   1
  -5   7  -2 1535.89 459.960   1
  -5  -7  -3  57299.  10310.   1
  -5  -7  -3  62775.  21032.   1
  -5  -7  -3  51036.  10799.   1
   5   7   3  58651.  19646.   1
   5   7   3  53480.  11333.   1
   5   7   3  65743.  11820.   1
  -5   7  -3  49269.  16533.   1
  -5  -7  -4 -4440.3 7233.25   1
  -5  -7  -4  18494. 6244.81   1
  -5  -7  -4 6696.48 1329.26   1
   5   7   4  14683. 4979.27   1
   5   7   4 9982.53 1899.85   1
   5   7   4 7292.16 1309.18   1
  -5  -7  -5  16991. 3146.41   1
   5   7   5 5548.76 2016.80   1
   5   7   5  17019. 3157.32   1
  -5  -7  -6  979.71 720.706  -1
  -5  -7  -6 1048.66 715.688  -1
   5   7   6 2435.08 1082.48  -1
   5   7   6 1202.70 902.247  -1
  -5  -7  -7 6916.86 2461.27   1
  -5  -7  -7  14656. 2766.74   1
   5   7   7 6670.30 2371.81   1
   5   7   7  11606. 2426.36   1
  -5  -7  -8 3534.80 1083.35   1
   5   7   8 1694.30 1671.39   1
  -5  -7  -9  688.19 816.713   1
   5   7   9 2950.03 1634.52   1
  -5  -7 -10 -296.75 815.840   1
   5   7  10  634.08 1379.23   1
  -5  -7 -11  507.31 843.333  -1
   5   7  11  502.95 1394.06  -1
  -5  -7 -12  706.31 888.500   1
   5   7  12  958.98 1295.00   1
  -5  -7 -13 -205.06 858.171   1
   5   7  13 1579.97 1459.30   1
  -5  -7 -14 -629.28 776.783   1
  -5  -9  15  156.40 598.079   1
   5   9 -15  327.73 827.623   1
  -5  -9  14  479.38 520.619   1
   5   9 -14  422.21 1056.51   1
  -5  -9  13 -322.50 541.784   1
   5   9 -13 2310.71 1131.35   1
  -5  -9  12  -67.12 560.986   1
   5   9 -12 -695.61 831.769   1
  -5  -9  11  563.17 535.020   1
   5   9 -11 -344.75 722.234   1
  -5  -9  10 1080.95 597.425   1
   5   9 -10 2087.50 861.662   1
  -5  -9   9 4682.52 1753.65  -1
  -5  -9   9 4501.41 1115.64  -1
   5   9  -9  955.92 1915.99  -1
   5   9  -9 5077.46 1265.76  -1
  -5  -9   8 -418.94 1684.27   1
  -5  -9   8 -1569.5 1634.74   1
  -5  -9   8   24.18 453.633   1
   5   9  -8 1288.24 1418.94   1
   5   9  -8  184.16 528.474   1
   5   9  -8 -637.14 2262.71   1
  -5  -9   7 1757.80 1736.42   1
  -5  -9   7 1861.88 1183.94   1
   5   9  -7 4743.61 2147.72   1
   5   9  -7 1334.06 1612.92   1
   5  -9  -6 1318.57 991.489   1
  -5  -9   6  519.75 998.908   1
  -5  -9   6 2873.66 707.614   1
  -5  -9   6 2644.55 1867.55   1
   5   9  -6 1959.41 1523.45   1
   5   9  -6 3126.77 766.310   1
   5   9  -6 1197.69 1095.57   1
  -5   9   6 1795.11 1384.90   1
   5  -9  -5  35937.  12053.   1
   5  -9  -5  35283. 6425.92   1
  -5  -9   5  30875. 4296.31   1
  -5  -9   5  43880.  14872.   1
  -5  -9   5  35501. 6473.92   1
  -5  -9   5  33755. 7145.97   1
   5   9  -5  34672. 7344.53   1
   5   9  -5  57582.  19374.   1
   5   9  -5  41327. 7532.18   1
   5   9  -5  35697. 4950.90   1
  -5   9   5  39821.  13356.   1
  -5   9   5  41065. 7586.73   1
   5  -9  -4  16201. 3002.40   1
   5  -9  -4  19496. 6552.47   1
  -5  -9   4  18992. 4034.47   1
  -5  -9   4  14665. 2075.71   1
  -5  -9   4  15045. 5300.02   1
  -5  -9   4  19190. 3598.08   1
   5   9  -4  14680. 5088.36   1
   5   9  -4  15082. 2125.24   1
   5   9  -4  18211. 3886.10   1
   5   9  -4  20087. 3796.64   1
  -5   9   4  15064. 5092.73   1
  -5   9   4  14763. 2856.20   1
   5  -9  -3  26969. 4876.71   1
   5  -9  -3  25682. 8614.44   1
   5  -9  -3  24787. 3403.88   1
  -5  -9   3  27122. 3702.81   1
  -5  -9   3  23369. 7951.12   1
  -5  -9   3  21863. 4638.88   1
  -5  -9   3  26533. 4826.53   1
   5   9  -3  16356. 5581.49   1
   5   9  -3  31050. 4233.03   1
   5   9  -3  33624. 6102.98   1
   5   9  -3  27122. 5760.41   1
  -5   9   3  22867. 7691.46   1
  -5   9   3  29675. 4054.11   1
  -5   9   3  27078. 4909.44   1
   5  -9  -2 4686.88 926.466   1
   5  -9  -2 6964.86 981.452   1
   5  -9  -2 7484.17 2542.00   1
  -5  -9   2 7270.34 2596.55   1
  -5  -9   2 7130.69 1013.96   1
  -5  -9   2 5511.67 1171.94   1
  -5  -9   2 9179.57 1989.52   1
   5   9  -2 7981.66 2830.02   1
   5   9  -2 7885.66 1735.11   1
   5   9  -2 3770.45 882.172   1
   5   9  -2 7438.35 1048.44   1
  -5   9   2  11641. 3942.83   1
  -5   9   2 5350.20 1040.80   1
  -5   9   2 8234.77 1139.43   1
   5  -9  -1 1081.60 483.962   1
   5  -9  -1 2066.77 462.360   1
   5  -9  -1 1254.42 381.627   1
   5  -9  -1 1086.19 212.721   1
  -5  -9   1 3054.76 1360.68   1
  -5  -9   1 1137.46 277.984   1
  -5  -9   1 1119.79 496.617   1
  -5  -9   1 1810.82 513.637   1
   5   9  -1 1542.00 473.270   1
   5   9  -1 1018.33 495.308   1
   5   9  -1 1685.36  999.56   1
   5   9  -1  579.97 205.978   1
  -5   9   1  947.20 321.187   1
  -5   9   1 1468.91 686.013   1
  -5   9   1 1139.86 203.840   1
  -5   9   1 1597.86 463.233   1
   5  -9   0  10971. 2334.71   1
  -5  -9   0  10000. 2162.99   1
   5   9   0  13650. 1869.52   1
   5   9   0  12732. 4355.22   1
   5   9   0  13275. 2432.90   1
  -5   9   0  11778. 4003.92   1
  -5   9   0  11866. 2150.34   1
  -5   9   0  13005. 1770.45   1
   5  -9   1 1884.35 431.158   1
   5  -9   1 1939.34 502.727   1
   5  -9   1  960.07 276.456   1
  -5  -9  -1 3576.26 1306.57   1
  -5  -9  -1  928.65 217.346   1
  -5  -9  -1  616.63 424.612   1
  -5  -9  -1  766.75 467.815   1
   5   9   1  546.58 524.983   1
   5   9   1  699.76 191.032   1
   5   9   1 1131.35 442.068   1
   5   9   1 6148.80 2170.85   1
  -5   9  -1 2574.73 1090.11   1
  -5   9  -1 1832.64 512.328   1
  -5   9  -1  976.87 296.530   1
   5  -9   2  33428. 4638.88   1
   5  -9   2  33144.  11154.   1
   5  -9   2  23609. 4291.94   1
  -5  -9  -2  26249. 5572.76   1
  -5  -9  -2  29718. 4041.02   1
  -5  -9  -2  26380. 4782.89   1
  -5  -9  -2  30068.  10094.   1
   5   9   2  27297. 9179.57   1
   5   9   2  32926. 5956.79   1
   5   9   2  25442. 5424.39   1
   5   9   2  24984. 3399.52   1
  -5   9  -2  33581.  11298.   1
  -5   9  -2  44250. 6358.27   1
   5  -9   3  19177. 6524.10   1
   5  -9   3  17314. 3379.88   1
   5  -9   3  19317. 4097.75   1
  -5  -9  -3  11152. 2080.08   1
  -5  -9  -3  24831. 8352.60   1
  -5  -9  -3  13168. 2830.02   1
   5   9   3  25616. 8620.98   1
   5   9   3  13441. 2941.30   1
  -5   9  -3  16382. 5594.58   1
  -5   9  -3  19915. 4226.48   1
  -5   9  -3  13635. 3107.13   1
   5  -9   4  12241. 4289.76   1
   5  -9   4 5382.93 1233.25   1
  -5  -9  -4 -2264.9 6244.81   1
  -5  -9  -4 6731.39 2343.44   1
  -5  -9  -4 8762.81 1685.36   1
   5   9   4 7848.56 2729.65   1
   5   9   4 7087.05 1409.56   1
   5   9   4 7807.11 1169.10   1
  -5   9  -4 3707.18 938.031   1
  -5  -9  -5 -5470.2 5337.11   1
  -5  -9  -5 2808.20 1105.61   1
  -5  -9  -5 4603.97 975.779   1
   5   9   5 1020.95 753.654   1
   5   9   5 5972.06 1212.52   1
   5   9   5 4529.78 886.100   1
  -5  -9  -6 2998.03 1168.88   1
  -5  -9  -6 5267.29 1126.34   1
   5   9   6 1756.05 857.298   1
   5   9   6 3526.07 943.268   1
  -5  -9  -7 1083.79 739.689   1
  -5  -9  -7 1583.02 697.141   1
   5   9   7 2723.10 1145.54   1
   5   9   7 1646.95 873.226   1
  -5  -9  -8 4278.85 1599.17  -1
  -5  -9  -8 2404.54 749.072  -1
   5   9   8 2862.75 1173.90  -1
   5   9   8  391.01 882.609  -1
  -5  -9  -9  256.38 561.204  -1
  -5  -9  -9  985.82 708.269  -1
   5   9   9 -121.03 541.348  -1
   5   9   9 -342.13 1180.67  -1
  -5  -9 -10 -118.74 747.981   1
   5   9  10  400.39 1389.26   1
  -5  -9 -11 2880.21 960.287   1
   5   9  11  301.33 1365.26   1
  -5  -9 -12 1981.23 887.627   1
   5   9  12 -1577.3 1392.32   1
  -5  -9 -13 2260.53 907.483   1
   5   9  13 -546.15 1268.16   1
  -5 -11  13 -284.09 552.040   1
   5  11 -13 -1748.6 1054.77   1
  -5 -11  12   59.92 561.422   1
   5  11 -12 -762.82 907.483   1
  -5 -11  11 -532.18 549.421   1
   5  11 -11  265.76 1009.82   1
   5  11 -11 1186.34 862.316   1
  -5 -11  10  552.69 1078.77   1
  -5 -11  10  919.05 545.930   1
   5  11 -10 -154.57 924.939   1
   5  11 -10 2253.98 1269.91   1
   5  11 -10 1385.77 785.947   1
   5 -11  -9 1236.53 1007.64   1
  -5 -11   9  395.59 1044.29   1
  -5 -11   9  988.65 499.890   1
  -5 -11   9  351.08 1061.53   1
   5  11  -9 -177.44 944.359   1
   5  11  -9  481.13 594.588   1
   5  11  -9 -341.26 1156.01   1
  -5  11   9 -719.62 1219.72   1
   5 -11  -8 1104.08 889.373   1
  -5 -11   8  905.30 1317.48   1
  -5 -11   8 -629.72 1229.32   1
  -5 -11   8 1888.94 627.318   1
   5  11  -8 1463.67 610.516   1
   5  11  -8  820.20 1075.50   1
   5  11  -8 1261.62 1534.36   1
  -5  11   8  364.39 1106.04   1
   5 -11  -7  981.45 851.625   1
   5 -11  -7 2518.00 981.016   1
  -5 -11   7 -624.92 1472.40   1
  -5 -11   7 1070.04 1158.19   1
  -5 -11   7 1561.20 545.275   1
   5  11  -7 2550.73 1447.74   1
   5  11  -7 2000.87 636.046   1
   5  11  -7 2768.93 1425.48   1
  -5  11   7  579.31 1152.30   1
   5 -11  -6  627.97 536.111  -1
   5 -11  -6  300.46 758.236  -1
  -5 -11   6 1897.01 1776.56  -1
  -5 -11   6 1647.83 1020.73  -1
  -5 -11   6  882.61 404.102  -1
   5  11  -6 -483.74 1189.61  -1
   5  11  -6 1241.11 734.234  -1
   5  11  -6  843.11 479.380  -1
   5  11  -6 1264.89 1194.63  -1
  -5  11   6  108.49 559.022  -1
  -5  11   6  758.45 927.121  -1
   5 -11  -5  881.08 660.266   1
   5 -11  -5  303.51 500.109   1
  -5 -11   5 3406.06 1083.35   1
  -5 -11   5 1348.68 1420.90   1
  -5 -11   5  878.68 965.960   1
  -5 -11   5 1761.73 507.745   1
   5  11  -5 1535.89 534.147   1
   5  11  -5 1870.17 1168.23   1
   5  11  -5  890.03 1114.99   1
   5  11  -5  121.71 910.756   1
  -5  11   5 1249.84 691.468   1
  -5  11   5  958.54 732.271   1
   5 -11  -4 1364.17 547.239   1
   5 -11  -4 2982.76 1098.41   1
  -5 -11   4 1452.98 545.494   1
  -5 -11   4 3975.56 1825.88   1
  -5 -11   4 2256.16 825.441   1
  -5 -11   4 2843.11 677.285   1
   5  11  -4 1470.00 528.256   1
   5  11  -4 4547.24 1835.04   1
   5  11  -4 1266.64 743.399   1
   5  11  -4 2380.53 605.280   1
  -5  11   4 4833.07 1715.90   1
  -5  11   4 1918.17 644.119   1
   5 -11  -3 -236.09 440.759   1
   5 -11  -3 1064.37 552.694   1
   5 -11  -3  740.13 385.119   1
  -5 -11   3  314.42 339.297   1
  -5 -11   3 -121.86 325.551   1
  -5 -11   3  952.21 1262.71   1
  -5 -11   3  639.32 619.899   1
   5  11  -3 3569.71 1629.28   1
   5  11  -3  276.02 614.008   1
   5  11  -3  669.21 473.488   1
   5  11  -3  245.25 317.477   1
  -5  11   3 1427.45 741.435   1
  -5  11   3   43.99 375.300   1
  -5  11   3  932.79 559.458   1
   5 -11  -2 1770.45 470.870   1
   5 -11  -2 1715.03 335.588   1
   5 -11  -2 4538.51 1584.11   1
   5 -11  -2 2098.62 562.731   1
  -5 -11   2 1440.32 314.204   1
  -5 -11   2 1356.97 469.561   1
  -5 -11   2 4665.06 1909.88   1
  -5 -11   2  322.71 463.233   1
   5  11  -2 1395.37 303.949   1
   5  11  -2 2360.90 674.448   1
   5  11  -2 1806.24 583.678   1
   5  11  -2 4601.78 1881.95   1
  -5  11   2 4726.16 1716.34   1
  -5  11   2 1988.65 717.215   1
  -5  11   2  876.28 364.390   1
  -5  11   2 2404.54 420.248   1
   5 -11  -1  327.95 315.732   1
   5 -11  -1 2758.02 1006.33   1
   5 -11  -1  533.93 148.462   1
  -5 -11   1 3676.63 1488.32   1
  -5 -11   1   64.11 222.125   1
  -5 -11   1  345.62 426.794   1
  -5 -11   1  480.03 374.209   1
   5  11  -1  699.54 399.301   1
   5  11  -1 2284.53 1121.53   1
   5  11  -1  452.32 202.247   1
   5  11  -1  229.76 406.938   1
  -5  11   1  469.12 138.403   1
  -5  11   1 3427.88 1320.31   1
  -5  11   1 1080.08 493.999   1
  -5  11   1  254.20 260.746   1
   5 -11   0 3999.56 779.401   1
   5 -11   0 4180.66 587.824   1
   5 -11   0 5633.86 1948.72   1
   5 -11   0 5254.19 1150.77   1
  -5 -11   0 3787.91 556.185   1
  -5 -11   0 3938.46 938.031   1
  -5 -11   0 8496.61 2950.03   1
  -5 -11   0 4307.22 864.935   1
   5  11   0 7706.73 2714.38   1
   5  11   0 4302.85 619.244   1
   5  11   0 3323.15 703.687   1
   5  11   0 4555.96 1060.66   1
  -5  11   0 6332.09 2234.34   1
  -5  11   0 6463.01 1396.46   1
  -5  11   0 3713.72 723.543   1
  -5  11   0 3473.70 491.817   1
   5 -11   1  24045. 4359.59   1
   5 -11   1  17061. 2356.53   1
   5 -11   1  39472.  13249.   1
   5 -11   1  25245. 5343.66   1
  -5 -11  -1  18647. 2535.45   1
  -5 -11  -1  22714. 4833.07   1
  -5 -11  -1  31202.  10476.   1
  -5 -11  -1  23914. 4329.04   1
   5  11   1  20179. 2740.56   1
   5  11   1  22823. 4870.17   1
   5  11   1  21804. 3953.74   1
   5  11   1  33755.  11342.   1
  -5  11  -1  37770.  12701.   1
  -5  11  -1  18296. 3883.91   1
  -5  11  -1  22671. 4110.84   1
   5 -11   2  12516. 2378.35  -1
   5 -11   2 7383.80 2642.37  -1
   5 -11   2  10172. 2172.59  -1
  -5 -11  -2  10480. 1946.98  -1
  -5 -11  -2  13325. 1827.62  -1
  -5 -11  -2 7447.08 2579.09  -1
  -5 -11  -2  12754. 2749.29  -1
   5  11   2  11704. 1606.59  -1
   5  11   2 7665.28 1759.76  -1
   5  11   2  13821. 2537.64  -1
   5  11   2 7307.43 2563.82  -1
  -5  11  -2 6661.57 2461.27  -1
  -5  11  -2  12064. 2566.00  -1
  -5  11  -2  12605. 2395.81  -1
   5 -11   3  12025. 4198.12   1
   5 -11   3 9797.07 1956.58   1
   5 -11   3 7554.00 1632.77   1
  -5 -11  -3 7032.50 1215.58   1
  -5 -11  -3  11992. 4071.56   1
  -5 -11  -3 7783.10 1493.13   1
  -5 -11  -3  10508. 2288.89   1
   5  11   3 8485.70 1969.89   1
   5  11   3  10332. 3556.62   1
   5  11   3 6777.21 965.524   1
   5  11   3 8845.73 1667.25   1
  -5  11  -3  11150. 3910.10   1
  -5  11  -3 7986.03 1721.58   1
  -5  11  -3 6443.37 1485.27   1
   5 -11   4 4158.84 1580.84   1
   5 -11   4 2936.94 721.797   1
  -5 -11  -4 2502.72 651.538   1
  -5 -11  -4 7728.55 2653.28   1
  -5 -11  -4 -683.61 2967.49   1
  -5 -11  -4 2971.85 813.658   1
   5  11   4 1835.04 406.720   1
   5  11   4 7711.10 2662.01   1
   5  11   4 2463.45 1099.06   1
   5  11   4 3083.13 757.145   1
  -5  11  -4  10299. 3663.54   1
  -5  11  -4 2672.92 704.123   1
  -5  11  -4  909.67 1604.41   1
   5 -11   5  -16.21 1116.30   1
   5 -11   5  557.71 420.903   1
  -5 -11  -5 -1496.6 2312.89   1
  -5 -11  -5  136.07 470.652   1
  -5 -11  -5  122.28 469.779   1
   5  11   5  636.05 591.097   1
   5  11   5  147.20 417.630   1
   5  11   5  644.34 534.802   1
  -5  11  -5 -503.16 1154.92   1
  -5  11  -5 1096.22 468.906   1
  -5  11  -5 -3441.0 2007.42   1
  -5 -11  -6  133.32 484.617   1
  -5 -11  -6  502.51 499.454   1
   5  11   6 -613.79 630.809   1
   5  11   6  -40.58 545.057   1
  -5  11  -6  843.99 1060.00   1
   5 -11   7 1105.61 569.714   1
  -5 -11  -7 1668.34 659.611   1
  -5 -11  -7 2548.55 1021.60   1
   5  11   7 1457.34 732.489   1
   5  11   7 1328.60 723.325   1
  -5  11  -7 1924.07 776.783   1
  -5 -11  -8 2478.72 1002.18   1
  -5 -11  -8 2301.98 837.442   1
   5  11   8  646.96 587.388   1
   5  11   8  295.66 921.884   1
  -5 -11  -9 1015.71 704.123   1
  -5 -11  -9  425.70 793.584   1
   5  11   9 2559.46 1087.50   1
   5  11   9   72.77 1074.62   1
  -5 -11 -10  205.32 650.010   1
  -5 -11 -10  624.04 776.347   1
   5  11  10 1056.29 759.764   1
   5  11  10 -648.26 1181.98   1
  -5 -11 -11  675.10 582.151   1
  -5 -11 -11  239.36 672.485   1
   5  11  11 -2084.9 1186.78   1
  -5 -11 -12   34.06 616.190   1
   5  11  12 -1419.8 1142.70   1
  -5 -13  12 -443.16 617.499   1
   5  13 -12 -951.78 703.687   1
   5 -13 -11  511.89 777.001   1
  -5 -13  11  839.19 803.839   1
  -5 -13  11  527.38 856.643   1
  -5 -13  11 -428.32 573.859   1
   5  13 -11  -57.36 756.054   1
   5  13 -11 1116.95 701.941   1
   5  13 -11  933.45 910.974   1
  -5  13  11  583.46 842.679   1
   5 -13 -10  750.82 901.156  -1
  -5 -13  10 1017.45 851.188  -1
  -5 -13  10  -18.28 838.533  -1
  -5 -13  10  703.03 542.221  -1
   5  13 -10 1045.38 653.720  -1
   5  13 -10 1595.24 944.140  -1
   5  13 -10  129.83 953.523  -1
  -5  13  10 -333.41 952.650  -1
   5 -13  -9  396.46 854.898   1
  -5 -13   9 1681.87 1041.24   1
  -5 -13   9 1879.33 1361.99   1
  -5 -13   9  422.87 492.253   1
   5  13  -9 1438.58 674.885   1
   5  13  -9  158.35 943.049   1
   5  13  -9 1141.61 1035.13   1
  -5  13   9  -61.84 1119.79   1
   5 -13  -8  918.83 822.604   1
   5 -13  -8  811.48 570.805   1
  -5 -13   8 1094.26 1176.74   1
  -5 -13   8 -803.84 924.066   1
  -5 -13   8  395.16 482.871   1
   5  13  -8  318.13 833.514   1
   5  13  -8  145.49 530.656   1
   5  13  -8  928.65 919.048   1
  -5  13   8  642.37 606.371   1
  -5  13   8   63.78 957.450   1
   5 -13  -7  137.55 745.581   1
   5 -13  -7  234.56 481.780   1
  -5 -13   7 -922.32 1265.55   1
  -5 -13   7 -773.07 871.044   1
  -5 -13   7  280.82 431.376   1
   5  13  -7  350.86 952.432   1
   5  13  -7  112.85 492.908   1
   5  13  -7  244.60 898.319   1
  -5  13   7 1212.74 716.997   1
  -5  13   7  -65.11 875.626   1
   5 -13  -6  401.48 457.124   1
   5 -13  -6 -139.65 698.450   1
  -5 -13   6 2186.34 1495.74   1
  -5 -13   6 1181.32 859.916   1
  -5 -13   6  489.85 389.482   1
   5  13  -6  816.71 483.526   1
   5  13  -6 -320.97 765.873   1
   5  13  -6 -509.93 888.064   1
   5  13  -6  967.49 672.266   1
  -5  13   6 -268.16 464.324   1
  -5  13   6 -290.20 660.266   1
   5 -13  -5 -208.23 518.001   1
   5 -13  -5  348.02 431.595   1
  -5 -13   5  408.90 372.245   1
  -5 -13   5  646.52 637.355   1
  -5 -13   5 -117.76 1238.27   1
  -5 -13   5  325.77 812.567   1
   5  13  -5 1502.29 956.141   1
   5  13  -5 -183.44 607.025   1
   5  13  -5  596.33 474.143   1
   5  13  -5 -109.14 800.348   1
  -5  13   5  319.88 521.710   1
  -5  13   5 -441.85 503.818   1
   5 -13  -4 4601.78 969.233   1
   5 -13  -4 5609.86 1934.32   1
  -5 -13   4 2439.45 609.644   1
  -5 -13   4 3473.70 1643.68   1
  -5 -13   4 4012.65 1020.51   1
  -5 -13   4 3410.43 799.912   1
   5  13  -4 4313.76 1059.79   1
   5  13  -4 6196.81 2301.98   1
   5  13  -4 3388.61 948.723   1
   5  13  -4 2888.93 647.174   1
  -5  13   4 5891.33 2039.27   1
  -5  13   4 3709.36 815.404   1
   5 -13  -3  494.22 470.652   1
   5 -13  -3  506.00 409.775   1
   5 -13  -3   46.21 476.980   1
  -5 -13   3  564.48 355.225   1
  -5 -13   3  260.53 958.541   1
  -5 -13   3  434.65 384.028   1
  -5 -13   3  912.72 698.886   1
   5  13  -3   85.08 784.202   1
   5  13  -3  468.91 324.023   1
   5  13  -3  657.43 481.344   1
   5  13  -3  353.48 639.973   1
  -5  13   3  378.57 502.509   1
  -5  13   3  858.83 447.523   1
  -5  13   3  -49.42 370.281   1
   5 -13  -2  10264. 1913.37  -1
   5 -13  -2  10500. 1449.70  -1
   5 -13  -2 8193.31 2782.02  -1
   5 -13  -2 9334.49 2035.78  -1
  -5 -13   2 7639.09 2731.83  -1
  -5 -13   2 9375.95 1303.95  -1
  -5 -13   2 8459.52 1636.04  -1
  -5 -13   2 9090.11 1969.45  -1
   5  13  -2 9633.42 1332.31  -1
   5  13  -2 7992.57 1767.40  -1
   5  13  -2 6663.75 2389.26  -1
   5  13  -2 8592.62 1656.12  -1
  -5  13   2  10231. 3491.16  -1
  -5  13   2 9631.24 2170.19  -1
  -5  13   2  10823. 1995.63  -1
  -5  13   2 9803.61 1351.08  -1
   5 -13  -1  672.92 376.827   1
   5 -13  -1 1065.89 184.508   1
   5 -13  -1  706.52 459.742   1
   5 -13  -1  350.64 443.377   1
  -5 -13   1 1011.13 289.766   1
  -5 -13   1 1316.17 495.745   1
  -5 -13   1 1093.61 814.968   1
  -5 -13   1  788.13 482.871   1
   5  13  -1  538.73 217.303   1
   5  13  -1 1377.48 528.038   1
   5  13  -1  473.49 404.320   1
   5  13  -1 1765.65 919.484   1
  -5  13   1 1106.04 683.831   1
  -5  13   1 1965.74 693.868   1
  -5  13   1  611.83 307.004   1
  -5  13   1  968.58 163.321   1
   5 -13   0  919.27 598.952   1
   5 -13   0 3161.68 646.956   1
   5 -13   0 2195.07 336.024   1
   5 -13   0 1920.79 531.747   1
  -5 -13   0 2238.71 359.589   1
  -5 -13   0 3897.01 818.677   1
  -5 -13   0 2408.90 679.685   1
  -5 -13   0 1847.91 909.011   1
   5  13   0 3037.31 1229.76   1
   5  13   0 2788.56 421.776   1
   5  13   0 2742.74 628.627   1
   5  13   0 3238.05 836.133   1
  -5  13   0 1332.31 761.073   1
  -5  13   0 1830.24 499.236   1
  -5  13   0 3270.78 665.502   1
  -5  13   0 1995.63 291.730   1
   5 -13   1 2188.52 962.033   1
   5 -13   1 1500.54 485.053   1
   5 -13   1 1260.96 380.536   1
  -5 -13  -1 1675.97 510.800   1
  -5 -13  -1 1228.45 227.144   1
  -5 -13  -1 2644.55 767.619   1
  -5 -13  -1 1161.25 654.811   1
   5  13   1 1394.06 235.435   1
   5  13   1 1654.59 840.278   1
   5  13   1 1098.62 620.990   1
   5  13   1 2177.61 541.348   1
  -5  13  -1 2561.64 1108.44   1
  -5  13  -1  492.04 431.813   1
  -5  13  -1 2559.46 635.827   1
   5 -13   2  514.07 735.544   1
   5 -13   2 -229.33 535.457   1
   5 -13   2 1223.43 379.227   1
  -5 -13  -2  324.46 427.012   1
  -5 -13  -2  727.25 221.034   1
  -5 -13  -2 1008.51 569.932   1
  -5 -13  -2  381.63 551.603   1
   5  13   2 1228.45 248.091   1
   5  13   2  477.85 664.630   1
   5  13   2  304.60 394.501   1
   5  13   2  931.92 805.585   1
  -5  13  -2 1875.19 1015.05   1
  -5  13  -2  496.18 371.154   1
  -5  13  -2 -330.13 526.729   1
  -5  13  -2 1386.64 366.572   1
   5 -13   3 2253.98 1229.54   1
   5 -13   3  269.47 717.215   1
   5 -13   3  474.36 341.697   1
  -5 -13  -3  394.50 481.125   1
  -5 -13  -3  -81.80 406.720   1
  -5 -13  -3   40.67 545.057   1
  -5 -13  -3  885.88 626.445   1
   5  13   3  362.21 207.877   1
   5  13   3  619.68 600.043   1
   5  13   3   54.18 784.856   1
   5  13   3  642.37 487.890   1
  -5  13  -3 1221.91 987.998   1
  -5  13  -3 -570.80 736.635   1
  -5  13  -3  -36.90 333.188   1
   5 -13   4 1103.21 1207.50   1
   5 -13   4  439.23 934.758   1
   5 -13   4  449.49 360.899   1
  -5 -13  -4  340.39 422.648   1
  -5 -13  -4 1810.17 1706.96   1
  -5 -13  -4 -109.34 515.601   1
  -5 -13  -4  409.12 505.782   1
   5  13   4  273.84 197.491   1
   5  13   4 1214.92 678.158   1
   5  13   4 -882.83 924.284   1
   5  13   4  397.56 490.072   1
  -5  13  -4   72.49 861.662   1
  -5  13  -4 -1206.9 895.482   1
  -5  13  -4  930.83 415.230   1
   5 -13   5 -349.77 854.461   1
   5 -13   5 -315.95 870.390   1
   5 -13   5   14.72 375.300   1
  -5 -13  -5  368.75 1273.84   1
  -5 -13  -5 -117.35 513.200   1
  -5 -13  -5 -350.64 541.784   1
  -5 -13  -5  -20.10 476.761   1
   5  13   5   -2.68 253.327   1
   5  13   5  748.20 921.884   1
   5  13   5 -751.91 532.184   1
   5  13   5 -118.76 563.604   1
  -5  13  -5   14.66 763.473   1
  -5  13  -5  182.61 1000.65   1
  -5  13  -5  139.60 474.798   1
   5 -13   6   86.58 774.383   1
   5 -13   6 1007.85 874.754   1
   5 -13   6  979.49 513.855   1
  -5 -13  -6  937.59 1055.64   1
  -5 -13  -6  498.14 518.219   1
  -5 -13  -6  147.15 531.529   1
   5  13   6  420.25 540.257   1
   5  13   6  373.34 535.020   1
  -5  13  -6 1106.04 882.609   1
  -5  13  -6  223.87 485.708   1
  -5  13  -6 -1189.0 1064.37   1
   5 -13   7 -243.73 825.005   1
   5 -13   7 2587.82 721.579   1
  -5 -13  -7 1986.47 725.070   1
   5  13   7  826.10 640.846   1
   5  13   7 2415.45 760.855   1
  -5  13  -7 1056.29 973.379   1
  -5  13  -7 1442.72 575.823   1
   5 -13   8 4329.04 1091.42   1
  -5 -13  -8 2954.39 855.334   1
  -5 -13  -8 6746.67 2345.62   1
   5  13   8 7187.42 2498.36   1
   5  13   8 2288.89 834.605   1
  -5  13  -8 2041.67 887.409   1
   5 -13   9 1091.86 612.480   1
  -5 -13  -9  745.80 666.593   1
  -5 -13  -9 1090.11 592.843   1
   5  13   9  169.87 839.624   1
   5  13   9 1734.23 813.877   1
  -5  13  -9 -355.23 735.107   1
   5 -13  10   20.58 526.510   1
  -5 -13 -10 1351.08 698.014   1
  -5 -13 -10  912.94 727.252   1
   5  13  10 1065.46 701.287   1
   5  13  10 -558.80 1025.53   1
  -5 -13 -11 1040.37 726.379  -1
   5  13  11 1511.67 872.572  -1
   5 -15 -10  773.95 637.791   1
  -5 -15  10  533.49 783.329   1
  -5 -15  10  326.42 578.223   1
   5  15 -10 -920.14 691.904   1
   5  15 -10 1489.85 683.831   1
   5 -15  -9 1269.25 680.558   1
   5 -15  -9  313.99 715.251   1
  -5 -15   9  121.97 876.499   1
  -5 -15   9 -806.68 773.292   1
  -5 -15   9  284.53 574.296   1
   5  15  -9  196.33 630.809   1
   5  15  -9 1063.49 639.100   1
   5  15  -9 -504.47 794.893   1
  -5  15   9  323.37 575.387   1
  -5  15   9 -163.65 808.858   1
   5 -15  -8   12.74 736.853   1
   5 -15  -8 -309.40 462.579   1
  -5 -15   8  130.61 801.876   1
  -5 -15   8  157.47 489.199   1
  -5 -15   8 -626.44 781.583   1
   5  15  -8 1210.12 787.038   1
   5  15  -8  361.34 610.080   1
   5  15  -8   72.66 728.561   1
  -5  15   8 -249.18 556.840   1
  -5  15   8 -388.83 841.369   1
   5 -15  -7  273.18 738.817   1
   5 -15  -7  610.08 459.960   1
  -5 -15   7  -99.76 849.443   1
  -5 -15   7  -54.88 790.748   1
  -5 -15   7 -379.45 455.378   1
   5  15  -7   80.12 581.933   1
   5  15  -7  600.70 572.987   1
   5  15  -7  535.24 705.869   1
  -5  15   7  658.74 540.911   1
  -5  15   7   94.26 737.071   1
   5 -15  -6 -411.52 569.714   1
   5 -15  -6  475.02 452.978   1
  -5 -15   6 -449.92 1025.09   1
  -5 -15   6 -1224.3 841.151   1
  -5 -15   6   50.03 490.726   1
   5  15  -6  -55.44 901.810   1
   5  15  -6 -358.72 577.132   1
   5  15  -6   49.47 667.248   1
   5  15  -6 -779.18 755.181   1
  -5  15   6  582.37 625.572   1
  -5  15   6 -560.11 577.787   1
   5 -15  -5  204.69 527.165   1
   5 -15  -5   -8.92 414.793   1
  -5 -15   5 -604.63 1158.19   1
  -5 -15   5  -12.17 783.329   1
  -5 -15   5  -72.53 395.592   1
  -5 -15   5  371.15 581.714   1
   5  15  -5  214.73 844.861   1
   5  15  -5 -147.35 554.440   1
   5  15  -5  296.09 602.443   1
   5  15  -5 -239.14 695.832   1
  -5  15   5 -410.43 560.549   1
  -5  15   5  320.53 499.672   1
   5 -15  -4  850.97 561.204   1
   5 -15  -4 1222.78 554.440   1
  -5 -15   4 -292.60 1037.97   1
  -5 -15   4 1935.19 927.776   1
  -5 -15   4  603.97 382.937   1
  -5 -15   4  993.45 452.978   1
   5  15  -4  388.39 813.004   1
   5  15  -4  713.94 456.251   1
   5  15  -4 1659.17 687.758   1
   5  15  -4 1222.34 802.530   1
  -5  15   4 1190.92 675.539   1
  -5  15   4  893.30 509.927   1
   5 -15  -3  341.04 488.108   1
   5 -15  -3  727.03 368.535   1
   5 -15  -3  154.57 446.432   1
   5 -15  -3  428.98 449.487   1
  -5 -15   3  491.38 369.626   1
  -5 -15   3   38.53 368.317   1
  -5 -15   3  -64.63 838.969   1
  -5 -15   3 1347.81 790.529   1
   5  15  -3  508.62 322.714   1
   5  15  -3  299.37 526.510   1
   5  15  -3  416.10 607.244   1
   5  15  -3  710.89 785.074   1
  -5  15   3  413.27 674.885   1
  -5  15   3  909.45 619.026   1
  -5  15   3 -305.69 416.975   1
   5 -15  -2 1001.31 557.276   1
   5 -15  -2 1938.03 634.518   1
   5 -15  -2  450.36 513.419   1
   5 -15  -2  907.70 227.362   1
  -5 -15   2  463.89 787.038   1
  -5 -15   2 1058.48 290.857   1
  -5 -15   2  770.24 557.931   1
  -5 -15   2 1730.74 553.785   1
   5  15  -2 1109.97 581.933   1
   5  15  -2 2068.51 644.337   1
   5  15  -2  746.67 826.096   1
   5  15  -2 1464.10 301.112   1
  -5  15   2 1190.49 413.921   1
  -5  15   2 1207.94 769.582   1
  -5  15   2  768.71 195.330   1
  -5  15   2 3006.76 945.668   1
   5 -15  -1 4156.66 934.322   1
   5 -15  -1 3478.07 482.871   1
   5 -15  -1 2084.44 817.804   1
   5 -15  -1 3517.34 909.883   1
  -5 -15   1 3017.67 1263.15   1
  -5 -15   1 2995.85 481.562   1
  -5 -15   1 4774.16 1013.09   1
  -5 -15   1 2675.10 715.251   1
   5  15  -1 2723.10 433.558   1
   5  15  -1 2568.18 780.929   1
   5  15  -1 3925.37 834.605   1
   5  15  -1  824.57 730.089   1
  -5  15   1 1194.41 749.945   1
  -5  15   1 3272.96 707.396   1
  -5  15   1 3626.44 949.159   1
  -5  15   1 3220.59 446.650   1
   5 -15   0  344.97 330.787   1
   5 -15   0  365.26 498.145   1
   5 -15   0  361.77 157.211   1
   5 -15   0  526.29 420.248   1
  -5 -15   0  622.74 192.385   1
  -5 -15   0 1541.78 821.732   1
  -5 -15   0  824.57 397.992   1
   5  15   0 1141.17 807.331   1
   5  15   0  457.34 164.368   1
   5  15   0 1223.00 422.867   1
   5  15   0 1413.27 626.227   1
  -5  15   0  744.93 703.032   1
  -5  15   0 1559.46 490.072   1
  -5  15   0  252.24 265.328   1
  -5  15   0  401.27 102.553   1
   5 -15   1  554.00 637.137   1
   5 -15   1 1056.51 499.018   1
   5 -15   1  228.67 309.404   1
   5 -15   1   -4.79 256.818   1
  -5 -15  -1  297.62 527.820   1
  -5 -15  -1  305.26 138.359   1
  -5 -15  -1  148.79 451.232   1
  -5 -15  -1 1154.05 569.495   1
   5  15   1  232.38 121.798   1
   5  15   1  211.35 633.427   1
   5  15   1  733.58 435.304   1
   5  15   1 1528.91 849.661   1
  -5  15  -1 1233.47 851.625   1
  -5  15  -1 1007.20 511.455   1
  -5  15  -1  938.69 409.993   1
  -5  15  -1  806.46 236.962   1
   5 -15   2  658.30 740.344   1
   5 -15   2 1424.39 807.331   1
   5 -15   2  908.79 379.445   1
  -5 -15  -2  203.80 515.819   1
  -5 -15  -2  444.03 532.620   1
  -5 -15  -2  551.60 208.488   1
  -5 -15  -2 1817.37 834.605   1
   5  15   2  318.57 154.615   1
   5  15   2  675.98 778.529   1
   5  15   2  544.62 822.823   1
   5  15   2  573.42 406.065   1
  -5  15  -2 2893.30 1247.22   1
  -5  15  -2 1166.92 694.086   1
  -5  15  -2 -183.55 401.483   1
   5 -15   3 1555.31 960.505   1
   5 -15   3   11.81 869.299   1
   5 -15   3  836.35 427.667   1
  -5 -15  -3  783.55 510.800   1
  -5 -15  -3  176.46 301.985   1
  -5 -15  -3 1659.17 691.686   1
  -5 -15  -3  404.97 531.965   1
   5  15   3  514.29 202.487   1
   5  15   3 1178.70 806.458   1
   5  15   3 1006.54 991.271   1
   5  15   3  675.32 419.157   1
  -5  15  -3 2150.55 1147.72   1
  -5  15  -3  584.55 773.510   1
  -5  15  -3 1104.08 471.961   1
   5 -15   4 1956.79 1076.15   1
   5 -15   4 -394.50 898.319   1
   5 -15   4  249.62 435.522   1
  -5 -15  -4  323.37 1421.77   1
  -5 -15  -4  824.57 596.115   1
  -5 -15  -4  394.50 511.455   1
  -5 -15  -4  672.70 579.096   1
   5  15   4 1149.46 967.924   1
   5  15   4 -181.17 604.625   1
   5  15   4  125.16 215.099   1
   5  15   4 -114.31 403.884   1
  -5  15  -4 -1378.1 997.599   1
  -5  15  -4  119.99 342.134   1
  -5  15  -4  838.53 792.930   1
   5 -15   5  409.56 840.715   1
   5 -15   5  556.19 939.122   1
   5 -15   5  492.25 409.775   1
  -5 -15  -5  437.27 481.562   1
  -5 -15  -5 -771.33 1347.15   1
  -5 -15  -5 -827.40 549.858   1
  -5 -15  -5   57.06 535.020   1
   5  15   5   87.61 631.027   1
   5  15   5  987.78 1118.70   1
   5  15   5 -138.27 277.547   1
   5  15   5 -634.30 482.653   1
  -5  15  -5 -280.82 835.696   1
  -5  15  -5  291.51 375.518   1
  -5  15  -5 -361.77 938.904   1
   5 -15   6 -458.21 823.914   1
   5 -15   6 -1073.7 869.735   1
   5 -15   6  550.95 480.034   1
  -5 -15  -6 -575.17 892.209   1
  -5 -15  -6  441.85 534.147   1
  -5 -15  -6  696.05 545.930   1
   5  15   6  591.75 667.684   1
   5  15   6  479.60 278.202   1
   5  15   6 -167.73 516.255   1
  -5  15  -6  454.94 821.732   1
  -5  15  -6 1137.68 1045.82   1
  -5  15  -6  863.84 508.836   1
   5 -15   7 1628.63 825.659   1
   5 -15   7  -48.57 668.557   1
   5 -15   7   79.21 513.637   1
  -5 -15  -7  428.98 563.822   1
  -5 -15  -7  -45.36 406.065   1
   5  15   7 -700.85 613.353   1
   5  15   7  283.44 563.168   1
  -5  15  -7  267.07 687.104   1
  -5  15  -7  374.21 488.981   1
  -5  15  -7 -291.73 1105.17   1
   5 -15   8 -711.11 704.996  -1
   5 -15   8 -593.93 584.551  -1
  -5 -15  -8  434.87 492.253  -1
  -5 -15  -8 -145.34 608.989  -1
   5  15   8  317.26 612.262  -1
   5  15   8  274.27 700.414  -1
  -5  15  -8 -400.39 678.812  -1
  -5  15  -8 -409.77 539.602  -1
  -5  15  -8 -1371.8 1000.65  -1
   5 -15   9  196.25 554.003   1
  -5 -15  -9  116.19 579.751   1
   5  15   9 1106.48 737.071   1
  -5  15  -9   59.55 615.753   1
  -5  15  -9  202.90 573.423   1
   5 -17  -7   17.59 473.052   1
  -5 -17   7  159.00 800.348   1
  -5 -17   7  184.64 541.348   1
   5  17  -7   47.33 528.256   1
   5  17  -7  717.22 559.895   1
  -5  17   7 -119.70 555.749   1
   5 -17  -6  996.51 559.022   1
  -5 -17   6 -541.13 748.417   1
  -5 -17   6  731.18 531.093   1
  -5 -17   6   36.35 452.105   1
   5  17  -6   96.62 536.329   1
   5  17  -6 -851.62 627.318   1
   5  17  -6  243.29 523.892   1
  -5  17   6  591.97 575.823   1
   5 -17  -5  563.17 566.222   1
   5 -17  -5  657.65 509.491   1
  -5 -17   5  -84.75 473.707   1
  -5 -17   5  339.30 764.564   1
  -5 -17   5  179.97 707.178   1
  -5 -17   5  591.97 494.435   1
   5  17  -5  578.88 701.068   1
   5  17  -5  -30.15 695.832   1
   5  17  -5 1139.21 685.795   1
   5  17  -5 -608.12 439.013   1
  -5  17   5 -243.29 544.621   1
  -5  17   5  412.17 562.949   1
   5 -17  -4  138.58 511.018   1
   5 -17  -4 -112.07 389.482   1
  -5 -17   4 -101.66 453.414   1
  -5 -17   4  232.82 327.733   1
  -5 -17   4 1499.89 1004.58   1
  -5 -17   4   -0.97 697.577   1
   5  17  -4  762.60 734.453   1
   5  17  -4  552.69 404.538   1
   5  17  -4  745.80 673.139   1
   5  17  -4 -214.27 637.573   1
  -5  17   4 -353.26 615.317   1
  -5  17   4  382.06 500.109   1
   5 -17  -3 1072.00 567.095  -1
   5 -17  -3  412.61 259.873  -1
   5 -17  -3  647.61 472.179  -1
   5 -17  -3  -63.12 608.116  -1
  -5 -17   3 -644.56 751.690  -1
  -5 -17   3  279.73 272.529  -1
  -5 -17   3  -43.70 556.622  -1
  -5 -17   3  421.99 416.975  -1
   5  17  -3   86.65 544.403  -1
   5  17  -3  191.90 704.341  -1
   5  17  -3   81.39 305.258  -1
   5  17  -3  989.74 564.695  -1
  -5  17   3 -328.17 562.513  -1
  -5  17   3 -259.44 675.321  -1
  -5  17   3  -33.21 371.154  -1
   5 -17  -2  160.05 638.882   1
   5 -17  -2  788.13 211.084   1
   5 -17  -2  744.93 461.706   1
   5 -17  -2  459.52 540.039   1
  -5 -17   2  585.64 737.726   1
  -5 -17   2  698.45 247.436   1
  -5 -17   2 -506.87 513.419   1
  -5 -17   2  874.10 450.360   1
   5  17  -2 1520.84 632.773   1
   5  17  -2   84.88 776.565   1
   5  17  -2  545.93 261.619   1
   5  17  -2  344.10 499.454   1
  -5  17   2  232.38 591.315   1
  -5  17   2  221.47 592.624   1
  -5  17   2  846.61 446.868   1
   5 -17  -1  360.03 531.529   1
   5 -17  -1  910.54 143.050   1
   5 -17  -1 1435.96 631.900   1
   5 -17  -1 2121.97 713.069   1
  -5 -17   1 1254.64 764.782   1
  -5 -17   1  693.65 249.182   1
  -5 -17   1  309.84 457.996   1
  -5 -17   1 1804.49 610.953   1
   5  17  -1 1018.98 576.478   1
   5  17  -1  912.72 413.921   1
   5  17  -1 2018.11 1018.33   1
   5  17  -1  873.01 257.691   1
  -5  17   1 1602.01 489.417   1
  -5  17   1  931.05 673.139   1
  -5  17   1  722.67 128.649   1
  -5  17   1 1074.40 579.969   1
   5 -17   0  519.75 346.716   1
   5 -17   0  294.57 205.957   1
   5 -17   0   15.42 526.074   1
   5 -17   0  611.83 478.943   1
  -5 -17   0 1275.80 673.357   1
  -5 -17   0  390.14 163.321   1
  -5 -17   0 -286.28 323.587   1
  -5 -17   0  221.25 565.131   1
   5  17   0 1090.33 624.481   1
   5  17   0  -83.44 308.313   1
   5  17   0 1403.45 815.186   1
   5  17   0  -76.67 141.894   1
  -5  17   0 -275.15 275.365   1
  -5  17   0  923.85 730.307   1
  -5  17   0  234.13  92.210   1
  -5  17   0  422.21 349.552   1
   5 -17   1 1257.04 741.871   1
   5 -17   1  305.04 543.748   1
   5 -17   1 1669.43 473.052   1
  -5 -17  -1 1600.04 255.073   1
  -5 -17  -1 1997.82 815.840   1
  -5 -17  -1 1838.53 583.242   1
  -5 -17  -1 1107.57 663.975   1
   5  17   1 1664.85 262.710   1
   5  17   1  378.35 732.925   1
   5  17   1  774.60 411.520   1
   5  17   1 1987.78 913.375   1
  -5  17  -1  827.84 814.749   1
  -5  17  -1 1393.85 593.061   1
  -5  17  -1 1675.97 517.564   1
  -5  17  -1 1902.68 328.387   1
   5 -17   2  392.76 676.412   1
   5 -17   2 1186.34 756.491   1
   5 -17   2  819.77 396.465   1
  -5 -17  -2  719.18 594.806   1
  -5 -17  -2 -308.75 589.351   1
  -5 -17  -2  418.94 198.189   1
  -5 -17  -2 1722.67 739.471   1
   5  17   2  437.05 172.943   1
   5  17   2  923.41 708.051   1
   5  17   2  873.23 853.807   1
   5  17   2  983.20 496.399   1
  -5  17  -2 3244.60 1388.17   1
  -5  17  -2   63.21 557.495   1
  -5  17  -2  926.03 464.979   1
   5 -17   3 1250.49 813.658   1
   5 -17   3  522.80 716.560   1
   5 -17   3  254.42 423.521   1
  -5 -17  -3 -219.72 599.825   1
  -5 -17  -3 -322.93 240.017   1
  -5 -17  -3 -1016.8 653.501   1
  -5 -17  -3  176.78 474.798   1
   5  17   3  219.72 163.190   1
   5  17   3  303.08 641.064   1
   5  17   3  112.48 899.192   1
   5  17   3 -614.88 476.980   1
  -5  17  -3 1163.43 834.605   1
  -5  17  -3 1140.08 684.485   1
  -5  17  -3  530.44 471.961   1
   5 -17   4  377.26 695.832   1
   5 -17   4 -220.38 675.976   1
   5 -17   4  218.42 487.017   1
  -5 -17  -4  438.14 1030.76   1
  -5 -17  -4  -25.16 469.997   1
  -5 -17  -4   58.48 590.442   1
  -5 -17  -4  235.44 666.811   1
   5  17   4 -123.22 598.516   1
   5  17   4 -171.22 962.905   1
   5  17   4 -371.37 189.483   1
   5  17   4 -623.61 489.853   1
  -5  17  -4  445.12 720.488   1
  -5  17  -4  191.34 743.835   1
  -5  17  -4  259.87 396.683   1
   5 -17   5  -17.54 655.683   1
   5 -17   5  419.16 515.819   1
  -5 -17  -5 -753.00 1098.62   1
  -5 -17  -5  789.66 550.949   1
  -5 -17  -5 -280.82 634.082   1
   5  17   5  653.28 633.209   1
   5  17   5  320.97 982.761   1
   5  17   5  102.90 237.399   1
  -5  17  -5 -335.15 589.570   1
  -5  17  -5  847.04 439.886   1
   5 -17   6  247.00 729.871  -1
   5 -17   6 -257.25 487.453  -1
  -5 -17  -6 -239.14 828.278  -1
  -5 -17  -6 -1084.2 637.791  -1
  -5 -17  -6  537.20 537.420  -1
   5  17   6  299.37 270.347  -1
   5  17   6 -614.66 1036.22  -1
   5  17   6  547.24 638.664  -1
  -5  17  -6 -372.24 631.682  -1
  -5  17  -6  281.04 425.485  -1
  -5 -17  -7  356.32 752.345   1
  -5 -19   4  328.17 268.383   1
   5  19  -4   50.93 297.185   1
   5 -19  -3 -203.77 210.081   1
  -5 -19   3  273.84 222.125   1
   5  19  -3  131.09 223.871   1
   5 -19  -2  -69.41 134.279   1
  -5 -19   2   53.44 169.845   1
   5  19  -2  -42.02 195.985   1
  -5  19   2   74.71 112.808   1
   5 -19  -1  -26.69  66.987   1
  -5 -19   1  304.17 184.246   1
   5  19  -1   10.42 202.618   1
  -5  19   1   76.50  79.009   1
   5 -19   0 -132.99 132.249   1
  -5 -19   0  150.58 150.796   1
   5  19   0  210.28 169.801   1
  -5  19   0    7.57  72.420   1
  -5 -19  -1  552.04 148.178   1
   5  19   1  489.64 146.214   1
  -5  19  -1  841.59 165.328   1
  -5 -19  -2   -8.92 181.213   1
   5  19   2  109.10 136.199   1
  -5 -19  -3  -53.52 189.046   1
   5  19   3  277.77 137.464   1
  -5 -19  -4   83.55 342.134   1
   5  19   4   18.20 131.529   1
   6   0  -6 6783.76 1655.68   1
  -6   0   6 4195.94 1223.00   1
   6   0  -5 2225.61 828.059   1
   6   0  -5 5099.27 1242.42   1
  -6   0   5 1909.45 736.853   1
  -6   0   5 6037.52 1430.28   1
   6   0  -4  10585. 1551.60   1
   6   0  -4 7962.03 1756.71   1
  -6   0   4  12649. 1809.51   1
  -6   0   4  10945. 2373.99   1
   6   0  -3 113921.  20484.   1
   6   0  -3 102444.  13873.   1
   6   0  -3  93498.  19753.   1
  -6   0   3  93279.  12625.   1
  -6   0   3  94327.  19926.   1
  -6   0   3  93934.  16902.   1
   6   0  -2 1696.70 375.081   1
   6   0  -2 9146.84 3111.50   1
   6   0  -2 1170.85 629.718   1
   6   0  -2 5374.20 1168.23   1
  -6   0   2 7521.27 2598.73   1
  -6   0   2 1929.30 377.263   1
  -6   0   2  400.39 630.809   1
  -6   0   2 3458.43 775.910   1
   6   0  -1 267728.  47982.   1
   6   0  -1 292166.  97731.   1
   6   0  -1 293912.  62077.   1
   6   0  -1 225180.  30439.   1
  -6   0   1 331878. 111041.   1
  -6   0   1 236526.  31944.   1
  -6   0   1 240017.  50687.   1
  -6   0   1 295876.  53044.   1
   6   0   0 238272.  42723.   1
   6   0   0 382718. 128060.   1
   6   0   0 276456.  58346.   1
   6   0   0 215034.  29064.   1
  -6   0   0 362644. 121361.   1
  -6   0   0 221470.  29915.   1
  -6   0   0 267292.  56426.   1
  -6   0   0 247654.  44381.   1
   6   0   1  35086. 4763.25   1
   6   0   1 148571.  49705.   1
   6   0   1  33952. 6111.71   1
   6   0   1  60397.  12762.   1
  -6   0  -1  27864. 5029.45   1
  -6   0  -1 177198.  59284.   1
  -6   0  -1  51015.  10781.   1
  -6   0  -1  41676. 5644.77   1
   6   0   2 5714.59 866.898   1
   6   0   2  32861.  11023.   1
   6   0   2 7311.80 1414.36   1
  -6   0  -2  46432.  15555.   1
  -6   0  -2 6807.76 1323.59   1
  -6   0  -2 6569.93 994.108   1
   6   0   3  691.47 870.826   1
   6   0   3  776.56 729.216   1
  -6   0  -3 2384.90 2369.62   1
  -6   0  -3  289.98 662.884   1
   6   0   4  241.76 1617.72   1
   6   0   4 1573.64 1111.50   1
  -6   0  -4 9098.83 5786.60   1
  -6   0  -4 1504.04 933.231   1
  -6  -2   9   33.10 696.704   1
   6   2  -9 2768.93 989.526   1
   6  -2  -5  18833. 2742.74   1
  -6  -2   5  19358. 2782.02   1
   6   2  -5  18152. 2611.82   1
  -6   2   5  18510. 2659.83   1
   6  -2  -4 7820.20 1213.83   1
  -6  -2   4 8088.58 1904.86   1
  -6  -2   4 6489.19 1047.13   1
   6   2  -4 8841.36 1308.09   1
   6   2  -4 7113.24 1558.58   1
   6   2  -4 6617.93 1687.32   1
  -6   2   4 9077.01 1350.42   1
  -6   2   4 6801.21 1629.28   1
   6  -2  -3 1559.89 411.084   1
   6  -2  -3 2267.07 647.174   1
  -6  -2   3 1543.75 449.487   1
  -6  -2   3 1188.30 897.664   1
  -6  -2   3 2363.08 799.476   1
   6   2  -3 2299.80 461.051   1
   6   2  -3 2904.21 687.540   1
   6   2  -3 2140.08 773.292   1
   6   2  -3 2360.90 1053.24   1
  -6   2   3 2738.38 749.727   1
  -6   2   3 2199.43 452.978   1
   6  -2  -2 349552.  62688.   1
   6  -2  -2 371154.  50142.   1
   6  -2  -2 397556.  83962.   1
  -6  -2   2 357844.  48353.   1
  -6  -2   2 372027.  66703.   1
  -6  -2   2 326205. 109142.   1
   6   2  -2 373554. 124984.   1
   6   2  -2 382937.  51735.   1
   6   2  -2 368536.  66092.   1
   6   2  -2 411302.  86843.   1
  -6   2   2 445123.  93978.   1
  -6   2   2 322496.  57822.   1
  -6   2   2 363953.  49160.   1
   6  -2  -1 189548.  33995.   1
   6  -2  -1 198734.  66485.   1
   6  -2  -1 174689.  23609.   1
   6  -2  -1 142243.  30046.   1
  -6  -2   1 166965.  22562.   1
  -6  -2   1 177940.  59546.   1
  -6  -2   1 170478.  30591.   1
   6   2  -1 218067.  72965.   1
   6   2  -1 169692.  22933.   1
   6   2  -1 193105.  34628.   1
   6   2  -1 186297.  39341.   1
  -6   2   1 171132.  30700.   1
  -6   2   1 187606.  62775.   1
  -6   2   1 154091.  20827.   1
  -6   2   1 209950.  44338.   1
   6  -2   0 156426.  28060.  -1
   6  -2   0 176194.  23805.  -1
   6  -2   0 155422.  51996.  -1
   6  -2   0 159371.  33646.  -1
  -6  -2   0 149291.  20179.  -1
  -6  -2   0 119987.  40148.  -1
  -6  -2   0 131158.  23544.  -1
   6   2   0 138228.  18686.  -1
   6   2   0 122387.  40956.  -1
   6   2   0 146629.  30962.  -1
   6   2   0 135501.  24307.  -1
  -6   2   0 135632.  24329.  -1
  -6   2   0 114837.  38425.  -1
  -6   2   0 136221.  18412.  -1
  -6   2   0 153327.  32381.  -1
   6  -2   1 335588.  45341.   1
   6  -2   1 469125.  84115.   1
  -6  -2  -1 376609.  50862.   1
  -6  -2  -1 567095. 189745.   1
  -6  -2  -1 497272.  89134.   1
   6   2   1 478725. 160201.   1
   6   2   1 353480.  47720.   1
   6   2   1 406065.  72812.   1
  -6   2  -1 337551.  45581.   1
  -6   2  -1 402793.  72180.   1
   6  -2   2 2648.92 626.227   1
   6  -2   2 2085.53 790.748   1
  -6  -2  -2 4331.22 731.180   1
  -6  -2  -2 7060.87 2428.54   1
  -6  -2  -2 5241.10 1096.44   1
   6   2   2  10161. 3460.61   1
   6   2   2 2358.71 456.033   1
   6   2   2 4667.24 986.471   1
  -6   2  -2 3054.76 840.933   1
  -6   2  -2 2723.10 842.242   1
  -6  -2  -3 7392.53 2568.18   1
  -6  -2  -3  23129. 4215.58   1
   6   2   3 8337.33 2886.75   1
   6   2   3  24613. 4486.14   1
  -6   2  -3  20148. 3805.36   1
  -6   2  -3 2531.09 3375.51   1
   6  -2   4   91.71 1736.63   1
  -6  -2  -4 -5688.4 5533.49   1
  -6  -2  -4 2262.71 1076.59   1
  -6  -2  -4 2156.45 874.099   1
   6   2   4   -3.80 846.606   1
   6   2   4 2725.29 1142.48   1
   6   2   4 1549.64 1318.79   1
  -6   2  -4 -6190.3 7030.32   1
  -6  -2  -6 4329.04 1408.68   1
   6   2   6 2777.65 1487.45   1
  -6  -2  -7 4206.85 1887.84  -1
   6   2   7 1346.71 1735.54  -1
  -6  -2  -8 -636.70 1361.33   1
   6   2   8 -2537.6 1563.60   1
  -6  -4  11  339.73 610.953  -1
   6   4 -11 1570.59 932.576  -1
  -6  -4  10 1299.37 798.603   1
   6   4 -10  345.62 872.572   1
  -6  -4   9   59.70 648.919   1
   6   4  -9 1501.42 807.331   1
  -6  -4   8 -590.44 574.296  -1
   6   4  -8  267.95 509.055  -1
  -6  -4   7  303.51 558.367   1
   6   4  -7 -505.78 489.199   1
  -6  -4   6  12675. 3002.40   1
  -6  -4   6 8380.96 1837.44   1
   6   4  -6  10700. 2764.56   1
   6   4  -6 6375.73 1415.01   1
  -6  -4   5  23522. 3314.42  -1
  -6  -4   5  21737. 4145.75  -1
   6   4  -5  28846. 4014.83  -1
   6   4  -5  31268. 5801.87  -1
  -6   4   5  23413. 3283.87  -1
   6  -4  -4  28758. 3955.92   1
  -6  -4   4  26467. 3643.90   1
  -6  -4   4  28082. 5132.00   1
  -6  -4   4  25311. 5365.48   1
   6   4  -4  29500. 4047.56   1
   6   4  -4  23827. 4385.77   1
   6   4  -4  25813. 5470.21   1
  -6   4   4  20380. 2825.66   1
   6  -4  -3  31835. 4335.58   1
  -6  -4   3  32250. 4398.86   1
  -6  -4   3  34933. 6332.09   1
  -6  -4   3  37945. 8025.30   1
   6   4  -3  43116. 5852.06   1
   6   4  -3  36723. 7767.83   1
   6   4  -3  42439. 7684.91   1
  -6  -4   2  11523. 2155.35  -1
  -6  -4   2  17369. 3691.90  -1
   6   4  -2  10157. 1414.79  -1
   6   4  -2 9581.05 1812.13  -1
   6   4  -2  21693. 4601.78  -1
  -6   4   2  10048. 1393.41  -1
   6  -4  -1  51647. 6995.41   1
   6  -4  -1  45778. 9670.51   1
  -6  -4   1  53677. 7274.70   1
  -6  -4   1  43421. 7824.56   1
  -6  -4   1  39603. 8376.60   1
   6   4  -1  44469. 6030.98   1
   6   4  -1  52651. 9478.50   1
   6   4  -1  38883. 8223.86   1
  -6   4   1  46018. 6233.90   1
   6  -4   0 471525.  84639.   1
   6  -4   0 404756.  54658.   1
   6  -4   0 572768. 120990.   1
   6  -4   0 727470. 243508.   1
  -6  -4   0 430285.  58128.   1
  -6  -4   0 622517. 111564.   1
  -6  -4   0 557276. 117696.   1
   6   4   0 510364. 107746.   1
   6   4   0 409557.  55335.   1
   6   4   0 719397. 240672.   1
   6   4   0 552476.  99062.   1
  -6   4   0 824786. 276020.   1
  -6   4   0 519965. 109841.   1
  -6   4   0 491381.  88239.   1
  -6   4   0 456687.  61706.   1
   6  -4   1 236962.  32010.   1
  -6  -4  -1 271656.  36679.   1
  -6  -4  -1 261182.  46847.   1
  -6  -4  -1 320314.  67663.   1
   6   4   1 246563.  33319.   1
   6   4   1 287802.  51604.   1
   6   4   1 292385.  61728.   1
  -6   4  -1 240235.  32468.   1
  -6  -4  -2  21695. 3931.92   1
  -6  -4  -2  21449. 2945.67   1
  -6  -4  -2  23434. 4979.27   1
   6   4   2  23980. 3272.96   1
   6   4   2  25616. 5437.48   1
   6   4   2  21268. 3862.10   1
   6  -4   3 5871.69 1236.96   1
  -6  -4  -3  868.21 3004.58   1
  -6  -4  -3 4514.51 936.722   1
   6   4   3 5845.51 1009.38   1
   6   4   3 5175.64 1069.60   1
  -6   4  -3 2838.75 4178.48   1
  -6  -4  -4  72245.  24198.   1
  -6  -4  -4 -3283.9 5550.94   1
   6   4   4  62208.  20840.   1
  -6   4  -4  11076. 7409.99   1
  -6  -4  -7  -86.60 896.137   1
   6   4   7  913.81 1179.14   1
  -6  -4  -8  849.22 1053.46   1
   6   4   8  445.34 1864.72   1
  -6  -4  -9 -461.49 1046.69   1
   6   4   9 1200.96 1823.04   1
  -6  -4 -10 -114.12 1233.03  -1
   6   4  10  507.31 2023.56  -1
  -6  -4 -11 -1610.7 992.580   1
  -6  -6  13 1586.08 693.868   1
   6   6 -13 1688.19 933.885   1
  -6  -6  12  -24.00 570.805   1
   6   6 -12  -75.41 859.916   1
  -6  -6  11  637.35 535.238   1
   6   6 -11 1848.57 908.356   1
  -6  -6  10  738.16 535.238   1
   6   6 -10  115.34 593.715   1
  -6  -6   9  949.38 587.824   1
   6   6  -9 1516.25 611.171   1
  -6  -6   8 1179.79 514.946  -1
   6   6  -8 1506.87 554.003  -1
  -6  -6   7  26184. 5559.67   1
   6   6  -7  22103. 4697.79   1
  -6  -6   6  17113. 3368.97  -1
  -6  -6   6  40759.  13773.  -1
  -6  -6   6  36134. 7656.55  -1
  -6  -6   6  20844. 2980.58  -1
   6   6  -6  42134.  14200.  -1
   6   6  -6  19293. 2803.84  -1
   6   6  -6  26315. 5579.31  -1
   6   6  -6  23653. 4516.69  -1
   6  -6  -5 1862.53 817.150   1
  -6  -6   5 1602.01 478.289   1
  -6  -6   5   72.14 581.496   1
  -6  -6   5 2788.56 1650.01   1
  -6  -6   5  461.92 929.739   1
   6   6  -5 1986.69 1238.49   1
   6   6  -5  972.72 596.552   1
   6   6  -5  770.46 349.989   1
   6   6  -5  798.60 892.646   1
   6  -6  -4 1428.76 529.347  -1
  -6  -6   4  509.05 391.010  -1
  -6  -6   4 4747.98 2190.70  -1
  -6  -6   4  655.03 770.455  -1
   6   6  -4 1000.22 1025.09  -1
   6   6  -4  146.87 636.046  -1
   6   6  -4  693.21 420.903  -1
  -6   6   4  701.50 454.724  -1
   6  -6  -3 2718.74 475.234   1
  -6  -6   3 1864.72 392.974   1
  -6  -6   3  706.52 545.494   1
   6   6  -3 1490.07 330.351   1
   6   6  -3 1779.84 656.120   1
  -6   6   3 1295.00 329.260   1
  -6  -6   2  25900. 3523.89   1
  -6  -6   2  15313. 5236.74   1
  -6  -6   2  24176. 4396.68   1
   6   6  -2  13397. 4562.51   1
   6   6  -2  18636. 3406.06   1
   6   6  -2  18206. 2487.45   1
  -6   6   2  11355. 3835.91   1
  -6   6   2  17609. 2397.99   1
   6  -6  -1 1433.12 550.294   1
   6  -6  -1  609.43 190.814   1
  -6  -6   1 3257.69 1316.82   1
  -6  -6   1 1952.87 527.165   1
  -6  -6   1  576.91 228.235   1
  -6  -6   1 1602.88 489.417   1
   6   6  -1 3558.80 1375.08   1
   6   6  -1 3133.32 735.107   1
   6   6  -1 2006.98 554.003   1
  -6   6   1 1714.60 666.811   1
  -6   6   1 1571.46 435.304   1
   6  -6   0  23827. 4283.22   1
   6  -6   0  25398. 3447.52   1
   6  -6   0  35501.  11885.   1
   6  -6   0  34606. 7327.07   1
  -6  -6   0  35326. 7477.63   1
  -6  -6   0  34257.  11497.   1
  -6  -6   0  18752. 3406.06   1
   6   6   0  26860. 9015.92   1
   6   6   0  26271. 5568.40   1
   6   6   0  24591. 4449.05   1
   6   6   0  34999. 4747.98   1
  -6   6   0  37923.  12699.   1
  -6   6   0  25355. 4555.96   1
  -6   6   0  34170. 4630.15   1
   6  -6   1  25616. 3482.43  -1
   6  -6   1  27056. 9085.74  -1
  -6  -6  -1  25987. 3528.25  -1
  -6  -6  -1  27209. 9138.11  -1
  -6  -6  -1  25267. 5361.11  -1
  -6  -6  -1  27951. 5046.91  -1
   6   6   1  24525. 8239.14  -1
   6   6   1  22300. 4036.65  -1
   6   6   1  25442. 5400.39  -1
   6   6   1  22583. 3070.04  -1
  -6   6  -1  33690.  11303.  -1
  -6   6  -1  24154. 3283.87  -1
   6  -6   2  12082. 1720.49   1
  -6  -6  -2  14041. 1939.78   1
  -6  -6  -2 6465.19 2267.07   1
  -6  -6  -2  13450. 2882.39   1
  -6  -6  -2  11041. 2048.00   1
   6   6   2 9343.22 3200.96   1
   6   6   2  11519. 1592.19   1
   6   6   2  14346. 2629.28   1
   6   6   2  12795. 2751.47   1
  -6   6  -2 8472.61 2166.05   1
   6  -6   3 3757.36 1317.91   1
  -6  -6  -3  10345. 3552.25   1
  -6  -6  -3 4027.93 868.644   1
  -6  -6  -3 2216.89 642.373   1
  -6  -6  -3 -1132.0 2603.10   1
   6   6   3  12686. 4305.04   1
   6   6   3 4837.44 785.511   1
   6   6   3  766.75 550.294   1
   6   6   3 4305.04 889.155   1
  -6  -6  -4  64957.  21761.   1
  -6  -6  -4  39756. 7180.88   1
   6   6   4  61684.  20672.   1
   6   6   4  51102. 9203.57   1
  -6  -6  -5 -2065.7 6729.21  -1
  -6  -6  -5 1022.91 900.283  -1
  -6  -6  -5 3464.98 905.083  -1
   6   6   5 1303.51 812.349  -1
   6   6   5 5441.84 1207.07  -1
   6   6   5 6753.21 1418.07  -1
  -6  -6  -6  11111. 2162.55   1
   6   6   6  16256. 3124.59   1
  -6  -6  -7 5177.83 1876.93   1
  -6  -6  -7 4665.06 1113.03   1
   6   6   7 7409.99 2592.19   1
   6   6   7 2834.39 1208.16   1
  -6  -6  -8 -128.10 792.930   1
   6   6   8  814.97 1700.63   1
  -6  -6  -9 -585.42 895.264   1
   6   6   9  433.99 1644.34   1
  -6  -6 -10 2048.66 1155.79   1
   6   6  10  808.64 1669.87   1
  -6  -6 -11 1119.57 935.194  -1
   6   6  11 2485.27 1518.22  -1
  -6  -6 -12  168.73 950.905   1
   6   6  12 -1855.6 1619.03   1
  -6  -6 -13 -220.38 898.101   1
   6   6  13 -2219.1 1392.97   1
  -6  -8  15 1036.22 608.335   1
   6   8 -15 -149.64 833.078   1
  -6  -8  14 -473.92 502.727   1
   6   8 -14  931.27 967.269   1
  -6  -8  13  619.90 586.733   1
   6   8 -13 -914.03 1034.69   1
  -6  -8  12  552.91 492.472   1
   6   8 -12 1173.25 833.078   1
  -6  -8  11 1245.03 614.226   1
   6   8 -11    7.10 719.615   1
  -6  -8  10  339.30 489.417   1
   6   8 -10 -483.96 622.954   1
  -6  -8   9  227.36 1399.74   1
  -6  -8   9  556.40 538.730   1
   6   8  -9  817.15 2443.81   1
   6   8  -9  724.63 614.662   1
  -6  -8   8 1962.25 1893.74   1
  -6  -8   8 3133.32 806.676   1
   6   8  -8  144.56 2902.03   1
   6   8  -8 3790.09 939.995   1
  -6  -8   7 2197.25 1308.97   1
  -6  -8   7  552.26 1561.86   1
  -6  -8   7 4885.44 1113.90   1
   6   8  -7  702.38 1340.39   1
   6   8  -7 3076.58 778.965   1
   6   8  -7 6382.28 2019.64   1
  -6  -8   6  15248. 2952.21  -1
   6   8  -6  13092. 2696.92  -1
  -6  -8   5 6969.23 2919.48  -1
  -6  -8   5 6665.93 1159.94  -1
  -6  -8   5 8950.46 1879.55  -1
  -6  -8   5 6661.57 1452.54  -1
   6   8  -5 7082.69 2762.38  -1
   6   8  -5 7914.02 1273.84  -1
   6   8  -5 6351.73 1395.37  -1
   6   8  -5 9954.17 2119.13  -1
   6  -8  -4  10471. 2225.61  -1
   6  -8  -4  12697. 1850.10  -1
   6  -8  -4 5786.60 2022.69  -1
  -6  -8   4 9650.87 2069.38  -1
  -6  -8   4  15922. 2225.61  -1
  -6  -8   4  13770. 2675.10  -1
  -6  -8   4 3940.65 1877.59  -1
   6   8  -4  13581. 1914.46  -1
   6   8  -4  10247. 2210.34  -1
   6   8  -4  12922. 2552.91  -1
  -6   8   4 5548.76 2004.58  -1
  -6   8   4  10085. 2467.81  -1
  -6   8   4  13227. 1905.08  -1
   6  -8  -3 1672.92 741.217   1
   6  -8  -3  270.56 288.239   1
   6  -8  -3  117.13 655.029   1
  -6  -8   3  282.57 300.240   1
  -6  -8   3  174.06 287.366   1
  -6  -8   3 -101.24 528.256   1
  -6  -8   3 1934.10 1223.00   1
   6   8  -3  149.27 866.462   1
   6   8  -3  -92.54 254.636   1
   6   8  -3 -270.13 563.386   1
   6   8  -3  -67.55 405.629   1
  -6   8   3 1138.55 698.014   1
  -6   8   3  423.30 260.310   1
  -6   8   3 -707.61 870.171   1
   6  -8  -2  18804. 6310.27   1
   6  -8  -2 5601.13 1085.10   1
  -6  -8   2  20022. 6785.94   1
  -6  -8   2  11724. 1615.97   1
  -6  -8   2 8199.86 1777.87   1
  -6  -8   2 9596.32 1861.44   1
   6   8  -2  16090. 5468.03   1
   6   8  -2 9207.93 1282.13   1
   6   8  -2 8917.73 1721.14   1
   6   8  -2  13888. 2978.40   1
  -6   8   2  21015. 7060.87   1
  -6   8   2 7996.94 1104.30   1
  -6   8   2 7322.71 1403.23   1
   6  -8  -1 9801.43 1347.37  -1
   6  -8  -1  15675. 5258.56  -1
   6  -8  -1  13537. 2454.72  -1
  -6  -8   1  11464. 1588.04  -1
  -6  -8   1  12481. 2668.55  -1
  -6  -8   1  15763. 5361.11  -1
  -6  -8   1  11263. 2113.24  -1
   6   8  -1  13818. 2555.09  -1
   6   8  -1  10094. 2170.85  -1
   6   8  -1  23849. 8049.30  -1
   6   8  -1  10332. 1430.72  -1
  -6   8   1  26380. 8847.91  -1
  -6   8   1  11946. 2171.28  -1
  -6   8   1  10524. 1439.89  -1
   6  -8   0  14281. 1946.98   1
   6  -8   0  16175. 3423.52   1
  -6  -8   0  13336. 1829.15   1
   6   8   0  30220.  10172.   1
   6   8   0 9679.24 2093.39   1
   6   8   0  19354. 3512.98   1
  -6   8   0  24896. 8359.14   1
  -6   8   0  15730. 2141.17   1
  -6   8   0  16677. 3004.58   1
  -6   8   0  12834. 2716.56   1
   6  -8   1 2371.81 606.153  -1
   6  -8   1  821.95 242.199  -1
  -6  -8  -1 1247.00 458.215  -1
  -6  -8  -1  878.90 206.131  -1
  -6  -8  -1  913.81 447.523  -1
  -6  -8  -1 1207.72 667.902  -1
   6   8   1  821.51 631.463  -1
   6   8   1 1006.98 216.539  -1
   6   8   1 1708.49 607.462  -1
   6   8   1  637.35 398.210  -1
  -6   8  -1 2544.18 1052.37  -1
  -6   8  -1  808.42 232.817  -1
  -6   8  -1  982.76 485.271  -1
  -6   8  -1 1600.26 319.223  -1
   6  -8   2  21063. 2912.94   1
   6  -8   2  11711. 4036.65   1
   6  -8   2  12950. 2762.38   1
   6  -8   2  19557. 3635.17   1
  -6  -8  -2  26773. 3646.08   1
  -6  -8  -2  23849. 4329.04   1
  -6  -8  -2  11660. 2515.82   1
  -6  -8  -2  19404. 6545.92   1
   6   8   2  11765. 3995.20   1
   6   8   2  21172. 2886.75   1
   6   8   2  18174. 3897.01   1
   6   8   2  17417. 3183.50   1
  -6   8  -2  14447. 4942.17   1
  -6   8  -2  35064. 5199.65   1
  -6   8  -2  17853. 3787.91   1
   6  -8   3  11381. 3958.10   1
   6  -8   3 6622.29 1347.37   1
  -6  -8  -3 8158.40 1400.17   1
  -6  -8  -3 9114.11 3118.04   1
  -6  -8  -3 9055.19 1976.21   1
  -6  -8  -3 7743.83 1506.00   1
   6   8   3 5603.31 1165.61   1
   6   8   3  12509. 4254.85   1
   6   8   3  11021. 2432.90   1
   6   8   3 7340.16 1055.42   1
  -6   8  -3  11447. 4006.11   1
  -6   8  -3 8487.88 3543.53   1
  -6  -8  -4  31813.  10681.   1
  -6  -8  -4  20921. 3831.55   1
   6   8   4  27733. 9323.58   1
   6   8   4  19214. 3530.44   1
  -6  -8  -5  40345.  13533.   1
  -6  -8  -5  56317.  10140.   1
   6   8   5  34868.  11711.   1
   6   8   5  52607. 9487.23   1
  -6  -8  -6 -3321.0 6238.27   1
  -6  -8  -6  336.90 620.772   1
  -6  -8  -6  557.28 528.692   1
   6   8   6  736.20 650.228   1
   6   8   6  468.69 678.812   1
   6   8   6  765.00 585.642   1
  -6  -8  -7 1956.79 982.980   1
  -6  -8  -7 1986.69 774.165   1
   6   8   7 1696.05 906.392   1
   6   8   7  629.06 1010.47   1
  -6  -8  -8  154.40 688.195   1
  -6  -8  -8  159.22 663.102   1
   6   8   8  496.18 648.483   1
   6   8   8  591.10 1090.33   1
  -6  -8  -9 1194.41 755.836   1
  -6  -8  -9 1670.08 767.401   1
   6   8   9 -938.03 1200.96   1
  -6  -8 -10 -212.22 737.944   1
   6   8  10  574.73 1270.35   1
  -6  -8 -11 -696.92 789.220   1
   6   8  11 1026.62 1296.31   1
  -6  -8 -12  452.76 837.660   1
   6   8  12 1084.22 1400.17   1
  -6  -8 -13 -818.68 867.335   1
   6   8  13  -42.92 1342.13   1
  -6 -10  14  135.81 556.185   1
   6  10 -14 -247.00 948.941   1
  -6 -10  13  382.94 555.094   1
   6  10 -13 -773.51 955.923   1
  -6 -10  12  984.73 645.428  -1
   6  10 -12 1903.34 1005.02  -1
  -6 -10  11  808.42 559.895   1
   6  10 -11 3181.32 1024.00   1
  -6 -10  10 -171.39 1006.54   1
  -6 -10  10  921.88 550.949   1
   6  10 -10 1138.77 1126.55   1
   6  10 -10  858.61 790.966   1
  -6 -10   9  313.77 1229.54   1
  -6 -10   9 -967.49 1236.53   1
  -6 -10   9  273.40 479.816   1
   6  10  -9 -465.85 1006.11   1
   6  10  -9 -451.23 595.243   1
   6  10  -9 -1851.2 1627.75   1
  -6 -10   8   62.49 1296.97   1
  -6 -10   8  283.22 1410.43   1
  -6 -10   8  819.77 507.091   1
   6  10  -8  905.52 1197.69   1
   6  10  -8  302.64 506.436   1
   6  10  -8  225.62 1548.33   1
   6 -10  -7 7580.18 1853.81   1
  -6 -10   7 4861.44 1423.96   1
  -6 -10   7 2923.85 2044.51   1
  -6 -10   7 5031.63 1149.25   1
   6  10  -7 5027.27 2258.34   1
   6  10  -7 6255.72 1405.41   1
   6  10  -7 4110.84 1499.89   1
   6 -10  -6 8114.76 1911.41   1
  -6 -10   6 5858.60 1301.77   1
  -6 -10   6 8959.19 3519.53   1
  -6 -10   6 5993.88 1461.92   1
  -6 -10   6 7905.29 1712.41   1
   6  10  -6 7451.44 1741.87   1
   6  10  -6 8260.96 3118.04   1
   6  10  -6 4082.47 1146.19   1
   6  10  -6 7091.42 1566.44   1
  -6  10   6 2947.85 1638.23   1
   6 -10  -5  14925. 5038.18  -1
   6 -10  -5  13716. 2622.73  -1
  -6 -10   5  19184. 2710.01  -1
  -6 -10   5 8361.33 3275.14  -1
  -6 -10   5  14224. 2760.20  -1
  -6 -10   5  15983. 3401.70  -1
   6  10  -5  20674. 4401.04  -1
   6  10  -5  16742. 5780.05  -1
   6  10  -5  19199. 3641.72  -1
   6  10  -5  13613. 1944.79  -1
  -6  10   5  17146. 5795.32  -1
  -6  10   5  15483. 3078.77  -1
   6 -10  -4 2035.56 817.804   1
   6 -10  -4  597.86 639.973   1
   6 -10  -4  120.07 556.404   1
  -6 -10   4  456.47 379.445   1
  -6 -10   4 -456.69 661.357   1
  -6 -10   4 -1252.2 1507.96   1
   6  10  -4 3198.77 1584.99   1
   6  10  -4 -655.68 668.993   1
   6  10  -4  488.33 351.953   1
  -6  10   4 3305.69 1238.27   1
  -6  10   4  761.07 582.587   1
  -6  10   4  342.35 783.765   1
   6 -10  -3 1221.69 478.071  -1
   6 -10  -3  907.92 372.245  -1
   6 -10  -3 1346.28 590.661  -1
  -6 -10   3 3013.31 1667.68  -1
  -6 -10   3  610.52 336.679  -1
  -6 -10   3 1677.28 668.557  -1
  -6 -10   3 1746.02 494.654  -1
   6  10  -3  976.87 493.999  -1
   6  10  -3 1035.35 1218.63  -1
   6  10  -3 2227.80 734.889  -1
   6  10  -3 1167.14 308.531  -1
  -6  10   3 2576.91 1056.73  -1
  -6  10   3 1354.35 530.656  -1
  -6  10   3 1052.37 320.532  -1
   6 -10  -2 1674.01 439.232   1
   6 -10  -2 2164.52 822.168   1
  -6 -10   2 2000.00 1189.61   1
  -6 -10   2 1064.37 487.890   1
  -6 -10   2  702.16 396.465   1
   6  10  -2 1825.66 1135.06   1
   6  10  -2  811.26 228.235   1
   6  10  -2  723.76 467.161   1
   6  10  -2  988.87 484.180   1
  -6  10   2 1633.43 801.657   1
  -6  10   2  672.70 189.264   1
  -6  10   2 1005.45 377.482   1
   6 -10  -1  14632. 4918.17   1
   6 -10  -1  17342. 3135.50   1
   6 -10  -1  11547. 2459.09   1
   6 -10  -1  17903. 2435.08   1
  -6 -10   1  16779. 3074.40   1
  -6 -10   1  11405. 2450.36   1
  -6 -10   1  16980. 2325.98   1
  -6 -10   1  14977. 5112.37   1
   6  10  -1 8223.86 2875.84   1
   6  10  -1  18593. 2537.64   1
   6  10  -1  16125. 2958.76   1
   6  10  -1  14272. 3054.76   1
  -6  10   1  13367. 4525.42   1
  -6  10   1  13467. 2873.66   1
  -6  10   1  14521. 2633.64   1
  -6  10   1  16960. 2306.35   1
   6 -10   0 5533.49 1029.67   1
   6 -10   0 3074.40 1113.68   1
  -6 -10   0 6329.91 1210.78   1
  -6 -10   0 4043.20 950.250   1
  -6 -10   0 4237.39 1570.80   1
   6  10   0 5060.00 721.797   1
   6  10   0 6504.47 2323.80   1
   6  10   0 5529.12 1243.51   1
   6  10   0 5243.29 1032.73   1
  -6  10   0 4887.62 1746.67   1
  -6  10   0 4564.69 989.307   1
  -6  10   0 4209.03 798.385   1
  -6  10   0 3763.91 540.039   1
   6 -10   1  17624. 5958.97   1
   6 -10   1  20757. 3755.18   1
   6 -10   1  16515. 2262.71   1
   6 -10   1  20456. 4326.86   1
  -6 -10  -1  18621. 2535.45   1
  -6 -10  -1  17683. 3222.78   1
  -6 -10  -1  17002. 3630.81   1
  -6 -10  -1  14386. 4867.99   1
   6  10   1  14314. 4863.62   1
   6  10   1  16321. 2225.61   1
   6  10   1  15627. 2858.39   1
   6  10   1  17561. 3763.91   1
  -6  10  -1  14178. 4843.98   1
  -6  10  -1  16038. 3401.70   1
  -6  10  -1  22562. 4082.47   1
  -6  10  -1  17334. 2365.26   1
   6 -10   2 6506.65 2371.81   1
   6 -10   2 5044.73 1096.22   1
   6 -10   2 7139.42 1537.42   1
   6 -10   2 6524.10 1000.00   1
  -6 -10  -2 5341.47 764.128   1
  -6 -10  -2 2249.62 591.752   1
  -6 -10  -2  11102. 2406.72   1
   6  10   2 9901.80 3421.34   1
   6  10   2 5319.65 756.927   1
   6  10   2 5762.60 1389.48   1
   6  10   2 4119.57 875.845   1
  -6  10  -2 5228.01 2013.74   1
  -6  10  -2 7743.83 1657.86   1
  -6  10  -2 3547.89 944.140   1
  -6  10  -2  10574. 1956.58   1
   6 -10   3 9498.14 3379.88   1
   6 -10   3 6445.55 1717.00   1
   6 -10   3  11377. 2430.72   1
  -6 -10  -3 8470.43 1610.73   1
  -6 -10  -3 9805.79 1433.34   1
  -6 -10  -3 9602.87 2096.66   1
  -6 -10  -3  12697. 4313.76   1
   6  10   3 7809.29 1095.13   1
   6  10   3  12721. 4342.13   1
   6  10   3  10434. 1949.59   1
   6  10   3  10548. 2358.71   1
  -6  10  -3 5084.00 1737.72   1
  -6  10  -3 9332.31 3368.97   1
  -6  10  -3  10009. 2363.08   1
  -6  10  -3  10580. 2267.07   1
   6 -10   4  13286. 4601.78   1
   6 -10   4  15219. 3251.14   1
  -6 -10  -4  14576. 2672.92   1
  -6 -10  -4  17537. 5913.15   1
  -6 -10  -4  15643. 3358.06   1
   6  10   4  16262. 5502.94   1
   6  10   4  14305. 3196.59   1
   6  10   4  16500. 3019.85   1
  -6  10  -4  11453. 4027.93   1
  -6  10  -4  14490. 3111.50   1
   6 -10   5  16969. 3637.35   1
  -6 -10  -5  18619. 3406.06   1
  -6 -10  -5  13803. 4669.43   1
   6  10   5  17321. 3185.68   1
   6  10   5  12778. 4346.49   1
  -6  10  -5  13882. 3013.31   1
  -6 -10  -6 2950.03 3336.24   1
  -6 -10  -6  813.22 605.716   1
  -6 -10  -6  548.33 526.729   1
   6  10   6  459.31 630.591   1
   6  10   6  348.46 581.278   1
   6  10   6   92.54 421.994   1
  -6 -10  -7  913.81 643.246   1
  -6 -10  -7 -263.36 544.839   1
   6  10   7  238.49 579.314   1
   6  10   7 -207.55 620.772   1
  -6 -10  -8  633.43 563.386   1
  -6 -10  -8 2024.87 768.273   1
   6  10   8  272.75 552.476   1
   6  10   8  685.14 881.954   1
  -6 -10  -9  394.28 637.791   1
  -6 -10  -9 -377.92 765.000   1
   6  10   9  755.84 694.086   1
   6  10   9  922.54 1088.37   1
  -6 -10 -10 2531.09 1076.59   1
  -6 -10 -10  650.88 775.474   1
   6  10  10 1498.80 792.275   1
   6  10  10 -846.82 1245.47   1
  -6 -10 -11  666.81 708.705   1
   6  10  11  104.97 1312.46   1
  -6 -10 -12  443.60 713.287   1
   6  10  12  793.58 1194.63   1
[truncated: 1,445,461 more chars]
