# Supplementary material for: Prospecting for natural products by genome mining and microcrystal electron diffraction
Source: Springer Nature journal article supplement (doi:10.1038/s41589-021-00834-2), 2021-07-26
Supplement: 41589_2021_834_MOESM15_ESM.mol [file 41589_2021_834_MOESM15_ESM.mol]

nchembio.A210312846A-comp7.mol
  ChemDraw06112114042D

 35 39  0  0  1  0  0  0  0  0999 V2000
   -3.5728    1.2380    0.0000 C   0  0  0  0  0  0  0  0  0  0  0  0
   -3.5728    0.4130    0.0000 C   0  0  0  0  0  0  0  0  0  0  0  0
   -2.8583    0.0004    0.0000 C   0  0  0  0  0  0  0  0  0  0  0  0
   -2.1439    0.4130    0.0000 C   0  0  0  0  0  0  0  0  0  0  0  0
   -2.1439    1.2380    0.0000 C   0  0  0  0  0  0  0  0  0  0  0  0
   -2.8583    1.6496    0.0000 C   0  0  0  0  0  0  0  0  0  0  0  0
   -1.4294    0.0004    0.0000 C   0  0  0  0  0  0  0  0  0  0  0  0
   -4.2864    1.6496    0.0000 O   0  0  0  0  0  0  0  0  0  0  0  0
   -1.4294   -0.8246    0.0000 C   0  0  0  0  0  0  0  0  0  0  0  0
   -0.7149   -1.2371    0.0000 N   0  0  0  0  0  0  0  0  0  0  0  0
   -0.0004   -0.8246    0.0000 C   0  0  0  0  0  0  0  0  0  0  0  0
   -0.0004    0.0004    0.0000 C   0  0  0  0  0  0  0  0  0  0  0  0
   -0.7149    0.4130    0.0000 C   0  0  0  0  0  0  0  0  0  0  0  0
   -0.7149    1.2380    0.0000 O   0  0  0  0  0  0  0  0  0  0  0  0
    0.7140    0.4130    0.0000 C   0  0  0  0  0  0  0  0  0  0  0  0
    1.4285    0.0004    0.0000 C   0  0  0  0  0  0  0  0  0  0  0  0
    0.7140    1.2380    0.0000 O   0  0  0  0  0  0  0  0  0  0  0  0
    0.7140   -1.2371    0.0000 O   0  0  0  0  0  0  0  0  0  0  0  0
    1.4285   -0.8246    0.0000 C   0  0  0  0  0  0  0  0  0  0  0  0
    2.1430   -1.2371    0.0000 C   0  0  0  0  0  0  0  0  0  0  0  0
    2.8574   -0.8246    0.0000 C   0  0  0  0  0  0  0  0  0  0  0  0
    2.8574    0.0004    0.0000 C   0  0  0  0  0  0  0  0  0  0  0  0
    2.1430    0.4130    0.0000 C   0  0  0  0  0  0  0  0  0  0  0  0
    0.7140   -0.4121    0.0000 H   0  0  0  0  0  0  0  0  0  0  0  0
   -2.1439    2.0621    0.0000 O   0  0  0  0  0  0  0  0  0  0  0  0
   -2.1439   -0.4121    0.0000 O   0  0  0  0  0  0  0  0  0  0  0  0
    3.5719    0.4130    0.0000 C   0  0  0  0  0  0  0  0  0  0  0  0
    3.5719    1.2380    0.0000 C   0  0  0  0  0  0  0  0  0  0  0  0
    2.8574    1.6496    0.0000 C   0  0  0  0  0  0  0  0  0  0  0  0
    2.1430    1.2380    0.0000 C   0  0  0  0  0  0  0  0  0  0  0  0
    1.4285    0.8255    0.0000 H   0  0  0  0  0  0  0  0  0  0  0  0
    3.5719   -0.4121    0.0000 H   0  0  0  0  0  0  0  0  0  0  0  0
    1.0160   -1.5390    0.0000 C   0  0  0  0  0  0  0  0  0  0  0  0
   -0.7149   -2.0621    0.0000 O   0  0  0  0  0  0  0  0  0  0  0  0
    4.2864    1.6496    0.0000 C   0  0  0  0  0  0  0  0  0  0  0  0
  1  2  1  0      
  2  3  1  0      
  3  4  1  0      
  4  5  1  0      
  5  6  1  0      
  6  1  1  0      
  4  7  1  0      
  1  8  1  1      
  7  9  2  0      
  9 10  1  0      
 10 11  1  0      
 11 12  1  0      
 12 13  2  0      
 13  7  1  0      
 13 14  1  0      
 12 15  1  0      
 15 16  1  0      
 15 17  2  0      
 11 18  2  0      
 16 19  1  0      
 19 20  1  0      
 20 21  2  0      
 21 22  1  0      
 22 23  1  0      
 23 16  1  0      
 16 24  1  6      
  5 25  1  1      
  6 25  1  1      
  4 26  1  6      
 22 27  1  0      
 27 28  1  0      
 28 29  1  0      
 29 30  1  0      
 30 23  1  0      
 23 31  1  1      
 22 32  1  6      
 19 33  1  1      
 10 34  1  0      
 28 35  1  1      
M  END
