# Supplementary material for: Prospecting for natural products by genome mining and microcrystal electron diffraction
Source: Springer Nature journal article supplement (doi:10.1038/s41589-021-00834-2), 2021-07-26
Supplement: 41589_2021_834_MOESM18_ESM.mol [file 41589_2021_834_MOESM18_ESM.mol]

nchembio.A210312846A-comp8.mol
  ChemDraw06112114042D

 33 37  0  0  1  0  0  0  0  0999 V2000
   -2.4962   -0.6740    0.0000 C   0  0  0  0  0  0  0  0  0  0  0  0
   -2.4962   -1.4990    0.0000 C   0  0  0  0  0  0  0  0  0  0  0  0
   -1.7817   -1.9115    0.0000 O   0  0  0  0  0  0  0  0  0  0  0  0
   -1.0673   -1.4990    0.0000 C   0  0  0  0  0  0  0  0  0  0  0  0
   -1.0673   -0.6740    0.0000 C   0  0  0  0  0  0  0  0  0  0  0  0
   -1.7817   -0.2615    0.0000 C   0  0  0  0  0  0  0  0  0  0  0  0
   -0.3528   -1.0865    0.0000 C   0  0  0  0  0  0  0  0  0  0  0  0
    0.3617   -0.6740    0.0000 C   0  0  0  0  0  0  0  0  0  0  0  0
    0.3617    0.1510    0.0000 C   0  0  0  0  0  0  0  0  0  0  0  0
   -0.3528    0.5635    0.0000 C   0  0  0  0  0  0  0  0  0  0  0  0
   -1.0673    0.1510    0.0000 C   0  0  0  0  0  0  0  0  0  0  0  0
    1.0761    0.5635    0.0000 C   0  0  0  0  0  0  0  0  0  0  0  0
    1.0761    1.3885    0.0000 C   0  0  0  0  0  0  0  0  0  0  0  0
    0.3617    1.8010    0.0000 C   0  0  0  0  0  0  0  0  0  0  0  0
   -0.3528    1.3885    0.0000 C   0  0  0  0  0  0  0  0  0  0  0  0
   -3.2107   -1.9115    0.0000 O   0  0  0  0  0  0  0  0  0  0  0  0
   -0.6548   -2.2135    0.0000 C   0  0  0  0  0  0  0  0  0  0  0  0
   -0.2704   -1.7125    0.0000 C   0  0  0  0  0  0  0  0  0  0  0  0
   -1.7817    0.5635    0.0000 C   0  0  0  0  0  0  0  0  0  0  0  0
   -1.0673    1.8010    0.0000 O   0  0  0  0  0  0  0  0  0  0  0  0
    1.0761    2.2135    0.0000 O   0  0  0  0  0  0  0  0  0  0  0  0
    1.6499    1.6955    0.0000 C   0  0  0  0  0  0  0  0  0  0  0  0
    1.7906    0.9760    0.0000 C   0  0  0  0  0  0  0  0  0  0  0  0
    1.2477   -0.2435    0.0000 C   0  0  0  0  0  0  0  0  0  0  0  0
    2.0682   -0.3297    0.0000 O   0  0  0  0  0  0  0  0  0  0  0  0
    2.4037    0.4240    0.0000 C   0  0  0  0  0  0  0  0  0  0  0  0
    1.7906    1.8010    0.0000 C   0  0  0  0  0  0  0  0  0  0  0  0
    2.5051    2.2135    0.0000 O   0  0  0  0  0  0  0  0  0  0  0  0
    0.6956   -0.8566    0.0000 O   0  0  0  0  0  0  0  0  0  0  0  0
    3.2107    0.5955    0.0000 C   0  0  0  0  0  0  0  0  0  0  0  0
    2.5443    1.3115    0.0000 O   0  0  0  0  0  0  0  0  0  0  0  0
   -0.3528    2.2135    0.0000 C   0  0  0  0  0  0  0  0  0  0  0  0
    0.3617    0.9760    0.0000 C   0  0  0  0  0  0  0  0  0  0  0  0
  1  2  1  0      
  2  3  1  0      
  3  4  1  0      
  5  4  1  6      
  5  6  1  1      
  6  1  2  0      
  5  7  1  0      
  7  8  1  0      
  8  9  1  0      
  9 10  1  0      
 10 11  2  0      
 11  5  1  0      
  9 12  1  0      
 12 13  1  0      
 13 14  1  0      
 14 15  1  0      
 15 10  1  0      
  2 16  2  0      
  4 17  1  1      
  4 18  1  6      
 11 19  1  0      
 15 20  1  6      
 14 21  1  0      
 13 22  2  0      
 12 23  1  0      
 12 24  1  6      
 24 25  1  0      
 25 26  1  0      
 26 23  1  0      
 21 27  1  0      
 27 23  1  0      
 27 28  2  0      
 24 29  2  0      
 26 30  1  1      
 23 31  1  1      
 14 32  1  6      
  9 33  1  6      
M  END
