# Supplementary material for: Prospecting for natural products by genome mining and microcrystal electron diffraction
Source: Springer Nature journal article supplement (doi:10.1038/s41589-021-00834-2), 2021-07-26
Supplement: MOESM22 [file 41589_2021_834_MOESM22_ESM.cif]

data_a

_audit_update_record
;
2021-03-08 # Formatted by publCIF

;

# publcif _publ_body_element loop start
loop_
_publ_body_element
_publ_body_title
_publ_body_contents

 section 
;
Introduction
; 
;

;
 section 
;
Experimental
; 
;

;
 subsection 
;
Synthesis and crystallization
; 
;

;
 subsection 
;
Refinement
;
;
Crystal data, data collection and structure refinement details are summarized
in Table 1.
;

 section 
;
Results and discussion
; 
;

;
# publcif _publ_body_element loop end

# start Validation Reply Form
_vrf_THETM01_a
;
PROBLEM: The value of sine(theta_max)/wavelength is less than 0.575
RESPONSE: Data was truncated to a resolution of 0.9 angstrom, 
due to higher resolution data falling outside of the edge of 
the detector.
;
_vrf_PLAT029_a
;
PROBLEM: _diffrn_measured_fraction_theta_full value Low .      0.846 Why?  
RESPONSE: Full sampling of reciprocal space was hindered by the 
limited stage tilt of the electron microscope.
;
_vrf_PLAT417_a
;
PROBLEM: Short Inter D-H..H-D       H1       ..H1       .       1.62 Ang.  
RESPONSE: Diffraction data from four crystals were merged to 
obtain a desirable completeness, resulting in some structural 
disordering. In addition, these hydrogens were placed using the 
riding model.
;
_vrf_PLAT306_a
;
PROBLEM: Isolated Oxygen Atom (H-atoms Missing ?) .......        O1A Check 
RESPONSE: Diffraction data from four crystals were merged to 
obtain a desirable completeness, and we observed a high level of 
solvent disorder, whose atoms we could not unambiguously identify 
and place. O1A is an oxygen we put in lieu of a solvent molecule.
;
_vrf_PLAT340_a
;
PROBLEM: Low Bond Precision on  C-C Bonds ...............    0.02324 Ang.  
RESPONSE: Diffraction data from four crystals were merged to 
obtain a desirable completeness, resulting in some structural 
disordering.
;
_vrf_RINTA01_a
;
PROBLEM: The value of Rint is greater than 0.12
RESPONSE: Electron diffraction data has higher R-factors compared to X-ray data.
 Four diffraction data sets were merged.
;
_vrf_PLAT020_a
;
PROBLEM: The Value of Rint is Greater Than 0.12 ......... 0.160 Report
RESPONSE: Electron diffraction data has higher R-factors compared to X-ray data.
 Four diffraction data sets were merged.
;
_vrf_PLAT036_a
;
PROBLEM: No s.u. Given for Flack Parameter .............. Please Do !
RESPONSE: No reasonable Flack Parameter could be obtained from electron
 diffraction data.
;
_vrf_PLAT082_a
;
PROBLEM: High R1 Value .................................. 0.14 Report
RESPONSE: Electron diffraction data has higher R-factors compared to X-ray data.
 Four diffraction data sets were merged.
;
_vrf_PLAT084_a
;
PROBLEM: High wR2 Value (i.e. > 0.25) ................... 0.35 Report
RESPONSE: Electron diffraction data has higher R-factors compared to X-ray data.
 Four diffraction data sets were merged.
;
_vrf_PLAT089_a
;
PROBLEM: Poor Data / Parameter Ratio (Zmax < 18) ........ 6.47 Note
RESPONSE: The completeness of the data set is low due to
 limitations in stage rotation in MicroED and preferred orientation of the
 crystals due to their morphology.
;
_vrf_PLAT148_a
;
PROBLEM: s.u. on the a - Axis is (Too) Large .... 0.010 Ang.
RESPONSE: Diffraction data from four crystals were merged to obtain a desirable
 completeness.
;
_vrf_PLAT202_a
;
PROBLEM: Isotropic non-H Atoms in Anion/Solvent ......... 1 Check
RESPONSE: Diffraction data from four crystals were merged to obtain a desirable
 completeness, and we observed a high level of solvent disorder.
;
_vrf_PLAT241_a
;
PROBLEM: High ?MainMol? Ueq as Compared to Neighbors of C29 Check
RESPONSE: Diffraction data from four crystals were merged to obtain a desirable
 completeness.
;
# end Validation Reply Form

_publ_contact_author_name        'Hosea Nelson'
_publ_contact_author_address     
;Department of Chemistry and Biochemistry
University of California, Los Angeles
;
_publ_contact_author_email       hosea@chem.ucla.edu
loop_
_publ_author_name
_publ_author_address
'Nelson, Hosea M.'
;Department of Chemistry and Biochemistry
University of California, Los Angeles
;
'Kim, Lee Joon'
;Department of Chemistry and Biochemistry
University of California, Los Angeles
;
 
_audit_creation_method            'SHELXL-2018/3'
_shelx_SHELXL_version_number      '2018/3'
_chemical_name_systematic         ?
_chemical_name_common             'Py-469'
_chemical_melting_point           ?
_chemical_formula_moiety          '2(C27 H35 N O6), O'
_chemical_formula_sum
 'C54 H70 N2 O13' 
_chemical_formula_weight          955.16

loop_
 _atom_type_symbol
 _atom_type_description
 _atom_type_scat_dispersion_real
 _atom_type_scat_dispersion_imag
 _atom_type_scat_source
 'C'  'C'   0.0000   0.0000
 'International Tables Vol C Tables 4.2.6.8 and 6.1.1.4'
 'N'  'N'   0.0000   0.0000
 'International Tables Vol C Tables 4.2.6.8 and 6.1.1.4'
 'O'  'O'   0.0000   0.0000
 'International Tables Vol C Tables 4.2.6.8 and 6.1.1.4'
 'H'  'H'   0.0000   0.0000
 'International Tables Vol C Tables 4.2.6.8 and 6.1.1.4'
 
_space_group_crystal_system       orthorhombic
_space_group_IT_number            20
_space_group_name_H-M_alt         'C 2 2 21'
_space_group_name_Hall            'C 2c 2'
 
_shelx_space_group_comment
;
The symmetry employed for this shelxl refinement is uniquely defined
by the following loop, which should always be used as a source of
symmetry information in preference to the above space-group names.
They are only intended as comments.
;
 
loop_
 _space_group_symop_operation_xyz
 'x, y, z'
 'x, -y, -z'
 '-x, y, -z+1/2'
 '-x, -y, z+1/2'
 'x+1/2, y+1/2, z'
 'x+1/2, -y+1/2, -z'
 '-x+1/2, y+1/2, -z+1/2'
 '-x+1/2, -y+1/2, z+1/2'
 
_cell_length_a                    5.26(1)
_cell_length_b                    26.64(4)
_cell_length_c                    34.53(9)
_cell_angle_alpha                 90
_cell_angle_beta                  90
_cell_angle_gamma                 90
_cell_volume                      4838.6(11)
_cell_formula_units_Z             4
_cell_measurement_temperature     293(2)
_cell_measurement_reflns_used     3001
_cell_measurement_theta_min       0.054
_cell_measurement_theta_max       0.799
 
_exptl_crystal_description        'nano crystals'
_exptl_crystal_colour             'white'
_exptl_crystal_density_meas       ?
_exptl_crystal_density_method     ?
_exptl_crystal_density_diffrn     1.311          
_exptl_crystal_F_000              811
_exptl_transmission_factor_min    ?
_exptl_transmission_factor_max    ?
_exptl_crystal_size_max           0.001
_exptl_crystal_size_mid           0.0007
_exptl_crystal_size_min           0.0005
_exptl_absorpt_coefficient_mu     0.000
_shelx_estimated_absorpt_T_min    ?
_shelx_estimated_absorpt_T_max    ?
_exptl_absorpt_correction_type    ?
_exptl_absorpt_correction_T_min   ?
_exptl_absorpt_correction_T_max   ?
_exptl_absorpt_process_details    ?
_exptl_absorpt_special_details    ?
_diffrn_ambient_temperature       293(2)
_diffrn_radiation_wavelength      0.0251
_diffrn_radiation_type            '200 keV electrons'
_diffrn_source                    'electron microscope FEG'
_diffrn_measurement_device_type   'Talos F200C'
_diffrn_measurement_method        'continuous rotation'
_diffrn_detector_area_resol_mean  32
_diffrn_reflns_number             12969
_diffrn_reflns_av_unetI/netI      0.1508
_diffrn_reflns_av_R_equivalents   0.1599
_diffrn_reflns_limit_h_min        -5
_diffrn_reflns_limit_h_max        5
_diffrn_reflns_limit_k_min        -29
_diffrn_reflns_limit_k_max        29
_diffrn_reflns_limit_l_min        -33
_diffrn_reflns_limit_l_max        32
_diffrn_reflns_theta_min          0.054
_diffrn_reflns_theta_max          0.799
_diffrn_reflns_theta_full         0.799
_diffrn_measured_fraction_theta_max   0.846
_diffrn_measured_fraction_theta_full  0.846
_diffrn_reflns_Laue_measured_fraction_max    0.846
_diffrn_reflns_Laue_measured_fraction_full   0.846
_diffrn_reflns_point_group_measured_fraction_max   0.865
_diffrn_reflns_point_group_measured_fraction_full  0.865
_reflns_number_total              3001
_reflns_number_gt                 2502
_reflns_threshold_expression      'I > 2\s(I)'
_reflns_Friedel_coverage          0.753
_reflns_Friedel_fraction_max      0.891
_reflns_Friedel_fraction_full     0.891
 
_reflns_special_details
;
 Reflections were merged by SHELXL according to the crystal
 class for the calculation of statistics and refinement.
 
 _reflns_Friedel_fraction is defined as the number of unique
 Friedel pairs measured divided by the number that would be
 possible theoretically, ignoring centric projections and
 systematic absences.
;
 
_computing_data_collection        Ceta-D
_computing_cell_refinement        'XSCALE XDS'
_computing_data_reduction         XDSCONV
_computing_structure_solution     'SHELXD 2013/2 (Sheldrick, 2013)'
_computing_structure_refinement 'SHELXL-2018/3 (Sheldrick, 2018)'
_computing_molecular_graphics     ShelxLe
_computing_publication_material   ?
_refine_special_details           ?
_refine_ls_structure_factor_coef  Fsqd
_refine_ls_matrix_type            full
_refine_ls_weighting_scheme       calc
_refine_ls_weighting_details
'w=1/[\s^2^(Fo^2^)+(0.1000P)^2^] where P=(Fo^2^+2Fc^2^)/3'
_atom_sites_solution_primary      direct
_atom_sites_solution_secondary    difmap
_atom_sites_solution_hydrogens    geom
_refine_ls_hydrogen_treatment     constr
_refine_ls_extinction_method      'SHELXL-2018/3 (Sheldrick 2018)'
_refine_ls_extinction_coef        1449(39)
_refine_ls_extinction_expression
 'Fc^*^=kFc[1+0.001xFc^2^\l^3^/sin(2\q)]^-1/4^'
_refine_ls_abs_structure_details
;
 All f" are zero, so absolute structure could not be determined
;
_refine_ls_abs_structure_Flack    0
_chemical_absolute_configuration  syn
_refine_ls_number_reflns          3001
_refine_ls_number_parameters      313
_refine_ls_number_restraints      810
_refine_ls_R_factor_all           0.1570
_refine_ls_R_factor_gt            0.1368
_refine_ls_wR_factor_ref          0.3505
_refine_ls_wR_factor_gt           0.3199
_refine_ls_goodness_of_fit_ref    1.778
_refine_ls_restrained_S_all       1.592
_refine_ls_shift/su_max           0.003
_refine_ls_shift/su_mean          0.000
 
loop_
 _atom_site_label
 _atom_site_type_symbol
 _atom_site_fract_x
 _atom_site_fract_y
 _atom_site_fract_z
 _atom_site_U_iso_or_equiv
 _atom_site_adp_type
 _atom_site_occupancy
 _atom_site_site_symmetry_order  
 _atom_site_calc_flag
 _atom_site_refinement_flags_posn
 _atom_site_refinement_flags_adp
 _atom_site_refinement_flags_occupancy
 _atom_site_disorder_assembly
 _atom_site_disorder_group
O1 O 0.241(3) 0.4216(6) 0.7340(6) 0.075(4) Uani 1 1 d . U . . .
H1 H 0.346193 0.407901 0.748051 0.113 Uiso 1 1 calc R U . . .
O1A O 0.500000 0.273(7) 0.250000 0.45(10) Uiso 1 2 d S . P . .
C2 C 0.211(3) 0.3944(6) 0.7014(7) 0.059(3) Uani 1 1 d . U . . .
H2 H 0.029732 0.386202 0.699053 0.071 Uiso 1 1 calc R U . . .
C3 C 0.355(3) 0.3474(6) 0.6969(6) 0.057(4) Uani 1 1 d . U . . .
H3A H 0.289413 0.322451 0.714827 0.068 Uiso 1 1 calc R U . . .
H3AB H 0.532024 0.353285 0.703167 0.068 Uiso 1 1 calc R U . . .
C4 C 0.334(3) 0.3277(5) 0.6558(6) 0.054(4) Uani 1 1 d . U . . .
H4A H 0.157252 0.328034 0.647716 0.065 Uiso 1 1 calc R U . . .
H4AB H 0.393883 0.293267 0.654842 0.065 Uiso 1 1 calc R U . . .
C5 C 0.492(2) 0.3602(4) 0.6283(5) 0.040(3) Uani 1 1 d . U . . .
C6 C 0.420(3) 0.4131(5) 0.6335(5) 0.045(3) Uani 1 1 d . U . . .
H6 H 0.526311 0.438269 0.620611 0.053 Uiso 1 1 calc R U . . .
C7 C 0.280(3) 0.4291(5) 0.6675(6) 0.058(3) Uani 1 1 d . U . . .
H7 H 0.302248 0.464484 0.674423 0.070 Uiso 1 1 calc R U . . .
O9 O 0.739(2) 0.3544(5) 0.6394(5) 0.060(4) Uani 1 1 d . U . . .
H9 H 0.830558 0.371484 0.625361 0.090 Uiso 1 1 calc R U . . .
O8 O 0.144(2) 0.4203(4) 0.6319(5) 0.052(3) Uani 1 1 d . U . . .
N12 N 0.266(2) 0.2944(4) 0.5391(5) 0.051(3) Uani 1 1 d . U . . .
H12 H 0.143839 0.274471 0.533141 0.061 Uiso 1 1 calc R U . . .
C11 C 0.280(2) 0.3118(4) 0.5754(5) 0.044(3) Uani 1 1 d . U . . .
H11 H 0.159140 0.300569 0.592975 0.053 Uiso 1 1 calc R U . . .
C10 C 0.450(2) 0.3432(4) 0.5879(5) 0.036(2) Uani 1 1 d . U . . .
C13 C 0.435(2) 0.3066(4) 0.5116(5) 0.038(3) Uani 1 1 d . U . . .
C15 C 0.614(2) 0.3615(4) 0.5580(5) 0.037(3) Uani 1 1 d . U . . .
C14 C 0.601(2) 0.3454(4) 0.5214(5) 0.036(3) Uani 1 1 d . U . . .
O16 O 0.430(2) 0.2820(3) 0.4816(5) 0.045(3) Uani 1 1 d . U . . .
C18 C 0.754(3) 0.3716(4) 0.4923(5) 0.043(3) Uani 1 1 d . U . . .
O17 O 0.777(2) 0.3950(4) 0.5689(5) 0.051(4) Uani 1 1 d . U . . .
H17 H 0.861268 0.404042 0.550261 0.077 Uiso 1 1 calc R U . . .
O19 O 0.912(2) 0.4014(5) 0.5034(5) 0.062(4) Uani 1 1 d . U . . .
C21 C 0.913(2) 0.3242(4) 0.4369(5) 0.041(3) Uani 1 1 d . U . . .
H21 H 0.941303 0.296549 0.452773 0.050 Uiso 1 1 calc R U . . .
C20 C 0.731(3) 0.3637(4) 0.4512(6) 0.049(3) Uani 1 1 d . U . . .
H20 H 0.560869 0.349502 0.447361 0.059 Uiso 1 1 calc R U . . .
C24 C 0.761(2) 0.3982(5) 0.3863(5) 0.045(3) Uani 1 1 d . U . . .
H24 H 0.616796 0.376320 0.380061 0.054 Uiso 1 1 calc R U . . .
C23 C 0.997(3) 0.3675(5) 0.3783(6) 0.055(4) Uani 1 1 d D U . . .
H23 H 1.142075 0.390074 0.382168 0.067 Uiso 1 1 calc R U . . .
C22 C 1.035(3) 0.3261(4) 0.4034(6) 0.048(3) Uani 1 1 d . U . . .
C25 C 0.735(2) 0.4106(4) 0.4281(5) 0.042(3) Uani 1 1 d . U . . .
H25 H 0.886263 0.429702 0.435771 0.050 Uiso 1 1 calc R U . . .
C27 C 0.752(3) 0.4294(7) 0.3189(7) 0.075(4) Uani 1 1 d D U . . .
H27 H 0.602266 0.408699 0.313439 0.089 Uiso 1 1 calc R U . . .
C26 C 0.739(4) 0.4412(7) 0.3605(7) 0.072(4) Uani 1 1 d . U . . .
H26A H 0.873161 0.464825 0.366704 0.086 Uiso 1 1 calc R U . . .
H26B H 0.577880 0.457827 0.365671 0.086 Uiso 1 1 calc R U . . .
C28 C 0.979(4) 0.3963(8) 0.3105(8) 0.086(6) Uani 1 1 d . U . . .
H28A H 0.966842 0.383933 0.284149 0.103 Uiso 1 1 calc R U . . .
H28B H 1.132895 0.416386 0.312301 0.103 Uiso 1 1 calc R U . . .
C31 C 0.741(4) 0.4714(9) 0.2913(9) 0.100(7) Uani 1 1 d D U . . .
H31A H 0.572390 0.485191 0.291078 0.150 Uiso 1 1 calc R U . . .
H31B H 0.783806 0.459587 0.265902 0.150 Uiso 1 1 calc R U . . .
H31C H 0.859740 0.496910 0.299042 0.150 Uiso 1 1 calc R U . . .
C32 C 0.515(2) 0.4407(4) 0.4372(6) 0.052(5) Uani 1 1 d . U . . .
H32 H 0.356915 0.425054 0.437360 0.062 Uiso 1 1 calc R U . . .
C33 C 0.524(3) 0.4894(5) 0.4454(7) 0.062(6) Uani 1 1 d . U . . .
H33 H 0.682758 0.504672 0.444744 0.074 Uiso 1 1 calc R U . . .
C34 C 0.302(3) 0.5221(6) 0.4556(8) 0.075(7) Uani 1 1 d . U . . .
H34A H 0.330156 0.536923 0.480613 0.113 Uiso 1 1 calc R U . . .
H34B H 0.150315 0.502203 0.456258 0.113 Uiso 1 1 calc R U . . .
H34C H 0.284872 0.548097 0.436576 0.113 Uiso 1 1 calc R U . . .
C30 C 1.216(3) 0.2872(5) 0.3944(6) 0.060(5) Uani 1 1 d . U . . .
H30A H 1.235306 0.265495 0.416410 0.090 Uiso 1 1 calc R U . . .
H30B H 1.376432 0.302051 0.388062 0.090 Uiso 1 1 calc R U . . .
H30C H 1.155043 0.268032 0.372731 0.090 Uiso 1 1 calc R U . . .
C29 C 1.002(4) 0.3526(8) 0.3374(7) 0.086(5) Uani 1 1 d D U . . .
H29A H 0.862532 0.329580 0.332556 0.103 Uiso 1 1 calc R U . . .
H29B H 1.159256 0.335024 0.332151 0.103 Uiso 1 1 calc R U . . .
 
loop_
 _atom_site_aniso_label
 _atom_site_aniso_U_11
 _atom_site_aniso_U_22
 _atom_site_aniso_U_33
 _atom_site_aniso_U_23
 _atom_site_aniso_U_13
 _atom_site_aniso_U_12
O1 0.051(7) 0.107(9) 0.068(10) -0.021(7) -0.006(9) 0.000(7)
C2 0.034(6) 0.078(7) 0.065(9) -0.013(5) 0.003(7) -0.008(6)
C3 0.047(8) 0.077(7) 0.045(9) 0.020(6) 0.007(7) 0.002(6)
C4 0.053(7) 0.047(6) 0.062(9) 0.000(6) 0.006(7) -0.005(5)
C5 0.036(5) 0.039(5) 0.046(7) 0.009(5) -0.006(5) 0.015(4)
C6 0.044(5) 0.045(5) 0.044(10) -0.011(5) -0.015(6) -0.002(5)
C7 0.062(8) 0.042(6) 0.070(9) -0.012(5) 0.000(6) 0.014(6)
O9 0.032(5) 0.081(7) 0.067(13) -0.002(7) -0.019(6) -0.009(5)
O8 0.046(5) 0.036(5) 0.075(10) 0.002(6) -0.002(6) 0.007(4)
N12 0.028(5) 0.053(6) 0.072(9) -0.014(6) 0.001(6) -0.022(5)
C11 0.032(6) 0.040(6) 0.061(9) 0.002(6) 0.005(6) -0.010(5)
C10 0.025(5) 0.029(5) 0.055(6) -0.005(5) -0.007(4) 0.005(4)
C13 0.020(5) 0.033(5) 0.061(8) -0.013(5) -0.006(5) -0.003(4)
C15 0.037(5) 0.024(5) 0.048(7) -0.006(5) -0.009(5) -0.005(4)
C14 0.040(6) 0.018(4) 0.051(6) -0.002(4) -0.011(5) -0.002(4)
O16 0.036(5) 0.039(5) 0.061(9) -0.018(5) 0.001(6) 0.002(4)
C18 0.041(6) 0.032(5) 0.056(6) 0.001(5) -0.012(6) -0.004(4)
O17 0.042(5) 0.052(5) 0.060(11) -0.006(5) -0.008(6) -0.023(5)
O19 0.055(7) 0.081(7) 0.051(11) 0.009(7) -0.007(7) -0.032(6)
C21 0.032(6) 0.034(5) 0.059(9) -0.001(5) -0.011(6) -0.006(4)
C20 0.047(7) 0.044(5) 0.056(7) 0.006(5) -0.007(6) 0.002(5)
C24 0.020(5) 0.056(6) 0.058(7) -0.007(5) -0.010(6) -0.007(4)
C23 0.045(7) 0.059(7) 0.062(9) 0.004(6) 0.009(7) 0.020(5)
C22 0.046(7) 0.039(5) 0.059(10) -0.006(6) -0.008(6) -0.002(5)
C25 0.034(6) 0.035(5) 0.056(7) -0.004(5) -0.003(6) 0.004(4)
C27 0.045(7) 0.114(11) 0.064(9) 0.012(8) -0.001(9) 0.020(8)
C26 0.060(9) 0.086(9) 0.069(9) 0.009(7) 0.008(9) 0.038(8)
C28 0.095(13) 0.099(11) 0.064(12) 0.006(9) 0.026(11) 0.037(10)
C31 0.065(12) 0.137(15) 0.098(16) 0.045(13) 0.006(13) 0.017(11)
C32 0.034(6) 0.040(5) 0.082(14) 0.013(6) 0.021(7) 0.001(4)
C33 0.041(7) 0.047(5) 0.098(18) 0.004(7) 0.009(8) 0.012(5)
C34 0.065(10) 0.060(8) 0.10(2) 0.013(9) 0.016(11) 0.035(7)
C30 0.066(9) 0.068(8) 0.046(14) 0.002(8) -0.014(8) 0.024(7)
C29 0.074(11) 0.129(12) 0.054(10) 0.017(8) 0.019(10) 0.033(10)
 
_geom_special_details
;
 All esds (except the esd in the dihedral angle between two l.s. planes)
 are estimated using the full covariance matrix.  The cell esds are taken
 into account individually in the estimation of esds in distances, angles
 and torsion angles; correlations between esds in cell parameters are only
 used when they are defined by crystal symmetry.  An approximate (isotropic)
 treatment of cell esds is used for estimating esds involving l.s. planes.
;
 
loop_
 _geom_bond_atom_site_label_1
 _geom_bond_atom_site_label_2
 _geom_bond_distance
 _geom_bond_site_symmetry_2
 _geom_bond_publ_flag
O1 C2 1.35(3) . ?
C2 C3 1.47(2) . ?
C2 C7 1.54(3) . ?
C3 C4 1.52(3) . ?
C4 C5 1.53(2) . ?
C5 O9 1.363(19) . ?
C5 C6 1.470(18) . ?
C5 C10 1.48(2) . ?
C6 C7 1.45(3) . ?
C6 O8 1.468(18) . ?
C7 O8 1.44(2) . ?
N12 C11 1.34(2) . ?
N12 C13 1.34(2) . ?
C11 C10 1.297(19) . ?
C10 C15 1.43(2) . ?
C13 O16 1.22(2) . ?
C13 C14 1.394(17) . ?
C15 O17 1.292(16) . ?
C15 C14 1.34(2) . ?
C14 C18 1.47(2) . ?
C18 O19 1.209(18) . ?
C18 C20 1.44(2) . ?
C21 C22 1.32(2) . ?
C21 C20 1.50(2) . ?
C20 C25 1.48(2) . ?
C24 C26 1.45(3) . ?
C24 C25 1.49(2) . ?
C24 C23 1.512(18) . ?
C23 C22 1.42(2) . ?
C23 C29 1.47(2) . ?
C22 C30 1.44(2) . ?
C25 C32 1.444(18) . ?
C27 C31 1.47(2) . ?
C27 C26 1.47(3) . ?
C27 C28 1.51(3) . ?
C28 C29 1.49(3) . ?
C32 C33 1.33(2) . ?
C33 C34 1.50(2) . ?
 
loop_
 _geom_angle_atom_site_label_1
 _geom_angle_atom_site_label_2
 _geom_angle_atom_site_label_3
 _geom_angle
 _geom_angle_site_symmetry_1
 _geom_angle_site_symmetry_3
 _geom_angle_publ_flag
O1 C2 C3 118.9(17) . . ?
O1 C2 C7 106.5(14) . . ?
C3 C2 C7 108.1(14) . . ?
C2 C3 C4 110.8(15) . . ?
C3 C4 C5 110.2(13) . . ?
O9 C5 C6 108.5(12) . . ?
O9 C5 C10 111.8(14) . . ?
C6 C5 C10 111.6(12) . . ?
O9 C5 C4 106.3(14) . . ?
C6 C5 C4 109.1(13) . . ?
C10 C5 C4 109.3(12) . . ?
C7 C6 O8 59.3(11) . . ?
C7 C6 C5 120.8(15) . . ?
O8 C6 C5 112.1(11) . . ?
O8 C7 C6 61.0(11) . . ?
O8 C7 C2 115.7(13) . . ?
C6 C7 C2 124.1(12) . . ?
C7 O8 C6 59.7(11) . . ?
C11 N12 C13 122.9(12) . . ?
C10 C11 N12 125.0(15) . . ?
C11 C10 C15 113.2(15) . . ?
C11 C10 C5 127.8(15) . . ?
C15 C10 C5 119.0(11) . . ?
O16 C13 N12 116.9(11) . . ?
O16 C13 C14 128.2(15) . . ?
N12 C13 C14 114.9(15) . . ?
O17 C15 C14 122.1(15) . . ?
O17 C15 C10 115.1(15) . . ?
C14 C15 C10 122.8(11) . . ?
C15 C14 C13 120.0(14) . . ?
C15 C14 C18 117.8(11) . . ?
C13 C14 C18 122.0(15) . . ?
O19 C18 C20 117.9(16) . . ?
O19 C18 C14 118.1(17) . . ?
C20 C18 C14 124.0(12) . . ?
C22 C21 C20 124.6(13) . . ?
C18 C20 C25 113.9(12) . . ?
C18 C20 C21 111.7(13) . . ?
C25 C20 C21 113.9(15) . . ?
C26 C24 C25 114.2(13) . . ?
C26 C24 C23 112.4(14) . . ?
C25 C24 C23 111.8(13) . . ?
C22 C23 C29 112.1(14) . . ?
C22 C23 C24 115.2(15) . . ?
C29 C23 C24 109.5(14) . . ?
C21 C22 C23 119.7(13) . . ?
C21 C22 C30 118.8(15) . . ?
C23 C22 C30 121.4(18) . . ?
C32 C25 C20 109.8(13) . . ?
C32 C25 C24 114.1(14) . . ?
C20 C25 C24 109.6(11) . . ?
C31 C27 C26 118(2) . . ?
C31 C27 C28 110.4(18) . . ?
C26 C27 C28 110.5(17) . . ?
C24 C26 C27 115.0(15) . . ?
C29 C28 C27 113.3(18) . . ?
C33 C32 C25 124.1(12) . . ?
C32 C33 C34 126.2(15) . . ?
C23 C29 C28 112.8(19) . . ?
 
_refine_diff_density_max    0.300
_refine_diff_density_min   -0.215
_refine_diff_density_rms    0.066

_shelx_res_file
;
REM Best SHELXD solution   FINAL CC 77.94
REM Fragments: 32
REM
TITL Tang_ZZ-S           in space group C 2 2 2(1)    .
    a.res
    created by SHELXL-2018/3 at 12:15:01 on 15-Oct-2020
CELL 0.025100000 5.26    26.64    34.53  90.000  90.000  90.000
ZERR    4.00   0.0010   0.0020   0.0041   0.000   0.000   0.000
LATT -7
SYMM X,-Y,-Z
SYMM -X,Y,-Z+1/2
SYMM -X,-Y,Z+1/2
SFAC C 0.1361 0.3731 0.5482 3.2814 1.2266 13.0456 0.5971 =
 41.0202 0 0 0 0 0.68 12.011
SFAC N 0.1372 0.3287 0.5344 2.6733 1.0862 10.3165 0.4547 =
 32.7631 0 0 0 0 0.68 14.007
SFAC O 0.1433 0.3055 0.5103 2.2683 0.937 8.2625 0.3923 =
 25.6645 0 0 0 0 0.68 15.999
SFAC H 0.0367 0.5608 0.1269 3.7913 0.236 13.5557 0.129 =
 37.7229 0 0 0 0 0.23 1.008
UNIT 216 8 52 280
L.S. 10
LIST 6
FMAP 2
PLAN 20
ACTA
ISOR
SIMU
DELU
RIGU
DFIX 1.5 C23 C29
DFIX 1.5 C27 C31
WGHT    0.100000
EXTI 1448.830566
FVAR      18.94828
O1    3    0.241367    0.421628    0.734022    11.00000    0.05111    0.10676 =
         0.06766   -0.02133   -0.00572   -0.00042
AFIX  83
H1    4    0.346193    0.407901    0.748051    11.00000   -1.50000
AFIX   0
O1A   3    0.500000    0.273050    0.250000    10.50000    0.45297
C2    1    0.210771    0.394356    0.701370    11.00000    0.03378    0.07774 =
         0.06478   -0.01266    0.00312   -0.00797
AFIX  13
H2    4    0.029732    0.386202    0.699053    11.00000   -1.20000
AFIX   0
C3    1    0.354730    0.347374    0.696927    11.00000    0.04718    0.07747 =
         0.04514    0.02046    0.00657    0.00171
AFIX  23
H3A   4    0.289413    0.322451    0.714827    11.00000   -1.20000
H3AB  4    0.532024    0.353285    0.703167    11.00000   -1.20000
AFIX   0
C4    1    0.333820    0.327670    0.655817    11.00000    0.05270    0.04667 =
         0.06236   -0.00043    0.00640   -0.00528
AFIX  23
H4A   4    0.157252    0.328034    0.647716    11.00000   -1.20000
H4AB  4    0.393883    0.293267    0.654842    11.00000   -1.20000
AFIX   0
C5    1    0.491940    0.360154    0.628311    11.00000    0.03576    0.03862 =
         0.04609    0.00932   -0.00601    0.01509
C6    1    0.420296    0.413064    0.633517    11.00000    0.04418    0.04521 =
         0.04433   -0.01134   -0.01460   -0.00228
AFIX  13
H6    4    0.526311    0.438269    0.620611    11.00000   -1.20000
AFIX   0
C7    1    0.280422    0.429073    0.667490    11.00000    0.06223    0.04239 =
         0.06951   -0.01171   -0.00017    0.01352
AFIX  13
H7    4    0.302248    0.464484    0.674423    11.00000   -1.20000
AFIX   0
O9    3    0.738918    0.354443    0.639369    11.00000    0.03224    0.08115 =
         0.06694   -0.00235   -0.01861   -0.00936
AFIX  83
H9    4    0.830558    0.371484    0.625361    11.00000   -1.50000
AFIX   0
O8    3    0.143854    0.420341    0.631865    11.00000    0.04607    0.03582 =
         0.07542    0.00215   -0.00172    0.00692
N12   2    0.266497    0.294384    0.539070    11.00000    0.02817    0.05296 =
         0.07245   -0.01449    0.00117   -0.02181
AFIX  43
H12   4    0.143839    0.274471    0.533141    11.00000   -1.20000
AFIX   0
C11   1    0.280361    0.311832    0.575400    11.00000    0.03213    0.04000 =
         0.06087    0.00217    0.00516   -0.00994
AFIX  43
H11   4    0.159140    0.300569    0.592975    11.00000   -1.20000
AFIX   0
C10   1    0.449855    0.343218    0.587928    11.00000    0.02486    0.02945 =
         0.05488   -0.00530   -0.00710    0.00519
C13   1    0.435285    0.306584    0.511554    11.00000    0.02021    0.03326 =
         0.06105   -0.01265   -0.00585   -0.00264
C15   1    0.614176    0.361471    0.558038    11.00000    0.03729    0.02398 =
         0.04840   -0.00557   -0.00893   -0.00540
C14   1    0.601048    0.345356    0.521394    11.00000    0.04010    0.01822 =
         0.05117   -0.00182   -0.01096   -0.00226
O16   3    0.429740    0.281951    0.481647    11.00000    0.03614    0.03865 =
         0.06075   -0.01776    0.00052    0.00241
C18   1    0.754295    0.371622    0.492286    11.00000    0.04070    0.03193 =
         0.05585    0.00083   -0.01241   -0.00404
O17   3    0.776641    0.394981    0.568939    11.00000    0.04182    0.05198 =
         0.06038   -0.00587   -0.00816   -0.02334
AFIX  83
H17   4    0.861268    0.404042    0.550261    11.00000   -1.50000
AFIX   0
O19   3    0.911681    0.401406    0.503409    11.00000    0.05530    0.08052 =
         0.05061    0.00868   -0.00658   -0.03228
C21   1    0.912751    0.324224    0.436943    11.00000    0.03202    0.03385 =
         0.05852   -0.00087   -0.01104   -0.00565
AFIX  43
H21   4    0.941303    0.296549    0.452773    11.00000   -1.20000
AFIX   0
C20   1    0.730923    0.363696    0.451173    11.00000    0.04694    0.04423 =
         0.05558    0.00623   -0.00707    0.00223
AFIX  13
H20   4    0.560869    0.349502    0.447361    11.00000   -1.20000
AFIX   0
C24   1    0.760856    0.398223    0.386253    11.00000    0.01966    0.05630 =
         0.05806   -0.00669   -0.00953   -0.00717
AFIX  13
H24   4    0.616796    0.376320    0.380061    11.00000   -1.20000
AFIX   0
C23   1    0.997017    0.367536    0.378312    11.00000    0.04533    0.05929 =
         0.06171    0.00382    0.00854    0.01996
AFIX  13
H23   4    1.142075    0.390074    0.382168    11.00000   -1.20000
AFIX   0
C22   1    1.035058    0.326114    0.403450    11.00000    0.04581    0.03872 =
         0.05864   -0.00568   -0.00831   -0.00192
C25   1    0.735127    0.410629    0.428095    11.00000    0.03367    0.03534 =
         0.05628   -0.00386   -0.00308    0.00356
AFIX  13
H25   4    0.886263    0.429702    0.435771    11.00000   -1.20000
AFIX   0
C27   1    0.752056    0.429383    0.318935    11.00000    0.04480    0.11449 =
         0.06435    0.01183   -0.00104    0.01952
AFIX  13
H27   4    0.602266    0.408699    0.313439    11.00000   -1.20000
AFIX   0
C26   1    0.738576    0.441247    0.360545    11.00000    0.05997    0.08649 =
         0.06927    0.00911    0.00839    0.03816
AFIX  23
H26A  4    0.873161    0.464825    0.366704    11.00000   -1.20000
H26B  4    0.577880    0.457827    0.365671    11.00000   -1.20000
AFIX   0
C28   1    0.979478    0.396318    0.310495    11.00000    0.09549    0.09858 =
         0.06363    0.00644    0.02594    0.03711
AFIX  23
H28A  4    0.966842    0.383933    0.284149    11.00000   -1.20000
H28B  4    1.132895    0.416386    0.312301    11.00000   -1.20000
AFIX   0
C31   1    0.741041    0.471421    0.291341    11.00000    0.06457    0.13665 =
         0.09836    0.04550    0.00610    0.01726
AFIX 137
H31A  4    0.572390    0.485191    0.291078    11.00000   -1.50000
H31B  4    0.783806    0.459587    0.265902    11.00000   -1.50000
H31C  4    0.859740    0.496910    0.299042    11.00000   -1.50000
AFIX   0
C32   1    0.514886    0.440732    0.437216    11.00000    0.03352    0.04034 =
         0.08199    0.01267    0.02074    0.00131
AFIX  43
H32   4    0.356915    0.425054    0.437360    11.00000   -1.20000
AFIX   0
C33   1    0.523735    0.489439    0.445420    11.00000    0.04096    0.04734 =
         0.09767    0.00410    0.00873    0.01232
AFIX  43
H33   4    0.682758    0.504672    0.444744    11.00000   -1.20000
AFIX   0
C34   1    0.302472    0.522087    0.455630    11.00000    0.06492    0.06011 =
         0.10090    0.01298    0.01600    0.03467
AFIX 137
H34A  4    0.330156    0.536923    0.480613    11.00000   -1.50000
H34B  4    0.150315    0.502203    0.456258    11.00000   -1.50000
H34C  4    0.284872    0.548097    0.436576    11.00000   -1.50000
AFIX   0
C30   1    1.215501    0.287177    0.394410    11.00000    0.06610    0.06772 =
         0.04626    0.00238   -0.01398    0.02447
AFIX 137
H30A  4    1.235306    0.265495    0.416410    11.00000   -1.50000
H30B  4    1.376432    0.302051    0.388062    11.00000   -1.50000
H30C  4    1.155043    0.268032    0.372731    11.00000   -1.50000
AFIX   0
C29   1    1.001624    0.352635    0.337436    11.00000    0.07418    0.12873 =
         0.05421    0.01661    0.01909    0.03339
AFIX  23
H29A  4    0.862532    0.329580    0.332556    11.00000   -1.20000
H29B  4    1.159256    0.335024    0.332151    11.00000   -1.20000

AFIX   0
HKLF 4


REM  Tang_ZZ-S           in space group C 2 2 2(1)    .
REM wR2 = 0.3505, GooF = S = 1.778, Restrained GooF = 1.592 for all data
REM R1 = 0.1368 for 2502 Fo > 4sig(Fo) and 0.1570 for all 3001 data
REM 313 parameters refined using 810 restraints

END

WGHT      0.2000      0.0000

REM Highest difference peak  0.300,  deepest hole -0.215,  1-sigma level  0.066
Q1    1   0.5983  0.2468  0.2158  11.00000  0.05    0.30
Q2    1   0.5000  0.3297  0.2500  10.50000  0.05    0.29
Q3    1   1.4715  0.2957  0.3311  11.00000  0.05    0.22
Q4    1   0.4515  0.4599  0.4257  11.00000  0.05    0.18
Q5    1   0.0615  0.2697  0.6292  11.00000  0.05    0.17
Q6    1   0.2300  0.3007  0.5538  11.00000  0.05    0.17
Q7    1  -0.0183  0.3311  0.6949  11.00000  0.05    0.17
Q8    1   0.2613  0.5086  0.4533  11.00000  0.05    0.17
Q9    1   0.0036  0.2786  0.6457  11.00000  0.05    0.16
Q10   1   0.1470  0.5635  0.5033  11.00000  0.05    0.16
Q11   1   0.0571  0.3085  0.6950  11.00000  0.05    0.16
Q12   1   0.0453  0.3103  0.7309  11.00000  0.05    0.15
Q13   1   0.1745  0.2503  0.5317  11.00000  0.05    0.14
Q14   1   0.3014  0.3992  0.4830  11.00000  0.05    0.13
Q15   1  -0.0184  0.3277  0.6641  11.00000  0.05    0.13
Q16   1   0.2212  0.4235  0.7137  11.00000  0.05    0.13
Q17   1   0.4828  0.3631  0.3312  11.00000  0.05    0.12
Q18   1   0.2950  0.5364  0.4939  11.00000  0.05    0.12
Q19   1   0.3899  0.3648  0.2797  11.00000  0.05    0.12
Q20   1   0.1423  0.5611  0.4594  11.00000  0.05    0.12
;
_shelx_res_checksum   32328

_shelx_hkl_file
;
   0  -2   0  69838.  16453.   1
   0  -2   1  51383.  12131.  -1
   0  -2   1  52801.  12410.  -1
   0  -2  -1  87811.  20688.  -1
   0   2  -1  47908.  11269.  -1
   0  -2   2 134919.  31763.   1
   0  -2  -2 150560.  35422.   1
   0   2  -2 151223.  35559.   1
   0  -2   3  58655.  13961.   1
   0   2  -3  63846.  15131.   1
   0  -2   4 129773.  30597.   1
   0   2  -4 130985.  30871.   1
   0  -4   0 408872.  95975.   1
   0   4   0 388520.  91219.   1
   0   4   1  75920.  17926.   1
   0  -4   1 120809.  28424.   1
   0  -4   1 130391.  30574.   1
   0  -4  -1  80562.  19024.   1
   0   4  -1 112120.  26389.   1
   0   4  -1  90876.  21315.   1
   0   4   2 106517.  25086.   1
   0  -4   2  98605.  23233.   1
   0  -4   2  58564.  13778.   1
   0  -4  -2 121610.  28653.   1
   0   4  -2 102653.  24171.   1
   0   4  -2  53327.  12554.   1
   0   4   3 222684.  52344.   1
   0  -4   3 279670.  65721.   1
   0  -4  -3 297507.  69883.   1
   0   4  -3 283558.  66613.   1
   0  -4   4 482048. 113194.   1
   0  -4  -4 298422.  70158.   1
   0   4  -4 394923.  92774.   1
   0  -4   5  59936.  14361.   1
   0   4  -5  73634.  17526.   1
   0  -4   6 276469.  65104.  -1
   0   4  -6 292705.  68854.  -1
   0  -4   7 432654. 101738.   1
   0   4  -7 444546. 104482.   1
   0  -4   8 114841.  27212.   1
   0   4  -8 104276.  24720.   1
   0  -6   0 172582.  40613.   1
   0   6   0 175829.  41367.   1
   0   6   1 282415.  66362.   1
   0  -6   1 263663.  61948.   1
   0  -6   1 239881.  56231.   1
   0  -6  -1 292705.  68786.   1
   0   6  -1 248113.  58289.   1
   0   6  -1 270295.  63366.   1
   0   6   2 493482. 115893.   1
   0  -6   2 533272. 125200.   1
   0  -6   2 368625.  86394.   1
   0   6  -2 366796.  86165.   1
   0   6  -2 387377.  90807.   1
   0   6   3 7438.82 2261.15   1
   0  -6   3  15930. 3962.95   1
   0  -6   3  34210. 8111.13   1
   0  -6  -3 7461.69 2247.88   1
   0   6  -3  15479. 3846.33   1
   0   6  -3  43265.  10229.   1
   0   6   4  13634. 3583.35   1
   0  -6  -4  13892. 3713.69   1
   0   6  -4 3082.55 1208.32   1
   0  -6   5  14722. 3823.46   1
   0   6  -5  22090. 5481.36   1
   0  -6   6  92111.  21829.   1
   0  -6  -6 155500.  36657.   1
   0   6  -6 110908.  26229.   1
   0  -6   7 242854.  57192.   1
   0   6  -7 249028.  58610.   1
   0  -6   8 304139.  71553.   1
   0   6  -8 233935.  55111.   1
   0  -6   9  99543.  23668.   1
   0   6  -9 135559.  32083.   1
   0  -6  10 110588.  26229.   1
   0   6 -10 111022.  26321.   1
   0  -6  11 2803.56 1838.55   1
   0   6 -11 2538.30 1769.04   1
   0  -6  12 7367.93 2602.33   1
   0   6 -12  10631. 3174.02   1
   0  -8   0 558426. 131146.   1
   0   8   0 566201. 132952.   1
   0   8   1 9716.43 2670.93   1
   0  -8   1  21777. 5154.35   1
   0  -8  -1 8765.14 2487.99   1
   0   8  -1  20883. 4948.54   1
   0   8   2  30002. 7290.18   1
   0  -8   2  65013.  15276.   1
   0  -8  -2  25886. 6343.46   1
   0   8  -2  49691.  11690.   1
   0   8   3 129591.  30574.   1
   0  -8   3 183970.  43311.   1
   0  -8   3  99177.  23302.   1
   0  -8  -3 122227.  28859.   1
   0   8  -3 162680.  38303.   1
   0   8  -3  84770.  19934.   1
   0   8   4 171507.  40407.  -1
   0  -8   4 206997.  48708.  -1
   0  -8   4 181134.  42557.  -1
   0  -8  -4 234621.  55202.  -1
   0   8  -4 202424.  47633.  -1
   0   8  -4 202104.  47473.  -1
   0   8   5  46124.  11061.   1
   0  -8   5  10073. 2712.09   1
   0  -8  -5  52321.  12536.   1
   0   8  -5  40841. 9791.90   1
   0   8  -5  10087. 2732.68   1
   0   8   6  13005. 3517.03   1
   0  -8   6 9684.42 2712.09   1
   0  -8  -6  13073. 3562.77   1
   0   8  -6  10528. 2867.59   1
   0   8   7  39424. 9538.07   1
   0  -8   7  39058. 9428.30   1
   0  -8  -7  50835.  12243.   1
   0   8  -7  48045.  11509.   1
   0  -8   8  70089.  16682.   1
   0  -8  -8  68443.  16350.   1
   0   8  -8  78756.  18685.   1
   0  -8   9 123165.  29133.   1
   0   8  -9 101120.  23942.   1
   0  -8  10 215801.  50880.   1
   0   8 -10 121198.  28722.   1
   0  -8  11 202561.  47793.   1
   0   8 -11 282415.  66545.   1
   0  -8  12 530070. 124583.   1
   0   8 -12 507431. 119300.   1
   0  -8  13 251543.  59296.   1
   0   8 -13 276469.  65173.   1
   0  -8  14 4040.70 2130.11   1
   0   8 -14 5595.70 2540.59   1
   0  -8  15 8977.81 2940.77   1
   0   8 -15 4065.85 2221.81   1
   0  -8  16  66042.  15875.   1
   0   8 -16  72902.  17512.   1
   0   8 -17  40110. 9956.54   1
   0 -10   0 210359.  49531.   1
   0  10   0 184084.  43357.   1
   0  10   1 276926.  65104.   1
   0 -10   1 269837.  63458.   1
   0 -10   1 315801.  74068.   1
   0 -10  -1 299565.  70432.   1
   0  10  -1 280585.  65950.   1
   0  10  -1 303453.  71187.   1
   0  10   2 250400.  58930.   1
   0 -10   2 248571.  58450.   1
   0 -10   2 208964.  49028.   1
   0 -10  -2 286988.  67505.   1
   0  10  -2 300937.  70729.   1
   0  10  -2 214452.  50309.   1
   0  10   3 105168.  24857.  -1
   0 -10   3  90876.  21502.  -1
   0 -10   3 128584.  30185.  -1
   0 -10  -3 109398.  25863.  -1
   0  10  -3 121907.  28767.  -1
   0  10  -3 133066.  31237.  -1
   0  10   4 259090.  60965.  -1
   0 -10   4 206517.  48594.  -1
   0 -10   4 313057.  73474.  -1
   0 -10  -4 247198.  58152.  -1
   0  10  -4 197736.  46536.  -1
   0  10  -4 257489.  60462.  -1
   0  10   5 149531.  35285.   1
   0 -10   5 177887.  41893.   1
   0 -10   5 167093.  39309.   1
   0 -10  -5 171735.  40498.   1
   0  10  -5 174434.  41070.   1
   0  10  -5 130094.  30665.   1
   0  10   6  74137.  17672.   1
   0 -10   6  74663.  17704.   1
   0 -10   6  42099.  10123.   1
   0 -10  -6 116670.  27647.   1
   0  10  -6  72239.  17139.   1
   0  10  -6  48914.  11729.   1
   0  10   7 143357.  33890.   1
   0 -10   7 145644.  34347.   1
   0 -10  -7 181477.  42854.   1
   0  10  -7 142168.  33524.   1
   0  10   8  26961. 6782.52   1
   0 -10   8  30185. 7349.64   1
   0 -10  -8  16504. 4500.34   1
   0  10  -8  15694. 4056.71   1
   0  10   9 360393.  84816.   1
   0 -10   9 338211.  79533.   1
   0 -10  -9 419620.  98651.   1
   0  10  -9 551109. 129430.   1
   0 -10  10 210885.  49691.  -1
   0 -10 -10 137045.  32449.  -1
   0  10 -10 179396.  42305.  -1
   0 -10  11 249943.  58861.   1
   0  10 -11 221541.  52207.   1
   0 -10  12  13030. 3709.12  -1
   0  10 -12 6030.18 2394.24  -1
   0 -10  13  60233.  14505.   1
   0  10 -13 121816.  28927.   1
   0 -10  14  49120.  11973.   1
   0  10 -14  47793.  11710.   1
   0 -10  15 117974.  28036.   1
   0  10 -15 164715.  39012.   1
   0 -10  16  87560.  20954.   1
   0  10 -16  73062.  17587.   1
   0 -10  17 3180.88 1854.56   1
   0  10 -17 7610.33 2696.09   1
   0 -10  18 9833.06 2965.92   1
   0  10 -18  10542. 3192.31   1
   0 -10  19  27830. 6919.73   1
   0  10 -19  23554. 6000.45   1
   0 -10  20 5586.55 2069.74   1
   0  10 -20 5218.38 2146.81   1
   0  10 -21 2237.59 1518.41   1
   0 -12   0 244683.  57581.   1
   0  12   0 221861.  52230.   1
   0  12   1  27784. 6800.82   1
   0 -12   1  29682. 7045.50   1
   0 -12  -1  30162. 7365.65   1
   0  12  -1  49577.  11866.   1
   0  12  -1  37663. 8900.06   1
   0  12   2 264349.  62177.   1
   0 -12   2 281500.  66224.   1
   0 -12   2 268694.  63046.   1
   0 -12  -2 286759.  67459.   1
   0  12  -2 308941.  72650.   1
   0  12  -2 278298.  65287.   1
   0  12   3  12124. 3270.06   1
   0 -12   3  25726. 6121.65   1
   0 -12  -3  14811. 3898.92   1
   0  12  -3  28699. 6805.39   1
   0  12   4 167322.  39447.   1
   0 -12   4 140796.  33204.   1
   0 -12   4 187308.  43974.   1
   0 -12  -4 198353.  46741.   1
   0  12  -4 139652.  32952.   1
   0  12  -4 163595.  38418.   1
   0  12   5  87468.  20759.   1
   0 -12   5 128333.  30277.   1
   0 -12   5 155225.  36542.   1
   0 -12  -5  95815.  22733.   1
   0  12  -5 124537.  29408.   1
   0  12  -5 149874.  35262.   1
   0  12   6  47725.  11512.   1
   0 -12   6  48845.  11685.   1
   0 -12   6  45392.  10944.   1
   0 -12  -6  54631.  13149.   1
   0  12  -6  52275.  12488.   1
   0  12  -6  93277.  22090.   1
   0  12   7 113332.  26892.   1
   0 -12   7 139881.  32998.   1
   0 -12   7 138692.  32724.   1
   0 -12  -7 142922.  33844.   1
   0  12  -7 127784.  30162.   1
   0  12  -7 162017.  38166.   1
   0  12   8 246970.  58198.   1
   0 -12   8 206883.  48731.   1
   0 -12  -8 294306.  69357.   1
   0  12  -8 219552.  51681.   1
   0  12  -8 114178.  27007.   1
   0  12   9  42122.  10300.   1
   0 -12   9  33478. 8138.57   1
   0 -12  -9  38212. 9492.33   1
   0  12  -9  43883.  10556.   1
   0  12  10  79350.  18976.   1
   0 -12  10  33112. 8053.96   1
   0 -12 -10  58244.  14125.   1
   0  12 -10  35879. 8712.55   1
   0  12  11  89824.  21436.  -1
   0 -12  11 134050.  31672.  -1
   0 -12 -11 131306.  31169.  -1
   0  12 -11 184656.  43517.  -1
   0 -12  12 159661.  37686.   1
   0 -12 -12  91905.  21989.   1
   0  12 -12 194283.  45804.   1
   0 -12  13  34484. 8451.86  -1
   0  12 -13  39241. 9560.93  -1
   0 -12  14  22328. 5767.20   1
   0  12 -14  26412. 6665.90   1
   0 -12  16 8042.53 2574.89   1
   0  12 -16  12337. 3510.17   1
   0 -12  17 7150.69 2396.52   1
   0  12 -17 6581.29 2391.95   1
   0 -12  18  40224. 9785.04   1
   0  12 -18  65264.  15667.   1
   0 -12  19  11050. 3174.02   1
   0  12 -19 8968.66 2833.29   1
   0 -12  20 4182.48 1764.69  -1
   0  12 -20 3992.68 1869.65  -1
   0 -12  21  13942. 3832.61   1
   0  12 -21 9723.29 3130.57   1
   0 -12  22 3533.04 1862.79   1
   0  12 -22 2853.87 1980.33   1
   0 -12  23 3320.37 1927.28   1
   0  12 -23 3475.87 2072.03   1
   0 -12  24 1980.10 1697.23   1
   0  12 -24 1021.95 1929.34   1
   0  12 -25 2460.55 2137.43   1
   0 -14   0 396981.  93345.   1
   0  14   0 388520.  91356.   1
   0  14   1 101303.  24011.   1
   0 -14   1  59959.  14368.   1
   0 -14   1  75623.  17812.   1
   0 -14  -1  59021.  14141.   1
   0  14  -1  73130.  17411.   1
   0  14   2  89504.  21258.   1
   0 -14   2  88223.  20954.   1
   0 -14   2  80448.  18937.   1
   0 -14  -2  72101.  17224.   1
   0  14  -2  77773.  18493.   1
   0  14  -2  78093.  18379.   1
   0  14   3 4326.54 1688.77  -1
   0 -14   3 6661.32 2077.29  -1
   0 -14   3  16741. 4049.85  -1
   0 -14  -3 3690.83 1853.87  -1
   0  14  -3 6830.54 2146.58  -1
   0  14  -3  11251. 2782.98  -1
   0  14   4  33913. 8280.35   1
   0 -14   4  23965. 5929.56   1
   0 -14   4  21237. 5115.48   1
   0 -14  -4  28424. 7070.65   1
   0  14  -4  26046. 6412.07   1
   0  14  -4  23439. 5623.14   1
   0  14   5  88886.  21111.   1
   0 -14   5 103842.  24560.   1
   0 -14   5 101898.  24011.   1
   0 -14  -5 116007.  27487.   1
   0  14  -5 110336.  26092.   1
   0  14  -5 111411.  26206.   1
   0  14   6  86211.  20496.   1
   0 -14   6 107295.  25360.   1
   0 -14   6 115641.  27304.   1
   0 -14  -6  71438.  17061.   1
   0  14  -6 100846.  23851.   1
   0  14  -6 122456.  28882.   1
   0  14   7 7219.29 2387.37   1
   0 -14   7 2890.46 1304.60   1
   0 -14   7 2289.04 1944.89   1
   0 -14  -7 5266.40 2170.13   1
   0  14  -7 4113.88 1511.09   1
   0  14  -7  10135. 3208.32   1
   0  14   8  62589.  15081.   1
   0 -14   8  59822.  14263.   1
   0 -14   8  36131. 8874.91   1
   0 -14  -8  60691.  14708.   1
   0  14  -8  71690.  17027.   1
   0  14  -8  33615. 8326.08   1
   0  14   9 179716.  42511.   1
   0 -14   9 166179.  39195.   1
   0 -14  -9 200343.  47404.   1
   0  14  -9 193620.  45621.   1
   0  14  -9 134278.  31740.   1
   0  14  10 251086.  59273.   1
   0 -14  10 255202.  60096.   1
   0 -14 -10 269837.  63709.   1
   0  14 -10 285845.  67276.   1
   0  14  11  32175. 8163.72   1
   0 -14  11  36771. 8932.08   1
   0 -14 -11  48594.  12065.   1
   0  14 -11  34782. 8463.29   1
   0  14  12 132540.  31557.  -1
   0 -14  12  82186.  19529.  -1
   0 -14 -12 132540.  31626.  -1
   0  14 -12  66865.  15918.  -1
   0  14  13 6938.02 2988.79   1
   0 -14 -13 8328.37 3565.05   1
   0 -14  14 109055.  25840.   1
   0  14 -14 101761.  24125.   1
   0 -14  15 3242.62 1564.14   1
   0  14 -15 8428.99 2522.29   1
   0 -14  16 7075.23 2321.06   1
   0  14 -16 2650.35 1541.05   1
   0 -14  17 3743.42 1727.87   1
   0  14 -17 5431.05 2099.24   1
   0 -14  18 3340.95 1685.11   1
   0  14 -18 1765.83 1624.97   1
   0 -14  19  20428. 5323.57   1
   0  14 -19  27235. 6935.74   1
   0 -14  20  10075. 3158.01   1
   0  14 -20 8906.92 3077.98   1
   0 -14  21  18068. 4834.21   1
   0  14 -21  32906. 8303.22   1
   0 -14  22  29751. 7500.56  -1
   0  14 -22  34096. 8563.91  -1
   0 -14  23 8728.55 2888.17   1
   0  14 -23  12627. 3919.50   1
   0 -14  24 1656.30 1785.27   1
   0  14 -24  342.10 2026.75   1
   0 -14  25 6149.09 2597.76   1
   0  14 -25 5282.41 2622.91   1
   0 -14  26  42214.  10444.   1
   0  14 -26  45461.  11262.   1
   0 -14  27  685.80 1916.53   1
   0  14 -27  776.35 2202.15   1
   0 -14  28  29751. 7594.32   1
   0  14 -28  27441. 7226.15   1
   0  14 -29  10210. 3784.58   1
   0  14 -30 2047.33 2170.59   1
   0 -16   0  33067. 8111.13   1
   0  16   0  27670. 6805.39   1
   0  16   1 122502.  28950.   1
   0 -16   1  82849.  19696.   1
   0 -16   1  78550.  18514.   1
   0 -16  -1  73771.  17583.   1
   0  16  -1  72673.  17281.   1
   0  16   2 1711.64 1276.93   1
   0 -16   2  15381. 3782.30   1
   0 -16  -2 1597.99 1378.91   1
   0  16  -2  18591. 4511.77   1
   0  16   3  74663.  17816.   1
   0 -16   3  78459.  18674.   1
   0 -16   3  66407.  15646.   1
   0 -16  -3  72719.  17409.   1
   0  16  -3  80768.  19179.   1
   0  16  -3  84999.  19995.   1
   0  16   4 4868.51 1870.80   1
   0 -16   4  10149. 2584.04   1
   0 -16  -4 4203.06 1973.24   1
   0  16  -4 8906.92 2305.05   1
   0 -16   5 1250.17 1100.62  -1
   0 -16   5  11397. 2913.33  -1
   0 -16  -5 8026.52 2673.22  -1
   0  16  -5 1987.88 1182.25  -1
   0  16  -5 8804.02 2343.93  -1
   0  16   6  25314. 6366.33   1
   0 -16   6  11763. 3132.86   1
   0 -16   6 5460.78 1940.08   1
   0 -16  -6  16801. 4566.65   1
   0  16  -6 9259.08 2558.88   1
   0  16  -6 8008.23 2300.48   1
   0  16   7 101052.  24057.   1
   0 -16   7  65836.  15678.   1
   0 -16   7  91676.  21720.   1
   0 -16  -7 119300.  28379.   1
   0  16  -7  62954.  14992.   1
   0  16  -7  84336.  19993.   1
   0  16   8  10965. 3391.26   1
   0 -16   8  15479. 3992.68   1
   0 -16   8  20535. 5312.14   1
   0 -16  -8 9526.63 3224.33   1
   0  16  -8  17256. 4369.99   1
   0  16  -8  22461. 5790.07   1
   0  16   9  93483.  22429.   1
   0 -16   9 113355.  26824.   1
   0 -16   9  95564.  22655.   1
   0 -16  -9  99017.  23737.   1
   0  16  -9 159387.  37594.   1
   0  16  -9 121793.  28813.   1
   0  16  10  70661.  17196.   1
   0 -16  10  44203.  10659.   1
   0 -16  10  27281. 6798.53   1
   0 -16 -10  67917.  16650.   1
   0  16 -10  41642.  10039.   1
   0  16 -10  34210. 8458.72   1
   0  16  11  18008. 5408.18   1
   0 -16  11  27807. 6851.13   1
   0 -16 -11  27784. 7672.07   1
   0  16 -11  24217. 6023.32   1
   0  16  12 5936.42 3032.24   1
   0 -16  12 4946.26 1789.84   1
   0 -16 -12 1094.44 2831.01   1
   0  16 -12 5792.36 1997.03   1
   0  16  13  13238. 4335.69   1
   0 -16  13  18600. 4742.73   1
   0 -16 -13  14594. 4875.37   1
   0  16 -13  14770. 3866.91   1
   0  16  14  11278. 3994.97   1
   0 -16  14  21816. 5474.50   1
   0 -16 -14  19154. 5872.39   1
   0  16 -14  17523. 4507.20   1
   0  16  15  20204. 5863.25   1
   0 -16  15  14235. 3766.29   1
   0 -16 -15 8088.26 3887.49   1
   0  16 -15  28036. 6917.44   1
   0 -16  16 7882.45 2414.82   1
   0 -16 -16  14308. 5190.94   1
   0  16 -16 5785.50 2055.11   1
   0 -16  17  40041. 9753.02   1
   0  16 -17  41573.  10114.   1
   0 -16  18  93940.  22369.   1
   0  16 -18  79739.  19037.   1
   0 -16  19 2842.44 1874.68  -1
   0  16 -19 4884.51 2229.36  -1
   0 -16  20 6643.03 2536.01   1
   0  16 -20 6309.16 2542.87   1
   0 -16  21  31557. 7937.34   1
   0  16 -21  47450.  11649.   1
   0 -16  22 5017.15 2305.05   1
   0  16 -22 4029.27 2423.96   1
   0 -16  23  25383. 6599.58   1
   0  16 -23  24331. 6471.52   1
   0 -16  24  13304. 3924.08   1
   0  16 -24 8902.35 3455.29   1
   0 -16  25  12044. 3752.57   1
   0  16 -25 7987.64 3206.03   1
   0 -16  26  225.52 1990.39   1
   0  16 -26 1435.85 2271.21   1
   0 -16  27 7790.98 3155.73   1
   0  16 -27  12996. 4353.99   1
   0 -16  28 1197.12 2325.63   1
   0  16 -28 1361.76 2723.53   1
   0 -16  29 9121.88 3517.03   1
   0  16 -29  10711. 4150.46   1
   0 -16  30 1824.38 2307.34   1
   0  16 -30 2259.32 2739.54   1
   0 -16  31 6313.74 2968.21   1
   0  16 -31 1231.88 2769.26   1
   0 -16  32 1535.56 2206.72   1
   0  16 -32 1546.53 2682.37   1
   0 -18   0  44729.  10846.   1
   0  18   0  48479.  11672.   1
   0 -18   1  11688. 3295.22   1
   0 -18  -1  21189. 5396.75   1
   0  18  -1  10912. 2993.37   1
   0  18   2 5424.19 1956.55   1
   0 -18   2 7747.53 2389.66   1
   0 -18   2  11530. 2981.93   1
   0 -18  -2 6777.95 2311.91   1
   0  18  -2 4982.84 1762.63   1
   0  18  -2  18603. 4548.36   1
   0  18   3  47061.  11432.   1
   0 -18   3  59090.  14164.   1
   0 -18   3  57558.  13590.   1
   0 -18  -3  75715.  18159.   1
   0  18  -3  69540.  16574.   1
   0  18  -3  61239.  14461.   1
   0  18   4 2305.05 1651.50   1
   0 -18   4 3455.29 1557.28   1
   0 -18   4 8557.05 2234.62   1
   0 -18  -4 4761.03 2198.26   1
   0  18  -4 5051.45 1753.94   1
   0  18  -4 6354.90 1767.43   1
   0  18   5  73016.  17514.   1
   0 -18   5  88520.  21024.   1
   0 -18   5  71050.  16750.   1
   0 -18  -5  78802.  18925.   1
   0  18  -5  82689.  19648.   1
   0  18  -5  74228.  17491.   1
   0  18   6 4822.77 2027.90   1
   0 -18   6 6037.04 2058.08   1
   0 -18   6 3274.64 1332.04   1
   0 -18  -6 7045.50 2689.23   1
   0  18  -6 5449.34 1862.56   1
   0  18  -6  10293. 2686.94   1
   0  18   7  21829. 5655.15  -1
   0 -18   7  35651. 8685.10  -1
   0 -18   7  28287. 6954.03  -1
   0 -18  -7  24011. 6226.84  -1
   0  18  -7  34187. 8323.80  -1
   0  18  -7  29453. 7141.54  -1
   0  18   8  13650. 3869.19   1
   0 -18   8  18950. 4809.05   1
   0 -18   8  33638. 8310.08   1
   0 -18  -8  24994. 6501.25   1
   0  18  -8  14315. 3766.29   1
   0  18  -8  28424. 7098.10   1
   0  18   9 3112.28 2241.48   1
   0 -18   9 4422.59 1707.29   1
   0 -18   9 5019.43 2423.96   1
   0 -18  -9 2027.67 2128.74   1
   0  18  -9 3034.53 1472.21   1
   0  18  -9 7068.37 2808.14   1
   0  18  10  39012. 9915.38   1
   0 -18  10  24903. 6210.83   1
   0 -18  10  20718. 5435.62   1
   0 -18 -10  40155.  10252.   1
   0  18 -10  37206. 9044.13   1
   0  18 -10  25726. 6668.19   1
   0  18  11 7875.59 3798.30   1
   0 -18  11 7351.93 2300.48   1
   0 -18  11 8772.00 3025.38   1
   0 -18 -11 9487.76 3985.82   1
   0  18 -11  10432. 2911.04   1
   0  18 -11 7088.95 2988.79   1
   0  18  12  42145.  10915.   1
   0 -18  12  50354.  12104.   1
   0 -18 -12  51200.  13156.   1
   0  18 -12  33272. 8140.86   1
   0  18 -12  26755. 6979.18   1
   0  18  13  10279. 4509.49   1
   0 -18  13  16769. 4360.85   1
   0 -18 -13  10892. 4838.78   1
   0  18 -13  16145. 4214.49   1
   0  18  14  17000. 5758.06   1
   0 -18  14  15863. 4161.90   1
   0 -18 -14  15266. 5732.90   1
   0  18 -14  13060. 3521.61   1
   0  18  15 8689.68 4193.91   1
   0 -18  15 1604.16 1375.48   1
   0 -18 -15 7864.16 4413.44   1
   0  18 -15 1793.28 1542.42   1
   0  18  16  43220.  11313.   1
   0 -18  16  32746. 8058.53   1
   0 -18 -16  41528.  11143.   1
   0  18 -16  45141.  10928.   1
   0  18  17  32792. 8934.36   1
   0 -18  17  45712.  11088.   1
   0 -18 -17  34713. 9551.79   1
   0  18 -17  53830.  12975.   1
   0 -18  18 4235.07 1846.56   1
   0 -18 -18 9313.96 4685.57   1
   0  18 -18 -437.46 1480.45   1
   0 -18  19  16071. 4347.13   1
   0  18 -19  24354. 6194.83   1
   0 -18  20  28653. 7235.30  -1
   0  18 -20  25840. 6567.57  -1
   0 -18  21 2111.59 1903.95   1
   0  18 -21  804.71 1930.71   1
   0 -18  22  34553. 8678.24   1
   0  18 -22  36268. 9112.73   1
   0 -18  23  15763. 4534.64   1
   0  18 -23  22705. 6137.66   1
   0 -18  24  46192.  11429.   1
   0  18 -24  36131. 9220.21   1
   0 -18  25  12236. 4054.42   1
   0  18 -25  11731. 4026.98   1
   0 -18  26  829.64 2371.37   1
   0  18 -26  890.46 2748.68   1
   0 -18  27 5250.40 2869.88   1
   0  18 -27 6464.66 3585.64   1
   0 -18  28  926.59 2330.21   1
   0  18 -28 1649.21 2782.98   1
   0 -18  29 4418.02 2913.33   1
   0  18 -29 2892.75 3027.67   1
   0 -18  30 2011.89 2609.19   1
   0  18 -30  345.76 2826.43   1
   0 -20   0 5991.30 2273.04   1
   0  20   0 5888.40 2022.64   1
   0  20   1  27464. 6839.69   1
   0 -20   1  21996. 5620.85   1
   0 -20  -1  34278. 8472.44   1
   0  20  -1  14816. 3930.94   1
   0  20   2  23576. 5982.16   1
   0 -20   2  23965. 6048.47   1
   0 -20   2  30162. 7223.87   1
   0 -20  -2  24445. 6258.86   1
   0  20  -2  25772. 6430.36   1
   0  20  -2  21608. 5225.24   1
   0  20   3  12223. 3521.61   1
   0 -20   3  16524. 4347.13   1
   0 -20   3  12364. 3121.42   1
   0 -20  -3  21758. 5726.04   1
   0  20  -3  13009. 3510.17   1
   0  20  -3  25497. 6114.79   1
   0  20   4  13227. 3798.30   1
   0 -20   4  15298. 4061.28   1
   0 -20   4 9652.40 2504.00   1
   0 -20  -4 8858.90 3135.14   1
   0  20  -4 9666.12 2792.13   1
   0  20  -4 6064.48 1742.51   1
   0  20   5 1853.65 1765.38   1
   0 -20   5 7544.01 2309.62   1
   0 -20   5 4324.26 1433.80   1
   0 -20  -5 2547.45 2134.69   1
   0  20  -5  12769. 3439.28   1
   0  20  -5 6487.53 1858.91   1
   0  20   6 1390.58 1693.34   1
   0 -20   6  859.59 1188.89   1
   0 -20   6 2954.49 1223.87   1
   0 -20  -6  358.33 2127.60   1
   0  20  -6 1709.58 1306.20   1
   0  20  -6 4418.02 1478.39   1
   0  20   7 9899.37 3219.75   1
   0 -20   7  23188. 5790.07   1
   0 -20   7  17825. 4466.04   1
   0 -20  -7  11859. 3780.01   1
   0  20  -7 8371.82 2465.12   1
   0  20  -7  14301. 3629.08   1
   0  20   8 8047.10 3039.10  -1
   0 -20   8  14347. 3775.44  -1
   0 -20   8  17370. 4571.23  -1
   0 -20  -8 7788.70 3025.38  -1
   0  20  -8  15342. 3967.52  -1
   0  20  -8  12012. 3311.22  -1
   0  20   9  32129. 8232.33   1
   0 -20   9  22582. 5659.72   1
   0 -20   9  30117. 7491.42   1
   0 -20  -9  16997. 5076.60   1
   0  20  -9  24903. 6158.24   1
   0  20  -9  30391. 7557.73   1
   0  20  10  17846. 5348.73   1
   0 -20  10  17583. 4504.91   1
   0 -20  10  11331. 3446.14   1
   0 -20 -10  15351. 4918.82   1
   0  20 -10  17340. 4438.60   1
   0  20 -10  16325. 4584.95   1
   0  20  11  13544. 4765.60   1
   0 -20  11 5803.79 1996.80   1
   0 -20  11 2524.58 2141.78   1
   0 -20 -11 7912.18 3855.47   1
   0  20 -11 8927.50 2586.32   1
   0  20 -11 5646.00 2638.92   1
   0  20  12 5428.76 3720.55   1
   0 -20  12 9281.95 2764.69   1
   0 -20  12 4319.68 2268.46   1
   0 -20 -12 5918.13 3962.95   1
   0  20 -12  15731. 4095.58   1
   0  20 -12 5428.76 2730.39   1
   0  20  13  11724. 4726.73  -1
   0 -20  13 8458.72 2625.20  -1
   0 -20 -13  15147. 5623.14  -1
   0  20 -13  18502. 4793.04  -1
   0  20 -13 4070.43 2590.90  -1
   0  20  14 2469.70 3642.80  -1
   0 -20  14 5472.21 2107.48  -1
   0 -20 -14 1251.54 3821.17  -1
   0  20 -14 7367.93 2462.84  -1
   0  20  15 2118.22 3690.83   1
   0 -20  15  712.78 1397.89   1
   0 -20 -15 -535.33 4127.60   1
   0  20 -15  -76.70 1426.25   1
   0  20  16 4324.26 4230.50   1
   0 -20  16 3704.55 1823.23   1
   0 -20 -16 2471.98 4767.89   1
   0  20 -16 3683.97 1845.64   1
   0  20  17  24331. 7939.62   1
   0 -20  17  26412. 6670.47   1
   0 -20 -17  32449. 9672.98   1
   0  20 -17  20601. 5360.16   1
   0  20  18  13734. 5442.48  -1
   0 -20  18  15552. 4230.50  -1
   0 -20 -18  26092. 8223.18  -1
   0  20 -18  16417. 4422.59  -1
   0  20  19 5289.27 4191.63   1
   0 -20  19 5941.00 2279.44   1
   0 -20 -19  11742. 5616.28   1
   0  20 -19  10604. 3194.60   1
   0 -20  20 3853.19 1979.65   1
   0 -20 -20 8435.85 5337.29   1
   0  20 -20  166.04 1646.47   1
   0 -20  21 4280.81 2096.96   1
   0  20 -21  10409. 3240.34   1
   0 -20  22 6334.32 2538.30   1
   0  20 -22 4230.50 2171.50   1
   0 -20  23  32815. 8378.68   1
   0  20 -23  29088. 7447.97   1
   0 -20  24 4502.63 2684.65   1
   0  20 -24 1685.11 2522.29   1
   0 -20  25 9307.10 3491.88   1
   0  20 -25  701.58 2584.04   1
   0 -20  26  12353. 4148.18   1
   0  20 -26 6478.38 3231.19   1
   0 -20  27  15406. 4774.75   1
   0  20 -27  19790. 5792.36   1
   0 -20  28 5174.93 2956.78   1
   0  20 -28 3356.96 2972.78   1
   0 -22   0 9245.36 2986.51   1
   0  22   0  10306. 3084.84   1
   0  22   1  13787. 3889.77   1
   0 -22   1 3119.14 1911.96   1
   0 -22  -1 6101.07 2391.95   1
   0  22  -1 5200.09 2043.45   1
   0  22   2 8143.14 2728.10   1
   0 -22   2  12790. 3672.53   1
   0 -22   2  14340. 3642.80   1
   0 -22  -2 8021.94 2837.87   1
   0  22  -2  13382. 3748.00   1
   0  22  -2 7946.48 2188.20   1
   0  22   3  25886. 6675.04   1
   0 -22   3  24674. 6300.02   1
   0 -22   3  32380. 7754.39   1
   0 -22  -3  31809. 8065.39   1
   0  22  -3  37571. 9206.49   1
   0  22  -3  31740. 7608.04   1
   0  22   4  12961. 3921.79   1
   0 -22   4  10046. 3050.53   1
   0 -22   4 8470.15 2250.40   1
   0 -22  -4  11050. 3777.72   1
   0  22  -4 7255.88 2467.41   1
   0  22  -4  11189. 2858.45   1
   0  22   5  71919.  17377.   1
   0 -22   5  56506.  13613.   1
   0 -22   5  54356.  12863.   1
   0 -22  -5  61399.  15010.   1
   0  22  -5  49783.  12031.   1
   0  22  -5  52412.  12403.   1
   0  22   6 6931.16 2837.87   1
   0 -22   6 8465.58 2664.07   1
   0 -22   6 6608.73 1965.70   1
   0 -22  -6  12200. 3962.95   1
   0  22  -6 2385.09 1549.05   1
   0  22  -6  11123. 2929.34   1
   0  22   7 5346.44 2572.60   1
   0 -22   7 2230.50 1501.26   1
   0 -22   7 3688.54 1561.17   1
   0 -22  -7 3825.75 2481.13   1
   0  22  -7 3254.06 1612.39   1
   0  22  -7 3517.03 1502.17   1
   0  22   8 6325.17 2627.48   1
   0 -22   8 6931.16 2330.21   1
   0 -22   8  20304. 5115.48   1
   0 -22  -8 5410.47 2636.63   1
   0  22  -8 8529.61 2650.35   1
   0  22  -8  18960. 4783.90   1
   0  22   9 5417.33 2602.33   1
   0 -22   9 8785.72 2702.95   1
   0 -22   9  20128. 5202.37   1
   0 -22  -9 3240.34 2627.48   1
   0  22  -9  11159. 3162.59   1
   0  22  -9  19854. 5110.90   1
   0  22  10 5188.65 2824.15  -1
   0 -22  10 7745.25 2421.68  -1
   0 -22  10  13485. 3853.19  -1
   0 -22 -10  10725. 3937.80  -1
   0  22 -10 8916.07 2677.79  -1
   0  22 -10  16783. 4580.38  -1
   0  22  11  31580. 8573.05   1
   0 -22  11  30139. 7436.54   1
   0 -22  11  24994. 6393.77   1
   0 -22 -11  26824. 7491.42   1
   0  22 -11  31077. 7649.20   1
   0  22 -11  31489. 7919.04   1
   0  22  12 5687.17 3942.37   1
   0 -22  12 6910.58 2236.22   1
   0 -22  12 -265.04 2114.56   1
   0 -22 -12 4541.50 3965.24   1
   0  22 -12 5561.39 1998.17   1
   0  22 -12 1199.63 2316.49   1
   0  22  13  17638. 6201.69   1
   0 -22  13  19982. 5133.77   1
   0 -22  13 7162.12 2929.34   1
   0 -22 -13  18843. 6352.61   1
   0  22 -13  19975. 5129.20   1
   0  22 -13 9515.20 3537.61   1
   0  22  14  46032.  12177.  -1
   0 -22  14  47770.  11603.  -1
   0 -22 -14  44843.  12040.  -1
   0  22 -14  28081. 7022.63  -1
   0  22 -14  24651. 6700.20  -1
   0  22  15  31397. 9247.65   1
   0 -22  15  36497. 9005.25   1
   0 -22 -15  29957. 9064.71   1
   0  22 -15  23622. 6064.48   1
   0  22 -15  22655. 6231.41   1
   0  22  16  47016.  12643.   1
   0 -22  16  38486. 9492.33   1
   0 -22 -16  46124.  12708.   1
   0  22 -16  43883.  10718.   1
   0  22  17  35468.  10295.   1
   0 -22  17  48685.  11882.   1
   0 -22 -17  31123. 9517.49   1
   0  22 -17  50332.  12243.   1
   0  22  18 5040.01 4836.49   1
   0 -22  18 3565.05 1904.18   1
   0 -22 -18 4228.21 4921.10   1
   0  22 -18 3016.23 1867.82   1
   0  22  19 3029.95 4045.27   1
   0 -22  19 3720.55 1924.99   1
   0 -22 -19  838.33 4539.21   1
   0  22 -19  10185. 3105.42   1
   0  22  20 1942.83 3674.82   1
   0 -22  20 5453.92 2284.24   1
   0 -22 -20  199.38 4209.92   1
   0  22 -20 1840.61 1831.01   1
   0  22  21 2776.12 3789.16   1
   0 -22  21 9485.47 3164.87   1
   0 -22 -21 3480.44 4536.93   1
   0  22 -21  11338. 3453.00   1
   0 -22  22 7726.95 2908.76   1
   0 -22 -22 1290.65 3976.67   1
   0  22 -22  489.59 1887.95   1
   0 -22  23 1565.29 1998.40   1
   0  22 -23 8854.33 3116.85   1
   0 -22  24  389.43 2063.57   1
   0  22 -24  535.79 2078.89   1
   0 -22  25 2016.69 2285.61   1
   0  22 -25  162.45 2108.16   1
   0 -24   0  10643. 3276.92   1
   0  24   0  10197. 3080.26   1
   0  24   1  29225. 7367.93   1
   0 -24   1  18454. 4966.84   1
   0 -24  -1  17533. 4829.63   1
   0  24  -1  14329. 4029.27   1
   0  24   2 2071.34 1843.13   1
   0 -24   2 4470.61 2107.02   1
   0 -24   2 7383.94 2282.64   1
   0 -24  -2 2478.85 2041.62   1
   0  24  -2 2209.69 1767.66   1
   0  24   3  43471.  10775.   1
   0 -24   3  39104. 9654.69   1
   0 -24   3  52550.  12502.   1
   0 -24  -3  38943. 9725.58   1
   0  24  -3  40041. 9805.62   1
   0  24  -3  45644.  10894.   1
   0  24   4 5261.83 2613.76   1
   0 -24   4 1918.82 1625.66   1
   0 -24   4 2194.14 1158.70   1
   0 -24  -4 4168.76 2616.05   1
   0  24  -4  593.18 1417.33   1
   0  24  -4 2954.49 1398.58   1
   0  24   5  25978. 6892.29   1
   0 -24   5  31100. 7779.55   1
   0 -24   5  28104. 6755.08   1
   0 -24  -5  34850. 8991.53   1
   0  24  -5  28196. 7068.37   1
   0  24  -5  26709. 6432.65   1
   0  24   6 -317.86 2007.09  -1
   0 -24   6 7324.48 2490.28  -1
   0 -24   6 2451.40 1204.21  -1
   0 -24  -6 -106.81 2398.81  -1
   0  24  -6 8047.10 2609.19  -1
   0  24  -6 8513.60 2357.65  -1
   0  24   7 5197.80 2847.01   1
   0 -24   7 3489.59 1813.86   1
   0 -24   7 4205.35 1539.67   1
   0 -24  -7 3404.98 2741.82   1
   0  24  -7 2748.68 1700.43   1
   0  24  -7 4257.94 1543.33   1
   0  24   8  18719. 5401.32   1
   0 -24   8  20890. 5401.32   1
   0 -24   8  16840. 4239.65   1
   0 -24  -8  14580. 4660.41   1
   0  24  -8  14914. 4068.14   1
   0  24  -8  15406. 3901.21   1
   0  24   9 1746.17 2241.94   1
   0 -24   9 3043.67 1768.58   1
   0 -24   9 1100.16 1676.19   1
   0 -24  -9  780.01 2536.01   1
   0  24  -9  755.09 1443.17   1
   0  24  -9 -190.01 1328.61   1
   0  24  10 1737.94 2483.42  -1
   0 -24  10 2231.88 1662.93  -1
   0 -24  10 2579.46 2051.45  -1
   0 -24 -10 5417.33 3201.46  -1
   0  24 -10 1755.77 1545.16  -1
   0  24 -10 3187.74 1933.91  -1
   0  24  11 5652.86 3327.23   1
   0 -24  11  15152. 4145.89   1
   0 -24  11 9833.06 3350.10   1
   0 -24 -11 8481.58 3841.75   1
   0  24 -11  11004. 3217.47   1
   0  24 -11 6903.72 2904.18   1
   0  24  12 1631.83 3402.70   1
   0 -24  12  622.23 1407.73   1
   0 -24  12  520.47 2166.47   1
   0 -24 -12  745.71 3437.00   1
   0  24 -12  223.97 1394.92   1
   0  24 -12  658.13 2240.11   1
   0  24  13  24468. 7463.98   1
   0 -24  13  14246. 3962.95   1
   0 -24  13 5577.40 2696.09   1
   0 -24 -13  17045. 6053.05   1
   0  24 -13  14864. 4084.15   1
   0  24 -13 9485.47 3327.23   1
   0  24  14  15385. 6085.06   1
   0 -24  14  13567. 3834.89   1
   0 -24  14 5796.93 2794.42   1
   0 -24 -14  14187. 5936.42   1
   0  24 -14  17199. 4600.96   1
   0  24 -14 8239.19 3155.73   1
   0  24  15  11521. 5232.10   1
   0 -24  15 7587.46 2664.07   1
   0 -24 -15 7212.43 4937.11   1
   0  24 -15 6636.17 2353.07   1
   0  24 -15 2602.33 2529.15   1
   0  24  16  16064. 5874.68   1
   0 -24  16  17892. 4861.65   1
   0 -24 -16  10725. 5227.53   1
   0  24 -16 8088.26 2796.70   1
   0  24 -16 5035.44 2798.99   1
   0  24  17 3715.98 4262.52   1
   0 -24  17 7038.64 2622.91   1
   0 -24 -17 3235.76 4445.46   1
   0  24 -17 5524.81 2334.78   1
   0  24  18 1654.93 3537.61   1
   0 -24  18  915.16 1776.35   1
   0 -24 -18 1111.14 4075.00   1
   0  24 -18   21.77 1731.99   1
   0  24  19 2362.22 3473.58   1
   0 -24  19 4900.52 2485.71   1
   0 -24 -19 2922.48 4068.14   1
   0  24 -19 5755.77 2460.55   1
   0  24  20 1277.84 3578.78   1
   0 -24  20 -489.14 1810.20   1
   0 -24 -20  597.30 4212.21   1
   0  24 -20 1017.15 1950.60   1
   0  24  21  439.51 4081.86   1
   0 -24  21 2410.24 2080.72   1
   0 -24 -21  535.33 4237.36   1
   0  24 -21 2122.80 2003.43   1
   0  24  22 1058.08 4509.49   1
   0 -24  22 4589.52 2343.93   1
   0 -24 -22 5056.02 5495.08   1
   0  24 -22 9663.84 3313.51   1
   0 -26   0  41413.  10364.   1
   0  26   0  38738. 9640.97   1
   0  26   1 1941.91 1931.85   1
   0 -26   1 1412.53 2043.22   1
   0 -26  -1 1601.87 2108.62   1
   0  26  -1 2577.18 1948.09   1
   0  26   2  17011. 4825.06   1
   0 -26   2  11518. 3686.25   1
   0 -26   2 8666.81 2419.39   1
   0 -26  -2  17850. 5120.05   1
   0  26  -2  12762. 3793.73   1
   0  26   3  584.72 2039.10   1
   0 -26   3 2911.04 2136.06   1
   0 -26   3 1494.17 1156.64   1
   0 -26  -3  643.04 2168.76   1
   0  26  -3  715.53 1719.87   1
   0  26  -3 1690.83 1147.72   1
   0  26   4 6999.76 3096.27   1
   0 -26   4 6364.05 2588.61   1
   0 -26   4 5385.31 1730.85   1
   0 -26  -4 5149.78 3011.66   1
   0  26  -4 5538.53 2318.77   1
   0  26  -4 6430.36 1896.87   1
   0  26   5  255.20 2636.63   1
   0 -26   5 2622.91 2113.88   1
   0 -26   5 2121.42 1198.95   1
   0 -26  -5 3866.91 3080.26   1
   0  26  -5 2467.41 1802.65   1
   0  26  -5  770.87 1079.81   1
   0  26   6 6032.47 3315.80   1
   0 -26   6 3446.14 2069.29   1
   0 -26   6 4841.07 1657.90   1
   0 -26  -6 5323.57 3446.14   1
   0  26  -6 2321.06 1710.95   1
   0  26  -6 5197.80 1716.21   1
   0  26   7 1095.13 2522.29   1
   0 -26   7 2012.80 1751.88   1
   0 -26   7  904.64 1182.02   1
   0 -26  -7    6.38 2924.76   1
   0  26  -7 1580.15 1650.12   1
   0  26  -7 1772.24 1305.05   1
   0  26   8 3725.13 2879.03   1
   0 -26   8 2419.39 1846.56   1
   0 -26   8 6023.32 1941.91   1
   0 -26  -8 2991.08 3597.07   1
   0  26  -8 3816.60 1884.97   1
   0  26  -8 1553.85 1370.68   1
   0  26   9 6883.14 3462.15  -1
   0 -26   9 3615.36 1864.85  -1
   0 -26   9 5851.81 2033.84  -1
   0 -26  -9  10480. 4578.09  -1
   0  26  -9 4827.35 2097.87  -1
   0  26  -9 5042.30 1870.34  -1
   0  26  10  17617. 5579.69   1
   0 -26  10  15365. 4221.35   1
   0 -26  10 6579.00 2369.08   1
   0 -26 -10  17629. 5787.78   1
   0  26 -10  13952. 3887.49   1
   0  26 -10 9131.02 2702.95   1
   0  26  11 5684.88 3398.12   1
   0 -26  11 6544.70 2359.93   1
   0 -26  11 5353.30 2199.17   1
   0 -26 -11 5908.98 3940.08   1
   0  26 -11 8858.90 2760.12   1
   0  26 -11 7212.43 2520.01   1
   0  26  12  15250. 5417.33   1
   0 -26  12 6178.82 2325.63   1
   0 -26  12 3807.45 2040.24   1
   0 -26 -12 7267.31 4148.18   1
   0  26 -12 8401.55 2707.52   1
   0  26 -12 3782.30 2185.91   1
   0  26  13 4550.65 3693.11   1
   0 -26  13 9261.37 3082.55   1
   0 -26  13 5572.83 2396.52   1
   0 -26 -13 6329.74 4319.68   1
   0  26 -13 9192.76 2922.48   1
   0  26 -13 8369.53 2869.88   1
   0  26  14  413.45 3350.10   1
   0 -26  14 5012.57 2293.62   1
   0 -26  14 -951.75 1869.42   1
   0 -26 -14 1329.29 3798.30   1
   0  26 -14 1161.67 1843.58   1
   0  26 -14 1048.25 2017.38   1
   0  26  15 1169.91 3434.71   1
   0 -26  15  525.50 1764.46   1
   0 -26  15  390.12 1848.61   1
   0 -26 -15 1235.31 3816.60   1
   0  26 -15 1400.41 1784.59   1
   0  26 -15  517.49 2086.90   1
   0  26  16 2262.06 3882.91   1
   0 -26  16 2118.22 2094.44   1
   0 -26 -16 1158.70 4141.32   1
   0  26 -16 2096.50 1869.88   1
   0  26 -16 1751.88 2300.48   1
   0  26  17 9563.22 5286.98   1
   0 -26  17  10988. 3526.18   1
   0 -26 -17 9227.07 5305.28   1
   0  26 -17  17254. 4797.62   1
   0  26 -17 1135.38 2234.85   1
   0  26  18 9105.87 5812.94   1
   0 -26  18  19584. 5378.45   1
   0 -26 -18  10528. 6544.70   1
   0  26 -18  19495. 5341.87   1
   0  26 -18 3404.98 2321.06   1
   0 -28   0 1842.44 2293.62   1
   0  28   0 1107.48 1950.38   1
   0  28   1 8522.75 3130.57   1
   0 -28   1 5986.73 2821.86   1
   0 -28  -1 5924.99 2915.62   1
   0  28  -1 7521.15 2876.74   1
   0  28   2 2240.79 2481.13   1
   0 -28   2 4578.09 2750.97   1
   0 -28   2 4468.32 1731.76   1
   0 -28  -2 1727.19 2350.79   1
   0  28  -2 6165.10 2609.19   1
   0  28   3 4898.23 2780.70   1
   0 -28   3 5646.00 2721.24   1
   0 -28   3 2622.91 1448.89   1
   0 -28  -3 4886.80 2856.16   1
   0  28  -3  10748. 3601.64   1
   0  28  -3 2264.12 1348.04   1
   0  28   4 6146.80 3270.06   1
   0 -28   4 5947.86 2782.98   1
   0 -28   4 4921.10 1707.52   1
   0 -28  -4 4026.98 3281.50   1
   0  28  -4 8536.47 3139.72   1
   0  28  -4 5609.42 1827.81   1
   0  28   5 2552.02 2959.06   1
   0 -28   5 2220.21 2197.35   1
   0 -28   5 2262.06 1224.33   1
   0 -28  -5 2222.27 3201.46   1
   0  28  -5 2175.39 1936.43   1
   0  28  -5 2574.89 1321.52   1
   0  28   6 1033.39 2815.00   1
   0 -28   6  707.29 1912.87   1
   0 -28   6 2053.05 1230.28   1
   0 -28  -6 -318.55 3222.04   1
   0  28  -6 1883.37 1900.30   1
   0  28  -6 1531.44 1193.23   1
   0  28   7 4616.96 3455.29  -1
   0 -28   7 6830.54 2803.56  -1
   0 -28   7 5117.76 1699.06  -1
   0 -28  -7 7411.38 4045.27  -1
   0  28  -7 4470.61 2246.28  -1
   0  28  -7 5220.67 1737.02  -1
   0  28   8 1632.52 2744.11   1
   0 -28   8 2693.80 1949.00   1
   0 -28   8 2394.24 1360.62   1
   0 -28  -8 1310.08 3487.31   1
   0  28  -8 1873.08 1948.77   1
   0  28  -8 5412.75 1884.75   1
   0  28   9  579.92 2661.79   1
   0 -28   9 2194.83 1932.08   1
   0 -28   9 3158.01 1571.69   1
   0 -28  -9 2158.01 3276.92   1
   0  28  -9 1886.80 1790.76   1
   0  28  -9 5387.60 1957.92   1
   0  28  10 1924.31 2716.67   1
   0 -28  10  186.51 1728.10   1
   0 -28  10 1508.12 1561.86   1
   0 -28 -10 2230.05 3281.50   1
   0  28 -10 2210.61 1925.68   1
   0  28 -10  281.27 1457.81   1
   0  28  11 2136.29 2796.70   1
   0 -28  11 3151.15 2074.55   1
   0 -28  11 2652.64 1855.93   1
   0 -28 -11  544.25 3407.27   1
   0  28 -11 2849.30 1930.71   1
   0  28 -11 5428.76 2128.51   1
   0  28  12 3613.08 3201.46   1
   0 -28  12 4891.37 2178.37   1
   0 -28  12  638.92 1843.58   1
   0 -28 -12  579.24 3258.63   1
   0  28 -12 1461.01 1830.78   1
   0  28 -12  415.73 1813.86   1
   1   1   0 299565.  70661.   1
   1   1   0 323576.  75875.   1
  -1  -1   0 274868.  64761.   1
  -1  -1   0 280356.  65744.   1
   1  -1   0 268694.  63069.   1
   1  -1   0 270295.  63389.   1
  -1   1   0 237137.  55660.   1
   1  -1   1 392865.  92248.  -1
  -1   1   1 -205.44 442.945  -1
  -1   1  -1    8.52 440.887  -1
   1  -1   2 461696. 108392.   1
   1  -1   2 514520. 120626.   1
  -1   1   2 541276. 127029.   1
  -1  -1  -2 410930.  96341.   1
   1   1   2 482277. 113057.   1
   1  -1  -2 592956. 139126.   1
  -1   1  -2 434941. 102127.   1
   1  -1   3 433341. 101784.   1
   1  -1   3 388063.  91013.   1
  -1  -1  -3 541962. 127029.   1
   1   1   3 435856. 102172.   1
   1  -1  -3 387605.  90990.   1
  -1   1  -3 527784. 123919.   1
   1  -1   4  24834. 6112.50   1
   1  -1   4  36588. 8730.84   1
  -1  -1  -4  44843.  10656.   1
   1   1   4  47565.  11299.   1
  -1   1  -4  30665. 7445.68   1
  -1   1  -4  41207. 9773.60   1
   1  -1   5 228378.  53624.   1
  -1  -1  -5 172742.  40613.   1
   1   1   5 189069.  44432.   1
  -1   1  -5 178687.  41985.   1
   1  -1   6 439515. 103110.   1
  -1  -1  -6 450949. 105808.   1
   1   1   6 521838. 122433.   1
  -1   1  -6 414132.  97141.   1
   1  -1   7  21980. 5847.24   1
  -1  -1  -7  22705. 5947.86   1
   1   1   7  23211. 6233.70   1
  -1   1  -7  25657. 6510.40   1
   1  -1   8 167048.  39492.   1
  -1  -1  -8 115527.  27441.   1
   1   1   8 130894.  31100.   1
  -1   1  -8 162611.  38463.   1
   1  -1   9  31054. 8156.86   1
  -1  -1  -9  17603. 5122.34   1
   1   1   9  18095. 5293.84   1
  -1   1  -9  24262. 6528.69   1
   1  -1  10 276469.  65150.   1
  -1  -1 -10 188612.  44523.   1
   1   1  10 248799.  58678.   1
  -1   1 -10 290647.  68443.   1
   1  -1  11 3162.59 3235.76  -1
  -1  -1 -11 3590.21 2246.28  -1
   1   1  11 3558.19 3270.06  -1
  -1   1 -11 2837.87 2890.46  -1
   1  -1  12  68054.  16584.   1
  -1   1 -12  59890.  14738.   1
   1  -1  13  26343. 6942.60   1
  -1   1 -13  14633. 4996.56   1
   1   3   0  46764.  11036.   1
   1   3   0  55820.  13197.   1
  -1  -3   0  84839.  19961.   1
   1  -3   0  52001.  12339.   1
   1  -3   0  69495.  16398.   1
  -1   3   0  69632.  16430.   1
  -1   3   0  47862.  11363.   1
   1  -3   1 267779.  62909.   1
   1  -3   1 220718.  51818.   1
  -1   3   1 260233.  61102.   1
  -1   3   1 250629.  58815.   1
   1   3  -1 278756.  65470.   1
   1   3  -1 304825.  71507.   1
  -1  -3  -1 254287.  59662.   1
   1   3   1 253144.  59387.   1
  -1  -3   1 247198.  58061.   1
  -1  -3   1 278984.  65447.   1
   1  -3  -1 291333.  68420.   1
   1  -3  -1 218202.  51223.   1
  -1   3  -1 233707.  54882.   1
  -1   3  -1 273039.  64029.   1
   1  -3   2 403613.  94786.   1
   1  -3   2 611708. 143380.   1
  -1   3   2 523896. 122982.   1
   1   3  -2 485479. 113835.   1
   1   3  -2 561856. 131923.   1
  -1  -3  -2 550880. 129133.   1
   1   3   2 509032. 119346.   1
  -1  -3   2 509718. 119666.   1
   1  -3  -2 580836. 136336.   1
  -1   3  -2 448204. 105168.   1
  -1   3  -2 691973. 162154.   1
   1  -3   3 461010. 108095.   1
  -1   3   3 535787. 125749.   1
   1   3  -3 442488. 103933.   1
  -1  -3  -3 486622. 114109.   1
   1   3   3 566887. 132906.   1
  -1  -3   3 482048. 113172.   1
   1  -3  -3 540818. 126984.   1
  -1   3  -3 507431. 119117.   1
  -1   3  -3 667962. 156574.   1
   1  -3   4 516578. 121290.   1
   1  -3   4 493025. 115573.   1
  -1   3   4 468099. 109924.   1
  -1  -3  -4 514520. 120649.   1
   1   3   4 463754. 108758.   1
   1  -3  -4 542190. 127327.   1
  -1   3  -4 413903.  97210.   1
  -1   3  -4 475188. 111411.   1
   1  -3   5 205511.  48411.   1
   1  -3   5 174182.  40933.   1
  -1  -3  -5 201555.  47404.   1
   1   3   5 247198.  58084.   1
   1  -3  -5 179648.  42282.   1
  -1   3  -5 256346.  60302.   1
  -1   3  -5 233021.  54722.   1
   1  -3   6 131100.  30986.   1
   1  -3   6 141962.  33432.   1
  -1  -3  -6 165150.  38966.   1
   1   3   6 128859.  30505.   1
  -1   3  -6  71553.  17034.   1
  -1   3  -6 126298.  29751.   1
   1  -3   7  97302.  23073.  -1
   1  -3   7 130551.  30825.  -1
  -1  -3  -7  84702.  20252.  -1
   1   3   7 101829.  24285.  -1
  -1   3  -7  98170.  23279.  -1
  -1   3  -7 120489.  28470.  -1
   1  -3   8 306197.  72056.   1
   1  -3   8 385547.  90578.   1
  -1  -3  -8 293848.  69174.   1
   1   3   8 272353.  64144.   1
  -1   3  -8 301166.  70821.   1
  -1   3  -8 359936.  84564.   1
   1  -3   9 218500.  51521.   1
  -1  -3  -9 135376.  32106.   1
   1   3   9 141299.  33524.   1
  -1   3  -9 219346.  51726.   1
   1  -3  10 167757.  39698.   1
  -1  -3 -10 124514.  29614.   1
   1   3  10 108507.  25932.   1
  -1   3 -10 136680.  32449.   1
   1  -3  11 285387.  67254.   1
  -1   3 -11 269609.  63549.   1
   1  -3  12  24194. 6691.05   1
  -1   3 -12  22792. 6489.82   1
   1  -3  13  16314. 5069.74   1
  -1   3 -13  23371. 6512.69   1
   1  -3  14  30117. 7957.92   1
  -1   3 -14  24583. 6757.37   1
   1   5   0 373656.  87766.  -1
   1   5   0 409101.  95907.  -1
  -1  -5   0 369769.  86805.  -1
  -1  -5   0 395609.  92751.  -1
   1  -5   0 376858.  88498.  -1
   1  -5   0 467185. 109536.  -1
  -1   5   0 327006.  76812.  -1
  -1   5   0 433798. 101715.  -1
   1  -5   1 597072. 140132.   1
   1  -5   1 999999. 234393.   1
  -1   5   1 671163. 157512.   1
  -1   5   1 886576. 207798.   1
   1   5  -1 808369. 189458.   1
   1   5  -1 600960. 141047.   1
  -1  -5  -1 654470. 153624.   1
  -1  -5  -1 898696. 210588.   1
   1   5   1 777955. 182300.   1
  -1  -5   1 627258. 147221.   1
   1  -5  -1 663617. 155797.   1
  -1   5  -1 667047. 156574.   1
  -1   5  -1 996340. 233478.   1
   1  -5   2 265264.  62223.   1
  -1   5   2 223439.  52527.   1
   1   5  -2 246284.  57855.   1
   1   5  -2 228310.  53556.   1
  -1  -5  -2 327921.  76927.   1
  -1  -5  -2 211411.  49691.   1
   1   5   2 294306.  69060.   1
   1   5   2 191745.  45095.   1
  -1  -5   2 228904.  53739.   1
  -1  -5   2 229590.  53876.   1
   1  -5  -2 251543.  59136.   1
  -1   5  -2 268008.  62954.   1
  -1   5  -2 287217.  67391.   1
   1  -5   3 509032. 119529.   1
   1  -5   3 734506. 172170.   1
  -1   5   3 592728. 139172.   1
   1   5  -3 524125. 123050.   1
  -1  -5  -3 656757. 153922.   1
  -1  -5  -3 343700.  80723.   1
   1   5   3 622684. 145941.   1
  -1  -5   3 543334. 127578.   1
   1  -5  -3 550651. 129248.   1
  -1   5  -3 498970. 117105.   1
  -1   5  -3 652412. 152938.   1
   1  -5   4 378687.  88955.   1
   1  -5   4 301395.  70684.   1
  -1   5   4 427624. 100412.   1
   1   5  -4 393094.  92271.   1
  -1  -5  -4 523439. 122730.   1
   1   5   4 479076. 112394.   1
  -1  -5   4 353533.  83009.   1
   1  -5  -4 416419.  97805.   1
  -1   5  -4 269609.  63275.   1
   1  -5   5 277612.  65287.   1
   1  -5   5 348502.  81752.   1
  -1   5   5 277155.  65150.   1
   1   5  -5 372970.  87651.   1
  -1  -5  -5 391036.  91813.   1
   1   5   5 430825. 101166.   1
  -1  -5   5 383718.  90144.   1
   1  -5  -5 326549.  76744.   1
  -1   5  -5 376629.  88498.   1
  -1   5  -5 323348.  75852.   1
   1  -5   6 332723.  78230.   1
   1  -5   6 359936.  84427.   1
  -1   5   6 392636.  92225.   1
   1   5  -6 292934.  68900.   1
  -1  -5  -6 452549. 106288.   1
   1   5   6 326092.  76675.   1
  -1  -5   6 324948.  76401.   1
   1  -5  -6 374342.  87926.   1
  -1   5  -6 450263. 105763.   1
  -1   5  -6 385090.  90350.   1
   1  -5   7  69357.  16552.   1
   1  -5   7  41916.  10078.   1
   1   5  -7  48251.  11560.   1
  -1  -5  -7  38120. 9485.47   1
   1   5   7  36977. 9336.83   1
  -1  -5   7  43837.  10549.   1
  -1   5  -7  76423.  18193.   1
  -1   5  -7  42488.  10206.   1
   1  -5   8 242396.  57100.   1
   1  -5   8 241482.  56826.   1
   1   5  -8 178550.  42053.   1
  -1  -5  -8 177292.  41848.   1
   1   5   8 149874.  35513.   1
  -1   5  -8 344386.  81020.   1
  -1   5  -8 217745.  51223.   1
   1  -5   9 103041.  24468.   1
   1  -5   9  89549.  21358.   1
  -1  -5  -9  51978.  12758.   1
   1   5   9  45575.  11365.   1
  -1   5  -9 118477.  28059.   1
  -1   5  -9  73245.  17571.   1
   1  -5  10 124743.  29545.   1
   1  -5  10 193665.  45758.   1
  -1   5 -10 127258.  30139.   1
  -1   5 -10 171049.  40430.   1
   1  -5  11  95998.  22822.  -1
   1  -5  11  91813.  22044.  -1
  -1   5 -11 122227.  28973.  -1
  -1   5 -11  77795.  18790.  -1
   1  -5  12 116122.  27533.   1
   1  -5  12 127807.  30437.   1
  -1   5 -12 112097.  26618.   1
  -1   5 -12 146810.  34850.   1
   1  -5  13  15225. 4708.43  -1
  -1   5 -13  18605. 4918.82  -1
  -1   5 -13  12929. 4294.53  -1
   1  -5  14 4873.08 2938.48   1
  -1   5 -14 8751.42 3743.42   1
   1  -5  15  44066.  10983.   1
  -1   5 -15  35971. 9220.21   1
  -1   5 -16  24171. 6565.28   1
   1   7   0  48136.  11448.   1
   1   7   0  56506.  13332.   1
  -1  -7   0  52527.  12399.   1
  -1  -7   0  49851.  11857.   1
   1  -7   0  56963.  13574.   1
   1  -7   0  41116. 9817.05   1
  -1   7   0  40727. 9775.89   1
  -1   7   0  44340.  10572.   1
   1  -7   1 519323. 121953.   1
   1  -7   1 672078. 157558.   1
  -1   7   1 687399. 161148.   1
  -1   7   1 623827. 146421.   1
   1   7  -1 520237. 122113.   1
   1   7  -1 628630. 147359.   1
  -1  -7  -1 524811. 123028.   1
  -1  -7  -1 563228. 132266.   1
   1   7   1 485936. 114086.   1
   1   7   1 605305. 141870.   1
  -1  -7   1 513606. 120581.   1
  -1  -7   1 633889. 148594.   1
   1  -7  -1 539446. 126641.   1
   1  -7  -1 562085. 131809.   1
  -1   7  -1 546992. 128447.   1
  -1   7  -1 697690. 163549.   1
   1  -7   2 229590.  53990.   1
   1  -7   2 165012.  38783.   1
  -1   7   2 226069.  53190.   1
   1   7  -2 255202.  59982.   1
   1   7  -2 213240.  50034.   1
  -1  -7  -2 229362.  53830.   1
  -1  -7  -2 233021.  54791.   1
   1   7   2 249943.  58770.   1
   1   7   2 246284.  57786.   1
  -1  -7   2 228287.  53647.   1
  -1  -7   2 211296.  49577.   1
   1  -7  -2 324034.  76149.   1
  -1   7  -2 280814.  66019.   1
  -1   7  -2 285845.  67071.   1
   1  -7   3 183398.  43174.   1
   1  -7   3 225657.  52984.   1
  -1   7   3 235765.  55477.   1
   1   7  -3 200480.  47130.   1
  -1  -7  -3 238737.  56140.   1
  -1  -7  -3 229590.  53876.   1
   1   7   3 204002.  47976.   1
   1   7   3 241482.  56712.   1
  -1  -7   3 217036.  51018.   1
   1  -7  -3 245826.  57809.   1
  -1   7  -3 213377.  50194.   1
  -1   7  -3 214498.  50354.   1
   1  -7   4  54859.  13062.  -1
   1  -7   4  89366.  21091.  -1
  -1   7   4  84930.  20107.  -1
   1   7  -4  78367.  18509.  -1
  -1  -7  -4 122296.  28859.  -1
  -1  -7  -4  66453.  15875.  -1
   1   7   4  75440.  17871.  -1
   1   7   4  82186.  19575.  -1
  -1  -7   4  80928.  19120.  -1
   1  -7  -4  94580.  22371.  -1
  -1   7  -4  78596.  18614.  -1
  -1   7  -4  86348.  20380.  -1
   1  -7   5 135925.  32060.   1
   1  -7   5 101601.  23965.   1
  -1   7   5  93414.  22122.   1
   1   7  -5 132883.  31306.   1
  -1  -7  -5 167894.  39561.   1
  -1  -7  -5 116419.  27578.   1
   1   7   5 112646.  26755.   1
  -1  -7   5 101601.  23988.   1
   1  -7  -5  93391.  22129.   1
  -1   7  -5 100755.  23828.   1
  -1   7  -5  92202.  21756.   1
   1  -7   6 294763.  69289.   1
   1  -7   6 271667.  63755.   1
  -1   7   6 310313.  72970.   1
   1   7  -6 289732.  68100.   1
  -1  -7  -6 348730.  81957.   1
   1   7   6 311685.  73336.   1
  -1  -7   6 289046.  67894.   1
   1  -7  -6 381431.  89687.   1
  -1   7  -6 313972.  73817.   1
  -1   7  -6 261834.  61468.   1
   1  -7   7 201143.  47359.   1
   1  -7   7 137754.  32449.   1
  -1   7   7 149051.  35193.   1
   1   7  -7 160073.  37732.   1
  -1  -7  -7  94855.  22609.   1
   1   7   7  90921.  21756.   1
  -1  -7   7 217859.  51292.   1
   1  -7  -7 192545.  45415.   1
  -1   7  -7 190190.  44798.   1
  -1   7  -7  85136.  20139.   1
   1  -7   8 180196.  42488.   1
   1  -7   8 175692.  41390.   1
  -1   7   8 139789.  33044.   1
   1   7  -8 174480.  41139.   1
  -1  -7  -8  95747.  22836.   1
  -1  -7   8 179853.  42396.   1
   1  -7  -8 102584.  24331.   1
  -1   7  -8 131740.  31123.   1
  -1   7  -8 174731.  41139.   1
   1  -7   9  96524.  22913.   1
   1  -7   9  95655.  22769.   1
   1   7  -9 191745.  45209.   1
  -1  -7   9  86737.  20606.   1
  -1   7  -9  98925.  23462.   1
  -1   7  -9 124148.  29408.   1
   1  -7  10  87903.  20956.   1
   1  -7  10 119392.  28402.   1
   1   7 -10 104596.  24811.   1
  -1  -7  10 107455.  25452.   1
  -1   7 -10 178390.  42122.   1
  -1   7 -10 142648.  33798.   1
   1  -7  11 306197.  72101.   1
   1  -7  11 218157.  51498.   1
   1   7 -11 195129.  46032.   1
  -1  -7  11 170729.  40293.   1
  -1   7 -11 181820.  42968.   1
  -1   7 -11 251315.  59250.   1
   1  -7  12 266865.  62909.   1
   1  -7  12 284701.  67048.   1
   1   7 -12 295449.  69563.   1
  -1  -7  12 278298.  65538.   1
  -1   7 -12 292476.  68900.   1
  -1   7 -12 320603.  75486.   1
   1  -7  13 129636.  30757.   1
   1  -7  13 125840.  29979.   1
  -1   7 -13 154013.  36451.   1
  -1   7 -13 134713.  32060.   1
   1  -7  14 7004.34 2613.76   1
   1  -7  14 6983.76 3384.40   1
  -1   7 -14 6249.71 2618.34   1
  -1   7 -14 5435.62 3206.03   1
   1  -7  15 170981.  40453.   1
   1  -7  15 134804.  32037.   1
  -1   7 -15 200137.  47290.   1
  -1   7 -15 124514.  29614.   1
   1  -7  16  32380. 8106.56   1
   1  -7  16  30437. 8067.68   1
  -1   7 -16  36039. 8975.52   1
  -1   7 -16  31123. 8227.75   1
  -1   7 -17  18038. 4948.54   1
  -1   7 -17  11480. 4337.98   1
   1   9   0 163343.  38463.   1
   1   9   0 184953.  43403.   1
  -1  -9   0 178184.  41939.   1
  -1  -9   0 184839.  43380.   1
   1  -9   0 238051.  55888.   1
   1  -9   0 246284.  57969.   1
  -1   9   0 183421.  43197.   1
  -1   9   0 194397.  45689.   1
   1  -9   1 125177.  29545.   1
   1  -9   1  97347.  22959.   1
  -1   9   1 101715.  24057.   1
  -1   9   1  85159.  20105.   1
   1   9  -1 108964.  25703.   1
   1   9  -1  96364.  22655.   1
  -1  -9  -1 164418.  38715.   1
  -1  -9  -1  85936.  20222.   1
   1   9   1  72948.  17180.   1
   1   9   1 112371.  26526.   1
  -1  -9   1 102790.  24262.   1
  -1  -9   1  96661.  22721.   1
   1  -9  -1 119620.  28241.   1
   1  -9  -1  86394.  20409.   1
  -1   9  -1 117036.  27624.   1
  -1   9  -1 106197.  25017.   1
   1  -9   2 271895.  63938.   1
   1  -9   2 465355. 109147.   1
  -1   9   2 367939.  86485.   1
   1   9  -2 388749.  91173.   1
   1   9  -2 373885.  87834.   1
  -1  -9  -2 429224. 100640.   1
  -1  -9  -2 340956.  80128.   1
   1   9   2 292248.  68694.   1
   1   9   2 536016. 125703.   1
  -1  -9   2 393780.  92476.   1
  -1  -9   2 433341. 101578.   1
   1  -9  -2 372970.  87674.   1
  -1   9  -2 338669.  79579.   1
   1  -9   3  81592.  19330.   1
   1  -9   3  53807.  12788.   1
  -1   9   3  68969.  16401.   1
   1   9  -3  84793.  20034.   1
  -1  -9  -3  77681.  18459.   1
  -1  -9  -3  81431.  19300.   1
   1   9   3  83009.  19662.   1
   1   9   3  83215.  19785.   1
  -1  -9   3  95083.  22440.   1
   1  -9  -3  82506.  19563.   1
  -1   9  -3  85159.  20160.   1
  -1   9  -3  64921.  15367.   1
   1  -9   4  27853. 6782.52   1
   1  -9   4  29682. 7171.27   1
   1   9  -4  29774. 7157.55   1
  -1  -9  -4  52778.  12678.   1
  -1  -9  -4  22643. 5979.87   1
   1   9   4  32975. 8031.09   1
  -1  -9   4  25657. 6185.68   1
  -1   9  -4  40293. 9659.26   1
  -1   9  -4  14361. 3640.52   1
   1  -9   5  51635.  12310.   1
   1  -9   5  86943.  20537.   1
  -1   9   5  46787.  11226.   1
  -1  -9  -5  56712.  13615.   1
  -1  -9  -5  48616.  11875.   1
   1   9   5  65927.  15726.   1
   1   9   5  50880.  12449.   1
  -1  -9   5  89572.  21153.   1
   1  -9  -5  67779.  16135.   1
  -1   9  -5  43311.  10373.   1
  -1   9  -5  69152.  16380.   1
   1  -9   6  64052.  15237.   1
   1  -9   6  65310.  15497.   1
  -1   9   6  55042.  13206.   1
   1   9  -6  90441.  21379.   1
  -1  -9  -6  63206.  15250.   1
  -1  -9  -6  50377.  12131.   1
   1   9   6  53967.  12929.   1
   1   9   6  56254.  13650.   1
  -1  -9   6  55042.  13087.   1
   1  -9  -6  58907.  14112.   1
  -1   9  -6  75006.  17793.   1
  -1   9  -6 108598.  25612.   1
   1  -9   7  62474.  14882.   1
   1  -9   7  39881. 9595.23   1
  -1   9   7  39538. 9654.69   1
   1   9  -7  40727. 9769.03   1
  -1  -9   7  52252.  12442.   1
   1  -9  -7  31191. 7745.25   1
  -1   9  -7  47336.  11342.   1
  -1   9  -7  35833. 8659.95   1
   1  -9   8  14002. 3695.40   1
  -1   9   8  28836. 7191.85   1
   1   9  -8  19783. 4971.41   1
   1  -9  -8  28196. 7104.96   1
  -1   9  -8  12342. 3313.51   1
   1  -9   9  47587.  11443.   1
   1  -9   9  35147. 8680.53   1
  -1   9   9  33478. 8268.92   1
   1   9  -9  40270. 9730.15   1
  -1  -9   9  26938. 6645.32   1
   1  -9  -9  35170. 8721.69   1
  -1   9  -9  61125.  14603.   1
  -1   9  -9  55500.  13323.   1
   1  -9  10 117745.  27990.   1
  -1   9  10 156711.  37045.   1
   1   9 -10 116122.  27510.   1
  -1  -9  10 134141.  31740.   1
   1  -9 -10 107958.  25657.   1
  -1   9 -10  89664.  21301.   1
  -1   9 -10 139012.  32884.   1
   1  -9  11 107752.  25566.   1
   1  -9  11 117905.  28059.   1
   1   9 -11  76332.  18232.   1
  -1  -9  11 114910.  27258.   1
   1  -9 -11 104505.  24857.   1
  -1   9 -11 113080.  26801.   1
  -1   9 -11 123919.  29408.   1
   1  -9  12 271438.  63983.   1
   1  -9  12 219735.  51864.   1
  -1  -9  12 204276.  48182.   1
  -1   9 -12 258632.  60919.   1
  -1   9 -12 226023.  53304.   1
   1  -9  13 216213.  51040.   1
   1   9 -13 161765.  38257.   1
  -1  -9  13 158312.  37411.   1
  -1   9 -13 164349.  38898.   1
   1  -9  14  78138.  18781.   1
   1  -9  14  41710.  10519.   1
   1   9 -14  43631.  10668.   1
  -1  -9  14  47039.  11411.   1
  -1   9 -14  54974.  13396.   1
  -1   9 -14  50606.  12527.   1
   1  -9  15 9965.69 3935.51   1
   1   9 -15  13311. 3885.20   1
  -1  -9  15  20011. 5259.54   1
  -1   9 -15  19053. 5597.98   1
   1  -9  16  61125.  14802.  -1
   1  -9  16  29133. 7747.53  -1
   1   9 -16  43769.  10709.  -1
  -1  -9  16  30825. 7665.21  -1
  -1   9 -16  50103.  12271.  -1
  -1   9 -16  41962.  10604.  -1
   1  -9  17  52641.  12728.   1
   1  -9  17  36725. 9320.82   1
  -1   9 -17  60233.  14505.   1
  -1   9 -17  30002. 7784.12   1
   1  -9  18 120489.  28562.   1
   1  -9  18  81500.  19577.   1
  -1   9 -18  85685.  20460.   1
  -1   9 -18  75143.  18104.   1
  -1   9 -19  10247. 3441.57   1
  -1   9 -21 -432.65 1232.79   1
   1  11   0 163732.  38578.  -1
   1  11   0 235536.  55248.  -1
  -1 -11   0 198925.  46833.  -1
  -1 -11   0 194146.  45552.  -1
   1 -11   0 254287.  59707.  -1
   1 -11   0 212348.  50011.  -1
  -1  11   0 240567.  56597.  -1
  -1  11   0 229133.  53807.  -1
   1 -11   1 174594.  41139.   1
   1 -11   1 176766.  41573.   1
  -1  11   1 169609.  39973.   1
   1  11  -1 158861.  37297.   1
   1  11  -1 181980.  42831.   1
  -1 -11  -1 157420.  36977.   1
  -1 -11  -1 144752.  34141.   1
   1  11   1 202698.  47587.   1
   1  11   1 245140.  57672.   1
  -1 -11   1 206151.  48365.   1
  -1 -11   1 162771.  38349.   1
   1 -11  -1 154493.  36451.   1
   1 -11  -1 153830.  36199.   1
  -1  11  -1 306197.  71987.   1
  -1  11  -1 185662.  43631.   1
   1 -11   2 139103.  32838.   1
   1 -11   2 134050.  31557.   1
  -1  11   2 139675.  32975.   1
   1  11  -2 154676.  36451.   1
   1  11  -2 164624.  38646.   1
  -1 -11  -2 154974.  36474.   1
  -1 -11  -2 161331.  38029.   1
   1  11   2 170661.  40178.   1
   1  11   2 167459.  39447.   1
  -1 -11   2 141619.  33387.   1
  -1 -11   2 138692.  32563.   1
   1 -11  -2 144546.  34118.   1
  -1  11  -2 153053.  36085.   1
  -1  11  -2 153419.  36085.   1
   1 -11   3 189389.  44615.   1
   1 -11   3 118408.  27876.   1
  -1  11   3 123348.  29156.   1
   1  11  -3 119803.  28264.   1
  -1 -11  -3 199360.  46924.   1
  -1 -11  -3 165630.  39035.   1
   1  11   3 166636.  39241.   1
   1  11   3 176949.  41710.   1
  -1 -11   3 129293.  30482.   1
   1 -11  -3 139424.  32929.   1
  -1  11  -3 147267.  34736.   1
  -1  11  -3 140681.  33089.   1
   1 -11   4 118683.  28036.   1
   1 -11   4 115847.  27281.   1
  -1  11   4 115275.  27258.   1
   1  11  -4  88635.  20956.   1
  -1 -11  -4 104596.  24743.   1
  -1 -11  -4  98536.  23394.   1
   1  11   4 100000.  23668.   1
   1  11   4  94946.  22559.   1
  -1 -11   4 111983.  26412.   1
   1 -11  -4 112028.  26504.   1
  -1  11  -4  97279.  23005.   1
  -1  11  -4 119071.  28036.   1
   1 -11   5  55614.  13277.   1
   1 -11   5  47770.  11399.   1
  -1  11   5  62474.  14894.   1
   1  11  -5  67962.  16115.   1
  -1 -11  -5 112326.  26641.   1
  -1 -11  -5  32792. 8166.01   1
   1  11   5  78276.  18614.   1
   1  11   5  27029. 6812.25   1
  -1 -11   5  60393.  14331.   1
   1 -11  -5  65721.  15669.   1
  -1  11  -5  47016.  11239.   1
  -1  11  -5  51658.  12289.   1
   1 -11   6 233707.  55019.   1
   1 -11   6 195198.  45872.   1
  -1  11   6 256803.  60462.   1
   1  11  -6 211205.  49691.   1
  -1 -11  -6 225863.  53259.   1
   1  11   6 212760.  50126.   1
  -1 -11   6 264806.  62268.   1
   1 -11  -6 273725.  64418.   1
  -1  11  -6 228310.  53716.   1
  -1  11  -6 199703.  46924.   1
   1 -11   7  83695.  19863.   1
   1 -11   7 107455.  25360.   1
  -1  11   7 102973.  24423.   1
   1  11  -7 129796.  30620.   1
  -1 -11  -7 118934.  28219.   1
   1  11   7  89298.  21233.   1
  -1 -11   7 103682.  24491.   1
   1 -11  -7 118546.  28104.   1
  -1  11  -7 102104.  24148.   1
  -1  11  -7 123142.  29019.   1
   1 -11   8 127853.  30208.   1
   1 -11   8  64235.  15301.   1
  -1  11   8 100686.  23942.   1
   1  11  -8  80174.  19003.   1
  -1 -11  -8  71644.  17162.   1
   1  11   8 107455.  25474.   1
  -1 -11   8  84816.  20082.   1
   1 -11  -8  68214.  16403.   1
  -1  11  -8 106014.  25040.   1
   1 -11   9  24171. 6016.46   1
   1 -11   9  31489. 7809.28   1
  -1  11   9  17896. 4799.90   1
   1  11  -9  41688.  10027.   1
  -1 -11   9  24262. 5959.29   1
   1 -11  -9  17665. 4868.51   1
  -1  11  -9  35696. 8646.23   1
  -1  11  -9  29659. 7329.06   1
   1 -11  10 183970.  43380.  -1
   1 -11  10 141688.  33524.  -1
  -1  11  10 145255.  34416.  -1
   1  11 -10 195929.  46147.  -1
  -1 -11  10 152824.  36039.  -1
   1 -11 -10 151086.  35833.  -1
  -1  11 -10 202218.  47633.  -1
  -1  11 -10 153922.  36314.  -1
   1 -11  11 184861.  43608.   1
   1 -11  11 259090.  61034.   1
  -1  11  11 220992.  52161.   1
   1  11 -11 252458.  59433.   1
  -1 -11  11 244683.  57603.   1
   1 -11 -11 232792.  54951.   1
  -1  11 -11 224994.  53007.   1
  -1  11 -11 246741.  58084.   1
   1 -11  12  37091. 9069.28  -1
   1 -11  12  32266. 8332.94  -1
  -1  11  12  67505.  16266.  -1
   1  11 -12  48045.  11630.  -1
  -1 -11  12  42762.  10393.  -1
   1 -11 -12  50766.  12447.  -1
  -1  11 -12  38372. 9620.39  -1
   1 -11  13 143403.  33935.   1
   1 -11  13 118568.  28264.   1
   1  11 -13 147793.  35010.   1
  -1 -11  13 127418.  30208.   1
   1 -11 -13  92705.  22218.   1
  -1  11 -13 132060.  31374.   1
   1 -11  14  24148. 6181.10  -1
   1 -11  14  23119. 6505.83  -1
   1  11 -14  41299.  10165.  -1
  -1 -11  14  25863. 6562.99  -1
  -1  11 -14  26641. 7159.84  -1
   1 -11  15  49302.  11930.   1
   1 -11  15  29110. 7635.48   1
  -1 -11  15  53167.  12799.   1
  -1  11 -15  38257. 9634.11   1
   1 -11  16  52321.  12641.   1
   1 -11  16  39149. 9855.92   1
   1  11 -16  48525.  11765.   1
  -1 -11  16  64990.  15568.   1
  -1  11 -16  41482.  10327.   1
   1 -11  17  16231. 4351.70   1
   1 -11  17 7297.04 3192.31   1
   1  11 -17 5597.98 2174.25   1
  -1 -11  17 6809.96 2359.93   1
  -1  11 -17 6169.67 3018.52   1
   1 -11  18  50835.  12278.   1
   1 -11  18  38966. 9741.59   1
   1  11 -18  63252.  15166.   1
  -1 -11  18  59090.  14166.   1
  -1  11 -18  43654.  10823.   1
   1 -11  19 3297.50 1730.62   1
   1 -11  19  947.63 2634.34   1
   1  11 -19 1081.18 1376.63   1
  -1 -11  19 2890.46 1571.46   1
  -1  11 -19 -340.27 1252.23   1
  -1  11 -19 3366.11 2734.96   1
   1 -11  20 5049.16 1975.76   1
  -1 -11  20 2869.88 1494.40   1
  -1  11 -20   13.46 1241.02   1
  -1  11 -20 1999.08 2696.09   1
   1 -11  21  56300.  13595.  -1
   1  11 -21  49097.  11893.  -1
   1 -11  22 3235.76 1853.42   1
  -1  11 -22 -810.88 1663.39   1
   1 -11  24  18358. 4886.80   1
  -1  11 -24 6601.87 2455.98   1
  -1  11 -25 7754.39 2849.30   1
  -1  11 -26  16526. 4614.68   1
   1  13   0 203133.  47862.   1
   1  13   0 214887.  50423.   1
  -1 -13   0 230505.  54288.   1
  -1 -13   0 209124.  49074.   1
   1 -13   0 207729.  48982.   1
   1 -13   0 144477.  34027.   1
  -1  13   0 213743.  50332.   1
  -1  13   0 182758.  42968.   1
   1 -13   1  12136. 3352.39  -1
   1 -13   1  12808. 3471.30  -1
  -1  13   1 7159.84 2211.29  -1
   1  13  -1  14603. 3535.33  -1
   1  13  -1 7164.41 2256.34  -1
  -1 -13  -1  16600. 4111.59  -1
  -1 -13  -1 7806.99 2380.51  -1
   1  13   1  20967. 5259.54  -1
   1  13   1 9922.24 2819.57  -1
  -1 -13   1  12019. 3238.05  -1
  -1 -13   1  15173. 3647.38  -1
   1 -13  -1 8367.25 2568.03  -1
   1 -13  -1  26732. 6627.02  -1
  -1  13  -1  14253. 3725.13  -1
  -1  13  -1  15099. 3919.50  -1
   1 -13   2 138600.  32769.   1
   1 -13   2 134141.  31603.   1
  -1  13   2 116808.  27647.   1
   1  13  -2 123576.  29202.   1
   1  13  -2 155042.  36405.   1
  -1 -13  -2 155980.  36725.   1
  -1 -13  -2 125497.  29682.   1
   1  13   2 126138.  29819.   1
   1  13   2 110748.  26183.   1
  -1 -13   2 122936.  29042.   1
  -1 -13   2 134164.  31512.   1
   1 -13  -2 155865.  36817.   1
  -1  13  -2 124422.  29408.   1
  -1  13  -2 105054.  24788.   1
   1 -13   3 111731.  26458.   1
  -1  13   3 171004.  40361.   1
   1  13  -3  98125.  23233.   1
  -1 -13  -3 101120.  23965.   1
  -1 -13  -3  88406.  20954.   1
   1  13   3 111662.  26412.   1
   1  13   3  83101.  19746.   1
  -1 -13   3 100960.  23874.   1
  -1  13  -3  69403.  16508.   1
  -1  13  -3  87354.  20617.   1
   1 -13   4 6606.44 2043.22   1
   1 -13   4  29545. 7164.41   1
  -1  13   4 7576.03 2369.08   1
   1  13  -4 6005.03 1903.73   1
  -1 -13  -4  17994. 4594.10   1
   1  13   4  10126. 2815.00   1
  -1 -13   4  11765. 3071.12   1
   1 -13  -4 5415.04 2128.74   1
  -1  13  -4  45758.  10908.   1
   1 -13   5  29248. 7159.84   1
   1 -13   5  23668. 5822.08   1
  -1  13   5  17775. 4594.10   1
   1  13  -5  19003. 4756.46   1
  -1 -13  -5  17002. 4408.87   1
   1  13   5  21644. 5451.63   1
  -1 -13   5  23371. 5700.89   1
   1 -13  -5  23371. 5913.56   1
  -1  13  -5  20073. 4980.56   1
   1 -13   6  57924.  13839.   1
   1 -13   6  49783.  11909.   1
  -1  13   6  86851.  20661.   1
   1  13  -6  49691.  11877.   1
  -1 -13  -6  63275.  15198.   1
   1  13   6  65699.  15749.   1
  -1 -13   6  50720.  12076.   1
   1 -13  -6  32678. 8044.81   1
  -1  13  -6  56186.  13368.   1
   1 -13   7  27738. 6805.39   1
   1 -13   7  22678. 5652.86   1
  -1  13   7  20661. 5302.99   1
  -1 -13  -7  14267. 4040.70   1
   1  13   7  11690. 3404.98   1
  -1 -13   7  34530. 8300.93   1
   1 -13  -7  16378. 4356.27   1
  -1  13  -7  26504. 6517.26   1
   1 -13   8  69632.  16586.   1
   1 -13   8  94329.  22348.   1
  -1  13   8 100732.  23988.   1
   1  13  -8  66042.  15705.   1
  -1 -13  -8  91219.  21797.   1
   1  13   8  97736.  23279.   1
  -1 -13   8  90693.  21464.   1
   1 -13  -8  85548.  20460.   1
  -1  13  -8  81523.  19328.   1
   1 -13   9  86119.  20457.   1
   1 -13   9  80014.  19019.   1
  -1  13   9 120329.  28630.   1
   1  13  -9  94192.  22319.   1
  -1 -13  -9  81248.  19495.   1
   1  13   9  63595.  15349.   1
  -1 -13   9  75966.  18020.   1
   1 -13  -9  70318.  16970.   1
  -1  13  -9 122616.  28950.   1
   1 -13  10  14615. 3866.91   1
   1 -13  10  12627. 3631.37   1
  -1  13  10  15644. 4491.19   1
   1  13 -10  15442. 4010.97   1
  -1 -13 -10  14983. 4324.26   1
   1  13  10  28905. 7345.07   1
   1 -13 -10  10627. 3654.24   1
  -1  13 -10 8991.53 2867.59   1
   1 -13  11  20944. 5302.99   1
   1 -13  11  27418. 7088.95   1
  -1  13  11  12456. 3921.79   1
  -1 -13 -11  33112. 8364.96   1
   1 -13 -11  13860. 4353.99   1
  -1  13 -11  16702. 4509.49   1
   1 -13  12  24971. 6219.98   1
   1 -13  12  39058. 9737.01   1
  -1  13  12  17466. 5074.31   1
   1  13 -12  10665. 2933.91   1
   1 -13 -12  11722. 4036.13   1
  -1  13 -12  24011. 6316.02   1
   1 -13  13  37800. 9195.05   1
   1 -13  13  40384.  10098.   1
  -1  13  13  47930.  11955.   1
   1  13 -13  41779.  10107.   1
  -1 -13  13  36291. 8801.73   1
   1 -13 -13  68969.  16867.   1
  -1  13 -13  41893.  10354.   1
   1 -13  14  16988. 4424.88   1
   1 -13  14  12563. 4237.36   1
  -1  13  14 6450.94 3114.56   1
   1  13 -14 7091.23 2300.48   1
  -1 -13  14  12954. 3546.76   1
   1 -13 -14 5362.45 3169.45   1
  -1  13 -14 6846.55 3048.25   1
   1 -13  15  35170. 8575.34   1
   1 -13  15  28836. 7528.01   1
   1  13 -15  45598.  11043.   1
  -1 -13  15  38235. 9320.82   1
   1 -13 -15  27372. 7498.28   1
  -1  13 -15  44706.  11056.   1
   1 -13  16  17217. 4486.62  -1
   1 -13  16  18191. 5319.00  -1
   1  13 -16  12595. 3530.75  -1
  -1 -13  16  11153. 3206.03  -1
  -1  13 -16  13332. 4386.00  -1
   1 -13  17  25337. 6322.88   1
   1 -13  17  20348. 5812.94   1
   1  13 -17  17542. 4610.10   1
  -1 -13  17  25200. 6334.32   1
  -1  13 -17  14162. 3844.04   1
  -1  13 -17  16936. 5216.09   1
   1 -13  18  28745. 7125.54  -1
   1 -13  18 9304.82 3725.13  -1
   1  13 -18  25131. 6332.03  -1
  -1  13 -18  16291. 4356.27  -1
  -1  13 -18  14809. 4747.31  -1
   1 -13  19  12582. 3585.64   1
   1 -13  19 5810.65 3565.05   1
   1  13 -19 8273.49 2753.26   1
  -1 -13  19 9503.76 2959.06   1
  -1  13 -19  11681. 3558.19   1
  -1  13 -19 4889.09 3162.59   1
   1 -13  20  24331. 6233.70  -1
   1 -13  20  10197. 3949.23  -1
   1  13 -20  15264. 4278.52  -1
  -1 -13  20  21322. 5561.39  -1
  -1  13 -20 8396.97 3599.36  -1
   1 -13  21 7761.25 2645.78  -1
   1  13 -21 1080.72 1742.74  -1
  -1 -13  21 1172.42 1723.53  -1
  -1  13 -21  10688. 3551.33  -1
  -1  13 -21  501.03 2588.61  -1
   1 -13  22 6059.91 2385.09   1
   1  13 -22 6741.36 2563.46   1
  -1 -13  22 8461.00 2773.84   1
  -1  13 -22 9233.93 3203.75   1
   1 -13  23  17853. 4843.35  -1
   1  13 -23  16012. 4472.90  -1
  -1 -13  23  13673. 3862.33  -1
  -1  13 -23  12154. 3885.20  -1
   1 -13  24  34667. 8634.80   1
   1  13 -24  24514. 6398.35   1
  -1 -13  24  33341. 8248.33   1
  -1  13 -24  27716. 7285.61   1
   1 -13  25 9153.89 3057.39   1
   1  13 -25  15141. 4321.97   1
  -1  13 -25 9743.87 3501.03   1
   1 -13  26 4614.68 2343.93   1
  -1  13 -26 1734.28 2293.62   1
   1 -13  27  19419. 5302.99   1
  -1  13 -27  25269. 6713.92   1
   1 -13  28  10414. 3491.88   1
  -1  13 -28  19531. 5481.36   1
  -1  13 -29 2089.41 2524.58   1
  -1  13 -30 3615.36 2620.62   1
   1  15   0 142236.  33570.   1
   1  15   0 163137.  38349.   1
  -1 -15   0 144820.  34187.   1
  -1 -15   0 170798.  40110.   1
   1 -15   0 147587.  34873.   1
   1 -15   0 140796.  33204.   1
  -1  15   0 123782.  29179.   1
  -1  15   1   21.51 822.318   1
  -1  15  -1 -269.38 924.536   1
  -1  15  -1  48388.  11585.   1
  -1  15   2  -74.37 886.347   1
   1  15   2  57420.  13700.   1
  -1  15  -2  -14.14 913.331   1
   1 -15   3  30825. 7498.28   1
  -1  15   3   14.73 968.213   1
  -1  15  -3  -14.29 921.335   1
   1 -15   4  34987. 8445.00   1
  -1  15   4 -461.47 1048.02   1
  -1  15  -4 -194.24 864.623   1
   1 -15   5  82392.  19497.   1
  -1  15   5 -1107.0 1170.13   1
  -1  15  -5  -37.59 917.218   1
  -1  15   6 -503.77 1299.11   1
  -1  15  -6 -149.83 895.266   1
  -1  15  -6  56231.  13384.   1
   1 -15   7  23828. 5899.83   1
   1 -15   7  31443. 7667.50   1
   1  15  -7  24880. 6103.36   1
  -1 -15  -7  40727.  10098.   1
   1  15   7  45095.  11148.   1
  -1 -15   7  25200. 6149.09   1
   1 -15  -7  29591. 7447.97   1
  -1  15  -7  23279. 5771.78   1
   1 -15   8  52641.  12621.   1
   1 -15   8  59181.  14118.   1
  -1  15   8  31923. 7930.47   1
   1  15  -8  50263.  12024.   1
  -1 -15  -8  41230.  10345.   1
   1  15   8  44843.  11182.   1
  -1 -15   8  61331.  14592.   1
   1 -15  -8  61285.  14811.   1
  -1  15  -8  74160.  17603.   1
   1 -15   9  25246. 6311.45   1
  -1  15   9 8479.30 2929.34   1
   1  15  -9  17537. 4418.02   1
  -1 -15  -9  14070. 4450.03   1
   1  15   9  14288. 4344.84   1
  -1 -15   9  22278. 5499.65   1
   1 -15  -9 9670.70 3279.21   1
  -1  15  -9  20972. 5293.84   1
   1 -15  10  24811. 6169.67   1
   1 -15  10  23371. 5938.71   1
  -1  15  10  14452. 4376.85   1
   1  15 -10  10867. 2961.35   1
  -1 -15 -10 7891.60 3320.37   1
   1  15  10  10480. 3665.67   1
   1 -15 -10  18253. 5335.01   1
  -1  15 -10  29248. 7180.42   1
  -1  15 -10  10089. 2968.21   1
   1 -15  11  13005. 3482.73  -1
  -1  15  11 5776.35 2867.59  -1
  -1 -15 -11 5742.05 3254.06  -1
   1  15  11  15033. 4699.29  -1
  -1 -15  11  10668. 2913.33  -1
   1 -15 -11 2636.63 2757.83  -1
  -1  15 -11  10807. 3000.23  -1
   1 -15  12  14418. 3814.31   1
   1 -15  12  20110. 5499.65   1
  -1  15  12  19860. 5700.89   1
   1  15 -12  14322. 3729.70   1
  -1 -15 -12 9828.48 3745.71   1
   1  15  12  14048. 4395.15   1
  -1 -15  12  12904. 3398.12   1
   1 -15 -12  16668. 5270.98   1
  -1  15 -12  17398. 4534.64   1
  -1  15 -12  19115. 5117.76   1
   1 -15  13  11905. 3235.76   1
   1 -15  13  19662. 5579.69   1
  -1  15  13  16145. 5005.71   1
   1  15 -13  35856. 8698.83   1
  -1 -15 -13  18063. 5344.15   1
   1 -15 -13  20334. 6085.06   1
  -1  15 -13  13137. 3587.92   1
  -1  15 -13  18756. 5254.97   1
   1 -15  14  46215.  11127.   1
   1 -15  14  50789.  12538.   1
  -1  15  14  54539.  13599.   1
   1  15 -14  74914.  17809.   1
  -1 -15  14  83101.  19732.   1
   1 -15 -14  57032.  14288.   1
  -1  15 -14  40819. 9903.95   1
  -1  15 -14  51818.  12762.   1
   1 -15  15  19051. 4847.93   1
   1 -15  15 9801.04 4022.41   1
  -1  15  15 6272.58 3359.25   1
   1  15 -15  10350. 2899.61   1
  -1 -15  15  11669. 3187.74   1
   1 -15 -15 4033.84 3368.39   1
  -1  15 -15  19469. 4985.13   1
  -1  15 -15  13480. 4408.87   1
   1 -15  16  76172.  18145.   1
   1 -15  16  85022.  20514.   1
  -1  15  16  53602.  13478.   1
   1  15 -16  72513.  17295.   1
  -1 -15  16  78550.  18713.   1
   1 -15 -16  71507.  17748.   1
  -1  15 -16  99314.  23599.   1
  -1  15 -16  80197.  19394.   1
   1 -15  17 6016.46 2063.80   1
   1 -15  17  21720. 6233.70   1
   1  15 -17  15909. 4278.52   1
  -1 -15  17 9222.49 2924.76   1
  -1  15 -17 5234.39 2152.07   1
  -1  15 -17 5101.76 3235.76   1
   1 -15  18  29362. 7329.06   1
   1 -15  18  12902. 4353.99   1
   1  15 -18  38280. 9437.45   1
  -1 -15  18  32449. 8060.82   1
  -1  15 -18  24537. 6329.74   1
  -1  15 -18  19161. 5597.98   1
   1 -15  19 9538.07 3034.53  -1
   1 -15  19  14080. 4683.28  -1
   1  15 -19  12998. 3777.72  -1
  -1 -15  19  11681. 3427.85  -1
  -1  15 -19  11104. 3480.44  -1
  -1  15 -19 6505.83 3288.36  -1
   1 -15  20  50309.  12220.   1
   1 -15  20  24628. 6649.89   1
   1  15 -20  42031.  10334.   1
  -1 -15  20  43517.  10643.   1
  -1  15 -20  36908. 9247.65   1
  -1  15 -20  23211. 6501.25   1
   1 -15  21 109033.  25955.   1
   1 -15  21  40087.  10075.   1
   1  15 -21  62085.  15031.   1
  -1 -15  21  75143.  18015.   1
  -1  15 -21  86325.  20743.   1
  -1  15 -21  46101.  11502.   1
   1 -15  22  37754. 9343.69   1
   1  15 -22  21900. 5872.39   1
  -1 -15  22  24194. 6265.72   1
  -1  15 -22  23051. 6210.83   1
  -1  15 -22 9037.27 3770.86   1
   1 -15  23  11724. 3658.81   1
   1  15 -23  18735. 5211.52   1
  -1 -15  23  11608. 3613.08   1
  -1  15 -23  13988. 4326.54   1
  -1  15 -23 4413.44 3039.10   1
   1 -15  24  21539. 5732.90   1
   1  15 -24  21333. 5785.50   1
  -1 -15  24  13576. 3976.67   1
  -1  15 -24  23462. 6412.07   1
   1 -15  25  11786. 3656.53   1
   1  15 -25 9293.38 3372.97   1
  -1 -15  25  10327. 3343.24   1
  -1  15 -25  14139. 4399.72   1
   1 -15  26  19145. 5305.28   1
   1  15 -26  20055. 5552.25   1
  -1 -15  26  17356. 4820.48   1
  -1  15 -26  16568. 4930.25   1
   1 -15  27 7079.80 3135.14   1
   1  15 -27 6238.27 3107.70   1
  -1 -15  27  17418. 5088.04   1
  -1  15 -27 5209.23 3057.39   1
   1 -15  28  141.14 2293.62   1
   1  15 -28  543.79 2458.26   1
  -1 -15  28 5495.08 2483.42   1
  -1  15 -28  759.89 2510.86   1
   1 -15  29  18841. 5474.50  -1
   1  15 -29  12493. 4317.40  -1
  -1  15 -29  12252. 4360.85  -1
   1 -15  30 3123.71 2442.26  -1
  -1  15 -30 5659.72 3020.81  -1
   1 -15  31 3100.84 2563.46   1
  -1  15 -31 3976.67 3045.96   1
   1 -15  32 3697.69 2698.37   1
  -1  15 -32 4568.94 3089.41   1
   1  17   0 132243.  31283.   1
   1  17   0  99405.  23439.   1
  -1 -17   0 130002.  30734.   1
  -1 -17   0 121861.  28676.   1
   1 -17   0 128607.  30460.   1
   1 -17   0  88200.  20926.   1
  -1  17   0  91150.  21608.   1
   1 -17   1 9240.79 2867.59   1
   1  17  -1  12188. 3292.93   1
   1  17  -1  14974. 3613.08   1
  -1 -17  -1 7363.36 2348.50   1
  -1 -17  -1 8666.81 2417.10   1
   1  17   1 5229.81 1926.14   1
  -1 -17   1  12001. 3249.48   1
  -1 -17   1 8410.69 2061.51   1
   1 -17  -1 9741.59 2835.58   1
  -1  17  -1 8195.74 2620.62   1
   1 -17   2  72284.  17256.   1
   1 -17   2  78962.  18758.   1
   1  17  -2  78390.  18651.   1
   1  17  -2  57786.  13618.   1
  -1 -17  -2  92294.  21967.   1
   1  17   2 114704.  27235.   1
  -1 -17   2  66750.  15934.   1
  -1 -17   2  70661.  16650.   1
   1 -17  -2  46421.  11249.   1
  -1  17  -2  64830.  15497.   1
  -1  17  -2  67436.  16067.   1
   1 -17   3 7191.85 2419.39   1
  -1  17   3 -615.37 1083.92   1
   1  17  -3 4171.05 1711.87   1
   1  17  -3  10956. 2675.51   1
  -1 -17  -3 3738.85 1875.60   1
   1  17   3 2474.27 1640.06   1
  -1 -17   3  11335. 3121.42   1
   1 -17  -3 1482.05 1471.76   1
   1 -17   4  45026.  10880.   1
   1 -17   4  63755.  15161.   1
   1  17  -4  46741.  11251.   1
  -1 -17  -4  47450.  11562.   1
   1  17   4  53327.  12918.   1
  -1 -17   4  59776.  14279.   1
   1 -17  -4  45301.  11086.   1
  -1  17  -4  45003.  10887.   1
  -1  17  -4  42214.  10142.   1
   1 -17   5 4045.27 1655.61   1
   1 -17   5 6476.10 2124.17   1
  -1  17   5  -72.83 1194.14   1
   1  17  -5 6492.10 2038.42   1
  -1 -17  -5 3821.17 1945.34   1
   1  17   5 4811.34 2146.12   1
  -1 -17   5 2216.78 1197.80   1
   1 -17  -5 3334.09 1920.42   1
  -1  17  -5 3286.07 1589.07   1
  -1  17  -5  13281. 3523.89   1
   1 -17   6  33455. 8179.73   1
   1 -17   6  28447. 6954.03   1
   1  17  -6  37640. 9105.87   1
  -1 -17  -6  35833. 8897.77   1
   1  17   6  39126. 9672.98   1
  -1 -17   6  41230. 9929.10   1
   1 -17  -6  35902. 8927.50   1
  -1  17  -6  56437.  13542.   1
  -1  17  -6  37686. 9108.15   1
   1 -17   7  11498. 3178.59   1
   1 -17   7 7008.91 2300.48   1
   1  17  -7 6400.63 2019.21   1
  -1 -17  -7 4612.39 2221.81   1
   1  17   7 7921.33 2801.28   1
  -1 -17   7  12147. 3208.32   1
   1 -17  -7  14690. 4175.62   1
  -1  17  -7  14574. 3903.49   1
  -1  17  -7 8504.45 2593.18   1
   1 -17   8  28905. 7118.68   1
   1 -17   8  33272. 8090.55   1
   1  17  -8  40727. 9823.91   1
  -1 -17  -8  31763. 8168.30   1
   1  17   8  41230.  10334.   1
  -1 -17   8  34667. 8403.83   1
   1 -17  -8  25017. 6434.94   1
  -1  17  -8  39058. 9485.47   1
  -1  17  -8  39973. 9661.55   1
   1 -17   9  54928.  13174.  -1
   1 -17   9  40590. 9796.47  -1
   1  17  -9  45506.  10938.  -1
  -1 -17  -9  52916.  13169.  -1
   1  17   9  57283.  14118.  -1
  -1 -17   9  46604.  11196.  -1
   1 -17  -9  55568.  13528.  -1
  -1  17  -9  50469.  12175.  -1
  -1  17  -9  48937.  11756.  -1
   1 -17  10  22589. 5641.43   1
   1 -17  10  10382. 3036.81   1
   1  17 -10  11262. 3064.26   1
  -1 -17 -10 8632.51 3748.00   1
   1  17  10  14400. 4600.96   1
  -1 -17  10  20759. 5193.23   1
   1 -17 -10 6160.52 2769.26   1
  -1  17 -10  17793. 4635.26   1
  -1  17 -10  19634. 5005.71   1
   1 -17  11 8188.88 2769.26   1
   1  17 -11  35879. 8703.40   1
  -1 -17 -11 9046.41 4093.30   1
   1  17  11  12136. 4278.52   1
  -1 -17  11  23119. 5739.76   1
   1 -17 -11  31008. 8232.33   1
  -1  17 -11  19282. 4971.41   1
  -1  17 -11 7768.12 2677.79   1
   1 -17  12  23416. 5856.39   1
   1 -17  12  15406. 4383.71   1
   1  17 -12  22890. 5710.03   1
  -1 -17 -12  13302. 4754.17   1
   1  17  12  11146. 4253.37   1
  -1 -17  12  11562. 3128.28   1
   1 -17 -12  16099. 5323.57   1
  -1  17 -12  25772. 6466.95   1
  -1  17 -12  13970. 3960.66   1
   1 -17  13  32678. 8005.94   1
   1 -17  13  42122.  10492.   1
   1  17 -13  38280. 9275.09   1
  -1 -17 -13  38029.  10139.   1
   1  17  13  40064.  10409.   1
  -1 -17  13  38486. 9320.82   1
   1 -17 -13  50903.  13160.   1
  -1  17 -13  38143. 9334.54   1
  -1  17 -13  43723.  10823.   1
   1 -17  14  22012. 5572.83   1
   1 -17  14  38555. 9716.43   1
   1  17 -14  29796. 7324.48   1
  -1 -17 -14 9018.97 4356.27   1
   1  17  14  10713. 4516.35   1
  -1 -17  14  24171. 6018.75   1
   1 -17 -14  16879. 6107.93   1
  -1  17 -14  29957. 7459.40   1
  -1  17 -14  34073. 8698.83   1
   1 -17  15 6697.91 2226.62   1
   1 -17  15 7217.01 3503.31   1
  -1  17  15  496.68 2901.90   1
   1  17 -15  12342. 3382.11   1
  -1 -17 -15  13254. 5065.17   1
  -1 -17  15  14608. 3864.62   1
   1 -17 -15 8733.13 4751.88   1
  -1  17 -15 5952.43 2239.88   1
  -1  17 -15  14562. 4619.25   1
   1 -17  16 7221.58 2387.37   1
   1 -17  16 2693.80 2661.79   1
  -1  17  16 -672.99 2901.90   1
   1  17 -16 2213.58 1571.92   1
   1 -17 -16 2732.68 3889.77   1
  -1  17 -16 7443.40 2540.59   1
  -1  17 -16 8168.30 3430.14   1
   1 -17  17  24491. 6181.10   1
   1 -17  17  27738. 7299.33   1
   1  17 -17  16821. 4452.32   1
  -1 -17  17  32746. 8063.11   1
   1 -17 -17  33753. 9492.33   1
  -1  17 -17  28973. 7278.75   1
  -1  17 -17  20565. 5767.20   1
   1 -17  18  85296.  20334.   1
   1 -17  18  37457. 9487.76   1
   1  17 -18  61582.  14798.   1
  -1 -17  18  58289.  14043.   1
   1 -17 -18  48982.  12730.   1
  -1  17 -18  58427.  14123.   1
  -1  17 -18  52573.  12925.   1
   1 -17  19  34553. 8529.61   1
   1 -17  19  25612. 6901.43   1
   1  17 -19  37183. 9195.05   1
  -1 -17  19  53327.  12927.   1
   1 -17 -19  20025. 6670.47   1
  -1  17 -19  45575.  11169.   1
  -1  17 -19  32289. 8364.96   1
   1 -17  20 4980.56 2195.06  -1
   1 -17  20 3697.69 3000.23  -1
   1  17 -20 6242.85 2593.18  -1
  -1 -17  20  15511. 4406.58  -1
  -1  17 -20 4184.77 2240.79  -1
  -1  17 -20 2259.32 2947.63  -1
   1 -17  21  16515. 4555.22   1
   1 -17  21 8726.27 3519.32   1
   1  17 -21  17057. 4761.03   1
  -1 -17  21  20098. 5392.17   1
  -1  17 -21  23759. 6279.44   1
  -1  17 -21  13019. 4392.86   1
   1 -17  22 7722.38 2869.88   1
   1 -17  22 2574.89 3004.80   1
   1  17 -22 3677.11 2323.35   1
  -1 -17  22 1787.10 1947.17   1
  -1  17 -22 3866.91 2412.53   1
  -1  17 -22 2819.57 3290.64   1
   1 -17  23 7971.64 2943.06   1
   1 -17  23 2010.75 2513.15   1
   1  17 -23 2796.70 2455.98   1
  -1 -17  23 4758.74 2382.80   1
  -1  17 -23 5572.83 2844.73   1
  -1  17 -23 3473.58 3178.59   1
   1 -17  24 9153.89 3208.32   1
   1  17 -24  26686. 7079.80   1
  -1 -17  24  22342. 5957.00   1
  -1  17 -24  22019. 6062.19   1
  -1  17 -24 8278.06 3814.31   1
   1 -17  25 8776.58 3446.14   1
   1  17 -25 8815.45 3530.75   1
  -1 -17  25 2214.50 2465.12   1
  -1  17 -25 3768.58 2851.59   1
   1 -17  26  23394. 6412.07   1
   1  17 -26  14619. 4690.14   1
  -1 -17  26  27830. 7363.36   1
  -1  17 -26  16147. 5044.59   1
   1 -17  27 4134.46 2890.46   1
   1  17 -27  864.62 2689.23   1
  -1 -17  27 2968.21 2787.56   1
  -1  17 -27 3615.36 3352.39   1
   1 -17  28 2064.48 2380.51  -1
   1  17 -28 5033.15 2997.94  -1
  -1 -17  28 4594.10 2705.23  -1
  -1  17 -28 4004.11 3121.42  -1
   1 -17  29 4717.58 2892.75   1
   1  17 -29  278.76 2680.08   1
  -1 -17  29 2869.88 2682.37   1
  -1  17 -29 3876.05 3258.63   1
   1 -17  30 7525.72 3338.67   1
   1  17 -30 5250.40 3135.14   1
  -1 -17  30 6567.57 3132.86   1
  -1  17 -30 7111.82 3711.41   1
   1  19   0  25566. 6416.64   1
  -1 -19   0  19538. 5021.72   1
  -1 -19   0  16488. 4079.58   1
   1 -19   0  18411. 4804.48   1
   1 -19   0  19945. 5195.51   1
  -1  19   0  17478. 4610.10   1
  -1  19   0  20366. 5225.24   1
   1 -19   1  13849. 3800.59   1
   1 -19   1  29476. 7303.90   1
  -1  19   1  16698. 4420.30   1
   1  19  -1  16668. 4381.43   1
   1  19  -1  15436. 3821.17   1
  -1 -19  -1  11651. 3292.93   1
   1  19   1  12888. 3569.63   1
  -1 -19   1  16149. 4246.51   1
  -1 -19   1  15296. 3702.26   1
   1 -19  -1  16348. 4358.56   1
  -1  19  -1  13519. 3706.83   1
  -1  19  -1  21029. 5367.02   1
   1 -19   2  21818. 5561.39   1
   1 -19   2  12497. 3585.64   1
  -1  19   2  18978. 4996.56   1
   1  19  -2  23439. 5565.97   1
  -1 -19  -2  21367. 5552.25   1
   1  19   2  13499. 3798.30   1
  -1 -19   2  12531. 3420.99   1
  -1 -19   2  16062. 3832.61   1
   1 -19  -2  24194. 6137.66   1
  -1  19  -2  23897. 6069.05   1
  -1  19  -2  15529. 4150.46   1
   1 -19   3  33364. 8214.03   1
   1 -19   3  22483. 5657.44   1
  -1  19   3  24423. 6265.72   1
   1  19  -3  37160. 9062.42   1
   1  19  -3  29865. 7095.81   1
  -1 -19  -3  31283. 7912.18   1
   1  19   3  33913. 8454.14   1
  -1 -19   3  27098. 6723.07   1
   1 -19  -3  21704. 5623.14   1
  -1  19  -3  44798.  10878.   1
  -1  19  -3  28287. 6972.32   1
   1 -19   4  32746. 8056.25   1
   1 -19   4  65699.  15623.   1
  -1  19   4  67116.  16211.   1
   1  19  -4  35673. 8685.10   1
  -1 -19  -4  38120. 9494.62   1
   1  19   4  39515. 9755.31   1
  -1 -19   4  44066.  10670.   1
   1 -19  -4  32175. 8097.41   1
  -1  19  -4  41024.  10007.   1
  -1  19  -4  35994. 8728.55   1
   1 -19   5  28059. 6958.60   1
   1 -19   5  25063. 6213.12   1
  -1  19   5  35971. 9041.84   1
   1  19  -5  24468. 6085.06   1
  -1 -19  -5  25772. 6640.74   1
   1  19   5  27190. 6947.17   1
  -1 -19   5  31946. 7818.42   1
   1 -19  -5  40041. 9951.97   1
  -1  19  -5  36451. 8941.22   1
  -1  19  -5  23051. 5801.50   1
   1 -19   6  14004. 3731.99   1
   1 -19   6  19886. 5056.02   1
  -1  19   6 9391.71 3160.30   1
   1  19  -6  16638. 4278.52   1
  -1 -19  -6 8204.89 2858.45   1
   1  19   6  12815. 3738.85   1
  -1 -19   6  10688. 2972.78   1
   1 -19  -6  15769. 4486.62   1
  -1  19  -6 7402.23 2366.79   1
  -1  19  -6  10236. 3013.95   1
   1 -19   7  34416. 8392.40   1
   1 -19   7  52390.  12566.   1
  -1  19   7  23073. 6057.62   1
   1  19  -7  41550.  10030.   1
  -1 -19  -7  44455.  11002.   1
   1  19   7  31123. 7905.32   1
  -1 -19   7  32335. 7873.31   1
   1 -19  -7  33867. 8538.75   1
  -1  19  -7  36588. 8959.52   1
  -1  19  -7  42168.  10247.   1
   1 -19   8  37754. 9165.32   1
   1 -19   8  34530. 8401.55   1
  -1  19   8  37937. 9435.16   1
   1  19  -8  46147.  11093.   1
  -1 -19  -8  35445. 9018.97   1
   1  19   8  37206. 9483.18   1
  -1 -19   8  27510. 6748.22   1
   1 -19  -8  33295. 8445.00   1
  -1  19  -8  34599. 8479.30   1
  -1  19  -8  38235. 9334.54   1
   1 -19   9  35696. 8685.10   1
   1 -19   9  40430. 9775.89   1
  -1  19   9  38257. 9570.08   1
   1  19  -9  41185. 9924.53   1
  -1 -19  -9  51475.  12918.   1
   1  19   9  41345.  10631.   1
  -1 -19   9  31832. 7758.97   1
   1 -19  -9  29270. 7539.44   1
  -1  19  -9  35308. 8632.51   1
  -1  19  -9  31809. 7832.14   1
   1 -19  10  902.35 1166.02   1
   1 -19  10 1145.44 1588.84   1
  -1  19  10  10448. 3562.77   1
   1  19 -10 2707.52 1335.01   1
  -1 -19 -10  10567. 4374.57   1
   1  19  10 5046.87 3494.17   1
  -1 -19  10 6329.74 1978.27   1
   1 -19 -10  12273. 4029.27   1
  -1  19 -10 4061.28 1697.92   1
  -1  19 -10 7637.77 2611.48   1
   1 -19  11  31877. 7804.70   1
   1 -19  11  13743. 3832.61   1
  -1  19  11  11214. 3946.94   1
   1  19 -11  33798. 8209.46   1
  -1 -19 -11  21710. 6681.91   1
   1  19  11  14942. 5399.03   1
  -1 -19  11  16458. 4219.07   1
   1 -19 -11  16492. 5074.31   1
  -1  19 -11  20069. 5216.09   1
   1 -19  12 9666.12 2787.56   1
   1 -19  12 8746.85 2819.57   1
   1  19 -12  25223. 6270.29   1
  -1 -19 -12  15827. 5492.79   1
   1  19  12  11214. 4678.71   1
  -1 -19  12  14361. 3782.30   1
   1 -19 -12  23416. 6871.71   1
  -1  19 -12  25520. 6380.05   1
  -1  19 -12  13304. 3876.05   1
   1 -19  13  32769. 8053.96   1
   1 -19  13  47450.  11614.   1
   1  19 -13  58198.  13945.   1
  -1 -19 -13  46764.  12218.   1
   1  19  13  34507. 9437.45   1
  -1 -19  13  44043.  10659.   1
   1 -19 -13  39332.  10540.   1
  -1  19 -13  45369.  11034.   1
  -1  19 -13  34965. 8767.43   1
   1 -19  14 8326.08 2622.91   1
   1 -19  14 5344.15 2661.79   1
  -1  19  14 -2702.9 3469.01   1
   1  19 -14  544.02 1300.25   1
  -1 -19 -14  714.15 3562.77   1
   1  19  14 9762.17 4468.32   1
  -1 -19  14 4719.87 1847.01   1
   1 -19 -14 2675.51 3882.91   1
  -1  19 -14 5129.20 2198.49   1
  -1  19 -14  11688. 4045.27   1
   1 -19  15 3992.68 1871.25   1
   1 -19  15 4168.76 2949.92   1
  -1  19  15 -402.01 2997.94   1
   1  19 -15 4866.22 1956.09   1
  -1 -19 -15 6073.63 4262.52   1
   1  19  15  13874. 5158.92   1
  -1 -19  15 1722.61 1552.25   1
   1 -19 -15 4072.72 4308.25   1
  -1  19 -15 2492.57 1809.74   1
  -1  19 -15 5273.26 3164.87   1
   1 -19  16 4971.41 2012.12  -1
   1 -19  16 8159.15 3311.22  -1
  -1  19  16 -1015.5 3185.45  -1
   1  19 -16  16087. 4280.81  -1
  -1 -19 -16  17391. 6027.89  -1
   1  19  16  15753. 5659.72  -1
  -1 -19  16  11596. 3302.08  -1
   1 -19 -16  18575. 6654.46  -1
  -1  19 -16  10306. 3164.87  -1
  -1  19 -16 6986.04 3384.40  -1
   1 -19  17  51841.  12515.   1
   1 -19  17  44134.  11047.   1
   1  19 -17  36039. 8836.03   1
  -1 -19 -17  51269.  13458.   1
  -1 -19  17  44180.  10748.   1
   1 -19 -17  47382.  12904.   1
  -1  19 -17  49463.  11996.   1
  -1  19 -17  42991.  10718.   1
   1 -19  18  15808. 4225.93   1
   1 -19  18  16641. 5124.62   1
  -1  19  18 -1009.8 3311.22   1
  -1 -19  18 7866.45 2570.32   1
   1 -19 -18  11445. 5625.42   1
  -1  19 -18  10364. 3238.05   1
  -1  19 -18  13275. 4388.29   1
   1 -19  19  42351.  10373.   1
   1 -19  19  18173. 5378.45   1
   1  19 -19  39424. 9677.56   1
  -1 -19  19  41093.  10080.   1
   1 -19 -19  26824. 8355.81   1
  -1  19 -19  41528.  10204.   1
  -1  19 -19  25932. 7050.07   1
   1 -19  20  10638. 3194.60   1
   1 -19  20 7356.50 3441.57   1
  -1  19  20 -120.53 3370.68   1
   1  19 -20  11855. 3503.31   1
  -1 -19  20 9089.86 2954.49   1
   1 -19 -20 8198.03 5264.12   1
  -1  19 -20  17000. 4671.85   1
  -1  19 -20 7576.03 3773.15   1
   1 -19  21  12184. 3592.50   1
   1 -19  21 6174.25 3354.67   1
   1  19 -21  14914. 4212.21   1
  -1 -19  21  16506. 4662.70   1
   1 -19 -21  13030. 6300.02   1
  -1  19 -21  10037. 3158.01   1
  -1  19 -21 5863.25 3210.61   1
   1 -19  22 9567.79 3087.12   1
   1 -19  22 4630.68 2890.46   1
   1  19 -22 7955.63 3004.80   1
  -1 -19  22  15168. 4468.32   1
  -1  19 -22 6256.57 2568.03   1
  -1  19 -22 4347.13 3146.58   1
   1 -19  23 1424.65 2083.46   1
   1 -19  23 1367.02 2808.14   1
   1  19 -23 3471.30 2487.99   1
  -1 -19  23 2309.62 2389.66   1
  -1  19 -23 1187.97 1878.34   1
  -1  19 -23  597.76 2682.37   1
   1 -19  24 4582.66 2668.65   1
   1 -19  24 1691.97 2339.35   1
   1  19 -24 4402.01 2876.74   1
  -1 -19  24 9775.89 3670.25   1
  -1  19 -24 6640.74 3121.42   1
  -1  19 -24 3244.91 2730.39   1
   1 -19  25 8310.08 3402.70   1
   1  19 -25 7907.61 3544.47   1
  -1 -19  25 8755.99 3592.50   1
  -1  19 -25  13883. 4626.11   1
  -1  19 -25  258.63 2595.47   1
   1 -19  26 6316.02 3029.95   1
   1  19 -26 8547.90 3478.16   1
  -1 -19  26 5184.08 2959.06   1
  -1  19 -26 8385.54 3505.60   1
  -1  19 -26 -112.07 2154.35   1
   1 -19  27 2936.20 2661.79   1
   1  19 -27 2849.30 2956.78   1
  -1 -19  27  841.30 2579.46   1
  -1  19 -27 3402.70 3013.95   1
   1 -19  28 7866.45 3366.11   1
   1  19 -28 7100.38 3466.72   1
  -1 -19  28 8632.51 3603.93   1
  -1  19 -28  11694. 4271.66   1
   1  21   0  11887. 3420.99   1
  -1 -21   0  11868. 3432.42   1
   1 -21   0  10485. 3222.04   1
  -1  21   0  12433. 3613.08   1
   1 -21   1  47404.  11560.   1
   1 -21   1  42694.  10366.   1
  -1  21   1  35994. 8938.93   1
   1  21  -1  39607. 9725.58   1
  -1 -21  -1  40041. 9874.22   1
   1  21   1  55225.  13384.   1
  -1 -21   1  41619.  10190.   1
  -1 -21   1  45872.  10883.   1
   1 -21  -1  33021. 8232.33   1
  -1  21  -1  55408.  13448.   1
  -1  21  -1  47953.  11553.   1
   1 -21   2 6192.54 2382.80   1
   1 -21   2 8047.10 2664.07   1
   1  21  -2 4045.27 1856.62   1
  -1 -21  -2 4914.24 2196.89   1
   1  21   2 7768.12 2885.89   1
  -1 -21   2 7624.05 2593.18   1
   1 -21  -2  25086. 6430.36   1
  -1  21  -2 6119.36 2339.35   1
  -1  21  -2 6089.63 2286.76   1
   1 -21   3  22721. 5842.67   1
   1 -21   3  22403. 5714.61   1
  -1  21   3  26321. 6851.13   1
   1  21  -3  20789. 5399.03   1
  -1 -21  -3  24514. 6517.26   1
   1  21   3  26709. 6935.74   1
  -1 -21   3  19227. 5019.43   1
   1 -21  -3  17007. 4717.58   1
  -1  21  -3  27029. 6867.13   1
  -1  21  -3  27350. 6816.82   1
   1 -21   4  13908. 3850.90   1
   1 -21   4  16309. 4262.52   1
  -1  21   4  15312. 4591.81   1
   1  21  -4  37091. 9085.29   1
  -1 -21  -4  15646. 4598.67   1
   1  21   4  15086. 4482.04   1
  -1 -21   4  21756. 5538.53   1
   1 -21  -4  15013. 4399.72   1
  -1  21  -4  12163. 3482.73   1
  -1  21  -4  19275. 4939.40   1
   1 -21   5  10629. 3048.25   1
   1 -21   5 7960.20 2439.97   1
  -1  21   5  12653. 4008.69   1
   1  21  -5 6448.66 2163.96   1
  -1 -21  -5 8504.45 3306.65   1
   1  21   5 6729.93 2769.26   1
  -1 -21   5 8792.58 2680.08   1
   1 -21  -5 7233.01 2901.90   1
  -1  21  -5  13968. 3862.33   1
  -1  21  -5  13961. 3727.41   1
   1 -21   6  11729. 3292.93   1
   1 -21   6  12735. 3443.86   1
  -1  21   6  13691. 4276.24   1
   1  21  -6  12449. 3430.14   1
  -1 -21  -6  11919. 3802.88   1
   1  21   6  15657. 4548.36   1
  -1 -21   6  25635. 6375.48   1
   1 -21  -6  13549. 4299.10   1
  -1  21  -6  20272. 5241.25   1
  -1  21  -6  20213. 5133.77   1
   1 -21   7 6373.19 2122.11   1
   1 -21   7 7532.58 2451.40   1
  -1  21   7 9499.19 3420.99   1
   1  21  -7  13281. 3569.63   1
  -1 -21  -7 3196.89 2405.67   1
   1  21   7 6627.02 2741.82   1
  -1 -21   7 8961.80 2645.78   1
   1 -21  -7 3222.04 2359.93   1
  -1  21  -7 7461.69 2423.96   1
  -1  21  -7 6027.89 2257.03   1
   1 -21   8 2572.60 1526.87   1
   1 -21   8  950.61 1561.40   1
  -1  21   8 3491.88 2316.49   1
   1  21  -8 3473.58 1563.23   1
  -1 -21  -8  16625. 4761.03   1
   1  21   8 7468.55 2965.92   1
  -1 -21   8 3320.37 1514.29   1
   1 -21  -8 2153.21 2217.70   1
  -1  21  -8 4456.89 1958.15   1
  -1  21  -8 1053.51 1720.10   1
   1 -21   9 9682.13 2865.31   1
   1 -21   9  10126. 3052.82   1
  -1  21   9 9092.15 3247.20   1
   1  21  -9 8527.32 2632.06   1
  -1 -21  -9 4916.53 2696.09   1
   1  21   9 7598.90 3359.25   1
  -1 -21   9 7726.95 2378.23   1
   1 -21  -9  13211. 4109.30   1
  -1  21  -9 9592.95 2945.34   1
  -1  21  -9  14391. 4006.40   1
   1 -21  10 2375.94 1540.36   1
   1 -21  10 1777.50 1790.76   1
  -1  21  10 6789.38 2908.76   1
   1  21 -10 2321.06 1431.28   1
  -1 -21 -10 5389.89 3158.01   1
   1  21  10 6588.15 3585.64   1
  -1 -21  10 1190.03 1390.58   1
   1 -21 -10 5476.78 2771.55   1
  -1  21 -10 2499.43 1692.66   1
  -1  21 -10 1786.87 1974.61   1
   1 -21  11  33227. 8179.73   1
   1 -21  11  36657. 9012.11   1
  -1  21  11  25680. 6995.19   1
   1  21 -11  34759. 8483.87   1
  -1 -21 -11  25360. 7546.30   1
   1  21  11  48914.  12673.   1
  -1 -21  11  36725. 8959.52   1
   1 -21 -11  29911. 7921.33   1
  -1  21 -11  37434. 9174.47   1
  -1  21 -11  38921. 9604.38   1
   1 -21  12  21429. 5447.06   1
   1 -21  12  37411. 9222.49   1
  -1  21  12  16940. 5597.98   1
   1  21 -12  21434. 5419.62   1
  -1 -21 -12  30894. 9046.41   1
   1  21  12  31146. 9050.99   1
  -1 -21  12  23851. 5975.30   1
   1 -21 -12  23531. 6761.94   1
  -1  21 -12  30460. 7541.73   1
  -1  21 -12  25566. 6606.44   1
   1 -21  13  38029. 9279.66  -1
   1 -21  13  32220. 8019.66  -1
  -1  21  13  54105.  13995.  -1
   1  21 -13  32632. 8001.36  -1
  -1 -21 -13  39172.  11015.  -1
   1  21  13  45644.  12353.  -1
  -1 -21  13  43883.  10649.  -1
   1 -21 -13  47519.  12406.  -1
  -1  21 -13  33730. 8282.64  -1
  -1  21 -13  37023. 9185.91  -1
   1 -21  14  12538. 3498.74   1
   1 -21  14  13391. 4200.77   1
  -1  21  14  10547. 5273.26   1
   1  21 -14  14921. 4036.13   1
  -1 -21 -14  11603. 5399.03   1
   1  21  14 9247.65 5033.15   1
  -1 -21  14  19307. 5028.58   1
   1 -21 -14  10688. 5101.76   1
  -1  21 -14  15406. 4180.19   1
  -1  21 -14  22477. 5977.58   1
   1 -21  15  22136. 5696.31   1
   1 -21  15  27578. 7326.77   1
  -1  21  15  42831.  11624.   1
   1  21 -15  24262. 6165.10   1
  -1 -21 -15  22504. 7285.61   1
   1  21  15  24125. 7534.87   1
  -1 -21  15  28516. 7155.26   1
   1 -21 -15  38143.  10704.   1
  -1  21 -15  21660. 5636.86   1
  -1  21 -15  22008. 6085.06   1
   1 -21  16  20348. 5298.42   1
   1 -21  16  20370. 5908.98   1
  -1  21  16  17334. 6345.75   1
   1  21 -16  21324. 5501.94   1
  -1 -21 -16  13748. 5726.04   1
   1  21  16  16140. 6151.38   1
  -1 -21  16  18061. 4783.90   1
   1 -21 -16  16981. 6540.13   1
  -1  21 -16  17073. 4623.82   1
  -1  21 -16  19504. 5776.35   1
   1 -21  17  10142. 3128.28   1
   1 -21  17 5495.08 3260.92   1
  -1  21  17 9426.01 5168.07   1
   1  21 -17 5570.54 2237.13   1
  -1 -21 -17 3409.56 4454.60   1
   1  21  17  11173. 5243.54   1
  -1 -21  17 7717.81 2600.04   1
   1 -21 -17 5449.34 5282.41   1
  -1  21 -17 8063.11 2796.70   1
  -1  21 -17 3217.47 3144.29   1
   1 -21  18  27098. 6887.71   1
   1 -21  18  18139. 5399.03   1
  -1  21  18  28539. 8879.48   1
   1  21 -18  29499. 7399.95   1
  -1 -21 -18  13695. 5954.72   1
   1  21  18  19650. 6972.32   1
  -1 -21  18  27853. 7038.64   1
   1 -21 -18  35971.  10837.   1
  -1  21 -18  28790. 7297.04   1
  -1  21 -18  16071. 4939.40   1
   1 -21  19  11223. 3343.24   1
   1 -21  19 5844.95 3254.06   1
  -1  21  19  11171. 5124.62   1
   1  21 -19  21086. 5490.50   1
  -1 -21 -19 5929.56 4735.88   1
  -1 -21  19 9983.98 3034.53   1
   1 -21 -19 7139.26 5376.17   1
  -1  21 -19  13965. 3921.79   1
  -1  21 -19 8271.20 3695.40   1
   1 -21  20 4877.65 2087.81   1
   1 -21  20 3048.25 2851.59   1
  -1  21  20 6533.27 4422.59   1
   1  21 -20  10848. 3283.78   1
  -1 -21  20 4987.42 2216.33   1
   1 -21 -20 6107.93 4923.39   1
  -1  21 -20 1782.53 1779.10   1
  -1  21 -20 1335.24 2744.11   1
   1 -21  21 5620.85 2364.51   1
   1 -21  21 3830.32 2570.32   1
  -1  21  21 2013.26 3667.96   1
   1  21 -21 6107.93 2435.40   1
  -1 -21  21 2915.62 1991.31   1
   1 -21 -21 4001.83 4584.95   1
  -1  21 -21 5858.67 2419.39   1
  -1  21 -21 2401.10 2750.97   1
   1 -21  22  822.55 1803.79   1
   1 -21  22 1040.93 2339.35   1
  -1  21  22 3077.98 3784.58   1
   1  21 -22  799.68 1870.57   1
  -1 -21  22 3004.80 2237.13   1
   1 -21 -22  403.38 4312.82   1
  -1  21 -22  919.05 1988.34   1
  -1  21 -22  553.40 2140.63   1
   1 -21  23 3055.11 2182.71   1
   1 -21  23  473.36 2048.02   1
   1  21 -23  224.97 1966.84   1
  -1 -21  23 1715.07 2341.64   1
   1 -21 -23 1437.68 4020.12   1
  -1  21 -23 3974.38 2225.93   1
  -1  21 -23  775.90 2446.83   1
   1 -21  24  929.11 2055.57   1
   1 -21  24   48.18 2124.40   1
   1  21 -24 3871.48 2622.91   1
  -1 -21  24 1051.91 2353.07   1
  -1  21 -24 1245.37 2099.47   1
  -1  21 -24 -522.98 2419.39   1
   1 -21  25 1910.36 2362.22   1
   1 -21  25   63.82 2214.95   1
   1  21 -25 1297.73 2435.40   1
  -1 -21  25 6805.39 3151.15   1
  -1  21 -25  880.40 2161.21   1
  -1  21 -25   74.34 2403.38   1
   1 -21  26 5142.92 2895.03   1
   1  21 -26 7969.35 3432.42   1
  -1 -21  26  17704. 5323.57   1
  -1  21 -26 7395.37 3203.75   1
  -1  21 -26  534.19 2568.03   1
   1  23   0  20110. 5254.97   1
  -1 -23   0  16401. 4482.04   1
   1 -23   0  18219. 4868.51   1
   1 -23   0  13929. 4072.72   1
  -1  23   0  15687. 4337.98   1
   1 -23   1 4015.55 1983.76   1
   1 -23   1 3210.61 2099.70   1
  -1  23   1 6178.82 2307.34   1
   1  23  -1 3599.36 1772.92   1
  -1 -23  -1 8877.19 2874.45   1
   1  23   1 6613.30 2581.75   1
  -1 -23   1 3871.48 1880.40   1
   1 -23  -1 4450.03 2056.94   1
  -1  23  -1 4289.96 2110.22   1
  -1  23  -1 6048.47 2442.26   1
   1 -23   2  15207. 4193.91   1
   1 -23   2  20858. 5529.38   1
  -1  23   2  13579. 3896.63   1
   1  23  -2  12399. 3567.34   1
  -1 -23  -2  13334. 3857.76   1
   1  23   2  14219. 4159.61   1
  -1 -23   2  21402. 5554.53   1
   1 -23  -2  14118. 3988.10   1
  -1  23  -2  12605. 3597.07   1
  -1  23  -2  10050. 3135.14   1
   1 -23   3  19158. 5049.16   1
   1 -23   3  18779. 5033.15   1
  -1  23   3  13753. 4042.99   1
   1  23  -3  17315. 4589.52   1
  -1 -23  -3  17569. 5074.31   1
   1  23   3  11244. 3670.25   1
  -1 -23   3  19673. 5172.65   1
   1 -23  -3  16696. 4564.37   1
  -1  23  -3  19691. 5158.92   1
  -1  23  -3  21836. 5632.28   1
   1 -23   4 8053.96 2618.34   1
   1 -23   4 6752.79 2536.01   1
  -1  23   4 8403.83 3151.15   1
   1  23  -4 8456.43 2634.34   1
  -1 -23  -4 8031.09 3190.03   1
   1  23   4 5037.73 2782.98   1
  -1 -23   4 4351.70 1907.38   1
   1 -23  -4 5675.73 2670.93   1
  -1  23  -4 7486.84 2538.30   1
  -1  23  -4  13670. 3830.32   1
   1 -23   5  16010. 4269.38   1
   1 -23   5  22175. 5650.58   1
  -1  23   5  17706. 5154.35   1
   1  23  -5  15424. 4171.05   1
  -1 -23  -5  14715. 4541.50   1
   1  23   5  12719. 4058.99   1
  -1 -23   5  24331. 6183.39   1
   1 -23  -5  14530. 4511.77   1
  -1  23  -5  18161. 4799.90   1
  -1  23  -5  19284. 4991.99   1
   1 -23   6  15228. 4072.72   1
   1 -23   6  14496. 3972.10   1
  -1  23   6  15237. 4692.43   1
   1  23  -6 9757.59 2881.31   1
  -1 -23  -6  14722. 4639.83   1
   1  23   6  13359. 4191.63   1
  -1 -23   6 8522.75 2668.65   1
   1 -23  -6  10135. 3782.30   1
  -1  23  -6  13723. 3823.46   1
  -1  23  -6  14219. 3908.07   1
   1 -23   7  18363. 4765.60   1
   1 -23   7  22890. 5780.92   1
  -1  23   7  22454. 6240.56   1
   1  23  -7  18001. 4651.26   1
  -1 -23  -7  21898. 6059.91   1
   1  23   7  14192. 4374.57   1
  -1 -23   7  19424. 5010.29   1
   1 -23  -7  20697. 5924.99   1
  -1  23  -7  15914. 4296.82   1
  -1  23  -7  15927. 4315.11   1
   1 -23   8  10146. 2959.06   1
   1 -23   8 9785.04 2965.92   1
  -1  23   8 5799.22 2899.61   1
   1  23  -8 8465.58 2625.20   1
  -1 -23  -8 5273.26 2780.70   1
   1  23   8 7642.34 3283.78   1
  -1 -23   8  12081. 3366.11   1
   1 -23  -8 6546.99 3233.47   1
  -1  23  -8 6629.31 2353.07   1
  -1  23  -8  12134. 3505.60   1
   1 -23   9  17025. 4498.05   1
   1 -23   9 7363.36 2483.42   1
  -1  23   9  14544. 4523.21   1
   1  23  -9  13272. 3608.50   1
  -1 -23  -9  18299. 5344.15   1
   1  23   9  10579. 3972.10   1
  -1 -23   9  11127. 3210.61   1
   1 -23  -9 9190.48 3635.94   1
  -1  23  -9  11594. 3347.81   1
  -1  23  -9  10983. 3398.12   1
   1 -23  10  10553. 3089.41   1
   1 -23  10  10899. 3176.31   1
  -1  23  10 9181.33 3514.75   1
   1  23 -10 5593.41 2035.21   1
  -1 -23 -10 4340.27 2920.19   1
   1  23  10 7377.08 3846.33   1
  -1 -23  10 6329.74 2234.62   1
   1 -23 -10 9400.86 3521.61   1
  -1  23 -10 5732.90 2152.52   1
  -1  23 -10 8904.63 2897.32   1
   1 -23  11 5010.29 2043.90   1
   1 -23  11 3953.80 1993.14   1
  -1  23  11 5225.24 2968.21   1
   1  23 -11 7317.62 2366.79   1
  -1 -23 -11 3601.64 3350.10   1
   1  23  11  10681. 4850.21   1
  -1 -23  11  12630. 3501.03   1
   1 -23 -11 5552.25 3093.98   1
  -1  23 -11 4578.09 1912.87   1
  -1  23 -11 5357.87 2298.19   1
   1 -23  12 5165.79 2094.90   1
   1 -23  12 2146.35 1839.24   1
  -1  23  12 1432.88 3155.73   1
   1  23 -12 3521.61 1693.12   1
  -1 -23 -12 4203.06 4152.75   1
   1  23  12 5291.56 4644.40   1
  -1 -23  12 2373.65 1550.19   1
   1 -23 -12 1450.72 2963.64   1
  -1  23 -12 2403.38 1691.06   1
  -1  23 -12 1626.57 1951.06   1
   1 -23  13 3308.94 1794.19   1
   1 -23  13 5291.56 2366.79   1
  -1  23  13 2389.66 3535.33   1
   1  23 -13 6668.19 2307.34   1
  -1 -23 -13 1943.74 4356.27   1
   1  23  13 4129.88 4841.07   1
  -1 -23  13 6382.34 2268.69   1
   1 -23 -13 4564.37 3661.10   1
  -1  23 -13 5270.98 2097.19   1
  -1  23 -13 5140.63 2444.54   1
   1 -23  14 2183.40 1725.82  -1
   1 -23  14 3528.47 2590.90  -1
  -1  23  14 2922.48 4077.29  -1
   1  23 -14 1026.07 1445.46  -1
  -1 -23 -14 5694.03 5145.20  -1
   1  23  14 6677.33 4715.29  -1
  -1 -23  14 2689.23 1741.82  -1
   1 -23 -14 1755.32 3807.45  -1
  -1  23 -14 1460.78 1596.39  -1
  -1  23 -14 1431.51 2239.19  -1
   1 -23  15 6412.07 2371.37   1
   1 -23  15 3688.54 2638.92   1
  -1  23  15 9410.01 4989.70   1
   1  23 -15 9286.52 2933.91   1
  -1 -23 -15 7022.63 5138.34   1
   1  23  15 7676.65 4806.76   1
  -1 -23  15 9949.68 3043.67   1
   1 -23 -15  10581. 5225.24   1
  -1  23 -15 9995.42 3036.81   1
  -1  23 -15 5053.73 2744.11   1
   1 -23  16 3450.72 1922.48   1
   1 -23  16 2029.95 2467.41   1
  -1  23  16 -520.24 4495.77   1
   1  23 -16 3722.84 1898.92   1
  -1 -23 -16 3773.15 4552.93   1
   1  23  16 3327.23 4335.69   1
  -1 -23  16 3126.00 1876.74   1
   1 -23 -16 1471.07 4539.21   1
  -1  23 -16 5694.03 2276.01   1
  -1  23 -16 2071.80 2682.37   1
   1 -23  17 4642.12 2205.81   1
   1 -23  17 5648.29 2904.18   1
  -1  23  17 6793.96 4507.20   1
   1  23 -17 5085.75 2176.99   1
  -1 -23 -17 3731.99 4319.68   1
   1  23  17 6155.95 4532.35   1
  -1 -23  17  10178. 3251.77   1
   1 -23 -17 4950.83 4781.61   1
  -1  23 -17 5360.16 2362.22   1
  -1  23 -17 8504.45 3441.57   1
   1 -23  18  681.91 1678.94  -1
   1 -23  18 3480.44 2501.71  -1
  -1  23  18    8.15 3709.12  -1
   1  23 -18  254.06 1571.23  -1
  -1 -23 -18 1624.51 4374.57  -1
   1  23  18 1119.60 3706.83  -1
  -1 -23  18 1011.66 1694.03  -1
   1 -23 -18 1102.45 4337.98  -1
  -1  23 -18 1647.84 1867.82  -1
  -1  23 -18  877.43 2375.94  -1
   1 -23  19 2394.24 1915.16   1
   1 -23  19   75.12 2264.12   1
  -1  23  19 3363.82 3720.55   1
   1  23 -19 7754.39 2750.97   1
  -1 -23 -19 1624.06 3985.82   1
   1  23  19 3139.72 3663.39   1
  -1 -23  19 4113.88 2108.39   1
   1 -23 -19  926.37 3855.47   1
  -1  23 -19 3363.82 2157.33   1
  -1  23 -19 -156.85 2341.64   1
   1 -23  20 3116.85 2070.43   1
   1 -23  20 7592.03 3080.26   1
  -1  23  20  932.31 3542.19   1
   1  23 -20 5941.00 2497.14   1
  -1 -23 -20  672.08 4008.69   1
   1  23  20 1455.52 3491.88   1
  -1 -23  20 4891.37 2389.66   1
   1 -23 -20  559.80 3976.67   1
  -1  23 -20 3375.25 2219.98   1
  -1  23 -20 1927.28 2414.82   1
   1 -23  21 3013.95 2028.13  -1
   1 -23  21 1952.89 2343.93  -1
  -1  23  21  649.21 3734.27  -1
   1  23 -21 4040.70 2246.97  -1
  -1 -23 -21  414.82 4168.76  -1
  -1 -23  21 2929.34 2093.98  -1
   1 -23 -21  450.03 4319.68  -1
  -1  23 -21 1467.18 2096.27  -1
  -1  23 -21 1499.88 2414.82  -1
   1 -23  22 1729.02 2005.94   1
   1 -23  22 2076.83 2254.97   1
  -1  23  22 -1044.4 3821.17   1
   1  23 -22  613.54 1825.06   1
  -1 -23  22 1635.03 1980.79   1
   1 -23 -22 1105.88 4484.33   1
  -1  23 -22  683.97 1929.11   1
  -1  23 -22 1114.79 2186.83   1
   1 -23  23 1767.66 2075.00   1
   1 -23  23 1662.02 2586.32   1
  -1  23  23 1551.34 4879.94   1
   1  23 -23 2542.87 2018.98   1
  -1 -23  23 2206.03 2075.00   1
   1 -23 -23  473.59 5312.14   1
  -1  23 -23 1197.35 1929.79   1
  -1  23 -23 1592.73 2700.66   1
   1  25   0 1680.77 1914.02   1
  -1 -25   0 4026.98 2401.10   1
   1 -25   0 3334.09 2221.81   1
   1 -25   0 1525.72 1843.13   1
  -1  25   0 3135.14 2047.33   1
   1 -25   1  18966. 5241.25   1
   1 -25   1  11646. 3546.76   1
  -1  25   1  29911. 7635.48   1
   1  25  -1  30300. 7701.80   1
  -1 -25  -1  12840. 4045.27   1
   1  25   1  22319. 5970.72   1
  -1 -25   1  20117. 5472.21   1
   1 -25  -1  22772. 6103.36   1
  -1  25  -1  20949. 5593.41   1
  -1  25  -1  16167. 4292.24   1
   1 -25   2 1282.87 1907.16   1
   1 -25   2 1429.22 1940.77   1
  -1  25   2 3960.66 2471.98   1
   1  25  -2 1391.03 1751.88   1
  -1 -25  -2 1333.87 2054.65   1
   1  25   2 2061.05 2428.54   1
  -1 -25   2 2055.11 1944.89   1
   1 -25  -2 4578.09 2451.40   1
  -1  25  -2 2938.48 1998.17   1
  -1  25  -2  787.33 1671.85   1
   1 -25   3 1040.25 1835.12   1
   1 -25   3 4822.77 2273.95   1
  -1  25   3 6261.14 2913.33   1
   1  25  -3 7797.84 2945.34   1
  -1 -25  -3 1714.15 2391.95   1
   1  25   3 1407.50 2680.08   1
  -1 -25   3 6954.03 2707.52   1
   1 -25  -3 3640.52 2385.09   1
  -1  25  -3 3496.45 2064.94   1
  -1  25  -3 5261.83 2121.20   1
   1 -25   4  22337. 5963.86  -1
   1 -25   4 8509.02 2826.43  -1
  -1  25   4 9798.76 3695.40  -1
   1  25  -4  11281. 3553.62  -1
  -1 -25  -4  15285. 4907.38  -1
   1  25   4 8792.58 3574.20  -1
  -1 -25   4  16883. 4697.00  -1
   1 -25  -4 9064.71 3400.41  -1
  -1  25  -4  26847. 6896.86  -1
  -1  25  -4  13821. 3748.00  -1
   1 -25   5  14702. 4225.93   1
   1 -25   5  12479. 3592.50   1
  -1  25   5  21180. 5982.16   1
   1  25  -5  15129. 4244.22   1
  -1 -25  -5  10441. 4079.58   1
   1  25   5  11409. 4136.74   1
  -1 -25   5 7011.20 2712.09   1
   1 -25  -5  10537. 3958.38   1
  -1  25  -5 8428.99 2860.73   1
  -1  25  -5  10782. 3176.31   1
   1 -25   6  311.69 1482.73   1
   1 -25   6 6446.37 2387.37   1
  -1  25   6 1841.98 2721.24   1
   1  25  -6 2577.18 1792.36   1
  -1 -25  -6 2071.12 2828.72   1
   1  25   6 6809.96 3391.26   1
  -1 -25   6 9366.56 3068.83   1
   1 -25  -6 3299.79 2895.03   1
  -1  25  -6 1566.89 1721.70   1
  -1  25  -6 2371.37 1704.78   1
   1 -25   7 6670.47 2412.53   1
   1 -25   7 9947.39 3174.02   1
  -1  25   7 5979.87 3247.20   1
   1  25  -7 8595.92 2785.27   1
  -1 -25  -7  13652. 4731.30   1
   1  25   7 4658.12 3091.70   1
  -1 -25   7  10178. 3093.98   1
   1 -25  -7 9147.03 4077.29   1
  -1  25  -7 9183.62 2924.76   1
  -1  25  -7  11576. 3453.00   1
   1 -25   8  12234. 3528.47   1
   1 -25   8  12671. 3656.53   1
  -1  25   8  11104. 4150.46   1
   1  25  -8  10231. 3071.12   1
  -1 -25  -8  10446. 4187.05   1
   1  25   8  11278. 4264.80   1
  -1 -25   8  10958. 3222.04   1
   1 -25  -8 9654.69 4017.83   1
  -1  25  -8  16524. 4479.76   1
  -1  25  -8 9746.16 3061.97   1
   1 -25   9  312.14 1463.30   1
   1 -25   9  812.48 1817.74   1
  -1  25   9 7059.22 3404.98   1
   1  25  -9 2131.03 1569.63   1
  -1 -25  -9 3727.41 3260.92   1
   1  25   9 1267.78 2956.78   1
  -1 -25   9 1606.68 1486.62   1
   1 -25  -9 4751.88 3427.85   1
  -1  25  -9 1338.44 1476.33   1
  -1  25  -9 2723.53 1904.18   1
   1 -25  10  14180. 3949.23   1
   1 -25  10  12053. 3514.75   1
  -1  25  10  14612. 4998.85   1
   1  25 -10  16821. 4470.61   1
  -1 -25 -10  12575. 4774.75   1
   1  25  10  13103. 4820.48   1
  -1 -25  10  13272. 3741.14   1
   1 -25 -10  13181. 4884.51   1
  -1  25 -10  11973. 3457.58   1
  -1  25 -10  16270. 4447.74   1
   1 -25  11 6322.88 2375.94   1
   1 -25  11 5892.97 2398.81   1
  -1  25  11 7123.25 3537.61   1
   1  25 -11 7850.44 2547.45   1
  -1 -25 -11 4632.97 3633.66   1
   1  25  11 8589.06 4260.23   1
  -1 -25  11  10046. 3027.67   1
   1 -25 -11 7690.37 3974.38   1
  -1  25 -11 5954.72 2255.20   1
  -1  25 -11 8579.91 2892.75   1
   1 -25  12  19083. 5030.87  -1
   1 -25  12  21550. 5625.42  -1
  -1  25  12  14928. 5172.65  -1
   1  25 -12  14825. 4004.11  -1
  -1 -25 -12  11475. 5014.86  -1
   1  25  12  20572. 6748.22  -1
  -1 -25  12  25657. 6498.96  -1
   1 -25 -12  12543. 5115.48  -1
  -1  25 -12  27441. 6876.28  -1
  -1  25 -12  14176. 4038.41  -1
   1 -25  13 3917.22 1892.29   1
   1 -25  13 3331.81 2005.94   1
  -1  25  13 7386.23 3846.33   1
   1  25 -13 4532.35 1897.32   1
  -1 -25 -13 5977.58 4616.96   1
   1  25  13 7319.91 4827.35   1
  -1 -25  13 3793.73 1807.22   1
   1 -25 -13 6983.76 4164.19   1
  -1  25 -13 7084.37 2407.96   1
  -1  25 -13 4205.35 2293.62   1
   1 -25  14 1083.92 1565.51   1
   1 -25  14 1305.28 1851.59   1
  -1  25  14  443.63 3158.01   1
   1  25 -14 6489.82 2316.49   1
  -1 -25 -14 2696.09 3967.52   1
   1  25  14 1647.61 3713.69   1
  -1 -25  14  934.37 1634.35   1
   1 -25 -14  845.87 3443.86   1
  -1  25 -14  999.54 1595.24   1
  -1  25 -14 1225.02 2059.00   1
   1 -25  15  10517. 3295.22   1
   1 -25  15 5728.33 2545.16   1
  -1  25  15 5840.38 4052.13   1
   1  25 -15 5957.00 2389.66   1
  -1 -25 -15 7351.93 4626.11   1
   1  25  15 7415.95 4267.09   1
  -1 -25  15 5913.56 2538.30   1
   1 -25 -15 6837.40 4253.37   1
  -1  25 -15 6464.66 2547.45   1
  -1  25 -15  13496. 4010.97   1
   1 -25  16 3594.78 2211.52   1
   1 -25  16 2766.98 2259.77   1
  -1  25  16 2723.53 3567.34   1
   1  25 -16 9485.47 3068.83   1
  -1 -25 -16 1808.14 4257.94   1
   1  25  16 6638.46 4418.02   1
  -1 -25  16 7473.12 2792.13   1
   1 -25 -16 5227.53 4427.16   1
  -1  25 -16 4072.72 2111.82   1
  -1  25 -16 3855.47 2375.94   1
   1 -25  17  10652. 3439.28   1
   1 -25  17 3690.83 2428.54   1
  -1  25  17 4646.69 4184.77   1
   1  25 -17 6130.80 2563.46   1
  -1 -25 -17 2334.78 4278.52   1
   1  25  17 2174.94 3983.53   1
  -1 -25  17 7246.73 2778.41   1
   1 -25 -17 2245.37 4466.04   1
  -1  25 -17  11159. 3549.05   1
  -1  25 -17 8035.67 3217.47   1
   1 -25  18 1482.05 1958.38   1
   1 -25  18 -250.63 2209.24   1
  -1  25  18 1182.25 3969.81   1
   1  25 -18 1423.96 1988.11   1
  -1 -25 -18 2504.00 4452.32   1
   1  25  18 -772.70 4296.82   1
  -1 -25  18 -133.36 1792.59   1
   1 -25 -18 1040.25 4479.76   1
  -1  25 -18 4424.88 2334.78   1
  -1  25 -18 1297.73 2423.96   1
   1 -25  19 1379.37 1957.69  -1
   1 -25  19 1834.44 2359.93  -1
  -1  25  19 1632.52 4937.11  -1
   1  25 -19 1610.56 1853.42  -1
  -1 -25 -19  232.79 5131.48  -1
   1  25  19 2002.74 4918.82  -1
  -1 -25  19 4317.40 2262.52  -1
   1 -25 -19 1837.41 5735.19  -1
  -1  25 -19 3217.47 2119.14  -1
  -1  25 -19 1350.10 2467.41  -1
   1  27   0 1367.02 1980.33   1
  -1 -27   0 2542.87 2169.68   1
   1 -27   0 3757.14 2442.26   1
   1 -27   0  498.28 2010.06   1
  -1  27   0 2460.55 2080.49   1
   1 -27   1 4040.70 2398.81   1
   1 -27   1 4278.52 2244.91   1
  -1  27   1 4980.56 2394.24   1
   1  27  -1 4900.52 2398.81   1
  -1 -27  -1 1929.79 2143.61   1
   1  27   1 2241.25 2222.50   1
  -1 -27   1 3844.04 2341.64   1
   1 -27  -1 4886.80 2616.05   1
  -1  27  -1 4596.38 2364.51   1
  -1  27  -1 5732.90 2401.10   1
   1 -27   2  927.28 2243.54   1
   1 -27   2 -323.12 1990.39   1
  -1  27   2 3313.51 2513.15   1
   1  27  -2 1844.27 1924.99   1
  -1 -27  -2  771.78 2128.29   1
   1  27   2  115.87 2209.47   1
  -1 -27   2 4383.71 2396.52   1
   1 -27  -2 1231.42 2117.08   1
  -1  27  -2 2897.32 2098.33   1
  -1  27  -2  914.70 1728.79   1
   1 -27   3 5225.24 2549.73   1
   1 -27   3 2794.42 2169.90   1
  -1  27   3 2248.34 2366.79   1
   1  27  -3 5099.47 2417.10   1
  -1 -27  -3 2728.10 2545.16   1
   1  27   3 1878.57 2600.04   1
  -1 -27   3 5744.33 2586.32   1
   1 -27  -3 2643.49 2554.31   1
  -1  27  -3 3439.28 2305.05   1
  -1  27  -3 1200.78 1730.85   1
   1 -27   4 4155.04 2359.93   1
   1 -27   4 4399.72 2282.18   1
  -1  27   4 5636.86 3020.81   1
   1  27  -4 6089.63 2540.59   1
  -1 -27  -4 4939.40 3304.36   1
   1  27   4  11692. 4333.41   1
  -1 -27   4 7114.10 2803.56   1
   1 -27  -4 6855.70 3126.00   1
  -1  27  -4 8525.03 2961.35   1
  -1  27  -4 4747.31 2196.66   1
   1 -27   5 2574.89 2061.05   1
   1 -27   5 2449.12 1809.28   1
  -1  27   5 2677.79 2808.14   1
   1  27  -5 1923.39 1900.98   1
  -1 -27  -5  816.83 3029.95   1
   1  27   5 1385.55 2975.07   1
  -1 -27   5 2149.32 1954.95   1
   1 -27  -5 1724.90 2821.86   1
  -1  27  -5 2151.61 1896.41   1
  -1  27  -5 2510.86 1954.49   1
   1 -27   6  13673. 4109.30   1
   1 -27   6 1608.73 1767.66   1
  -1  27   6  752.11 3048.25   1
   1  27  -6 1562.54 1804.48   1
   1  27  -6  992.68 772.467   1
  -1 -27  -6 2175.85 3350.10   1
   1  27   6 1474.04 3075.69   1
  -1 -27   6 2394.24 1904.41   1
   1 -27  -6 6048.47 3686.25   1
  -1  27  -6  12227. 3686.25   1
  -1  27  -6 1800.59 1707.98   1
   1 -27   7 2282.87 1884.97  -1
   1 -27   7 2531.44 1760.57  -1
  -1  27   7 1185.91 2917.90  -1
   1  27  -7 3260.92 2010.75  -1
  -1 -27  -7 1559.57 3343.24  -1
   1  27   7 2234.62 3217.47  -1
  -1 -27   7 2739.54 1914.93  -1
   1 -27  -7 1578.78 3164.87  -1
  -1  27  -7 1292.25 1840.15  -1
  -1  27  -7 7027.21 2536.01  -1
   1 -27   8 7765.83 2863.02   1
   1 -27   8 7729.24 2574.89   1
  -1  27   8 7960.20 3953.80   1
   1  27  -8 8641.66 2933.91   1
  -1 -27  -8 8701.11 4328.83   1
   1  27   8 7665.21 4205.35   1
  -1 -27   8 5758.06 2373.65   1
   1 -27  -8 7018.06 3978.96   1
  -1  27  -8 5842.67 2401.10   1
  -1  27  -8  14656. 4010.97   1
   1 -27   9 1388.98 1829.18   1
   1 -27   9 6896.86 2556.59   1
  -1  27   9 1635.49 3059.68   1
   1  27  -9 1870.57 1808.60   1
  -1 -27  -9 1520.69 3761.72   1
   1  27   9 2657.21 3411.84   1
  -1 -27   9 3567.34 2120.51   1
   1 -27  -9 1164.42 3430.14   1
  -1  27  -9 1358.33 1809.51   1
  -1  27  -9 3340.95 1949.46   1
   1 -27  10 4934.82 2387.37   1
   1 -27  10 4589.52 2230.50   1
  -1  27  10 5003.43 3679.39   1
   1  27 -10  11022. 3441.57   1
  -1 -27 -10 4973.70 3928.65   1
   1  27  10 4534.64 3350.10   1
  -1 -27  10  11363. 3494.17   1
   1 -27 -10 6997.48 3894.35   1
  -1  27 -10  10910. 3391.26   1
  -1  27 -10 8010.51 2771.55   1
   1 -27  11 6222.27 2542.87   1
   1 -27  11 9300.24 3004.80   1
  -1  27  11 3821.17 3155.73   1
   1  27 -11 6359.47 2563.46   1
  -1 -27 -11 7226.15 3889.77   1
   1  27  11 8573.05 4040.70   1
  -1 -27  11 6290.87 2604.62   1
   1 -27 -11 8927.50 4001.83   1
  -1  27 -11  11811. 3597.07   1
  -1  27 -11  11262. 3459.86   1
   1 -27  12  -59.84 1730.85   1
   1 -27  12  901.67 1999.31   1
  -1  27  12  822.78 2782.98   1
   1  27 -12 1921.33 1721.24   1
  -1 -27 -12  602.79 3233.47   1
   1  27  12  -45.14 3338.67   1
  -1 -27  12  848.84 1686.48   1
   1 -27 -12 2780.70 3288.36   1
  -1  27 -12 -169.79 1700.20   1
  -1  27 -12  -88.73 2066.54   1
   1 -27  13  14971. 4331.12   1
   1 -27  13  16291. 4479.76   1
  -1  27  13 7365.65 3745.71   1
   1  27 -13 9522.06 3029.95   1
  -1 -27 -13 6386.91 4639.83   1
   1  27  13  12326. 5442.48   1
  -1 -27  13  20848. 5538.53   1
   1 -27 -13 9341.40 4498.05   1
  -1  27 -13  10130. 3169.45   1
  -1  27 -13  10220. 3361.53   1
   1 -27  14 3978.96 2082.78   1
   1 -27  14 1190.03 2067.23   1
  -1  27  14 1329.75 3391.26   1
   1  27 -14 1058.54 1589.53   1
  -1 -27 -14  631.60 4459.18   1
   1  27  14 1934.14 4726.73   1
  -1 -27  14 1105.65 1544.93   1
   1 -27 -14  757.37 3448.43   1
  -1  27 -14  946.26 1670.02   1
  -1  27 -14 2444.54 2355.36   1
   1  29   0 8897.77 3180.88   1
  -1 -29   0 9092.15 3286.07   1
   1 -29   0 6777.95 2931.62   1
   1 -29   0 7173.56 2803.56   1
  -1  29   0 6928.88 2764.69   1
   1 -29   1 3478.16 2524.58   1
   1 -29   1  846.56 2123.25   1
  -1  29   1  14189. 4164.19   1
  -1 -29  -1 1911.73 2157.33   1
   1  29   1 1450.49 2112.05   1
  -1 -29   1 7452.54 2940.77   1
   1 -29  -1  10421. 3617.65   1
  -1  29  -1 1226.16 1873.77   1
  -1  29  -1 1587.24 1807.45   1
   1 -29   2 6592.72 2865.31   1
   1 -29   2 6268.00 2682.37   1
  -1  29   2 6583.57 2785.27   1
   1  29  -2 8561.62 3210.61   1
  -1 -29  -2 7011.20 3013.95   1
   1  29   2 7262.74 3052.82   1
  -1 -29   2 6320.60 2929.34   1
   1 -29  -2 5378.45 2885.89   1
  -1  29  -2 5604.84 2641.20   1
  -1  29  -2 5314.42 2321.06   1
   1 -29   3 2908.76 2341.64   1
  -1  29   3 3174.02 2430.82   1
   1  29  -3 2175.16 2218.15   1
  -1 -29  -3 2552.02 2771.55   1
   1  29   3 2993.37 2924.76   1
  -1 -29   3  827.35 2122.34   1
   1 -29  -3 2638.92 2407.96   1
  -1  29  -3 1815.00 1983.30   1
  -1  29  -3 2975.07 2126.23   1
   1 -29   4 3254.06 2465.12  -1
  -1  29   4 1367.25 2272.58  -1
   1  29  -4 6622.45 2904.18  -1
  -1 -29  -4 3391.26 3160.30  -1
   1  29   4 2169.45 2940.77  -1
  -1 -29   4 3302.08 2481.13  -1
   1 -29  -4 1519.09 2417.10  -1
  -1  29  -4 2732.68 2056.71  -1
   2   0   0 402927.  94626.   1
   2   0   0 605762. 142076.   1
  -2   0   0 427852. 100457.   1
  -2   0   0 730162. 171210.   1
   2   0   1 196387.  46147.   1
   2   0   1 175486.  41299.   1
  -2   0   1 202744.  47633.   1
  -2   0   1 220032.  51749.   1
   2   0  -1 220238.  51726.   1
   2   0  -1 220352.  51818.   1
  -2   0  -1 245140.  57603.   1
  -2   0  -1 219689.  51658.   1
   2   0   2 107843.  25383.   1
   2   0   2  82278.  19495.   1
  -2   0   2 106334.  25017.   1
  -2   0   2  83101.  19714.   1
   2   0  -2 102675.  24148.   1
   2   0  -2  89527.  21226.   1
  -2   0  -2 120009.  28241.   1
  -2   0  -2 104756.  24743.   1
   2   0   3  14807. 3933.22   1
  -2   0   3  20295. 4893.66   1
   2   0  -3  20951. 5051.45   1
   2   0  -3  35193. 8586.77   1
  -2   0  -3  53190.  12618.   1
  -2   0  -3  14654. 3869.19   1
   2   0   4 3983.53 1447.97   1
   2   0   4  30620. 7532.58   1
  -2   0  -4 7018.06 2024.70   1
   2   0   5 199131.  46856.   1
  -2   0  -5 187583.  44134.   1
   2   0   6 5369.31 1999.31   1
  -2   0  -6 4534.64 1941.00   1
   2   0   7  36748. 8970.95  -1
  -2   0  -7  54402.  13028.  -1
   2   0   8 159547.  37663.   1
  -2   0  -8 158724.  37411.   1
   2   0   9  18354. 4902.81   1
  -2   0  -9  13464. 3619.94   1
   2   0  14  15493. 5275.55   1
  -2   0 -14 -714.61 2446.83   1
   2   0  17  17107. 5522.52   1
  -2   0 -17  -45.00 2504.00   1
   2   0  18 3087.12 3302.08  -1
  -2   0 -18 -2629.8 2661.79  -1
   2   0  20 -468.10 2897.32   1
  -2   0 -20 5591.12 3178.59   1
   2   0  21 1191.40 2972.78   1
  -2   0 -21 3036.81 3139.72   1
   2   0  22 1395.15 3025.38   1
  -2   0 -22 3606.22 3043.67   1
   2   0  23  197.07 3267.78   1
  -2   0 -23 4671.85 3478.16   1
   2   0  24 -1279.2 3000.23   1
  -2   0 -24   34.99 3174.02   1
  -2   0 -25  13014. 4692.43  -1
  -2   0 -26  25383. 6992.90   1
   2   2   0 272582.  64281.   1
   2   2   0 316030.  74182.   1
  -2  -2   0 270295.  63686.   1
  -2  -2   0 302767.  71141.   1
   2  -2   0 295449.  69403.   1
   2  -2   0 282186.  66293.   1
  -2   2   0 257946.  60553.   1
   2  -2   1 265264.  62291.   1
   2  -2   1 321289.  75440.   1
  -2   2   1 253373.  59501.   1
   2   2  -1 324491.  76789.   1
   2   2  -1 176949.  41642.   1
  -2  -2  -1 261605.  61445.   1
   2   2   1 299794.  70364.   1
  -2  -2   1 208438.  49028.   1
   2  -2  -1 280128.  65790.   1
   2  -2  -1 329293.  77338.   1
  -2   2  -1 251772.  59158.   1
  -2   2  -1 305511.  71781.   1
   2  -2   2 227738.  53510.   1
   2  -2   2 309856.  72787.   1
  -2   2   2 251772.  59158.   1
   2   2  -2 210130.  49577.   1
   2   2  -2 282872.  66430.   1
  -2  -2  -2 289504.  67962.   1
   2   2   2 269609.  63366.   1
  -2  -2   2 243768.  57283.   1
   2  -2  -2 205877.  48388.   1
   2  -2  -2 185936.  43791.   1
  -2   2  -2 202172.  47519.   1
  -2   2  -2 195266.  45941.   1
   2  -2   3  31466. 7637.77   1
  -2   2   3  34073. 8111.13   1
  -2  -2  -3  35902. 8689.68   1
   2   2   3  34004. 8278.06   1
  -2  -2   3  55637.  13304.   1
   2  -2  -3  28264. 6764.23   1
   2  -2  -3  43677.  10544.   1
  -2   2  -3  51246.  12152.   1
  -2   2  -3  31054. 7605.76   1
   2  -2   4 196570.  46238.  -1
   2  -2   4 231649.  54471.  -1
  -2   2   4 262062.  61560.  -1
  -2  -2  -4 190807.  44889.  -1
   2   2   4 200091.  47084.  -1
   2  -2  -4 221312.  52024.  -1
  -2   2  -4 154608.  36382.  -1
  -2   2  -4 191059.  44981.  -1
   2  -2   5 111296.  26298.   1
   2  -2   5  96661.  22913.   1
  -2   2   5  72673.  17194.   1
  -2  -2  -5 137709.  32472.   1
   2  -2  -5 146650.  34553.   1
  -2   2  -5  91447.  21681.   1
   2  -2   6 183718.  43288.   1
   2  -2   6 140018.  33044.   1
  -2  -2  -6 179876.  42351.   1
   2   2   6 211479.  49760.   1
   2  -2  -6 216304.  50880.   1
  -2   2  -6 231877.  54562.   1
  -2   2  -6 250400.  58884.   1
   2  -2   7  99268.  23508.   1
   2  -2   7 193140.  45484.   1
  -2  -2  -7 106723.  25269.   1
   2   2   7 113400.  26801.   1
  -2   2  -7 103499.  24514.   1
  -2   2  -7 136245.  32175.   1
   2  -2   8  26618. 6585.86   1
   2  -2   8  39561. 9675.27   1
  -2  -2  -8  41367.  10043.   1
   2   2   8  35330. 8698.83   1
  -2   2  -8  28584. 7075.23   1
  -2   2  -8  34759. 8545.61   1
   2  -2   9  31877. 7928.19   1
  -2  -2  -9  64281.  15399.   1
   2   2   9  36771. 9048.70   1
  -2   2  -9  26458. 6569.85   1
  -2   2  -9  41482.  10073.   1
   2  -2  10  65607.  15735.   1
  -2  -2 -10  57718.  13945.   1
   2   2  10  67139.  16158.   1
  -2   2 -10  98742.  23439.   1
   2  -2  11 197279.  46536.   1
  -2  -2 -11 205305.  48456.   1
   2   2  11 259547.  61171.   1
  -2   2 -11 194603.  45895.   1
   2  -2  12  41688.  10414.   1
  -2  -2 -12  50995.  12573.   1
   2   2  12  52092.  12950.   1
  -2   2 -12  43426.  10688.   1
   2  -2  13  54882.  13528.   1
  -2  -2 -13  75394.  18347.   1
   2   2  13  59616.  14779.   1
  -2   2 -13  73748.  17814.   1
   2  -2  14  32563. 8575.34  -1
  -2  -2 -14  25269. 7205.57  -1
   2   2  14  32563. 8884.05  -1
  -2   2 -14  28676. 7578.31  -1
   2  -2  15  37137. 9640.97   1
  -2  -2 -15  34118. 9181.33   1
   2   2  15  37686.  10085.   1
  -2   2 -15  34233. 8893.20   1
   2  -2  16 7180.42 3533.04   1
   2   2  16  20494. 6373.19   1
  -2   2 -16 5245.82 3158.01   1
   2  -2  17  10098. 3917.22   1
  -2  -2 -17 8888.63 4036.13   1
   2   2  17  13140. 4772.46   1
  -2   2 -17  14027. 4509.49   1
   2  -2  18  42945.  10871.   1
   2   2  18  54402.  13508.   1
  -2   2 -18  30437. 8090.55   1
   2  -2  19 9382.57 3860.05   1
  -2  -2 -19 4571.23 3400.41   1
   2   2  19 4223.64 3379.83   1
  -2   2 -19 9702.71 3908.07   1
   2  -2  20  15465. 4870.79   1
  -2  -2 -20  14654. 4841.07   1
   2   2  20  16986. 5257.26   1
  -2   2 -20  17748. 5378.45   1
   2  -2  21 6382.34 3626.80   1
  -2  -2 -21 6414.35 3793.73   1
   2   2  21 9007.54 4155.04   1
  -2   2 -21  14679. 4950.83   1
   2  -2  22 7063.79 3748.00  -1
  -2  -2 -22 6496.68 3985.82  -1
   2   2  22 3567.34 3624.51  -1
  -2   2 -22 9876.50 4296.82  -1
   2  -2  23  16254. 5154.35  -1
  -2  -2 -23  14532. 5280.12  -1
   2   2  23  12509. 4735.88  -1
  -2   2 -23  18450. 5790.07  -1
   2  -2  24 1517.03 2872.17   1
  -2  -2 -24  138.83 3212.89   1
  -2   2 -24 1422.59 2853.87   1
   2  -2  25  16529. 5181.79   1
  -2   2 -25  20686. 5899.83   1
   2  -2  26  13236. 4507.20   1
  -2   2 -26  12829. 4376.85   1
  -2   2 -27  939.63 2874.45   1
   2   4   0  14162. 3768.58   1
  -2  -4   0  33021. 7836.72   1
   2  -4   0  14054. 3487.31   1
   2  -4   0 3677.11 1956.09   1
  -2   4   0  19719. 4795.33   1
  -2   4   0 4822.77 2009.15   1
   2  -4   1  69540.  16440.   1
   2  -4   1  73245.  17430.   1
  -2   4   1 101280.  23874.   1
  -2   4   1  61056.  14622.   1
   2   4  -1  90121.  21297.   1
   2   4  -1  52184.  12504.   1
   2   4   1  99200.  23439.   1
  -2  -4   1  84587.  19984.   1
  -2  -4   1  50537.  12079.   1
   2  -4  -1  73885.  17459.   1
   2  -4  -1  51818.  12451.   1
  -2   4  -1  87331.  20611.   1
  -2   4  -1  79876.  18994.   1
   2  -4   2 109307.  25749.   1
   2  -4   2 112440.  26572.   1
  -2   4   2 136245.  32083.   1
  -2   4   2  95449.  22621.   1
   2   4  -2 121564.  28653.   1
   2   4  -2 109559.  25886.   1
  -2  -4  -2  90418.  21372.   1
   2   4   2  61148.  14557.   1
  -2  -4   2 114658.  27052.   1
  -2  -4   2  92545.  21891.   1
   2  -4  -2 102355.  24125.   1
   2  -4  -2  83192.  19783.   1
  -2   4  -2 108004.  25452.   1
  -2   4  -2  89298.  21157.   1
   2  -4   3  95586.  22552.   1
   2  -4   3 116236.  27464.   1
  -2   4   3 113903.  26847.   1
  -2   4   3 125154.  29591.   1
   2   4  -3  83741.  19748.   1
   2   4  -3 112646.  26618.   1
  -2  -4  -3 109307.  25795.   1
   2   4   3 157832.  37160.   1
  -2  -4   3 103567.  24468.   1
  -2  -4   3  70798.  16705.   1
   2  -4  -3 116853.  27533.   1
   2  -4  -3  91516.  21717.   1
  -2   4  -3 116190.  27372.   1
  -2   4  -3 113560.  26824.   1
   2  -4   4 203270.  47816.   1
   2  -4   4 182712.  43014.   1
  -2   4   4 145827.  34347.   1
  -2  -4  -4 225131.  52916.   1
   2   4   4 230276.  54128.   1
   2  -4  -4 183855.  43243.   1
  -2   4  -4 220718.  51909.   1
  -2   4  -4 261605.  61491.   1
   2  -4   5 169151.  39835.   1
   2  -4   5 152824.  36016.   1
  -2   4   5 148068.  34896.   1
  -2  -4  -5  99085.  23439.   1
   2   4   5  93826.  22225.   1
   2  -4  -5 146581.  34553.   1
  -2   4  -5 105968.  25017.   1
  -2   4  -5 100183.  23714.   1
   2  -4   6  77521.  18406.   1
   2  -4   6  78642.  18687.   1
  -2   4   6  66659.  15850.   1
  -2  -4  -6  83375.  19787.   1
   2   4   6  98468.  23348.   1
   2  -4  -6  70821.  16853.   1
  -2   4  -6 176035.  41459.   1
  -2   4  -6  88063.  20887.   1
   2  -4   7  26366. 6576.71   1
   2  -4   7  14777. 3990.39   1
  -2   4   7  20000. 5010.29   1
  -2  -4  -7  20425. 5264.12   1
   2   4   7  17905. 4742.73   1
   2  -4  -7  62474.  14917.   1
  -2   4  -7  27578. 6867.13   1
  -2   4  -7  10979. 3201.46   1
   2  -4   8 186554.  44020.   1
   2  -4   8 108004.  25589.   1
  -2  -4  -8 136428.  32220.   1
   2   4   8 116648.  27647.   1
   2  -4  -8 115184.  27235.   1
  -2   4  -8 165927.  39195.   1
  -2   4  -8 106677.  25269.   1
   2  -4   9  76698.  18301.   1
  -2  -4  -9  28584. 7242.16   1
   2   4   9  28356. 7228.44   1
  -2   4  -9  49646.  12033.   1
   2  -4  10  43128.  10492.   1
   2  -4  10  46307.  11239.   1
  -2  -4 -10  50537.  12362.   1
   2   4  10  54288.  13302.   1
  -2   4 -10  41939.  10261.   1
  -2   4 -10  48594.  11784.   1
   2  -4  11  35742. 8785.72   1
   2  -4  11  37320. 9208.77   1
  -2  -4 -11  52047.  12879.   1
   2   4  11  49691.  12399.   1
  -2   4 -11  30482. 7653.78   1
  -2   4 -11  40613. 9965.69   1
   2  -4  12  17331. 4614.68   1
   2  -4  12  27235. 7066.08   1
  -2  -4 -12  44294.  11146.   1
   2   4  12  46353.  11811.   1
  -2   4 -12  28127. 7127.82   1
  -2   4 -12  26915. 6892.29   1
   2  -4  13  29522. 7701.80   1
  -2  -4 -13  38303.  10023.   1
   2   4  13  43586.  11214.   1
  -2   4 -13  25566. 6562.99   1
  -2   4 -13  39172. 9807.90   1
   2  -4  14 105831.  25360.   1
  -2  -4 -14 140041.  33478.   1
   2   4  14 114910.  27647.   1
  -2   4 -14  88109.  21201.   1
   2  -4  15  53785.  13371.   1
  -2  -4 -15  37183. 9910.81   1
   2   4  15  39630.  10460.   1
  -2   4 -15  35033. 9076.14   1
   2  -4  16  78802.  19069.   1
  -2  -4 -16  54928.  13718.   1
   2   4  16  35651. 9426.01   1
  -2   4 -16  48045.  11976.   1
   2  -4  17 7091.23 3432.42   1
  -2  -4 -17  13663. 4653.55   1
   2   4  17 4884.51 3368.39   1
  -2   4 -17  11521. 4145.89   1
   2  -4  18  40293.  10135.   1
  -2  -4 -18  29202. 7875.59   1
   2   4  18  31306. 8289.50   1
  -2   4 -18  47404.  11763.   1
   2  -4  19  23096. 6412.07  -1
  -2  -4 -19  19993. 5844.95  -1
   2   4  19  11061. 4189.34  -1
   2  -4  20  19426. 5806.08   1
  -2  -4 -20  10167. 4283.10   1
   2   4  20  11649. 4427.16   1
  -2   4 -20  19154. 5726.04   1
   2  -4  21  20617. 5995.88   1
  -2  -4 -21  15250. 5124.62   1
   2   4  21  12044. 4445.46   1
  -2   4 -21  28081. 7688.08   1
   2  -4  22  15205. 5058.31   1
  -2  -4 -22 4427.16 3503.31   1
   2   4  22 6306.88 3103.13   1
  -2   4 -22  10544. 4139.03   1
   2  -4  23 9554.07 4061.28   1
  -2  -4 -23 9913.09 3750.28   1
  -2   4 -23 9158.46 4113.88   1
   2  -4  24  27967. 7466.26   1
  -2   4 -24  33958. 8941.22   1
   2  -4  25  13211. 4262.52   1
  -2   4 -25 8886.34 3834.89   1
   2  -4  26 4708.43 2977.36   1
  -2   4 -26 7143.83 3635.94   1
   2  -4  27  10444. 3555.91   1
  -2   4 -27 5330.43 3416.42   1
  -2   4 -28 2606.90 3279.21  -1
   2   6   0 467642. 109810.   1
   2   6   0 569860. 133638.   1
  -2  -6   0 434713. 102104.   1
  -2  -6   0 599588. 140590.   1
   2  -6   0 461239. 108324.   1
   2  -6   0 587697. 137869.   1
  -2   6   0 396295.  93094.   1
  -2   6   0 440887. 103476.   1
   2  -6   1  67940.  16204.  -1
  -2   6   1  51269.  12362.  -1
   2   6  -1  76309.  17983.  -1
   2   6  -1  72605.  17235.  -1
  -2  -6  -1  50537.  11996.  -1
  -2  -6  -1  59341.  14096.  -1
   2   6   1  88086.  20830.  -1
  -2  -6   1  69700.  16545.  -1
  -2  -6   1 101509.  23897.  -1
   2  -6  -1  56917.  13528.  -1
   2  -6  -1  50652.  12211.  -1
  -2   6  -1 128859.  30391.  -1
  -2   6  -1  51086.  12284.  -1
   2  -6   2  10789. 2810.43   1
   2  -6   2  19163. 4957.69   1
  -2   6   2 8092.83 2248.11   1
  -2   6   2  12550. 3553.62   1
   2   6  -2  13051. 3610.79   1
   2   6  -2  20597. 4930.25   1
  -2  -6  -2  11386. 3109.99   1
   2   6   2 9817.05 2840.15   1
  -2  -6   2  13791. 3338.67   1
  -2  -6   2 8856.61 2668.65   1
   2  -6  -2 9094.43 2481.13   1
   2  -6  -2  12264. 3530.75   1
  -2   6  -2  18587. 4621.54   1
   2  -6   3 337983.  79396.   1
   2  -6   3 458952. 107683.   1
  -2   6   3 462154. 108530.   1
  -2   6   3 447518. 105054.   1
   2   6  -3 331351.  77818.   1
   2   6  -3 568945. 133455.   1
  -2  -6  -3 543334. 127418.   1
   2   6   3 545620. 127967.   1
  -2  -6   3 475188. 111457.   1
  -2  -6   3 382803.  89892.   1
   2  -6  -3 443174. 104070.   1
   2  -6  -3 552709. 129682.   1
  -2   6  -3 378916.  89001.   1
  -2   6  -3 501257. 117585.   1
   2  -6   4  91653.  21667.   1
   2  -6   4 126549.  29888.   1
  -2   6   4 117173.  27647.   1
   2   6  -4 106586.  25177.   1
   2   6  -4 103110.  24285.   1
  -2  -6  -4 225406.  52984.   1
   2   6   4 152618.  35971.   1
  -2  -6   4 111914.  26343.   1
   2  -6  -4 102996.  24331.   1
  -2   6  -4 120947.  28539.   1
  -2   6  -4 110359.  26069.   1
   2  -6   5 434255. 102012.   1
   2  -6   5 504459. 118340.   1
  -2   6   5 490967. 115298.   1
   2   6  -5 475646. 111731.   1
  -2  -6  -5 529384. 124171.   1
   2   6   5 589069. 138166.   1
  -2  -6   5 554310. 130208.   1
   2  -6  -5 450720. 105900.   1
  -2   6  -5 493254. 115824.   1
  -2   6  -5 549050. 128790.   1
   2  -6   6 188086.  44294.   1
   2  -6   6 160325.  37800.   1
  -2   6   6 151726.  35788.   1
   2   6  -6 181934.  42854.   1
  -2  -6  -6 155568.  36657.   1
   2   6   6 208141.  48982.   1
  -2  -6   6 223393.  52573.   1
   2  -6  -6 171118.  40338.   1
  -2   6  -6 258404.  60782.   1
  -2   6  -6 142968.  33730.   1
   2  -6   7 129408.  30551.   1
   2  -6   7 183444.  43220.   1
  -2   6   7 186554.  43974.   1
   2   6  -7 100091.  23668.   1
  -2  -6  -7 149966.  35353.   1
   2   6   7 154242.  36382.   1
  -2  -6   7 104894.  24788.   1
   2  -6  -7 183924.  43380.   1
  -2   6  -7 111845.  26458.   1
  -2   6  -7 158335.  37320.   1
   2  -6   8  22788. 5698.60   1
   2  -6   8  35513. 8733.13   1
  -2   6   8  26275. 6556.13   1
  -2  -6  -8  24971. 6334.32   1
   2   6   8  25429. 6535.55   1
   2  -6  -8  51772.  12481.   1
  -2   6  -8  26000. 6514.97   1
   2  -6   9  87354.  20777.   1
   2  -6   9  71324.  17068.   1
  -2   6   9  46558.  11251.   1
  -2  -6  -9  75577.  18086.   1
   2   6   9  50400.  12348.   1
   2  -6  -9  72307.  17267.   1
  -2   6  -9  87286.  20766.   1
  -2   6  -9  57352.  13762.   1
   2  -6  10  12378. 3603.93   1
   2  -6  10  18667. 4966.84   1
  -2  -6 -10  16250. 4834.21   1
   2   6  10  17425. 5163.50   1
   2  -6 -10  30048. 7454.83   1
  -2   6 -10  18678. 5040.01   1
  -2   6 -10  13341. 3832.61   1
   2  -6  11  37183. 9188.19   1
  -2  -6 -11  45758.  11486.   1
   2   6  11  38943.  10078.   1
  -2   6 -11  30643. 7676.65   1
   2  -6  12 143768.  34073.   1
   2  -6  12  77155.  18495.   1
  -2  -6 -12  96387.  23211.   1
   2   6  12 110610.  26549.   1
  -2   6 -12  73108.  17597.   1
  -2   6 -12 100091.  23828.   1
   2  -6  13  13153. 3791.44  -1
   2  -6  13  10149. 3640.52  -1
  -2  -6 -13  22291. 6798.53  -1
   2   6  13 9622.67 4518.63  -1
  -2   6 -13  25063. 6530.98  -1
  -2   6 -13 8191.17 3128.28  -1
   2  -6  14  21301. 5561.39  -1
   2  -6  14  56506.  13803.  -1
  -2  -6 -14  30162. 8424.41  -1
   2   6  14  26023. 7525.72  -1
  -2   6 -14  31260. 7973.92  -1
  -2   6 -14  30528. 7786.41  -1
   2  -6  15  10885. 3190.03   1
   2  -6  15  17119. 5168.07   1
  -2  -6 -15  13462. 4937.11   1
   2   6  15  11630. 4598.67   1
  -2   6 -15  16933. 4623.82   1
  -2   6 -15  21431. 5977.58   1
   2  -6  16 3448.43 1729.25   1
   2  -6  16  10460. 3933.22   1
  -2  -6 -16  15909. 5161.21   1
   2   6  16 6114.79 3571.92   1
  -2   6 -16 8241.47 2819.57   1
  -2   6 -16 5156.64 3071.12   1
   2  -6  17  19984. 5806.08   1
  -2  -6 -17  25932. 7045.50   1
   2   6  17  19284. 5876.97   1
  -2   6 -17  23005. 5906.69   1
  -2   6 -17  35673. 9147.03   1
   2  -6  18  21893. 6199.40   1
  -2  -6 -18  20858. 6085.06   1
   2   6  18  16986. 5261.83   1
  -2   6 -18  18239. 5440.20   1
   2  -6  19  11962. 4305.96   1
  -2  -6 -19 8287.21 3850.90   1
   2   6  19 7569.17 3919.50   1
  -2   6 -19  12083. 4150.46   1
   2  -6  20  49280.  12316.   1
  -2  -6 -20  25109. 6931.16   1
   2   6  20  23965. 6761.94   1
  -2   6 -20  41024.  10524.   1
   2  -6  21 3126.00 3297.50   1
  -2  -6 -21 2257.72 3276.92   1
  -2   6 -21 4134.46 3338.67   1
   2  -6  22  12040. 4356.27  -1
  -2   6 -22 6574.43 3841.75  -1
   2  -6  23 1944.66 2840.15   1
  -2   6 -23 6617.88 3382.11   1
   2  -6  24  830.09 2762.40   1
  -2   6 -24  392.18 2650.35   1
   2  -6  25  23851. 6601.87   1
  -2   6 -25  31283. 8257.48   1
   2  -6  26 3752.57 3000.23   1
  -2   6 -26 -155.29 2961.35   1
   2  -6  27 8463.29 3565.05   1
  -2   6 -27 7070.65 3599.36   1
   2  -6  28 6160.52 3453.00   1
  -2   6 -28 1170.82 3208.32   1
  -2   6 -29  344.39 3162.59  -1
  -2   6 -30 1910.13 2423.96   1
   2   8   0  40750. 9711.86   1
   2   8   0  59593.  14182.   1
  -2  -8   0  54105.  12845.   1
  -2  -8   0  82323.  19472.   1
   2  -8   0  34301. 8282.64   1
   2  -8   0  51932.  12554.   1
  -2   8   0  53739.  12824.   1
  -2   8   0  62223.  14933.   1
   2  -8   1 196410.  46238.  -1
   2  -8   1 202607.  47725.  -1
  -2   8   1 173702.  40933.  -1
  -2   8   1 145369.  34324.  -1
   2   8  -1 180700.  42488.  -1
   2   8  -1 192545.  45278.  -1
  -2  -8  -1 136794.  32198.  -1
  -2  -8  -1 131672.  31008.  -1
   2   8   1 161011.  37892.  -1
   2   8   1 162931.  38326.  -1
  -2  -8   1 157100.  36977.  -1
  -2  -8   1 181408.  42671.  -1
   2  -8  -1 165035.  38875.  -1
   2  -8  -1 304139.  71530.  -1
  -2   8  -1 166682.  39286.  -1
  -2   8  -1 151315.  35696.  -1
   2  -8   2 307569.  72307.   1
   2  -8   2 340727.  80059.   1
  -2   8   2 279670.  65767.   1
  -2   8   2 233935.  55065.   1
   2   8  -2 321518.  75532.   1
   2   8  -2 335925.  78847.   1
  -2  -8  -2 383489.  90098.   1
  -2  -8  -2 267322.  62771.   1
   2   8   2 250400.  58815.   1
   2   8   2 345758.  81294.   1
  -2  -8   2 321289.  75486.   1
  -2  -8   2 283329.  66545.   1
   2  -8  -2 265950.  62566.   1
   2  -8  -2 259547.  61034.   1
  -2   8  -2 374800.  88086.   1
  -2   8  -2 298879.  70226.   1
   2  -8   3 237823.  55934.   1
   2  -8   3 246741.  58015.   1
  -2   8   3 243082.  57192.   1
   2   8  -3 398582.  93506.   1
   2   8  -3 264578.  62154.   1
  -2  -8  -3 271667.  63801.   1
  -2  -8  -3 235079.  55317.   1
   2   8   3 273039.  64144.   1
   2   8   3 258861.  60896.   1
  -2  -8   3 246284.  57878.   1
  -2  -8   3 243768.  57238.   1
   2  -8  -3 305739.  71896.   1
   2  -8  -3 201761.  47519.   1
  -2   8  -3 245826.  57832.   1
  -2   8  -3 221267.  52047.   1
   2  -8   4 234621.  55157.  -1
   2  -8   4 221678.  52138.  -1
  -2   8   4 233021.  54836.  -1
   2   8  -4 169609.  39927.  -1
   2   8  -4 214384.  50377.  -1
  -2  -8  -4 137388.  32426.  -1
  -2  -8  -4 226435.  53213.  -1
   2   8   4 254973.  59890.  -1
  -2  -8   4 197004.  46307.  -1
   2  -8  -4 231877.  54562.  -1
  -2   8  -4 255659.  60142.  -1
  -2   8  -4 222456.  52321.  -1
   2  -8   5 171415.  40384.   1
   2  -8   5 179190.  42214.   1
  -2   8   5 164532.  38783.   1
   2   8  -5 147564.  34713.   1
  -2  -8  -5 160782.  37869.   1
   2   8   5 162062.  38166.   1
  -2  -8   5 156254.  36771.   1
   2  -8  -5 143837.  33935.   1
  -2   8  -5 101692.  24057.   1
  -2   8  -5 140041.  33044.   1
   2  -8   6  59227.  14114.   1
   2  -8   6  45735.  11056.   1
  -2   8   6  44409.  10695.   1
   2   8  -6  63823.  15106.   1
  -2  -8  -6  52390.  12547.   1
   2   8   6  56963.  13650.   1
   2  -8  -6  41024. 9908.52   1
  -2   8  -6  48502.  11637.   1
  -2   8  -6  65721.  15683.   1
   2  -8   7 134553.  31763.   1
   2  -8   7 100777.  23897.   1
  -2   8   7 121999.  28882.   1
   2   8  -7  97370.  23005.   1
  -2  -8  -7  79007.  18788.   1
   2   8   7  96821.  22982.   1
  -2  -8   7  91653.  21692.   1
  -2   8  -7  70341.  16744.   1
  -2   8  -7  73428.  17485.   1
   2  -8   8  27624. 6775.66   1
   2  -8   8  21784. 5604.84   1
  -2   8   8  30803. 7633.20   1
   2   8  -8  26847. 6617.88   1
  -2  -8  -8  24903. 6357.19   1
   2   8   8  15651. 4459.18   1
  -2  -8   8  28882. 7132.40   1
   2  -8  -8  40407. 9871.93   1
  -2   8  -8  21031. 5302.99   1
  -2   8  -8  23073. 5847.24   1
   2  -8   9 199245.  46947.   1
   2  -8   9 160805.  37960.   1
  -2   8   9 139607.  33044.   1
   2   8  -9 123050.  29110.   1
  -2  -8  -9 130963.  31054.   1
   2   8   9 185067.  43791.   1
  -2  -8   9 228904.  53899.   1
   2  -8  -9 150903.  35696.   1
  -2   8  -9 116693.  27624.   1
  -2   8  -9 138532.  32746.   1
   2  -8  10  43517.  10535.   1
   2  -8  10  76126.  18212.   1
  -2   8  10  77338.  18493.   1
   2   8 -10  54265.  13028.   1
  -2  -8 -10  84267.  20313.   1
   2   8  10  81020.  19616.   1
  -2  -8  10  49188.  11855.   1
   2  -8 -10  64487.  15539.   1
  -2   8 -10  47862.  11573.   1
  -2   8 -10  70981.  17007.   1
   2  -8  11  59799.  14375.   1
   2  -8  11  53807.  13044.   1
  -2   8  11  45232.  11038.   1
   2   8 -11  49737.  11994.   1
  -2  -8 -11  58724.  14535.   1
   2   8  11 124880.  29911.   1
  -2  -8  11  45552.  10995.   1
   2  -8 -11  45987.  11269.   1
  -2   8 -11  64075.  15390.   1
  -2   8 -11  59090.  14258.   1
   2  -8  12  59730.  14407.   1
   2   8 -12  69037.  16481.   1
  -2  -8 -12  53236.  13330.   1
   2   8  12  51178.  12959.   1
   2  -8 -12  46558.  11415.   1
  -2   8 -12  32175. 8117.99   1
  -2   8 -12  75303.  18024.   1
   2  -8  13  14365. 4006.40   1
   2  -8  13  24445. 6409.78   1
  -2  -8 -13  18411. 5808.36   1
   2   8  13  27601. 7699.51   1
  -2   8 -13  25543. 6576.71   1
  -2   8 -13  14493. 4251.08   1
   2  -8  14  21070. 5444.77   1
   2  -8  14  29156. 7544.01   1
  -2  -8 -14  23531. 6743.65   1
   2   8  14  27738. 7621.76   1
  -2   8 -14  28927. 7299.33   1
  -2   8 -14  34896. 8760.57   1
   2  -8  15  79053.  18879.  -1
   2  -8  15  22959. 6286.30  -1
  -2  -8 -15  21489. 6316.02  -1
   2   8  15  13794. 4804.48  -1
  -2   8 -15  52801.  12815.  -1
  -2   8 -15  13323. 4189.34  -1
   2  -8  16 3096.27 1739.54   1
   2  -8  16  11630. 4175.62   1
  -2  -8 -16  354.68 3114.56   1
   2   8  16  996.34 2851.59   1
  -2   8 -16 3372.97 1984.22   1
  -2   8 -16  15445. 4676.42   1
   2  -8  17  29019. 7217.01   1
   2  -8  17  33295. 8520.46   1
  -2  -8 -17  14759. 4861.65   1
   2   8  17  41505.  10478.   1
  -2   8 -17  30071. 7491.42   1
  -2   8 -17  37320. 9451.17   1
   2  -8  18  40567. 9858.21   1
   2  -8  18  41070.  10389.   1
  -2  -8 -18  36451. 9551.79   1
   2   8  18  35330. 9192.76   1
  -2   8 -18  50080.  12097.   1
  -2   8 -18  74411.  18065.   1
   2  -8  19  17690. 4642.12   1
  -2  -8 -19  13903. 4921.10   1
   2   8  19  12760. 4532.35   1
  -2   8 -19  19319. 5028.58   1
  -2   8 -19  40498.  10466.   1
   2  -8  20  51749.  12518.   1
   2  -8  20  91082.  22031.   1
  -2  -8 -20  51635.  13009.   1
  -2   8 -20  64875.  15605.   1
  -2   8 -20  96844.  23325.   1
   2  -8  21  13051. 3738.85  -1
   2  -8  21  28470. 7877.88  -1
  -2   8 -21  25292. 6464.66  -1
  -2   8 -21  18957. 5870.11  -1
   2  -8  22 4550.65 3174.02   1
  -2   8 -22 2055.11 1619.94   1
  -2   8 -22  -63.48 2636.63   1
   2  -8  23 5851.81 3153.44   1
  -2   8 -23  18795. 5632.28   1
   2  -8  24 9670.70 3736.56   1
  -2   8 -24 9160.75 3830.32   1
   2  -8  25  498.51 2764.69   1
  -2   8 -25 2851.59 2924.76   1
   2  -8  26  13958. 4584.95   1
  -2   8 -26 6414.35 3199.17   1
   2  -8  27 7827.57 3695.40   1
  -2   8 -27 6428.08 3315.80   1
   2  -8  28 3071.12 3155.73   1
  -2   8 -28  434.48 2826.43   1
   2  -8  29 3727.41 3180.88   1
  -2   8 -29 1841.53 2828.72   1
  -2   8 -30   45.39 2620.62   1
  -2   8 -31 -447.75 2545.16   1
   2  10   0 287903.  67688.   1
   2  10   0 265264.  62268.   1
  -2 -10   0 327006.  76881.   1
  -2 -10   0 225520.  52984.   1
   2 -10   0 280814.  66064.   1
   2 -10   0 299337.  70364.   1
  -2  10   0 315344.  74160.   1
  -2  10   0 314658.  73954.   1
   2 -10   1 254516.  59890.   1
   2 -10   1 239881.  56437.   1
  -2  10   1 152046.  35902.   1
  -2  10   1 236222.  55614.   1
   2  10  -1 210908.  49554.   1
   2  10  -1 243997.  57329.   1
  -2 -10  -1 246512.  58015.   1
  -2 -10  -1 197233.  46353.   1
   2  10   1 203110.  47725.   1
   2  10   1 189801.  44660.   1
  -2 -10   1 214429.  50446.   1
  -2 -10   1 210290.  49417.   1
   2 -10  -1 194649.  45872.   1
   2 -10  -1 254059.  59799.   1
  -2  10  -1 237823.  56003.   1
  -2  10  -1 206083.  48525.   1
   2 -10   2 148685.  35079.   1
   2 -10   2 168328.  39698.   1
  -2  10   2 146147.  34507.   1
  -2  10   2 151452.  35765.   1
   2  10  -2 175806.  41367.   1
   2  10  -2 187880.  44180.   1
  -2 -10  -2 118294.  27876.   1
  -2 -10  -2 169723.  39995.   1
   2  10   2 175509.  41322.   1
   2  10   2 151749.  35719.   1
  -2 -10   2 179145.  42168.   1
  -2 -10   2 146352.  34461.   1
   2 -10  -2 174205.  41093.   1
   2 -10  -2 142191.  33615.   1
  -2  10  -2 163800.  38646.   1
  -2  10  -2 144775.  34164.   1
   2 -10   3 265950.  62543.   1
   2 -10   3 244912.  57581.   1
  -2  10   3 289504.  68145.   1
   2  10  -3 221221.  52024.   1
   2  10  -3 268694.  63137.   1
  -2 -10  -3 421907.  99017.   1
  -2 -10  -3 324262.  76263.   1
   2  10   3 271667.  63801.   1
   2  10   3 291104.  68466.   1
  -2 -10   3 272582.  64052.   1
  -2 -10   3 230048.  54082.   1
   2 -10  -3 286988.  67505.   1
  -2  10  -3 287674.  67665.   1
  -2  10  -3 301623.  70889.   1
   2 -10   4 148228.  34965.   1
   2 -10   4 135490.  31992.   1
  -2  10   4 167642.  39561.   1
   2  10  -4 158472.  37297.   1
   2  10  -4 118957.  28059.   1
  -2 -10  -4 130002.  30665.   1
  -2 -10  -4 165172.  39012.   1
   2  10   4 141184.  33364.   1
   2  10   4 158724.  37366.   1
  -2 -10   4 165172.  38852.   1
  -2 -10   4 102858.  24285.   1
   2 -10  -4 153945.  36337.   1
  -2  10  -4 179716.  42351.   1
  -2  10  -4 146398.  34530.   1
   2 -10   5  27738. 6796.24   1
   2 -10   5  32655. 8079.11   1
  -2  10   5  53785.  12916.   1
   2  10  -5  25383. 6123.94   1
  -2 -10  -5  51818.  12401.   1
   2  10   5  57398.  13755.   1
   2  10   5  25749. 6430.36   1
  -2 -10   5  38761. 9245.36   1
   2 -10  -5  49531.  11916.   1
  -2  10  -5  27716. 6814.54   1
  -2  10  -5  40384. 9771.31   1
   2 -10   6 353533.  83078.   1
   2 -10   6 483421. 113446.   1
  -2  10   6 434027. 102035.   1
   2  10  -6 393094.  92316.   1
  -2 -10  -6 490509. 115070.   1
  -2 -10  -6 236679.  55774.   1
   2  10   6 470157. 110336.   1
  -2 -10   6 383718.  90144.   1
   2 -10  -6 404756.  95129.   1
  -2  10  -6 356277.  83787.   1
  -2  10  -6 522981. 122707.   1
   2 -10   7 180471.  42534.   1
   2 -10   7 138898.  32815.   1
  -2  10   7 173999.  41093.   1
   2  10  -7 163069.  38395.   1
  -2 -10  -7 136382.  32198.   1
   2  10   7 119300.  28264.   1
  -2 -10   7 176538.  41550.   1
   2 -10  -7 133844.  31649.   1
  -2  10  -7 151818.  35833.   1
  -2  10  -7 124605.  29453.   1
   2 -10   8  61377.  14656.   1
  -2  10   8  70844.  17002.   1
   2  10  -8  50697.  12083.   1
  -2 -10  -8  58152.  14080.   1
   2  10   8  59456.  14441.   1
  -2 -10   8 109101.  25772.   1
   2 -10  -8  81980.  19602.   1
  -2  10  -8  90350.  21457.   1
  -2  10  -8  81843.  19485.   1
   2 -10   9  36405. 8858.90  -1
   2 -10   9  17039. 4596.38  -1
  -2  10   9  30825. 7797.84  -1
   2  10  -9  34187. 8291.78  -1
  -2 -10  -9  35696. 9094.43  -1
   2  10   9  23279. 6592.72  -1
  -2 -10   9  28790. 7072.94  -1
   2 -10  -9  27190. 7061.51  -1
  -2  10  -9  47427.  11457.  -1
   2 -10  10  12954. 3533.04   1
   2 -10  10 9588.37 3077.98   1
  -2  10  10 9819.34 3276.92   1
   2  10 -10  13089. 3551.33   1
  -2 -10 -10  12785. 4427.16   1
   2  10  10  11050. 4257.94   1
  -2 -10  10  23302. 5874.68   1
   2 -10 -10 8424.41 3281.50   1
  -2  10 -10  13343. 3690.83   1
  -2  10 -10 7203.29 2627.48   1
   2 -10  11  37869. 9195.05   1
   2 -10  11  23211. 5986.73   1
   2  10 -11  28219. 6970.04   1
  -2 -10 -11  32472. 8563.91   1
   2  10  11  32152. 8472.44   1
  -2 -10  11  27601. 6832.83   1
   2 -10 -11  35445. 9048.70   1
  -2  10 -11  20892. 5323.57   1
  -2  10 -11  39355. 9643.26   1
   2 -10  12  34073. 8332.94   1
   2 -10  12  21530. 5646.00   1
   2  10 -12  56460.  13535.   1
  -2 -10 -12  36405. 9419.15   1
   2  10  12  33844. 8886.34   1
  -2 -10  12  40864. 9867.36   1
   2 -10 -12  43517.  10970.   1
  -2  10 -12  69380.  16577.   1
  -2  10 -12  20837. 5467.64   1
   2 -10  13  29728. 7345.07   1
   2 -10  13  50926.  12348.   1
  -2  10  13  41116.  10302.   1
   2  10 -13  36039. 8813.16   1
  -2 -10 -13  34827. 9057.85   1
   2  10  13  38075. 9785.04   1
  -2 -10  13  28699. 7091.23   1
   2 -10 -13  28356. 7651.49   1
  -2  10 -13  50423.  12182.   1
  -2  10 -13  27784. 7054.65   1
   2 -10  14  91356.  21736.   1
   2 -10  14  61880.  14930.   1
   2  10 -14  72696.  17338.   1
  -2 -10 -14  55637.  13741.   1
   2  10  14  93483.  22490.   1
  -2 -10  14  73199.  17437.   1
   2 -10 -14  49463.  12369.   1
  -2  10 -14  73130.  17489.   1
  -2  10 -14  91127.  21699.   1
   2 -10  15  12758. 3549.05   1
   2 -10  15  14690. 4420.30   1
   2  10 -15  12127. 3388.97   1
  -2 -10 -15  12028. 4180.19   1
   2  10  15  12538. 4395.15   1
  -2 -10  15  15740. 4109.30   1
  -2  10 -15  33158. 8182.02   1
  -2  10 -15  19764. 5291.56   1
   2 -10  16  17738. 4683.28   1
   2 -10  16  16103. 4831.92   1
   2  10 -16  25452. 6366.33   1
  -2 -10 -16  15893. 5010.29   1
   2  10  16  11669. 4143.60   1
  -2  10 -16  23119. 5879.25   1
  -2  10 -16  14295. 4347.13   1
   2 -10  17  38898. 9490.04   1
   2 -10  17  65630.  16014.   1
  -2 -10 -17  30460. 8124.85   1
   2  10  17  26801. 7326.77   1
  -2  10 -17  33753. 8332.94   1
  -2  10 -17  46330.  11468.   1
   2 -10  18  23256. 5943.28   1
   2 -10  18 9817.05 4006.40   1
  -2 -10 -18 3793.73 3338.67   1
   2  10  18 4164.19 2561.17   1
  -2  10 -18  10567. 3242.62   1
  -2  10 -18 7589.75 3393.55   1
   2 -10  19 5396.75 2330.21   1
   2 -10  19 4075.00 3254.06   1
  -2 -10 -19 2075.00 2931.62   1
  -2  10 -19 3512.46 2041.62   1
  -2  10 -19 2943.06 3043.67   1
   2 -10  20  38692. 9558.65   1
   2 -10  20  35536. 9291.10   1
  -2  10 -20  34461. 8643.94   1
  -2  10 -20  35879. 9377.99   1
   2 -10  21  27212. 6944.88   1
   2 -10  21  22188. 6336.60   1
  -2  10 -21  26549. 6803.10   1
  -2  10 -21  28150. 7546.30   1
   2 -10  22  89961.  21500.   1
   2 -10  22  66179.  16060.   1
  -2  10 -22  90556.  21660.   1
  -2  10 -22  71095.  17334.   1
   2 -10  23 1401.32 1812.71   1
   2 -10  23 1909.67 2828.72   1
  -2  10 -23 1816.60 2059.68   1
  -2  10 -23 2728.10 3283.78   1
   2 -10  24  15630. 4363.13   1
   2 -10  24  15209. 4747.31   1
  -2  10 -24  10869. 3494.17   1
  -2  10 -24 9394.00 4022.41   1
   2 -10  25 3555.91 1986.73   1
   2 -10  25 5735.19 3013.95   1
  -2  10 -25 4328.83 2398.81   1
  -2  10 -25 3869.19 3375.25   1
   2 -10  26  10922. 4150.46  -1
  -2  10 -26  11214. 3539.90  -1
  -2  10 -26  10773. 4404.29  -1
   2 -10  27  915.85 2959.06   1
  -2  10 -27 -560.03 3055.11   1
   2 -10  28 2318.77 2972.78   1
  -2  10 -28 -387.83 2815.00   1
   2 -10  29 3693.11 3016.23  -1
  -2  10 -29 1876.28 2833.29  -1
   2 -10  30 3649.67 2849.30   1
  -2  10 -30 3635.94 2897.32   1
  -2  10 -31 1540.36 2675.51   1
  -2  10 -32 -444.55 2641.20   1
  -2  10 -33  160.96 2045.05   1
   2  12   0 9622.67 2648.07   1
   2  12   0  30162. 7287.90   1
  -2 -12   0 6551.56 1950.15   1
  -2 -12   0  21473. 5289.27   1
   2 -12   0  12394. 3597.07   1
  -2  12   0  14951. 3919.50   1
  -2  12   0  12474. 3594.78   1
   2 -12   1  31557. 7688.08   1
   2 -12   1  35559. 8758.28   1
  -2  12   1  82392.  19579.   1
  -2  12   1  50377.  12156.   1
   2  12  -1  57009.  13554.   1
   2  12  -1  31283. 7544.01   1
  -2 -12  -1  37503. 9080.71   1
  -2 -12  -1  33638. 8101.98   1
   2  12   1  40064. 9590.66   1
   2  12   1  31077. 7555.45   1
  -2 -12   1  33341. 8040.24   1
  -2 -12   1  41299. 9915.38   1
   2 -12  -1  31580. 7697.23   1
   2 -12  -1  41276.  10119.   1
  -2  12  -1  35147. 8541.04   1
  -2  12  -1  49668.  11987.   1
   2 -12   2  98216.  23256.   1
   2 -12   2 123485.  29202.   1
  -2  12   2 210793.  49668.   1
  -2  12   2 151909.  35856.   1
   2  12  -2 158701.  37388.   1
   2  12  -2  98376.  23211.   1
  -2 -12  -2 109764.  25886.   1
  -2 -12  -2 142556.  33638.   1
   2  12   2 114361.  27029.   1
   2  12   2 119506.  28150.   1
  -2 -12   2 112874.  26641.   1
  -2 -12   2 127670.  30094.   1
   2 -12  -2 232106.  54631.   1
   2 -12  -2 194283.  45804.   1
  -2  12  -2 104436.  24743.   1
  -2  12  -2 104642.  24788.   1
   2 -12   3 120741.  28539.   1
   2 -12   3 107157.  25360.   1
  -2  12   3 148113.  35010.   1
   2  12  -3 144500.  34050.   1
   2  12  -3 139378.  32815.   1
  -2 -12  -3 135353.  31877.   1
  -2 -12  -3 241939.  56917.   1
   2  12   3 150812.  35605.   1
   2  12   3 130963.  30848.   1
  -2 -12   3 173428.  40841.   1
  -2 -12   3 126275.  29751.   1
   2 -12  -3 134987.  31900.   1
  -2  12  -3 141001.  33318.   1
  -2  12  -3 187331.  44112.   1
   2 -12   4 115481.  27304.   1
   2 -12   4 124194.  29339.   1
  -2  12   4  91219.  21694.   1
   2  12  -4 114155.  26938.   1
   2  12  -4  62909.  14946.   1
  -2 -12  -4 125726.  29659.   1
  -2 -12  -4  90876.  21621.   1
   2  12   4  88017.  20958.   1
   2  12   4 110702.  26138.   1
  -2 -12   4 109764.  25886.   1
  -2 -12   4 102561.  24217.   1
   2 -12  -4 102172.  24240.   1
  -2  12  -4 111571.  26412.   1
  -2  12  -4  91013.  21555.   1
   2 -12   5 133112.  31443.   1
   2 -12   5 100960.  23919.   1
  -2  12   5 161148.  38075.   1
   2  12  -5 142671.  33615.   1
  -2 -12  -5 171347.  40521.   1
  -2 -12  -5 127853.  30162.   1
   2  12   5 184518.  43586.   1
   2  12   5 103270.  24423.   1
  -2 -12   5  99863.  23576.   1
   2 -12  -5 128562.  30437.   1
  -2  12  -5 105968.  25109.   1
  -2  12  -5 123073.  29042.   1
   2 -12   6  40064. 9675.27   1
   2 -12   6  45232.  10922.   1
  -2  12   6  25429. 6412.07   1
   2  12  -6  40201. 9611.24   1
  -2 -12  -6  30665. 7756.68   1
  -2 -12  -6  29819. 7402.23   1
   2  12   6  48891.  11900.   1
   2  12   6  66933.  15987.   1
  -2 -12   6  35193. 8440.42   1
   2 -12  -6  53396.  12868.   1
  -2  12  -6  39561. 9583.80   1
  -2  12  -6  49874.  11973.   1
   2 -12   7  68694.  16362.   1
   2 -12   7  55111.  13213.   1
  -2  12   7  42991.  10503.   1
   2  12  -7  51635.  12296.   1
  -2 -12  -7  49714.  12037.   1
  -2 -12  -7  50880.  12435.   1
   2  12   7  51269.  12458.   1
   2  12   7  51178.  12486.   1
  -2 -12   7  61605.  14622.   1
   2 -12  -7  80905.  19312.   1
  -2  12  -7  51063.  12278.   1
  -2  12  -7  50194.  12042.   1
   2 -12   8  96364.  22840.   1
   2 -12   8  86874.  20638.   1
  -2  12   8 109559.  26092.   1
   2  12  -8  88429.  20912.   1
  -2 -12  -8 109353.  26023.   1
  -2 -12  -8  74548.  17940.   1
   2  12   8 105785.  25200.   1
  -2 -12   8 114384.  26984.   1
   2 -12  -8 108644.  25840.   1
  -2  12  -8 117219.  27738.   1
  -2  12  -8  86622.  20556.   1
   2 -12   9  84038.  19959.   1
   2 -12   9  86462.  20542.   1
  -2  12   9  79602.  19163.   1
   2  12  -9  97462.  23028.   1
  -2 -12  -9 101989.  24400.   1
   2  12   9 100000.  23919.   1
  -2 -12   9  97027.  22936.   1
   2 -12  -9  64944.  15781.   1
  -2  12  -9  91745.  21788.   1
  -2  12  -9  84313.  20014.   1
   2 -12  10  44249.  10681.   1
   2 -12  10  44683.  10835.   1
  -2  12  10  50194.  12431.   1
   2  12 -10  33432. 8074.54   1
  -2 -12 -10  52687.  13003.   1
   2  12  10  43105.  10880.   1
   2 -12 -10  73656.  17892.   1
  -2  12 -10  60050.  14379.   1
  -2  12 -10  39607. 9618.10   1
   2 -12  11 9437.45 2732.68   1
   2 -12  11 8223.18 2760.12   1
   2  12 -11 8262.05 2414.82   1
  -2 -12 -11 3338.67 3123.71   1
   2  12  11  10839. 3990.39   1
  -2 -12  11  11692. 3075.69   1
   2 -12 -11  27235. 7521.15   1
  -2  12 -11  12836. 3514.75   1
  -2  12 -11 7930.47 2584.04   1
   2 -12  12 9295.67 2686.94   1
   2 -12  12 2407.96 1803.57   1
  -2  12  12 4390.57 2833.29   1
   2  12 -12  13394. 3587.92   1
  -2 -12 -12 3464.44 2936.20   1
   2  12  12 6576.71 3427.85   1
  -2 -12  12 4648.98 1734.05   1
   2 -12 -12 -218.45 2780.70   1
  -2  12 -12 6297.73 2169.45   1
  -2  12 -12 4710.72 2064.26   1
   2 -12  13  32746. 8035.67   1
   2 -12  13  16080. 4413.44   1
  -2  12  13  28150. 7523.43   1
   2  12 -13  30208. 7427.39   1
  -2 -12 -13  19714. 5764.92   1
   2  12  13  17720. 5362.45   1
  -2 -12  13  43837.  10579.   1
   2 -12 -13  26686. 7402.23   1
  -2  12 -13  33249. 8154.58   1
  -2  12 -13  15559. 4198.49   1
   2 -12  14  39309. 9558.65   1
   2 -12  14  36016. 8952.66   1
  -2  12  14  30620. 8063.11   1
   2  12 -14  33272. 8156.86   1
  -2 -12 -14  21066. 6110.22   1
   2  12  14  30071. 8081.40   1
  -2 -12  14  23165. 5817.51   1
   2 -12 -14  41642.  10704.   1
  -2  12 -14  18006. 4699.29   1
  -2  12 -14  21420. 5547.67   1
   2 -12  15  21050. 5360.16   1
   2 -12  15  12858. 3921.79   1
  -2  12  15  10599. 3887.49   1
  -2 -12 -15  11432. 4331.12   1
   2  12  15  17423. 5389.89   1
  -2 -12  15  35879. 8742.27   1
   2 -12 -15  17549. 5616.28   1
  -2  12 -15  18408. 4767.89   1
  -2  12 -15  23714. 6151.38   1
   2 -12  16  32266. 8010.51   1
   2 -12  16  38829. 9714.15   1
   2  12 -16  21701. 5575.11   1
  -2 -12 -16  17224. 5394.46   1
   2  12  16  14665. 5012.57   1
  -2 -12  16  36245. 8858.90   1
   2 -12 -16  22088. 6670.47   1
  -2  12 -16  24285. 6197.11   1
  -2  12 -16  43769.  10741.   1
   2 -12  17  20249. 5348.73   1
   2 -12  17  12989. 4420.30   1
   2  12 -17  13480. 3869.19   1
  -2 -12 -17  14603. 4989.70   1
  -2 -12  17  16064. 4333.41   1
  -2  12 -17 9583.80 3057.39   1
  -2  12 -17  18886. 5380.74   1
   2 -12  18  45003.  11024.   1
   2 -12  18  35239. 9016.68   1
   2  12 -18  24102. 6229.13   1
  -2 -12 -18  11813. 4294.53   1
  -2 -12  18  32884. 8184.30   1
  -2  12 -18  50400.  12296.   1
  -2  12 -18  29453. 7786.41   1
   2 -12  19 101326.  24148.   1
   2 -12  19  85525.  20631.   1
   2  12 -19  67391.  16190.   1
  -2 -12  19  70844.  16995.   1
  -2  12 -19  89687.  21461.   1
  -2  12 -19  98445.  23622.   1
   2 -12  20  76401.  18340.   1
   2 -12  20  89755.  21637.   1
   2  12 -20  58587.  14148.   1
  -2  12 -20  96318.  23005.   1
  -2  12 -20 103865.  24903.   1
   2 -12  21  49440.  12067.   1
   2 -12  21  26298. 7116.39   1
  -2  12 -21  27647. 7136.97   1
  -2  12 -21  27167. 7500.56   1
   2 -12  22  23897. 6233.70   1
   2 -12  22  26504. 7278.75   1
  -2  12 -22  17496. 4877.65   1
  -2  12 -22  25772. 7127.82   1
   2 -12  23  10826. 3503.31   1
   2 -12  23 4628.40 3126.00   1
  -2  12 -23 9592.95 3414.13   1
  -2  12 -23  13217. 4770.18   1
   2 -12  24 6926.59 2769.26   1
   2 -12  24 8900.06 3901.21   1
  -2  12 -24 6729.93 2947.63   1
  -2  12 -24 8090.55 3720.55   1
   2 -12  25  823.00 1922.71   1
   2 -12  25 4004.11 3233.47   1
  -2  12 -25 1603.70 2277.15   1
  -2  12 -25 4241.94 3658.81   1
   2 -12  26  15122. 4388.29   1
   2 -12  26 2872.17 2883.60   1
  -2  12 -26 3777.72 2547.45   1
  -2  12 -26 1496.45 3439.28   1
   2 -12  27 2284.01 2373.65   1
   2 -12  27 1295.68 2874.45   1
  -2  12 -27 2796.70 2696.09   1
  -2  12 -27  667.73 3228.90   1
   2 -12  28 3812.02 2556.59   1
   2 -12  28 1866.22 2890.46   1
  -2  12 -28 5456.20 3016.23   1
  -2  12 -28  895.49 3011.66   1
   2 -12  29 3087.12 2478.85   1
   2 -12  29 -123.19 2545.16   1
  -2  12 -29 4285.38 3041.39   1
  -2  12 -29 -136.79 2622.91   1
   2 -12  30 -1270.5 2460.55   1
  -2  12 -30 1922.02 2618.34   1
  -2  12 -30  797.16 2613.76   1
   2 -12  31 1750.28 2609.19   1
  -2  12 -31 2394.24 2766.98   1
   2 -12  32  817.52 2170.36   1
  -2  12 -32  182.03 2698.37   1
   2  14   0 1609.19 1264.12   1
   2  14   0 4301.39 1624.51   1
  -2 -14   0 1918.36 1223.87   1
  -2 -14   0 4189.34 1494.85   1
   2 -14   0 8264.34 2506.29   1
   2 -14   0 6059.91 2613.76   1
  -2  14   0 7022.63 2262.06   1
  -2  14   0 1906.01 1817.51   1
   2 -14   1  87354.  20768.   1
   2 -14   1  91745.  21859.   1
  -2  14   1  72399.  17290.   1
  -2  14   1  70501.  16856.   1
   2  14  -1 100480.  23782.   1
   2  14  -1  68923.  16318.   1
  -2 -14  -1  83855.  19799.   1
  -2 -14  -1  77018.  18335.   1
   2  14   1  65950.  15621.   1
   2  14   1  90441.  21486.   1
  -2 -14   1  79305.  18811.   1
  -2 -14   1  83833.  19801.   1
   2 -14  -1 112371.  26641.   1
   2 -14  -1 120878.  28653.   1
  -2  14  -1  68603.  16396.   1
  -2  14  -1  71255.  17029.   1
   2 -14   2  34210. 8355.81   1
   2 -14   2  42214.  10318.   1
  -2  14   2  29545. 7315.34   1
  -2  14   2  31351. 7781.84   1
   2  14  -2  37594. 9071.57   1
   2  14  -2  47999.  11475.   1
  -2 -14  -2  55774.  13259.   1
  -2 -14  -2  37343. 9112.73   1
   2  14   2  47542.  11466.   1
   2  14   2  37480. 8991.53   1
  -2 -14   2  35422. 8554.76   1
  -2 -14   2  35582. 8573.05   1
   2 -14  -2  32220. 7919.04   1
   2 -14  -2  33821. 8426.70   1
  -2  14  -2  37045. 9030.41   1
  -2  14  -2  40201. 9803.33   1
   2 -14   3  56323.  13499.   1
   2 -14   3  58610.  14084.   1
  -2  14   3  65195.  15632.   1
   2  14  -3  44889.  10759.   1
   2  14  -3  54562.  13023.   1
  -2 -14  -3  56826.  13517.   1
  -2 -14  -3  49485.  11937.   1
   2  14   3  46421.  11228.   1
   2  14   3  48914.  11678.   1
  -2 -14   3  60279.  14352.   1
  -2 -14   3  59044.  14038.   1
   2 -14  -3  46924.  11342.   1
  -2  14  -3  80128.  19094.   1
  -2  14  -3  74091.  17674.   1
   2 -14   4  22367. 5604.84   1
   2 -14   4  27784. 6942.60   1
  -2  14   4  29431. 7351.93   1
   2  14  -4  15918. 4033.84   1
   2  14  -4  23828. 5943.28   1
  -2 -14  -4  21724. 5403.61   1
  -2 -14  -4  27647. 6935.74   1
   2  14   4  29957. 7507.42   1
   2  14   4  26229. 6428.08   1
  -2 -14   4  20956. 5142.92   1
  -2 -14   4  17020. 4308.25   1
   2 -14  -4  53624.  12954.   1
  -2  14  -4  25589. 6366.33   1
  -2  14  -4  31031. 7662.92   1
   2 -14   5 8849.75 2554.31   1
   2 -14   5  19373. 5003.43   1
  -2  14   5  11061. 3267.78   1
   2  14  -5  24880. 6080.49   1
  -2 -14  -5  19472. 4927.96   1
  -2 -14  -5 8202.60 2981.93   1
   2  14   5  17619. 4991.99   1
   2  14   5  19556. 4982.84   1
  -2 -14   5  14253. 3608.50   1
   2 -14  -5  10540. 3201.46   1
  -2  14  -5  18447. 4710.72   1
  -2  14  -5  22289. 5611.70   1
   2 -14   6  38052. 9236.21   1
   2 -14   6  52870.  12730.   1
  -2  14   6  40636. 9981.70   1
   2  14  -6  45186.  10814.   1
  -2 -14  -6  54585.  13416.   1
  -2 -14  -6  29751. 7351.93   1
   2  14   6  68328.  16613.   1
   2  14   6  26366. 6649.89   1
  -2 -14   6  27784. 6732.21   1
   2 -14  -6  49851.  12120.   1
  -2  14  -6  32449. 7948.77   1
  -2  14  -6  32289. 7907.61   1
   2 -14   7  43060.  10396.   1
   2 -14   7  34690. 8506.74   1
  -2  14   7  33661. 8371.82   1
   2  14  -7  46398.  11093.   1
  -2 -14  -7  41207.  10423.   1
  -2 -14  -7  50492.  12268.   1
   2  14   7  41779.  10579.   1
   2  14   7  49234.  12015.   1
  -2 -14   7  34622. 8326.08   1
   2 -14  -7  38600. 9526.63   1
  -2  14  -7  37937. 9222.49   1
  -2  14  -7  49577.  11937.   1
   2 -14   8  21084. 5323.57   1
   2 -14   8  21962. 5616.28   1
  -2  14   8  14176. 3969.81   1
   2  14  -8  22852. 5625.42   1
  -2 -14  -8  17283. 5051.45   1
  -2 -14  -8  26023. 6860.27   1
   2  14   8  48982.  12207.   1
   2  14   8  27761. 7287.90   1
  -2 -14   8  22627. 5559.11   1
   2 -14  -8  23576. 6142.23   1
  -2  14  -8  32175. 7893.89   1
  -2  14  -8  20901. 5332.72   1
   2 -14   9  69906.  16673.   1
  -2  14   9  82529.  19790.   1
   2  14  -9  96524.  22833.   1
  -2 -14  -9  79808.  19314.   1
  -2 -14  -9 107843.  25772.   1
   2  14   9  52778.  13060.   1
   2  14   9  93094.  22335.   1
  -2 -14   9 107523.  25406.   1
   2 -14  -9  70661.  17029.   1
  -2  14  -9  99908.  23691.   1
  -2  14  -9  75600.  17999.   1
   2 -14  10  31969. 7839.00   1
   2 -14  10  27990. 7004.34   1
  -2  14  10  37251. 9416.87   1
   2  14 -10  16421. 4173.33   1
  -2 -14 -10  27304. 7420.53   1
  -2 -14 -10  28767. 7555.45   1
   2  14  10  17800. 5508.80   1
  -2 -14  10  17672. 4427.16   1
   2 -14 -10  32015. 8232.33   1
  -2  14 -10  22641. 5739.76   1
  -2  14 -10  24240. 6149.09   1
   2 -14  11  27029. 6688.77   1
   2 -14  11  46810.  11345.   1
  -2  14  11  32449. 8573.05   1
   2  14 -11  31306. 7608.04   1
  -2 -14 -11  38212. 9803.33   1
   2  14  11  27144. 7434.25   1
  -2 -14  11  34141. 8248.33   1
   2 -14 -11  51749.  12950.   1
  -2  14 -11  55957.  13448.   1
  -2  14 -11  37617. 9217.92   1
   2 -14  12  11267. 3171.73   1
   2 -14  12 8278.06 2776.12   1
  -2  14  12 7127.82 3480.44   1
   2  14 -12 8879.48 2501.71   1
  -2 -14 -12  11452. 4276.24   1
   2  14  12 7086.66 3462.15   1
  -2 -14  12  24080. 5934.14   1
   2 -14 -12 7324.48 3951.52   1
  -2  14 -12 8348.95 2618.34   1
  -2  14 -12 8852.04 2858.45   1
   2 -14  13  23211. 5838.09   1
   2 -14  13  18436. 5012.57   1
  -2  14  13  19975. 6071.34   1
   2  14 -13  19854. 5001.14   1
  -2 -14 -13  15619. 5060.59   1
   2  14  13  16840. 5417.33   1
  -2 -14  13  22497. 5597.98   1
   2 -14 -13  15911. 5664.30   1
  -2  14 -13  20844. 5328.15   1
  -2  14 -13  16488. 4495.77   1
   2 -14  14  26938. 6727.64   1
   2 -14  14  41619.  10263.   1
  -2  14  14  70912.  17688.   1
   2  14 -14  48091.  11608.   1
  -2 -14 -14  23119. 6579.00   1
   2  14  14  23142. 6585.86   1
  -2 -14  14  35788. 8765.14   1
   2 -14 -14  51635.  13487.   1
  -2  14 -14  45529.  11029.   1
  -2  14 -14  51612.  12518.   1
   2 -14  15  26869. 6741.36   1
   2 -14  15  18635. 5195.51   1
  -2  14  15  20709. 6617.88   1
   2  14 -15  29362. 7338.20   1
  -2 -14 -15  11909. 4548.36   1
   2  14  15  13192. 4571.23   1
  -2 -14  15  23051. 5931.85   1
   2 -14 -15  27510. 8335.23   1
  -2  14 -15  20597. 5339.58   1
  -2  14 -15  10988. 3439.28   1
   2 -14  16  23759. 6064.48   1
   2 -14  16  11351. 3640.52   1
  -2  14  16  13860. 5316.71   1
   2  14 -16  11912. 3487.31   1
  -2 -14 -16 7349.64 3519.32   1
  -2 -14  16  13913. 3905.78   1
   2 -14 -16  16261. 6062.19   1
  -2  14 -16  14320. 3965.24   1
  -2  14 -16 7980.78 2975.07   1
   2 -14  17  24354. 6240.56   1
   2 -14  17  50492.  12431.   1
  -2  14  17  36268. 9803.33   1
   2  14 -17  29385. 7427.39   1
  -2 -14  17  45415.  11100.   1
   2 -14 -17  27853. 8300.93   1
  -2  14 -17  37137. 9165.32   1
  -2  14 -17  25978. 6787.10   1
   2 -14  18  18923. 5072.03   1
   2 -14  18  21111. 5984.44   1
   2  14 -18  27647. 7043.21   1
  -2 -14  18  31054. 7790.98   1
   2 -14 -18  11855. 5277.84   1
  -2  14 -18  23416. 6059.91   1
  -2  14 -18  23599. 6471.52   1
   2 -14  19  33067. 8303.22   1
   2 -14  19  19959. 5828.94   1
   2  14 -19  16901. 4646.69   1
  -2 -14  19  16776. 4680.99   1
  -2  14 -19  20261. 5433.34   1
  -2  14 -19  13661. 4699.29   1
   2 -14  20  58061.  14107.   1
   2 -14  20  50217.  12499.   1
   2  14 -20  50217.  12257.   1
  -2 -14  20  36794. 9156.18   1
  -2  14 -20  72262.  17411.   1
  -2  14 -20  71301.  17441.   1
   2 -14  21  15975. 4564.37   1
   2 -14  21  28150. 7612.62   1
   2  14 -21  19428. 5250.40   1
  -2 -14  21  18479. 5035.44   1
  -2  14 -21  38646. 9705.00   1
  -2  14 -21  17340. 5662.01   1
   2 -14  22  90075.  21589.   1
   2 -14  22  96364.  23256.   1
   2  14 -22  73519.  17702.   1
  -2 -14  22  92637.  22145.   1
  -2  14 -22 118614.  28310.   1
  -2  14 -22  71461.  17597.   1
   2 -14  23  50149.  12342.   1
   2 -14  23  64349.  15875.   1
   2  14 -23  48571.  11907.   1
  -2 -14  23  51726.  12643.   1
  -2  14 -23  58450.  14290.   1
  -2  14 -23  76149.  18655.   1
   2 -14  24 9938.25 3350.10   1
   2 -14  24 3183.17 3306.65   1
   2  14 -24 9917.67 3331.81   1
  -2  14 -24  13762. 4310.54   1
  -2  14 -24  11146. 4751.88   1
   2 -14  25 9830.77 3457.58   1
   2 -14  25 7855.01 3777.72   1
   2  14 -25 9993.13 3265.49   1
  -2  14 -25 6482.96 3158.01   1
  -2  14 -25 6720.78 3759.43   1
   2 -14  26 2380.51 2494.85   1
   2 -14  26 2929.34 2849.30   1
  -2  14 -26 1197.35 2586.32   1
  -2  14 -26 2142.46 3334.09   1
   2 -14  27 3162.59 2732.68   1
   2 -14  27 1680.77 2504.00   1
  -2  14 -27 9108.15 3697.69   1
  -2  14 -27 1579.92 2924.76   1
   2 -14  28 4500.34 2858.45   1
   2 -14  28  935.28 2471.98   1
  -2  14 -28 5165.79 3130.57   1
  -2  14 -28 4040.70 2943.06   1
   2 -14  29 5168.07 2904.18   1
   2 -14  29 1200.78 2494.85   1
  -2  14 -29  11980. 4219.07   1
  -2  14 -29  825.06 2622.91   1
   2 -14  30 3928.65 2794.42   1
   2 -14  30  441.57 2620.62   1
  -2  14 -30 1159.61 2579.46   1
  -2  14 -30 1510.63 2739.54   1
   2 -14  31  530.53 2499.43   1
   2 -14  31 -203.57 2760.12   1
  -2  14 -31 1432.88 2734.96   1
  -2  14 -31 -412.30 2837.87   1
   2  16   0 1446.83 1403.61  -1
  -2 -16   0 6844.26 2176.08  -1
  -2 -16   0 3315.80 1346.21  -1
   2 -16   0 2423.96 1475.42  -1
   2 -16   0 1450.03 2033.38  -1
  -2  16   0 2565.74 1597.07  -1
  -2  16   0 3025.38 2069.74  -1
   2 -16   1 6771.09 2321.06   1
   2 -16   1  10579. 3514.75   1
  -2  16   1  16794. 4667.27   1
   2  16  -1 7694.94 2380.51   1
   2  16  -1  12927. 3388.97   1
  -2 -16  -1  22913. 5835.81   1
  -2 -16  -1  13009. 3338.67   1
   2  16   1  14590. 3761.72   1
  -2 -16   1  38898. 9293.38   1
   2 -16  -1  16330. 4321.97   1
   2 -16  -1  15173. 4356.27   1
  -2  16  -1 8243.76 2533.73   1
  -2  16  -1  12298. 3663.39   1
   2 -16   2 7217.01 2332.49   1
   2 -16   2  12662. 3764.00   1
  -2  16   2  11345. 3249.48   1
  -2  16   2 8589.06 2947.63   1
   2  16  -2  10622. 2963.64   1
   2  16  -2  21082. 5307.56   1
  -2 -16  -2 5158.92 2159.16   1
  -2 -16  -2 7294.76 2145.21   1
   2  16   2  16513. 4193.91   1
   2  16   2 5479.07 2109.99   1
  -2 -16   2  15093. 3924.08   1
  -2 -16   2 7168.98 2116.85   1
   2 -16  -2  11422. 3240.34   1
   2 -16  -2  19339. 5325.86   1
  -2  16  -2 6803.10 2260.23   1
  -2  16  -2  13213. 3912.64   1
   2 -16   3 2166.25 1443.63   1
  -2  16   3 2077.98 1520.01   1
   2  16  -3 8042.53 2419.39   1
   2  16  -3 9846.78 2833.29   1
  -2 -16  -3 2314.20 1584.49   1
  -2 -16  -3  11987. 3151.15   1
   2  16   3  13142. 3731.99   1
   2  16   3 9846.78 2728.10   1
   2 -16  -3 3155.73 1781.38   1
  -2  16  -3 2931.62 1642.12   1
  -2  16  -3  23165. 5945.57   1
   2 -16   4  13565. 3647.38  -1
   2 -16   4  20050. 5232.10  -1
  -2  16   4  10204. 3123.71  -1
   2  16  -4  12063. 3270.06  -1
   2  16  -4  32998. 8051.67  -1
  -2 -16  -4 8314.65 2734.96  -1
  -2 -16  -4  29636. 7194.14  -1
   2  16   4  24971. 6375.48  -1
   2  16   4  40567. 9755.31  -1
  -2 -16   4  12774. 3338.67  -1
   2 -16  -4  14448. 4049.85  -1
  -2  16  -4  11324. 3217.47  -1
  -2  16  -4  31146. 7694.94  -1
   2 -16   5  13272. 3809.74   1
  -2  16   5  16931. 4653.55   1
   2  16  -5 5774.06 1867.37   1
  -2 -16  -5  26252. 6501.25   1
  -2 -16  -5 5920.42 2271.66   1
   2  16   5 6736.79 2428.54   1
  -2 -16   5 5531.67 1804.94   1
   2 -16  -5  12360. 3697.69   1
  -2  16  -5  12513. 3507.89   1
   2 -16   6  79122.  18854.   1
   2 -16   6  82255.  19584.   1
  -2  16   6  91447.  21882.   1
   2  16  -6 104025.  24628.   1
  -2 -16  -6 101280.  24240.   1
  -2 -16  -6  86256.  20496.   1
   2  16   6  98102.  23348.   1
   2  16   6 124125.  29636.   1
  -2 -16   6 102835.  24331.   1
   2 -16  -6  90716.  21722.   1
  -2  16  -6 100297.  23828.   1
  -2  16  -6 110130.  26069.   1
   2 -16   7 5822.08 2066.09   1
   2 -16   7  18971. 5051.45   1
  -2  16   7 7491.42 2670.93   1
   2  16  -7 6604.16 2075.00   1
  -2 -16  -7  19723. 5787.78   1
   2  16   7 6514.97 3350.10   1
   2  16   7 5888.40 3183.17   1
  -2 -16   7 3308.94 1313.06   1
   2 -16  -7 3519.32 2167.39   1
  -2  16  -7 3212.89 1652.18   1
  -2  16  -7  20665. 5330.43   1
   2 -16   8 7454.83 2398.81   1
   2 -16   8  16103. 4402.01   1
  -2  16   8 7281.04 2645.78   1
   2  16  -8 9085.29 2584.04   1
  -2 -16  -8 8115.70 3523.89   1
  -2 -16  -8  15900. 5261.83   1
   2  16   8  14402. 4886.80   1
   2  16   8 4989.70 3384.40   1
  -2 -16   8  12195. 3224.33   1
   2 -16  -8  11507. 3651.95   1
  -2  16  -8 9771.31 2849.30   1
  -2  16  -8 6295.44 2373.65   1
   2 -16   9  85319.  20300.   1
   2 -16   9  69152.  16593.   1
  -2  16   9  68031.  16467.   1
   2  16  -9  79648.  18905.   1
  -2 -16  -9  96798.  23531.   1
  -2 -16  -9 112806.  26984.   1
   2  16   9  74777.  18438.   1
  -2 -16   9  71095.  16892.   1
   2 -16  -9  76995.  18573.   1
  -2  16  -9  96455.  22913.   1
  -2  16  -9 108827.  25817.   1
   2 -16  10 9679.84 2810.43   1
   2 -16  10 2159.16 2003.66   1
  -2  16  10 4456.89 2636.63   1
   2  16 -10 5351.01 1884.97   1
  -2 -16 -10 2972.78 3336.38   1
  -2 -16 -10 2478.85 3267.78   1
   2  16  10 4486.62 3807.45   1
   2  16  10 1679.62 3331.81   1
  -2 -16  10  17727. 4463.75   1
   2 -16 -10 2718.95 2410.24   1
  -2  16 -10  12248. 3377.54   1
  -2  16 -10 6430.36 2659.50   1
   2 -16  11 9849.06 2856.16   1
   2 -16  11 3853.19 2216.33   1
  -2  16  11  11697. 4253.37   1
   2  16 -11  12710. 3416.42   1
  -2 -16 -11 6352.61 3962.95   1
  -2 -16 -11 9876.50 3967.52   1
   2  16  11 3839.47 3793.73   1
   2  16  11 4427.16 3217.47   1
  -2 -16  11 8360.39 2387.37   1
   2 -16 -11  12705. 4559.79   1
  -2  16 -11 7345.07 2394.24   1
  -2  16 -11 5229.81 2225.70   1
   2 -16  12  41871.  10174.  -1
   2 -16  12  54013.  13041.  -1
  -2  16  12  47679.  12273.  -1
   2  16 -12  63480.  15154.  -1
  -2 -16 -12  35170. 9478.61  -1
  -2 -16 -12  52481.  13003.  -1
   2  16  12  48251.  12021.  -1
  -2 -16  12  67711.  16128.  -1
   2 -16 -12  53807.  13716.  -1
  -2  16 -12  47999.  11610.  -1
  -2  16 -12  56071.  13515.  -1
   2 -16  13 2018.29 1516.58   1
   2 -16  13   -8.71 1738.62   1
  -2  16  13 3892.06 3549.05   1
   2  16 -13 8566.19 2590.90   1
  -2 -16 -13  -37.78 2712.09   1
   2  16  13 4811.34 3082.55   1
  -2 -16  13 4994.28 1849.99   1
   2 -16 -13  402.01 3864.62   1
  -2  16 -13 3240.34 1736.56   1
  -2  16 -13 4360.85 2163.96   1
   2 -16  14 3441.57 1776.81   1
   2 -16  14  11205. 3539.90   1
  -2  16  14 1718.04 3334.09   1
  -2 -16 -14 2895.03 3077.98   1
   2  16  14 1731.76 2691.51   1
  -2 -16  14  16643. 4319.68   1
   2 -16 -14 2819.57 4221.35   1
  -2  16 -14 4758.74 2028.81   1
  -2  16 -14  10370. 3267.78   1
   2 -16  15  10268. 3084.84   1
   2 -16  15  10293. 3505.60   1
  -2  16  15 8108.84 4619.25   1
   2  16 -15  11834. 3343.24   1
  -2 -16 -15 1944.66 2686.94   1
  -2 -16  15 8966.38 2730.39   1
   2 -16 -15  12280. 5577.40   1
  -2  16 -15 5730.61 2295.90   1
  -2  16 -15 8527.32 3132.86   1
   2 -16  16  24971. 6338.89   1
   2 -16  16  31855. 8175.16   1
  -2  16  16  17882. 5991.30   1
   2  16 -16  24171. 6142.23   1
  -2 -16  16  12291. 3560.48   1
   2 -16 -16  16709. 6384.63   1
  -2  16 -16  13348. 3864.62   1
  -2  16 -16  18694. 5341.87   1
   2 -16  17  41733.  10236.   1
   2 -16  17  25772. 6841.98   1
  -2  16  17  25749. 7720.09   1
   2  16 -17  36474. 9005.25   1
  -2 -16  17  40773.  10062.   1
   2 -16 -17  29614. 8929.79   1
  -2  16 -17  25040. 6405.21   1
  -2  16 -17  29202. 7633.20   1
   2 -16  18  20853. 5458.49   1
   2 -16  18  13897. 4607.82   1
  -2  16  18  20373. 6823.68   1
   2  16 -18  23233. 6030.18   1
  -2 -16  18  28699. 7340.49   1
   2 -16 -18  14784. 6519.55   1
  -2  16 -18  30482. 7646.92   1
  -2  16 -18  11137. 4038.41   1
   2 -16  19 2833.29 1926.36   1
   2 -16  19 1926.14 2949.92   1
  -2  16  19 6965.46 4557.51   1
   2  16 -19 2570.32 2102.44   1
  -2 -16  19  11095. 3553.62   1
   2 -16 -19  12358. 5874.68   1
  -2  16 -19 4969.12 2357.65   1
  -2  16 -19 6043.90 3542.19   1
   2 -16  20 5627.71 2481.13   1
   2 -16  20 4548.36 3224.33   1
   2  16 -20 3180.88 2229.59   1
  -2 -16  20 3013.95 2252.46   1
   2 -16 -20 8271.20 5058.31   1
  -2  16 -20 4646.69 2353.07   1
  -2  16 -20 6430.36 3956.09   1
   2 -16  21  31740. 8056.25   1
   2 -16  21  31672. 8483.87   1
   2  16 -21  30460. 7797.84   1
  -2 -16  21  33112. 8392.40   1
  -2  16 -21  32792. 8342.09   1
  -2  16 -21  41985.  10908.   1
   2 -16  22  28424. 7374.79   1
   2 -16  22  17356. 5657.44   1
   2  16 -22  21100. 5730.61   1
  -2 -16  22  33524. 8536.47   1
  -2  16 -22  24720. 6510.40   1
  -2  16 -22  25589. 7292.47   1
   2 -16  23 6647.60 2917.90   1
   2 -16  23  13785. 4756.46   1
   2  16 -23  18143. 5197.80   1
  -2 -16  23 3558.19 2565.74   1
  -2  16 -23  10942. 3805.16   1
  -2  16 -23 8067.68 4219.07   1
   2 -16  24 8081.40 3313.51   1
   2 -16  24 3420.99 3171.73   1
   2  16 -24 2698.37 2533.73   1
  -2 -16  24 5120.05 2890.46   1
  -2  16 -24 6279.44 3109.99   1
  -2  16 -24 6073.63 3896.63   1
   2 -16  25 3633.66 2826.43   1
   2 -16  25 1389.66 2670.93   1
   2  16 -25 2490.28 2762.40   1
  -2 -16  25 4498.05 3020.81   1
  -2  16 -25 3793.73 2895.03   1
  -2  16 -25 3715.98 3304.36   1
   2 -16  26 4959.98 2924.76   1
   2 -16  26  843.81 2423.96   1
   2  16 -26 1631.60 2540.59   1
  -2 -16  26 2254.51 2492.57   1
  -2  16 -26 5190.94 3153.44   1
  -2  16 -26 1131.26 2776.12   1
   2 -16  27 7802.42 3256.34   1
   2 -16  27 2831.01 2716.67   1
   2  16 -27 5383.03 2890.46   1
  -2 -16  27 8060.82 3256.34   1
  -2  16 -27 9442.02 3848.61   1
  -2  16 -27 1196.43 2885.89   1
   2 -16  28 5529.38 2888.17   1
   2 -16  28 1881.32 2426.25   1
   2  16 -28 4248.80 2831.01   1
  -2  16 -28 2295.90 3013.95   1
  -2  16 -28 2412.53 2908.76   1
   2 -16  29 1391.26 2506.29   1
   2 -16  29 -661.56 2508.57   1
   2  16 -29 2895.03 2661.79   1
  -2  16 -29 1879.94 2927.05   1
  -2  16 -29  597.30 2590.90   1
   2  18   0  20368. 5275.55   1
   2  18   0  22698. 5613.99   1
  -2 -18   0  21306. 5369.31   1
  -2 -18   0  42854.  10220.   1
   2 -18   0  20505. 5389.89   1
   2 -18   0  24034. 6094.21   1
  -2  18   0  23645. 5970.72   1
  -2  18   0  21765. 5668.87   1
   2 -18   1  10306. 3224.33   1
  -2  18   1  36588. 8954.94   1
  -2  18   1  18072. 4815.91   1
   2  18  -1  36016. 8797.16   1
   2  18  -1  14080. 3665.67   1
  -2 -18  -1  21868. 5394.46   1
   2  18   1  22067. 5449.34   1
   2  18   1  17558. 4703.86   1
  -2 -18   1  35193. 8575.34   1
  -2 -18   1  14512. 3654.24   1
   2 -18  -1  24674. 6384.63   1
   2 -18  -1  35513. 8726.27   1
  -2  18  -1  12870. 3690.83   1
   2 -18   2  22136. 5623.14   1
   2 -18   2  33775. 8408.41   1
  -2  18   2  27007. 6764.23   1
  -2  18   2  21120. 5506.51   1
   2  18  -2  32152. 7770.40   1
   2  18  -2  31214. 7651.49   1
  -2 -18  -2  23531. 6110.22   1
  -2 -18  -2  30117. 7285.61   1
   2  18   2  27418. 6686.48   1
   2  18   2  33112. 8348.95   1
  -2 -18   2  25772. 6402.92   1
  -2 -18   2  29339. 7063.79   1
   2 -18  -2  35559. 8758.28   1
   2 -18  -2  21189. 5554.53   1
  -2  18  -2  25383. 6364.05   1
  -2  18  -2  31489. 7843.58   1
   2 -18   3  66362.  15893.   1
   2 -18   3 116991.  27716.   1
  -2  18   3  58267.  14068.   1
   2  18  -3  45392.  10967.   1
   2  18  -3 109010.  25726.   1
  -2 -18  -3  62977.  15214.   1
  -2 -18  -3  64578.  15310.   1
   2  18   3  51589.  12630.   1
   2  18   3  73634.  17453.   1
  -2 -18   3  48113.  11582.   1
  -2 -18   3  93506.  22037.   1
   2 -18  -3  67665.  16254.   1
  -2  18  -3  80380.  19165.   1
   2 -18   4  41162.  10007.   1
   2 -18   4  59684.  14336.   1
  -2  18   4  54265.  13181.   1
   2  18  -4  77109.  18367.   1
   2  18  -4  58472.  13926.   1
  -2 -18  -4  71347.  16915.   1
  -2 -18  -4  55271.  13430.   1
   2  18   4  72399.  17462.   1
   2  18   4  58084.  13867.   1
  -2 -18   4  63640.  15198.   1
  -2 -18   4  40247. 9602.09   1
   2 -18  -4  50263.  12230.   1
  -2  18  -4  65721.  15749.   1
  -2  18  -4  53876.  12993.   1
   2 -18   5 7903.03 2474.27   1
  -2  18   5  22200. 5897.55   1
   2  18  -5  14679. 3841.75   1
   2  18  -5 3068.83 1718.50   1
  -2 -18  -5 2842.44 1795.10   1
  -2 -18  -5 4273.95 2181.80   1
   2  18   5 9501.48 3224.33   1
   2  18   5 6286.30 2773.84   1
   2 -18  -5  13970. 4148.18   1
  -2  18  -5  10478. 3018.52   1
  -2  18  -5  12692. 3686.25   1
   2 -18   6  38052. 9265.94   1
   2 -18   6  24034. 6091.92   1
  -2  18   6  18827. 5257.26   1
   2  18  -6  31031. 7601.18   1
  -2 -18  -6  38715. 9533.49   1
  -2 -18  -6  15083. 4406.58   1
   2  18   6  10720. 3718.27   1
   2  18   6  49051.  12067.   1
  -2 -18   6  22424. 5563.68   1
   2 -18  -6  25452. 6723.07   1
  -2  18  -6  22630. 5721.47   1
  -2  18  -6  33570. 8246.05   1
   2 -18   7  61491.  14727.   1
   2 -18   7  64166.  15367.   1
  -2  18   7  52755.  12964.   1
   2  18  -7  61674.  14720.   1
  -2 -18  -7  73039.  17830.   1
  -2 -18  -7  93048.  22220.   1
   2  18   7  65881.  16373.   1
   2  18   7  79854.  19238.   1
  -2 -18   7  65424.  15575.   1
   2 -18  -7  84427.  20348.   1
  -2  18  -7  64006.  15319.   1
  -2  18  -7  93986.  22323.   1
   2 -18   8  49920.  12008.   1
   2 -18   8  56826.  13679.   1
  -2  18   8  48342.  11957.   1
   2  18  -8  53121.  12708.   1
  -2 -18  -8  71621.  17748.   1
  -2 -18  -8  49348.  12182.   1
   2  18   8  70661.  17642.   1
   2  18   8  38989. 9901.66   1
  -2 -18   8  39469. 9510.62   1
   2 -18  -8  49028.  12156.   1
  -2  18  -8  50034.  12067.   1
  -2  18  -8  51681.  12481.   1
   2 -18   9  27190. 6752.79   1
   2 -18   9  29774. 7473.12   1
  -2  18   9  25497. 6741.36   1
   2  18  -9  28859. 7066.08   1
  -2 -18  -9  49234.  12751.   1
  -2 -18  -9  18438. 5431.05   1
   2  18   9  20215. 5808.36   1
   2  18   9  41367.  10983.   1
  -2 -18   9  22701. 5620.85   1
   2 -18  -9  25520. 6844.26   1
  -2  18  -9  26138. 6501.25   1
  -2  18  -9  33112. 8227.75   1
   2 -18  10 2481.13 1465.35   1
   2 -18  10 9073.85 2929.34   1
  -2  18  10  21555. 5979.87   1
   2  18 -10 6739.07 2154.13   1
  -2 -18 -10 4495.77 2766.98   1
  -2 -18 -10 9503.76 4463.75   1
   2  18  10 1151.38 2895.03   1
   2  18  10  10926. 4975.98   1
  -2 -18  10 9467.18 2677.79   1
   2 -18 -10 9599.81 3551.33   1
  -2  18 -10 4555.22 1802.19   1
  -2  18 -10 5764.92 2346.21   1
   2 -18  11  10773. 3132.86   1
   2 -18  11 9334.54 3068.83   1
  -2  18  11 6450.94 2970.50   1
   2  18 -11  10277. 2968.21   1
  -2 -18 -11 3244.91 2922.48   1
  -2 -18 -11  25131. 7534.87   1
   2  18  11 1681.22 2901.90   1
   2  18  11 9586.09 4390.57   1
  -2 -18  11  19796. 5030.87   1
   2 -18 -11 5632.28 2897.32   1
  -2  18 -11 7827.57 2584.04   1
  -2  18 -11 7148.40 2652.64   1
   2 -18  12  19664. 5149.78   1
   2 -18  12  22774. 5947.86   1
  -2  18  12  20046. 6009.60   1
   2  18 -12  14100. 3796.02   1
  -2 -18 -12  13634. 5316.71   1
  -2 -18 -12 8127.14 3619.94   1
   2  18  12  13789. 5302.99   1
   2  18  12 7278.75 3565.05   1
  -2 -18  12  15063. 4020.12   1
   2 -18 -12  15699. 5179.51   1
  -2  18 -12  14939. 4116.16   1
  -2  18 -12  15205. 4285.38   1
   2 -18  13 8758.28 2787.56   1
   2 -18  13  13467. 4075.00   1
  -2  18  13 8586.77 4200.77   1
   2  18 -13 8552.47 2650.35   1
  -2 -18 -13 4033.84 3773.15   1
  -2 -18 -13 1343.01 2680.08   1
   2  18  13 5188.65 3942.37   1
  -2 -18  13 6954.03 2309.62   1
   2 -18 -13 8490.73 4461.46   1
  -2  18 -13 8648.52 2801.28   1
  -2  18 -13 3953.80 2494.85   1
   2 -18  14  23005. 5865.53   1
   2 -18  14  26801. 6940.31   1
  -2  18  14  26984. 8049.39   1
   2  18 -14  26504. 6631.60   1
  -2 -18 -14  13121. 5335.01   1
  -2 -18 -14 8296.36 3443.86   1
  -2 -18  14  24171. 6073.63   1
   2 -18 -14  23439. 7813.85   1
  -2  18 -14  16465. 4454.60   1
  -2  18 -14  22035. 5892.97   1
   2 -18  15 4331.12 1952.89   1
   2 -18  15 3338.67 2444.54   1
  -2  18  15 3340.95 4276.24   1
   2  18 -15 6348.04 2172.65   1
  -2 -18  15 3217.47 1595.01   1
   2 -18 -15 5026.29 4914.24   1
  -2  18 -15 2323.35 1768.12   1
  -2  18 -15 1850.22 2421.68   1
   2 -18  16 3000.23 1742.97   1
   2 -18  16 6398.35 2677.79   1
  -2  18  16 3965.24 4809.05   1
   2  18 -16 3441.57 1661.56   1
  -2 -18  16  17951. 4683.28   1
   2 -18 -16  104.16 4815.91   1
  -2  18 -16 1886.57 1799.45   1
  -2  18 -16 2885.89 2224.10   1
   2 -18  17  17549. 4719.87   1
   2 -18  17  12147. 3834.89   1
  -2  18  17 7621.76 4978.27   1
   2  18 -17  13613. 3805.16   1
  -2 -18  17  15218. 4120.74   1
   2 -18 -17 7980.78 5396.75   1
  -2  18 -17  12257. 3651.95   1
  -2  18 -17 9394.00 3393.55   1
   2 -18  18 4164.19 2026.52   1
   2 -18  18 2895.03 2490.28   1
  -2  18  18 3126.00 4084.15   1
   2  18 -18 4747.31 2009.37   1
  -2 -18  18 5705.46 2371.37   1
   2 -18 -18 6608.73 5463.06   1
  -2  18 -18 5492.79 2380.51   1
  -2  18 -18 2095.36 2462.84   1
   2 -18  19  18308. 4923.39   1
   2 -18  19 9526.63 3640.52   1
  -2  18  19  14052. 5918.13   1
   2  18 -19 9567.79 3073.40   1
  -2 -18  19  18870. 5149.78   1
   2 -18 -19  11484. 6069.05   1
  -2  18 -19  11610. 3526.18   1
  -2  18 -19 9165.32 3514.75   1
   2 -18  20  12486. 3713.69   1
   2 -18  20 4198.49 2970.50   1
  -2  18  20 7020.35 5193.23   1
   2  18 -20 4228.21 2229.82   1
  -2 -18  20  11082. 3571.92   1
   2 -18 -20 2867.59 5076.60   1
  -2  18 -20 5444.77 3338.67   1
   2 -18  21 4891.37 2246.28  -1
   2 -18  21  685.57 3084.84  -1
  -2  18  21 4004.11 4189.34  -1
   2  18 -21 3109.99 2348.50  -1
  -2 -18  21 7008.91 3153.44  -1
   2 -18 -21 5492.79 5264.12  -1
  -2  18 -21  11050. 3423.28  -1
  -2  18 -21 3283.78 3372.97  -1
   2 -18  22  10883. 3503.31   1
   2 -18  22 6190.25 3192.31   1
   2  18 -22 6023.32 2872.17   1
  -2 -18  22 7793.27 3368.39   1
   2 -18 -22 1677.34 4559.79   1
  -2  18 -22 6844.26 2725.81   1
  -2  18 -22 8831.46 3857.76   1
   2 -18  23  15776. 4761.03   1
   2 -18  23 7130.11 3164.87   1
   2  18 -23  15689. 4914.24   1
  -2 -18  23 3898.92 3103.13   1
  -2  18 -23 6279.44 3016.23   1
  -2  18 -23 4939.40 3194.60   1
   2 -18  24 2819.57 2533.73   1
   2 -18  24 -128.26 2279.90   1
   2  18 -24  10912. 3921.79   1
  -2  18 -24  750.51 2545.16   1
  -2  18 -24  870.57 2728.10   1
   2 -18  25 2682.37 2609.19   1
   2 -18  25  529.84 2249.71   1
   2  18 -25 6910.58 3283.78   1
  -2 -18  25 1108.16 2613.76   1
  -2  18 -25 2586.32 2780.70   1
  -2  18 -25 2359.93 2847.01   1
   2 -18  26  672.08 2611.48   1
   2 -18  26  806.54 2426.25   1
   2  18 -26  641.66 2654.93   1
  -2 -18  26 1554.08 2817.29   1
  -2  18 -26 1639.60 2670.93   1
  -2  18 -26  788.02 2753.26   1
   2 -18  27 3009.37 2760.12  -1
   2 -18  27 -132.33 2405.67  -1
   2  18 -27 1279.67 2568.03  -1
  -2 -18  27 5437.91 3043.67  -1
  -2  18 -27 2471.98 2707.52  -1
  -2  18 -27  702.26 2684.65  -1
   2  20   0 6082.77 2339.35   1
  -2 -20   0 5060.59 2064.48   1
  -2 -20   0  13581. 3459.86   1
   2 -20   0 1330.89 1487.08   1
   2 -20   0  18934. 5238.96   1
  -2  20   0 1828.49 1551.56   1
  -2  20   0  10748. 3466.72   1
   2 -20   1 3480.44 1893.66   1
   2 -20   1  12964. 3910.36   1
  -2  20   1 6176.53 2219.53   1
   2  20  -1 1632.97 1555.91   1
   2  20  -1 6643.03 2119.82   1
  -2 -20  -1 2100.16 1287.22   1
  -2 -20  -1 1194.37 1601.42   1
   2  20   1 1952.43 1912.42   1
   2  20   1 4253.37 1784.13   1
  -2 -20   1 9025.83 2776.12   1
  -2 -20   1  886.58 1036.82   1
   2 -20  -1 8111.13 2648.07   1
   2 -20  -1 7072.94 3007.09   1
  -2  20  -1 8202.60 2650.35   1
  -2  20  -1  314.89 1870.34   1
   2 -20   2 7585.17 2517.72   1
   2 -20   2 7070.65 2922.48   1
  -2  20   2 7425.10 2485.71   1
   2  20  -2 7322.20 2446.83   1
   2  20  -2  14180. 3704.55   1
  -2 -20  -2 6592.72 2045.05   1
  -2 -20  -2  14427. 4196.20   1
   2  20   2  18642. 5156.64   1
   2  20   2 6771.09 2285.39   1
  -2 -20   2 4509.49 1915.39   1
  -2 -20   2 9240.79 2506.29   1
   2 -20  -2 7415.95 2508.57   1
   2 -20  -2 2499.43 2136.75   1
  -2  20  -2 6316.02 2222.73   1
  -2  20  -2 8691.96 3075.69   1
   2 -20   3  26229. 6631.60   1
   2 -20   3  18006. 4873.08   1
  -2  20   3  36565. 9062.42   1
   2  20  -3  18402. 4825.06   1
   2  20  -3  28882. 7109.53   1
  -2 -20  -3  36108. 8705.69   1
  -2 -20  -3  20453. 5581.98   1
   2  20   3  20583. 5545.39   1
   2  20   3  21294. 5449.34   1
  -2 -20   3  23645. 5774.06   1
  -2 -20   3  25383. 6373.19   1
   2 -20  -3  15141. 4219.07   1
  -2  20  -3  27876. 7013.49   1
  -2  20  -3  28493. 7164.41   1
   2 -20   4  21566. 5565.97   1
   2 -20   4  16282. 4431.74   1
  -2  20   4  19046. 5154.35   1
   2  20  -4  26115. 6549.27   1
   2  20  -4  21525. 5499.65   1
  -2 -20  -4  25520. 6316.02   1
  -2 -20  -4  16197. 4582.66   1
   2  20   4  26115. 6809.96   1
   2  20   4  21781. 5828.94   1
  -2 -20   4  22182. 5641.43   1
  -2 -20   4  46032.  10956.   1
   2 -20  -4  17871. 4827.35   1
  -2  20  -4  16755. 4477.47   1
  -2  20  -4  22294. 5840.38   1
   2 -20   5  49806.  12072.   1
   2 -20   5  65973.  15815.   1
  -2  20   5  79099.  19037.   1
   2  20  -5  42168.  10215.   1
   2  20  -5  69929.  16732.   1
  -2 -20  -5  70409.  16847.   1
  -2 -20  -5  49668.  12202.   1
   2  20   5  59570.  14546.   1
   2  20   5  76126.  18287.   1
  -2 -20   5  52916.  12751.   1
   2 -20  -5  77727.  18729.   1
  -2  20  -5  65744.  15815.   1
  -2  20  -5  60691.  14546.   1
   2 -20   6  40956.  10023.  -1
   2 -20   6  37320. 9174.47  -1
  -2  20   6  46650.  11560.  -1
   2  20  -6  44729.  10851.  -1
  -2 -20  -6  42236.  10544.  -1
  -2 -20  -6  37320. 9309.39  -1
   2  20   6  43929.  10970.  -1
   2  20   6  39538. 9931.39  -1
  -2 -20   6  53167.  12792.  -1
   2 -20  -6  52344.  12872.  -1
  -2  20  -6  51818.  12573.  -1
  -2  20  -6  39950. 9771.31  -1
   2 -20   7  53396.  12900.   1
   2 -20   7  56277.  13540.   1
  -2  20   7  61765.  15038.   1
   2  20  -7  74274.  17729.   1
  -2 -20  -7  43197.  10693.   1
  -2 -20  -7  51726.  12815.   1
   2  20   7  76858.  18692.   1
   2  20   7  53556.  13160.   1
  -2 -20   7  54402.  13064.   1
   2 -20  -7  67711.  16472.   1
  -2  20  -7  59433.  14322.   1
  -2  20  -7  51772.  12506.   1
   2 -20   8 7809.28 2490.28   1
   2 -20   8  15529. 4369.99   1
  -2  20   8 4726.73 2510.86   1
   2  20  -8 5691.74 1950.38   1
  -2 -20  -8 4921.10 2881.31   1
  -2 -20  -8 6192.54 3279.21   1
   2  20   8  12543. 4857.07   1
   2  20   8 7823.00 3530.75   1
  -2 -20   8 5671.16 1899.61   1
   2 -20  -8 4456.89 2620.62   1
  -2  20  -8 4095.58 1861.42   1
  -2  20  -8 2451.40 1902.81   1
   2 -20   9  20675. 5277.84   1
   2 -20   9  16801. 4690.14   1
  -2  20   9  20011. 5584.26   1
   2  20  -9  24788. 6174.25   1
  -2 -20  -9  16597. 5053.73   1
  -2 -20  -9  23394. 7251.31   1
   2  20   9  28882. 8364.96   1
   2  20   9  22959. 6450.94   1
  -2 -20   9  28287. 6958.60   1
   2 -20  -9  26321. 7111.82   1
  -2  20  -9  26069. 6544.70   1
  -2  20  -9  15237. 4246.51   1
   2 -20  10 8570.77 2604.62   1
   2 -20  10  12177. 3796.02   1
  -2  20  10  11880. 3981.24   1
   2  20 -10 8671.38 2561.17   1
  -2 -20 -10  16410. 6261.14   1
  -2 -20 -10 6942.60 3283.78   1
   2  20  10  21411. 7292.47   1
   2  20  10 5218.38 3114.56   1
  -2 -20  10  14116. 3713.69   1
   2 -20 -10  18248. 5385.31   1
  -2  20 -10  14080. 3825.75   1
  -2  20 -10 9849.06 3194.60   1
   2 -20  11 5577.40 2001.60   1
   2 -20  11 4582.66 2428.54   1
  -2  20  11  10213. 3764.00   1
   2  20 -11 7978.50 2385.09   1
  -2 -20 -11 2198.03 2826.43   1
  -2 -20 -11 9620.39 5083.46   1
   2  20  11  13343. 5897.55   1
   2  20  11 4010.97 2837.87   1
  -2 -20  11 9446.60 2673.22   1
   2 -20 -11  14923. 4822.77   1
  -2  20 -11  10249. 3023.09   1
  -2  20 -11 8808.59 3146.58   1
   2 -20  12  29774. 7413.67   1
   2 -20  12  25955. 6638.46   1
  -2  20  12  20910. 6123.94   1
   2  20 -12  26801. 6659.04   1
  -2 -20 -12  20887. 7018.06   1
  -2 -20 -12 9698.14 3821.17   1
   2  20  12  29431. 8609.64   1
  -2 -20  12  32037. 7882.45   1
   2 -20 -12  20000. 6039.33   1
  -2  20 -12  26183. 6624.74   1
  -2  20 -12  23462. 6046.19   1
   2 -20  13  17466. 4628.40   1
   2 -20  13  13874. 3969.81   1
  -2  20  13  15751. 5428.76   1
   2  20 -13  22211. 5634.57   1
  -2 -20 -13  14112. 5712.32   1
   2  20  13  15959. 5771.78   1
  -2 -20  13  19931. 5145.20   1
   2 -20 -13  19094. 5872.39   1
  -2  20 -13  12483. 3597.07   1
  -2  20 -13  21544. 5620.85   1
   2 -20  14  14041. 3924.08  -1
   2 -20  14 5922.70 2597.76  -1
  -2  20  14  11104. 4779.32  -1
   2  20 -14 4203.06 1814.77  -1
  -2 -20 -14  759.43 4024.69  -1
   2  20  14 6857.99 4225.93  -1
  -2 -20  14 6178.82 2162.13  -1
   2 -20 -14 5051.45 4116.16  -1
  -2  20 -14 8870.33 2927.05  -1
  -2  20 -14 4436.31 2412.53  -1
   2 -20  15  14642. 4104.73   1
   2 -20  15 6848.84 2611.48   1
  -2  20  15 5168.07 4875.37   1
   2  20 -15 7127.82 2451.40   1
  -2 -20 -15 4697.00 4692.43   1
   2  20  15 1976.67 3821.17   1
  -2 -20  15 7550.87 2469.70   1
   2 -20 -15 5056.02 5008.00   1
  -2  20 -15 9350.55 3073.40   1
  -2  20 -15  11420. 3487.31   1
   2 -20  16  14132. 3978.96   1
   2 -20  16 9764.45 3400.41   1
  -2  20  16  17665. 6652.18   1
   2  20 -16  11111. 3260.92   1
  -2 -20 -16  11159. 5620.85   1
  -2 -20  16  11002. 3258.63   1
   2 -20 -16  15045. 6606.44   1
  -2  20 -16  13597. 3930.94   1
  -2  20 -16  13480. 3990.39   1
   2 -20  17 3519.32 1924.54   1
   2 -20  17  855.25 2353.07   1
  -2  20  17 1798.99 4205.35   1
   2  20 -17  527.33 1506.06   1
  -2 -20  17  510.86 1549.51   1
   2 -20 -17 1253.14 4491.19   1
  -2  20 -17 1552.25 1807.22   1
  -2  20 -17 1159.61 2526.87   1
   2 -20  18  10160. 3151.15   1
   2 -20  18  16371. 4877.65   1
  -2  20  18 8536.47 5428.76   1
   2  20 -18  17903. 4676.42   1
  -2 -20  18 8595.92 2739.54   1
   2 -20 -18 6766.52 5399.03   1
  -2  20 -18  14297. 4054.42   1
  -2  20 -18  12362. 4123.02   1
   2 -20  19 4719.87 2204.21   1
   2 -20  19 9430.59 3635.94   1
  -2  20  19 3402.70 4036.13   1
   2  20 -19 8968.66 2792.13   1
  -2 -20  19 1827.35 1744.11   1
   2 -20 -19 3581.06 5060.59   1
  -2  20 -19 6780.24 2654.93   1
  -2  20 -19 4918.82 3048.25   1
   2 -20  20 1267.78 1866.45   1
   2 -20  20 -527.78 2476.56   1
  -2  20  20 1798.31 3862.33   1
   2  20 -20  769.27 1691.74   1
  -2 -20  20 2577.18 2213.81   1
   2 -20 -20  866.22 4463.75   1
  -2  20 -20 2529.15 1982.62   1
  -2  20 -20  926.37 2702.95   1
   2 -20  21  10345. 3411.84   1
   2 -20  21 7356.50 3215.18   1
  -2  20  21 5497.36 3956.09   1
   2  20 -21  16323. 4616.96   1
  -2 -20  21  11326. 3898.92   1
   2 -20 -21 2510.86 4148.18   1
  -2  20 -21 7589.75 2970.50   1
  -2  20 -21 8957.23 3571.92   1
   2 -20  22  17242. 4882.23  -1
   2 -20  22 5028.58 2705.23  -1
  -2  20  22 2483.42 3651.95  -1
   2  20 -22 7525.72 3025.38  -1
  -2 -20  22 8067.68 3313.51  -1
   2 -20 -22 3475.87 4301.39  -1
  -2  20 -22  13382. 4104.73  -1
  -2  20 -22 2741.82 2709.81  -1
   2 -20  23 8239.19 3130.57   1
   2 -20  23 6805.39 3187.74   1
  -2  20  23 3967.52 4047.56   1
   2  20 -23 9855.92 3633.66   1
  -2 -20  23  12957. 4431.74   1
   2 -20 -23 2938.48 4738.16   1
  -2  20 -23 7532.58 3123.71   1
  -2  20 -23 9833.06 3674.82   1
   2 -20  24 4692.43 2677.79  -1
   2 -20  24 3990.39 2652.64  -1
   2  20 -24 5746.62 2981.93  -1
  -2 -20  24 4975.98 3011.66  -1
   2 -20 -24 4091.01 5040.01  -1
  -2  20 -24 2565.74 2348.50  -1
  -2  20 -24 3775.44 2952.20  -1
   2 -20  25  10162. 3715.98   1
   2  20 -25 5385.31 3377.54   1
  -2 -20  25 6752.79 3455.29   1
  -2  20 -25 9368.85 3475.87   1
   2  22   0 3674.82 1845.41   1
   2  22   0  11180. 3103.13   1
  -2 -22   0 1404.07 1469.93   1
  -2 -22   0 9179.04 2481.13   1
   2 -22   0 3814.31 1956.78   1
   2 -22   0 4971.41 2728.10   1
  -2  22   0 4562.08 2011.89   1
  -2  22   0 7635.48 3192.31   1
   2 -22   1  467.64 1502.86   1
   2 -22   1 -519.09 2558.88   1
  -2  22   1  15875. 4680.99   1
   2  22  -1 5973.01 2109.76   1
  -2 -22  -1  654.70 1531.44   1
  -2 -22  -1 1833.06 1205.81   1
   2  22   1  798.54 1986.73   1
   2  22   1 3190.03 1727.65   1
  -2 -22   1  12003. 3466.72   1
  -2 -22   1 2057.17 1113.88   1
  -2  22  -1  336.61 1478.16   1
  -2  22  -1 1013.49 2160.07   1
   2 -22   2 6334.32 2348.50   1
   2 -22   2 7985.36 3158.01   1
  -2  22   2 7875.59 2801.28   1
   2  22  -2  11784. 3414.13   1
   2  22  -2 6766.52 2225.93   1
  -2 -22  -2  16245. 4678.71   1
  -2 -22  -2  11251. 2977.36   1
   2  22   2 6739.07 2410.24   1
   2  22   2  15820. 4651.26   1
  -2 -22   2  11752. 3411.84   1
  -2 -22   2  11155. 2938.48   1
   2 -22  -2 6693.34 2467.41   1
   2 -22  -2 5732.90 3043.67   1
  -2  22  -2 9233.93 2906.47   1
  -2  22  -2 9755.31 3507.89   1
   2 -22   3 1156.18 1533.04   1
   2 -22   3 3192.31 2586.32   1
   2  22  -3 4900.52 2123.71   1
  -2 -22  -3 4875.37 2529.15   1
  -2 -22  -3 1660.19 1311.00   1
   2  22   3 8220.89 3185.45   1
   2  22   3  247.43 1984.91   1
  -2 -22   3 3690.83 1596.39   1
  -2 -22   3 9021.26 2750.97   1
   2 -22  -3  10750. 3306.65   1
  -2  22  -3  863.94 1523.44   1
  -2  22  -3 9853.64 3501.03   1
   2 -22   4  16840. 4507.20   1
   2 -22   4 9981.70 3446.14   1
  -2  22   4  10830. 3432.42   1
   2  22  -4 8147.72 2664.07   1
   2  22  -4  16215. 4477.47   1
  -2 -22  -4  16634. 4953.12   1
  -2 -22  -4  14507. 3944.66   1
   2  22   4  10016. 3603.93   1
   2  22   4  17606. 5410.47   1
  -2 -22   4  11999. 3432.42   1
  -2 -22   4  14509. 3752.57   1
   2 -22  -4  13314. 3912.64   1
  -2  22  -4  13380. 3786.87   1
  -2  22  -4  21354. 5652.86   1
   2 -22   5 8616.50 2730.39   1
   2 -22   5  15603. 4447.74   1
  -2  22   5  13567. 4145.89   1
   2  22  -5  11829. 3398.12   1
   2  22  -5 9453.46 3199.17   1
  -2 -22  -5  14786. 4454.60   1
  -2 -22  -5  30231. 7637.77   1
   2  22   5  13542. 4189.34   1
   2  22   5  14162. 4594.10   1
  -2 -22   5  22337. 5703.17   1
   2 -22  -5 8618.79 3148.86   1
  -2  22  -5 5179.51 2163.50   1
  -2  22  -5  15426. 4392.86   1
   2 -22   6  13483. 3775.44   1
   2 -22   6  19014. 5101.76   1
  -2  22   6 8627.94 3279.21   1
   2  22  -6  12643. 3503.31   1
  -2 -22  -6  14413. 4507.20   1
  -2 -22  -6  14631. 4459.18   1
   2  22   6 9387.14 3542.19   1
   2  22   6  10739. 4223.64   1
  -2 -22   6  14532. 3889.77   1
   2 -22  -6  11674. 3894.35   1
  -2  22  -6 9622.67 3027.67   1
  -2  22  -6  13938. 3905.78   1
   2 -22   7  29202. 7310.76   1
   2 -22   7  30643. 7633.20   1
  -2  22   7  36291. 9279.66   1
   2  22  -7  34873. 8566.19   1
  -2 -22  -7  20505. 5744.33   1
  -2 -22  -7  29248. 7635.48   1
   2  22   7  38555. 9817.05   1
   2  22   7  34301. 9025.83   1
  -2 -22   7  34393. 8445.00   1
   2 -22  -7  27144. 7258.17   1
  -2  22  -7  29614. 7441.11   1
  -2  22  -7  27190. 6896.86   1
   2 -22   8 4795.33 2024.01  -1
   2 -22   8 8509.02 2844.73  -1
  -2  22   8  11265. 3850.90  -1
   2  22  -8 4523.21 1810.88  -1
  -2 -22  -8 3997.25 3107.70  -1
  -2 -22  -8 -526.87 2741.82  -1
   2  22   8 7676.65 3480.44  -1
   2  22   8 -149.33 3093.98  -1
  -2 -22   8 4694.71 1814.54  -1
   2 -22  -8  10633. 3885.20  -1
  -2  22  -8 4932.54 2092.84  -1
  -2  22  -8 2439.97 2091.01  -1
   2 -22   9  41093.  10087.   1
   2 -22   9  30597. 7656.06   1
  -2  22   9  39172.  10075.   1
   2  22  -9  44340.  10741.   1
  -2 -22  -9  23439. 6396.06   1
  -2 -22  -9  32998. 9071.57   1
   2  22   9  41756.  11153.   1
   2  22   9  32060. 8554.76   1
  -2 -22   9  31786. 7841.29   1
   2 -22  -9  27098. 7431.96   1
  -2  22  -9  43448.  10627.   1
  -2  22  -9  27876. 7082.09   1
   2 -22  10  183.54 1490.97   1
   2 -22  10 1775.90 1882.00   1
  -2  22  10 3091.70 2938.48   1
   2  22 -10 1049.62 1288.13   1
  -2 -22 -10 4708.43 4203.06   1
  -2 -22 -10 1283.79 2641.20   1
   2  22  10 1390.12 4402.01   1
  -2 -22  10  114.27 1218.84   1
   2 -22 -10 3930.94 3068.83   1
  -2  22 -10 2391.95 1826.89   1
  -2  22 -10 3174.02 2273.04   1
   2 -22  11  18603. 4953.12   1
   2 -22  11  19325. 5225.24   1
  -2  22  11  17949. 5424.19   1
   2  22 -11  18429. 4811.34   1
  -2 -22 -11  23965. 7848.15   1
  -2 -22 -11 7784.12 3425.56   1
   2  22  11  34896.  10027.   1
  -2 -22  11  23394. 5934.14   1
   2 -22 -11  13860. 4770.18   1
  -2  22 -11  20700. 5383.03   1
  -2  22 -11  20050. 5442.48   1
   2 -22  12  11123. 3338.67   1
   2 -22  12  12442. 3722.84   1
  -2  22  12  18578. 5684.88   1
   2  22 -12  15010. 4020.12   1
  -2 -22 -12  10883. 5570.54   1
   2  22  12  11738. 5428.76   1
  -2 -22  12  10755. 3137.43   1
   2 -22 -12  17697. 5559.11   1
  -2  22 -12  10492. 3196.89   1
  -2  22 -12  15173. 4397.43   1
   2 -22  13  25635. 6508.11  -1
   2 -22  13  10037. 3434.71  -1
  -2  22  13  11393. 4532.35  -1
   2  22 -13  14727. 3926.36  -1
  -2 -22 -13  10139. 5371.59  -1
   2  22  13 7692.65 4671.85  -1
  -2 -22  13  11839. 3379.83  -1
   2 -22 -13  11777. 4841.07  -1
  -2  22 -13  19140. 5058.31  -1
  -2  22 -13  15152. 4408.87  -1
   2 -22  14 5481.36 2254.06   1
   2 -22  14 5730.61 2622.91   1
  -2  22  14  14832. 5593.41   1
   2  22 -14 5323.57 2051.45   1
  -2 -22 -14  13044. 5767.20   1
   2  22  14  10633. 5076.60   1
  -2 -22  14  10389. 3089.41   1
   2 -22 -14  11114. 4825.06   1
  -2  22 -14 9839.92 3082.55   1
  -2  22 -14 7226.15 2945.34   1
   2 -22  15 4491.19 2136.06  -1
   2 -22  15 -1059.7 2132.17  -1
  -2  22  15 3761.72 4358.56  -1
   2  22 -15 2177.45 1571.69  -1
  -2 -22 -15 1804.02 4013.26  -1
   2  22  15 6473.81 4612.39  -1
  -2 -22  15 5088.04 2123.03  -1
   2 -22 -15 6062.19 4527.78  -1
  -2  22 -15 2203.29 1864.39  -1
  -2  22 -15 3249.48 2176.54  -1
   2 -22  16 6723.07 2510.86   1
   2 -22  16  12015. 3665.67   1
  -2  22  16 4337.98 4123.02   1
   2  22 -16 4790.76 1997.94   1
  -2 -22 -16 1476.33 4132.17   1
   2  22  16 3722.84 4157.33   1
  -2 -22  16 4909.67 2159.39   1
   2 -22 -16 3139.72 4584.95   1
  -2  22 -16  11201. 3450.72   1
  -2  22 -16 5476.78 2675.51   1
   2 -22  17 2002.51 1863.48   1
   2 -22  17 3244.91 2200.09   1
  -2  22  17 -772.24 3750.28   1
   2  22 -17 1534.19 1591.13   1
  -2 -22 -17  386.69 3821.17   1
   2  22  17 1235.99 3514.75   1
  -2 -22  17 1250.40 1652.18   1
   2 -22 -17   69.31 4235.07   1
  -2  22 -17 2128.51 1935.28   1
  -2  22 -17 4973.70 2666.36   1
   2 -22  18 5202.37 2435.40   1
   2 -22  18 8223.18 3151.15   1
  -2  22  18 2075.23 3549.05   1
   2  22 -18  10915. 3354.67   1
  -2 -22 -18  791.68 3651.95   1
  -2 -22  18  12662. 3715.98   1
   2 -22 -18 6553.85 4594.10   1
  -2  22 -18 9229.35 3247.20   1
  -2  22 -18 6910.58 2792.13   1
   2 -22  19 1872.40 2003.43  -1
   2 -22  19 5675.73 2815.00  -1
  -2  22  19  775.67 3629.08  -1
   2  22 -19 8712.55 2961.35  -1
  -2 -22  19 1153.44 1906.70  -1
   2 -22 -19  330.89 4058.99  -1
  -2  22 -19 2375.94 2085.52  -1
  -2  22 -19 1748.00 2230.05  -1
   2 -22  20 1148.41 1995.42   1
   2 -22  20  173.79 2499.43   1
  -2  22  20 -277.15 4283.10   1
   2  22 -20 1523.67 1760.80   1
  -2 -22  20 2691.51 2136.75   1
   2 -22 -20 -228.40 4328.83   1
  -2  22 -20 2158.47 2221.81   1
  -2  22 -20  453.46 2556.59   1
   2 -22  21 6643.03 2739.54  -1
   2 -22  21 3576.49 2648.07  -1
  -2  22  21 4100.16 4596.38  -1
   2  22 -21 3919.50 2102.22  -1
  -2 -22  21 3025.38 2068.14  -1
   2 -22 -21  446.38 4978.27  -1
  -2  22 -21 2860.73 2272.12  -1
  -2  22 -21 2382.80 2897.32  -1
   2 -22  22 2835.58 2142.01   1
  -2  22  22 1693.57 4854.79   1
   2  22 -22 3866.91 2391.95   1
  -2 -22  22  245.14 2117.99   1
   2 -22 -22 2632.06 6165.10   1
  -2  22 -22 1369.54 2119.14   1
   2  24   0 3473.58 2016.92   1
   2  24   0 1355.13 1632.06   1
  -2 -24   0  399.73 1709.81   1
  -2 -24   0 1360.16 1179.97   1
   2 -24   0 1173.11 1885.66   1
   2 -24   0 3279.21 2197.80   1
  -2  24   0  917.45 1699.98   1
  -2  24   0 6970.04 2577.18   1
   2 -24   1  737.94 1871.71  -1
   2 -24   1 1309.85 1796.25  -1
  -2  24   1 3917.22 2283.78  -1
  -2  24   1 6942.60 2801.28  -1
   2  24  -1 1805.62 1936.88  -1
   2  24  -1 1637.09 1595.01  -1
  -2 -24  -1 1686.25 1205.12  -1
  -2 -24  -1 1276.01 1863.25  -1
   2  24   1  926.59 1898.69  -1
   2  24   1 4781.61 2061.28  -1
  -2 -24   1 3681.68 2236.22  -1
  -2 -24   1 5920.42 1781.84  -1
   2 -24  -1 5465.35 2494.85  -1
   2 -24  -1   26.30 1977.59  -1
  -2  24  -1 1638.69 1833.29  -1
  -2  24  -1  686.94 1746.40  -1
   2 -24   2 3233.47 2124.17   1
   2 -24   2 6046.19 2602.33   1
  -2  24   2 4900.52 2520.01   1
   2  24  -2 4136.74 2019.66   1
   2  24  -2 3944.66 1806.77   1
  -2 -24  -2 4861.65 1720.10   1
  -2 -24  -2 3510.17 2691.51   1
   2  24   2 4632.97 2865.31   1
   2  24   2 2389.66 2300.48   1
  -2 -24   2 3606.22 2020.12   1
  -2 -24   2 2970.50 1227.76   1
   2 -24  -2 2716.67 2104.50   1
   2 -24  -2 3420.99 2273.95   1
  -2  24  -2 2193.00 1911.27   1
  -2  24  -2 2019.21 2026.52   1
   2 -24   3 1803.34 1841.53   1
   2 -24   3 4703.86 2391.95   1
  -2  24   3 2011.20 2056.02   1
   2  24  -3 7592.03 2741.82   1
   2  24  -3 2659.50 1606.22   1
  -2 -24  -3 1488.91 1497.14   1
  -2 -24  -3 4427.16 2865.31   1
   2  24   3 1304.14 2403.38   1
   2  24   3 -862.56 2712.09   1
  -2 -24   3 1571.69 1938.71   1
  -2 -24   3 2554.31 1137.89   1
   2 -24  -3 1583.58 1987.42   1
  -2  24  -3 1768.12 1835.58   1
  -2  24  -3 2565.74 2088.72   1
   2 -24   4  15319. 4395.15   1
   2 -24   4  13320. 3949.23   1
  -2  24   4  14891. 4479.76   1
   2  24  -4  20027. 5275.55   1
   2  24  -4 9926.81 2927.05   1
  -2 -24  -4  17487. 5597.98   1
  -2 -24  -4  15792. 4296.82   1
   2  24   4  16963. 5337.29   1
   2  24   4  17375. 5415.04   1
  -2 -24   4  14738. 4155.04   1
  -2 -24   4  14283. 3574.20   1
   2 -24  -4  16407. 4726.73   1
  -2  24  -4  13405. 3937.80   1
  -2  24  -4  23462. 6025.61   1
   2 -24   5 3194.60 2090.33   1
   2 -24   5 5943.28 2561.17   1
  -2  24   5 3848.61 2632.06   1
   2  24  -5 7960.20 2778.41   1
   2  24  -5 2666.36 1777.04   1
  -2 -24  -5  11807. 4550.65   1
  -2 -24  -5 3777.72 2283.56   1
   2  24   5 5618.56 3368.39   1
   2  24   5 7717.81 3777.72   1
  -2 -24   5 3359.25 1996.80   1
   2 -24  -5 3946.94 2737.25   1
  -2  24  -5 6110.22 2410.24   1
  -2  24  -5 4459.18 2385.09   1
   2 -24   6 7450.26 2602.33   1
   2 -24   6  12810. 3761.72   1
  -2  24   6  19014. 5613.99   1
   2  24  -6  11386. 3377.54   1
  -2 -24  -6 7754.39 3681.68   1
  -2 -24  -6 6979.18 2867.59   1
   2  24   6  10188. 4198.49   1
   2  24   6  17603. 5371.59   1
  -2 -24   6  15683. 4331.12   1
   2 -24  -6 7123.25 3487.31   1
  -2  24  -6  10085. 3171.73   1
  -2  24  -6 7356.50 2730.39   1
   2 -24   7 1361.08 1595.70   1
   2 -24   7 2262.29 1922.71   1
  -2  24   7 1107.93 2586.32   1
   2  24  -7  992.68 1398.35   1
  -2 -24  -7 1756.69 2869.88   1
  -2 -24  -7 1865.54 2325.63   1
   2  24   7 1340.27 2648.07   1
   2  24   7  294.31 2847.01   1
  -2 -24   7 2833.29 1643.72   1
   2 -24  -7 1233.25 2714.38   1
  -2  24  -7  753.49 1679.85   1
  -2  24  -7  996.34 1671.16   1
   2 -24   8 3695.40 1922.02   1
   2 -24   8 2298.19 1740.68   1
  -2  24   8 1826.43 2675.51   1
   2  24  -8 3727.41 1809.97   1
  -2 -24  -8 8241.47 4168.76   1
  -2 -24  -8 2389.66 2191.17   1
   2  24   8 9778.17 3969.81   1
   2  24   8 2627.48 2762.40   1
  -2 -24   8 3766.29 1848.84   1
   2 -24  -8 1354.45 2899.61   1
  -2  24  -8 3494.17 1886.35   1
  -2  24  -8 3857.76 1986.28   1
   2 -24   9 3226.61 1785.50  -1
   2 -24   9 5403.61 2197.12  -1
  -2  24   9 4902.81 3384.40  -1
   2  24  -9 9142.46 2766.98  -1
  -2 -24  -9 3782.30 3757.14  -1
  -2 -24  -9 2600.04 2341.64  -1
   2  24   9 7146.12 4091.01  -1
  -2 -24   9 5627.71 2162.36  -1
   2 -24  -9 1806.77 3103.13  -1
  -2  24  -9 4461.46 2082.78  -1
  -2  24  -9 9256.79 2922.48  -1
   2 -24  10 4214.49 1984.68   1
   2 -24  10 4294.53 2102.22   1
  -2  24  10 6142.23 3437.00   1
   2  24 -10 4184.77 1717.58   1
  -2 -24 -10 4193.91 3967.52   1
  -2 -24 -10 1773.61 2113.19   1
   2  24  10 7502.85 4509.49   1
  -2 -24  10 6183.39 2174.48   1
   2 -24 -10 2913.33 3254.06   1
  -2  24 -10 6338.89 2375.94   1
  -2  24 -10 4161.90 2096.96   1
   2 -24  11 3331.81 1825.75   1
   2 -24  11 6023.32 2645.78   1
  -2  24  11  10075. 4223.64   1
   2  24 -11 3748.00 1648.29   1
  -2 -24 -11  10924. 5222.95   1
   2  24  11 2931.62 4209.92   1
  -2 -24  11 3482.73 1679.62   1
   2 -24 -11 4358.56 3729.70   1
  -2  24 -11 3107.70 1853.65   1
  -2  24 -11 5072.03 2314.20   1
   2 -24  12 2705.23 1809.97   1
   2 -24  12 2056.25 2163.96   1
  -2  24  12 1856.85 3016.23   1
   2  24 -12 3368.39 1625.88   1
  -2 -24 -12 1609.65 4225.93   1
   2  24  12  895.49 3972.10   1
  -2 -24  12 2145.21 1680.77   1
   2 -24 -12 1002.97 3185.45   1
  -2  24 -12 2517.72 1789.62   1
  -2  24 -12 4653.55 2494.85   1
   2 -24  13 3128.28 2008.23   1
   2 -24  13 3322.66 2246.05   1
  -2  24  13 3052.82 3494.17   1
   2  24 -13 3770.86 1942.83   1
  -2 -24 -13 4166.47 3997.25   1
   2  24  13 4431.74 3702.26   1
  -2 -24  13 9021.26 2940.77   1
   2 -24 -13 3645.09 3610.79   1
  -2  24 -13 3681.68 2149.78   1
  -2  24 -13 6551.56 2698.37   1
   2 -24  14 5890.69 2453.69   1
   2 -24  14  419.85 1830.55   1
  -2  24  14  363.59 3023.09   1
   2  24 -14 2652.64 1832.15   1
  -2 -24 -14  926.14 3715.98   1
   2  24  14 1019.67 3501.03   1
  -2 -24  14 5120.05 2311.91   1
   2 -24 -14 1194.83 3661.10   1
  -2  24 -14 5227.53 2444.54   1
  -2  24 -14 1417.56 2112.51   1
   2 -24  15 3773.15 2233.93   1
   2 -24  15 1705.92 2143.15   1
  -2  24  15 3018.52 3711.41   1
   2  24 -15 6887.71 2487.99   1
  -2 -24 -15  211.16 3933.22   1
   2  24  15  857.99 3741.14   1
  -2 -24  15 1361.99 1892.06   1
   2 -24 -15 3336.38 3642.80   1
  -2  24 -15 3338.67 2165.33   1
  -2  24 -15 1115.48 2102.22   1
   2 -24  16 1929.34 2001.60   1
   2 -24  16 1794.19 2387.37   1
  -2  24  16 2346.21 3736.56   1
   2  24 -16 9323.11 2997.94   1
  -2 -24 -16 1035.44 4225.93   1
   2  24  16  499.43 4212.21   1
  -2 -24  16 4809.05 2364.51   1
   2 -24 -16 2947.63 3994.97   1
  -2  24 -16 6066.77 2657.21   1
  -2  24 -16 2961.35 2210.61   1
   2 -24  17 2645.78 2089.64   1
   2 -24  17  839.70 2187.28   1
  -2  24  17  412.30 4187.05   1
   2  24 -17  533.73 1638.00   1
  -2 -24 -17 1585.87 4546.07   1
   2  24  17 1810.20 4161.90   1
  -2 -24  17 2128.51 1849.76   1
   2 -24 -17  455.06 4461.46   1
  -2  24 -17 2112.74 2137.20   1
  -2  24 -17 2805.85 2311.91   1
   2 -24  18 6480.67 2625.20   1
   2 -24  18 1811.80 2455.98   1
  -2  24  18 7294.76 6057.62   1
   2  24 -18 5421.90 2428.54   1
  -2 -24 -18 3930.94 5344.15   1
   2  24  18 4943.97 5197.80   1
  -2 -24  18 4555.22 2214.27   1
   2 -24 -18 4104.73 5675.73   1
  -2  24 -18 4907.38 2531.44   1
  -2  24 -18 7685.79 3386.69   1
   2  26   0 5021.72 2664.07   1
   2  26   0 2796.70 1549.05   1
  -2 -26   0 2198.03 2373.65   1
  -2 -26   0 2200.55 1187.51   1
   2 -26   0 1459.18 2108.16   1
   2 -26   0 -214.18 2161.44   1
  -2  26   0 1356.28 1992.91   1
  -2  26   0 1413.67 2017.38   1
   2 -26   1 4436.31 2396.52   1
   2 -26   1  955.64 2193.00   1
  -2  26   1 2741.82 2398.81   1
  -2  26   1  989.02 1870.11   1
   2  26  -1 3174.02 2275.32   1
   2  26  -1 1902.35 1390.12   1
  -2 -26  -1 3327.23 1365.19   1
  -2 -26  -1  127.99 2394.24   1
   2  26   1  996.57 2088.95   1
   2  26   1 3366.11 1820.49   1
  -2 -26   1 3725.13 2501.71   1
  -2 -26   1 1974.16 1049.39   1
   2 -26  -1 2127.60 2195.06   1
   2 -26  -1 4159.61 2262.29   1
  -2  26  -1 2162.59 2126.46   1
  -2  26  -1 2414.82 2173.79   1
   2 -26   2 2453.69 2103.13   1
   2 -26   2 3171.73 2366.79   1
  -2  26   2 5611.70 2652.64   1
   2  26  -2 6208.55 2524.58   1
   2  26  -2 4207.63 1698.37   1
  -2 -26  -2 4225.93 2693.80   1
  -2 -26  -2 2049.39 1300.02   1
   2  26   2 7962.49 2952.20   1
   2  26   2 4479.76 2808.14   1
  -2 -26   2 4454.60 2396.52   1
  -2 -26   2 2394.24 1128.74   1
   2 -26  -2 3363.82 2337.07   1
   2 -26  -2 4262.52 2293.62   1
  -2  26  -2 2744.11 2157.78   1
  -2  26  -2 3917.22 2382.80   1
   2 -26   3 1664.76 2061.74   1
   2 -26   3 1524.58 2156.18   1
  -2  26   3 2700.66 2403.38   1
   2  26  -3  794.65 1748.23   1
   2  26  -3 2198.03 1419.16   1
  -2 -26  -3  653.56 1421.91   1
  -2 -26  -3 3679.39 3091.70   1
   2  26   3 1997.48 2337.07   1
   2  26   3 2217.47 2798.99   1
  -2 -26   3  334.32 1858.68   1
  -2 -26   3  623.83 965.926   1
   2 -26  -3 4004.11 2652.64   1
  -2  26  -3 2212.67 2237.59   1
  -2  26  -3 1269.61 2093.76   1
   2 -26   4 1434.48 2011.20   1
   2 -26   4 8568.48 3084.84   1
  -2  26   4 1690.14 2460.55   1
   2  26  -4 5506.51 2574.89   1
   2  26  -4 2856.16 1635.72   1
  -2 -26  -4 3304.36 1812.03   1
  -2 -26  -4 3450.72 3247.20   1
   2  26   4 3176.31 3352.39   1
   2  26   4 1943.52 2483.42   1
  -2 -26   4 2001.37 1105.42   1
  -2 -26   4 3510.17 2389.66   1
   2 -26  -4 2892.75 2437.68   1
  -2  26  -4 2158.70 2042.99   1
  -2  26  -4 4562.08 2442.26   1
   2 -26   5 4132.17 2277.61   1
   2 -26   5 2346.21 2160.53   1
  -2  26   5 1018.06 2588.61   1
   2  26  -5 1919.28 1601.19   1
   2  26  -5 3603.93 2270.98   1
  -2 -26  -5 1598.44 3658.81   1
  -2 -26  -5 2281.04 1825.06   1
   2  26   5 3249.48 3485.02   1
   2  26   5  175.65 2428.54   1
  -2 -26   5 5335.01 2570.32   1
   2 -26  -5 3039.10 2702.95   1
  -2  26  -5 2467.41 2073.86   1
  -2  26  -5 2111.36 2115.48   1
   2 -26   6 2260.69 1899.38   1
   2 -26   6 2739.54 2100.84   1
  -2  26   6 1349.42 3041.39   1
   2  26  -6 4157.33 2254.29   1
  -2 -26  -6 4404.29 3830.32   1
  -2 -26  -6  133.68 1748.45   1
   2  26   6 5593.41 3709.12   1
   2  26   6 1020.58 2499.43   1
  -2 -26   6 3288.36 2004.11   1
   2 -26  -6 2013.03 2874.45   1
  -2  26  -6 3651.95 2202.38   1
  -2  26  -6 7923.61 2869.88   1
   2 -26   7 6258.86 2627.48   1
   2 -26   7 9462.60 3123.71   1
  -2  26   7 7825.28 3777.72   1
   2  26  -7 8012.80 2741.82   1
  -2 -26  -7  13995. 5188.65   1
  -2 -26  -7 5019.43 2282.41   1
   2  26   7 6638.46 3860.05   1
  -2 -26   7 9746.16 3123.71   1
   2 -26  -7 6393.77 3731.99   1
  -2  26  -7  10789. 3512.46   1
  -2  26  -7 6716.21 2645.78   1
   2 -26   8 3238.05 2096.50   1
   2 -26   8  957.92 1899.84   1
  -2  26   8 1352.39 2835.58   1
   2  26  -8 2348.50 1758.06   1
  -2 -26  -8   89.66 3185.45   1
  -2 -26  -8 1514.98 1888.18   1
   2  26   8 1882.00 3222.04   1
  -2 -26   8 1965.01 1727.65   1
   2 -26  -8  911.96 2938.48   1
  -2  26  -8 2812.71 2106.33   1
  -2  26  -8 3158.01 2103.13   1
   2 -26   9 5876.97 2556.59  -1
   2 -26   9 3940.08 2205.58  -1
  -2  26   9 6229.13 3553.62  -1
   2  26  -9 2789.84 1783.90  -1
  -2 -26  -9 4445.46 3597.07  -1
  -2 -26  -9  851.36 1844.73  -1
   2  26   9 4745.02 3599.36  -1
  -2 -26   9 6201.69 2373.65  -1
   2 -26  -9 5540.81 3510.17  -1
  -2  26  -9  10149. 3324.95  -1
  -2  26  -9 3603.93 2158.01  -1
   2 -26  10 3324.95 2074.78   1
   2 -26  10 2904.18 2083.46   1
  -2  26  10  645.55 2718.95   1
   2  26 -10  144.13 1493.71   1
  -2 -26 -10 1998.63 3523.89   1
   2  26  10 1605.30 3519.32   1
  -2 -26  10 4873.08 2239.42   1
   2 -26 -10  121.91 3183.17   1
  -2  26 -10 2972.78 2133.09   1
  -2  26 -10 1969.81 1945.34   1
   2 -26  11 7866.45 2828.72   1
   2 -26  11 8739.99 3059.68   1
  -2  26  11 4488.90 3231.19   1
   2  26 -11 6528.69 2348.50   1
  -2 -26 -11 7969.35 4127.60   1
   2  26  11 6217.69 4678.71   1
  -2 -26  11  10446. 3240.34   1
   2 -26 -11 5472.21 3594.78   1
  -2  26 -11  13048. 3866.91   1
  -2  26 -11 4143.60 2332.49   1
   2 -26  12    2.84 1530.07   1
   2 -26  12 -461.47 2024.24   1
  -2  26  12 1866.68 3123.71   1
   2  26 -12  203.66 1372.28   1
  -2 -26 -12 -199.93 4212.21   1
   2  26  12 1678.94 4408.87   1
  -2 -26  12  364.05 1567.57   1
   2 -26 -12  753.03 3082.55   1
  -2  26 -12 1656.30 1655.38   1
  -2  26 -12  856.62 2049.16   1
   3   1   0  11228. 3473.58   1
  -3  -1   0 7315.34 1825.98   1
  -3  -1   0  19341. 5145.20   1
   3  -1   0  10750. 2670.93   1
   3  -1   0  22497. 5876.97   1
  -3   1   0 4911.96 1374.57   1
  -3   1   0  34370. 8513.60   1
   3  -1   1  44455.  10524.   1
   3  -1   1  35765. 8877.19   1
  -3   1   1  93117.  21941.   1
   3   1  -1  56414.  13304.   1
   3   1  -1  28859. 7331.34   1
  -3  -1  -1  66499.  15946.   1
  -3  -1  -1  56780.  13407.   1
   3   1   1  52664.  12733.   1
   3   1   1  58975.  13915.   1
  -3  -1   1  47679.  11258.   1
  -3  -1   1  48822.  11887.   1
   3  -1  -1  70021.  16524.   1
  -3   1  -1  41390. 9814.76   1
  -3   1  -1  31717. 7916.75   1
   3  -1   2  33753. 8037.95   1
   3  -1   2  23142. 6005.03   1
  -3   1   2  34782. 8275.78   1
  -3   1   2  19138. 5188.65   1
   3   1  -2  34713. 8223.18   1
   3   1  -2  24903. 6400.63   1
  -3  -1  -2  34256. 8461.00   1
  -3  -1  -2  27167. 6514.97   1
   3   1   2  22666. 5472.21   1
   3   1   2  29179. 7331.34   1
  -3  -1   2  31237. 7413.67   1
  -3  -1   2  38395. 9467.18   1
   3  -1  -2  31374. 7479.98   1
   3  -1  -2  19758. 5360.16   1
  -3   1  -2  44798.  10631.   1
  -3   1  -2  52184.  12616.   1
   3  -1   3 136680.  32175.   1
   3  -1   3 148342.  35056.   1
  -3   1   3 112028.  26389.   1
  -3   1   3 102470.  24354.   1
   3   1  -3 113080.  26618.   1
   3   1  -3  79739.  19046.   1
  -3  -1  -3 160828.  37892.   1
  -3  -1  -3 107135.  25383.   1
   3   1   3  98788.  23439.   1
   3   1   3 134393.  31672.   1
  -3  -1   3 100137.  23576.   1
  -3  -1   3  98994.  23531.   1
   3  -1  -3 111777.  26343.   1
   3  -1  -3 103956.  24720.   1
  -3   1  -3 126824.  29865.   1
  -3   1  -3 107478.  25452.   1
   3  -1   4  29636. 7148.40   1
   3  -1   4  24011. 6155.95   1
  -3   1   4  68305.  16149.   1
  -3   1   4  40636. 9958.83   1
   3   1  -4  29934. 7221.58   1
   3   1  -4  36520. 9073.85   1
  -3  -1  -4  33318. 8060.82   1
  -3  -1  -4  28356. 7047.79   1
   3   1   4  15715. 4264.80   1
   3   1   4  26778. 6480.67   1
  -3  -1   4  28859. 6915.15   1
  -3  -1   4  37686. 9329.97   1
   3  -1  -4  38257. 9137.88   1
   3  -1  -4  34827. 8659.95   1
  -3   1  -4  26069. 6528.69   1
   3  -1   5 133341.  31466.   1
   3  -1   5 112234.  26595.   1
  -3   1   5 129659.  30574.   1
  -3   1   5 116053.  27510.   1
   3   1  -5  99886.  23599.   1
   3   1  -5 109398.  25978.   1
  -3  -1  -5  92202.  21880.   1
  -3  -1  -5  81454.  19307.   1
   3   1   5 105968.  25131.   1
  -3  -1   5  90464.  21560.   1
   3  -1  -5 120146.  28402.   1
   3  -1  -5  95975.  22856.   1
  -3   1  -5 126732.  29934.   1
  -3   1  -5  82186.  19540.   1
   3  -1   6 200000.  47084.   1
   3  -1   6 199954.  47107.   1
  -3   1   6 221747.  52184.   1
  -3  -1  -6 246284.  57946.   1
   3   1   6 219849.  51772.   1
   3  -1  -6 270066.  63549.   1
  -3   1  -6 224720.  52938.   1
  -3   1  -6 186988.  44043.   1
   3  -1   7 127098.  30002.   1
   3  -1   7  74983.  17928.   1
  -3  -1  -7 109261.  25886.   1
   3   1   7 119392.  28264.   1
   3  -1  -7  59318.  14226.   1
  -3   1  -7 133135.  31466.   1
  -3   1  -7 112577.  26618.   1
   3  -1   8  25726. 6302.30   1
   3  -1   8  44958.  10988.   1
  -3  -1  -8  85799.  20428.   1
   3   1   8  41733.  10245.   1
  -3   1  -8  35285. 8584.49   1
   3  -1   9  19174. 5154.35   1
  -3  -1  -9  26000. 6542.41   1
   3   1   9  38395. 9426.01   1
  -3   1  -9  22678. 5659.72   1
   3  -1  10  23233. 5993.59   1
  -3  -1 -10  16792. 4566.65   1
   3   1  10  12589. 3784.58   1
   3  -1  11  37228. 9233.93   1
  -3  -1 -11  24217. 6160.52   1
   3   1  11  24994. 6352.61   1
   3  -1  12  56757.  13663.   1
  -3  -1 -12  46993.  11409.   1
   3   1  12  45758.  11159.   1
   3  -1  13 4369.99 2325.63   1
  -3  -1 -13 7891.60 2778.41   1
   3   1  13  16261. 4534.64   1
   3  -1  14  46444.  11393.   1
  -3  -1 -14  40064. 9862.79   1
   3   1  14  41779.  10277.   1
   3  -1  15  43243.  10704.   1
  -3  -1 -15  66819.  16078.   1
   3   1  15  72467.  17430.   1
   3  -1  16  43494.  10828.   1
  -3  -1 -16  40704.  10103.   1
   3   1  16  40384.  10078.   1
   3  -1  17  36039. 9222.49  -1
  -3  -1 -17  35079. 8961.80  -1
   3   1  17  27190. 7292.47  -1
   3  -1  18 4372.28 3162.59   1
  -3  -1 -18 9990.84 3965.24   1
   3   1  18 9638.68 4047.56   1
  -3   1 -18 -444.32 2076.60   1
   3  -1  19  30025. 7903.03   1
  -3  -1 -19  34256. 8879.48   1
   3   1  19  29614. 8040.24   1
  -3   1 -19  31351. 8104.27   1
   3  -1  20  11029. 4326.54   1
  -3  -1 -20  17489. 5588.83   1
   3   1  20  16762. 5296.13   1
  -3   1 -20  15923. 4996.56   1
   3  -1  21  30368. 8124.85   1
  -3  -1 -21  36588. 9622.67   1
   3   1  21  36634. 9638.68   1
  -3   1 -21  27075. 7308.48   1
   3  -1  22 2421.68 3251.77   1
  -3  -1 -22 -442.72 3494.17   1
   3   1  22  426.48 3018.52   1
  -3   1 -22 2876.74 3427.85   1
   3  -1  23 4241.94 3212.89   1
  -3  -1 -23 4411.15 3469.01   1
   3   1  23  10050. 4363.13   1
  -3   1 -23 4662.70 3446.14   1
   3  -1  24 8854.33 4104.73   1
  -3  -1 -24 2529.15 3361.53   1
   3   1  24 1266.63 3450.72   1
  -3   1 -24 4175.62 3206.03   1
   3  -1  25  18635. 5982.16   1
  -3  -1 -25  15639. 5545.39   1
   3   1  25  22625. 6773.38   1
  -3   1 -25  20821. 6380.05   1
   3  -1  26 8751.42 4171.05   1
  -3  -1 -26  13350. 5033.15   1
   3   1  26  11242. 4587.24   1
  -3   1 -26 7688.08 4223.64   1
   3  -1  27 1429.45 3066.54   1
  -3  -1 -27 1156.18 3283.78   1
   3   1  27 2563.46 3489.59   1
  -3   1 -27 8982.38 4214.49   1
   3  -1  28 3665.67 3286.07   1
  -3  -1 -28 -1354.9 3034.53   1
   3   1  28 4978.27 3553.62   1
  -3   1 -28 3036.81 3466.72   1
   3  -1  29 3574.20 3126.00   1
  -3  -1 -29 -1070.2 2778.41   1
   3   1  29 1578.55 3098.56   1
  -3   1 -29 1970.50 3121.42   1
   3  -1  30 4660.41 3041.39   1
  -3  -1 -30 -528.24 2590.90   1
   3   1  30 1271.67 2922.48   1
  -3   1 -30 1079.35 2867.59   1
   3  -1  31 4173.33 2929.34   1
  -3  -1 -31   58.04 2620.62   1
   3   1  31 3080.26 3025.38   1
  -3   1 -31 1191.17 2888.17   1
   3  -1  32 1095.81 2648.07  -1
  -3  -1 -32  -94.17 2728.10  -1
   3   1  32  380.29 2677.79  -1
  -3   1 -32  124.99 2920.19  -1
   3   3   0 127738.  30139.   1
   3   3   0 159616.  37663.   1
  -3  -3   0 179236.  42259.   1
  -3  -3   0 178001.  41985.   1
   3  -3   0 175349.  41253.   1
   3  -3   0 168763.  39858.   1
  -3   3   0 161719.  38052.   1
  -3   3   0 157741.  37274.   1
   3  -3   1  91356.  21541.   1
   3  -3   1  98765.  23485.   1
  -3   3   1  78390.  18509.   1
  -3   3   1  75669.  18091.   1
   3   3  -1 111594.  26458.   1
   3   3  -1  91859.  21740.   1
  -3  -3  -1  78184.  18466.   1
  -3  -3  -1  83558.  19899.   1
   3   3   1 156186.  36863.   1
  -3  -3   1 103773.  24651.   1
  -3  -3   1  82278.  19465.   1
   3  -3  -1  87057.  20542.   1
   3  -3  -1  83490.  19968.   1
  -3   3  -1 111182.  26183.   1
  -3   3  -1  93986.  22376.   1
   3  -3   2  60302.  14267.   1
   3  -3   2  89778.  21393.   1
  -3   3   2  57443.  13608.   1
  -3   3   2  41207.  10107.   1
   3   3  -2  55797.  13229.   1
   3   3  -2  65584.  15760.   1
  -3  -3  -2  52527.  12659.   1
   3   3   2  56963.  13691.   1
  -3  -3   2  49440.  11720.   1
  -3  -3   2  53579.  12984.   1
   3  -3  -2  45438.  10798.   1
   3  -3  -2  69906.  16821.   1
  -3   3  -2  52184.  12371.   1
  -3   3  -2  75326.  18017.   1
   3  -3   3  13739. 3427.85   1
   3  -3   3  35605. 8820.02   1
  -3   3   3 8689.68 2321.06   1
   3   3  -3 8790.30 2281.96   1
   3   3  -3  14004. 4052.13   1
  -3  -3  -3 9910.81 2972.78   1
   3   3   3  14496. 3960.66   1
  -3  -3   3  16712. 4632.97   1
   3  -3  -3  18328. 4532.35   1
   3  -3  -3  16309. 4678.71   1
  -3   3  -3  12367. 3137.43   1
  -3   3  -3  20823. 5460.78   1
   3  -3   4  33958. 8145.43   1
   3  -3   4  31900. 7964.78   1
  -3   3   4  43517.  10380.   1
   3   3  -4  52412.  12678.   1
  -3  -3  -4  34256. 8419.84   1
   3   3   4  47084.  11388.   1
  -3  -3   4  40979.  10027.   1
   3  -3  -4  40773. 9748.45   1
   3  -3  -4  47862.  11713.   1
  -3   3  -4  35559. 8538.75   1
  -3   3  -4  44432.  10810.   1
   3  -3   5  52138.  12403.   1
   3  -3   5  37411. 9213.35   1
  -3   3   5  43631.  10430.   1
   3   3  -5  43060.  10551.   1
  -3  -3  -5  62085.  14875.   1
  -3  -3   5  54059.  13053.   1
   3  -3  -5  46055.  11013.   1
   3  -3  -5  80585.  19289.   1
  -3   3  -5  73428.  17411.   1
  -3   3  -5  53350.  12877.   1
   3  -3   6  19341. 4806.76   1
   3  -3   6  23142. 5977.58   1
  -3   3   6  22831. 5694.03   1
  -3  -3  -6  30917. 7681.22   1
   3   3   6  43814.  10665.   1
   3  -3  -6  23965. 6055.33   1
  -3   3  -6  30162. 7338.20   1
  -3   3  -6  22021. 5728.33   1
   3  -3   7 145049.  34210.   1
   3  -3   7  84930.  20254.   1
  -3   3   7 126572.  29934.   1
  -3  -3  -7 115801.  27418.   1
   3   3   7 112257.  26595.   1
   3  -3  -7 151841.  35925.   1
  -3   3  -7 172444.  40659.   1
  -3   3  -7  90144.  21434.   1
   3  -3   8 101120.  23942.   1
   3  -3   8  87537.  20853.   1
  -3   3   8  57032.  13700.   1
  -3  -3  -8  71964.  17185.   1
   3   3   8  74388.  17773.   1
   3  -3  -8  62337.  15061.   1
  -3   3  -8  88109.  20922.   1
  -3   3  -8  73679.  17592.   1
   3  -3   9  43540.  10482.   1
   3  -3   9  82552.  19719.   1
  -3  -3  -9  46718.  11333.   1
   3   3   9  40201. 9853.64   1
   3  -3  -9  41322.  10206.   1
  -3   3  -9  30711. 7582.89   1
  -3   3  -9  69769.  16709.   1
   3  -3  10  27144. 6718.49   1
   3  -3  10  27510. 6997.48   1
  -3  -3 -10  31580. 7818.42   1
   3   3  10  34667. 8602.78   1
  -3   3 -10  16092. 4303.68   1
  -3   3 -10  50652.  12250.   1
   3  -3  11  21736. 5472.21   1
   3  -3  11  23576. 6089.63   1
   3   3  11  41962.  10245.   1
  -3   3 -11  21896. 5620.85   1
  -3   3 -11  43243.  10528.   1
   3  -3  12  10279. 2929.34   1
   3  -3  12  21486. 5678.02   1
  -3  -3 -12 9522.06 3029.95   1
   3   3  12  18056. 4790.76   1
  -3   3 -12  12735. 3558.19   1
  -3   3 -12  16026. 4427.16   1
   3  -3  13  16828. 4358.56   1
   3  -3  13  39058. 9647.83   1
  -3  -3 -13  28562. 7237.59   1
   3   3  13  32380. 8065.39   1
  -3   3 -13  22936. 5835.81   1
  -3   3 -13  26618. 6773.38   1
   3  -3  14  15971. 4454.60   1
  -3  -3 -14  10327. 3263.20   1
   3   3  14 8993.82 3158.01   1
  -3   3 -14  10711. 3352.39   1
   3  -3  15  13432. 4047.56  -1
  -3  -3 -15 1100.62 1974.39  -1
   3   3  15 2305.05 2289.04  -1
   3  -3  16  29248. 7537.15   1
  -3  -3 -16  53899.  13126.   1
   3   3  16  52161.  12815.   1
  -3   3 -16  55957.  13567.   1
   3  -3  17  28447. 7377.08   1
  -3  -3 -17  17894. 5369.31   1
   3   3  17  23096. 6501.25   1
  -3   3 -17  29065. 7475.41   1
   3  -3  18  15943. 4827.35   1
  -3  -3 -18  13217. 4539.21   1
   3   3  18 5696.31 3235.76   1
  -3   3 -18 7194.14 3208.32   1
   3  -3  19 5323.57 3210.61   1
  -3  -3 -19 4392.86 3471.30   1
   3   3  19 1813.40 3112.28   1
  -3   3 -19 8047.10 3359.25   1
   3  -3  20  36863. 9533.49  -1
  -3  -3 -20  45369.  11477.  -1
   3   3  20  29179. 7980.78  -1
  -3   3 -20  37183. 9608.96  -1
   3  -3  21  31603. 8289.50   1
  -3  -3 -21  31512. 8595.92   1
   3   3  21  27144. 7486.84   1
  -3   3 -21  36314. 9432.88   1
   3  -3  22  31031. 8369.53   1
  -3  -3 -22  28402. 7873.31   1
   3   3  22  39309.  10247.   1
  -3   3 -22  34027. 8893.20   1
   3  -3  23  22099. 6316.02   1
  -3  -3 -23  14230. 4985.13   1
   3   3  23  15765. 5319.00   1
  -3   3 -23  15671. 5172.65   1
   3  -3  24  10677. 4333.41   1
  -3  -3 -24 3368.39 3825.75   1
   3   3  24 7354.21 3894.35   1
  -3   3 -24 3976.67 3217.47   1
   3  -3  25 4829.63 3784.58   1
  -3  -3 -25 3361.53 3974.38   1
   3   3  25 3450.72 3395.83   1
  -3   3 -25 2888.17 3171.73   1
   3  -3  26 5531.67 3647.38   1
  -3  -3 -26 7226.15 4260.23   1
   3   3  26 4033.84 3681.68   1
  -3   3 -26 5383.03 3720.55   1
   3  -3  27 4514.06 3256.34   1
  -3  -3 -27 3254.06 3663.39   1
   3   3  27 7578.31 4042.99   1
  -3   3 -27 8865.76 4141.32   1
   3  -3  28  12232. 4337.98   1
  -3  -3 -28 8543.33 4049.85   1
   3   3  28 5142.92 3615.36   1
  -3   3 -28 8625.65 4022.41   1
   3  -3  29 3555.91 2991.08   1
  -3  -3 -29 4989.70 3370.68   1
   3   3  29 3919.50 3265.49   1
  -3   3 -29 4143.60 3144.29   1
   3  -3  30 3896.63 2954.49   1
  -3  -3 -30 3217.47 3109.99   1
   3   3  30 2549.73 3025.38   1
  -3   3 -30 2449.12 2865.31   1
   3  -3  31 1101.07 2684.65   1
  -3  -3 -31  467.41 2977.36   1
   3   3  31  -49.37 2803.56   1
  -3   3 -31 2874.45 2956.78   1
   3  -3  32  736.34 2741.82   1
  -3  -3 -32  851.59 3103.13   1
   3   3  32 1426.02 2805.85   1
  -3   3 -32  458.95 2901.90   1
   3   5   0  30734. 7681.22   1
  -3  -5   0  28173. 7068.37   1
   3  -5   0  23371. 5687.17   1
   3  -5   0  13451. 4013.26   1
  -3   5   0  17533. 4337.98   1
   3  -5   1 142511.  33570.   1
   3  -5   1 137983.  32678.   1
  -3   5   1 139515.  32861.   1
  -3   5   1 144089.  34096.   1
   3   5  -1 138898.  32815.   1
  -3  -5  -1 123691.  29248.   1
   3   5   1 141733.  33455.   1
  -3  -5   1 161285.  38075.   1
   3  -5  -1 151978.  35788.   1
   3  -5  -1 144706.  34256.   1
  -3   5  -1 144935.  34141.   1
  -3   5  -1 143906.  34050.   1
   3  -5   2  85479.  20204.   1
   3  -5   2  76058.  18216.   1
  -3   5   2  90990.  21502.   1
  -3   5   2  81317.  19437.   1
   3   5  -2  71667.  17132.   1
  -3  -5  -2  55248.  13243.   1
   3   5   2  86348.  20510.   1
  -3  -5   2 106563.  25269.   1
   3  -5  -2  69860.  16549.   1
   3  -5  -2  91973.  21957.   1
  -3   5  -2  90487.  21386.   1
  -3   5  -2  85731.  20448.   1
   3  -5   3 130460.  30734.   1
   3  -5   3 123714.  29316.   1
  -3   5   3 144066.  33958.   1
  -3   5   3  86714.  20695.   1
   3   5  -3 133958.  31763.   1
   3   5  -3 108004.  25612.   1
  -3  -5  -3 118317.  27967.   1
   3   5   3 111182.  26298.   1
  -3  -5   3 119529.  28310.   1
   3  -5  -3 125863.  29682.   1
   3  -5  -3 103041.  24514.   1
  -3   5  -3 155660.  36657.   1
  -3   5  -3 118065.  27967.   1
   3  -5   4 158404.  37297.   1
   3  -5   4 134278.  31786.   1
  -3   5   4 124308.  29362.   1
  -3   5   4 112806.  26778.   1
   3   5  -4 115618.  27395.   1
  -3  -5  -4 114932.  27190.   1
   3   5   4 115893.  27418.   1
  -3  -5   4 113423.  26892.   1
   3  -5  -4 129613.  30597.   1
   3  -5  -4  91356.  21800.   1
  -3   5  -4 132815.  31306.   1
  -3   5  -4 131214.  31031.   1
   3  -5   5 312828.  73519.   1
   3  -5   5 334553.  78642.   1
  -3   5   5 356963.  83924.   1
   3   5  -5 291790.  68603.   1
  -3  -5  -5 264578.  62177.   1
   3   5   5 276926.  65127.   1
  -3  -5   5 281729.  66247.   1
   3  -5  -5 284473.  66956.   1
   3  -5  -5 327921.  77087.   1
  -3   5  -5 291333.  68488.   1
  -3   5  -5 335696.  78893.   1
   3  -5   6  21509. 5305.28  -1
   3  -5   6  16682. 4591.81  -1
  -3   5   6  21804. 5479.07  -1
  -3  -5  -6  17807. 4667.27  -1
   3   5   6  15834. 4349.41  -1
   3  -5  -6  36039. 8776.58  -1
  -3   5  -6  16890. 4283.10  -1
  -3   5  -6  26778. 6745.93  -1
   3  -5   7  54997.  13115.   1
   3  -5   7  62543.  15024.   1
  -3   5   7  56849.  13702.   1
  -3  -5  -7  50034.  12099.   1
   3   5   7  71873.  17187.   1
  -3   5  -7  89321.  21157.   1
  -3   5  -7  71118.  16975.   1
   3  -5   8  14894. 3864.62   1
  -3   5   8 1883.14 1830.55   1
  -3  -5  -8 2812.71 2003.89   1
   3   5   8 6752.79 2403.38   1
   3  -5  -8 3985.82 2556.59   1
   3  -5   9 136474.  32243.   1
   3  -5   9 130734.  30940.   1
  -3   5   9 121221.  28790.   1
  -3  -5  -9 107180.  25406.   1
   3   5   9 114841.  27190.   1
   3  -5  -9 134233.  31946.   1
  -3   5  -9 138783.  32815.   1
  -3   5  -9 108415.  25703.   1
   3  -5  10 9165.32 2718.95   1
   3  -5  10 8641.66 2949.92   1
  -3   5  10 9773.60 3126.00   1
   3   5  10 7900.75 2689.23   1
   3  -5 -10 7592.03 3354.67   1
  -3   5 -10  15248. 4189.34   1
  -3   5 -10  13311. 3793.73   1
   3  -5  11  89138.  21189.   1
   3  -5  11  69037.  16538.   1
  -3  -5 -11  84793.  20158.   1
   3   5  11  82643.  19687.   1
   3  -5 -11  43997.  11079.   1
  -3   5 -11 100046.  23782.   1
  -3   5 -11  53967.  13021.   1
   3  -5  12  19941. 5335.01   1
  -3  -5 -12  18893. 4985.13   1
   3   5  12  19572. 5179.51   1
  -3   5 -12 9069.28 2979.65   1
   3  -5  13  20700. 5243.54   1
   3  -5  13  25452. 6617.88   1
  -3  -5 -13  43128.  10549.   1
   3   5  13  19037. 5124.62   1
  -3   5 -13  25406. 6441.80   1
  -3   5 -13  23416. 6110.22   1
   3  -5  14  13798. 3690.83   1
   3  -5  14  10860. 3512.46   1
  -3  -5 -14  10359. 3386.69   1
   3   5  14  16968. 4749.60   1
  -3   5 -14  13675. 3850.90   1
  -3   5 -14 6428.08 2682.37   1
   3  -5  15  22522. 5682.59   1
   3  -5  15  22858. 6009.60   1
  -3  -5 -15  39881. 9910.81   1
   3   5  15  39286. 9798.76   1
  -3   5 -15  32884. 8225.47   1
  -3   5 -15  43105.  10604.   1
   3  -5  16 8634.80 2691.51   1
   3  -5  16 9538.07 3354.67   1
  -3  -5 -16 6030.18 2979.65   1
   3   5  16 6585.86 3267.78   1
  -3   5 -16 8788.01 3071.12   1
  -3   5 -16 8431.28 3164.87   1
   3  -5  17 7034.07 2311.91   1
   3  -5  17 6485.24 2965.92   1
  -3  -5 -17  11457. 4205.35   1
   3   5  17  26686. 7278.75   1
  -3   5 -17  10540. 3391.26   1
  -3   5 -17  16542. 4781.61   1
   3  -5  18  11601. 3914.93   1
  -3  -5 -18  16638. 5149.78   1
   3   5  18 8346.67 3837.18   1
  -3   5 -18 7829.86 2709.81   1
  -3   5 -18 7701.80 3132.86   1
   3  -5  19  18239. 5328.15   1
  -3  -5 -19  24583. 6942.60   1
   3   5  19  15090. 4898.23   1
  -3   5 -19  15991. 4653.55   1
   3  -5  20  25612. 6960.89   1
  -3  -5 -20  28493. 7811.56   1
   3   5  20  23805. 6782.52   1
  -3   5 -20  23508. 6476.10   1
   3  -5  21  18193. 5511.09   1
  -3  -5 -21  36154. 9540.35   1
   3   5  21  25520. 7132.40   1
  -3   5 -21  23211. 6608.73   1
   3  -5  22 5618.56 3359.25   1
  -3  -5 -22 5865.53 3494.17   1
   3   5  22 1644.41 3352.39   1
  -3   5 -22 1599.59 2837.87   1
   3  -5  23  -29.43 2927.05  -1
  -3  -5 -23 1924.76 3519.32  -1
   3   5  23 7091.23 3752.57  -1
  -3   5 -23 2346.21 3231.19  -1
   3  -5  24 3937.80 3320.37   1
  -3  -5 -24 2506.29 3834.89   1
   3   5  24 2261.37 3288.36   1
  -3   5 -24 3549.05 3466.72   1
   3  -5  25  20745. 6405.21  -1
  -3  -5 -25  19648. 6341.18  -1
   3   5  25  18356. 5991.30  -1
  -3   5 -25  19881. 6016.46  -1
   3  -5  26 5088.04 3649.67   1
  -3  -5 -26  190.33 3354.67   1
   3   5  26 1819.57 3521.61   1
  -3   5 -26 2686.94 3167.16   1
   3  -5  27  30643. 8227.75   1
  -3  -5 -27  20780. 6281.72   1
   3   5  27  21466. 6496.68   1
  -3   5 -27  27395. 7576.03   1
   3  -5  28 5597.98 3265.49   1
  -3  -5 -28  620.63 2970.50   1
   3   5  28 1853.87 3244.91   1
  -3   5 -28 4065.85 3331.81   1
   3  -5  29 6002.74 3171.73   1
  -3  -5 -29 5641.43 3286.07   1
   3   5  29 4310.54 3187.74   1
  -3   5 -29 3430.14 2995.65   1
   3  -5  30 5481.36 3130.57   1
  -3  -5 -30 3322.66 3132.86   1
   3   5  30 5078.89 3233.47   1
  -3   5 -30 2590.90 2931.62   1
   3  -5  31    9.00 2700.66   1
  -3  -5 -31 -1072.9 2995.65   1
   3   5  31  751.89 2869.88   1
  -3   5 -31  337.07 2890.46   1
   3  -5  32 -1088.3 2826.43   1
  -3  -5 -32   -3.40 3146.58   1
   3   5  32  113.06 2789.84   1
  -3   5 -32 1184.08 3016.23   1
   3   7   0 163114.  38463.   1
   3   7   0 107043.  25360.   1
  -3  -7   0 145026.  34164.   1
  -3  -7   0  92065.  21882.   1
   3  -7   0 127029.  29979.   1
   3  -7   0  95586.  22813.   1
  -3   7   0 145003.  34210.   1
  -3   7   0 131694.  31214.   1
   3  -7   1 215024.  50606.   1
  -3   7   1 125383.  29614.   1
  -3   7   1  70135.  16883.   1
   3   7  -1 110633.  26092.   1
  -3  -7  -1  75463.  17857.   1
  -3  -7  -1  92065.  21845.   1
   3   7   1  94146.  22319.   1
  -3  -7   1 124194.  29248.   1
  -3  -7   1 126549.  29934.   1
   3  -7  -1 101326.  23965.   1
   3  -7  -1  94809.  22641.   1
  -3   7  -1 164898.  38875.   1
  -3   7  -1 118134.  28036.   1
   3  -7   2 9332.26 2552.02   1
   3  -7   2  27898. 7150.69   1
  -3   7   2  32998. 8344.38   1
   3   7  -2  64784.  15523.   1
   3   7  -2  19323. 4621.54   1
   3  -7  -2 7987.64 2346.21   1
   3  -7  -2  27121. 7061.51   1
  -3   7  -2  12099. 3178.59   1
  -3   7  -2  20871. 5561.39   1
   3  -7   3  40133. 9627.25   1
   3  -7   3  26961. 6878.57   1
  -3   7   3  15276. 3969.81   1
  -3   7   3  18356. 5106.33   1
   3   7  -3  12772. 3670.25   1
   3   7  -3  22936. 5449.34   1
  -3  -7  -3  28379. 7034.07   1
   3   7   3  22266. 5641.43   1
  -3  -7   3  18802. 4482.04   1
  -3  -7   3  20197. 5330.43   1
   3  -7  -3  18649. 4692.43   1
   3  -7  -3  18733. 5234.39   1
  -3   7  -3  34439. 8316.94   1
  -3   7  -3  12278. 3651.95   1
   3  -7   4 4902.81 1648.29  -1
   3  -7   4  17432. 4758.74  -1
  -3   7   4  17379. 4905.09  -1
   3   7  -4 9972.55 2435.40  -1
   3   7  -4  38943. 9544.93  -1
   3   7   4  17850. 4632.97  -1
  -3  -7   4  36428. 8961.80  -1
   3  -7  -4  13359. 3645.09  -1
  -3   7  -4 7969.35 2251.77  -1
  -3   7  -4  19115. 5056.02  -1
   3  -7   5  23554. 5796.93   1
  -3   7   5  18859. 4825.06   1
   3   7  -5  22772. 5472.21   1
   3   7   5  78664.  18715.   1
  -3  -7   5  42031. 9993.13   1
   3  -7  -5  22735. 5748.91   1
   3  -7  -5  80357.  19227.   1
  -3   7  -5  16554. 4216.78   1
  -3   7  -5  79602.  18964.   1
   3  -7   6  42008.  10085.   1
   3  -7   6  17091. 4628.40   1
  -3   7   6  21178. 5380.74   1
   3   7  -6  47382.  11523.   1
   3   7  -6  33181. 7914.47   1
  -3  -7  -6  16016. 4260.23   1
   3   7   6  20034. 5174.93   1
  -3  -7   6  22003. 5355.59   1
   3  -7  -6  17359. 4511.77   1
  -3   7  -6  30894. 7557.73   1
  -3   7  -6  21013. 5408.18   1
   3  -7   7 115115.  27190.  -1
   3  -7   7 127738.  30231.  -1
  -3   7   7 123554.  29293.  -1
   3   7  -7  78024.  18422.  -1
  -3  -7  -7 130071.  30734.  -1
   3   7   7 110839.  26229.  -1
   3  -7  -7 113103.  26847.  -1
  -3   7  -7 146924.  34690.  -1
  -3   7  -7 273496.  64326.  -1
   3  -7   8 5088.04 1784.59  -1
   3  -7   8  17473. 4733.59  -1
  -3   7   8  20444. 5504.23  -1
  -3   7  -8 7271.89 2272.81  -1
  -3   7  -8  13323. 3812.02  -1
   3  -7   9 9903.95 2766.98  -1
   3  -7   9 4674.13 2295.90  -1
  -3   7   9 5511.09 2584.04  -1
  -3  -7  -9  10400. 3091.70  -1
   3   7   9 2865.31 1830.78  -1
   3  -7  -9 5936.42 3265.49  -1
  -3   7  -9 5254.97 1911.73  -1
  -3   7  -9 1923.85 1825.29  -1
   3  -7  10  12200. 3299.79  -1
   3  -7  10  26664. 6857.99  -1
  -3   7  10 9721.01 3501.03  -1
   3  -7 -10  21518. 6217.69  -1
  -3   7 -10  20169. 5154.35  -1
  -3   7 -10  26824. 6851.13  -1
   3  -7  11  18358. 4703.86   1
   3  -7  11  10611. 3400.41   1
  -3   7  11  10064. 3587.92   1
  -3  -7 -11  14066. 3928.65   1
   3   7  11 9316.25 3020.81   1
   3  -7 -11  19024. 5609.42   1
  -3   7 -11  14697. 3974.38   1
  -3   7 -11  22170. 5764.92   1
   3  -7  12  26115. 6510.40   1
   3  -7  12  27258. 6912.87   1
  -3   7  12  12566. 4143.60   1
  -3  -7 -12  19024. 5060.59   1
   3   7  12  19616. 5243.54   1
   3  -7 -12  17240. 5323.57   1
  -3   7 -12  18477. 4923.39   1
  -3   7 -12  26504. 6716.21   1
   3  -7  13  64738.  15486.   1
   3  -7  13  43197.  10633.   1
  -3  -7 -13  34713. 8593.63   1
   3   7  13  67414.  16186.   1
   3  -7 -13  28447. 7861.87   1
  -3   7 -13  68168.  16373.   1
  -3   7 -13  67848.  16273.   1
   3  -7  14 4959.98 1958.84   1
   3  -7  14  12586. 3935.51   1
  -3  -7 -14 3446.14 2483.42   1
   3   7  14 8852.04 3199.17   1
  -3   7 -14 7475.41 2815.00   1
  -3   7 -14 7681.22 2890.46   1
   3  -7  15  33753. 8342.09   1
   3  -7  15  40476.  10080.   1
  -3  -7 -15  43357.  10800.   1
   3   7  15  45689.  11342.   1
  -3   7 -15  29819. 7630.91   1
  -3   7 -15  51452.  12545.   1
   3  -7  16  10869. 3231.19   1
   3  -7  16  15410. 4568.94   1
  -3  -7 -16  26138. 7127.82   1
   3   7  16 4806.76 3100.84   1
  -3   7 -16  18831. 5154.35   1
  -3   7 -16  15696. 4543.79   1
   3  -7  17  15532. 4214.49   1
   3  -7  17  25566. 6766.52   1
  -3  -7 -17  17347. 5202.37   1
   3   7  17  14889. 4747.31   1
  -3   7 -17 5961.58 2570.32   1
  -3   7 -17  16042. 4616.96   1
   3  -7  18  11093. 3265.49   1
   3  -7  18  15529. 4692.43   1
  -3  -7 -18  16817. 5369.31   1
   3   7  18  18161. 5440.20   1
  -3   7 -18  15477. 4397.43   1
  -3   7 -18  11425. 3665.67   1
   3  -7  19  28493. 7189.57   1
   3  -7  19  35971. 9183.62   1
  -3  -7 -19  29019. 7770.40   1
   3   7  19  29362. 7932.76   1
  -3   7 -19  23394. 6155.95   1
  -3   7 -19  30277. 7880.17   1
   3  -7  20  29636. 7459.40   1
   3  -7  20  34919. 9169.90   1
  -3  -7 -20  40681.  10569.   1
   3   7  20  47633.  11946.   1
  -3   7 -20  30597. 7740.67   1
  -3   7 -20  40910.  10370.   1
   3  -7  21  25131. 6439.51   1
   3  -7  21  36840. 9508.34   1
  -3  -7 -21  28584. 8053.96   1
   3   7  21  28790. 7946.48   1
  -3   7 -21  21301. 5694.03   1
  -3   7 -21  33295. 8611.93   1
   3  -7  22  32243. 8435.85   1
  -3  -7 -22  24628. 7182.71   1
   3   7  22  38829.  10055.   1
  -3   7 -22  17759. 4902.81   1
  -3   7 -22  31603. 8342.09   1
   3  -7  23  24697. 6999.76   1
  -3  -7 -23  23759. 7107.24   1
   3   7  23  15765. 5300.70   1
  -3   7 -23  21633. 6185.68   1
   3  -7  24  12895. 4632.97   1
  -3  -7 -24 3281.50 3862.33   1
   3   7  24 5540.81 4056.71   1
  -3   7 -24 5870.11 3812.02   1
   3  -7  25  47976.  12172.   1
  -3  -7 -25  35833. 9510.62   1
   3   7  25  39835.  10476.   1
  -3   7 -25  43906.  11187.   1
   3  -7  26 8472.44 4052.13   1
  -3  -7 -26 9284.24 4546.07   1
   3   7  26 5950.14 3834.89   1
  -3   7 -26 6864.85 3526.18   1
   3  -7  27 4637.54 3244.91   1
  -3  -7 -27 3393.55 3638.23   1
   3   7  27 4024.69 3423.28   1
  -3   7 -27 3320.37 3142.00   1
   3  -7  28 7120.96 3235.76   1
  -3  -7 -28 6268.00 3329.52   1
   3   7  28 2104.27 3025.38   1
  -3   7 -28 7008.91 3409.56   1
   3  -7  29 4223.64 2837.87   1
  -3  -7 -29 4664.99 3004.80   1
   3   7  29 6062.19 3363.82   1
  -3   7 -29 6226.84 3313.51   1
   3  -7  30 -525.27 2654.93   1
  -3  -7 -30 1696.09 2906.47   1
   3   7  30  283.79 2812.71   1
  -3   7 -30  966.61 2805.85   1
   3  -7  31 3443.86 3016.23   1
  -3  -7 -31 -886.58 3041.39   1
   3   7  31  685.80 2936.20   1
  -3   7 -31 2249.48 3009.37   1
   3   9   0  65653.  15575.   1
   3   9   0  39195. 9544.93   1
  -3  -9   0  62840.  14882.   1
  -3  -9   0  50240.  12136.   1
   3  -9   0  60713.  14740.   1
   3  -9   0  66568.  15866.   1
  -3   9   0  61765.  14745.   1
  -3   9   0  54859.  13391.   1
   3  -9   1  16401. 4180.19   1
   3  -9   1  18328. 5184.08   1
  -3   9   1  16218. 4182.48   1
  -3   9   1  10894. 3683.97   1
   3   9  -1  45163.  10750.   1
  -3  -9  -1  26298. 6425.79   1
  -3  -9  -1  32906. 8072.25   1
   3   9   1  24285. 6137.66   1
  -3  -9   1  25520. 6508.11   1
  -3  -9   1  21496. 5195.51   1
   3  -9  -1  23759. 5904.41   1
   3  -9  -1  21864. 5924.99   1
  -3   9  -1  25406. 6295.44   1
  -3   9  -1  21047. 5735.19   1
   3  -9   2  25795. 6359.47  -1
   3  -9   2  28379. 7319.91  -1
  -3   9   2  27464. 6764.23  -1
  -3   9   2  22271. 5975.30  -1
   3   9  -2  32243. 7681.22  -1
   3   9  -2  36062. 8925.21  -1
  -3  -9  -2  42214.  10192.  -1
  -3  -9  -2  31992. 7820.71  -1
   3   9   2  25817. 6562.99  -1
   3   9   2  17972. 4674.13  -1
  -3  -9   2  39607. 9700.43  -1
  -3  -9   2  38898. 9236.21  -1
   3  -9  -2  31786. 7765.83  -1
   3  -9  -2  31900. 8127.14  -1
  -3   9  -2  36542. 8879.48  -1
  -3   9  -2  25520. 6665.90  -1
   3  -9   3  64761.  15422.   1
   3  -9   3  77887.  18660.   1
  -3   9   3  59616.  14285.   1
  -3   9   3  60736.  14708.   1
   3   9  -3  73839.  17418.   1
   3   9  -3  62794.  15106.   1
  -3  -9  -3  45506.  10970.   1
  -3  -9  -3  61857.  14777.   1
   3   9   3  68854.  16401.   1
  -3  -9   3  71507.  16872.   1
  -3  -9   3  71187.  17032.   1
   3  -9  -3  57695.  13801.   1
   3  -9  -3  46879.  11537.   1
  -3   9  -3  79625.  18930.   1
  -3   9  -3  50949.  12378.   1
   3  -9   4  26778. 6560.71   1
   3  -9   4  51566.  12527.   1
  -3   9   4  74708.  17853.   1
   3   9  -4  23668. 5657.44   1
   3   9  -4  29842. 7498.28   1
  -3  -9  -4  28722. 7079.80   1
  -3  -9   4  26869. 6414.35   1
  -3  -9   4  58244.  14029.   1
   3  -9  -4  34690. 8502.16   1
   3  -9  -4  38212. 9576.94   1
  -3   9  -4  26549. 6574.43   1
  -3   9  -4  37320. 9206.49   1
   3  -9   5  39401. 9503.76   1
   3  -9   5  57672.  13931.   1
  -3   9   5  39538. 9684.42   1
   3   9  -5  64395.  15198.   1
   3   9  -5  31054. 7758.97   1
  -3  -9  -5  53281.  12776.   1
   3   9   5  38349. 9352.84   1
  -3  -9   5  50149.  11871.   1
  -3  -9   5  29431. 7372.51   1
   3  -9  -5  44546.  10848.   1
  -3   9  -5  48662.  11708.   1
  -3   9  -5  31146. 7758.97   1
   3  -9   6  22634. 5630.00   1
   3  -9   6  19273. 5170.36   1
  -3   9   6  36222. 8906.92   1
   3   9  -6  17308. 4189.34   1
   3   9  -6  21669. 5636.86   1
  -3  -9   6  33455. 7976.21   1
   3  -9  -6  31717. 7907.61   1
  -3   9  -6  20021. 5106.33   1
  -3   9  -6  17745. 4697.00   1
   3  -9   7  47633.  11418.   1
   3  -9   7  27144. 6892.29   1
  -3   9   7  27555. 6954.03   1
   3   9  -7  30963. 7393.09   1
  -3  -9  -7  29133. 7230.73   1
  -3  -9   7  41002. 9787.32   1
   3  -9  -7  28196. 7070.65   1
  -3   9  -7  52367.  12593.   1
  -3   9  -7  30871. 7704.09   1
   3  -9   8  32426. 7880.17   1
   3  -9   8  28127. 7178.13   1
  -3   9   8  37937. 9384.85   1
   3   9  -8  31077. 7457.12   1
  -3  -9  -8  32426. 7996.79   1
   3   9   8  23051. 5860.96   1
  -3  -9   8  24971. 6114.79   1
   3  -9  -8  23942. 6229.13   1
  -3   9  -8  21345. 5433.34   1
  -3   9  -8  31626. 7900.75   1
   3  -9   9 9618.10 2714.38   1
   3  -9   9  11104. 3503.31   1
  -3   9   9 6622.45 2824.15   1
   3   9  -9  16627. 4134.46   1
  -3  -9  -9  14843. 4040.70   1
   3   9   9  15776. 4223.64   1
  -3  -9   9 8531.89 2433.11   1
   3  -9  -9  29293. 7690.37   1
  -3   9  -9  10455. 2997.94   1
  -3   9  -9  20329. 5417.33   1
   3  -9  10  28310. 6949.46   1
   3  -9  10  21468. 5780.92   1
  -3   9  10  35925. 9188.19   1
   3   9 -10  23782. 5794.64   1
  -3  -9 -10  22015. 5627.71   1
   3   9  10  15703. 4269.38   1
  -3  -9  10  18440. 4623.82   1
   3  -9 -10  23691. 6734.50   1
  -3   9 -10  38532. 9391.71   1
  -3   9 -10  18598. 5035.44   1
   3  -9  11 5812.94 1927.51   1
   3  -9  11 2959.06 2201.92   1
  -3   9  11 5984.44 3020.81   1
   3   9 -11 2739.54 1281.96   1
  -3  -9  11 6261.14 1908.99   1
   3  -9 -11 7123.25 3917.22   1
  -3   9 -11 7706.37 2504.00   1
  -3   9 -11 3656.53 2403.38   1
   3  -9  12 3830.32 1706.84   1
   3  -9  12 3050.53 2263.43   1
  -3   9  12  638.23 2652.64   1
   3   9 -12 1018.29 1092.84   1
  -3  -9 -12  10075. 3142.00   1
   3   9  12 1251.08 1986.28   1
   3  -9 -12 4466.04 3972.10   1
  -3   9 -12 8422.13 2636.63   1
  -3   9 -12 2101.30 2116.62   1
   3  -9  13  37228. 9101.29  -1
   3  -9  13  32220. 8108.84  -1
  -3   9  13  32609. 8822.31  -1
  -3  -9 -13  20123. 5403.61  -1
   3   9  13  32838. 8268.92  -1
   3  -9 -13  31146. 8774.29  -1
  -3   9 -13  28607. 7162.12  -1
  -3   9 -13  31855. 8026.52  -1
   3  -9  14  19042. 4978.27   1
   3  -9  14  13572. 4120.74   1
  -3   9  14  17633. 5527.09   1
  -3  -9 -14 5499.65 2712.09   1
   3   9  14  16718. 4987.42   1
   3  -9 -14  13542. 5460.78   1
  -3   9 -14  31580. 7930.47   1
  -3   9 -14  21388. 5780.92   1
   3  -9  15 4795.33 2076.38   1
   3  -9  15 2116.85 2282.18   1
  -3  -9 -15 1764.69 2577.18   1
   3   9  15 4196.20 2641.20   1
   3  -9 -15  13906. 5225.24   1
  -3   9 -15  13265. 3956.09   1
  -3   9 -15 1838.55 1963.64   1
   3  -9  16  17475. 4676.42   1
   3  -9  16  18360. 5165.79   1
  -3  -9 -16  34850. 9009.82   1
   3   9  16  27327. 7340.49   1
  -3   9 -16  28813. 7331.34   1
  -3   9 -16  28241. 7187.28   1
   3  -9  17  35308. 8767.43   1
   3  -9  17  29591. 7694.94   1
  -3  -9 -17  47839.  11978.   1
   3   9  17  35308. 9119.59   1
  -3   9 -17  45118.  11093.   1
  -3   9 -17  24445. 6453.23   1
   3  -9  18 9366.56 3597.07  -1
  -3  -9 -18 4482.04 3196.89  -1
   3   9  18  14093. 4774.75  -1
  -3   9 -18 9288.81 3567.34  -1
   3  -9  19  16293. 4539.21   1
   3  -9  19  30643. 8081.40   1
  -3  -9 -19  13780. 4985.13   1
   3   9  19  12659. 4685.57   1
  -3   9 -19  20821. 5522.52   1
  -3   9 -19  19008. 5506.51   1
   3  -9  20  56140.  13663.   1
   3  -9  20  62360.  15253.   1
  -3  -9 -20  59479.  14688.   1
   3   9  20  63755.  15724.   1
  -3   9 -20  52321.  12785.   1
  -3   9 -20  47565.  11800.   1
   3  -9  21 102172.  24400.   1
   3  -9  21  92111.  22140.   1
  -3  -9 -21 119117.  28562.   1
   3   9  21  85731.  20750.   1
  -3   9 -21 120055.  28584.   1
  -3   9 -21 132358.  31466.   1
   3  -9  22  37206. 9291.10   1
   3  -9  22  51200.  12701.   1
  -3  -9 -22  33730. 9176.76   1
   3   9  22  31900. 8616.50   1
  -3   9 -22  28219. 7299.33   1
  -3   9 -22  23965. 6695.63   1
   3  -9  23  51246.  12520.   1
   3  -9  23  61834.  15273.   1
  -3  -9 -23  44089.  11418.   1
   3   9  23  49714.  12692.   1
  -3   9 -23  48937.  12060.   1
  -3   9 -23  87034.  20988.   1
   3  -9  24  19046. 5181.79   1
   3  -9  24  27304. 7459.40   1
  -3  -9 -24  30002. 8371.82   1
   3   9  24  15927. 5435.62   1
  -3   9 -24  16343. 4772.46   1
  -3   9 -24  23028. 6601.87   1
   3  -9  25 3494.17 2325.63   1
   3  -9  25  11464. 4402.01   1
  -3  -9 -25 4239.65 3233.47   1
   3   9  25 3841.75 3475.87   1
  -3   9 -25 2144.75 2661.79   1
  -3   9 -25 5110.90 3443.86   1
   3  -9  26 6972.32 3654.24   1
  -3  -9 -26 3878.34 3064.26   1
   3   9  26 2137.89 3137.43   1
  -3   9 -26 3043.67 2778.41   1
  -3   9 -26 4246.51 3004.80   1
   3  -9  27 -524.35 2634.34   1
  -3  -9 -27 -823.00 2556.59   1
   3   9  27 1479.76 2817.29   1
  -3   9 -27  192.25 2355.36   1
   3  -9  28 2485.71 2975.07   1
  -3  -9 -28 -489.59 2460.55   1
   3   9  28  264.12 2650.35   1
  -3   9 -28 1984.91 2696.09   1
   3  -9  29 1407.50 2481.13   1
  -3  -9 -29 2217.70 2718.95   1
   3   9  29  300.25 2746.40   1
  -3   9 -29  321.06 2677.79   1
   3  -9  30 3981.24 2970.50   1
  -3  -9 -30  547.91 2860.73   1
   3   9  30 1165.56 2975.07   1
  -3   9 -30  588.15 2863.02   1
   3  11   0 6832.83 2160.30   1
   3  11   0 6192.54 2391.95   1
  -3 -11   0 3750.28 1495.77   1
  -3 -11   0 5744.33 2332.49   1
   3 -11   0 4017.83 2526.87   1
   3 -11   0 4280.81 1769.95   1
  -3  11   0 4161.90 1700.89   1
  -3  11   0 4921.10 2682.37   1
   3 -11   1 7736.10 2373.65   1
  -3  11   1 3773.15 2634.34   1
  -3  11   1  11091. 3167.16   1
   3  11  -1 5973.01 2453.69   1
   3  11  -1 7495.99 2198.49   1
  -3 -11  -1 4946.26 1721.01   1
  -3 -11  -1  19641. 5076.60   1
   3  11   1 7148.40 2398.81   1
  -3 -11   1 7386.23 2059.45   1
   3 -11  -1 9926.81 2831.01   1
   3 -11  -1 6789.38 2997.94   1
  -3  11  -1 4493.48 1844.73   1
   3 -11   2  14891. 4395.15   1
  -3  11   2  13265. 3654.24   1
  -3  11   2  15705. 4639.83   1
   3  11  -2  16092. 3985.82   1
   3  11  -2  15772. 4356.27   1
  -3 -11  -2  15143. 3994.97   1
  -3 -11  -2 9012.11 2725.81   1
   3  11   2  35422. 8824.60   1
   3  11   2 8737.70 2670.93   1
  -3 -11   2  14596. 4049.85   1
  -3 -11   2  18303. 4493.48   1
   3 -11  -2  16917. 4959.98   1
   3 -11  -2  13666. 3670.25   1
  -3  11  -2  29385. 7301.62   1
  -3  11  -2  25040. 6574.43   1
   3 -11   3  62589.  14949.   1
   3 -11   3  51475.  12541.   1
  -3  11   3  66339.  15907.   1
  -3  11   3  58472.  14244.   1
   3  11  -3  60782.  14628.   1
   3  11  -3  74846.  17686.   1
  -3 -11  -3  63412.  15253.   1
  -3 -11  -3  66796.  15911.   1
   3  11   3  49531.  11928.   1
   3  11   3  51429.  12632.   1
  -3 -11   3  67002.  16060.   1
  -3 -11   3  53899.  12788.   1
   3 -11  -3  60691.  14555.   1
   3 -11  -3  50171.  12355.   1
  -3  11  -3  61537.  14752.   1
  -3  11  -3  46467.  11379.   1
   3 -11   4  51246.  12305.   1
   3 -11   4  28653. 7319.91   1
  -3  11   4  43380.  10627.   1
  -3  11   4  54974.  13435.   1
   3  11  -4  51109.  12115.   1
   3  11  -4  52275.  12625.   1
  -3 -11  -4  54608.  13252.   1
   3  11   4  36748. 9263.65   1
   3  11   4  51521.  12390.   1
  -3 -11   4  38555. 9185.91   1
  -3 -11   4  45735.  11123.   1
   3 -11  -4  97827.  23279.   1
   3 -11  -4  44432.  10986.   1
  -3  11  -4  33730. 8284.92   1
  -3  11  -4  41093.  10114.   1
   3 -11   5  96844.  22959.   1
   3 -11   5 108186.  25703.   1
  -3  11   5  84999.  20354.   1
   3  11  -5 104985.  24743.   1
   3  11  -5 100915.  23965.   1
  -3 -11  -5  72399.  17389.   1
  -3 -11  -5 112463.  26618.   1
   3  11   5  99588.  23599.   1
  -3 -11   5 109764.  25863.   1
  -3 -11   5  65676.  15760.   1
   3 -11  -5 123508.  29316.   1
  -3  11  -5 124148.  29408.   1
  -3  11  -5  97713.  23211.   1
   3 -11   6  16428. 4269.38   1
   3 -11   6  15278. 4294.53   1
  -3  11   6  14276. 4013.26   1
   3  11  -6  17345. 4241.94   1
  -3 -11  -6  12735. 3565.05   1
   3  11   6  12909. 3665.67   1
  -3 -11   6  25703. 6194.83   1
   3 -11  -6  18422. 5001.14   1
  -3  11  -6  10592. 3025.38   1
  -3  11  -6  15518. 4253.37   1
   3 -11   7  34553. 8401.55   1
   3 -11   7  33753. 8406.12   1
  -3  11   7  20819. 5463.06   1
   3  11  -7  36474. 8694.25   1
  -3 -11  -7  40430. 9826.20   1
   3  11   7  37914. 9233.93   1
  -3 -11   7  35102. 8385.54   1
   3 -11  -7  68420.  16469.   1
  -3  11  -7  30139. 7573.74   1
  -3  11   8  10512. 3238.05   1
  -3 -11  -8 3487.31 1901.67   1
   3  11   8 3729.70 2077.52   1
  -3 -11   8  10215. 2657.21   1
   3 -11  -8 2600.04 2106.56   1
  -3  11  -8 6329.74 2198.95   1
   3 -11   9  19790. 5316.71   1
  -3  11   9  11825. 3736.56   1
   3  11  -9  14585. 3658.81   1
  -3 -11  -9  15218. 4145.89   1
   3  11   9 9716.43 3142.00   1
  -3 -11   9  17898. 4552.93   1
   3 -11  -9  20444. 5634.57   1
  -3  11  -9  48319.  11653.   1
  -3  11  -9  11726. 3617.65   1
   3 -11  10  24285. 6032.47   1
   3 -11  10  23668. 6254.28   1
  -3  11  10  52938.  13204.   1
   3  11 -10  63663.  15129.   1
  -3 -11 -10  18468. 4957.69   1
   3  11  10  19694. 5179.51   1
  -3 -11  10  36359. 8838.32   1
   3 -11 -10  33958. 8890.91   1
  -3  11 -10  26641. 6647.60   1
  -3  11 -10  18004. 4964.55   1
   3 -11  11 5026.29 1869.42   1
   3 -11  11  16414. 4820.48   1
  -3  11  11  10281. 4360.85   1
   3  11 -11 6851.13 2194.37   1
  -3 -11 -11 7907.61 2750.97   1
   3  11  11 8810.88 3077.98   1
  -3 -11  11  13279. 3654.24   1
   3 -11 -11 4703.86 3613.08   1
  -3  11 -11 5252.68 2040.70   1
  -3  11 -11  13003. 3972.10   1
   3 -11  12  42831.  10359.   1
   3 -11  12  25657. 6665.90   1
  -3  11  12  36497. 9702.71   1
   3  11 -12  30208. 7413.67   1
  -3 -11 -12  34553. 8586.77   1
   3  11  12  22561. 5915.84   1
  -3 -11  12  24651. 6222.27   1
   3 -11 -12  24514. 7566.88   1
  -3  11 -12  26572. 6677.33   1
  -3  11 -12  25612. 6599.58   1
   3 -11  13  13478. 3661.10  -1
   3 -11  13  16968. 4690.14  -1
  -3  11  13  13320. 5056.02  -1
   3  11 -13  15760. 4155.04  -1
  -3 -11 -13  23874. 6217.69  -1
   3  11  13  13590. 4145.89  -1
  -3 -11  13  12790. 3576.49  -1
   3 -11 -13  16689. 6000.45  -1
  -3  11 -13  26366. 6643.03  -1
  -3  11 -13  11393. 3615.36  -1
   3 -11  14  23233. 5906.69   1
   3 -11  14  21301. 5618.56   1
  -3  11  14  28013. 7820.71   1
   3  11 -14  28081. 6954.03   1
  -3 -11 -14  32861. 8445.00   1
   3  11  14  32037. 8252.91   1
  -3 -11  14  18070. 4754.17   1
   3 -11 -14  25223. 7857.30   1
  -3  11 -14  37571. 9243.07   1
  -3  11 -14  18239. 5056.02   1
   3 -11  15  12184. 3514.75   1
   3 -11  15 1767.66 2274.64   1
  -3  11  15 1343.47 2945.34   1
   3  11 -15 4029.27 1845.64   1
  -3 -11 -15 4033.84 3119.14   1
   3  11  15 7395.37 3425.56   1
  -3 -11  15 3068.83 1685.34   1
   3 -11 -15 5588.83 4614.68   1
  -3  11 -15 2869.88 1867.37   1
  -3  11 -15 3382.11 2474.27   1
   3 -11  16  18749. 5017.15   1
   3 -11  16  12637. 4075.00   1
  -3  11  16  12863. 4786.18   1
   3  11 -16 7178.13 2394.24   1
  -3 -11 -16  15294. 5026.29   1
   3  11  16 8755.99 3848.61   1
   3 -11 -16 6384.63 4349.41   1
  -3  11 -16  18260. 4923.39   1
  -3  11 -16  18319. 5250.40   1
   3 -11  17  22051. 5806.08   1
   3 -11  17  15163. 4575.80   1
  -3 -11 -17  32358. 8614.22   1
   3  11  17  19309. 5801.50   1
   3 -11 -17  22044. 7123.25   1
  -3  11 -17  22408. 5858.67   1
  -3  11 -17  13439. 4390.57   1
   3 -11  18  14169. 4145.89   1
   3 -11  18  21555. 6082.77   1
  -3 -11 -18  24606. 6965.46   1
   3  11  18  28402. 7614.90   1
  -3  11 -18  23576. 6197.11   1
  -3  11 -18  13469. 4456.89   1
   3 -11  19  21804. 5824.37   1
   3 -11  19 6320.60 3105.42   1
  -3 -11 -19  10533. 4360.85   1
   3  11  19 7194.14 3768.58   1
  -3  11 -19  14649. 4292.24   1
  -3  11 -19  13153. 4273.95   1
   3 -11  20 5435.62 2977.36   1
  -3 -11 -20 4655.84 3706.83   1
   3  11  20  16849. 5442.48   1
  -3  11 -20 8117.99 3212.89   1
   3 -11  21  27395. 7047.79   1
   3 -11  21  44775.  11164.   1
  -3 -11 -21  26984. 7813.85   1
   3  11  21  33318. 9009.82   1
  -3  11 -21  38166. 9547.21   1
  -3  11 -21  37914. 9638.68   1
   3 -11  22 3043.67 2178.37   1
   3 -11  22  848.84 2750.97   1
  -3 -11 -22 1306.88 3482.73   1
   3  11  22 3235.76 3615.36   1
  -3  11 -22 4022.41 2542.87   1
  -3  11 -22 2382.80 2524.58   1
   3 -11  23 5755.77 2798.99  -1
   3 -11  23 4219.07 3171.73  -1
  -3 -11 -23 3254.06 3681.68  -1
   3  11  23 2863.02 3363.82  -1
  -3  11 -23 4004.11 2666.36  -1
  -3  11 -23 2485.71 3103.13  -1
   3 -11  24 2401.10 2423.96   1
   3 -11  24 3455.29 3018.52   1
  -3 -11 -24 -122.89 2954.49   1
   3  11  24 2366.79 2961.35   1
  -3  11 -24  741.14 2721.24   1
  -3  11 -24 3313.51 2972.78   1
   3 -11  25 6860.27 3041.39   1
   3 -11  25  10057. 3823.46   1
  -3 -11 -25 5927.28 3407.27   1
   3  11  25 5865.53 3592.50   1
  -3  11 -25  10181. 3857.76   1
  -3  11 -25 8019.66 3786.87   1
   3 -11  26 7784.12 3338.67   1
   3 -11  26 3180.88 2782.98   1
  -3 -11 -26 3642.80 2833.29   1
   3  11  26 3297.50 2718.95   1
  -3  11 -26 7788.70 3603.93   1
  -3  11 -26 5209.23 2975.07   1
   3 -11  27  603.93 2116.85   1
   3 -11  27 -206.27 2485.71   1
  -3 -11 -27 -551.11 2465.12   1
   3  11  27  279.90 3064.26   1
  -3  11 -27 1643.72 2675.51   1
  -3  11 -27    0.21 2714.38   1
   3 -11  28 5627.71 2879.03   1
   3 -11  28 3013.95 2970.50   1
  -3 -11 -28  987.42 2391.95   1
   3  11  28 1161.67 3155.73   1
  -3  11 -28 1445.92 2869.88   1
  -3  11 -28  613.08 2435.40   1
   3 -11  29 1509.03 1893.44   1
   3 -11  29 4429.45 2803.56   1
  -3 -11 -29 -245.37 2981.93   1
   3  11  29 -1313.5 2895.03   1
  -3  11 -29  906.24 2741.82   1
  -3  11 -29  767.21 2606.90   1
   3  13   0  13092. 3631.37  -1
   3  13   0  17061. 4582.66  -1
  -3 -13   0  17988. 4564.37  -1
  -3 -13   0  19604. 5024.01  -1
   3 -13   0 9549.50 2773.84  -1
   3 -13   0 9615.82 3329.52  -1
  -3  13   0  13055. 3585.64  -1
  -3  13   0 7299.33 2792.13  -1
   3 -13   1 8312.36 2508.57   1
   3 -13   1 2965.92 2186.37   1
  -3  13   1  12483. 3469.01   1
  -3  13   1 7228.44 2888.17   1
   3  13  -1  15008. 4180.19   1
   3  13  -1 4061.28 1613.31   1
  -3 -13  -1  12838. 3498.74   1
  -3 -13  -1 7468.55 2570.32   1
   3  13   1 6512.69 2455.98   1
   3  13   1 5421.90 2123.25   1
  -3 -13   1 5254.97 1672.31   1
  -3 -13   1  12330. 3558.19   1
   3 -13  -1 6492.10 2146.35   1
   3 -13  -1 5591.12 2641.20   1
  -3  13  -1 6979.18 2237.82   1
  -3  13  -1 4829.63 2414.82   1
   3 -13   2  14233. 3812.02   1
   3 -13   2  11951. 3802.88   1
  -3  13   2 6958.60 2346.21   1
  -3  13   2  14240. 4214.49   1
   3  13  -2  38669. 9480.90   1
   3  13  -2  12808. 3302.08   1
  -3 -13  -2  10997. 3265.49   1
   3  13   2  16074. 4390.57   1
   3  13   2  23737. 6053.05   1
  -3 -13   2 7836.72 2174.94   1
  -3 -13   2  14836. 4104.73   1
   3 -13  -2  11704. 3247.20   1
   3 -13  -2  15356. 4372.28   1
  -3  13  -2  10800. 3057.39   1
  -3  13  -2  16225. 4587.24   1
   3 -13   3  38120. 9259.08   1
   3 -13   3  43769.  10793.   1
   3  13  -3  62497.  14825.   1
   3  13  -3  50286.  12182.   1
  -3 -13  -3  32358. 8085.97   1
  -3 -13  -3  29659. 7349.64   1
   3  13   3  32243. 8392.40   1
   3  13   3  41253.  10027.   1
  -3 -13   3  50629.  12056.   1
   3 -13  -3  96638.  22959.   1
  -3  13  -3  34690. 8497.59   1
  -3  13  -3  48959.  11932.   1
   3 -13   4  19051. 4825.06   1
   3 -13   4  19035. 5142.92   1
  -3  13   4  34370. 8547.90   1
  -3  13   4  23919. 6279.44   1
   3  13  -4  12332. 3155.73   1
   3  13  -4  22721. 5902.12   1
  -3 -13  -4  27533. 6926.59   1
  -3 -13  -4  25452. 6793.96   1
   3  13   4  22335. 6679.62   1
   3  13   4  19351. 5108.62   1
  -3 -13   4  32243. 7987.64   1
  -3 -13   4  30162. 7260.46   1
   3 -13  -4  25406. 6396.06   1
   3 -13  -4  14939. 4397.43   1
  -3  13  -4  23165. 5831.23   1
  -3  13  -4  15445. 4374.57   1
   3 -13   5  70935.  16895.   1
   3 -13   5  59341.  14349.   1
  -3  13   5  50103.  12230.   1
   3  13  -5  75303.  17807.   1
   3  13  -5  70043.  16739.   1
  -3 -13  -5 102172.  24240.   1
  -3 -13  -5  69952.  17050.   1
   3  13   5  59479.  14887.   1
   3  13   5  80654.  19197.   1
  -3 -13   5  48845.  11617.   1
  -3 -13   5  47565.  11480.   1
   3 -13  -5  83993.  20091.   1
  -3  13  -5  57489.  13801.   1
  -3  13  -5  53556.  12952.   1
   3 -13   6  52321.  12538.   1
   3 -13   6  39492. 9748.45   1
  -3  13   6  66156.  16000.   1
   3  13  -6  49440.  11745.   1
   3  13  -6  45552.  11066.   1
  -3 -13  -6  71530.  17439.   1
  -3 -13  -6  42648.  10384.   1
   3  13   6  36771. 9773.60   1
   3  13   6  56048.  13487.   1
  -3 -13   6  48959.  11642.   1
   3 -13  -6  56231.  13654.   1
  -3  13  -6  41002. 9935.96   1
  -3  13  -6  50697.  12305.   1
   3 -13   7  11102. 3103.13   1
   3 -13   7 8211.75 2970.50   1
  -3  13   7  10149. 3231.19   1
   3  13  -7  21290. 5184.08   1
  -3 -13  -7 5995.88 2462.84   1
  -3 -13  -7  12918. 4386.00   1
   3  13   7 7633.20 2718.95   1
  -3 -13   7 5531.67 1684.20   1
   3 -13  -7 5364.73 2611.48   1
  -3  13  -7 7523.43 2355.36   1
  -3  13  -7 5485.93 2542.87   1
   3 -13   8 109376.  25909.   1
   3 -13   8 121473.  28836.   1
  -3  13   8 112280.  26778.   1
   3  13  -8  98331.  23211.   1
  -3 -13  -8  84176.  20037.   1
   3  13   8  89366.  21262.   1
  -3 -13   8 102035.  24080.   1
   3 -13  -8 104253.  24903.   1
  -3  13  -8 194580.  45872.   1
  -3  13  -8 106609.  25337.   1
   3 -13   9  54379.  13046.  -1
   3 -13   9  36908. 9215.63  -1
  -3  13   9  44112.  10965.  -1
   3  13  -9  93002.  21978.  -1
  -3 -13  -9  59684.  14352.  -1
   3  13   9  69540.  16634.  -1
  -3 -13   9  68031.  16135.  -1
   3 -13  -9  56026.  13695.  -1
  -3  13  -9  65996.  15765.  -1
  -3  13  -9  68100.  16355.  -1
   3 -13  10  10396. 2936.20   1
   3 -13  10 6112.50 2643.49   1
  -3  13  10 1350.33 2189.80   1
   3  13 -10 6480.67 1947.86   1
  -3 -13 -10 6967.75 2524.58   1
   3  13  10 6755.08 2533.73   1
  -3 -13  10 9874.22 2675.51   1
   3 -13 -10 3089.41 2737.25   1
  -3  13 -10 2755.54 1556.14   1
  -3  13 -10 5415.04 2670.93   1
   3 -13  11 1307.57 1365.19   1
   3 -13  11 4831.92 2670.93   1
  -3  13  11  15509. 5115.48   1
   3  13 -11 6636.17 2019.89   1
  -3 -13 -11 9108.15 3169.45   1
   3  13  11 3100.84 2219.30   1
  -3 -13  11 4719.87 1665.22   1
   3 -13 -11  12188. 4564.37   1
  -3  13 -11 1985.13 1558.20   1
  -3  13 -11 2771.55 2226.62   1
   3 -13  12  18209. 4751.88   1
   3 -13  12  20521. 5579.69   1
  -3  13  12  31420. 8543.33   1
  -3 -13 -12  20185. 5412.75   1
   3  13  12  28219. 7377.08   1
  -3 -13  12  31054. 7658.35   1
   3 -13 -12  20727. 6677.33   1
  -3  13 -12  43860.  10656.   1
  -3  13 -12  19600. 5479.07   1
   3 -13  13  12678. 3565.05   1
   3 -13  13  15170. 4520.92   1
  -3  13  13  25749. 7486.84   1
   3  13 -13  13684. 3695.40   1
  -3 -13 -13  26092. 6887.71   1
   3  13  13  29431. 7871.02   1
  -3 -13  13  32701. 8111.13   1
   3 -13 -13 8241.47 4639.83   1
  -3  13 -13 9677.56 2981.93   1
  -3  13 -13  10062. 3517.03   1
   3 -13  14  11294. 3379.83   1
   3 -13  14 1075.23 2611.48   1
  -3  13  14 2465.12 3592.50   1
   3  13 -14 4980.56 2052.59   1
  -3 -13 -14 6489.82 3320.37   1
   3  13  14 6492.10 3400.41   1
  -3 -13  14 5145.20 2343.93   1
   3 -13 -14 5421.90 4623.82   1
  -3  13 -14 6807.68 2437.68   1
  -3  13 -14 3663.39 2668.65   1
   3 -13  15  21973. 5691.74   1
   3 -13  15  23965. 6556.13   1
  -3  13  15  18802. 6153.66   1
   3  13 -15  35262. 8710.26   1
  -3 -13 -15  24400. 6860.27   1
   3  13  15  28859. 7818.42   1
  -3 -13  15  18939. 5115.48   1
   3 -13 -15  26252. 8488.44   1
  -3  13 -15  30368. 7573.74   1
  -3  13 -15  34278. 8790.30   1
   3 -13  16 3937.80 2023.32   1
   3 -13  16 3036.81 2426.25   1
  -3  13  16 4651.26 3988.10   1
   3  13 -16 2728.10 1897.32   1
  -3 -13 -16 5058.31 3416.42   1
   3  13  16 4033.84 3142.00   1
  -3 -13  16  11290. 3528.47   1
   3 -13 -16 2275.55 5104.04   1
  -3  13 -16 4861.65 2157.56   1
  -3  13 -16 8559.33 3571.92   1
   3 -13  17  28127. 7148.40   1
   3 -13  17  25040. 6764.23   1
  -3  13  17  20837. 6631.60   1
   3  13 -17  19179. 5117.76   1
  -3 -13 -17  25909. 7313.05   1
   3  13  17  19072. 5815.22   1
  -3 -13  17  22179. 5876.97   1
   3 -13 -17  12756. 6322.88   1
  -3  13 -17  26046. 6608.73   1
  -3  13 -17  36977. 9396.29   1
   3 -13  18  10338. 3432.42   1
   3 -13  18 5300.70 2739.54   1
  -3  13  18 1571.46 3517.03   1
   3  13 -18  11223. 3423.28   1
  -3 -13 -18 5666.58 3873.77   1
   3  13  18  11267. 4637.54   1
  -3 -13  18 9622.67 3254.06   1
   3 -13 -18 3402.70 4891.37   1
  -3  13 -18  13915. 3994.97   1
  -3  13 -18 8948.08 3439.28   1
   3 -13  19  20764. 5597.98   1
   3 -13  19  18289. 5296.13   1
   3  13 -19 9268.23 2993.37   1
  -3 -13 -19  18047. 6139.94   1
   3  13  19  22177. 6787.10   1
  -3 -13  19  13405. 3942.37   1
   3 -13 -19  15234. 6407.49   1
  -3  13 -19  23051. 6162.81   1
  -3  13 -19  18315. 5341.87   1
   3 -13  20 5202.37 2552.02   1
   3 -13  20 3990.39 2769.26   1
   3  13 -20  263.43 1756.23   1
  -3 -13 -20 3272.35 3814.31   1
   3  13  20 -248.11 3356.96   1
  -3  13 -20 7498.28 2963.64   1
  -3  13 -20 4450.03 2808.14   1
   3 -13  21  18013. 5076.60   1
   3 -13  21 9407.72 3850.90   1
  -3 -13 -21 8751.42 4260.23   1
   3  13  21 4985.13 3738.85   1
  -3  13 -21 9659.26 3551.33   1
  -3  13 -21  12220. 4241.94   1
   3 -13  22  30894. 8042.53   1
   3 -13  22  17448. 5282.41   1
  -3 -13 -22  12184. 4831.92   1
   3  13  22  13677. 4749.60   1
  -3  13 -22  32838. 8536.47   1
  -3  13 -22  17155. 5069.74   1
   3 -13  23  42854.  10780.   1
   3 -13  23  10535. 4010.97   1
  -3 -13 -23 8570.77 3944.66   1
   3  13  23 9723.29 3919.50   1
  -3  13 -23  21196. 6041.61   1
  -3  13 -23  20514. 5867.82   1
   3 -13  24  23005. 6416.64   1
   3 -13  24  13188. 4381.43   1
  -3 -13 -24  12072. 4397.43   1
   3  13  24 7450.26 3578.78   1
  -3  13 -24  22762. 6501.25   1
  -3  13 -24  11818. 4351.70   1
   3 -13  25 8996.10 3361.53   1
   3 -13  25 3560.48 2650.35   1
  -3 -13 -25 2700.66 2906.47   1
   3  13  25 1460.09 2879.03   1
  -3  13 -25 3581.06 2977.36   1
  -3  13 -25 5298.42 3119.14   1
   3 -13  26 2271.66 2577.18   1
   3 -13  26  812.26 2604.62   1
  -3 -13 -26   62.91 2661.79   1
   3  13  26  302.77 2824.15   1
  -3  13 -26 2009.60 2954.49   1
  -3  13 -26 2207.64 2835.58   1
   3 -13  27  16309. 4994.28   1
   3 -13  27  10752. 3953.80   1
  -3 -13 -27 5961.58 3299.79   1
   3  13  27 4363.13 3292.93   1
  -3  13 -27  15555. 5108.62   1
  -3  13 -27  12314. 4184.77   1
   3 -13  28 3619.94 2762.40   1
   3 -13  28 -286.99 2940.77   1
  -3 -13 -28 1112.74 2778.41   1
   3  13  28  385.09 2293.62   1
  -3  13 -28 4431.74 3194.60   1
  -3  13 -28 1976.90 2680.08   1
   3  15   0 6281.72 2359.93   1
   3  15   0 6242.85 2435.40   1
  -3 -15   0 4568.94 2000.68   1
  -3 -15   0  10487. 3013.95   1
   3 -15   0 4578.09 1935.05   1
   3 -15   0 4804.48 2581.75   1
  -3  15   0 2547.45 1635.95   1
  -3  15   0 3663.39 2568.03   1
   3 -15   1 5584.26 2102.22   1
   3 -15   1 1720.56 2332.49   1
  -3  15   1  12611. 3571.92   1
  -3  15   1 2337.07 2401.10   1
   3  15  -1 8984.67 2997.94   1
   3  15  -1 3075.69 1647.61   1
  -3 -15  -1 1440.43 1420.53   1
  -3 -15  -1 2821.86 1760.12   1
   3  15   1 4859.36 2307.34   1
   3  15   1 3860.05 2039.33   1
  -3 -15   1 2134.92 1348.04   1
  -3 -15   1 6755.08 2460.55   1
   3 -15  -1 3832.61 1955.18   1
   3 -15  -1 3041.39 2419.39   1
  -3  15  -1 8337.52 2689.23   1
  -3  15  -1 8872.62 3434.71   1
   3 -15   2  17247. 4564.37   1
   3 -15   2  28539. 7367.93   1
  -3  15   2  11843. 3473.58   1
  -3  15   2 9323.11 3482.73   1
   3  15  -2  22659. 5858.67   1
   3  15  -2  11777. 3212.89   1
  -3 -15  -2  57192.  13778.   1
  -3 -15  -2  10878. 3075.69   1
   3  15   2 8335.23 2666.36   1
   3  15   2  15381. 4310.54   1
  -3 -15   2  12897. 3393.55   1
   3 -15  -2  13028. 3674.82   1
   3 -15  -2  16595. 4852.50   1
  -3  15  -2  16622. 4395.15   1
  -3  15  -2  17690. 4994.28   1
   3 -15   3  21571. 5483.64  -1
   3 -15   3  19881. 5545.39  -1
  -3  15   3  15129. 4209.92  -1
  -3  15   3  20437. 5678.02  -1
   3  15  -3  20123. 5083.46  -1
   3  15  -3  24788. 6478.38  -1
  -3 -15  -3  19120. 4962.26  -1
  -3 -15  -3  12948. 3693.11  -1
   3  15   3  12433. 4022.41  -1
   3  15   3  29385. 7349.64  -1
  -3 -15   3  19540. 4889.09  -1
  -3 -15   3  21925. 5687.17  -1
   3 -15  -3  21363. 5613.99  -1
   3 -15  -3  17110. 4930.25  -1
  -3  15  -3  18667. 4868.51  -1
  -3  15  -3  17608. 4966.84  -1
   3 -15   4  30025. 7429.67   1
   3 -15   4  14564. 4390.57   1
  -3  15   4  25566. 6615.59   1
  -3  15   4  13460. 4075.00   1
   3  15  -4  31946. 7747.53   1
   3  15  -4  30482. 7763.54   1
  -3 -15  -4  25131. 6560.71   1
  -3 -15  -4  28127. 7015.77   1
   3  15   4  20599. 5396.75   1
   3  15   4  27190. 7681.22   1
  -3 -15   4  31923. 7713.23   1
  -3 -15   4  30254. 7562.31   1
   3 -15  -4  23394. 6066.77   1
   3 -15  -4  14576. 4431.74   1
  -3  15  -4  32906. 8081.40   1
  -3  15  -4  16840. 4770.18   1
   3 -15   5  94512.  22445.   1
   3 -15   5 107638.  25612.   1
  -3  15   5 112714.  26915.   1
   3  15  -5 114910.  27121.   1
   3  15  -5 107066.  25474.   1
  -3 -15  -5  89298.  21217.   1
  -3 -15  -5 128424.  30688.   1
   3  15   5 107981.  26229.   1
   3  15   5 143448.  33867.   1
  -3 -15   5  86897.  20549.   1
  -3 -15   5  78619.  18747.   1
   3 -15  -5 149142.  35422.   1
  -3  15  -5  80814.  19241.   1
  -3  15  -5 105031.  24971.   1
   3 -15   6 143242.  33867.   1
   3 -15   6 133638.  31672.   1
  -3  15   6 190212.  45049.   1
   3  15  -6 155477.  36611.   1
   3  15  -6 117882.  28013.   1
  -3 -15  -6 199657.  47427.   1
  -3 -15  -6 145758.  34416.   1
   3  15   6 157672.  37228.   1
   3  15   6 209376.  49943.   1
  -3 -15   6 163137.  38418.   1
  -3 -15   6 121747.  28836.   1
   3 -15  -6 200549.  47473.   1
  -3  15  -6 144706.  34210.   1
  -3  15  -6 166430.  39309.   1
   3 -15   7  84198.  20053.   1
   3 -15   7 119735.  28424.   1
  -3  15   7  94009.  22559.   1
   3  15  -7  83535.  19764.   1
  -3 -15  -7 106494.  25680.   1
  -3 -15  -7  80197.  19131.   1
   3  15   7  79648.  19744.   1
   3  15   7  85342.  20348.   1
  -3 -15   7  88909.  21024.   1
   3 -15  -7 107592.  25749.   1
  -3  15  -7  81546.  19415.   1
   3 -15   8  25657. 6478.38   1
   3 -15   8  16316. 4642.12   1
  -3  15   8  16572. 4653.55   1
   3  15  -8  23874. 5838.09   1
  -3 -15  -8  32289. 8040.24   1
  -3 -15  -8  27944. 7688.08   1
   3  15   8  26183. 7747.53   1
   3  15   8  13233. 4022.41   1
  -3 -15   8  30117. 7299.33   1
   3 -15  -8  24514. 6606.44   1
  -3  15  -8  25337. 6350.33   1
  -3  15  -8  31877. 8005.94   1
   3 -15   9  16378. 4452.32   1
   3 -15   9  15891. 4637.54   1
  -3  15   9  11752. 3690.83   1
   3  15  -9  10048. 2778.41   1
  -3 -15  -9  10496. 4216.78   1
  -3 -15  -9  10976. 3437.00   1
   3  15   9  15486. 4463.75   1
  -3 -15   9  13391. 3491.88   1
   3 -15  -9 9741.59 3485.02   1
  -3  15  -9  14160. 3848.61   1
  -3  15  -9  13240. 4054.42   1
   3 -15  10 3153.44 1791.67   1
   3 -15  10 5085.75 2627.48   1
  -3  15  10 7873.31 2991.08   1
   3  15 -10 4562.08 1655.61   1
  -3 -15 -10 5348.73 2645.78   1
   3  15  10 2869.88 2593.18   1
  -3 -15  10 3020.81 1385.55   1
   3 -15 -10 3555.91 2812.71   1
  -3  15 -10  14551. 3983.53   1
  -3  15 -10 6768.80 2860.73   1
   3 -15  11  27304. 6880.85   1
   3 -15  11  20777. 5655.15   1
  -3  15  11  25589. 6857.99   1
   3  15 -11  29705. 7242.16   1
  -3 -15 -11  23119. 6105.64   1
   3  15  11  29888. 7754.39   1
  -3 -15  11  23531. 5819.80   1
   3 -15 -11  25497. 7146.12   1
  -3  15 -11  26343. 6638.46   1
  -3  15 -11  33341. 8454.14   1
   3 -15  12 3501.03 1828.95   1
   3 -15  12 9375.71 3469.01   1
  -3  15  12 8584.49 4093.30   1
   3  15 -12 1402.24 1295.91   1
  -3 -15 -12 1795.79 2278.75   1
   3  15  12 1873.31 3055.11   1
  -3 -15  12  10039. 2808.14   1
   3 -15 -12  12810. 5170.36   1
  -3  15 -12 8012.80 2627.48   1
  -3  15 -12  10585. 3796.02   1
   3 -15  13  12360. 3526.18   1
   3 -15  13 3796.02 2739.54   1
  -3  15  13 4477.47 4040.70   1
   3  15 -13 5337.29 1889.09   1
  -3 -15 -13 7710.95 3590.21   1
   3  15  13 3279.21 3242.62   1
  -3 -15  13 4495.77 1825.29   1
   3 -15 -13 4493.48 4683.28   1
  -3  15 -13 3638.23 1872.17   1
  -3  15 -13 4813.62 3109.99   1
   3 -15  14  10469. 3160.30   1
   3 -15  14 9631.82 3565.05   1
  -3  15  14 8390.11 4475.18   1
   3  15 -14 6251.99 2175.16   1
  -3 -15 -14  11114. 4161.90   1
   3  15  14  11118. 4431.74   1
  -3 -15  14 8239.19 2808.14   1
   3 -15 -14  10890. 5931.85   1
  -3  15 -14 9426.01 2929.34   1
  -3  15 -14  10345. 3731.99   1
   3 -15  15  12225. 3553.62  -1
   3 -15  15  16053. 4838.78  -1
  -3  15  15  10510. 4749.60  -1
   3  15 -15  33295. 8236.90  -1
  -3 -15 -15  15545. 5072.03  -1
   3  15  15  20983. 6354.90  -1
  -3 -15  15  19284. 5234.39  -1
   3 -15 -15 9700.43 5767.20  -1
  -3  15 -15  15605. 4239.65  -1
  -3  15 -15  15248. 4619.25  -1
   3 -15  16  10942. 3281.50   1
   3 -15  16 9732.44 3606.22   1
  -3  15  16 2872.17 3743.42   1
   3  15 -16 8385.54 2812.71   1
  -3 -15 -16 4580.38 3464.44   1
   3  15  16 4653.55 3718.27   1
  -3 -15  16 9112.73 3160.30   1
   3 -15 -16 5266.40 5302.99   1
  -3  15 -16 5842.67 2350.79   1
  -3  15 -16 9588.37 3514.75   1
   3 -15  17 8890.91 2933.91   1
   3 -15  17 2627.48 2314.20   1
  -3  15  17 5758.06 4507.20   1
   3  15 -17 6453.23 2529.15   1
  -3 -15 -17 7944.20 4047.56   1
   3  15  17 5426.48 3942.37   1
  -3 -15  17 2659.50 2362.22   1
   3 -15 -17 2219.98 5165.79   1
  -3  15 -17 5426.48 2318.77   1
  -3  15 -17 2476.56 2471.98   1
   3 -15  18  10098. 3194.60   1
   3 -15  18  10085. 3633.66   1
  -3  15  18 7628.62 4882.23   1
   3  15 -18  13480. 3882.91   1
  -3 -15 -18  13366. 4964.55   1
   3  15  18  13254. 5076.60   1
  -3 -15  18  15509. 4610.10   1
   3 -15 -18 2730.39 5275.55   1
  -3  15 -18  16380. 4520.92   1
  -3  15 -18 9837.63 3802.88   1
   3 -15  19 1777.73 1782.76   1
   3 -15  19 6784.81 3311.22   1
  -3  15  19  224.33 3521.61   1
   3  15 -19 1127.83 2109.53   1
  -3 -15 -19 3043.67 3443.86   1
   3  15  19 1902.81 3379.83   1
  -3 -15  19 1962.50 2439.97   1
   3 -15 -19 2157.33 5193.23   1
  -3  15 -19 4600.96 2291.33   1
  -3  15 -19 5812.94 3254.06   1
   3 -15  20  22291. 5973.01   1
   3 -15  20  17315. 5213.81   1
  -3  15  20 9270.51 4646.69   1
   3  15 -20  33158. 8474.72   1
  -3 -15 -20  12742. 4690.14   1
   3  15  20  12929. 4831.92   1
  -3 -15  20  23188. 6304.59   1
   3 -15 -20 8250.62 5485.93   1
  -3  15 -20  24217. 6322.88   1
  -3  15 -20  17834. 5378.45   1
   3 -15  21  30048. 7774.98   1
   3 -15  21  27898. 7489.13   1
   3  15 -21  20846. 5719.18   1
  -3 -15 -21  13117. 4806.76   1
   3  15  21  12438. 4738.16   1
  -3 -15  21  24766. 6702.49   1
   3 -15 -21  13842. 5975.30   1
  -3  15 -21  27167. 7150.69   1
  -3  15 -21  16869. 5062.88   1
   3 -15  22  10912. 3855.47   1
   3 -15  22 6359.47 3158.01   1
   3  15 -22  11066. 3770.86   1
  -3 -15 -22 5895.26 3356.96   1
   3  15  22 2407.96 3066.54   1
  -3 -15  22  11578. 3965.24   1
  -3  15 -22 7363.36 3306.65   1
  -3  15 -22 6448.66 3217.47   1
   3 -15  23 6165.10 3082.55   1
   3 -15  23 4013.26 2771.55   1
   3  15 -23  766.75 2144.75   1
  -3 -15 -23  936.88 2844.73   1
   3  15  23 2787.56 3023.09   1
  -3 -15  23 3487.31 2401.10   1
  -3  15 -23 6736.79 3352.39   1
  -3  15 -23 6928.88 3130.57   1
   3 -15  24 6251.99 3071.12   1
   3 -15  24 5030.87 3039.10   1
   3  15 -24  10135. 3489.59   1
  -3 -15 -24 4971.41 3194.60   1
   3  15  24  309.86 2924.76   1
  -3  15 -24  10677. 4109.30   1
  -3  15 -24 5632.28 3048.25   1
   3 -15  25 2497.14 2668.65   1
   3 -15  25 1525.27 2570.32   1
   3  15 -25 2455.98 2129.20   1
  -3 -15 -25 1273.72 2869.88   1
   3  15  25 1468.56 3105.42   1
  -3  15 -25  138.90 2691.51   1
  -3  15 -25 6233.70 3489.59   1
   3 -15  26  18877. 5449.34   1
   3 -15  26 3297.50 3080.26   1
  -3 -15 -26  718.50 2929.34   1
   3  15  26   30.30 3126.00   1
  -3  15 -26 2302.76 2842.44   1
  -3  15 -26 1085.07 2940.77   1
   3  17   0 8044.81 2643.49  -1
   3  17   0 3498.74 2087.35  -1
  -3 -17   0 6636.17 2168.30  -1
  -3 -17   0 7507.42 2469.70  -1
   3 -17   0 3699.97 1846.33  -1
   3 -17   0 3905.78 2748.68  -1
  -3  17   0 2995.65 1638.69  -1
  -3  17   0 8589.06 3432.42  -1
   3 -17   1  10835. 3160.30   1
   3 -17   1  13478. 4376.85   1
  -3  17   1 4616.96 1846.79   1
  -3  17   1 6583.57 3272.35   1
   3  17  -1 2997.94 2075.23   1
   3  17  -1 4996.56 1857.76   1
  -3 -17  -1 2405.67 1762.40   1
  -3 -17  -1 1276.70 1576.49   1
   3  17   1 5778.64 2239.42   1
   3  17   1 3462.15 2205.81   1
  -3 -17   1 5040.01 1768.35   1
  -3 -17   1 4415.73 2148.87   1
   3 -17  -1 4466.04 2079.58   1
   3 -17  -1 5076.60 2867.59   1
  -3  17  -1 8886.34 2680.08   1
  -3  17  -1 9615.82 3626.80   1
   3 -17   2  20309. 5307.56   1
   3 -17   2  21756. 5957.00   1
  -3  17   2  14608. 4584.95   1
  -3  17   2  10414. 3082.55   1
   3  17  -2  13195. 3489.59   1
   3  17  -2  13613. 4049.85   1
  -3 -17  -2  10144. 3025.38   1
  -3 -17  -2  16327. 4466.04   1
   3  17   2  15136. 4244.22   1
  -3 -17   2  10576. 2892.75   1
  -3 -17   2 9597.52 3020.81   1
   3 -17  -2 7539.44 2552.02   1
   3 -17  -2  11964. 4177.91   1
  -3  17  -2  19136. 4943.97   1
  -3  17  -2  15637. 4795.33   1
   3 -17   3  13117. 3718.27   1
   3 -17   3  17956. 5106.33   1
  -3  17   3  15774. 4241.94   1
  -3  17   3  30071. 7848.15   1
   3  17  -3  22637. 6014.17   1
   3  17  -3  26664. 6583.57   1
  -3 -17  -3  13936. 3940.08   1
  -3 -17  -3  19001. 4946.26   1
   3  17   3  14345. 4221.35   1
   3  17   3  13851. 3985.82   1
   3 -17  -3  15349. 4235.07   1
   3 -17  -3  24880. 6720.78   1
  -3  17  -3 9737.01 2920.19   1
  -3  17  -3  37160. 9373.42   1
   3 -17   4  18331. 4809.05  -1
   3 -17   4  15859. 4589.52  -1
  -3  17   4 9652.40 3002.51  -1
   3  17  -4  11617. 3194.60  -1
   3  17  -4 8305.50 3242.62  -1
  -3 -17  -4 9778.17 3162.59  -1
  -3 -17  -4  17713. 4719.87  -1
   3  17   4  22394. 5849.53  -1
   3  17   4 3286.07 2673.22  -1
  -3 -17   4  28493. 6970.04  -1
  -3 -17   4  17224. 4644.40  -1
   3 -17  -4  15772. 4365.42  -1
   3 -17  -4  11797. 4148.18  -1
  -3  17  -4  14377. 3944.66  -1
  -3  17  -4  15552. 4626.11  -1
   3 -17   5  47496.  11532.   1
   3 -17   5  33135. 8364.96   1
  -3  17   5  39126. 9707.29   1
   3  17  -5  32266. 7866.45   1
   3  17  -5  22300. 6037.04   1
  -3 -17  -5  29019. 7306.19   1
  -3 -17  -5  40476.  10162.   1
   3  17   5  25292. 6485.24   1
   3  17   5  26275. 7651.49   1
  -3 -17   5  30345. 7379.37   1
  -3 -17   5  45644.  11098.   1
   3 -17  -5  45278.  11203.   1
  -3  17  -5  39355. 9613.53   1
  -3  17  -5  55934.  13654.   1
   3 -17   6  12977. 3615.36   1
   3 -17   6  40681.  10094.   1
  -3  17   6  13631. 4063.57   1
   3  17  -6  15072. 3855.47   1
   3  17  -6  18488. 5243.54   1
  -3 -17  -6  14583. 4209.92   1
  -3 -17  -6  23211. 6816.82   1
   3  17   6  12454. 6021.03   1
   3  17   6  10336. 3459.86   1
  -3 -17   6  13835. 3571.92   1
  -3 -17   6  17473. 4630.68   1
   3 -17  -6  23119. 6380.05   1
  -3  17  -6  10773. 3162.59   1
  -3  17  -6  13524. 4141.32   1
   3 -17   7  20336. 5232.10   1
   3 -17   7  20293. 5616.28   1
  -3  17   7  25154. 6702.49   1
   3  17  -7  18422. 4612.39   1
  -3 -17  -7  23599. 7212.43   1
  -3 -17  -7  13823. 3981.24   1
   3  17   7  13247. 6190.25   1
   3  17   7  19954. 5426.48   1
  -3 -17   7  19593. 4868.51   1
   3 -17  -7  25474. 6915.15   1
  -3  17  -7  29796. 7374.79   1
  -3  17  -7  13544. 4157.33   1
   3 -17   8  35330. 8653.09  -1
   3 -17   8  49348.  12127.  -1
  -3  17   8  36131. 9183.62  -1
   3  17  -8  45575.  10910.  -1
  -3 -17  -8  36016. 9958.83  -1
  -3 -17  -8  52916.  12801.  -1
   3  17   8  28767. 9037.27  -1
   3  17   8  45003.  11075.  -1
  -3 -17   8  40155. 9647.83  -1
   3 -17  -8  32769. 8600.50  -1
  -3  17  -8  48548.  11720.  -1
  -3  17  -8  40956.  10201.  -1
   3 -17   9  52504.  12675.   1
   3 -17   9  55774.  13647.   1
  -3  17   9  51681.  12735.   1
   3  17  -9  60439.  14391.   1
  -3 -17  -9  31077. 7823.00   1
  -3 -17  -9  28859. 8554.76   1
   3  17   9  47176.  11546.   1
  -3 -17   9  52115.  12447.   1
   3 -17  -9  26984. 7299.33   1
  -3  17  -9  52550.  12655.   1
  -3  17  -9  41436.  10334.   1
   3 -17  10  66888.  16030.  -1
   3 -17  10  81340.  19561.  -1
  -3  17  10 100114.  24011.  -1
   3  17 -10 103865.  24583.  -1
  -3 -17 -10  67276.  16140.  -1
  -3 -17 -10  69563.  17459.  -1
   3  17  10  46947.  12701.  -1
   3  17  10  71301.  17226.  -1
  -3 -17  10  71118.  16915.  -1
   3 -17 -10  44660.  11347.  -1
  -3  17 -10  59662.  14331.  -1
  -3  17 -10  72925.  17603.  -1
   3 -17  11  54265.  13099.   1
   3 -17  11  16016. 4692.43   1
  -3  17  11  22559. 6185.68   1
   3  17 -11  26938. 6633.88   1
  -3 -17 -11  15904. 5744.33   1
  -3 -17 -11  29819. 7626.34   1
   3  17  11  19067. 5522.52   1
  -3 -17  11  20398. 5152.06   1
   3 -17 -11  26961. 7473.12   1
  -3  17 -11  18790. 4918.82   1
  -3  17 -11  14811. 4644.40   1
   3 -17  12  31626. 7884.74   1
   3 -17  12  31809. 8111.13   1
  -3  17  12  24445. 6702.49   1
   3  17 -12  26183. 6482.96   1
  -3 -17 -12  25246. 6716.21   1
   3  17  12  42351.  10846.   1
  -3 -17  12  34324. 8371.82   1
   3 -17 -12  29751. 8049.39   1
  -3  17 -12  27601. 6942.60   1
  -3  17 -12  26778. 7084.37   1
   3 -17  13 5883.83 2364.51   1
   3 -17  13 3958.38 2545.16   1
  -3  17  13 4237.36 3256.34   1
   3  17 -13 8762.85 2590.90   1
  -3 -17 -13 4898.23 3043.67   1
   3  17  13 2009.83 3517.03   1
  -3 -17  13 7912.18 2467.41   1
   3 -17 -13 6711.63 3898.92   1
  -3  17 -13 9268.23 2952.20   1
  -3  17 -13 6592.72 3096.27   1
   3 -17  14 1647.15 1648.52   1
   3 -17  14 1514.29 2302.76   1
  -3  17  14 3235.76 3693.11   1
   3  17 -14 1040.02 1351.24   1
  -3 -17 -14 2286.76 2961.35   1
   3  17  14 2469.70 3665.67   1
  -3 -17  14 7834.43 2423.96   1
   3 -17 -14 3011.66 4674.13   1
  -3  17 -14 2228.90 1939.86   1
  -3  17 -14 2853.87 2863.02   1
   3 -17  15  36977. 9144.74   1
   3 -17  15  35445. 9021.26   1
  -3  17  15  30871. 8970.95   1
   3  17 -15  34622. 8465.58   1
  -3 -17 -15  34439. 9002.96   1
   3  17  15  40361.  10485.   1
  -3 -17  15  32792. 8147.72   1
   3 -17 -15  20906. 7768.12   1
  -3  17 -15  32975. 8287.21   1
  -3  17 -15  28241. 7566.88   1
   3 -17  16  19556. 5142.92   1
   3 -17  16  14228. 4500.34   1
  -3  17  16  11114. 5085.75   1
   3  17 -16  17578. 4607.82   1
  -3 -17 -16  11155. 4159.61   1
   3  17  16  11530. 4546.07   1
  -3 -17  16  27350. 7031.78   1
   3 -17 -16 1686.25 5305.28   1
  -3  17 -16  13526. 3921.79   1
  -3  17 -16  20855. 6066.77   1
   3 -17  17 3626.80 1994.05   1
   3 -17  17 3116.85 2602.33   1
  -3  17  17 1151.61 3750.28   1
   3  17 -17 2979.65 1937.11   1
  -3 -17 -17  253.60 3109.99   1
   3  17  17 4321.97 3494.17   1
  -3 -17  17 4150.46 2577.18   1
   3 -17 -17 1464.90 4751.88   1
  -3  17 -17  597.76 1706.61   1
  -3  17 -17 1472.44 2922.48   1
   3 -17  18  473.59 1610.11   1
   3 -17  18 2241.02 2627.48   1
  -3  17  18 6158.24 4260.23   1
   3  17 -18 6995.19 2757.83   1
  -3 -17 -18 3080.26 2922.48   1
   3  17  18  296.36 3109.99   1
  -3 -17  18 5630.00 2755.54   1
   3 -17 -18 5051.45 5017.15   1
  -3  17 -18 3855.47 2099.93   1
  -3  17 -18 4674.13 2952.20   1
   3 -17  19 4308.25 2298.19   1
   3 -17  19 3663.39 2712.09   1
  -3  17  19 2847.01 4118.45   1
   3  17 -19 7466.26 3004.80   1
  -3 -17 -19 4175.62 2949.92   1
   3  17  19 3265.49 3270.06   1
  -3 -17  19 6896.86 3379.83   1
   3 -17 -19 3944.66 4793.04   1
  -3  17 -19 4882.23 2485.71   1
  -3  17 -19 2648.07 2794.42   1
   3 -17  20 3969.81 2311.91   1
   3 -17  20 2867.59 2570.32   1
  -3  17  20 2050.54 3565.05   1
   3  17 -20  12241. 3953.80   1
  -3 -17 -20 -449.35 2654.93   1
   3  17  20  961.35 2753.26   1
  -3 -17  20 2565.74 2721.24   1
   3 -17 -20  703.64 4033.84   1
  -3  17 -20 5405.89 2577.18   1
  -3  17 -20 4159.61 2888.17   1
   3 -17  21 8472.44 3105.42   1
   3 -17  21 3000.23 2803.56   1
  -3  17  21 1467.87 3750.28   1
   3  17 -21  10423. 3645.09   1
  -3 -17 -21 4536.93 2904.18   1
   3  17  21 3734.27 3039.10   1
  -3 -17  21 6327.46 3061.97   1
   3 -17 -21 3347.81 4129.88   1
  -3  17 -21 5241.25 2732.68   1
  -3  17 -21 3992.68 3002.51   1
   3 -17  22 4907.38 2689.23   1
   3 -17  22 5767.20 3041.39   1
  -3  17  22  723.30 3624.51   1
   3  17 -22 5485.93 2885.89   1
  -3 -17 -22 1157.56 2691.51   1
   3  17  22 2389.66 3002.51   1
  -3 -17  22 2785.27 2584.04   1
   3 -17 -22 1435.17 4054.42   1
  -3  17 -22  978.96 2321.06   1
  -3  17 -22 6071.34 3093.98   1
   3 -17  23 1892.06 2327.92   1
   3 -17  23  740.68 2860.73   1
   3  17 -23 1665.90 2222.50   1
  -3 -17 -23 2478.85 2808.14   1
   3  17  23 2581.75 3075.69   1
  -3 -17  23  11004. 3958.38   1
   3 -17 -23 1622.23 4411.15   1
  -3  17 -23 4177.91 2817.29   1
  -3  17 -23 4376.85 3114.56   1
   3 -17  24 2808.14 2561.17   1
   3 -17  24 1481.13 2901.90   1
   3  17 -24 1622.68 2330.21   1
  -3 -17 -24  109.88 2764.69   1
   3  17  24 1124.17 3007.09   1
  -3 -17  24 1222.04 2339.35   1
  -3  17 -24 1793.96 2666.36   1
  -3  17 -24 3503.31 2952.20   1
   3  19   0 9810.19 3219.75   1
   3  19   0  12015. 3622.22   1
  -3 -19   0 9172.18 2803.56   1
  -3 -19   0  13860. 3780.01   1
   3 -19   0 6386.91 2414.82   1
   3 -19   0  12236. 4312.82   1
  -3  19   0 8627.94 2718.95   1
  -3  19   0  15276. 5131.48   1
   3 -19   1 8991.53 2826.43   1
   3 -19   1 6183.39 3345.53   1
  -3  19   1 7525.72 2513.15   1
  -3  19   1 7276.46 3695.40   1
   3  19  -1 8161.44 2986.51   1
   3  19  -1  11020. 3212.89   1
  -3 -19  -1  11857. 3601.64   1
  -3 -19  -1 8234.61 2606.90   1
   3  19   1 4113.88 2262.06   1
   3  19   1  18241. 5122.34   1
  -3 -19   1  12156. 3359.25   1
  -3 -19   1 7063.79 2467.41   1
   3 -19  -1  10025. 3036.81   1
   3 -19  -1  20206. 5874.68   1
  -3  19  -1 9821.62 2954.49   1
  -3  19  -1 4571.23 3304.36   1
   3 -19   2 3109.99 1781.38   1
   3 -19   2 5069.74 3322.66   1
  -3  19   2 5097.18 2161.90   1
  -3  19   2 5664.30 3437.00   1
   3  19  -2 6448.66 3068.83   1
   3  19  -2 7868.73 2469.70   1
  -3 -19  -2 5218.38 2563.46   1
  -3 -19  -2  14361. 3898.92   1
   3  19   2 7429.67 2776.12   1
   3  19   2 4857.07 2629.77   1
  -3 -19   2 7166.70 2285.84   1
  -3 -19   2 7989.93 2771.55   1
   3 -19  -2 4289.96 1984.91   1
   3 -19  -2 6485.24 3343.24   1
  -3  19  -2 7349.64 2449.12   1
  -3  19  -2 6540.13 3802.88   1
   3 -19   3 9215.63 2888.17   1
   3 -19   3  22486. 6203.97   1
  -3  19   3  17045. 4619.25   1
  -3  19   3  12655. 4550.65   1
   3  19  -3  11957. 3322.66   1
   3  19  -3  15360. 4745.02   1
  -3 -19  -3  11992. 3427.85   1
  -3 -19  -3 7880.17 2991.08   1
   3  19   3  14233. 4328.83   1
   3  19   3 6121.65 2538.30   1
  -3 -19   3  12762. 3464.44   1
   3 -19  -3 5332.72 2220.67   1
   3 -19  -3  15689. 4916.53   1
  -3  19  -3 7383.94 2545.16   1
  -3  19  -3  24628. 6816.82   1
   3 -19   4  27738. 6976.90   1
   3 -19   4  23416. 6377.77   1
  -3  19   4  25360. 6540.13   1
   3  19  -4  27372. 6791.67   1
   3  19  -4  21852. 6162.81   1
  -3 -19  -4  30322. 7534.87   1
  -3 -19  -4  25657. 6734.50   1
   3  19   4  27784. 7363.36   1
   3  19   4  28950. 7290.18   1
  -3 -19   4  31855. 7809.28   1
  -3 -19   4  43769.  10697.   1
   3 -19  -4  28196. 7173.56   1
   3 -19  -4  26229. 7157.55   1
  -3  19  -4  23942. 6091.92   1
  -3  19  -4  31054. 8134.00   1
   3 -19   5  35719. 8820.02   1
   3 -19   5  32060. 8252.91   1
  -3  19   5  47976.  11797.   1
   3  19  -5  28173. 7530.29   1
   3  19  -5  34690. 8472.44   1
  -3 -19  -5  21809. 5968.44   1
  -3 -19  -5  60896.  14594.   1
   3  19   5  28859. 7836.72   1
   3  19   5  33592. 8344.38   1
  -3 -19   5  36154. 8801.73   1
  -3 -19   5  44203.  10780.   1
   3 -19  -5  36245. 9144.74   1
  -3  19  -5  42762.  10446.   1
  -3  19  -5  37068. 9469.46   1
   3 -19   6  41962.  10277.   1
   3 -19   6  45072.  11114.   1
  -3  19   6  41848.  10444.   1
   3  19  -6  50903.  12227.   1
   3  19  -6  23256. 6446.37   1
  -3 -19  -6  39401. 9634.11   1
  -3 -19  -6  36062. 9343.69   1
   3  19   6  32152. 8021.94   1
   3  19   6  35742. 9787.32   1
  -3 -19   6  49737.  11948.   1
  -3 -19   6  34210. 8465.58   1
   3 -19  -6  38395. 9755.31   1
  -3  19  -6  40773. 9986.27   1
  -3  19  -6  46215.  11411.   1
   3 -19   7  24628. 6263.43   1
   3 -19   7  26481. 6844.26   1
  -3  19   7  30482. 7893.89   1
   3  19  -7  24491. 6075.92   1
  -3 -19  -7  32586. 8074.54   1
  -3 -19  -7  36931. 9766.74   1
   3  19   7  32609. 9522.06   1
   3  19   7  24514. 6322.88   1
  -3 -19   7  29888. 7326.77   1
   3 -19  -7  33753. 8737.70   1
  -3  19  -7  29408. 7356.50   1
  -3  19  -7  18603. 5216.09   1
   3 -19   8  12385. 3539.90   1
   3 -19   8  11297. 3663.39   1
  -3  19   8  13199. 4319.68   1
   3  19  -8  13611. 3599.36   1
  -3 -19  -8  16536. 4539.21   1
  -3 -19  -8  15461. 5904.41   1
   3  19   8  10149. 5655.15   1
   3  19   8  16167. 4555.22   1
  -3 -19   8  12294. 3311.22   1
   3 -19  -8  12296. 4257.94   1
  -3  19  -8  12934. 3649.67   1
  -3  19  -8  17391. 4946.26   1
   3 -19   9  10149. 3071.12   1
   3 -19   9 6320.60 3007.09   1
  -3  19   9 7367.93 3306.65   1
   3  19  -9  10958. 3016.23   1
  -3 -19  -9  26023. 6627.02   1
  -3 -19  -9  12033. 5657.44   1
   3  19   9  10702. 5881.54   1
   3  19   9 8225.47 3020.81   1
  -3 -19   9 8852.04 2586.32   1
   3 -19  -9 5835.81 3244.91   1
  -3  19  -9  11013. 3258.63   1
  -3  19  -9 8820.02 3496.45   1
   3 -19  10  16145. 4399.72   1
   3 -19  10  13826. 4246.51   1
  -3  19  10  10105. 3844.04   1
   3  19 -10  13044. 3485.02   1
  -3 -19 -10  13595. 5929.56   1
  -3 -19 -10  13878. 4145.89   1
   3  19  10 7271.89 5444.77   1
   3  19  10  10892. 4042.99   1
  -3 -19  10  11233. 3121.42   1
   3 -19 -10  12294. 4349.41   1
  -3  19 -10  15975. 4335.69   1
  -3  19 -10  12605. 4111.59   1
   3 -19  11 3306.65 1758.52   1
   3 -19  11 4745.02 2666.36   1
  -3  19  11 4285.38 3052.82   1
   3  19 -11 3270.06 1524.58   1
  -3 -19 -11 1678.02 4363.13   1
  -3 -19 -11 4168.76 2755.54   1
   3  19  11 1429.22 4543.79   1
   3  19  11 1595.47 2789.84   1
  -3 -19  11 4836.49 1927.51   1
   3 -19 -11 2149.09 2824.15   1
  -3  19 -11 2161.90 1657.67   1
  -3  19 -11 5005.71 2872.17   1
   3 -19  12  11123. 3260.92   1
   3 -19  12  14455. 4584.95   1
  -3  19  12 5174.93 3441.57   1
   3  19 -12  19339. 4934.82   1
  -3 -19 -12 6370.91 3313.51   1
  -3 -19 -12 3958.38 4422.59   1
   3  19  12 3372.97 4349.41   1
   3  19  12  12408. 4655.84   1
  -3 -19  12  14368. 3871.48   1
   3 -19 -12 4761.03 3400.41   1
  -3  19 -12  10418. 3171.73   1
  -3  19 -12  11944. 4239.65   1
   3 -19  13  14761. 4120.74   1
   3 -19  13 3581.06 2549.73   1
  -3  19  13 5250.40 3866.91   1
   3  19 -13  13229. 3594.78   1
  -3 -19 -13 5282.41 3334.09   1
  -3 -19 -13 4427.16 4301.39   1
   3  19  13 7951.06 3985.82   1
  -3 -19  13  12127. 3331.81   1
   3 -19 -13 7672.07 4022.41   1
  -3  19 -13  11111. 3272.35   1
  -3  19 -13 7834.43 3292.93   1
   3 -19  14 3295.22 1887.72   1
   3 -19  14 2693.80 2373.65   1
  -3  19  14 3343.24 3667.96   1
  -3 -19 -14 2097.64 3016.23   1
   3  19  14 3265.49 3160.30   1
  -3 -19  14 5389.89 2046.88   1
   3 -19 -14 2462.84 4065.85   1
  -3  19 -14  21546. 5678.02   1
  -3  19 -14 6062.19 2945.34   1
   3 -19  15 8998.39 2963.64   1
   3 -19  15 1246.28 2265.03   1
  -3  19  15 7957.92 4367.71   1
   3  19 -15 3654.24 1769.26   1
  -3 -19 -15 1553.17 2847.01   1
   3  19  15 1547.22 2927.05   1
  -3 -19  15 1165.79 1502.17   1
   3 -19 -15 1143.61 3892.06   1
  -3  19 -15 5046.87 2373.65   1
  -3  19 -15 1977.36 2531.44   1
   3 -19  16 6293.16 2471.98   1
   3 -19  16 7710.95 3160.30   1
  -3  19  16  13105. 5355.59   1
   3  19 -16 6974.61 2398.81   1
  -3 -19 -16 7159.84 3187.74   1
   3  19  16 1852.73 3013.95   1
  -3 -19  16 7050.07 2494.85   1
   3 -19 -16 2240.79 4386.00   1
  -3  19 -16 8884.05 3126.00   1
  -3  19 -16  10370. 3759.43   1
   3 -19  17 2062.43 1867.14   1
   3 -19  17 3537.61 2581.75   1
  -3  19  17  893.44 3837.18   1
   3  19 -17 1711.18 1655.61   1
  -3 -19 -17 1976.90 2732.68   1
   3  19  17 1155.27 2659.50   1
  -3 -19  17  569.86 1705.92   1
   3 -19 -17 1410.93 4097.87   1
  -3  19 -17 1954.26 2094.21   1
  -3  19 -17 2132.17 2634.34   1
   3 -19  18 4978.27 2327.92   1
   3 -19  18 5838.09 2851.59   1
  -3  19  18 2244.22 3617.65   1
   3  19 -18 3768.58 2014.86   1
  -3 -19 -18 3370.68 2622.91   1
   3  19  18 5035.44 3240.34   1
  -3 -19  18 5188.65 2554.31   1
   3 -19 -18  838.55 4198.49   1
  -3  19 -18 6482.96 2833.29   1
  -3  19 -18 7402.23 3263.20   1
   3 -19  19  12209. 3748.00  -1
   3 -19  19 4445.46 2686.94  -1
  -3  19  19 4621.54 4246.51  -1
   3  19 -19  11454. 3576.49  -1
  -3 -19 -19 2055.34 2737.25  -1
   3  19  19 6334.32 3256.34  -1
  -3 -19  19 9817.05 3535.33  -1
   3 -19 -19 2652.64 4475.18  -1
  -3  19 -19  10599. 3619.94  -1
  -3  19 -19 6821.40 3146.58  -1
   3 -19  20 2595.47 2078.43   1
   3 -19  20 5124.62 2821.86   1
  -3  19  20  -65.10 4411.15   1
   3  19 -20 4863.93 2510.86   1
  -3 -19 -20 1021.27 2526.87   1
   3  19  20 2888.17 2881.31   1
  -3 -19  20 5787.78 2881.31   1
   3 -19 -20  731.08 4841.07   1
  -3  19 -20 3473.58 2439.97   1
  -3  19 -20 3167.16 2913.33   1
   3 -19  21 4898.23 2405.67   1
   3 -19  21 2984.22 2702.95   1
  -3  19  21 5218.38 5346.44   1
   3  19 -21 6787.10 2863.02   1
  -3 -19 -21 5787.78 3087.12   1
   3  19  21  501.94 2952.20   1
  -3 -19  21 3446.14 2794.42   1
   3 -19 -21 2011.20 5581.98   1
  -3  19 -21 8525.03 3196.89   1
  -3  19 -21 6606.44 3336.38   1
   3  21   0 1421.68 2167.16   1
   3  21   0  948.09 2201.92   1
  -3 -21   0 1540.82 1651.04   1
  -3 -21   0  924.08 1605.76   1
   3 -21   0 1295.68 1790.99   1
   3 -21   0 1466.27 2129.66   1
  -3  21   0 1544.93 1773.38   1
  -3  21   0  187.40 2194.60   1
   3 -21   1 2280.35 1881.09  -1
   3 -21   1 4589.52 2645.78  -1
  -3  21   1 3743.42 2286.76  -1
  -3  21   1 9089.86 3313.51  -1
   3  21  -1 2911.04 2291.33  -1
   3  21  -1 7278.75 2693.80  -1
  -3 -21  -1  13727. 4180.19  -1
  -3 -21  -1 5396.75 2117.99  -1
   3  21   1 3119.14 2600.04  -1
   3  21   1 9906.23 3663.39  -1
  -3 -21   1 5465.35 2314.20  -1
  -3 -21   1 8515.88 2604.62  -1
   3 -21  -1 4411.15 2236.68  -1
   3 -21  -1 3715.98 2602.33  -1
  -3  21  -1 4740.45 2245.37  -1
  -3  21  -1 7470.84 3020.81  -1
   3 -21   2 1694.03 1795.33   1
   3 -21   2  744.11 2087.81   1
  -3  21   2 3542.19 2278.98   1
  -3  21   2 6524.12 2908.76   1
   3  21  -2 2778.41 2474.27   1
   3  21  -2 6256.57 2412.53   1
  -3 -21  -2 7363.36 2510.86   1
  -3 -21  -2 2327.92 2321.06   1
   3  21   2  841.53 2604.62   1
   3  21   2 1782.53 2476.56   1
  -3 -21   2 1656.76 1715.53   1
  -3 -21   2 2334.78 1659.04   1
   3 -21  -2 3713.69 2123.03   1
   3 -21  -2  -62.95 2059.68   1
  -3  21  -2 3567.34 2020.58   1
  -3  21  -2 4470.61 2584.04   1
   3 -21   3 8385.54 2835.58   1
   3 -21   3 7040.93 2991.08   1
  -3  21   3 7505.14 2965.92   1
  -3  21   3 8424.41 3233.47   1
   3  21  -3 8266.63 2760.12   1
   3  21  -3 5959.29 2911.04   1
  -3 -21  -3 8474.72 2764.69   1
  -3 -21  -3  12241. 4273.95   1
   3  21   3  10890. 4036.13   1
   3  21   3  22367. 6011.89   1
  -3 -21   3  10135. 3144.29   1
  -3 -21   3 8419.84 2574.89   1
   3 -21  -3  10661. 3420.99   1
   3 -21  -3 5076.60 2792.13   1
  -3  21  -3  15138. 4257.94   1
  -3  21  -3  12344. 4031.55   1
   3 -21   4 3731.99 1930.02   1
   3 -21   4 6739.07 2815.00   1
  -3  21   4 9329.97 3398.12   1
   3  21  -4 6165.10 2316.49   1
   3  21  -4 4411.15 2597.76   1
  -3 -21  -4 8348.95 3578.78   1
  -3 -21  -4 4150.46 2104.50   1
   3  21   4 6793.96 2835.58   1
   3  21   4 6997.48 3384.40   1
  -3 -21   4 3100.84 1809.97   1
  -3 -21   4 8831.46 2693.80   1
   3 -21  -4 2828.72 2144.52   1
   3 -21  -4 7541.73 3075.69   1
  -3  21  -4 3203.75 1899.61   1
  -3  21  -4 3850.90 2554.31   1
   3 -21   5 8655.38 2801.28   1
   3 -21   5 7560.02 2931.62   1
  -3  21   5 9183.62 3549.05   1
   3  21  -5  11127. 3247.20   1
   3  21  -5  10832. 3821.17   1
  -3 -21  -5 5863.25 2396.52   1
  -3 -21  -5 6133.08 3260.92   1
   3  21   5 3709.12 3139.72   1
   3  21   5 7361.07 2922.48   1
  -3 -21   5 9387.14 2876.74   1
  -3 -21   5 9375.71 2885.89   1
   3 -21  -5 5399.03 2641.20   1
  -3  21  -5 4038.41 2206.26   1
  -3  21  -5  10329. 3780.01   1
   3 -21   6 8552.47 2757.83   1
   3 -21   6  13156. 4132.17   1
  -3  21   6  14921. 4777.04   1
   3  21  -6  13910. 3791.44   1
   3  21  -6 3942.37 2709.81   1
  -3 -21  -6 6711.63 2556.59   1
  -3 -21  -6  10983. 4193.91   1
   3  21   6 8044.81 4097.87   1
   3  21   6 6986.04 2929.34   1
  -3 -21   6 8419.84 2602.33   1
  -3 -21   6  11333. 3247.20   1
   3 -21  -6  12252. 4171.05   1
  -3  21  -6  10476. 3249.48   1
  -3  21  -6  16321. 4745.02   1
   3 -21   7 7553.16 2563.46   1
   3 -21   7 6899.15 2741.82   1
  -3  21   7 8019.66 3624.51   1
   3  21  -7 1750.74 1395.38   1
   3  21  -7 1738.62 2517.72   1
  -3 -21  -7 -304.14 2609.19   1
  -3 -21  -7 9878.79 3183.17   1
   3  21   7 2741.82 4118.45   1
   3  21   7 1976.22 2412.53   1
  -3 -21   7 5216.09 1940.31   1
   3 -21  -7  949.92 2611.48   1
  -3  21  -7 6446.37 2458.26   1
  -3  21  -7 8989.24 3228.90   1
   3 -21   8  18294. 4863.93   1
   3 -21   8  20332. 5403.61   1
  -3  21   8  12113. 4466.04   1
   3  21  -8  15847. 4150.46   1
  -3 -21  -8 9382.57 3119.14   1
  -3 -21  -8  15237. 5600.27   1
   3  21   8  15872. 5908.98   1
   3  21   8  16375. 4788.47   1
  -3 -21   8  12303. 3384.40   1
   3 -21  -8  12289. 4404.29   1
  -3  21  -8 6999.76 2462.84   1
  -3  21  -8  11726. 3743.42   1
   3 -21   9 4852.50 2058.08   1
   3 -21   9 2207.64 1989.02   1
  -3  21   9 1297.73 2764.69   1
   3  21  -9 3439.28 1622.00   1
  -3 -21  -9 7196.43 2831.01   1
  -3 -21  -9 4733.59 3736.56   1
   3  21   9 2391.95 4303.68   1
   3  21   9 3439.28 2746.40   1
  -3 -21   9 4863.93 1842.90   1
   3 -21  -9 2817.29 3368.39   1
  -3  21  -9 3420.99 1905.33   1
  -3  21  -9 3324.95 2545.16   1
   3 -21  10  16881. 4525.49  -1
   3 -21  10  14894. 4301.39  -1
  -3  21  10  13014. 4667.27  -1
   3  21 -10  15783. 4116.16  -1
  -3 -21 -10  26138. 7795.56  -1
  -3 -21 -10  11404. 3683.97  -1
   3  21  10 9073.85 5065.17  -1
   3  21  10  15813. 4985.13  -1
  -3 -21  10  18157. 4678.71  -1
   3 -21 -10 8858.90 4152.75  -1
  -3  21 -10  21740. 5662.01  -1
  -3  21 -10  13147. 4061.28  -1
   3 -21  11 8815.45 2824.15   1
   3 -21  11  11441. 3802.88   1
  -3  21  11 6400.63 3679.39   1
   3  21 -11  16897. 4367.71   1
  -3 -21 -11 8831.46 4644.40   1
  -3 -21 -11 5906.69 2984.22   1
   3  21  11 1929.11 3793.73   1
   3  21  11 8920.64 3651.95   1
  -3 -21  11  14439. 3848.61   1
   3 -21 -11 9624.96 4459.18   1
  -3  21 -11  11548. 3395.83   1
  -3  21 -11  14320. 4328.83   1
   3 -21  12  15072. 4141.32   1
   3 -21  12 3663.39 2657.21   1
  -3  21  12 1179.74 3075.69   1
   3  21 -12 1974.61 1424.65   1
  -3 -21 -12 -776.81 2458.26   1
  -3 -21 -12  193.87 3699.97   1
   3  21  12  647.38 3414.13   1
   3  21  12 2350.79 3080.26   1
  -3 -21  12 3171.73 1571.23   1
   3 -21 -12  354.68 3084.84   1
  -3  21 -12 9645.54 3077.98   1
  -3  21 -12 2389.66 2734.96   1
   3 -21  13 5081.17 2218.15   1
   3 -21  13 3240.34 2405.67   1
  -3  21  13 4456.89 3432.42   1
   3  21 -13 6800.82 2330.21   1
  -3 -21 -13 1613.76 3562.77   1
  -3 -21 -13 3544.47 2794.42   1
   3  21  13   52.64 3585.64   1
   3  21  13 3784.58 2913.33   1
  -3 -21  13  17693. 4685.57   1
   3 -21 -13 5453.92 3743.42   1
  -3  21 -13 4065.85 2158.24   1
  -3  21 -13 3020.81 2840.15   1
   3 -21  14 8804.02 3087.12   1
   3 -21  14 6219.98 2757.83   1
  -3  21  14 7043.21 4216.78   1
   3  21 -14 8120.28 2634.34   1
  -3 -21 -14 3715.98 3839.47   1
  -3 -21 -14 5943.28 3123.71   1
   3  21  14 7066.08 3318.09   1
   3  21  14  -62.61 3219.75   1
  -3 -21  14 6917.44 2451.40   1
   3 -21 -14 5252.68 3780.01   1
  -3  21 -14  14567. 4198.49   1
  -3  21 -14 4308.25 2728.10   1
   3 -21  15 7525.72 2778.41   1
   3 -21  15 6956.32 2867.59   1
  -3  21  15 1730.62 3699.97   1
   3  21 -15 5170.36 2195.52   1
  -3 -21 -15 5783.21 2917.90   1
  -3 -21 -15  902.81 3633.66   1
   3  21  15  714.15 2915.62   1
  -3 -21  15 7633.20 2552.02   1
   3 -21 -15 4502.63 4175.62   1
  -3  21 -15 7399.95 2908.76   1
  -3  21 -15 4891.37 2780.70   1
   3 -21  16 1522.07 1939.40   1
   3 -21  16 1473.36 2237.59   1
  -3  21  16 1690.14 4008.69   1
   3  21 -16 1349.87 1639.38   1
  -3 -21 -16 1167.62 2636.63   1
   3  21  16 1367.25 2849.30   1
  -3 -21  16 1300.48 1679.39   1
   3 -21 -16 1449.58 4116.16   1
  -3  21 -16 4834.21 2517.72   1
  -3  21 -16 1903.50 2529.15   1
   3 -21  17 2744.11 2161.90   1
   3 -21  17 2847.01 2627.48   1
  -3  21  17 -172.40 4610.10   1
   3  21 -17 2737.25 1775.44   1
  -3 -21 -17  702.72 2499.43   1
   3  21  17 1581.52 2689.23   1
  -3 -21  17  777.95 1620.85   1
   3 -21 -17 1422.82 4539.21   1
  -3  21 -17 4321.97 2520.01   1
  -3  21 -17  929.57 2600.04   1
   3 -21  18 2981.93 2125.31   1
   3 -21  18 1994.05 2579.46   1
  -3  21  18   80.13 5172.65   1
   3  21 -18 1632.52 1652.41   1
  -3 -21 -18 3249.48 2963.64   1
   3  21  18  939.63 2709.81   1
  -3 -21  18  515.21 1650.58   1
   3 -21 -18 -1177.2 5380.74   1
  -3  21 -18 5131.48 2572.60   1
  -3  21 -18 2179.74 2668.65   1
   3  23   0 4267.09 2325.63   1
   3  23   0 3695.40 2460.55   1
  -3 -23   0 3160.30 2170.82   1
  -3 -23   0 2538.30 1555.91   1
   3 -23   0 4616.96 2396.52   1
   3 -23   0 3185.45 2643.49   1
  -3  23   0 5666.58 2554.31   1
  -3  23   0 1519.55 2449.12   1
   3 -23   1 1030.64 1949.69   1
   3 -23   1 1575.80 2273.72   1
  -3  23   1 4911.96 2627.48   1
  -3  23   1 4093.30 2952.20   1
   3  23  -1 3151.15 2153.67   1
   3  23  -1 1920.88 2337.07   1
  -3 -23  -1 5776.35 2166.25   1
  -3 -23  -1 2881.31 2396.52   1
   3  23   1 6247.42 3139.72   1
   3  23   1 2794.42 2378.23   1
  -3 -23   1 6380.05 2222.96   1
  -3 -23   1 4777.04 2300.48   1
   3 -23  -1 4749.60 2394.24   1
   3 -23  -1 5616.28 2780.70   1
  -3  23  -1 6954.03 2810.43   1
  -3  23  -1 3146.58 2773.84   1
   3 -23   2 4767.89 2387.37   1
   3 -23   2 3647.38 2677.79   1
  -3  23   2 4779.32 2680.08   1
  -3  23   2 3414.13 2629.77   1
   3  23  -2 5250.40 2375.94   1
   3  23  -2 1230.96 2126.91   1
  -3 -23  -2 1869.42 1669.79   1
  -3 -23  -2 1900.07 2675.51   1
   3  23   2 2849.30 2940.77   1
   3  23   2 1239.42 2327.92   1
  -3 -23   2 5442.48 2145.21   1
  -3 -23   2 4136.74 2011.20   1
   3 -23  -2 2362.22 2037.04   1
   3 -23  -2 7555.45 3242.62   1
  -3  23  -2 3510.17 2225.47   1
  -3  23  -2 5735.19 2858.45   1
   3 -23   3 1823.46 1912.87  -1
   3 -23   3 6393.77 2821.86  -1
  -3  23   3 7896.17 3093.98  -1
  -3  23   3 3587.92 2689.23  -1
   3  23  -3 5517.95 2394.24  -1
   3  23  -3 6912.87 3080.26  -1
  -3 -23  -3 5609.42 2286.30  -1
  -3 -23  -3 5790.07 3407.27  -1
   3  23   3 1936.43 2689.23  -1
   3  23   3 4969.12 2529.15  -1
  -3 -23   3 3066.54 2006.63  -1
  -3 -23   3 5723.75 2177.68  -1
   3 -23  -3 6414.35 2860.73  -1
   3 -23  -3 3018.52 2460.55  -1
  -3  23  -3 8156.86 2988.79  -1
  -3  23  -3 8390.11 3430.14  -1
   3 -23   4 4870.79 2394.24  -1
   3 -23   4 2492.57 2604.62  -1
  -3  23   4  30094. 7932.76  -1
   3  23  -4 3315.80 1851.82  -1
   3  23  -4 5934.14 3018.52  -1
  -3 -23  -4 2561.17 1914.47  -1
  -3 -23  -4 5973.01 3167.16  -1
   3  23   4 5092.61 3448.43  -1
   3  23   4 3185.45 2474.27  -1
  -3 -23   4 2508.57 1943.74  -1
  -3 -23   4 6665.90 2282.64  -1
   3 -23  -4 8465.58 3299.79  -1
   3 -23  -4 3219.75 2481.13  -1
  -3  23  -4 7802.42 2883.60  -1
  -3  23  -4  21621. 5860.96  -1
   3 -23   5 4619.25 2209.47   1
   3 -23   5 9588.37 3334.09   1
  -3  23   5  10352. 3892.06   1
   3  23  -5  10590. 3272.35   1
   3  23  -5 3009.37 2851.59   1
  -3 -23  -5 8534.18 2769.26   1
  -3 -23  -5 8044.81 3839.47   1
   3  23   5 7875.59 3601.64   1
   3  23   5 4662.70 2515.43   1
  -3 -23   5  16051. 4418.02   1
  -3 -23   5 6665.90 2366.79   1
   3 -23  -5 5412.75 2782.98   1
  -3  23  -5 5120.05 2568.03   1
  -3  23  -5  21038. 5822.08   1
   3 -23   6 8081.40 2879.03   1
   3 -23   6 8282.64 3247.20   1
  -3  23   6 9329.97 3953.80   1
   3  23  -6 3283.78 2606.90   1
   3  23  -6  12387. 3613.08   1
  -3 -23  -6 4276.24 2986.51   1
  -3 -23  -6 5426.48 2382.80   1
   3  23   6 7075.23 3825.75   1
   3  23   6  12246. 3800.59   1
  -3 -23   6 5593.41 2125.31   1
  -3 -23   6 3363.82 1853.19   1
   3 -23  -6 3709.12 2883.60   1
  -3  23  -6 6231.41 2728.10   1
  -3  23  -6 4861.65 2604.62   1
   3 -23   7 3560.48 2067.69   1
   3 -23   7 7372.51 2883.60   1
  -3  23   7 8497.59 3914.93   1
   3  23  -7 4740.45 2110.45   1
   3  23  -7  668.19 2673.22   1
  -3 -23  -7 4575.80 3485.02   1
  -3 -23  -7 6169.67 2398.81   1
   3  23   7 6025.61 3487.31   1
   3  23   7 4911.96 2634.34   1
  -3 -23   7 3834.89 1879.94   1
   3 -23  -7 4200.77 3233.47   1
  -3  23  -7 7777.26 2892.75   1
  -3  23  -7 4594.10 2789.84   1
   3 -23   8 2446.83 1867.59   1
   3 -23   8 4299.10 2547.45   1
  -3  23   8 6805.39 3930.94   1
   3  23  -8 2766.98 1720.33   1
  -3 -23  -8 2033.61 2148.64   1
  -3 -23  -8 3951.52 3032.24   1
   3  23   8  965.93 3651.95   1
   3  23   8 4969.12 2798.99   1
  -3 -23   8 6139.94 2262.29   1
   3 -23  -8 4546.07 3338.67   1
  -3  23  -8 2812.71 2093.53   1
  -3  23  -8 3263.20 2343.93   1
   3 -23   9 6229.13 2536.01   1
   3 -23   9 1530.07 2049.62   1
  -3  23   9 2253.14 2906.47   1
   3  23  -9 3482.73 1796.71   1
  -3 -23  -9  827.12 3130.57   1
  -3 -23  -9  783.90 1964.10   1
   3  23   9   47.70 3812.02   1
   3  23   9 1217.01 2680.08   1
  -3 -23   9 2082.55 1632.52   1
   3 -23  -9  652.64 3178.59   1
  -3  23  -9 2975.07 2021.04   1
  -3  23  -9  981.93 2405.67   1
   3 -23  10 1090.78 1761.95   1
   3 -23  10 1341.18 2063.57   1
  -3  23  10 1266.86 2849.30   1
   3  23 -10 1546.31 1536.01   1
  -3 -23 -10 2680.08 3914.93   1
  -3 -23 -10 1176.99 2269.61   1
   3  23  10 1289.50 4047.56   1
   3  23  10 2943.06 3007.09   1
  -3 -23  10 1753.94 1575.35   1
   3 -23 -10 -361.99 2728.10   1
  -3  23 -10 2241.94 2123.25   1
  -3  23 -10  247.88 2074.55   1
   3 -23  11 2469.70 1926.82  -1
  -3  23  11 6853.41 3576.49  -1
   3  23 -11 1023.10 1476.56  -1
  -3 -23 -11 6032.47 4516.35  -1
  -3 -23 -11 -206.17 2453.69  -1
   3  23  11 1690.83 3734.27  -1
   3  23  11 4054.42 3068.83  -1
  -3 -23  11 5193.23 2099.93  -1
   3 -23 -11 1261.38 2993.37  -1
  -3  23 -11 1685.11 1910.81  -1
  -3  23 -11 4918.82 2561.17  -1
   3 -23  12  332.49 1719.41   1
   3 -23  12 1099.47 2015.32   1
  -3  23  12  884.06 3183.17   1
   3  23 -12  493.02 1421.68   1
  -3 -23 -12 -1560.3 4129.88   1
  -3 -23 -12  324.49 2581.75   1
   3  23  12   48.36 3802.88   1
   3  23  12 1433.57 3169.45   1
  -3 -23  12 3711.41 1820.03   1
   3 -23 -12  958.84 2945.34   1
  -3  23 -12 1205.81 1785.27   1
  -3  23 -12 2110.45 2122.34   1
   3 -23  13 7550.87 2689.23   1
   3 -23  13 2401.10 2243.54   1
  -3  23  13 4825.06 3372.97   1
   3  23 -13 4852.50 1930.25   1
  -3 -23 -13 2526.87 5085.75   1
  -3 -23 -13 1604.62 2750.97   1
   3  23  13   17.29 4376.85   1
   3  23  13 1662.93 2867.59   1
  -3 -23  13 3809.74 1919.50   1
   3 -23 -13 1334.09 3254.06   1
  -3  23 -13 3622.22 2011.66   1
  -3  23 -13 2853.87 2538.30   1
   3  25   0  -42.24 2004.57   1
   3  25   0 1237.14 1972.56   1
  -3 -25   0  633.66 1625.20   1
  -3 -25   0  600.96 1337.75   1
   3 -25   0  158.52 1824.60   1
   3 -25   0 -1617.9 2364.51   1
  -3  25   0 -515.44 1801.96   1
  -3  25   0  689.91 2590.90   1
   3 -25   1  902.35 1834.89   1
   3 -25   1 1155.50 2641.20   1
  -3  25   1 1406.58 1863.02   1
  -3  25   1 1456.89 2476.56   1
   3  25  -1 2970.50 2142.23   1
   3  25  -1  605.30 1589.30   1
  -3 -25  -1 1137.66 1351.24   1
  -3 -25  -1 2112.28 2128.74   1
   3  25   1  122.68 2000.46   1
   3  25   1 1463.98 2149.09   1
  -3 -25   1 2401.10 1967.98   1
  -3 -25   1 1621.77 1450.03   1
   3 -25  -1 1178.14 1916.30   1
   3 -25  -1 1036.13 2721.24   1
  -3  25  -1  288.13 1789.39   1
  -3  25  -1  335.92 2405.67   1
   3 -25   2 1477.25 1879.49  -1
   3 -25   2 1710.04 2421.68  -1
  -3  25   2 -295.45 2028.35  -1
  -3  25   2  766.29 2366.79  -1
   3  25  -2  712.55 1755.54  -1
   3  25  -2 -601.42 1979.65  -1
  -3 -25  -2  934.14 1534.87  -1
  -3 -25  -2 1629.77 2467.41  -1
   3  25   2 1117.77 2552.02  -1
   3  25   2  385.09 2179.97  -1
  -3 -25   2  924.76 1575.35  -1
  -3 -25   2  248.11 1440.66  -1
   3 -25  -2  839.24 2109.30  -1
   3 -25  -2 2021.26 2471.98  -1
  -3  25  -2  518.18 1994.05  -1
  -3  25  -2 -140.25 2574.89  -1
   3 -25   3 1377.31 1897.32   1
   3 -25   3 2124.63 2641.20   1
  -3  25   3   -0.47 1982.62   1
  -3  25   3 1402.70 2437.68   1
   3  25  -3 1277.84 1776.35   1
   3  25  -3 2094.44 2300.48   1
  -3 -25  -3 1380.52 2689.23   1
  -3 -25  -3 2659.50 1768.58   1
   3  25   3 -445.23 2284.70   1
   3  25   3  349.19 2659.50   1
  -3 -25   3 4612.39 2281.73   1
  -3 -25   3  645.55 1509.26   1
   3 -25  -3  548.14 1896.64   1
   3 -25  -3  337.53 2396.52   1
  -3  25  -3  475.87 1783.44   1
  -3  25  -3 2661.79 2494.85   1
   3 -25   4 5714.61 2538.30   1
   3 -25   4 1920.42 2346.21   1
  -3  25   4 4406.58 2604.62   1
   3  25  -4 4045.27 2143.84   1
   3  25  -4 3185.45 2659.50   1
  -3 -25  -4 4145.89 2117.77   1
  -3 -25  -4 7541.73 3521.61   1
   3  25   4 2286.76 2881.31   1
   3  25   4 7056.93 2915.62   1
  -3 -25   4 9281.95 2961.35   1
  -3 -25   4 2339.35 1714.61   1
   3 -25  -4 2627.48 2279.90   1
   3 -25  -4 3013.95 2542.87   1
  -3  25  -4 5732.90 2536.01   1
  -3  25  -4 5977.58 2931.62   1
   3 -25   5  10569. 3437.00   1
   3 -25   5 -129.52 2522.29   1
  -3  25   5  750.51 2293.62   1
   3  25  -5  817.06 2627.48   1
   3  25  -5 1451.41 1777.27   1
  -3 -25  -5  876.06 1771.78   1
  -3 -25  -5 1642.12 2490.28   1
   3  25   5 -588.84 2718.95   1
   3  25   5  10364. 3635.94   1
  -3 -25   5 6990.62 2609.19   1
  -3 -25   5 1235.99 1671.85   1
   3 -25  -5 -100.43 2077.75   1
  -3  25  -5 4191.63 2213.58   1
  -3  25  -5 1750.28 2677.79   1
   4   0   0 409787.  96250.   1
   4   0   0 376629.  88566.   1
  -4   0   0 375028.  88086.   1
  -4   0   0 423965.  99611.   1
   4   0   1  31100. 7422.81   1
   4   0   1  25543. 6761.94   1
  -4   0   1  28630. 6855.70   1
  -4   0   1  26298. 6841.98   1
   4   0  -1  39652. 9435.16   1
   4   0  -1  23599. 6213.12   1
  -4   0  -1  20085. 4859.36   1
  -4   0  -1  35079. 8829.17   1
   4   0   2 6816.82 2897.32   1
  -4   0   2  15719. 3853.19   1
  -4   0   2 9769.03 3416.42   1
   4   0  -2  22380. 5453.92   1
   4   0  -2 5902.12 2794.42   1
  -4   0  -2  32129. 7692.65   1
  -4   0  -2 4223.64 2465.12   1
   4   0   3 8625.65 2269.61  -1
   4   0   3 6503.54 2721.24  -1
  -4   0   3 6771.09 1924.54  -1
  -4   0   3 5234.39 2529.15  -1
   4   0  -3 7281.04 2091.01  -1
   4   0  -3 2293.62 2148.87  -1
  -4   0  -3  10240. 2682.37  -1
  -4   0  -3 9430.59 3260.92  -1
   4   0   4  66064.  15662.   1
   4   0   4  64624.  15619.   1
  -4   0   4  46833.  11150.   1
  -4   0   4  39790. 9913.09   1
   4   0  -4  66979.  15964.   1
   4   0  -4  41505.  10295.   1
  -4   0  -4  54356.  12943.   1
  -4   0  -4  44638.  10938.   1
   4   0   5 9531.21 2620.62   1
   4   0   5 9732.44 3372.97   1
  -4   0   5 3377.54 1617.42   1
  -4   0   5 3770.86 2316.49   1
   4   0  -5  11537. 3361.53   1
   4   0  -5 5250.40 2668.65   1
  -4   0  -5  18694. 4820.48   1
  -4   0  -5  10489. 3469.01   1
   4   0   6  37320. 8993.82   1
   4   0   6  38326. 9519.77   1
  -4   0   6  54699.  13163.   1
  -4   0   6  27304. 7114.10   1
   4   0  -6  50332.  12314.   1
   4   0  -6  29934. 8163.72   1
  -4   0  -6  59524.  14290.   1
  -4   0  -6  36222. 9009.82   1
   4   0   7  33775. 8163.72   1
  -4   0   7  43448.  10556.   1
   4   0  -7  19060. 5360.16   1
  -4   0  -7  40041. 9810.19   1
  -4   0  -7  36794. 9117.30   1
   4   0   8 5995.88 1914.93   1
   4   0   8  24537. 6444.08   1
   4   0  -8  14381. 5716.89   1
  -4   0  -8 7964.78 2840.15   1
  -4   0  -8  23759. 6210.83   1
   4   0   9  31008. 7580.60   1
   4   0   9  39835. 9862.79   1
  -4   0  -9  46170.  11271.   1
  -4   0  -9  39012. 9672.98   1
   4   0  10 1987.19 2112.05   1
  -4   0 -10  259.78 1701.80   1
  -4   0 -10 1585.18 2135.60   1
   4   0  11 6460.09 2828.72   1
  -4   0 -11 7973.92 3260.92   1
   4   0  12  982.85 2311.91   1
  -4   0 -12 -536.24 1963.87   1
   4   0  13 4269.38 2705.23   1
  -4   0 -13 9208.77 3274.64   1
   4   0  14 1525.72 2483.42   1
  -4   0 -14  675.51 2195.29   1
   4   0  15  26412. 6983.76   1
  -4   0 -15  39698.  10000.   1
   4   0  16  11372. 3919.50   1
  -4   0 -16  14793. 4562.08   1
   4   0  17 1174.48 2510.86   1
  -4   0 -17 -814.09 2061.74   1
   4   0  18 2680.08 2513.15   1
  -4   0 -18 3864.62 2515.43   1
   4   0  19 8675.96 3393.55   1
  -4   0 -19 7928.19 3171.73   1
   4   0  20 4596.38 2927.05  -1
  -4   0 -20 5012.57 2707.52  -1
   4   0  21  16972. 5158.92   1
  -4   0 -21 7688.08 3400.41   1
   4   0  22 8838.32 3702.26   1
  -4   0 -22 5252.68 3034.53   1
   4   0  23 5225.24 3247.20   1
  -4   0 -23 4136.74 2748.68   1
   4   0  24 1788.47 2853.87   1
  -4   0 -24 6464.66 3199.17   1
   4   0  25 1214.95 2908.76   1
  -4   0 -25 4193.91 2993.37   1
   4   0  26 6487.53 3441.57   1
  -4   0 -26 2815.00 2641.20   1
   4   0  27  770.64 2901.90   1
  -4   0 -27 -1412.8 2828.72   1
   4   2   0  33958. 8056.25   1
   4   2   0  36954. 9208.77   1
  -4  -2   0  33798. 8017.37   1
  -4  -2   0  27464. 7006.62   1
   4  -2   0  38280. 9133.31   1
   4  -2   0  37228. 9359.70   1
  -4   2   0  27578. 6633.88   1
  -4   2   0  22200. 6032.47   1
   4  -2   1  89069.  21027.   1
   4  -2   1  51887.  12703.   1
  -4   2   1  54974.  13041.   1
  -4   2   1  67254.  16241.   1
   4   2  -1  41802.  10325.   1
   4   2  -1  58221.  13748.   1
  -4  -2  -1  68397.  16154.   1
  -4  -2  -1  59341.  14349.   1
   4   2   1  51086.  12451.   1
   4   2   1  58038.  13711.   1
  -4  -2   1  52207.  12335.   1
  -4  -2   1  54082.  13137.   1
   4  -2  -1  74320.  17594.   1
   4  -2  -1  80334.  19316.   1
  -4   2  -1  57009.  13512.   1
  -4   2  -1  47359.  11624.   1
   4  -2   2  18806. 4594.10   1
   4  -2   2  11226. 3711.41   1
  -4   2   2  10928. 2808.14   1
  -4   2   2 9867.36 3505.60   1
   4   2  -2  22605. 5424.19   1
   4   2  -2  12538. 3841.75   1
  -4  -2  -2  23919. 5783.21   1
  -4  -2  -2 6649.89 2579.46   1
   4   2   2 6816.82 2824.15   1
   4   2   2  14306. 3567.34   1
  -4  -2   2  29819. 7537.15   1
  -4  -2   2  10373. 2561.17   1
   4  -2  -2  22749. 5593.41   1
   4  -2  -2 8472.44 3222.04   1
  -4   2  -2  10883. 3617.65   1
   4  -2   3  52344.  12422.   1
   4  -2   3  80448.  19303.   1
  -4   2   3  65424.  15513.   1
  -4   2   3  45712.  11310.   1
   4   2  -3  89824.  21207.   1
   4   2  -3  67368.  16243.   1
  -4  -2  -3  74571.  17704.   1
  -4  -2  -3  59776.  14445.   1
   4   2   3  57924.  14009.   1
   4   2   3  63092.  14946.   1
  -4  -2   3  66430.  15701.   1
  -4  -2   3  63023.  15218.   1
   4  -2  -3  67962.  16142.   1
   4  -2  -3  58747.  14329.   1
  -4   2  -3  66064.  15660.   1
  -4   2  -3  62131.  14983.   1
   4  -2   4  25223. 6096.50   1
   4  -2   4  25314. 6697.91   1
  -4   2   4  23256. 5714.61   1
  -4   2   4  52824.  12872.   1
   4   2  -4  42739.  10542.   1
   4   2  -4  20645. 5131.48   1
  -4  -2  -4  32060. 7816.14   1
  -4  -2  -4  31283. 7823.00   1
   4   2   4  23782. 6233.70   1
   4   2   4  16927. 4216.78   1
  -4  -2   4  24148. 5886.11   1
  -4  -2   4  22623. 5938.71   1
   4  -2  -4  21678. 5547.67   1
   4  -2  -4  28836. 7457.12   1
  -4   2  -4  27921. 6777.95   1
  -4   2  -4  26343. 6777.95   1
   4  -2   5 5970.72 1775.67   1
   4  -2   5 6965.46 2881.31   1
  -4   2   5  14052. 3615.36   1
  -4   2   5 4438.60 2684.65   1
   4   2  -5 7498.28 2993.37   1
   4   2  -5 4628.40 3045.96   1
  -4  -2  -5 3583.35 1768.12   1
  -4  -2  -5 8797.16 3077.98   1
   4   2   5  20089. 5421.90   1
  -4  -2   5 8650.80 2586.32   1
  -4  -2   5 6386.91 2753.26   1
   4  -2  -5  14493. 3999.54   1
   4  -2  -5 3711.41 2501.71   1
  -4   2  -5 4953.12 1736.33   1
  -4   2  -5  13195. 3935.51   1
   4  -2   6  40979. 9835.34   1
   4  -2   6  46970.  11555.   1
  -4   2   6  43174.  10464.   1
  -4   2   6  45369.  11230.   1
   4   2  -6  25223. 7029.49   1
   4   2  -6  31969. 8129.42   1
  -4  -2  -6  34073. 8509.02   1
   4   2   6  42282.  10375.   1
  -4  -2   6  32792. 8323.80   1
   4  -2  -6  63229.  15280.   1
   4  -2  -6  74320.  17960.   1
  -4   2  -6  35033. 8515.88   1
   4  -2   7  20585. 5156.64   1
   4  -2   7 9977.12 3475.87   1
  -4   2   7  18845. 5026.29   1
   4   2  -7  11617. 3759.43   1
  -4  -2  -7  18061. 4875.37   1
   4   2   7  35490. 8856.61   1
   4  -2  -7  14418. 5337.29   1
  -4   2  -7  15385. 4228.21   1
   4  -2   8  49485.  11884.   1
   4  -2   8  51612.  12627.   1
  -4   2   8  39904. 9814.76   1
  -4  -2  -8  79328.  18978.   1
   4   2   8  82781.  19799.   1
   4  -2  -8  36154.  10201.   1
  -4   2  -8  50309.  12234.   1
   4  -2   9  22227. 5593.41   1
   4  -2   9 9215.63 3240.34   1
  -4   2   9 3770.86 2115.25   1
  -4  -2  -9 4959.98 2437.68   1
   4   2   9 3375.25 2164.64   1
   4  -2  -9 1769.04 4445.46   1
  -4   2  -9 7871.02 2933.91   1
  -4   2  -9 -259.09 1699.98   1
   4  -2  10  21919. 5536.24   1
   4  -2  10  28516. 7326.77   1
  -4  -2 -10  18102. 4964.55   1
   4   2  10 9599.81 3235.76   1
   4  -2 -10 2597.76 4452.32   1
  -4   2 -10  21582. 5801.50   1
   4  -2  11  12291. 3416.42   1
   4  -2  11  14404. 4342.55   1
  -4  -2 -11 8755.99 3297.50   1
   4   2  11  16417. 4674.13   1
  -4   2 -11 9243.07 3379.83   1
   4  -2  12 8531.89 2650.35   1
   4  -2  12 6960.89 3050.53   1
  -4  -2 -12 9153.89 3123.71   1
   4   2  12 8316.94 3212.89   1
  -4   2 -12 6270.29 2776.12   1
  -4   2 -12  723.99 1886.80   1
   4  -2  13 2510.86 1493.25   1
   4  -2  13 1755.54 2497.14   1
  -4  -2 -13 4674.13 2476.56   1
   4   2  13 5193.23 2810.43   1
  -4   2 -13 4900.52 2549.73   1
  -4   2 -13  323.12 1776.81   1
   4  -2  14  15991. 4825.06   1
  -4  -2 -14 5399.03 2668.65   1
   4   2  14 6530.98 3023.09   1
  -4   2 -14 3011.66 2191.86   1
  -4   2 -14 -826.89 1869.20   1
   4  -2  15  13860. 4386.00   1
  -4  -2 -15  16373. 4841.07   1
   4   2  15  16689. 4886.80   1
   4  -2  16  20807. 5858.67   1
  -4  -2 -16  13936. 4351.70   1
   4   2  16  13791. 4278.52   1
   4  -2  17 4909.67 2933.91   1
  -4  -2 -17 4353.99 2508.57   1
   4   2  17 2224.33 2451.40   1
  -4   2 -17 -239.19 1909.90   1
   4  -2  18 3473.58 2554.31   1
  -4  -2 -18 8513.60 3158.01   1
   4   2  18 7447.97 3130.57   1
  -4   2 -18  10188. 3404.98   1
   4  -2  19  20967. 5783.21   1
  -4  -2 -19 9231.64 3393.55   1
   4   2  19 6368.62 2947.63   1
  -4   2 -19  21779. 5854.10   1
   4  -2  20 8328.37 3507.89   1
  -4  -2 -20  11015. 3720.55   1
   4   2  20  14061. 4520.92   1
  -4   2 -20 7662.92 3045.96   1
   4  -2  21  20377. 5838.09   1
  -4  -2 -21  11066. 3976.67   1
   4   2  21  18532. 5460.78   1
  -4   2 -21  12518. 4232.79   1
   4  -2  22  13753. 4591.81   1
  -4  -2 -22  14311. 4573.52   1
   4   2  22  11027. 4129.88   1
  -4   2 -22  14045. 4516.35   1
   4  -2  23 5728.33 3304.36   1
  -4  -2 -23 8817.74 3446.14   1
   4   2  23 6304.59 3393.55   1
  -4   2 -23 5332.72 2892.75   1
   4  -2  24  24766. 6796.24   1
  -4  -2 -24  22211. 6318.31   1
   4   2  24  23233. 6473.81   1
  -4   2 -24  16611. 5074.31   1
   4  -2  25 8504.45 3720.55   1
  -4  -2 -25 6551.56 3318.09   1
   4   2  25 6645.32 3494.17   1
  -4   2 -25 4495.77 3011.66   1
   4  -2  26 8545.61 3658.81   1
  -4  -2 -26 7925.90 3496.45   1
   4   2  26 7713.23 3654.24   1
  -4   2 -26 5488.22 3475.87   1
   4  -2  27 5479.07 3192.31   1
  -4  -2 -27 4886.80 3361.53   1
   4   2  27 2865.31 3057.39   1
  -4   2 -27 7489.13 3677.11   1
   4   4   0  63709.  15072.   1
   4   4   0  41230.  10178.   1
  -4  -4   0  63755.  15081.   1
  -4  -4   0  48868.  11914.   1
   4  -4   0  36748. 8826.88   1
   4  -4   0  44889.  11070.   1
  -4   4   0  54059.  12854.   1
  -4   4   0  48159.  11823.   1
   4  -4   1  10892. 2837.87   1
   4  -4   1  11944. 3949.23   1
  -4   4   1  15310. 3844.04   1
   4   4  -1  14343. 3439.28   1
   4   4  -1  14288. 4173.33   1
  -4  -4  -1  11720. 3624.51   1
  -4  -4  -1 7505.14 2062.43   1
   4   4   1  12957. 3898.92   1
  -4  -4   1  15753. 3770.86   1
  -4  -4   1  34004. 8456.43   1
   4  -4  -1  17443. 4406.58   1
  -4   4  -1  11999. 3093.98   1
  -4   4  -1  16234. 4754.17   1
   4  -4   2  18150. 4484.33   1
   4  -4   2  12618. 4171.05   1
  -4   4   2  13926. 3542.19   1
  -4   4   2  26023. 6777.95   1
   4   4  -2  32609. 8188.88   1
   4   4  -2  21770. 5190.94   1
  -4  -4  -2  18299. 4893.66   1
   4   4   2  13051. 3871.48   1
  -4  -4   2  19957. 4767.89   1
  -4  -4   2  29156. 7429.67   1
   4  -4  -2  17734. 4502.63   1
   4  -4  -2  10434. 3722.84   1
  -4   4  -2  16323. 4075.00   1
  -4   4  -2  14832. 4459.18   1
   4  -4   3  45872.  10935.   1
   4  -4   3  44752.  11063.   1
  -4   4   3  53236.  12692.   1
  -4   4   3  59707.  14461.   1
   4   4  -3  60919.  14468.   1
   4   4  -3  51864.  12627.   1
  -4  -4  -3  36680. 9092.15   1
   4   4   3  59341.  14324.   1
  -4  -4   3  46398.  11324.   1
  -4  -4   3  72101.  17116.   1
   4  -4  -3  44249.  10643.   1
   4  -4  -3  34850. 8822.31   1
  -4   4  -3  47427.  11315.   1
  -4   4  -3  55751.  13535.   1
   4  -4   4  32403. 7800.13   1
   4  -4   4  41710.  10348.   1
  -4   4   4  37068. 8957.23   1
  -4   4   4  29179. 7514.29   1
   4   4  -4  29865. 7601.18   1
   4   4  -4  18132. 4857.07   1
  -4  -4  -4  32655. 8120.28   1
   4   4   4  31260. 7852.73   1
  -4  -4   4  35811. 8948.08   1
   4  -4  -4  40384. 9835.34   1
   4  -4  -4  32746. 8417.55   1
  -4   4  -4  31031. 7518.86   1
  -4   4  -4  21477. 5819.80   1
   4  -4   5 6053.05 1831.92   1
   4  -4   5 7141.54 2847.01   1
  -4   4   5 4838.78 1721.47   1
  -4   4   5  954.04 2098.56   1
   4   4  -5  21104. 5664.30   1
  -4  -4  -5 3215.18 2106.33   1
   4   4   5 2536.01 2112.28   1
  -4  -4   5 6983.76 2771.55   1
   4  -4  -5  610.56 1906.93   1
   4  -4  -5 5355.59 3016.23   1
  -4   4  -5 9590.66 2691.51   1
  -4   4  -5 6030.18 2698.37   1
   4  -4   6 8570.77 2382.80   1
   4  -4   6 8701.11 3208.32   1
  -4   4   6  14006. 3695.40   1
  -4   4   6 -1005.3 1956.78   1
   4   4  -6  11717. 3768.58   1
  -4  -4  -6 9798.76 3155.73   1
   4   4   6 6107.93 2476.56   1
  -4  -4   6  10071. 3402.70   1
   4  -4  -6  15186. 4312.82   1
   4  -4  -6 7484.56 3231.19   1
  -4   4  -6 6857.99 2183.17   1
  -4   4  -6 7134.68 2709.81   1
   4  -4   7 4006.40 1510.40   1
   4  -4   7 4269.38 2568.03   1
  -4   4   7 2890.46 1846.56   1
   4   4  -7  10050. 3487.31   1
  -4  -4  -7  13919. 3917.22   1
   4   4   7 5902.12 2574.89   1
  -4  -4   7 7077.51 2538.30   1
   4  -4  -7 3201.46 2750.97   1
   4  -4  -7 7162.12 2789.84   1
  -4   4  -7 7102.67 2254.06   1
  -4   4  -7 5865.53 2629.77   1
   4  -4   8  42922.  10334.   1
   4  -4   8  29088. 7482.27   1
  -4   4   8  37709. 9414.58   1
  -4  -4  -8  43517.  10643.   1
   4   4   8  49257.  12003.   1
   4  -4  -8  22408. 6828.26   1
  -4   4  -8  25932. 6498.96   1
  -4   4  -8  29453. 7546.30   1
   4  -4   9  11246. 3162.59   1
   4  -4   9 8515.88 3137.43   1
  -4   4   9 2851.59 2291.33   1
  -4  -4  -9 2730.39 2169.45   1
   4   4   9 2698.37 2050.54   1
   4  -4  -9 1741.37 4424.88   1
  -4   4  -9 3912.64 2092.38   1
  -4   4  -9  10309. 3471.30   1
   4  -4  10  28127. 7004.34  -1
   4  -4  10  11660. 3773.15  -1
  -4   4  10  12627. 4052.13  -1
  -4  -4 -10  26138. 6816.82  -1
   4   4  10  28630. 7310.76  -1
   4  -4 -10 5977.58 5202.37  -1
  -4   4 -10  14212. 4155.04  -1
  -4   4 -10  26778. 6951.74  -1
   4  -4  11  12986. 3631.37   1
   4  -4  11  19190. 5323.57   1
  -4   4  11 4676.42 2563.46   1
  -4  -4 -11 6336.60 2568.03   1
   4   4  11  15207. 4454.60   1
   4  -4 -11 3517.03 5051.45   1
  -4   4 -11  16755. 4751.88   1
  -4   4 -11  11086. 3674.82   1
   4  -4  12  16096. 4292.24   1
   4  -4  12 7713.23 3219.75   1
  -4  -4 -12  13730. 4042.99   1
   4   4  12 8042.53 3203.75   1
   4  -4 -12 4738.16 4701.57   1
  -4   4 -12 2755.54 2385.09   1
  -4   4 -12 6027.89 2874.45   1
   4  -4  13  45644.  11088.   1
   4  -4  13  59067.  14413.   1
  -4  -4 -13  59318.  14365.   1
   4   4  13  62726.  15246.   1
  -4   4 -13  42785.  10643.   1
  -4   4 -13  56803.  13826.   1
   4  -4  14  19213. 5076.60   1
   4  -4  14  12863. 4246.51   1
  -4  -4 -14  20357. 5545.39   1
   4   4  14  11072. 3841.75   1
  -4   4 -14  17615. 5056.02   1
  -4   4 -14  11562. 3953.80   1
   4  -4  15 7345.07 2577.18   1
   4  -4  15  12223. 4061.28   1
  -4  -4 -15  12593. 4006.40   1
   4   4  15  13442. 4246.51   1
  -4   4 -15 7189.57 3075.69   1
  -4   4 -15  12621. 4198.49   1
   4  -4  16 3558.19 1885.89   1
   4  -4  16 4975.98 2984.22   1
  -4  -4 -16 5353.30 2696.09   1
   4   4  16 8278.06 3029.95   1
  -4   4 -16 6185.68 2876.74   1
  -4   4 -16 6677.33 3041.39   1
   4  -4  17  21095. 5444.77   1
   4  -4  17  44249.  11063.   1
  -4  -4 -17  32426. 8241.47   1
   4   4  17  33547. 8511.31   1
  -4   4 -17  24240. 6414.35   1
  -4   4 -17  36199. 9073.85   1
   4  -4  18 4152.75 2700.66   1
  -4  -4 -18 3494.17 2337.07   1
   4   4  18 2237.36 2428.54   1
  -4   4 -18 2021.26 2180.65   1
  -4   4 -18 3679.39 2542.87   1
   4  -4  19 1265.72 2453.69   1
  -4  -4 -19 3130.57 2558.88   1
   4   4  19 1343.01 2201.23   1
  -4   4 -19 1294.76 2359.93   1
   4  -4  20  12980. 4472.90   1
  -4  -4 -20 9780.46 3567.34   1
   4   4  20 8218.61 3581.06   1
  -4   4 -20  10290. 3704.55   1
   4  -4  21  32586. 8504.45   1
  -4  -4 -21  36131. 9254.51   1
   4   4  21  48068.  11930.   1
  -4   4 -21  32678. 8458.72   1
   4  -4  22 2008.23 2890.46   1
  -4  -4 -22 2936.20 2748.68   1
   4   4  22 2734.96 3059.68   1
  -4   4 -22 4550.65 2943.06   1
   4  -4  23  14445. 4731.30   1
  -4  -4 -23  13711. 4516.35   1
   4   4  23  16819. 5046.87   1
  -4   4 -23  14080. 4349.41   1
   4  -4  24 4637.54 2904.18   1
  -4  -4 -24 5581.98 3290.64   1
   4   4  24 4914.24 3180.88   1
  -4   4 -24 3972.10 2853.87   1
   4  -4  25 2190.03 2961.35   1
  -4  -4 -25 2040.70 2853.87   1
   4   4  25 5083.46 3247.20   1
  -4   4 -25 4642.12 2963.64   1
   4  -4  26 4205.35 3080.26   1
  -4  -4 -26 5206.95 3164.87   1
   4   4  26 5533.95 3375.25   1
  -4   4 -26 2757.83 3185.45   1
   4  -4  27 6057.62 3338.67   1
  -4  -4 -27 3052.82 3185.45   1
   4   4  27 5812.94 3446.14   1
  -4   4 -27 5275.55 3434.71   1
   4   6   0 8479.30 3228.90   1
  -4  -6   0 6167.39 2638.92   1
   4  -6   0 6910.58 2163.04   1
   4  -6   0 7457.12 3320.37   1
  -4   6   0 8609.64 2460.55   1
  -4   6   0 6976.90 3160.30   1
   4  -6   1  17683. 4434.02   1
   4  -6   1  18809. 5335.01   1
  -4   6   1  12810. 3400.41   1
  -4   6   1  14660. 4507.20   1
   4   6  -1  22534. 5931.85   1
  -4  -6  -1  25406. 6588.15   1
   4   6   1  19506. 5275.55   1
  -4  -6   1  15392. 4438.60   1
   4  -6  -1  13606. 3649.67   1
   4  -6  -1  11466. 3937.80   1
  -4   6  -1  13755. 3560.48   1
  -4   6  -1  11464. 3992.68   1
   4  -6   2  27395. 6654.46   1
   4  -6   2  31489. 8092.83   1
  -4   6   2  27944. 6871.71   1
  -4   6   2  20320. 5787.78   1
   4   6  -2  39515. 9828.48   1
  -4  -6  -2  20101. 5328.15   1
   4   6   2  30894. 7726.95   1
  -4  -6   2  18891. 5124.62   1
   4  -6  -2  24400. 6128.51   1
   4  -6  -2  22570. 6187.97   1
  -4   6  -2  52184.  12456.   1
  -4   6  -2  31283. 8010.51   1
   4  -6   3  30300. 7324.48   1
   4  -6   3  10263. 3597.07   1
  -4   6   3 9766.74 2785.27   1
  -4   6   3  15952. 4886.80   1
   4   6  -3  13348. 4191.63   1
  -4  -6  -3  12449. 3663.39   1
   4   6   3 6235.99 2570.32   1
   4  -6  -3  15397. 4136.74   1
   4  -6  -3  15566. 4850.21   1
  -4   6  -3  15324. 3914.93   1
  -4   6  -3  22481. 6050.76   1
   4  -6   4  14404. 3670.25   1
   4  -6   4  13208. 3990.39   1
  -4   6   4  11205. 3160.30   1
  -4   6   4  31489. 8124.85   1
   4   6  -4  42282.  10471.   1
  -4  -6  -4  13300. 3823.46   1
   4   6   4  16533. 4520.92   1
  -4  -6   4  20046. 5415.04   1
   4  -6  -4  19394. 5104.04   1
   4  -6  -4  16815. 5072.03   1
  -4   6  -4 9885.65 2682.37   1
  -4   6  -4  21701. 5833.52   1
   4  -6   5  35010. 8445.00   1
   4  -6   5  44157.  10876.   1
  -4   6   5  38349. 9373.42   1
  -4   6   5  25566. 6848.84   1
   4   6  -5  42739.  10588.   1
  -4  -6  -5  43929.  10718.   1
   4   6   5  43105.  10544.   1
  -4  -6   5  37434. 9339.12   1
   4  -6  -5  40567.  10055.   1
   4  -6  -5  32975. 8481.58   1
  -4   6  -5  69403.  16492.   1
  -4   6  -5  36451. 9062.42   1
   4  -6   6 5248.11 1748.45   1
   4  -6   6  11361. 3677.11   1
  -4   6   6 6503.54 2278.53   1
  -4   6   6 6407.49 3240.34   1
   4   6  -6 7178.13 2938.48   1
  -4  -6  -6 5049.16 2323.35   1
   4   6   6 9112.73 2995.65   1
  -4  -6   6  22262. 5938.71   1
   4  -6  -6 9140.17 3247.20   1
   4  -6  -6 5437.91 2979.65   1
  -4   6  -6  17953. 4591.81   1
  -4   6  -6 8152.29 2943.06   1
   4  -6   7  38898. 9387.14   1
   4  -6   7  34965. 8810.88   1
  -4   6   7  14688. 4038.41   1
   4   6  -7  15488. 4578.09   1
  -4  -6  -7  25131. 6391.49   1
  -4  -6   7  17798. 4969.12   1
   4  -6  -7  17914. 5072.03   1
   4  -6  -7  25955. 6931.16   1
  -4   6  -7  22179. 5607.13   1
  -4   6  -7  19389. 5300.70   1
   4  -6   8  33181. 8081.40   1
   4  -6   8  43608.  10748.   1
  -4   6   8  57420.  13945.   1
  -4  -6  -8  54585.  13201.   1
   4   6   8  29385. 7445.68   1
   4  -6  -8  45987.  11534.   1
  -4   6  -8  72056.  17208.   1
  -4   6  -8  47267.  11605.   1
   4  -6   9  18946. 4820.48  -1
   4  -6   9  26801. 6954.03  -1
  -4   6   9  20814. 5771.78  -1
  -4  -6  -9  24080. 6249.71  -1
   4   6   9  13268. 3956.09  -1
   4  -6  -9  14118. 5270.98  -1
  -4   6  -9  12964. 3642.80  -1
  -4   6  -9  21848. 5895.26  -1
   4  -6  10 6366.33 2097.41   1
   4  -6  10  16769. 4786.18   1
  -4   6  10 5579.69 3011.66   1
  -4  -6 -10 5755.77 2817.29   1
   4   6  10 8417.55 3089.41   1
   4  -6 -10  769.95 4493.48   1
  -4   6 -10 8104.27 2686.94   1
  -4   6 -10 2965.92 2437.68   1
   4  -6  11 4267.09 1985.82   1
   4  -6  11 4168.76 2540.59   1
  -4   6  11 5177.22 3039.10   1
  -4  -6 -11 8003.65 2927.05   1
   4   6  11 3247.20 2382.80   1
   4  -6 -11  294.76 4852.50   1
  -4   6 -11 3535.33 2021.49   1
  -4   6 -11 6606.44 2908.76   1
   4  -6  12  22257. 5707.75   1
   4  -6  12 9903.95 3610.79   1
  -4   6  12  16067. 5097.18   1
  -4  -6 -12  26915. 6960.89   1
   4   6  12  22113. 5982.16   1
   4  -6 -12 6192.54 5497.36   1
  -4   6 -12  30162. 7726.95   1
  -4   6 -12  21189. 5815.22   1
   4  -6  13  24034. 6146.80   1
   4  -6  13 8458.72 3453.00   1
  -4   6  13 6620.16 3544.47   1
  -4  -6 -13 7306.19 2984.22   1
   4   6  13 9725.58 3512.46   1
   4  -6 -13 1584.49 5280.12   1
  -4   6 -13  12856. 4024.69   1
  -4   6 -13 7985.36 3322.66   1
   4  -6  14 7246.73 2613.76   1
   4  -6  14 6837.40 3135.14   1
  -4  -6 -14 8111.13 3041.39   1
   4   6  14  10745. 3722.84   1
   4  -6 -14 3560.48 5241.25   1
  -4   6 -14 5312.14 2677.79   1
  -4   6 -14 8504.45 3400.41   1
   4  -6  15  19527. 5170.36   1
   4  -6  15  18939. 5323.57   1
  -4  -6 -15 6505.83 2750.97   1
   4   6  15 9249.93 3347.81   1
  -4   6 -15  15232. 4557.51   1
  -4   6 -15  13659. 4324.26   1
   4  -6  16 1978.96 1774.75   1
   4  -6  16 2100.84 2584.04   1
  -4  -6 -16 2782.98 2350.79   1
   4   6  16 4774.75 2542.87   1
  -4   6 -16 3091.70 2334.78   1
  -4   6 -16 7036.35 3018.52   1
   4  -6  17 8159.15 2883.60   1
   4  -6  17 7077.51 3276.92   1
  -4  -6 -17  15449. 4500.34   1
   4   6  17  10139. 3450.72   1
  -4   6 -17 6713.92 3093.98   1
  -4   6 -17 8248.33 3098.56   1
   4  -6  18 6579.00 2513.15   1
   4  -6  18 3382.11 2737.25   1
  -4  -6 -18 3997.25 2353.07   1
   4   6  18 3953.80 2698.37   1
  -4   6 -18 2963.64 2579.46   1
  -4   6 -18 2794.42 2522.29   1
   4  -6  19  11340. 3546.76   1
   4  -6  19  10798. 4042.99   1
  -4  -6 -19  11978. 4015.55   1
   4   6  19  13700. 4324.26   1
  -4   6 -19  10114. 3862.33   1
  -4   6 -19  13853. 4431.74   1
   4  -6  20 4319.68 2366.79   1
   4  -6  20 6629.31 3487.31   1
  -4  -6 -20 4857.07 3071.12   1
   4   6  20 8287.21 3658.81   1
  -4   6 -20 1862.56 2698.37   1
  -4   6 -20 7281.04 3217.47   1
   4  -6  21 3768.58 2121.20   1
   4  -6  21 4047.56 3016.23   1
  -4  -6 -21 9526.63 3674.82   1
   4   6  21  10069. 3903.49   1
  -4   6 -21 5995.88 3178.59   1
  -4   6 -21 4289.96 2906.47   1
   4  -6  22  26847. 7303.90   1
  -4  -6 -22  32472. 8511.31   1
   4   6  22  34804. 9039.55   1
  -4   6 -22  19184. 5787.78   1
  -4   6 -22  34164. 8792.58   1
   4  -6  23 5010.29 3196.89   1
  -4  -6 -23 6938.02 3430.14   1
   4   6  23 7246.73 3258.63   1
  -4   6 -23  747.08 2262.06   1
  -4   6 -23 8538.75 3432.42   1
   4  -6  24  21983. 6174.25   1
  -4  -6 -24  25337. 6990.62   1
   4   6  24  24034. 6707.06   1
  -4   6 -24  28859. 7692.65   1
   4  -6  25 2476.56 3057.39   1
  -4  -6 -25 5593.41 3313.51   1
   4   6  25  754.17 2917.90   1
  -4   6 -25  405.44 2673.22   1
   4  -6  26 5954.72 3601.64   1
  -4  -6 -26 7589.75 4047.56   1
   4   6  26 7029.49 3594.78   1
  -4   6 -26 4685.57 3082.55   1
   4   8   0  11994. 3720.55   1
  -4  -8   0 5616.28 1856.85   1
  -4  -8   0 3386.69 2373.65   1
   4  -8   0 8840.60 2691.51   1
   4  -8   0 4479.76 2794.42   1
  -4   8   0 5392.17 1959.75   1
  -4   8   0 7438.82 3400.41   1
   4  -8   1  12479. 4097.87   1
  -4   8   1 6633.88 2220.90   1
  -4   8   1 2494.85 2792.13   1
   4   8  -1 2869.88 1858.22   1
   4   8  -1 2478.85 2451.40   1
  -4  -8  -1 2574.89 2159.39   1
   4   8   1 2350.79 2094.44   1
  -4  -8   1 6796.24 1808.14   1
  -4  -8   1 9229.35 3206.03   1
   4  -8  -1  10357. 3052.82   1
   4  -8  -1 6263.43 3167.16   1
   4  -8   2 8831.46 2508.57   1
  -4   8   2  10885. 3082.55   1
  -4   8   2 3411.84 2702.95   1
   4   8  -2 5437.91 1557.97   1
   4   8  -2  11960. 3773.15   1
  -4  -8  -2  11820. 3560.48   1
   4   8   2 7845.87 2744.11   1
  -4  -8   2 5485.93 1433.57   1
  -4  -8   2 6432.65 2734.96   1
   4  -8  -2 7310.76 2510.86   1
   4  -8  -2 2268.69 2732.68   1
  -4   8  -2 6306.88 2061.51   1
  -4   8  -2  28081. 7367.93   1
   4  -8   3  26321. 6460.09   1
   4  -8   3  23073. 6151.38   1
  -4   8   3  25932. 6498.96   1
  -4   8   3  26412. 7059.22   1
   4   8  -3  20867. 5698.60   1
   4   8  -3  26732. 6364.05   1
  -4  -8  -3  14763. 4104.73   1
   4   8   3  14169. 4054.42   1
  -4  -8   3  27578. 6551.56   1
  -4  -8   3  27876. 7219.29   1
   4  -8  -3  19851. 5188.65   1
   4  -8  -3  35445. 9060.13   1
  -4   8  -3  46307.  11127.   1
  -4   8  -3  25246. 6741.36   1
   4  -8   4  53281.  12737.   1
   4  -8   4  37869. 9474.04   1
  -4   8   4  37892. 9293.38   1
  -4   8   4  24354. 6711.63   1
   4   8  -4  31809. 7539.44   1
   4   8  -4  26275. 6960.89   1
  -4  -8  -4  20254. 5330.43   1
   4   8   4  27052. 6860.27   1
  -4  -8   4  29911. 7111.82   1
  -4  -8   4  29614. 7598.90   1
   4  -8  -4  33592. 8346.67   1
   4  -8  -4  35170. 8996.10   1
  -4   8  -4  37503. 9085.29   1
  -4   8  -4  23142. 6119.36   1
   4  -8   5  57855.  13821.  -1
   4  -8   5  47061.  11585.  -1
  -4   8   5  48159.  11694.  -1
  -4   8   5  42191.  10654.  -1
   4   8  -5  50514.  12387.  -1
   4   8  -5  46581.  11020.  -1
  -4  -8  -5  62566.  15026.  -1
   4   8   5  52870.  12810.  -1
  -4  -8   5  54676.  13309.  -1
  -4  -8   5  54356.  12906.  -1
   4  -8  -5  40819.  10325.  -1
   4  -8  -5  57535.  13938.  -1
  -4   8  -5  58793.  14064.  -1
  -4   8  -5  61948.  14960.  -1
   4  -8   6  12204. 3308.94   1
   4  -8   6  22648. 6080.49   1
  -4   8   6  18111. 4790.76   1
  -4   8   6  11004. 4006.40   1
   4   8  -6  31900. 7605.76   1
   4   8  -6  10437. 3645.09   1
  -4  -8  -6  19794. 5261.83   1
   4   8   6  16627. 4594.10   1
  -4  -8   6  11496. 2947.63   1
  -4  -8   6  25314. 6574.43   1
   4  -8  -6  20896. 5641.43   1
   4  -8  -6  15534. 4895.95   1
  -4   8  -6  10377. 2988.79   1
  -4   8  -6  17848. 4994.28   1
   4  -8   7  68786.  16389.   1
   4  -8   7  78710.  18893.   1
  -4   8   7  47999.  11653.   1
   4   8  -7  58312.  14180.   1
   4   8  -7  44272.  10510.   1
  -4  -8  -7  52687.  12737.   1
   4   8   7  53419.  12982.   1
  -4  -8   7  41756.  10359.   1
   4  -8  -7 108552.  25886.   1
  -4   8  -7  59982.  14404.   1
  -4   8  -7  51818.  12664.   1
   4  -8   8  37663. 9151.60  -1
   4  -8   8  40293.  10103.  -1
  -4   8   8  34004. 8477.01  -1
  -4  -8  -8  41345.  10165.  -1
   4   8   8  42374.  10462.  -1
   4  -8  -8  34210. 8703.40  -1
  -4   8  -8  56163.  13533.  -1
  -4   8  -8  47404.  11656.  -1
   4  -8   9 5508.80 1998.17   1
   4  -8   9  22230. 5963.86   1
  -4   8   9 2339.35 2246.28   1
  -4  -8  -9  15381. 4379.14   1
   4   8   9  17311. 4877.65   1
   4  -8  -9  671.62 2638.92   1
  -4   8  -9 3201.46 1860.05   1
  -4   8  -9  12627. 3999.54   1
   4  -8  10 9890.23 2821.86  -1
   4  -8  10  10240. 3597.07  -1
  -4   8  10 8865.76 3642.80  -1
  -4  -8 -10 5682.59 2487.99  -1
   4   8  10 7644.63 3096.27  -1
   4  -8 -10 8161.44 4477.47  -1
  -4   8 -10 9105.87 2824.15  -1
  -4   8 -10 7816.14 3164.87  -1
   4  -8  11 5472.21 2042.53   1
   4  -8  11 3304.36 2638.92   1
  -4   8  11 2524.58 3242.62   1
  -4  -8 -11 6089.63 2773.84   1
   4   8  11 5849.53 2879.03   1
   4  -8 -11 1835.58 4877.65   1
  -4   8 -11 6851.13 2474.27   1
  -4   8 -11 3672.53 2691.51   1
   4  -8  12 9906.23 2975.07   1
   4  -8  12  13933. 4424.88   1
  -4   8  12  17100. 5675.73   1
  -4  -8 -12  15134. 4477.47   1
   4   8  12  13281. 4123.02   1
   4  -8 -12 2198.26 5597.98   1
  -4   8 -12  14420. 4036.13   1
  -4   8 -12  14919. 4603.24   1
   4  -8  13 4607.82 2069.06  -1
   4  -8  13  12017. 4077.29  -1
  -4   8  13 9602.09 4205.35  -1
  -4  -8 -13 4424.88 2465.12  -1
   4   8  13  22506. 6000.45  -1
   4  -8 -13 1238.97 5312.14  -1
  -4   8 -13 3425.56 1931.17  -1
  -4   8 -13 8072.25 3388.97  -1
   4  -8  14  25109. 6423.50   1
   4  -8  14  18863. 5369.31   1
  -4   8  14  14221. 4703.86   1
  -4  -8 -14  24971. 6464.66   1
   4   8  14  19513. 5362.45   1
   4  -8 -14 8374.11 5671.16   1
  -4   8 -14  20944. 5650.58   1
  -4   8 -14  19380. 5442.48   1
   4  -8  15 6382.34 2483.42  -1
   4  -8  15 5291.56 2764.69  -1
  -4   8  15 1215.41 2860.73  -1
  -4  -8 -15 3665.67 2501.71  -1
   4   8  15 6245.13 2819.57  -1
   4  -8 -15  517.49 4774.75  -1
  -4   8 -15 6871.71 3011.66  -1
  -4   8 -15 4790.76 2780.70  -1
   4  -8  16  16238. 4502.63   1
   4  -8  16 5838.09 2977.36   1
  -4  -8 -16  11763. 3681.68   1
   4   8  16 7644.63 3059.68   1
   4  -8 -16  987.42 5017.15   1
  -4   8 -16  15815. 4669.56   1
  -4   8 -16  10892. 3748.00   1
   4  -8  17  15493. 4434.02   1
   4  -8  17 7704.09 3530.75   1
  -4  -8 -17 9542.64 3308.94   1
   4   8  17  17151. 4804.48   1
  -4   8 -17  15305. 4719.87   1
  -4   8 -17  12625. 4022.41   1
   4  -8  18  653.78 2847.01   1
  -4  -8 -18 2233.48 2648.07   1
   4   8  18 2787.56 2739.54   1
  -4   8 -18 2276.24 2792.13   1
   4  -8  19 4351.70 2467.41   1
   4  -8  19 -525.27 2700.66   1
  -4  -8 -19 2364.51 2508.57   1
   4   8  19   68.92 2600.04   1
  -4   8 -19 1358.33 2730.39   1
  -4   8 -19 -208.51 2549.73   1
   4  -8  20 6679.62 2872.17  -1
   4  -8  20 4244.22 3231.19  -1
  -4  -8 -20 5076.60 2632.06  -1
   4   8  20 3610.79 3331.81  -1
  -4   8 -20 2056.02 2888.17  -1
  -4   8 -20 4134.46 2865.31  -1
   4  -8  21  19172. 5472.21   1
   4  -8  21 5314.42 3279.21   1
  -4  -8 -21  14493. 4468.32   1
   4   8  21  20979. 5977.58   1
  -4   8 -21  18630. 5796.93   1
  -4   8 -21  16279. 4966.84   1
   4  -8  22 3107.70 2323.35   1
   4  -8  22 1514.29 3004.80   1
  -4  -8 -22 7839.00 3510.17   1
   4   8  22 1445.23 2698.37   1
  -4   8 -22  813.86 2728.10   1
  -4   8 -22 2760.12 2826.43   1
   4  -8  23  603.93 1951.75   1
   4  -8  23 1986.73 2888.17   1
  -4  -8 -23 2293.62 2817.29   1
   4   8  23 2565.74 2764.69   1
  -4   8 -23 1379.14 2707.52   1
  -4   8 -23 2266.18 2554.31   1
   4  -8  24 4477.47 2520.01   1
   4  -8  24 2035.21 2933.91   1
  -4  -8 -24 5332.72 3254.06   1
   4   8  24 3071.12 3002.51   1
  -4   8 -24 3622.22 3272.35   1
  -4   8 -24 2481.13 2867.59   1
   4  -8  25 2205.12 1976.22   1
   4  -8  25 2847.01 3368.39   1
  -4  -8 -25 2657.21 3034.53   1
   4   8  25 2082.09 3109.99   1
  -4   8 -25 3501.03 3119.14   1
  -4   8 -25 9524.34 3848.61   1
   4  10   0 6197.11 2748.68   1
   4  10   0 5824.37 2657.21   1
  -4 -10   0  16046. 4024.69   1
  -4 -10   0 5920.42 2815.00   1
   4 -10   0 7530.29 2435.40   1
   4 -10   0  18219. 5433.34   1
  -4  10   0  14532. 3871.48   1
  -4  10   0  14944. 4955.40   1
   4 -10   1  10050. 2956.78   1
   4 -10   1 9531.21 3741.14   1
  -4  10   1 7964.78 2471.98   1
  -4  10   1  21875. 6181.10   1
   4  10  -1 7752.11 2243.77   1
   4  10  -1  36222. 9060.13   1
  -4 -10  -1 9737.01 3192.31   1
  -4 -10  -1  13750. 3807.45   1
   4  10   1 2144.06 2471.98   1
   4  10   1 6814.54 2732.68   1
  -4 -10   1  12794. 4038.41   1
  -4 -10   1 9576.94 2517.72   1
   4 -10  -1  13910. 3793.73   1
   4 -10  -1  13638. 4461.46   1
  -4  10  -1 9213.35 2728.10   1
  -4  10  -1  13833. 4536.93   1
   4 -10   2  11315. 3169.45   1
   4 -10   2  12719. 4141.32   1
  -4  10   2  18985. 4857.07   1
  -4  10   2 6835.12 3485.02   1
   4  10  -2  11992. 3061.97   1
   4  10  -2  11637. 3953.80   1
  -4 -10  -2  21946. 5730.61   1
  -4 -10  -2  15310. 4182.48   1
   4  10   2  13238. 3837.18   1
  -4 -10   2  14201. 4239.65   1
  -4 -10   2  13311. 3270.06   1
   4 -10  -2  13103. 3574.20   1
   4 -10  -2 9538.07 3727.41   1
  -4  10  -2  13400. 3654.24   1
  -4  10  -2  13185. 4429.45   1
   4 -10   3 4152.75 1737.94   1
   4 -10   3 8278.06 3352.39   1
  -4  10   3  14445. 3887.49   1
  -4  10   3 4811.34 3187.74   1
   4  10  -3  23439. 6268.00   1
  -4 -10  -3 4349.41 2343.93   1
   4  10   3 6629.31 2657.21   1
  -4 -10   3 7935.05 3119.14   1
  -4 -10   3 6037.04 1619.71   1
   4 -10  -3 5556.82 2117.31   1
   4 -10  -3 4203.06 3045.96   1
  -4  10  -3  11386. 3224.33   1
  -4  10  -3 2876.74 2721.24   1
   4 -10   4  54974.  13195.   1
   4 -10   4  42534.  10604.   1
  -4  10   4  56780.  13698.   1
  -4  10   4  39698.  10087.   1
   4  10  -4  53007.  13005.   1
   4  10  -4  43334.  10263.   1
  -4 -10  -4  40293. 9899.37   1
   4  10   4  42808.  10510.   1
  -4 -10   4  39401. 9874.22   1
  -4 -10   4  51818.  12259.   1
   4 -10  -4  39630. 9718.72   1
   4 -10  -4  41390.  10517.   1
  -4  10  -4  39126. 9538.07   1
  -4  10  -4  41390.  10265.   1
   4 -10   5  92339.  21916.   1
   4 -10   5  64509.  15637.   1
  -4  10   5  66247.  15941.   1
  -4  10   5  59753.  14638.   1
   4  10  -5  65401.  15440.   1
   4  10  -5  46787.  11614.   1
  -4 -10  -5  49783.  12088.   1
   4  10   5  55248.  13407.   1
  -4 -10   5  52573.  12842.   1
  -4 -10   5  69678.  16456.   1
   4 -10  -5  87240.  20880.   1
   4 -10  -5  75463.  18319.   1
  -4  10  -5  76035.  18134.   1
  -4  10  -5  76904.  18488.   1
   4 -10   6  24949. 6213.12   1
   4 -10   6  28424. 7338.20   1
  -4  10   6  31512. 7898.46   1
  -4  10   6  16837. 4873.08   1
   4  10  -6  25269. 6043.90   1
   4  10  -6  40155.  10041.   1
  -4 -10  -6  19129. 5154.35   1
  -4 -10   6  39744. 9926.81   1
  -4 -10   6  30505. 7290.18   1
   4 -10  -6  33913. 8559.33   1
   4 -10  -6  35719. 9222.49   1
  -4  10  -6  28539. 7068.37   1
  -4  10  -6  29088. 7528.01   1
   4 -10   7  31512. 7710.95   1
   4 -10   7  17640. 4985.13   1
  -4  10   7  17160. 4674.13   1
   4  10  -7  34896. 8310.08   1
   4  10  -7  18479. 5305.28   1
  -4 -10  -7  18774. 5051.45   1
   4  10   7  14139. 4214.49   1
  -4 -10   7  42282.  10112.   1
  -4 -10   7  27007. 7125.54   1
  -4  10  -7  27830. 6892.29   1
  -4  10  -7  22527. 6082.77   1
   4 -10   8  46993.  11308.  -1
   4 -10   8  49989.  12289.  -1
  -4  10   8  60759.  14706.  -1
   4  10  -8  72056.  17048.  -1
   4  10  -8  34073. 8669.10  -1
  -4 -10  -8  51818.  12623.  -1
   4  10   8  55934.  13608.  -1
  -4 -10   8  47336.  11361.  -1
   4 -10  -8  72422.  17535.  -1
  -4  10  -8  41619.  10089.  -1
  -4  10  -8  57489.  14013.  -1
   4 -10   9  26801. 6647.60   1
   4 -10   9  15353. 4664.99   1
  -4  10   9  31306. 7948.77   1
   4  10  -9  39424. 9448.88   1
  -4 -10  -9  22129. 6025.61   1
   4  10   9  15008. 4500.34   1
  -4 -10   9  36680. 8902.35   1
   4 -10  -9  38235. 9684.42   1
  -4  10  -9  15065. 4063.57   1
  -4  10  -9  13003. 4120.74   1
   4 -10  10  33730. 8255.19   1
   4 -10  10  18621. 5387.60   1
  -4  10  10  19056. 5460.78   1
   4  10 -10  22131. 5465.35   1
  -4 -10 -10  16613. 4694.71   1
   4  10  10  17882. 5117.76   1
  -4 -10  10  17164. 4450.03   1
   4 -10 -10  11610. 4363.13   1
  -4  10 -10  25086. 6332.03   1
  -4  10 -10  26869. 7050.07   1
   4 -10  11  14109. 3823.46   1
   4 -10  11 5069.74 2954.49   1
  -4  10  11  19410. 5812.94   1
   4  10 -11 4317.40 1637.55   1
  -4 -10 -11  10553. 3498.74   1
   4  10  11 9485.47 3446.14   1
   4 -10 -11 6631.60 4349.41   1
  -4  10 -11 7923.61 2709.81   1
  -4  10 -11 8131.71 3217.47   1
   4 -10  12  11521. 3295.22   1
   4 -10  12 9140.17 3517.03   1
  -4  10  12  11724. 4472.90   1
  -4 -10 -12 8310.08 3077.98   1
   4  10  12 4461.46 2407.96   1
   4 -10 -12 6503.54 4436.31   1
  -4  10 -12  17944. 4813.62   1
  -4  10 -12 8728.55 3331.81   1
   4 -10  13 2654.93 1685.57   1
   4 -10  13  878.57 2524.58   1
  -4  10  13  460.32 3130.57   1
  -4 -10 -13 1601.42 2109.99   1
   4  10  13 5538.53 2462.84   1
   4 -10 -13 3315.80 4930.25   1
  -4  10 -13 4616.96 2189.34   1
  -4  10 -13 1083.01 2444.54   1
   4 -10  14  12472. 3587.92   1
   4 -10  14 3965.24 2840.15   1
  -4  10  14 5707.75 3510.17   1
  -4 -10 -14 9974.84 3308.94   1
   4  10  14 9332.26 3402.70   1
   4 -10 -14 2194.37 4850.21   1
  -4  10 -14 8733.13 2984.22   1
  -4  10 -14  11699. 3983.53   1
   4 -10  15 4539.21 2204.89   1
   4 -10  15 5117.76 2885.89   1
  -4  10  15 5241.25 3825.75   1
  -4 -10 -15 6110.22 2549.73   1
   4  10  15  14244. 4287.67   1
   4 -10 -15  479.99 5369.31   1
  -4  10 -15 6997.48 2707.52   1
  -4  10 -15 6633.88 3107.70   1
   4 -10  16 3109.99 2149.09   1
   4 -10  16 3695.40 2993.37   1
  -4  10  16 2142.23 3395.83   1
  -4 -10 -16 2387.37 2385.09   1
   4  10  16 1554.31 2504.00   1
   4 -10 -16 1029.73 4991.99   1
  -4  10 -16 2540.59 2337.07   1
  -4  10 -16 -561.86 2622.91   1
   4 -10  17  13636. 4088.72   1
   4 -10  17 7388.51 3711.41   1
  -4  10  17 6640.74 3878.34   1
  -4 -10 -17  14917. 4527.78   1
   4  10  17  15657. 4758.74   1
   4 -10 -17 1734.05 4841.07   1
  -4  10 -17 5417.33 2924.76   1
  -4  10 -17  10540. 3734.27   1
   4 -10  18 2497.14 2225.70   1
   4 -10  18 2226.16 2931.62   1
  -4 -10 -18  424.19 2159.39   1
   4  10  18 6787.10 3187.74   1
   4 -10 -18 -341.64 4680.99   1
  -4  10 -18 1147.72 2513.15   1
  -4  10 -18 3869.19 2897.32   1
   4 -10  19  16714. 4902.81   1
   4 -10  19  12284. 4292.24   1
  -4 -10 -19  11598. 3896.63   1
   4  10  19 8031.09 3558.19   1
  -4  10 -19  14610. 4820.48   1
  -4  10 -19  11162. 3940.08   1
   4 -10  20  15699. 4701.57   1
   4 -10  20 5959.29 3430.14   1
  -4 -10 -20 3974.38 2526.87   1
   4  10  20 4735.88 3388.97   1
  -4  10 -20  13318. 4637.54   1
  -4  10 -20 2574.89 2689.23   1
   4 -10  21  10844. 3574.20   1
   4 -10  21 2515.43 2755.54   1
  -4 -10 -21 5961.58 3045.96   1
   4  10  21 6288.58 3407.27   1
  -4  10 -21 6583.57 3496.45   1
  -4  10 -21 5376.17 3045.96   1
   4 -10  22  24720. 6590.44  -1
   4 -10  22  15305. 5037.73  -1
  -4 -10 -22  23302. 6263.43  -1
   4  10  22  24674. 6883.14  -1
  -4  10 -22  17514. 5456.20  -1
  -4  10 -22  25429. 6853.41  -1
   4 -10  23 6345.75 2924.76   1
   4 -10  23 3679.39 3174.02   1
  -4 -10 -23 4591.81 3100.84   1
   4  10  23 4566.65 3286.07   1
  -4  10 -23 3866.91 3247.20   1
  -4  10 -23 2262.75 2728.10   1
   4 -10  24  18443. 5222.95  -1
   4 -10  24 9757.59 4191.63  -1
  -4 -10 -24  12557. 4463.75  -1
   4  10  24  15404. 5158.92  -1
  -4  10 -24  13483. 4701.57  -1
  -4  10 -24  13188. 4667.27  -1
   4  12   0  17841. 4715.29   1
   4  12   0  23828. 6306.88   1
  -4 -12   0  30940. 7544.01   1
  -4 -12   0  28607. 7278.75   1
   4 -12   0  32037. 7946.48   1
   4 -12   0  29156. 7724.67   1
  -4  12   0  22026. 5620.85   1
  -4  12   0  24834. 6960.89   1
   4 -12   1 2341.64 1607.82   1
   4 -12   1 2506.29 2629.77   1
  -4  12   1 1665.67 1500.57   1
  -4  12   1 2931.62 3068.83   1
   4  12  -1 1582.66 1555.68   1
   4  12  -1 2959.06 2741.82   1
  -4 -12  -1  14557. 4161.90   1
  -4 -12  -1 3706.83 1764.00   1
   4  12   1 3331.81 3158.01   1
   4  12   1 6302.30 2730.39   1
  -4 -12   1 5552.25 1882.69   1
  -4 -12   1 3501.03 2524.58   1
   4 -12  -1 2181.11 1708.21   1
   4 -12  -1 3862.33 3114.56   1
  -4  12  -1 1908.53 1505.37   1
  -4  12  -1 5213.81 3322.66   1
   4 -12   2  17180. 4447.74   1
   4 -12   2  14615. 4653.55   1
  -4  12   2 4694.71 1872.85   1
  -4  12   2 7614.90 3507.89   1
   4  12  -2  29408. 7708.66   1
   4  12  -2 7864.16 2232.56   1
  -4 -12  -2  11877. 3832.61   1
  -4 -12  -2 8474.72 2901.90   1
   4  12   2  11313. 3549.05   1
   4  12   2 3251.77 3617.65   1
  -4 -12   2  14798. 3693.11   1
  -4 -12   2  12218. 3926.36   1
   4 -12  -2  11962. 3443.86   1
   4 -12  -2 8170.58 3736.56   1
  -4  12  -2  23554. 6567.57   1
   4 -12   3 2613.76 1435.17   1
   4 -12   3 9233.93 3663.39   1
  -4  12   3 7866.45 2547.45   1
  -4  12   3  12495. 4356.27   1
   4  12  -3  11244. 2883.60   1
   4  12  -3 9835.34 3873.77   1
  -4 -12  -3 5860.96 2570.32   1
  -4 -12  -3 9780.46 3597.07   1
   4  12   3 2766.98 3574.20   1
   4  12   3 5902.12 2837.87   1
  -4 -12   3 7818.42 3011.66   1
  -4 -12   3 7948.77 2143.61   1
   4 -12  -3 3231.19 1771.78   1
   4 -12  -3  11383. 4219.07   1
  -4  12  -3 9103.58 2682.37   1
  -4  12  -3 3935.51 2798.99   1
   4 -12   4  11500. 3190.03   1
   4 -12   4  16154. 4754.17   1
  -4  12   4  11079. 3260.92   1
  -4  12   4 8083.69 3773.15   1
   4  12  -4  14089. 3496.45   1
   4  12  -4 6846.55 3251.77   1
  -4 -12  -4 9762.17 3647.38   1
  -4 -12  -4  11031. 3439.28   1
   4  12   4  12538. 3873.77   1
  -4 -12   4  11848. 2965.92   1
  -4 -12   4  20691. 5646.00   1
   4 -12  -4 8799.44 2844.73   1
   4 -12  -4 8938.93 3796.02   1
  -4  12  -4  12364. 3425.56   1
  -4  12  -4  12419. 4166.47   1
   4 -12   5  39790. 9647.83   1
   4 -12   5  34896. 8847.46   1
  -4  12   5  57352.  13913.   1
  -4  12   5  41573.  10695.   1
   4  12  -5  47382.  11836.   1
   4  12  -5  49280.  11674.   1
  -4 -12  -5  40361. 9931.39   1
   4  12   5  45255.  11162.   1
  -4 -12   5  46215.  11420.   1
  -4 -12   5  44409.  10544.   1
   4 -12  -5  33775. 8531.89   1
   4 -12  -5  33707. 8801.73   1
  -4  12  -5  38806. 9446.60   1
  -4  12  -5  41871.  10482.   1
   4 -12   6  26023. 6466.95   1
   4 -12   6  36177. 9119.59   1
  -4  12   6  31694. 8049.39   1
   4  12  -6  33295. 8776.58   1
   4  12  -6  39081. 9288.81   1
  -4 -12  -6  41802.  10279.   1
   4  12   6  49005.  12015.   1
  -4 -12   6  34256. 8182.02   1
  -4 -12   6  34759. 8870.33   1
   4 -12  -6  28630. 7717.81   1
   4 -12  -6  37617. 9531.21   1
  -4  12  -6  40796. 9908.52   1
  -4  12  -6  26961. 7120.96   1
   4 -12   7  28470. 7047.79   1
   4 -12   7  15308. 4584.95   1
  -4  12   7  29339. 7516.57   1
   4  12  -7  24766. 5961.58   1
   4  12  -7  22127. 6412.07   1
  -4 -12  -7  25635. 6590.44   1
   4  12   7  32380. 8230.04   1
  -4 -12   7  26938. 6501.25   1
  -4 -12   7  29270. 7564.59   1
   4 -12  -7  29682. 7770.40   1
  -4  12  -7  26504. 6636.17   1
  -4  12  -7  18063. 5136.06   1
   4 -12   8  36405. 8881.77   1
   4 -12   8  33158. 8463.29   1
  -4  12   8  38852. 9643.26   1
   4  12  -8  44363.  10547.   1
   4  12  -8  30277. 8028.81   1
  -4 -12  -8  37091. 9206.49   1
   4  12   8  63183.  15271.   1
  -4 -12   8  29431. 7091.23   1
   4 -12  -8  41047.  10274.   1
  -4  12  -8  30048. 7457.12   1
  -4  12  -8  42465.  10521.   1
   4 -12   9 9311.68 2808.14   1
   4 -12   9 7825.28 3226.61   1
  -4  12   9 8168.30 2936.20   1
   4  12  -9 8092.83 2211.29   1
  -4 -12  -9 7100.38 2888.17   1
   4  12   9  13974. 4219.07   1
  -4 -12   9 8477.01 2586.32   1
   4 -12  -9 6364.05 3128.28   1
  -4  12  -9 5337.29 2164.19   1
  -4  12  -9  23348. 6183.39   1
   4 -12  10  12070. 3386.69  -1
   4 -12  10  68488.  16584.  -1
  -4  12  10  17091. 4948.54  -1
   4  12 -10  25086. 6165.10  -1
  -4 -12 -10  32129. 8076.83  -1
  -4 -12  10  22296. 5668.87  -1
   4 -12 -10  10252. 3882.91  -1
  -4  12 -10  17542. 4710.72  -1
  -4  12 -10  48959.  12021.  -1
   4 -12  11  18292. 4809.05   1
   4 -12  11  35353. 9016.68   1
  -4  12  11 9981.70 3857.76   1
   4  12 -11  12424. 3377.54   1
  -4 -12 -11  12991. 3928.65   1
   4  12  11  11365. 3647.38   1
  -4 -12  11 9293.38 2949.92   1
   4 -12 -11 9636.40 3935.51   1
  -4  12 -11  10592. 3228.90   1
  -4  12 -11 8975.52 3279.21   1
   4 -12  12  46421.  11265.   1
   4 -12  12  30986. 8067.68   1
  -4  12  12  34896. 9432.88   1
   4  12 -12  38166. 9270.51   1
  -4 -12 -12  39812. 9883.37   1
   4  12  12  32518. 8248.33   1
  -4 -12  12  40887. 9983.98   1
   4 -12 -12  21576. 7141.54   1
  -4  12 -12  46375.  11342.   1
  -4  12 -12  30917. 7987.64   1
   4 -12  13 6219.98 2254.51  -1
   4 -12  13 3635.94 2842.44  -1
  -4  12  13 1004.34 3729.70  -1
   4  12 -13 5019.43 2048.02  -1
  -4 -12 -13 2755.54 2359.93  -1
   4  12  13 1001.83 2307.34  -1
  -4 -12  13  134.16 1646.92  -1
   4 -12 -13 2118.22 4813.62  -1
  -4  12 -13 3754.86 2073.17  -1
  -4  12 -13 3201.46 2760.12  -1
   4 -12  14 1988.34 1563.23   1
   4 -12  14 4324.26 3043.67   1
  -4  12  14 4237.36 3528.47   1
   4  12 -14 7079.80 2490.28   1
  -4 -12 -14 7104.96 3089.41   1
   4  12  14  885.43 2375.94   1
  -4 -12  14 1710.72 1936.65   1
   4 -12 -14 1358.11 4342.55   1
  -4  12 -14 3450.72 2000.91   1
  -4  12 -14 5104.04 3048.25   1
   4 -12  15  13069. 3709.12   1
   4 -12  15 9101.29 3608.50   1
  -4  12  15 4205.35 3587.92   1
   4  12 -15 6343.46 2375.94   1
  -4 -12 -15  11605. 3791.44   1
   4  12  15 8570.77 3551.33   1
   4 -12 -15 3940.08 4813.62   1
  -4  12 -15  11123. 3370.68   1
  -4  12 -15  10354. 3748.00   1
   4 -12  16 4699.29 2123.71  -1
   4 -12  16 3775.44 2659.50  -1
  -4  12  16 2005.49 3155.73  -1
   4  12 -16  832.84 1633.66  -1
  -4 -12 -16 6297.73 3112.28  -1
   4  12  16 3878.34 2773.84  -1
   4 -12 -16 3192.31 4621.54  -1
  -4  12 -16 1885.89 1951.29  -1
  -4  12 -16 2867.59 2609.19  -1
   4 -12  17 4959.98 2314.20   1
   4 -12  17 5241.25 3128.28   1
  -4  12  17 3599.36 3272.35   1
  -4 -12 -17 3969.81 2670.93   1
   4  12  17 2556.59 2741.82   1
   4 -12 -17 1298.42 4264.80   1
  -4  12 -17 5696.31 2693.80   1
  -4  12 -17 3617.65 2508.57   1
   4 -12  18  930.02 2024.01   1
   4 -12  18  774.30 2769.26   1
  -4  12  18  841.98 2949.92   1
  -4 -12 -18 2164.87 2401.10   1
   4  12  18  843.13 2458.26   1
   4 -12 -18 2181.57 4157.33   1
  -4  12 -18 2024.92 2214.95   1
  -4  12 -18 2952.20 2725.81   1
   4 -12  19 6080.49 2858.45   1
   4 -12  19 5069.74 2943.06   1
  -4  12  19 1444.09 2952.20   1
  -4 -12 -19 4171.05 2730.39   1
   4  12  19 4555.22 3112.28   1
   4 -12 -19 2419.39 3905.78   1
  -4  12 -19  11251. 4136.74   1
  -4  12 -19 5767.20 3043.67   1
   4 -12  20 5643.72 2714.38  -1
   4 -12  20 1739.54 2833.29  -1
  -4 -12 -20 3160.30 2716.67  -1
   4  12  20  720.79 2874.45  -1
   4 -12 -20 1986.73 4324.26  -1
  -4  12 -20 4738.16 3023.09  -1
  -4  12 -20 1930.02 2517.72  -1
   4 -12  21 4957.69 2805.85   1
   4 -12  21 5154.35 3027.67   1
  -4 -12 -21 1064.49 2593.18   1
   4  12  21 4495.77 3240.34   1
  -4  12 -21  13014. 4694.71   1
  -4  12 -21 3002.51 2762.40   1
   4 -12  22  16103. 4799.90   1
   4 -12  22 5595.70 3512.46   1
  -4 -12 -22 8101.98 3555.91   1
   4  12  22 4845.64 3260.92   1
  -4  12 -22 6755.08 3590.21   1
  -4  12 -22 5870.11 3263.20   1
   4 -12  23 4909.67 2762.40   1
   4 -12  23 4260.23 3183.17   1
  -4 -12 -23 2086.44 3208.32   1
   4  12  23 2558.88 3480.44   1
  -4  12 -23 3610.79 3263.20   1
  -4  12 -23 5906.69 3361.53   1
   4  14   0 5995.88 2378.23   1
   4  14   0 9684.42 3453.00   1
  -4 -14   0 9499.19 3201.46   1
  -4 -14   0 8712.55 2691.51   1
   4 -14   0 9389.43 2863.02   1
   4 -14   0  11612. 4363.13   1
  -4  14   0  11694. 3336.38   1
  -4  14   0 8632.51 4015.55   1
   4 -14   1 6210.83 2300.48   1
   4 -14   1 5211.52 3327.23   1
  -4  14   1 6928.88 3816.60   1
  -4  14   1 6707.06 2391.95   1
   4  14  -1 5385.31 2185.68   1
   4  14  -1 5286.98 3132.86   1
  -4 -14  -1 5559.11 2423.96   1
  -4 -14  -1 5556.82 2099.24   1
   4  14   1  17363. 4761.03   1
   4  14   1 3478.16 2407.96   1
  -4 -14   1 7340.49 2211.52   1
  -4 -14   1 6350.33 2762.40   1
   4 -14  -1 5065.17 2142.69   1
   4 -14  -1 7342.78 3702.26   1
  -4  14  -1 5044.59 2074.78   1
  -4  14  -1 7123.25 3606.22   1
   4 -14   2 3551.33 1804.25   1
   4 -14   2 4628.40 3126.00   1
  -4  14   2 3439.28 3402.70   1
  -4  14   2 6780.24 2357.65   1
   4  14  -2 2677.79 1363.14   1
   4  14  -2  11964. 4278.52   1
  -4 -14  -2 6485.24 2499.43   1
  -4 -14  -2 2641.20 1799.91   1
   4  14   2 2915.62 3045.96   1
   4  14   2 2760.12 2213.81   1
  -4 -14   2 5554.53 1743.20   1
  -4 -14   2 5415.04 2691.51   1
   4 -14  -2 3082.55 1839.24   1
   4 -14  -2 1752.34 2908.76   1
  -4  14  -2 6023.32 2167.16   1
  -4  14  -2 6389.20 3480.44   1
   4 -14   3 1762.18 1573.52   1
   4 -14   3 3103.13 3068.83   1
  -4  14   3 3887.49 3427.85   1
  -4  14   3 3174.02 1729.47   1
   4  14  -3 3894.35 1392.64   1
   4  14  -3 6123.94 3382.11   1
  -4 -14  -3 5385.31 2426.25   1
  -4 -14  -3  15426. 4580.38   1
   4  14   3 2547.45 3814.31   1
   4  14   3  984.22 2285.16   1
  -4 -14   3 6567.57 1930.02   1
  -4 -14   3  21045. 5803.79   1
   4 -14  -3 2856.16 1708.67   1
   4 -14  -3 1273.95 3210.61   1
  -4  14  -3 4415.73 2018.52   1
  -4  14  -3 3718.27 3158.01   1
   4 -14   4 4548.36 1875.14   1
   4 -14   4 9668.41 3647.38   1
  -4  14   4 5858.67 3535.33   1
  -4  14   4 7086.66 2643.49   1
   4  14  -4 6261.14 1860.28   1
   4  14  -4 6485.24 3510.17   1
  -4 -14  -4 3201.46 1992.68   1
  -4 -14  -4 5074.31 2997.94   1
   4  14   4  681.23 3887.49   1
   4  14   4 5630.00 2643.49   1
  -4 -14   4 8321.51 2279.67   1
  -4 -14   4 9398.57 3471.30   1
   4 -14  -4 4358.56 2193.23   1
   4 -14  -4 4827.35 3071.12   1
  -4  14  -4 6654.46 2327.92   1
  -4  14  -4 7068.37 3464.44   1
   4 -14   5  18296. 4788.47   1
   4 -14   5  22113. 6087.35   1
  -4  14   5  14201. 4831.92   1
  -4  14   5  34667. 8746.85   1
   4  14  -5  25063. 6073.63   1
   4  14  -5  30185. 7912.18   1
  -4 -14  -5  21976. 5698.60   1
  -4 -14  -5  20876. 5989.02   1
   4  14   5 7640.06 4669.56   1
   4  14   5  20048. 5444.77   1
  -4 -14   5  25314. 6702.49   1
  -4 -14   5  32175. 7724.67   1
   4 -14  -5  22499. 5931.85   1
   4 -14  -5  13805. 4518.63   1
  -4  14  -5  31077. 7740.67   1
  -4  14  -5  26321. 7043.21   1
   4 -14   6  18193. 4781.61   1
   4 -14   6  20206. 5652.86   1
  -4  14   6  20835. 5785.50   1
   4  14  -6  20777. 5069.74   1
   4  14  -6  36131. 9224.78   1
  -4 -14  -6  24926. 6361.76   1
  -4 -14  -6  13371. 4559.79   1
   4  14   6  16419. 4781.61   1
  -4 -14   6  36725. 9142.46   1
  -4 -14   6  16504. 4086.44   1
   4 -14  -6  17608. 5252.68   1
   4 -14  -6  15984. 4946.26   1
  -4  14  -6  21374. 5511.09   1
  -4  14  -6  12714. 4116.16   1
   4 -14   7 7283.32 2419.39   1
   4 -14   7  18404. 5248.11   1
  -4  14   7 6492.10 2844.73   1
   4  14  -7 2593.18 2545.16   1
   4  14  -7 6915.15 1963.87   1
  -4 -14  -7 7223.87 2657.21   1
   4  14   7 5732.90 2670.93   1
  -4 -14   7  12280. 3148.86   1
  -4 -14   7 4612.39 2378.23   1
   4 -14  -7 5705.46 3011.66   1
  -4  14  -7 7308.48 2465.12   1
  -4  14  -7  10759. 3597.07   1
   4 -14   8  13051. 3681.68   1
   4 -14   8 9753.02 3549.05   1
  -4  14   8  18209. 5268.69   1
   4  14  -8  10576. 2766.98   1
   4  14  -8 6832.83 3240.34   1
  -4 -14  -8 8392.40 3098.56   1
   4  14   8  19966. 5488.22   1
  -4 -14   8  16673. 4164.19   1
   4 -14  -8  11699. 4285.38   1
  -4  14  -8  13183. 3757.14   1
  -4  14  -8  12102. 4125.31   1
   4 -14   9 1383.49 1612.85   1
   4 -14   9 1850.22 2568.03   1
  -4  14   9 6656.75 2963.64   1
   4  14  -9 4164.19 1509.03   1
  -4 -14  -9 3613.08 2154.81   1
   4  14   9 3295.22 2423.96   1
  -4 -14   9 3917.22 1411.16   1
   4 -14  -9  19408. 5694.03   1
  -4  14  -9 7484.56 2602.33   1
  -4  14  -9 1382.57 2773.84   1
   4 -14  10  43563.  10617.   1
   4 -14  10  21818. 6089.63   1
  -4  14  10  14734. 4685.57   1
   4  14 -10  25086. 6107.93   1
  -4 -14 -10  18422. 5106.33   1
   4  14  10  19899. 5559.11   1
  -4 -14  10  23576. 5778.64   1
   4 -14 -10  27807. 7672.07   1
  -4  14 -10  18658. 4930.25   1
  -4  14 -10  18001. 5426.48   1
   4 -14  11 6668.19 2321.06   1
   4 -14  11 9281.95 3667.96   1
  -4  14  11 6476.10 3361.53   1
   4  14 -11  11004. 2915.62   1
  -4 -14 -11 3167.16 2323.35   1
   4  14  11 1795.33 2439.97   1
  -4 -14  11  10348. 2933.91   1
   4 -14 -11 2597.76 3343.24   1
  -4  14 -11 5769.49 2364.51   1
  -4  14 -11 8932.08 3462.15   1
   4 -14  12 3807.45 1834.89  -1
   4 -14  12 1634.80 2602.33  -1
  -4  14  12 3002.51 3178.59  -1
   4  14 -12  15998. 4086.44  -1
  -4 -14 -12 1233.02 2137.89  -1
   4  14  12 7358.79 3096.27  -1
  -4 -14  12 1749.83 1756.69  -1
   4 -14 -12 1504.23 3203.75  -1
  -4  14 -12 2762.40 1907.38  -1
  -4  14 -12 6382.34 2997.94  -1
   4 -14  13 3432.42 1813.86   1
   4 -14  13 2348.50 2558.88   1
  -4  14  13 2253.14 3206.03   1
   4  14 -13 2725.81 1671.62   1
  -4 -14 -13  361.31 2068.83   1
   4  14  13 5856.39 2911.04   1
  -4 -14  13  702.95 1940.54   1
   4 -14 -13 1990.39 3924.08   1
  -4  14 -13 4145.89 2133.09   1
  -4  14 -13 2193.69 2517.72   1
   4 -14  14 3457.58 1955.63   1
   4 -14  14 3288.36 2666.36   1
  -4  14  14 3203.75 3299.79   1
   4  14 -14 5607.13 2286.76   1
  -4 -14 -14 1946.72 2241.48   1
   4  14  14 7100.38 3130.57   1
  -4 -14  14 2863.02 2269.38   1
   4 -14 -14 2159.39 4081.86   1
  -4  14 -14 4603.24 2369.08   1
  -4  14 -14 4315.11 2815.00   1
   4 -14  15 3121.42 1943.74   1
   4 -14  15 2686.94 2627.48   1
  -4  14  15 1723.30 3231.19   1
   4  14 -15 4980.56 2382.80   1
  -4 -14 -15 2890.46 2314.20   1
   4  14  15 4031.55 2684.65   1
  -4 -14  15 1815.69 2403.38   1
   4 -14 -15 -723.07 4068.14   1
  -4  14 -15 2636.63 2126.68   1
  -4  14 -15 4959.98 2936.20   1
   4 -14  16 2389.66 1844.96  -1
   4 -14  16 2387.37 2549.73  -1
  -4  14  16  611.71 3029.95  -1
   4  14 -16  293.39 1854.79  -1
  -4 -14 -16  638.23 2396.52  -1
   4  14  16  763.32 2771.55  -1
  -4 -14  16 2995.65 2316.49  -1
   4 -14 -16 -1456.9 3850.90  -1
  -4  14 -16 2931.62 2166.02  -1
  -4  14 -16 1147.49 2584.04  -1
   4 -14  17 1992.22 1844.50   1
   4 -14  17 4575.80 2938.48   1
  -4  14  17 2089.41 3103.13   1
   4  14 -17  -59.80 1811.11   1
  -4 -14 -17 2266.63 2403.38   1
   4  14  17 5270.98 3057.39   1
  -4 -14  17  173.54 2051.22   1
   4 -14 -17  630.46 3951.52   1
  -4  14 -17 1665.67 2115.71   1
  -4  14 -17 2460.55 2476.56   1
   4 -14  18 6114.79 2602.33   1
   4 -14  18 5511.09 3153.44   1
  -4  14  18 3718.27 3434.71   1
   4  14 -18 9721.01 3224.33   1
  -4 -14 -18 5152.06 2782.98   1
   4  14  18 5213.81 3130.57   1
  -4 -14  18 6622.45 2911.04   1
   4 -14 -18 3578.78 4402.01   1
  -4  14 -18 2028.13 2321.06   1
  -4  14 -18 5053.73 2981.93   1
   4 -14  19 4582.66 2366.79   1
   4 -14  19 4788.47 2929.34   1
  -4  14  19 2714.38 3512.46   1
   4  14 -19 4962.26 2506.29   1
  -4 -14 -19 7784.12 3533.04   1
   4  14  19 3050.53 2847.01   1
   4 -14 -19 4015.55 4973.70   1
  -4  14 -19  11777. 3910.36   1
  -4  14 -19 2604.62 2805.85   1
   4 -14  20  10370. 3606.22   1
   4 -14  20 9094.43 3903.49   1
  -4  14  20 2972.78 4294.53   1
   4  14 -20 4655.84 2382.80   1
  -4 -14 -20 8506.74 3743.42   1
   4  14  20 5056.02 3544.47   1
   4 -14 -20 1805.62 5545.39   1
  -4  14 -20  10361. 3663.39   1
  -4  14 -20  14718. 4719.87   1
   4 -14  21  172.06 2142.92   1
   4 -14  21 2549.73 3059.68   1
  -4  14  21 1514.29 4058.99   1
  -4 -14 -21  675.74 2913.33   1
   4  14  21  630.00 3322.66   1
   4 -14 -21 -1659.7 5339.58   1
  -4  14 -21 3894.35 2879.03   1
  -4  14 -21 1530.98 2995.65   1
   4  16   0 5952.43 2849.30   1
   4  16   0 4765.60 2760.12   1
  -4 -16   0  11335. 3423.28   1
  -4 -16   0 7294.76 2561.17   1
   4 -16   0 3949.23 2286.07   1
   4 -16   0 3885.20 2860.73   1
  -4  16   0 5346.44 2476.56   1
  -4  16   0 6128.51 3109.99   1
   4 -16   1  10549. 3375.25   1
   4 -16   1 3926.36 2529.15   1
  -4  16   1  10357. 3311.22   1
  -4  16   1 4863.93 2837.87   1
   4  16  -1 7518.86 2792.13   1
   4  16  -1 3345.53 2595.47   1
  -4 -16  -1  21493. 5650.58   1
  -4 -16  -1 3480.44 1949.92   1
   4  16   1 3427.85 2369.08   1
   4  16   1 2698.37 2515.43   1
  -4 -16   1 4411.15 2090.55   1
  -4 -16   1 8621.08 2625.20   1
   4 -16  -1 8536.47 2936.20   1
   4 -16  -1 5145.20 2744.11   1
  -4  16  -1 5403.61 2327.92   1
  -4  16  -1 4319.68 2856.16   1
   4 -16   2 6686.48 2451.40   1
   4 -16   2 5197.80 2780.70   1
  -4  16   2 3860.05 2215.41   1
  -4  16   2 1714.38 2847.01   1
   4  16  -2 6567.57 3009.37   1
   4  16  -2 5954.72 2179.28   1
  -4 -16  -2 3757.14 2146.12   1
  -4 -16  -2 6647.60 2638.92   1
   4  16   2 7219.29 2920.19   1
   4  16   2 8774.29 3688.54   1
  -4 -16   2  11688. 3194.60   1
  -4 -16   2 6297.73 2405.67   1
   4 -16  -2 7271.89 2819.57   1
   4 -16  -2 5483.64 2869.88   1
  -4  16  -2 7345.07 2650.35   1
  -4  16  -2 5984.44 3087.12   1
   4 -16   3 4228.21 1952.89   1
   4 -16   3 3823.46 2652.64   1
  -4  16   3 5005.71 2487.99   1
  -4  16   3 6213.12 3048.25   1
   4  16  -3 7594.32 2394.24   1
   4  16  -3 5069.74 2798.99   1
  -4 -16  -3 4566.65 2307.34   1
  -4 -16  -3 2469.70 2170.36   1
   4  16   3 5744.33 4123.02   1
   4  16   3 4637.54 2529.15   1
  -4 -16   3 5323.57 1873.54   1
  -4 -16   3 2808.14 1898.47   1
   4 -16  -3 2812.71 2178.14   1
   4 -16  -3 3311.22 2616.05   1
  -4  16  -3 6567.57 2542.87   1
  -4  16  -3 4299.10 2874.45   1
   4 -16   4 7237.59 2517.72   1
   4 -16   4 5691.74 3011.66   1
  -4  16   4  30871. 7903.03   1
  -4  16   4  20997. 5835.81   1
   4  16  -4 9297.96 2718.95   1
   4  16  -4 4875.37 2856.16   1
  -4 -16  -4 5924.99 2387.37   1
  -4 -16  -4 2746.40 2778.41   1
   4  16   4 4754.17 4598.67   1
   4  16   4 4907.38 2819.57   1
  -4 -16   4 8339.80 2394.24   1
  -4 -16   4  13158. 3791.44   1
   4 -16  -4  11390. 3569.63   1
  -4  16  -4 9494.62 3055.11   1
  -4  16  -4 3789.16 2831.01   1
   4 -16   5  14841. 4033.84   1
   4 -16   5  12067. 4058.99   1
  -4  16   5  12625. 4139.03   1
  -4  16   5 9705.00 3683.97   1
   4  16  -5  11505. 3114.56   1
   4  16  -5 8303.22 3361.53   1
  -4 -16  -5  18022. 4825.06   1
  -4 -16  -5  14587. 4818.20   1
   4  16   5  -62.63 4296.82   1
   4  16   5 9753.02 3473.58   1
  -4 -16   5  13032. 3352.39   1
  -4 -16   5 9032.69 2988.79   1
   4 -16  -5  10016. 3498.74   1
   4 -16  -5 8831.46 3494.17   1
  -4  16  -5  13265. 3777.72   1
  -4  16  -5  12499. 4326.54   1
   4 -16   6  26252. 6624.74   1
   4 -16   6  15292. 4669.56   1
  -4  16   6  20922. 5922.70   1
   4  16  -6  20819. 5145.20   1
[truncated: 58,309 more chars]
